# Supplementary material for: Transcriptome Analysis of mRNA and miRNA in Somatic Embryos of Larix leptolepis Subjected to Hydrogen Treatment
Source: MDPI journal article supplement (doi:10.3390/ijms17111951), 2016-11-22
Supplement: s1 [file s1]

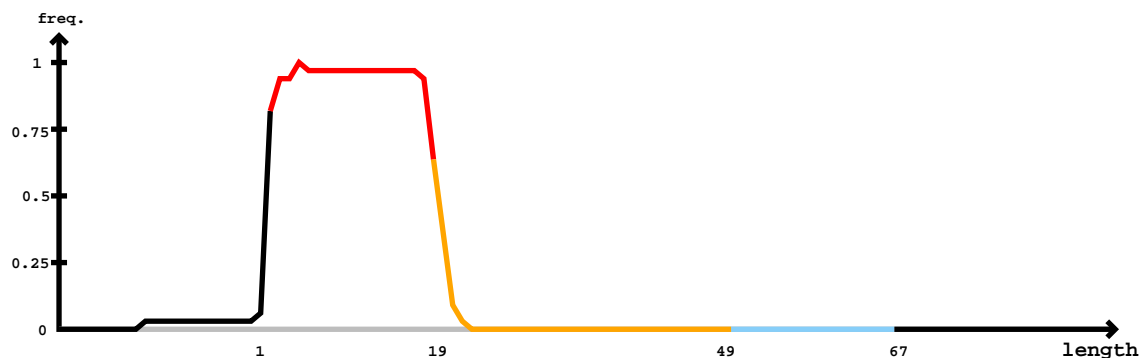

Star

[illegible]

Provisional ID : MA\_10074432\_34554  
Score total : 1.8  
Score for star read(s) : -1.3  
Score for read counts : 0  
Score for mfe : 1.5  
Score for randfold : 1.6  
Score for cons. seed :  
Total read count : 459  
Mature read count : 459  
Loop read count : 0  
Star read count : 0

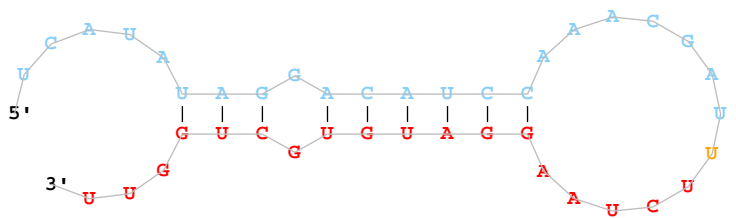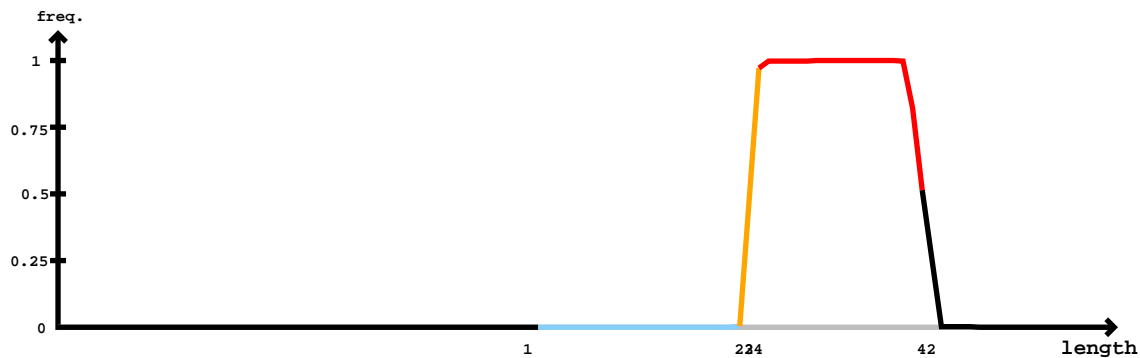

|                                                                                      |                      | Star                        |  | Mature                      |  |       |     |        |  |
|--------------------------------------------------------------------------------------|----------------------|-----------------------------|--|-----------------------------|--|-------|-----|--------|--|
| 5'                                                                                   |                      |                             |  |                             |  | -3'   | exp |        |  |
| uggaaacaaguugggcacuaacuuuauucaggcucgcugauaggga                                       | ucauauaggacauccaacga | uuuuaaggauugcuggu           |  | uucguuuggucucugucacaa       |  | reads | mm  | sample |  |
| ((.....)).....((((((((((.....))))))))).((((((.....((((((((.....))))))))).))))))..... |                      | .....uuucuaaggauugcugc..... |  | .....uuucuaaggauugcugc..... |  | 1     | 0   | seq    |  |
| .....uuucuaaggauugcugc.....                                                          |                      | .....uuucuaaggauugcugc..... |  | .....uuucuaaggauugcugc..... |  | 1     | 0   | seq    |  |
| .....uuucuaaggauugcugc.....                                                          |                      | .....uuucuaaggauugcugc..... |  | .....uuucuaaggauugcugc..... |  | 1     | 1   | seq    |  |
| .....uuucuaaggauugcugc.....                                                          |                      | .....uuucuaaggauugcugc..... |  | .....uuucuaaggauugcugc..... |  | 73    | 0   | seq    |  |
| .....uuucuaaggauugcugc.....                                                          |                      | .....uuucuaaggauugcugc..... |  | .....uuucuaaggauugcugc..... |  | 1     | 1   | seq    |  |
| .....uuucuaaggauugcugc.....                                                          |                      | .....uuucuaaggauugcugc..... |  | .....uuucuaaggauugcugc..... |  | 1     | 1   | seq    |  |
| .....uuucuaaggauugcugc.....                                                          |                      | .....uuucuaaggauugcugc..... |  | .....uuucuaaggauugcugc..... |  | 4     | 1   | seq    |  |
| .....uuucuaaggauugcugc.....                                                          |                      | .....uuucuaaggauugcugc..... |  | .....uuucuaaggauugcugc..... |  | 72    | 0   | seq    |  |
| .....uuucuaaggauugcugc.....                                                          |                      | .....uuucuaaggauugcugc..... |  | .....uuucuaaggauugcugc..... |  | 7     | 1   | seq    |  |
| .....uuucuaaggauugcugc.....                                                          |                      | .....uuucuaaggauugcugc..... |  | .....uuucuaaggauugcugc..... |  | 1     | 1   | seq    |  |
| .....uuucuaaggauugcugc.....                                                          |                      | .....uuucuaaggauugcugc..... |  | .....uuucuaaggauugcugc..... |  | 1     | 1   | seq    |  |
| .....uuucuaaggauugcugc.....                                                          |                      | .....uuucuaaggauugcugc..... |  | .....uuucuaaggauugcugc..... |  | 1     | 1   | seq    |  |
| .....uuucuaaggauugcugc.....                                                          |                      | .....uuucuaaggauugcugc..... |  | .....uuucuaaggauugcugc..... |  | 1     | 1   | seq    |  |
| .....uuucuaaggauugcugc.....                                                          |                      | .....uuucuaaggauugcugc..... |  | .....uuucuaaggauugcugc..... |  | 101   | 1   | seq    |  |
| .....uuucuaaggauugcugc.....                                                          |                      | .....uuucuaaggauugcugc..... |  | .....uuucuaaggauugcugc..... |  | 2     | 1   | seq    |  |
| .....uuucuaaggauugcugc.....                                                          |                      | .....uuucuaaggauugcugc..... |  | .....uuucuaaggauugcugc..... |  | 4     | 1   | seq    |  |
| .....uuucuaaggauugcugc.....                                                          |                      | .....uuucuaaggauugcugc..... |  | .....uuucuaaggauugcugc..... |  | 2     | 1   | seq    |  |
| .....uuucuaaggauugcugc.....                                                          |                      | .....uuucuaaggauugcugc..... |  | .....uuucuaaggauugcugc..... |  | 10    | 1   | seq    |  |
| .....uuucuaaggauugcugc.....                                                          |                      | .....uuucuaaggauugcugc..... |  | .....uuucuaaggauugcugc..... |  | 41    | 0   | seq    |  |
| .....uuucuaaggauugcugc.....                                                          |                      | .....uuucuaaggauugcugc..... |  | .....uuucuaaggauugcugc..... |  | 1     | 1   | seq    |  |
| .....uuucuaaggauugcugc.....                                                          |                      | .....uuucuaaggauugcugc..... |  | .....uuucuaaggauugcugc..... |  | 119   | 1   | seq    |  |
| .....uuucuaaggauugcugc.....                                                          |                      | .....uuucuaaggauugcugc..... |  | .....uuucuaaggauugcugc..... |  | 12    | 1   | seq    |  |
| .....uuucuaaggauugcugc.....                                                          |                      | .....uuucuaaggauugcugc..... |  | .....uuucuaaggauugcugc..... |  | 1     | 1   | seq    |  |

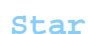

| 5'                                                                                 | uggaaaaaucucacccuugaauucucgucac <u>uaucaaggguugagccu</u> ggguuuacuccaugugacccu <u>aaauagucucuuugauggu</u> uacacaguauucucugaacc | -3' | exp |        |
|------------------------------------------------------------------------------------|--------------------------------------------------------------------------------------------------------------------------------|-----|-----|--------|
| .....(((((((.....((((((((((((.....((((((.....)))))).....)))))))).))..)))))))).)).. | reads                                                                                                                          | mm  |     | sample |
| .....Tuauagucucuuugaug.....                                                        | 17                                                                                                                             | 1   |     | seq    |
| .....Cuauagucucuuugaug.....                                                        | 1                                                                                                                              | 1   |     | seq    |
| .....Tuauagucucuuugaugg.....                                                       | 13                                                                                                                             | 1   |     | seq    |
| .....Tuauagucucuuugauggu.....                                                      | 7                                                                                                                              | 1   |     | seq    |
| .....Guauagucucuuugauggu.....                                                      | 1                                                                                                                              | 1   |     | seq    |
| .....uauagucucuuugaugg.....                                                        | 4                                                                                                                              | 0   |     | seq    |
| .....uauagucucuuugaugA.....                                                        | 1                                                                                                                              | 1   |     | seq    |
| .....uauagucucuuugauggC.....                                                       | 3                                                                                                                              | 1   |     | seq    |
| .....uauaguAucuuugauggu.....                                                       | 1                                                                                                                              | 1   |     | seq    |
| .....uauagucucuuugauggu.....                                                       | 8                                                                                                                              | 0   |     | seq    |
| .....uauagucucuuugauggG.....                                                       | 1                                                                                                                              | 1   |     | seq    |
| .....uauagucucuuugaugguA.....                                                      | 2                                                                                                                              | 1   |     | seq    |
| .....auagucucuuugauggC.....                                                        | 3                                                                                                                              | 1   |     | seq    |
| .....auagucucuuugauggu.....                                                        | 18                                                                                                                             | 0   |     | seq    |
| .....auaguGucuuugauggu.....                                                        | 2                                                                                                                              | 1   |     | seq    |
| .....auagucucuuugauggG.....                                                        | 1                                                                                                                              | 1   |     | seq    |
| .....auagucucuuugaugguA.....                                                       | 4                                                                                                                              | 1   |     | seq    |
| .....auagucucuuugaugguG.....                                                       | 1                                                                                                                              | 1   |     | seq    |
| .....uagucucuuugaugguA.....                                                        | 15                                                                                                                             | 1   |     | seq    |
| .....uagucucuuugaugguG.....                                                        | 1                                                                                                                              | 1   |     | seq    |



Star

Mature

uucgacuggggugaccuuggaacacauucacaguacucaugaugagagauagagagauucauguggacguguuuccaggucgccucagucgaaaccuccucugcu

Provisional ID : MA\_10099790\_39948  
Score total : 1.5  
Score for star read(s) : -1.3  
Score for read counts : 0  
Score for mfe : 1.2  
Score for randfold : 1.6  
Score for cons. seed :  
Total read count : 21  
Mature read count : 21  
Loop read count : 0  
Star read count : 0

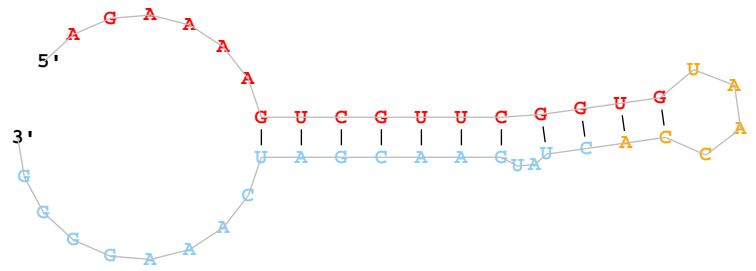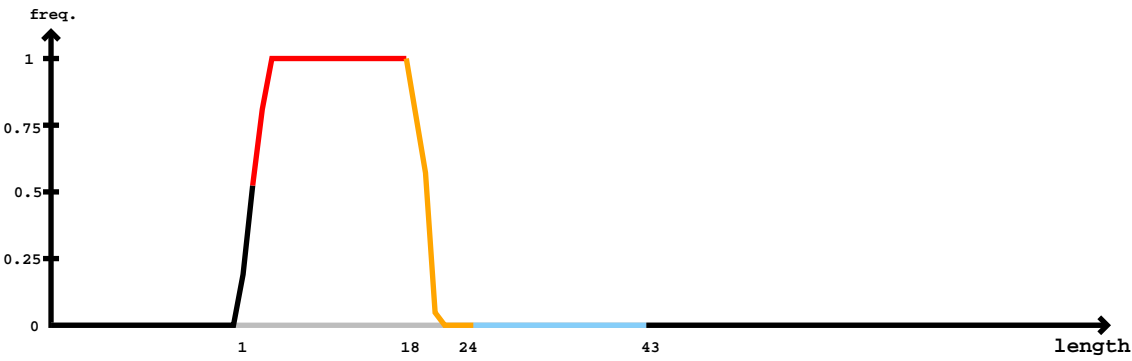

| Mature |                                                                                                               | Star  |     |  |  |        |  |
|--------|---------------------------------------------------------------------------------------------------------------|-------|-----|--|--|--------|--|
| 5'     | acaaacacacacacaggagaaaaagucguucgguguuaaccacuaugaacgaucaaaaggggaagcaucaauaugcgugcggaagguggggauuauuccacca       | -3'   | exp |  |  |        |  |
|        | .....((((.....((((((((((.....)))))).....)))).....((((.....)))).....)))).....((((((((.....)))))).....))))..... | reads | mm  |  |  | sample |  |
|        | .....Aagaaaagucguucggug.....                                                                                  | 1     | 1   |  |  | seq    |  |
|        | .....Aagaaaagucguucggugu.....                                                                                 | 1     | 1   |  |  | seq    |  |
|        | .....Aagaaaagucguucggugua.....                                                                                | 2     | 1   |  |  | seq    |  |
|        | .....agaaaagucguucggug.....                                                                                   | 6     | 0   |  |  | seq    |  |
|        | .....agaaaagucguucggugua.....                                                                                 | 1     | 0   |  |  | seq    |  |
|        | .....gaaaagucguucggugC.....                                                                                   | 1     | 1   |  |  | seq    |  |
|        | .....gaaaagucguucggugua.....                                                                                  | 5     | 0   |  |  | seq    |  |
|        | .....aaaagucguucggugua.....                                                                                   | 3     | 0   |  |  | seq    |  |
|        | .....aaaagucguucgguguaU.....                                                                                  | 1     | 1   |  |  | seq    |  |

Provisional ID : MA\_10114\_10681  
Score total : 1.1  
Score for star read(s) : -1.3  
Score for read counts : 0  
Score for mfe : 0.8  
Score for randfold : 1.6  
Score for cons. seed :  
Total read count : 97  
Mature read count : 97  
Loop read count : 0  
Star read count : 0

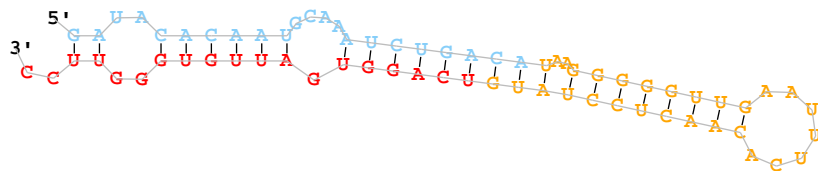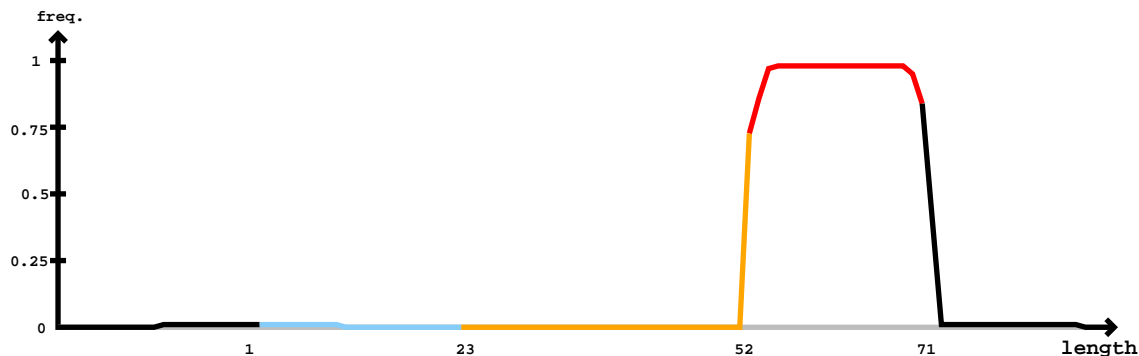

Star

Mature

|    |                                                                                       |                          |                                 |                                        |       |     |        |
|----|---------------------------------------------------------------------------------------|--------------------------|---------------------------------|----------------------------------------|-------|-----|--------|
| 5' | aacuaacgguuuagcucaau                                                                  | gaucacacaauugcaaaucugaca | uaagggggguugaauuucacaaucuccuaug | ucaggugauuguggguuccaugggucauuugaaaauag | -3'   | exp |        |
|    | (((((.....)))).....(((((((.....(((((((.....(((((((.....)))))))))))))))).....))))..... |                          |                                 |                                        | reads | mm  | sample |
|    | .....uGagcucaauugauacacaa.....                                                        |                          |                                 |                                        | 1     | 1   | seq    |
|    | .....ucaggugauuguggguG.....                                                           |                          |                                 |                                        | 1     | 1   | seq    |
|    | .....ucaggugauuguggguu.....                                                           |                          |                                 |                                        | 1     | 0   | seq    |
|    | .....ucaggugauuguggguC.....                                                           |                          |                                 |                                        | 1     | 1   | seq    |
|    | .....ucaggGgauuguggguuc.....                                                          |                          |                                 |                                        | 1     | 1   | seq    |
|    | .....ucaggAgauuguggguuc.....                                                          |                          |                                 |                                        | 1     | 1   | seq    |
|    | .....ucaggugauuguggguuc.....                                                          |                          |                                 |                                        | 8     | 0   | seq    |
|    | .....ucaggugauuguggguCc.....                                                          |                          |                                 |                                        | 1     | 1   | seq    |
|    | .....ucaggCgauuguggguucc.....                                                         |                          |                                 |                                        | 58    | 1   | seq    |
|    | .....caggugauuguggguuc.....                                                           |                          |                                 |                                        | 1     | 0   | seq    |
|    | .....caggCgauuguggguucc.....                                                          |                          |                                 |                                        | 12    | 1   | seq    |
|    | .....aggCgauuguggguucc.....                                                           |                          |                                 |                                        | 11    | 1   | seq    |
|    | .....ggCgauuguggguucca.....                                                           |                          |                                 |                                        | 1     | 1   | seq    |
|    | .....cauggucauuGgaaua.....                                                            |                          |                                 |                                        | 1     | 1   | seq    |

Provisional ID : MA\_10148035\_40528  
Score total : 4339.7  
Score for star read(s) : 3.9  
Score for read counts : 4361.2  
Score for mfe : -26.9  
Score for randfold : 1.6  
Score for cons. seed :  
Total read count : 8566  
Mature read count : 7723  
Loop read count : 0  
Star read count : 843

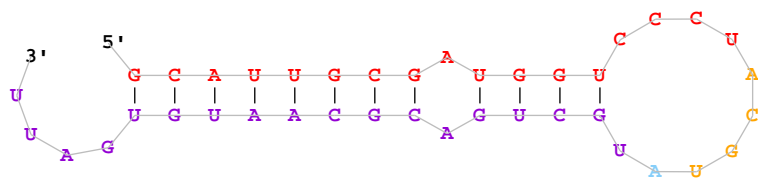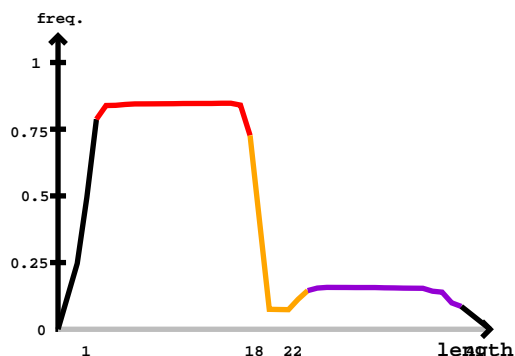

## Mature Star

| 5' -                                          | obs | exp | reads | mm | sample |
|-----------------------------------------------|-----|-----|-------|----|--------|
| aagcauugcgauaggucuccuacguaugcugacgcaaugugauuu |     |     |       |    |        |
| ..(((((((.....)))))).)))))).....              |     |     |       |    |        |
| aagcauugcgauaggucUc.....                      | 1   | 1   | 1     | 1  | seq    |
| aagcauugcgauaggucA.....                       | 2   | 1   | 2     | 1  | seq    |
| aagcauUcggauggucc.....                        | 1   | 1   | 1     | 1  | seq    |
| aagcauugcgauaggucc.....                       | 61  | 0   | 61    | 0  | seq    |
| aagcauugGgaugguccc.....                       | 1   | 1   | 1     | 1  | seq    |
| aagcauugcgauaggucUc.....                      | 2   | 1   | 2     | 1  | seq    |
| aagcauUcggaugguccc.....                       | 3   | 1   | 3     | 1  | seq    |
| aagcauugcgauaggucUcc.....                     | 1   | 1   | 1     | 1  | seq    |
| aagcauugcgauagguccc.....                      | 449 | 0   | 449   | 0  | seq    |
| aagcauugcgauAguccc.....                       | 1   | 1   | 1     | 1  | seq    |
| aagcauugcgauaggGccc.....                      | 1   | 1   | 1     | 1  | seq    |
| Cagcauugcgauagguccc.....                      | 1   | 1   | 1     | 1  | seq    |
| aagcauugcgauaggucGc.....                      | 1   | 1   | 1     | 1  | seq    |
| Gagcauugcgauagguccc.....                      | 2   | 1   | 2     | 1  | seq    |
| aagcauugcgauaggCccc.....                      | 3   | 1   | 3     | 1  | seq    |
| aagcauugcgauagguccG.....                      | 5   | 1   | 5     | 1  | seq    |
| aagcauugcgauagguaAcc.....                     | 1   | 1   | 1     | 1  | seq    |
| aagcauugcgGugguccc.....                       | 2   | 1   | 2     | 1  | seq    |
| aagcaUcggaugguccc.....                        | 1   | 1   | 1     | 1  | seq    |
| Uagcauugcgauagguccc.....                      | 1   | 1   | 1     | 1  | seq    |
| aagcGuugcgauagguccc.....                      | 1   | 1   | 1     | 1  | seq    |
| aagcauugcgGuggucccu.....                      | 8   | 1   | 8     | 1  | seq    |
| aGcauugcgauaggucccu.....                      | 3   | 1   | 3     | 1  | seq    |
| aUgcauugcgauaggucccu.....                     | 2   | 1   | 2     | 1  | seq    |
| aagcGuugcgauaggucccu.....                     | 2   | 1   | 2     | 1  | seq    |
| Nagcauugcgauaggucccu.....                     | 1   | 1   | 1     | 1  | seq    |
| Uagcauugcgauaggucccu.....                     | 1   | 1   | 1     | 1  | seq    |
| aagcaUcggauggucccu.....                       | 2   | 1   | 2     | 1  | seq    |
| aagcauugcgauaggucccG.....                     | 53  | 1   | 53    | 1  | seq    |
| Cagcauugcgauaggucccu.....                     | 2   | 1   | 2     | 1  | seq    |
| aagcauugcgauaggucccC.....                     | 221 | 1   | 221   | 1  | seq    |
| aagcauugcgauaggucccA.....                     | 64  | 1   | 64    | 1  | seq    |
| aagcauugcgauaggucAcu.....                     | 2   | 1   | 2     | 1  | seq    |



# Mature Star

aagcauugcgauugucccuacguaugcugacgcaaugugauuu

|                                       |      |   |     |
|---------------------------------------|------|---|-----|
| aagcauugcgauugucccu.....              | 1    | 1 | seq |
| aagcauugcgauugucccu.....              | 1141 | 0 | seq |
| aagcauugcgacgguucccu.....             | 3    | 1 | seq |
| aagcauugcgauugggcccu.....             | 1    | 1 | seq |
| aagcauugcgauugguUcu.....              | 3    | 1 | seq |
| aagcauugcgauugggcccu.....             | 3    | 1 | seq |
| aagcauugcgauugguUccu.....             | 1    | 1 | seq |
| aagcauugcgauAgucccu.....              | 1    | 1 | seq |
| Gagcauugcgauugucccu.....              | 3    | 1 | seq |
| Nagcauugcgauugucccu.....              | 1    | 1 | seq |
| aagUauugcgauugucccu.....              | 1    | 1 | seq |
| aagcauUcgauugucccu.....               | 1    | 1 | seq |
| aagcauugcgauugucccAa.....             | 1    | 1 | seq |
| aagcauugcgauugucccCa.....             | 7    | 1 | seq |
| aagcauugcgauugucccu.....              | 183  | 0 | seq |
| aagcaUcgauugucccu.....                | 2    | 1 | seq |
| Cagcauugcgauugucccu.....              | 1    | 1 | seq |
| aagcauugcgGuggucccu.....              | 1    | 1 | seq |
| aagcauugcgauuguccGua.....             | 1    | 1 | seq |
| aagcauugcgauugucccu.....              | 1    | 1 | seq |
| aagcauugcgauugucccuCc.....            | 1    | 1 | seq |
| aagcauugcgauugucccuGcgua.....         | 1    | 1 | seq |
| .Ugcauugcgauugucc.....                | 1    | 1 | seq |
| .agcauugcgauugggcc.....               | 2    | 1 | seq |
| .agcauugcgauugguUc.....               | 1    | 1 | seq |
| .Ggcauugcgauugucc.....                | 1    | 1 | seq |
| .agcauugcgauugggcc.....               | 2    | 1 | seq |
| .agcauugcgauugucc.....                | 545  | 0 | seq |
| .agcauugcgauuguccG.....               | 8    | 1 | seq |
| .agcauugcgGuggucc.....                | 3    | 1 | seq |
| .agcauugcgacggucc.....                | 1    | 1 | seq |
| .agcaUcgauugucc.....                  | 3    | 1 | seq |
| .agcauUcgauugucc.....                 | 1    | 1 | seq |
| .agcauugcgUuggucccu.....              | 1    | 1 | seq |
| .agcauugcgUuggucccu.....              | 1    | 1 | seq |
| .agGauugcgauugucccu.....              | 1    | 1 | seq |
| .agcauugcgauugggcccu.....             | 1    | 1 | seq |
| .agcauugcgacggucccu.....              | 3    | 1 | seq |
| .agcaUcgauugucccu.....                | 2    | 1 | seq |
| .agcauugcgauugucccu.....              | 2    | 1 | seq |
| .agcauugcgauugucccA.....              | 64   | 1 | seq |
| .agcauugcgauugucccG.....              | 55   | 1 | seq |
| .agcGuugcgauugucccu.....              | 3    | 1 | seq |
| .agcauugcgGuggucccu.....              | 5    | 1 | seq |
| .agcauugcgauugggcccu.....             | 2    | 1 | seq |
| .agcauugcgauugucccu.....              | 1124 | 0 | seq |
| .agcauugcgauugucccC.....              | 217  | 1 | seq |
| .agcauUcgauugucccu.....               | 1    | 1 | seq |
| .agcauugGgauugucccu.....              | 2    | 1 | seq |
| .agcauugcgacggucccu.....              | 1    | 1 | seq |
| .agcauugcgauugguGccu.....             | 1    | 1 | seq |
| .agcauGgcgauugucccu.....              | 1    | 1 | seq |
| .agcauugcgauugguGcu.....              | 1    | 1 | seq |
| .agcauugcgauugucccCa.....             | 10   | 1 | seq |
| .agcauugcgauugucccu.....              | 189  | 0 | seq |
| .agcauugcgauugggcccu.....             | 1    | 1 | seq |
| .agcauugcgauugguUua.....              | 1    | 1 | seq |
| .agcauugcgauAgucccu.....              | 1    | 1 | seq |
| .Ggcauugcgauugucccu.....              | 1    | 1 | seq |
| .agcGuugcgauugucccu.....              | 1    | 1 | seq |
| .agcauUcgauugucccu.....               | 1    | 1 | seq |
| .agcauugcgauugucccuacg.....           | 1    | 0 | seq |
| .agcauugcgauugucccuGcg.....           | 3    | 1 | seq |
| .agcauugcgauugucccuGcgua.....         | 1    | 1 | seq |
| .agcauugcgauugucccuGcguaugcugacg..... | 1    | 1 | seq |
| .gcuUugcgauugucccu.....               | 1    | 1 | seq |
| .Ccauugcgauugucccu.....               | 1    | 1 | seq |
| .gcauugcgauugguAcu.....               | 3    | 1 | seq |
| .Ncauugcgauugucccu.....               | 4    | 1 | seq |
| .gcauugcgauugucccu.....               | 1771 | 0 | seq |

# Mature Star

aaagcauugcgauuggucccuacguaugcugacgcaaugugauuu

|                                         |     |   |     |
|-----------------------------------------|-----|---|-----|
| ..gcauAgcgauggucccu.....                | 1   | 1 | seq |
| ..gGauugcgauuggucccu.....               | 2   | 1 | seq |
| ..gcGuugcgauuggucccu.....               | 6   | 1 | seq |
| ..gcauugcgAagggucccu.....               | 2   | 1 | seq |
| ..gcauugcgUuggucccu.....                | 3   | 1 | seq |
| ..gcauugcgauuguAccu.....                | 3   | 1 | seq |
| ..gcaCugcgauuggucccu.....               | 1   | 1 | seq |
| ..gcauugcgGuggucccu.....                | 8   | 1 | seq |
| ..gcauugcgauuguUccu.....                | 1   | 1 | seq |
| ..gcauGcgauuggucccu.....                | 3   | 1 | seq |
| ..gcauugcgauugguccC.....                | 331 | 1 | seq |
| ..gcauugcgauuAucccu.....                | 3   | 1 | seq |
| ..gcauugcgauugguUcu.....                | 3   | 1 | seq |
| ..gcauugcgauAGucccu.....                | 1   | 1 | seq |
| ..gcauugcgAagggucccu.....               | 3   | 1 | seq |
| ..gcauGgcgauggucccu.....                | 1   | 1 | seq |
| ..gcauugcgauUgucccu.....                | 1   | 1 | seq |
| ..gcauugcgauugguccA.....                | 75  | 1 | seq |
| ..gcauugcgauugGcccu.....                | 2   | 1 | seq |
| ..gcauugAgauggucccu.....                | 1   | 1 | seq |
| ..gcauugcgauugguccG.....                | 82  | 1 | seq |
| ..gcauugcgauugGcccu.....                | 2   | 1 | seq |
| ..gcauugcgGuggucccua.....               | 3   | 1 | seq |
| ..gcaCugcgauuggucccua.....              | 1   | 1 | seq |
| ..gcauugcgauuggucccCa.....              | 17  | 1 | seq |
| ..gUauugcgauuggucccua.....              | 1   | 1 | seq |
| ..gcauugcgauuggucccGa.....              | 4   | 1 | seq |
| ..gcauugcgauuggucccua.....              | 321 | 0 | seq |
| ..gcauugcgauugGcccu.....                | 2   | 1 | seq |
| ..gcauGcgauuggucccua.....               | 1   | 1 | seq |
| ..gcauugcgauuggucccAa.....              | 1   | 1 | seq |
| ..gcauugcgAagggucccua.....              | 1   | 1 | seq |
| ..Acauugcgauuggucccua.....              | 1   | 1 | seq |
| ..gcauugcgauugguccuCc.....              | 2   | 1 | seq |
| ..gcauugcgauugguccuacg.....             | 2   | 0 | seq |
| ..gcauugcgauugguccuGcgu.....            | 13  | 1 | seq |
| ..gcauugcgauugguccuacgCa.....           | 1   | 1 | seq |
| ..gcauugcgauugguccuacguU.....           | 1   | 1 | seq |
| ..gcauugcgauugguccuGcgua.....           | 1   | 1 | seq |
| ..gcauugcgauugguccuGcguaug.....         | 1   | 1 | seq |
| ..gcauugcgauugguccuGcguaugcug.....      | 1   | 1 | seq |
| ...cauugcgauuggucccAa.....              | 1   | 1 | seq |
| ...Nauugcgauuggucccua.....              | 1   | 1 | seq |
| ...cauugcgauugGcccu.....                | 1   | 1 | seq |
| ...cauugcgAagggucccua.....              | 1   | 1 | seq |
| ...cauugcgauuggucccCa.....              | 21  | 1 | seq |
| ...cGuugcgauuggucccua.....              | 1   | 1 | seq |
| ...cauugcgauugguGccua.....              | 1   | 1 | seq |
| ...cauugcgauugguUcua.....               | 2   | 1 | seq |
| ...cauugcgauuggucccua.....              | 417 | 0 | seq |
| ...Uauugcgauuggucccua.....              | 1   | 1 | seq |
| ...cauugcgauuAucccu.....                | 1   | 1 | seq |
| ...cauugcgauuggucccGa.....              | 1   | 1 | seq |
| ...cauugcgauugguccuac.....              | 1   | 0 | seq |
| ...cauugcgauugguccuCc.....              | 5   | 1 | seq |
| ...cauugcgauugguccuUc.....              | 1   | 1 | seq |
| ...cauugcgauugguccuacg.....             | 1   | 0 | seq |
| ...cauugcgauugguccuacA.....             | 1   | 1 | seq |
| ...cauugcgauugguccuacU.....             | 1   | 1 | seq |
| ...cauugcgauugguccuGcgu.....            | 10  | 1 | seq |
| ...cauugcgauugguccuGcguaugcugacgca..... | 1   | 1 | seq |
| ...auugcgauugguccuCc.....               | 2   | 1 | seq |
| ...auugcgauugguccuac.....               | 1   | 0 | seq |
| ...auugcgauugguccuGcgu.....             | 2   | 1 | seq |
| ...auugcgauugguccuacguC.....            | 1   | 1 | seq |
| ...auugcgauugguccuGcguaugcugacgca.....  | 1   | 1 | seq |
| ...uugcgauugguccuUcg.....               | 1   | 1 | seq |
| ...uugcgauugguccuacA.....               | 1   | 1 | seq |
| ...uugcgauugguccuGcgu.....              | 16  | 1 | seq |
| ...uugcgauugguccuGcgua.....             | 2   | 1 | seq |

# Mature Star

aagcauugcgauggucccuacguaugcugacgcaaugugauuu

|                                              |     |   |     |
|----------------------------------------------|-----|---|-----|
| .....uugcgauggucccuGcguaugc.....             | 2   | 1 | seq |
| .....uugcgauggucccuGcguaugcu.....            | 1   | 1 | seq |
| .....uugcgauggucccuGcguaugcug.....           | 1   | 1 | seq |
| .....uugcgauggucccuGcguaugcugacgca.....      | 1   | 1 | seq |
| .....uugcgauggucccuGcguaugcugacgcaa.....     | 1   | 1 | seq |
| .....uugcgauggucccuGcguaugcugacgcaaug.....   | 3   | 1 | seq |
| .....uugcgauggucccuGcguaugcugacgcaaugug..... | 1   | 1 | seq |
| .....ugcgauggucccuGcgu.....                  | 13  | 1 | seq |
| .....ugcgauggucccuGcgua.....                 | 1   | 1 | seq |
| .....ugcgauggucccuGcguaugcugacg.....         | 2   | 1 | seq |
| .....ugcgauggucccuGcguaugcugacgcaau.....     | 2   | 1 | seq |
| .....gCGauggucccuGcguaugcugacgcaa.....       | 1   | 1 | seq |
| .....cgauggucccuGcgua.....                   | 1   | 1 | seq |
| .....cgauggucccuGcguaug.....                 | 1   | 1 | seq |
| .....gauggucccuGcguaugcugacg.....            | 2   | 1 | seq |
| .....gauggucccuGcguaugcugacgcaau.....        | 1   | 1 | seq |
| .....auggucccuGcguaugcugacgca.....           | 1   | 1 | seq |
| .....auggucccuGcguaugcugacgcaaug.....        | 1   | 1 | seq |
| .....uggucccuGcguaugcugacg.....              | 1   | 1 | seq |
| .....uggucccuGcguaugcugacgc.....             | 1   | 1 | seq |
| .....uggucccuGcguaugcugacgca.....            | 1   | 1 | seq |
| .....uggucccuGcguaugcugacgcaaug.....         | 1   | 1 | seq |
| .....uggucccuGcguaugcugacgcaaugug.....       | 2   | 1 | seq |
| .....ggucccuGcguaugcugacgca.....             | 1   | 1 | seq |
| .....gucccuGcguaugcugacg.....                | 1   | 1 | seq |
| .....cccuGcguaugcugacg.....                  | 3   | 1 | seq |
| .....cccuGcguaugcugacgc.....                 | 2   | 1 | seq |
| .....cccuGcguaugcugacgca.....                | 1   | 1 | seq |
| .....cccuGcguaugcugacgcaaugu.....            | 1   | 1 | seq |
| .....cuGcguaugcugacgca.....                  | 1   | 1 | seq |
| .....uGcguaugcugacgcaaugug.....              | 1   | 1 | seq |
| .....Gcguaugcugacgcaaug.....                 | 2   | 1 | seq |
| .....Gcguaugcugacgcaaugug.....               | 9   | 1 | seq |
| .....Gcguaugcugacgcaaugugauu.....            | 1   | 1 | seq |
| .....Aguaugcugacgcaaug.....                  | 1   | 1 | seq |
| .....cguaugcugacgcaaug.....                  | 25  | 0 | seq |
| .....cguaugcugacgcaauA.....                  | 1   | 1 | seq |
| .....cgCaugcugacgcaaug.....                  | 5   | 1 | seq |
| .....cgAaugcugacgcaaug.....                  | 59  | 1 | seq |
| .....cNuaugcugacgcaaug.....                  | 1   | 1 | seq |
| .....Nguaugcugacgcaaug.....                  | 1   | 1 | seq |
| .....cgAaugcugacgcaaugu.....                 | 20  | 1 | seq |
| .....cguaugcugacgcaaugG.....                 | 1   | 1 | seq |
| .....cgCaugcugacgcaaugu.....                 | 2   | 1 | seq |
| .....cUuaugcugacgcaaugu.....                 | 1   | 1 | seq |
| .....cNuaugcugacgcaaugu.....                 | 1   | 1 | seq |
| .....cguaugcugacgcaaugu.....                 | 3   | 0 | seq |
| .....Nguaugcugacgcaaugu.....                 | 2   | 1 | seq |
| .....cguaugcugacgcaGugug.....                | 2   | 1 | seq |
| .....cguaugcugacgcaauguA.....                | 5   | 1 | seq |
| .....Nguaugcugacgcaaugug.....                | 12  | 1 | seq |
| .....cUuaugcugacgcaaugug.....                | 2   | 1 | seq |
| .....cgCaugcugacgcaaugug.....                | 26  | 1 | seq |
| .....cguaugcugacgcaaugug.....                | 88  | 0 | seq |
| .....cguaugcugaUgcaaugug.....                | 1   | 1 | seq |
| .....Uguaugcugacgcaaugug.....                | 2   | 1 | seq |
| .....cgAaugcugacgcaaugug.....                | 201 | 1 | seq |
| .....cguaugcugacgcGaugug.....                | 1   | 1 | seq |
| .....cguaugcugGcgcaaugug.....                | 1   | 1 | seq |
| .....cguaugcCGacgcaaugug.....                | 1   | 1 | seq |
| .....Gguaugcugacgcaaugug.....                | 1   | 1 | seq |
| .....cNuaugcugacgcaaugug.....                | 5   | 1 | seq |
| .....Aguaugcugacgcaaugug.....                | 1   | 1 | seq |
| .....cguaugcugacgcaCGug.....                 | 1   | 1 | seq |
| .....cgAaugcugacgcaauguga.....               | 11  | 1 | seq |
| .....Nguaugcugacgcaauguga.....               | 2   | 1 | seq |
| .....cgCaugcugacgcaauguga.....               | 2   | 1 | seq |
| .....cguaugcugacgcaauguga.....               | 4   | 0 | seq |
| .....cgAaugcugacgcaaugugau.....              | 7   | 1 | seq |
| .....cgCaugcugacgcaaugugau.....              | 1   | 1 | seq |

# Mature Star

aagcauugcgauggucccuacguaugcugacgcaaugugauuu

|                               |     |   |     |
|-------------------------------|-----|---|-----|
| .....cguaugcugacgcaaugugau..  | 6   | 0 | seq |
| .....cguaugcugacgcaaugugaG..  | 1   | 1 | seq |
| .....Nguaugcugacgcaaugugauu.. | 1   | 1 | seq |
| .....cgAaugcugacgcaaugugauu.. | 21  | 1 | seq |
| .....cguaugcugacgcaaugugauu.. | 6   | 0 | seq |
| .....cgCaugcugacgcaaugugauu.. | 2   | 1 | seq |
| .....cguaugcugacgcaaugugauG.. | 1   | 1 | seq |
| .....cguaugcugacgcaaugugauuu  | 1   | 0 | seq |
| .....cgAaugcugacgcaaugugauuu  | 4   | 1 | seq |
| .....guaugcugacgcaaugC.....   | 1   | 1 | seq |
| .....guaugcugacgcaaugu.....   | 1   | 0 | seq |
| .....gAaugcugacgcaaugug.....  | 2   | 1 | seq |
| .....Nuaugcugacgcaaugug.....  | 1   | 1 | seq |
| .....guaugcugacgcaaugugauu..  | 1   | 0 | seq |
| .....uCugcugacgcaaugug.....   | 1   | 1 | seq |
| .....Aaugcugacgcaaugug.....   | 1   | 1 | seq |
| .....Naugcugacgcaaugugauu..   | 1   | 1 | seq |
| .....augcugacgcaauguga....    | 98  | 0 | seq |
| .....augcugacgcaaugugU...     | 3   | 1 | seq |
| .....augcugacgcaaugGga...     | 1   | 1 | seq |
| .....augcCgacgcaauguga....    | 1   | 1 | seq |
| .....Gugcugacgcaaugugau..     | 2   | 1 | seq |
| .....augcugacgcaaugugaC..     | 14  | 1 | seq |
| .....augcugacgcaauAugau..     | 1   | 1 | seq |
| .....augcugacgcaaugugaG..     | 1   | 1 | seq |
| .....augcugacgcaaugugGu..     | 1   | 1 | seq |
| .....augcugacgcaaugugau..     | 83  | 0 | seq |
| .....auAcugacgcaaugugauu..    | 1   | 1 | seq |
| .....augcugacgcaaugugauG..    | 2   | 1 | seq |
| .....augcugacgcaaugugaGu..    | 1   | 1 | seq |
| .....augcugacgcaaugugaAu..    | 1   | 1 | seq |
| .....augcugacgcaaugugauC..    | 26  | 1 | seq |
| .....Cugcugacgcaaugugauu..    | 1   | 1 | seq |
| .....augcugacgcaauAugauu..    | 1   | 1 | seq |
| .....augcugacgcGaugugauu..    | 1   | 1 | seq |
| .....augcugacgcaaugugauu..    | 164 | 0 | seq |
| .....augcugacgcaaCgugauu..    | 1   | 1 | seq |
| .....augcuCacgcaaugugauu..    | 1   | 1 | seq |
| .....augcugacgcaaugugauuu     | 5   | 0 | seq |
| .....augcugacgcaaugugauuC     | 2   | 1 | seq |
| .....Cgcugacgcaaugugau..      | 1   | 1 | seq |
| .....ugcugacgcaaugugaC..      | 13  | 1 | seq |
| .....ugcugacgcaaugugau..      | 71  | 0 | seq |
| .....ugcugacgcaaugugaA..      | 1   | 1 | seq |
| .....ugcugacgcaaugugUu..      | 1   | 1 | seq |
| .....ugcugacgcaaugugauu..     | 171 | 0 | seq |
| .....ugcugacgcaaugugGuu..     | 2   | 1 | seq |
| .....ugcugacgcaUugugauu..     | 1   | 1 | seq |
| .....ugcugacgcaaCgugauu..     | 1   | 1 | seq |
| .....uAcugacgcaaugugauu..     | 2   | 1 | seq |
| .....ugcugacgcGaugugauu..     | 1   | 1 | seq |
| .....ugcugacgcaaugugaCu..     | 2   | 1 | seq |
| .....ugcugacgcaGugugauu..     | 2   | 1 | seq |
| .....ugGugacgcaaugugauu..     | 1   | 1 | seq |
| .....ugcugacgcaaugugauC..     | 20  | 1 | seq |
| .....ugcugacgcaaugugauuC      | 3   | 1 | seq |
| .....ugcugacgcaaugugauuu      | 14  | 0 | seq |
| .....gcugacgcaaugugGuu..      | 1   | 1 | seq |
| .....gcugacgcaaugugauA..      | 1   | 1 | seq |
| .....gcugacgcaaugugCu..       | 1   | 1 | seq |
| .....gcugacgcaaugugauu..      | 74  | 0 | seq |
| .....gcugacgcaaugugauC..      | 8   | 1 | seq |
| .....gcugacgcaaugugauG..      | 1   | 1 | seq |
| .....gcugacgcaaugCgauu..      | 1   | 1 | seq |
| .....gcugacgcaaugugauuu       | 2   | 0 | seq |
| .....cugacgcaaugugauuC        | 4   | 1 | seq |
| .....cugacgcaGugugauuu        | 1   | 1 | seq |
| .....cugacgcaaugugauuu        | 21  | 0 | seq |

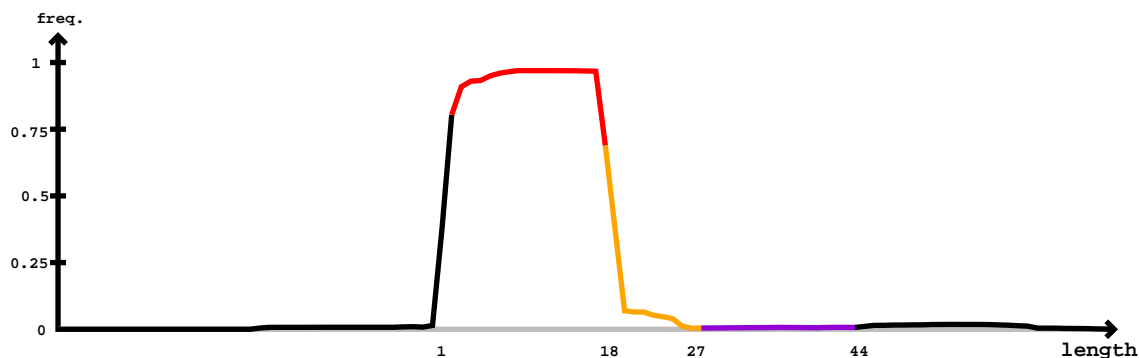[illegible]

# Mature Star

|                                        |                                                                       |      |   |     |
|----------------------------------------|-----------------------------------------------------------------------|------|---|-----|
| ggguucgucaggaugugaggaauagacucucgcacaug | gaauaucucgggcucucugucacgaugacgaauagucgaaugcaauacuagugugaauugaagaauccc |      |   |     |
| .....auggauaucucgggcucG.....           |                                                                       | 1    | 1 | seq |
| .....auggauaucucgggcucuC.....          |                                                                       | 1    | 1 | seq |
| .....auggauaucucgggcucuCg.....         |                                                                       | 12   | 1 | seq |
| .....auggauaucucgggcucuCgu.....        |                                                                       | 9    | 1 | seq |
| .....Ggggauaucucgggcucuu.....          |                                                                       | 1    | 1 | seq |
| .....ugggauaucucgggcucuu.....          |                                                                       | 1    | 0 | seq |
| .....ugggauaucucgggcucuC.....          |                                                                       | 6    | 1 | seq |
| .....ugggauaucucgggcucuCg.....         |                                                                       | 59   | 1 | seq |
| .....ugggauaucucgggcucuCgu.....        |                                                                       | 9    | 1 | seq |
| .....ugggauaucucgggcucuCguc.....       |                                                                       | 4    | 1 | seq |
| .....ugggauaucucgggcucuCgucacga.....   |                                                                       | 1    | 1 | seq |
| .....gggauaucucgggcucuuug.....         |                                                                       | 13   | 0 | seq |
| .....gggauaucucgggcCcuug.....          |                                                                       | 1    | 1 | seq |
| .....gggauaucucgggcucUAg.....          |                                                                       | 3    | 1 | seq |
| .....gggauaucucgggcucUAug.....         |                                                                       | 1    | 1 | seq |
| .....gggauaucucgggcucuCg.....          |                                                                       | 2788 | 1 | seq |
| .....gggauaucucgggcucuuugu.....        |                                                                       | 1    | 0 | seq |
| .....gggauaucucgggcucuCgu.....         |                                                                       | 793  | 1 | seq |
| .....gggauaucucgggcucuCgu.....         |                                                                       | 1    | 1 | seq |
| .....gggauaucucgggcucuuuguU.....       |                                                                       | 1    | 1 | seq |
| .....gggauaucucgggcucuCguc.....        |                                                                       | 205  | 1 | seq |
| .....gggauaucucgggcucuuuguUa.....      |                                                                       | 1    | 1 | seq |
| .....gggauaucucgggcucuCguca.....       |                                                                       | 3    | 1 | seq |
| .....gggauaucucgggcucuCgucacga.....    |                                                                       | 1    | 1 | seq |
| .....gggauaucucgggcucuuuguUacgau.....  |                                                                       | 1    | 1 | seq |
| .....gggauaucucgggcucuCgucacgauga..... |                                                                       | 1    | 1 | seq |
| .....gauaucucgggcucuuugC.....          |                                                                       | 2    | 1 | seq |
| .....gauaucucgggcucuCgu.....           |                                                                       | 3182 | 1 | seq |
| .....gauaucucgggcucUAgu.....           |                                                                       | 2    | 1 | seq |
| .....gauaucucgggcucuuugu.....          |                                                                       | 4    | 0 | seq |
| .....gauaucucgggcucuuuguG.....         |                                                                       | 1    | 1 | seq |
| .....gauaucucgggcucuCguc.....          |                                                                       | 1148 | 1 | seq |
| .....gauaucucgggcucuuuguc.....         |                                                                       | 2    | 0 | seq |
| .....gauaucucgggcucuuuguU.....         |                                                                       | 7    | 1 | seq |
| .....gauaucucgggcucuCguca.....         |                                                                       | 7    | 1 | seq |
| .....gauaucucgggcucuuuguUa.....        |                                                                       | 1    | 1 | seq |
| .....gauaucucgggcucuCgucacg.....       |                                                                       | 5    | 1 | seq |
| .....gauaucucgggcucuuuguUacg.....      |                                                                       | 6    | 1 | seq |
| .....gauaucucgggcucuuuguUacgau.....    |                                                                       | 1    | 1 | seq |
| .....gauaucucgggcucuCgucacgau.....     |                                                                       | 4    | 1 | seq |
| .....gauaucucgggcucuuuguUacgaug.....   |                                                                       | 4    | 1 | seq |
| .....gauaucucgggcucuCgucacgaug.....    |                                                                       | 3    | 1 | seq |
| .....gauaucucgggcucuCgucacgauga.....   |                                                                       | 1    | 1 | seq |
| .....auaucucgggcucuCguc.....           |                                                                       | 1045 | 1 | seq |
| .....auaucucgggcucuuuguU.....          |                                                                       | 7    | 1 | seq |
| .....auaucucgggcucuuuguc.....          |                                                                       | 1    | 0 | seq |
| .....auaucucgggcucuCguca.....          |                                                                       | 6    | 1 | seq |
| .....auaucucgggcucuuuguUac.....        |                                                                       | 1    | 1 | seq |
| .....auaucucgggcucuCgucacg.....        |                                                                       | 4    | 1 | seq |
| .....auaucucgggcucuuuguUacg.....       |                                                                       | 7    | 1 | seq |
| .....auaucucgggcucuuuguUacga.....      |                                                                       | 3    | 1 | seq |
| .....auaucucgggcucuCgucacga.....       |                                                                       | 4    | 1 | seq |
| .....auaucucgggcucuCgucacgau.....      |                                                                       | 2    | 1 | seq |
| .....auaucucgggcucuCgucacgaug.....     |                                                                       | 9    | 1 | seq |
| .....auaucucgggcucuuuguUacgaug.....    |                                                                       | 3    | 1 | seq |
| .....uauaucucgggcucuuuguUa.....        |                                                                       | 6    | 1 | seq |
| .....uauaucucgggcucuCguca.....         |                                                                       | 50   | 1 | seq |
| .....uauaucucgggcucuCgucacg.....       |                                                                       | 22   | 1 | seq |
| .....uauaucucgggcucuuuguUacg.....      |                                                                       | 23   | 1 | seq |
| .....uauaucucgggcucuCgucacga.....      |                                                                       | 13   | 1 | seq |
| .....uauaucucgggcucuuugucacgU.....     |                                                                       | 1    | 1 | seq |
| .....uauaucucgggcucuuuguUacga.....     |                                                                       | 8    | 1 | seq |
| .....uauaucucgggcucuuuguUacgau.....    |                                                                       | 5    | 1 | seq |
| .....uauaucucgggcucuCgucacgau.....     |                                                                       | 9    | 1 | seq |
| .....uauaucucgggcucuCgucacgaug.....    |                                                                       | 33   | 1 | seq |
| .....uauaucucgggcucuuuguUacgaug.....   |                                                                       | 29   | 1 | seq |
| .....uauaucucgggcucuuuguUacgauga.....  |                                                                       | 9    | 1 | seq |
| .....uauaucucgggcucuCgucacgauga.....   |                                                                       | 9    | 1 | seq |
| .....aucucgggcucuuuguUac.....          |                                                                       | 1    | 1 | seq |
| .....aucucgggcucuCgucacg.....          |                                                                       | 2    | 1 | seq |

Star

ggguucgucaggaauugugaggaauugacucucgacaaug**gauaucucggcucuugucacgaugacgaauguagcgaaugca**auacuuaugugugaauugaagaauccc

|                                     |    |   |     |
|-------------------------------------|----|---|-----|
| .aucucgggcucuuguUacg.               | 1  | 1 | seq |
| .aucucgggcucuCgucacga.              | 5  | 1 | seq |
| .aucucgggcucuuguUacga.              | 1  | 1 | seq |
| .aucucgggcucuuguUacgau.             | 3  | 1 | seq |
| .aucucgggcucuCgucacgau.             | 2  | 1 | seq |
| .aucucgggcucuCgucacgaug.            | 6  | 1 | seq |
| .aucucgggcucuuguUacgaug.            | 2  | 1 | seq |
| .aucucgggcucuuguUacgauga.           | 1  | 1 | seq |
| .aucucgggcucuCgucacgauga.           | 1  | 1 | seq |
| .ucucgggcucuCgucacg.                | 23 | 1 | seq |
| .ucucgggcucuuguUacg.                | 32 | 1 | seq |
| .ucucgggcucuuguUacga.               | 5  | 1 | seq |
| .ucucgggcucuCgucacga.               | 8  | 1 | seq |
| .ucucgggcucuCgucacgau.              | 14 | 1 | seq |
| .ucucgggcucuuguUacgau.              | 9  | 1 | seq |
| .ucucgggcucuCgucacgaug.             | 45 | 1 | seq |
| .ucucgggcucuuguUacgaug.             | 29 | 1 | seq |
| .ucucgggcucuuguUacgauga.            | 5  | 1 | seq |
| .ucucgggcucuCgucacgauga.            | 12 | 1 | seq |
| .cucgggcucuuguUacga.                | 4  | 1 | seq |
| .cucgggcucuCgucacga.                | 5  | 1 | seq |
| .cucgggcucuCgucacgau.               | 13 | 1 | seq |
| .cucgggcucuuguUacgau.               | 9  | 1 | seq |
| .cucgggcucuCgucacgaug.              | 29 | 1 | seq |
| .cucgggcucuuguUacgaug.              | 32 | 1 | seq |
| .cucgggcucuCgucacgauga.             | 5  | 1 | seq |
| .cucgggcucuuguUacgauga.             | 8  | 1 | seq |
| .ucgggcucuuguUacgau.                | 2  | 1 | seq |
| .ucgggcucuCgucacgau.                | 2  | 1 | seq |
| .ucgggcucuCgucacgaug.               | 20 | 1 | seq |
| .ucgggcucuuguUacgaug.               | 16 | 1 | seq |
| .ucgggcucuCgucacgauga.              | 9  | 1 | seq |
| .ucgggcucuuguUacgauga.              | 10 | 1 | seq |
| .cgggcucuCgucacgaug.                | 16 | 1 | seq |
| .cgggcucuuguUacgaug.                | 18 | 1 | seq |
| .cgggcucuCgucacgauga.               | 7  | 1 | seq |
| .cgggcucuuguUacgauga.               | 3  | 1 | seq |
| .acgaugacgaaCguagc.                 | 1  | 1 | seq |
| .acgaugaAgaauaguagc.                | 2  | 1 | seq |
| .acgaugaAgaauaguagcga.              | 3  | 1 | seq |
| .acgaugaAgaauaguagcgaa.             | 1  | 1 | seq |
| .acgaugaAgaauaguagcgaaa.            | 1  | 1 | seq |
| .acgaugaAgaauaguagcgaaaug.          | 1  | 1 | seq |
| .cgaugacgaaCguagcg.                 | 1  | 1 | seq |
| .cgaugaAgaauaguagcg.                | 4  | 1 | seq |
| .cgaugaAgaauaguagcga.               | 2  | 1 | seq |
| .cgaugaAgaauaguagcgaa.              | 6  | 1 | seq |
| .cgaugaAgaauaguagcgaaa.             | 4  | 1 | seq |
| .cgaugacgaaCguagcgaaa.              | 1  | 1 | seq |
| .cgaugacgaaCguagcgaaaau.            | 1  | 1 | seq |
| .cgaugaAgaauaguagcgaaaau.           | 3  | 1 | seq |
| .cgaugaAgaauaguagcgaaaug.           | 1  | 1 | seq |
| .cgaugaAgaauaguagcgaaaugc.          | 2  | 1 | seq |
| .gaugacgaaCguagcga.                 | 1  | 1 | seq |
| .augacgaaCguagcgaaaug.              | 1  | 1 | seq |
| .ugacgaaCguagcgaaa.                 | 1  | 1 | seq |
| .gacgaaCguagcgaaaau.                | 1  | 1 | seq |
| .gacgaaCguagcgaaaug.                | 1  | 1 | seq |
| .cgaaCguagcgaaaugc.                 | 1  | 1 | seq |
| .gaaCguagcgaaaugca.                 | 8  | 1 | seq |
| .gaaCguagcgaaaugc aa uacuu aguguga. | 1  | 1 | seq |
| .aaCguagcgaaaugc aa uacuu aguguga.  | 1  | 1 | seq |
| .auguagcgaaaugcGauacuu agugugaau.   | 1  | 1 | seq |
| .Cguagcgaaaugc aa uac.              | 1  | 1 | seq |
| .Cguagcgaaaugc aa uacuu aguguga.    | 1  | 1 | seq |
| .Cguagcgaaaugc aa uacuu aguguga.    | 2  | 1 | seq |
| .uguagcgaaaugcGauacuu agugugaau.    | 1  | 1 | seq |
| .Cguagcgaaaugc aa uacuu agugugaau.  | 1  | 1 | seq |
| .uguagcgaaaugcGauacuu agugugaauu.   | 1  | 1 | seq |
| .guagcgaaaugc aa uacuu aguguga.     | 1  | 0 | seq |

Star

|                                        |    |   |     |
|----------------------------------------|----|---|-----|
| ..uagcgaaaugcGauacuuagugugaauuga.....  | 3  | 1 | seq |
| ..agcgaaaugcGauacuuagug.....           | 1  | 0 | seq |
| ..agcgaaaugcGauacuuagugugaauuga.....   | 1  | 1 | seq |
| ..gcgaaaugcGauacuuagugugaau.....       | 1  | 0 | seq |
| ..gcgaaaugcGauacuuagugugaauuga.....    | 1  | 1 | seq |
| ..gcgaaaugcGauacuuagugugaauugCaga..... | 1  | 1 | seq |
| ..cgaaaugcGauacuuagugugaauuga.....     | 6  | 1 | seq |
| ..aaaugcGauacuuaguguga.....            | 1  | 0 | seq |
| ..aaaugcGauacuuagugugaau.....          | 1  | 0 | seq |
| ..aaugcGauacuuaguguga.....             | 1  | 0 | seq |
| ..augcGauacuuagugugaau.....            | 1  | 0 | seq |
| ..augcGauacuuagugugaauu.....           | 2  | 0 | seq |
| ..augcGauacuuagugugaauu.....           | 1  | 1 | seq |
| ..ugcGauacuuagugCga.....               | 1  | 1 | seq |
| ..ugcGauacuuaguguga.....               | 1  | 0 | seq |
| ..ugcGauacuuaguguga.....               | 7  | 0 | seq |
| ..ugcGauacuuagugugaau.....             | 3  | 0 | seq |
| ..ugcGauacuuagugugaau.....             | 1  | 1 | seq |
| ..ugcGauacuuagugugaauu.....            | 5  | 0 | seq |
| ..ugcGauacuuagugugaauu.....            | 1  | 1 | seq |
| ..gcaGauacuuagugugaG.....              | 1  | 1 | seq |
| ..gGauacuuaguguga.....                 | 1  | 1 | seq |
| ..gcaGauacuuagugugaau.....             | 1  | 0 | seq |
| ..gcaGauacuuagugugaauA.....            | 1  | 1 | seq |
| ..gcaGauacuuagugugaauu.....            | 4  | 0 | seq |
| ..gcGauacuuagugugaauu.....             | 1  | 1 | seq |
| ..caGauacuuagugugaauu.....             | 3  | 0 | seq |
| ..aaGauacuuagugugaauG.....             | 1  | 1 | seq |
| ..auGauacuuagugugaauug.....            | 17 | 0 | seq |
| ..auGauacuuagugugaauuga.....           | 15 | 0 | seq |
| ..auGauacuuagugugaauugG.....           | 2  | 1 | seq |
| ..auGauacuuagugugaauuCa.....           | 1  | 1 | seq |
| ..auGauacuuagugugaauugaaga.....        | 1  | 0 | seq |
| ..auGauacuuagugugaauugaGagaau.....     | 1  | 1 | seq |
| ..uGauacuuagugugaauuga.....            | 40 | 0 | seq |
| ..uGauacuuagCgugaauuga.....            | 1  | 1 | seq |
| ..uGauacuuagugugaauuCa.....            | 1  | 1 | seq |
| ..uGauacuuagugGauuga.....              | 1  | 1 | seq |
| ..uGauacuuagugCgugaauuga.....          | 1  | 1 | seq |
| ..uGauacuuagugugaauugG.....            | 3  | 1 | seq |
| ..uGauacuuagugugaauugGa.....           | 1  | 1 | seq |
| ..uGauacuuagugugaauugGaga.....         | 1  | 1 | seq |
| ..uGauacuuagugugaauugaagaau.....       | 1  | 0 | seq |
| ..acuuagugugaauugGaga.....             | 1  | 1 | seq |
| ..cuuagugugaauugaag.....               | 1  | 0 | seq |
| ..cuuagugugaauugGag.....               | 1  | 1 | seq |
| ..cuuagugugaauugGaga.....              | 1  | 1 | seq |
| ..cuuagugugaauugaaga.....              | 3  | 0 | seq |
| ..cuuagugugaauugaagaa.....             | 1  | 0 | seq |
| ..cuuagugugaauugGagaau.....            | 1  | 1 | seq |
| ..cuuagugugaauugaagaau.....            | 1  | 0 | seq |
| ..cuuagugugaauugaagaaucc.....          | 1  | 0 | seq |
| ..cuuagugugaauugaagaauccU.....         | 1  | 1 | seq |
| ..cuuagugugaauugGagaauccc.....         | 1  | 1 | seq |
| ..uuagugugaauugaaga.....               | 2  | 0 | seq |
| ..uagugugaauugGagaa.....               | 1  | 1 | seq |
| ..uagugugaauugaagaau.....              | 1  | 0 | seq |
| ..uagugugaauugaagaau.....              | 1  | 0 | seq |
| ..uagugugaauugGagaau.....              | 2  | 1 | seq |
| ..uagugugaauugaagaaucc.....            | 1  | 0 | seq |
| ..gugugaauugaagaau.....                | 2  | 0 | seq |
| ..gugugaauugGagaau.....                | 3  | 1 | seq |
| ..gugugaauugGagaaucc.....              | 2  | 1 | seq |
| ..gugugaauugaagaaucc.....              | 3  | 0 | seq |
| ..gugugaauugGagaauccc.....             | 3  | 1 | seq |
| ..ugugaauugaagaaucc.....               | 1  | 0 | seq |
| ..ugugaauugGagaaucc.....               | 1  | 1 | seq |
| ..ugugaauugaagaauccc.....              | 1  | 0 | seq |
| ..gugaauugGagaauccc.....               | 2  | 1 | seq |



5' **A** C A G G G A A G A G U A G G C C A U G G C A A U U G C A C A G G C A G A A A  
3' U C G U C C C U U C U C C U C A C G U A C U C U U A C C G U C U U G U C G C

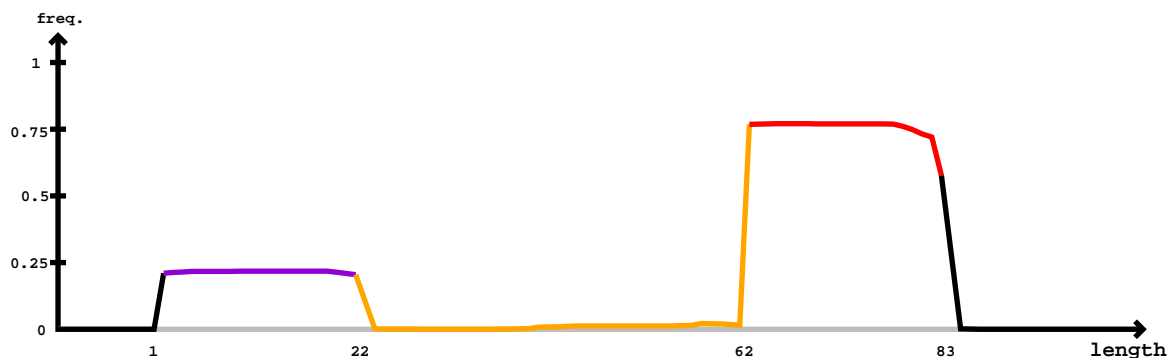

## Mature

[illegible]

## Star

## Mature

|                                                                                                                |     |   |     |
|----------------------------------------------------------------------------------------------------------------|-----|---|-----|
| cacagagagacaggggaagaguagggaugggaaauugcacaggcagaaacgucugcucucugccauucucaugcacugccucucuccuggcucacuuucuccuguuauau |     |   |     |
| .....acgucugcucucugcAauucuc.....                                                                               | 1   | 1 | seq |
| .....cgucugcucucugcAauucuc.....                                                                                | 1   | 1 | seq |
| .....gucugcucucugcAauucuc.....                                                                                 | 1   | 1 | seq |
| .....ucugcucucugcAauucuca.....                                                                                 | 1   | 1 | seq |
| .....ucugcucucgccauucucaug.....                                                                                | 1   | 0 | seq |
| .....cugcucucugcAauucuc.....                                                                                   | 1   | 1 | seq |
| .....cugcucucugcAauucuca.....                                                                                  | 1   | 1 | seq |
| .....auucucUugcacugccucucucc.....                                                                              | 1   | 1 | seq |
| .....auucucUugcacugccucucuccu.....                                                                             | 1   | 1 | seq |
| .....uucucaugcacugccucucucc.....                                                                               | 1   | 0 | seq |
| .....ucucUugcacugccucucucc.....                                                                                | 2   | 1 | seq |
| .....ucucaugcacCgcccucucucc.....                                                                               | 1   | 1 | seq |
| .....ucucaugcacugccucucucc.....                                                                                | 5   | 0 | seq |
| .....ucucaugcacugccucucuccU.....                                                                               | 1   | 1 | seq |
| .....cucaugcacugccucucucc.....                                                                                 | 1   | 0 | seq |
| .....cucaugcacugccucucuccu.....                                                                                | 1   | 0 | seq |
| .....Cugcacugccucucuccuggc.....                                                                                | 1   | 1 | seq |
| .....ugcacugccucucucccC.....                                                                                   | 2   | 1 | seq |
| .....ugcacugccucucuccu.....                                                                                    | 12  | 0 | seq |
| .....ugcacugccucucuccuU.....                                                                                   | 1   | 1 | seq |
| .....ugcacugccucucuccuug.....                                                                                  | 16  | 0 | seq |
| .....ugcacugccucucuccuC.....                                                                                   | 1   | 1 | seq |
| .....ugcacugccucucuccuA.....                                                                                   | 1   | 1 | seq |
| .....ugcacugccucucucccAg.....                                                                                  | 1   | 1 | seq |
| .....ugcacugccucucucccugg.....                                                                                 | 8   | 0 | seq |
| .....ugcacugccucucucccugA.....                                                                                 | 1   | 1 | seq |
| .....ugcacugccucucucccugU.....                                                                                 | 5   | 1 | seq |
| .....Ggcacugccucucucccugg.....                                                                                 | 1   | 1 | seq |
| .....ugcacugccucucucccuggU.....                                                                                | 21  | 1 | seq |
| .....ugcacugccucucucccugCc.....                                                                                | 1   | 1 | seq |
| .....ugcacugccCcuucccuggc.....                                                                                 | 1   | 1 | seq |
| .....Agcacugccucucucccuggc.....                                                                                | 1   | 1 | seq |
| .....ugcacugccucucucccugA.....                                                                                 | 3   | 1 | seq |
| .....ugUacugccucucucccuggc.....                                                                                | 1   | 1 | seq |
| .....ugcacugccucucucccuggc.....                                                                                | 155 | 0 | seq |
| .....ugcacugccucucucccAagcu.....                                                                               | 2   | 1 | seq |
| .....ugcacugccucucucccugUcu.....                                                                               | 1   | 1 | seq |
| .....ugcacuCcucucucccuggcu.....                                                                                | 1   | 1 | seq |
| .....ugcaGugccucucucccuggcu.....                                                                               | 1   | 1 | seq |
| .....ugcacugccuGuucccuggcu.....                                                                                | 1   | 1 | seq |
| .....ugUacugccucucucccuggcu.....                                                                               | 1   | 1 | seq |
| .....ugcacugccucucucccuggGu.....                                                                               | 1   | 1 | seq |
| .....ugcacugccucucucccuggcu.....                                                                               | 538 | 0 | seq |
| .....ugcacugccCcuucccuggcu.....                                                                                | 5   | 1 | seq |
| .....ugcacugccucucucccugAcu.....                                                                               | 4   | 1 | seq |
| .....ugcacugcGuucucccuggcu.....                                                                                | 2   | 1 | seq |
| .....ugcacugccucucucccAggc.....                                                                                | 1   | 1 | seq |
| .....ugcacugccucucucccuggcA.....                                                                               | 29  | 1 | seq |
| .....ugcacugccucucucccuggcG.....                                                                               | 26  | 1 | seq |
| .....ugcacugccucucucccuggcC.....                                                                               | 104 | 1 | seq |
| .....ugcacugccucucucccCggcu.....                                                                               | 3   | 1 | seq |
| .....uUcacugccucucucccuggcu.....                                                                               | 1   | 1 | seq |
| .....ugcGcugccucucucccuggcu.....                                                                               | 1   | 1 | seq |
| .....Cgcacugccucucucccuggcu.....                                                                               | 4   | 1 | seq |
| .....ugcacCgcccucucucccuggcu.....                                                                              | 1   | 1 | seq |
| .....ugcacugccucCucccuggcu.....                                                                                | 4   | 1 | seq |
| .....ugcacugccucucucccuggcuc.....                                                                              | 3   | 0 | seq |
| .....ugcacugccucucucccuggcuA.....                                                                              | 3   | 1 | seq |
| .....ugcacugccucucucccuggcuU.....                                                                              | 7   | 1 | seq |
| .....ugcacugccucucucccuggcuca.....                                                                             | 1   | 0 | seq |
| .....ugcacugccucucucccuggcuUac.....                                                                            | 1   | 1 | seq |
| .....gcacugccucucucccug.....                                                                                   | 1   | 0 | seq |
| .....cacugccucucucccuggc.....                                                                                  | 2   | 0 | seq |
| .....acugccucucucccuggc.....                                                                                   | 1   | 0 | seq |

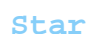

| 5'-                                                                                                                                                |       | -3' | exp    |  |
|----------------------------------------------------------------------------------------------------------------------------------------------------|-------|-----|--------|--|
| .(((((((.((((.((((.(.(.((((((.(((((((.....))))))))...)))))))..).).)).)).)).)).)).).(((.....)))                                                     | reads | mm  | sample |  |
| uuugggugcag <u>uugaauucua</u> gagguag <u>ugugugggugagagucaaaaauagugu</u> gacucgcagaucaca <u>uuugaggguagaauaagug</u> acacacaa <u>cugggaggggucuc</u> | 10    | 1   | seq    |  |
| .....uuGggaggguaga <u>aauaag</u> .....                                                                                                             | 1     | 1   | seq    |  |
| .....Cuuggaggguaga <u>aauaagu</u> .....                                                                                                            | 10    | 1   | seq    |  |
| .....uuGggaggguaga <u>aauaagu</u> .....                                                                                                            | 13    | 1   | seq    |  |
| .....uuGggaggguaga <u>aauaagug</u> .....                                                                                                           | 18    | 1   | seq    |  |
| .....uGggaggguaga <u>aauaag</u> .....                                                                                                              | 22    | 1   | seq    |  |
| .....uGggaggguaga <u>aauaagug</u> .....                                                                                                            | 19    | 1   | seq    |  |
| .....uGggaggguaga <u>aauaaguga</u> .....                                                                                                           | 1     | 1   | seq    |  |
| .....Nggaggguaga <u>aauaag</u> .....                                                                                                               | 2     | 1   | seq    |  |
| .....Gggaggguaga <u>aauaag</u> .....                                                                                                               | 7     | 1   | seq    |  |
| .....uUgaggguaga <u>aauaag</u> .....                                                                                                               | 1     | 1   | seq    |  |
| .....uggaggguaga <u>aauaagu</u> .....                                                                                                              | 1     | 0   | seq    |  |
| .....uUgaggguaga <u>aauaagu</u> .....                                                                                                              | 2     | 1   | seq    |  |
| .....Gggaggguaga <u>aauaagu</u> .....                                                                                                              | 9     | 1   | seq    |  |
| .....Gggaggguaga <u>aauaagug</u> .....                                                                                                             | 11    | 1   | seq    |  |
| .....uUgaggguaga <u>aauaagug</u> .....                                                                                                             | 2     | 1   | seq    |  |
| .....Gggaggguaga <u>aauaaguga</u> .....                                                                                                            | 2     | 1   | seq    |  |
| .....Ugaggguaga <u>aauaagu</u> .....                                                                                                               | 4     | 1   | seq    |  |
| .....ggaggguaga <u>aauaagC</u> .....                                                                                                               | 2     | 1   | seq    |  |
| .....ggGgguguaga <u>aauaagu</u> .....                                                                                                              | 1     | 1   | seq    |  |
| .....Cgaggguaga <u>aauaagu</u> .....                                                                                                               | 1     | 1   | seq    |  |
| .....ggaggguaga <u>aauaagu</u> .....                                                                                                               | 17    | 0   | seq    |  |
| .....Ngaggguaga <u>aauaagu</u> .....                                                                                                               | 3     | 1   | seq    |  |
| .....Ugaggguaga <u>aauaagug</u> .....                                                                                                              | 6     | 1   | seq    |  |
| .....ggaggguaga <u>aauaagug</u> .....                                                                                                              | 12    | 0   | seq    |  |
| .....Ngaggguaga <u>aauaagug</u> .....                                                                                                              | 7     | 1   | seq    |  |
| .....Cgaggguaga <u>aauaagug</u> .....                                                                                                              | 2     | 1   | seq    |  |
| .....ggaggguaga <u>aauaagugG</u> .....                                                                                                             | 3     | 1   | seq    |  |
| .....Agaggguaga <u>aauaagugaca</u> .....                                                                                                           | 1     | 1   | seq    |  |
| .....gaggCGuaga <u>aauaagug</u> .....                                                                                                              | 32    | 1   | seq    |  |
| .....gaggguGga <u>aauaagug</u> .....                                                                                                               | 20    | 1   | seq    |  |
| .....gaggguagaG <u>aauaagug</u> .....                                                                                                              | 2     | 1   | seq    |  |
| .....gaggguagaG <u>aauaagug</u> .....                                                                                                              | 27    | 1   | seq    |  |
| .....gaggguagaG <u>aauaagug</u> .....                                                                                                              | 2     | 1   | seq    |  |

## Star

## Mature

|                                                                                                                 |      |   |     |
|-----------------------------------------------------------------------------------------------------------------|------|---|-----|
| uuugggugcaguuugaauucuaagaguuaguguggugagagucaaaaaagugugacucgagauccacauuuuggaggugugaauaagugacacacaacugggaggggucuc |      |   |     |
| .....gaggAguagaauaagug.....                                                                                     | 6    | 1 | seq |
| .....Caggguagaauaagug.....                                                                                      | 5    | 1 | seq |
| .....gaggguagaauaaUug.....                                                                                      | 4    | 1 | seq |
| .....gaggugAagaauaagug.....                                                                                     | 2    | 1 | seq |
| .....gaggugCagaauaagug.....                                                                                     | 18   | 1 | seq |
| .....gaggguagaauaagGg.....                                                                                      | 31   | 1 | seq |
| .....gaggguuUgaauaagug.....                                                                                     | 7    | 1 | seq |
| .....gaggguagaauaaguC.....                                                                                      | 28   | 1 | seq |
| .....gaCgguguagaauaagug.....                                                                                    | 1    | 1 | seq |
| .....gaggguuCGaauaagug.....                                                                                     | 1    | 1 | seq |
| .....gaggguuagCauaagug.....                                                                                     | 1    | 1 | seq |
| .....gaggguagaauaagug.....                                                                                      | 9116 | 0 | seq |
| .....Naggguagaauaagug.....                                                                                      | 13   | 1 | seq |
| .....gaggguCuaagaauaagug.....                                                                                   | 1    | 1 | seq |
| .....gUgguguagaauaagug.....                                                                                     | 6    | 1 | seq |
| .....gaggguAuaagaauaagug.....                                                                                   | 5    | 1 | seq |
| .....gaggguGagaauaagug.....                                                                                     | 4    | 1 | seq |
| .....gGgguguagaauaagug.....                                                                                     | 26   | 1 | seq |
| .....gaggguagaauaaAag.....                                                                                      | 4    | 1 | seq |
| .....gaggguuagGauaaguga.....                                                                                    | 1    | 1 | seq |
| .....gaggguagaauaGguga.....                                                                                     | 2    | 1 | seq |
| .....gaggguagaauaaguga.....                                                                                     | 182  | 0 | seq |
| .....gaggguagaauaagugC.....                                                                                     | 24   | 1 | seq |
| .....gGgguguagaauaaguga.....                                                                                    | 1    | 1 | seq |
| .....gaAguagaauaaguga.....                                                                                      | 2    | 1 | seq |
| .....Uaggguagaauaaguga.....                                                                                     | 1    | 1 | seq |
| .....gaggguagaauAaaguga.....                                                                                    | 1    | 1 | seq |
| .....gaggguagaauaagugGc.....                                                                                    | 41   | 1 | seq |
| .....gaggguagaauaagugGca.....                                                                                   | 16   | 1 | seq |
| .....gaggguagaauaagugaca.....                                                                                   | 1    | 0 | seq |
| .....aggguagaaCaaguga.....                                                                                      | 1    | 1 | seq |
| .....aggguagaauaaguga.....                                                                                      | 100  | 0 | seq |
| .....aggguagaauaagugC.....                                                                                      | 15   | 1 | seq |
| .....aUguguagaauaaguga.....                                                                                     | 1    | 1 | seq |
| .....aggguagaauaGguga.....                                                                                      | 2    | 1 | seq |
| .....Ggguguagaauaaguga.....                                                                                     | 1    | 1 | seq |
| .....aggguagaauaaguAa.....                                                                                      | 1    | 1 | seq |
| .....aggguagaauaaguUa.....                                                                                      | 1    | 1 | seq |
| .....aggguagaauaagugGc.....                                                                                     | 22   | 1 | seq |
| .....aggguagaauaagugGca.....                                                                                    | 19   | 1 | seq |
| .....aggguagaauaagugaAa.....                                                                                    | 1    | 1 | seq |
| .....gguguagaauaagugGc.....                                                                                     | 10   | 1 | seq |
| .....gguguagaauaagugCc.....                                                                                     | 1    | 1 | seq |
| .....gguguagaauaagugGca.....                                                                                    | 8    | 1 | seq |
| .....gguguagaauaagugaca.....                                                                                    | 2    | 0 | seq |
| .....guguagaauaagugGca.....                                                                                     | 14   | 1 | seq |

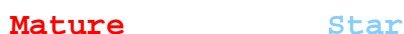

|    |                                                                                                                                                           |       |           |
|----|-----------------------------------------------------------------------------------------------------------------------------------------------------------|-------|-----------|
| 5' | aauuugaaugugauuugga <u>agaauugggagcucuucc</u> aa <u>agugccaugug</u> <u>agaugcauaucuaaggguuguc</u> caugagucacuaauugu <sup>-3'</sup> aaagugauucaacacuaaaexp |       |           |
|    | .(((.(((((((.(((.(((.(((.(((.))))).)))).)))..))))).(((((((.....)))))))).))....                                                                            | reads | mm sample |
|    | ...gauuuggauagauuUgg.....                                                                                                                                 | 1     | 1 seq     |
|    | ...gaCagaauugggagcucu.....                                                                                                                                | 72    | 1 seq     |
|    | ...gaCagaauugggagcucu.....                                                                                                                                | 27    | 1 seq     |
|    | ...gaCagaauugggagcucuu.....                                                                                                                               | 38    | 1 seq     |
|    | ...gaCagaauugggagcucuucc.....                                                                                                                             | 63    | 1 seq     |
|    | ...gaCagaauugggagcucuucc.....                                                                                                                             | 12    | 1 seq     |
|    | ...gauagauugAgagcucuucc.....                                                                                                                              | 2     | 1 seq     |
|    | ...aCagaauugggagcucu.....                                                                                                                                 | 25    | 1 seq     |
|    | ...aCagaauugggagcucu.....                                                                                                                                 | 28    | 1 seq     |
|    | ...aCagaauugggagcucuucc.....                                                                                                                              | 44    | 1 seq     |
|    | ...aCagaauugggagcucuucc.....                                                                                                                              | 1     | 1 seq     |
|    | ...auagauugAgagcucuucc.....                                                                                                                               | 1     | 1 seq     |
|    | ...Cagaauugggagcucu.....                                                                                                                                  | 49    | 1 seq     |
|    | ...Cagaauugggagcucuucc.....                                                                                                                               | 100   | 1 seq     |
|    | ...Cagaauugggagcucuucc.....                                                                                                                               | 4     | 1 seq     |
|    | ...uagauugAgagcucuucc.....                                                                                                                                | 2     | 1 seq     |
|    | ...agauugUgagcucuucc.....                                                                                                                                 | 1     | 1 seq     |
|    | ...agaauugggagcucuucc.....                                                                                                                                | 21    | 0 seq     |
|    | ...agaauugggagcucuucc.....                                                                                                                                | 4     | 0 seq     |
|    | ...agaauugCgagcucuucc.....                                                                                                                                | 1     | 1 seq     |
|    | ...agaauugggagcucuuccA.....                                                                                                                               | 1     | 1 seq     |
|    | ...agaauugAgagcucuucca.....                                                                                                                               | 1     | 1 seq     |
|    | ...gauugggagcucuucc.....                                                                                                                                  | 2     | 0 seq     |
|    | ...auugAgagcucuucca.....                                                                                                                                  | 1     | 1 seq     |
|    | ...agugAcaugugaagaug.....                                                                                                                                 | 1     | 1 seq     |

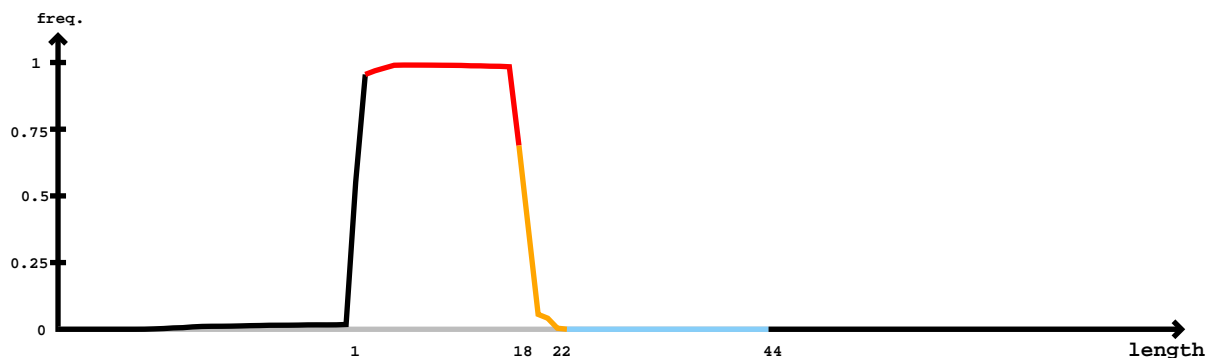[illegible]

# Mature Star

acuucauaguuagcgugcuugggcuaguguaguaucugggaugggugaccacccgagaaguccuaguuuuuacaugccuauaggcauuuuuuaaacuuaguccaauuuuauccac

|                                                |    |   |     |
|------------------------------------------------|----|---|-----|
| .....agcgCgcuuugggcuagug.....                  | 7  | 1 | seq |
| .....agcgCgcuuugggcuagugu.....                 | 6  | 1 | seq |
| .....agcgCgcuuugggcuagugua.....                | 5  | 1 | seq |
| .....agcgCgcuuugggcuaguguag.....               | 3  | 1 | seq |
| .....agcgCgcuuugggcuaguguagu.....              | 1  | 1 | seq |
| .....agcgCgcuuugggcuaguguaguacug.....          | 1  | 1 | seq |
| .....agcgGgcuuugggcuaguguaguacuggga.....       | 1  | 1 | seq |
| .....agcgCgcuuugggcuaguguaguacugggaug.....     | 1  | 1 | seq |
| .....agcgCgcuuugggcuaguguaguacuggggauggu.....  | 2  | 1 | seq |
| .....gcgCgcuuugggcuagug.....                   | 13 | 1 | seq |
| .....gcgCgcuuugggcuagugu.....                  | 4  | 1 | seq |
| .....gcgCgcuuugggcuagugua.....                 | 2  | 1 | seq |
| .....gcgCgcuuugggcuaguguag.....                | 1  | 1 | seq |
| .....gcgugcuuugggcuagGguag.....                | 1  | 1 | seq |
| .....gcgCgcuuugggcuaguguagu.....               | 1  | 1 | seq |
| .....gcgCgcuuugggcuaguguaguua.....             | 1  | 1 | seq |
| .....gcgCgcuuugggcuaguguaguacu.....            | 2  | 1 | seq |
| .....gcgCgcuuugggcuaguguaguacug.....           | 1  | 1 | seq |
| .....gcgCgcuuugggcuaguguaguacuggg.....         | 1  | 1 | seq |
| .....gcgCgcuuugggcuaguguaguacugggga.....       | 1  | 1 | seq |
| .....gcgCgcuuugggcuaguguaguacuggggaug.....     | 1  | 1 | seq |
| .....gcgCgcuuugggcuaguguaguacuggggaugg.....    | 1  | 1 | seq |
| .....gcgCgcuuugggcuaguguaguacuggggauggg.....   | 1  | 1 | seq |
| .....gcgCgcuuugggcuaguguaguacuggggaugggug..... | 4  | 1 | seq |
| .....cgugcuuugggcuagGguaguacug.....            | 1  | 1 | seq |
| .....cgCgcuuugggcuaguguaguacugggga.....        | 3  | 1 | seq |
| .....cgCgcuuugggcuaguguaguacuggggaug.....      | 3  | 1 | seq |
| .....cgCgcuuugggcuaguguaguacuggggaugg.....     | 1  | 1 | seq |
| .....cgCgcuuugggcuaguguaguacuggggauggg.....    | 3  | 1 | seq |
| .....cgCgcuuugggcuaguguaguacuggggaugggug.....  | 4  | 1 | seq |
| .....gCgcuuugggcuaguguaguacuggggauggggu.....   | 1  | 1 | seq |
| .....Cgcuuugggcuaguguaguacugggga.....          | 3  | 1 | seq |
| .....ugcuuugggcuagGguaguacuggggaug.....        | 1  | 1 | seq |
| .....Cgcuuugggcuaguguaguacuggggaug.....        | 1  | 1 | seq |
| .....Cgcuuugggcuaguguaguacuggggauggg.....      | 1  | 1 | seq |
| .....Cgcuuugggcuaguguaguacuggggauggggu.....    | 2  | 1 | seq |
| .....Cgcuuugggcuaguguaguacuggggaugggugac.....  | 1  | 1 | seq |
| .....gcuuugggUuaguguaguua.....                 | 1  | 1 | seq |
| .....gcuuugggcuaguguaguacuA.....               | 1  | 1 | seq |
| .....gcuuugggcuaguguaguacuggg.....             | 1  | 0 | seq |
| .....gcuuugggcuagCGuaguacuggg.....             | 1  | 1 | seq |
| .....gcuuugggcuaguguaguacugggga.....           | 2  | 0 | seq |
| .....gcuuugggCaguguaguacugggga.....            | 2  | 1 | seq |
| .....gcuuugggcuaguguaguacuggggaC.....          | 1  | 1 | seq |
| .....gcuuugggcuaguguaguacuggggaug.....         | 7  | 0 | seq |
| .....gcuuugggcuagCGuaguacuggggaug.....         | 1  | 1 | seq |
| .....gcuuugggcuaguguaguacuggggauggg.....       | 1  | 0 | seq |
| .....gcuuugggcuagAguaguacuggggaugggugacca..... | 1  | 1 | seq |
| .....cuuugggcuaguguaguua.....                  | 1  | 0 | seq |
| .....cuuugggcuaguguaguacug.....                | 2  | 0 | seq |
| .....cuuugggcuaguguaguacugg.....               | 1  | 0 | seq |
| .....cuuugggcuaguguaguacuggg.....              | 2  | 0 | seq |
| .....cuuugggcuaguguaguacugggga.....            | 1  | 0 | seq |
| .....cuuugggcuagCGuaguacugggga.....            | 2  | 1 | seq |
| .....cuuugggcuagCGuaguacuggggaug.....          | 1  | 1 | seq |
| .....cuuugggcuaguguaguacuggggaug.....          | 3  | 0 | seq |
| .....cuuugggcuaguguaguacuggggaugg.....         | 1  | 0 | seq |
| .....cuuugggcuagCGuaguacuggggaugg.....         | 1  | 1 | seq |
| .....cuuugggcuaguguaguacuggggauggg.....        | 2  | 0 | seq |
| .....cuuugggcuaguguaguacuggggauggggu.....      | 2  | 0 | seq |
| .....cuuugggcuaguguaguacuggggaugggGC.....      | 1  | 1 | seq |
| .....cuuugggcuagCGuaguacuggggaugggug.....      | 1  | 1 | seq |
| .....uuugggcuaguguaguac.....                   | 1  | 0 | seq |
| .....uuugggcuagCGuaguacu.....                  | 1  | 1 | seq |
| .....uuugggcuaguguaguacu.....                  | 1  | 0 | seq |
| .....uuugggcuagCGuaguacug.....                 | 1  | 1 | seq |
| .....uuugggcuaguguaguacuugg.....               | 3  | 0 | seq |
| .....uuugggcuaguguaguacuuggga.....             | 1  | 0 | seq |
| .....uuugggcuaguguaguacuuggggaug.....          | 1  | 0 | seq |

# Mature Star

acuucauaguuagcgugcuugggcuaguguaguacugggagugggaccacccgagaaguccuaguuuuuacaugccuagugcauuuuuuaaacuuaguccaauuuauccac

|                                                    |      |   |     |
|----------------------------------------------------|------|---|-----|
| .....uugggcuagugua <u>guacugggaguggg</u> u.....    | 1    | 0 | seq |
| .....uugggcuagugua <u>guacugggaguggg</u> ug.....   | 2    | 0 | seq |
| .....uugggcuagugua <u>guacu</u> .....              | 1    | 0 | seq |
| .....uugggcuagugua <u>guacug</u> .....             | 3    | 0 | seq |
| .....uugggcuagugua <u>guacugg</u> .....            | 1    | 0 | seq |
| .....uugggcuagugua <u>guacuggga</u> .....          | 2    | 0 | seq |
| .....uugggcuagugua <u>guacugggauA</u> .....        | 1    | 1 | seq |
| .....uugggcuagugua <u>guacuggggag</u> .....        | 2    | 0 | seq |
| .....uugggcuagugua <u>guacuggggaggg</u> .....      | 1    | 0 | seq |
| .....uugggcuagugua <u>guacuggggagggU</u> .....     | 1    | 1 | seq |
| .....uugggcuagugua <u>guacuggggagggg</u> .....     | 4    | 0 | seq |
| .....uugggcuagugua <u>guacuggggaggggu</u> .....    | 3    | 0 | seq |
| .....uugggcuagugua <u>guacuggggaggggG</u> .....    | 1    | 1 | seq |
| .....uugggcuagC <u>guaguacuggggaggggu</u> .....    | 1    | 1 | seq |
| .....uugggcuagugua <u>guacuggggaggggug</u> .....   | 1    | 0 | seq |
| .....gggcuagugua <u>guacuggggaggggC</u> .....      | 1    | 1 | seq |
| .....ggcuagugua <u>guacugg</u> .....               | 1    | 0 | seq |
| .....ggcuagugua <u>guacuggga</u> .....             | 1    | 0 | seq |
| .....ggcuagugua <u>guacuggggaggggu</u> .....       | 1    | 0 | seq |
| .....gcuagugua <u>guacuggg</u> .....               | 1    | 0 | seq |
| .....gcuagugua <u>guacugCGa</u> .....              | 1    | 1 | seq |
| .....gcuagugua <u>guacCGggga</u> .....             | 1    | 1 | seq |
| .....gcuagugua <u>guacugggga</u> .....             | 5    | 0 | seq |
| .....gcuagugua <u>guacuggggag</u> .....            | 2    | 0 | seq |
| .....cuagugua <u>guacugggga</u> .....              | 5    | 0 | seq |
| .....cuagugua <u>guacuggggaC</u> .....             | 2    | 1 | seq |
| .....cGagugua <u>guacuggggag</u> .....             | 1    | 1 | seq |
| .....cuagugua <u>guacuggggag</u> .....             | 2    | 0 | seq |
| .....cuagugua <u>guacuggggagA</u> .....            | 1    | 1 | seq |
| .....cuagugua <u>guacuggggaggg</u> .....           | 1    | 0 | seq |
| .....cuagugua <u>guacuggggaggggu</u> .....         | 4    | 0 | seq |
| .....cuagugua <u>guacuggggaggggug</u> .....        | 1    | 0 | seq |
| .....cuagugua <u>guacuggggaggggugaccUccc</u> ..... | 1    | 1 | seq |
| .....uagugua <u>guacuggggagggg</u> .....           | 2    | 0 | seq |
| .....agu <u>guaguacuggggag</u> .....               | 1    | 0 | seq |
| .....agu <u>guaguacuggggaggg</u> .....             | 1    | 0 | seq |
| .....aU <u>uguaguacuggggaggggu</u> .....           | 2    | 1 | seq |
| .....agu <u>guaguacuggggaggggu</u> .....           | 1    | 0 | seq |
| .....G <u>uguaguacuggggaggggu</u> .....            | 1    | 1 | seq |
| .....g <u>uguaguacuggggagA</u> .....               | 1    | 1 | seq |
| .....C <u>uguaguacuggggaggg</u> .....              | 1    | 1 | seq |
| .....g <u>uguaguGcuggggaggg</u> .....              | 1    | 1 | seq |
| .....g <u>uguaguacuggggagggg</u> .....             | 1    | 0 | seq |
| .....g <u>uguaguacuggggaggggu</u> .....            | 1    | 0 | seq |
| .....g <u>uguaguacuggggaggggC</u> .....            | 1    | 1 | seq |
| .....g <u>uguaguacuggggaggggug</u> .....           | 2    | 0 | seq |
| .....u <u>guaguacuggggagggA</u> .....              | 1    | 1 | seq |
| .....u <u>Cuaguacuggggagggg</u> .....              | 1    | 1 | seq |
| .....u <u>guaguacuggggagggg</u> .....              | 7    | 0 | seq |
| .....N <u>guaguacuggggagggg</u> .....              | 6    | 1 | seq |
| .....u <u>guaguacugggGuggg</u> .....               | 1    | 1 | seq |
| .....u <u>guaguacuggggaggggu</u> .....             | 4    | 0 | seq |
| .....N <u>guaguacuggggaggggu</u> .....             | 6    | 1 | seq |
| .....u <u>Cuaguacuggggaggggu</u> .....             | 1    | 1 | seq |
| .....N <u>guaguacuggggaggggug</u> .....            | 4    | 1 | seq |
| .....u <u>guaguacuggggaggggug</u> .....            | 1    | 0 | seq |
| .....u <u>Cuaguacuggggaggggug</u> .....            | 1    | 1 | seq |
| .....N <u>uaguacuggggaggggu</u> .....              | 13   | 1 | seq |
| .....g <u>uaguacuggggaggggu</u> .....              | 6541 | 0 | seq |
| .....g <u>uaguacuggggaggggGg</u> .....             | 41   | 1 | seq |
| .....g <u>uaguacuggggaggggug</u> .....             | 4915 | 0 | seq |
| .....N <u>uaguacuggggaggggug</u> .....             | 4    | 1 | seq |
| .....g <u>uaguacuggggaggggGga</u> .....            | 1    | 1 | seq |
| .....g <u>uaguacuggggaggggugC</u> .....            | 1    | 1 | seq |
| .....g <u>uaguacuggggagggguga</u> .....            | 230  | 0 | seq |
| .....g <u>uaguacuggggaggggugac</u> .....           | 110  | 0 | seq |
| .....g <u>uaguacuggggaggggugCc</u> .....           | 1    | 1 | seq |
| .....g <u>uaguacuggggaggggugacc</u> .....          | 169  | 0 | seq |
| .....g <u>uaguacuggggaggggugacca</u> .....         | 5    | 0 | seq |
| .....u <u>aguacuggggaggggGg</u> .....              | 82   | 1 | seq |



# Mature Star

|                                                                                                                             |      |   |     |
|-----------------------------------------------------------------------------------------------------------------------------|------|---|-----|
| acuucauaguuagcgugcuugggcuagugua <u>guacuggggaugggugacca</u> ccccgagaaguccuaguuuuuacaugccuauaggcauuuuauaaacuaguccauuuuauccac |      |   |     |
| .....uaguacuggggaugggug.....                                                                                                | 8377 | 0 | seq |
| .....Naguacuggggaugggug.....                                                                                                | 14   | 1 | seq |
| .....uaguacuggggaugggugC.....                                                                                               | 1    | 1 | seq |
| .....uaguacuggggauggguga.....                                                                                               | 281  | 0 | seq |
| .....Naguacuggggaugggugac.....                                                                                              | 1    | 1 | seq |
| .....uaguacuggggaugggugac.....                                                                                              | 84   | 0 | seq |
| .....Naguacuggggaugggugacc.....                                                                                             | 1    | 1 | seq |
| .....uaguacuggggaugggugacc.....                                                                                             | 179  | 0 | seq |
| .....Gaguacuggggaugggugacc.....                                                                                             | 1    | 1 | seq |
| .....uaguacuggggaugggugacca.....                                                                                            | 18   | 0 | seq |
| .....aguacuggggaugggGga.....                                                                                                | 3    | 1 | seq |
| .....aguacuggggauggguga.....                                                                                                | 157  | 0 | seq |
| .....aguacuggggaugggugC.....                                                                                                | 1    | 1 | seq |
| .....aguacuggggaugggugac.....                                                                                               | 51   | 0 | seq |
| .....aguacuggggaugggugacc.....                                                                                              | 111  | 0 | seq |
| .....aguacuggggaugggGgacc.....                                                                                              | 2    | 1 | seq |
| .....aguacuggggaugggugacca.....                                                                                             | 2    | 0 | seq |
| .....guacuggggaugggugac.....                                                                                                | 76   | 0 | seq |
| .....guacuggggaugggugacc.....                                                                                               | 154  | 0 | seq |
| .....guacuggggaugggugacca.....                                                                                              | 18   | 0 | seq |
| .....guacuggggaugggugaccac.....                                                                                             | 1    | 0 | seq |
| .....Nacuggggaugggugacc.....                                                                                                | 1    | 1 | seq |
| .....uacuggggaugggugacc.....                                                                                                | 217  | 0 | seq |
| .....uacuggggaugggugacca.....                                                                                               | 19   | 0 | seq |
| .....acuggggaugggugacca.....                                                                                                | 19   | 0 | seq |
| .....Ncuggggaugggugacca.....                                                                                                | 1    | 1 | seq |
| .....acugggGugggugacca.....                                                                                                 | 1    | 1 | seq |
| .....cuggggaugggugaccac.....                                                                                                | 2    | 0 | seq |
| .....cuggggaugggugaccacc.....                                                                                               | 1    | 0 | seq |

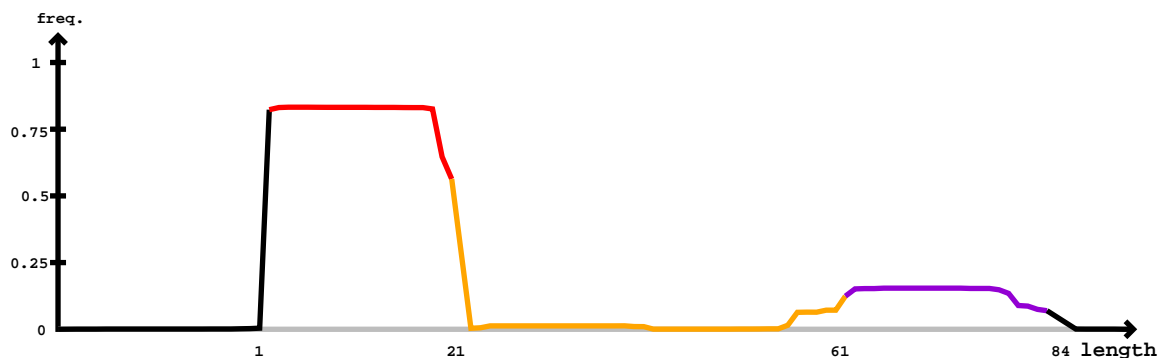

Star

[illegible]

## Mature

## Star

cgccucgaucugugugagugcugacagaagagagugagcacacauagcaggagcucaugagacuaugaguucagccaugcugugcuacgucucuuucugucagcggcucau

|                                   |      |   |     |
|-----------------------------------|------|---|-----|
| .....ugacagaagagagugagcC.....     | 3    | 1 | seq |
| .....ugacagaagagGgugagca.....     | 1    | 1 | seq |
| .....ugacagaGgagagugagca.....     | 2    | 1 | seq |
| .....ugacagaagagagugagcG.....     | 15   | 1 | seq |
| .....ugacagaagagagugagcU.....     | 4    | 1 | seq |
| .....ugacagaagagagugagca.....     | 274  | 0 | seq |
| .....ugacGgaagagagugagca.....     | 1    | 1 | seq |
| .....ugGcagaagagagugagca.....     | 1    | 1 | seq |
| .....ugacagaagaCagugagca.....     | 1    | 1 | seq |
| .....ugacagaagagagugaAca.....     | 1    | 1 | seq |
| .....ugacagaagagagCgagca.....     | 1    | 1 | seq |
| .....ugacagaagagagugaAcac.....    | 1    | 1 | seq |
| .....ugacagaGgagagugagcac.....    | 6    | 1 | seq |
| .....ugacUgaagagagugagcac.....    | 1    | 1 | seq |
| .....ugacagaagagagugagcac.....    | 2015 | 0 | seq |
| .....ugacagUagagagugagcac.....    | 1    | 1 | seq |
| .....ugacagaagagagugagcaA.....    | 15   | 1 | seq |
| .....ugacaAaagagagugagcac.....    | 1    | 1 | seq |
| .....ugaUagaagagagugagcac.....    | 3    | 1 | seq |
| .....ugacagaagagagugagcGc.....    | 10   | 1 | seq |
| .....ugacagaagagagaAugagcac.....  | 1    | 1 | seq |
| .....ugacagaagagagCgagcac.....    | 7    | 1 | seq |
| .....ugacagaagaAagugagcac.....    | 1    | 1 | seq |
| .....ugacagaagagagugagcUc.....    | 1    | 1 | seq |
| .....ugacagGagagagugagcac.....    | 13   | 1 | seq |
| .....ugacagaagagagugagUac.....    | 2    | 1 | seq |
| .....ugacagaagagagugUgcac.....    | 2    | 1 | seq |
| .....ugacGgaagagagugagcac.....    | 9    | 1 | seq |
| .....ugacagaagGgagugagcac.....    | 10   | 1 | seq |
| .....ugacaUaagagagugagcac.....    | 2    | 1 | seq |
| .....ugacagaagagagugaAagcac.....  | 2    | 1 | seq |
| .....ugacagaagagagGgagcac.....    | 1    | 1 | seq |
| .....ugacagaagagagugCgcac.....    | 1    | 1 | seq |
| .....Ggacagaagagagugagcac.....    | 1    | 1 | seq |
| .....Agacagaagagagugagcac.....    | 2    | 1 | seq |
| .....ugUcagaagagagugagcac.....    | 2    | 1 | seq |
| .....Ngacagaagagagugagcac.....    | 5    | 1 | seq |
| .....ugacagaagagGgugagcac.....    | 3    | 1 | seq |
| .....Ggacagaagagagugagcac.....    | 5    | 1 | seq |
| .....ugacagaauagagugagcac.....    | 1    | 1 | seq |
| .....ugacagaagUgagugagcac.....    | 1    | 1 | seq |
| .....ugacagaagagagugagcaG.....    | 2    | 1 | seq |
| .....ugacagaagagagugagcCc.....    | 1    | 1 | seq |
| .....ugGcagaagagagugagcac.....    | 10   | 1 | seq |
| .....ugacagaagagagugagcacC.....   | 12   | 1 | seq |
| .....ugacagaagagagugagGaca.....   | 1    | 1 | seq |
| .....ugacagGagagagugagcaca.....   | 1    | 1 | seq |
| .....ugacagaagagagugagcaca.....   | 32   | 0 | seq |
| .....ugacagaagagagugagcacU.....   | 23   | 1 | seq |
| .....ugacagaagagagugagcCca.....   | 1    | 1 | seq |
| .....ugacagaagagagugagcacG.....   | 3    | 1 | seq |
| .....ugacagaagagagugagcacaA.....  | 1    | 1 | seq |
| .....gacagaagagagugagU.....       | 2    | 1 | seq |
| .....gacagaagagagugagc.....       | 15   | 0 | seq |
| .....gacagaagagagugagca.....      | 10   | 0 | seq |
| .....gGcagaagagagugagca.....      | 1    | 1 | seq |
| .....gacagaagagagGgagca.....      | 1    | 1 | seq |
| .....gacagaagagagugagcac.....     | 3    | 0 | seq |
| .....acagaagagagugagca.....       | 3    | 0 | seq |
| .....acagaagagagugagcac.....      | 1    | 0 | seq |
| .....acagaagagagugagcaca.....     | 1    | 0 | seq |
| .....acauagcaggagcucaugag.....    | 1    | 0 | seq |
| .....acauagcaggagcucaugagacu..... | 1    | 0 | seq |
| .....cauagcUggagcucaug.....       | 5    | 1 | seq |
| .....Gauagcaggagcucaug.....       | 6    | 1 | seq |
| .....auagcaggagcucaugU.....       | 1    | 1 | seq |
| .....auagcaggagcucaugUg.....      | 8    | 1 | seq |
| .....uagcaggagcucaugag.....       | 1    | 0 | seq |
| .....uagcaggagcucaugUg.....       | 27   | 1 | seq |
| .....gagacuaugaguucagccau.....    | 1    | 0 | seq |

## Mature

## Star

cgccucgaucugugagugcugacagaagagagugagcacacauagcaggagcucaugagacuaugaguucagccaugcgugcucacgucucuuucugucagcggcucau

|                                                 |     |   |     |
|-------------------------------------------------|-----|---|-----|
| .....augaguucagccaugcg.....                     | 1   | 0 | seq |
| .....ucagccaugcgugcucacgucucuuucugucagcgg.....  | 1   | 0 | seq |
| .....agccaugcgugcucacgucucC.....                | 1   | 1 | seq |
| .....gccaugcgugcucacgucucu.....                 | 1   | 0 | seq |
| .....gccaugcgugcucacgucucuuucugucagcggcuca..... | 1   | 0 | seq |
| .....caugcgugcucacgucucG.....                   | 1   | 1 | seq |
| .....caugcgugcCcacgucucuuuc.....                | 1   | 1 | seq |
| .....caugcgugcucacgucucuuuc.....                | 13  | 0 | seq |
| .....caugcAugcucacgucucuuuc.....                | 1   | 1 | seq |
| .....caugcgugcucCcgucucuuuc.....                | 1   | 1 | seq |
| .....caugcgCgcucacgucucuuuc.....                | 1   | 1 | seq |
| .....caugcgugcucAUGCucucuuuc.....               | 1   | 1 | seq |
| .....caugcgugcucacgucucuuucC.....               | 8   | 1 | seq |
| .....caugcgugcucacgucucuuuc.....                | 24  | 0 | seq |
| .....caugUGugcucacgucucuuuc.....                | 1   | 1 | seq |
| .....caugcgugcucacgucucuuucug.....              | 1   | 0 | seq |
| .....augcgugcucacgucucu.....                    | 1   | 0 | seq |
| .....augcgugcucacgucucuuuc.....                 | 5   | 0 | seq |
| .....augcgugcAcacgucucuuuc.....                 | 1   | 1 | seq |
| .....augcgugcucacgucucuuuc.....                 | 8   | 0 | seq |
| .....augcgugcucacgucucuuucG.....                | 1   | 1 | seq |
| .....augcgugcucacgucucuuucU.....                | 1   | 1 | seq |
| .....augUGugcucacgucucuuucug.....               | 1   | 1 | seq |
| .....augcgugcucacgucucuuucAg.....               | 1   | 1 | seq |
| .....augcgugUucacgucucuuucug.....               | 2   | 1 | seq |
| .....augcUugcucacgucucuuucug.....               | 1   | 1 | seq |
| .....augcgugcucacgucucuuucug.....               | 154 | 0 | seq |
| .....augcgugcucacgucucuuucCg.....               | 1   | 1 | seq |
| .....augcgugcucacgucucuuucA.....                | 7   | 1 | seq |
| .....augcgugcucacgucucuuCug.....                | 1   | 1 | seq |
| .....augcgugcucacgCucuuucug.....                | 1   | 1 | seq |
| .....augGgugcucacgucucuuucug.....               | 1   | 1 | seq |
| .....augcgugcucacgAcucuuucug.....               | 2   | 1 | seq |
| .....augcgugcucacgucucuuucGg.....               | 1   | 1 | seq |
| .....augcgugcucacgucucuuucugA.....              | 1   | 1 | seq |
| .....ugcgugcucacgucucuuuc.....                  | 1   | 0 | seq |
| .....ugcgugcucacgucucuuucug.....                | 2   | 0 | seq |
| .....cgugcucacgucucuuucC.....                   | 2   | 1 | seq |
| .....cgugcucacgucucuuuc.....                    | 1   | 0 | seq |
| .....cgugcucacgucucuuucug.....                  | 1   | 0 | seq |
| .....cgugcucacgucucuuucuguc.....                | 23  | 0 | seq |
| .....cgugcucacgucucuuucuguU.....                | 2   | 1 | seq |
| .....cgugcucacgucucuuucugucU.....               | 1   | 1 | seq |
| .....ugcucacgucucuuuc.....                      | 3   | 0 | seq |
| .....ugcucacgucucuuucug.....                    | 1   | 0 | seq |
| .....ugcucacgucucuuucugC.....                   | 2   | 1 | seq |
| .....ugcucacgucucuuucugu.....                   | 1   | 0 | seq |
| .....ugcucacgucucuuucuguU.....                  | 2   | 1 | seq |
| .....ugcucacgucucuuucugCc.....                  | 1   | 1 | seq |
| .....ugcucacgucucuuucuguc.....                  | 11  | 0 | seq |
| .....ugcucacgucucuuucuguca.....                 | 8   | 0 | seq |
| .....ugcucacgucCuuucugucag.....                 | 1   | 1 | seq |
| .....ugcucacgucucuuucugCag.....                 | 2   | 1 | seq |
| .....ugcucacgucucuuucugucGg.....                | 1   | 1 | seq |
| .....ugcucacgucucuCucugucag.....                | 1   | 1 | seq |
| .....ugcucacgucucuuucugucaU.....                | 1   | 1 | seq |
| .....ugcucacgucucuuucugucaA.....                | 2   | 1 | seq |
| .....uCeucacgucucuuucugucag.....                | 1   | 1 | seq |
| .....ugcucacgucucuuucugucag.....                | 141 | 0 | seq |
| .....ugGucacgucucuuucugucag.....                | 1   | 1 | seq |
| .....ugcucacgucucuuucugucagU.....               | 1   | 1 | seq |
| .....ugcucacgucCuuucugucagc.....                | 1   | 1 | seq |
| .....ugcucacgucucuuucAucagc.....                | 1   | 1 | seq |
| .....ugcucacgucucuuCcugucagc.....               | 1   | 1 | seq |
| .....ugcucacgucucuuucugucagA.....               | 1   | 1 | seq |
| .....ugcucacgucucuuucugucagc.....               | 21  | 0 | seq |
| .....ugcucacgucucuuucugucagAg.....              | 1   | 1 | seq |
| .....ugcucacgucucuuucugucagCA.....              | 1   | 1 | seq |
| .....gcucacgucucuuucugC.....                    | 2   | 1 | seq |
| .....gcucacgucucCuucugu.....                    | 1   | 1 | seq |

## Mature

## Star

|                                                                                                                |    |   |     |
|----------------------------------------------------------------------------------------------------------------|----|---|-----|
| cgccucgaucugugagugcugacagaagagagagcacacauagcaggagcucaugagacuaugaguucagccaugcgcgugcucacgucucuuucugucagcgggcucau |    |   |     |
| .....gcucacgucucuuucugu.....                                                                                   | 1  | 0 | seq |
| .....gcucacgucucuuucugA.....                                                                                   | 1  | 1 | seq |
| .....gcucacgucucuuucugCc.....                                                                                  | 1  | 1 | seq |
| .....gcucacgucucuuucuguc.....                                                                                  | 7  | 0 | seq |
| .....gcucGcgucucuuucuguca.....                                                                                 | 1  | 1 | seq |
| .....gcucacgucucuuucuguca.....                                                                                 | 8  | 0 | seq |
| .....gcucacgucucuuucugucag.....                                                                                | 38 | 0 | seq |
| .....gcucacgucucuuCcugucag.....                                                                                | 1  | 1 | seq |
| .....gcucacgCcucuuucugucag.....                                                                                | 1  | 1 | seq |
| .....gcucacgucucuuucugucaA.....                                                                                | 2  | 1 | seq |
| .....gcucacgucucuuucugucagU.....                                                                               | 2  | 1 | seq |
| .....gcucGcgucucuuucugucagc.....                                                                               | 1  | 1 | seq |
| .....gcucacgucucuuucugucagc.....                                                                               | 38 | 0 | seq |
| .....gcucacgucucuuCcugucagc.....                                                                               | 1  | 1 | seq |
| .....gcucacgucucuuucugucagcgggcuca.....                                                                        | 1  | 0 | seq |
| .....cucGcgucucuuucuguc.....                                                                                   | 1  | 1 | seq |
| .....cucacgucucuuucugucag.....                                                                                 | 2  | 0 | seq |
| .....cucacgucucuuucugucagU.....                                                                                | 1  | 1 | seq |
| .....cucacgucucuuucugucagc.....                                                                                | 1  | 0 | seq |
| .....cacgucucuuucuguca.....                                                                                    | 2  | 0 | seq |
| .....cacgucucuuucugucagc.....                                                                                  | 3  | 0 | seq |
| .....cacgucucuuucugucagU.....                                                                                  | 1  | 1 | seq |

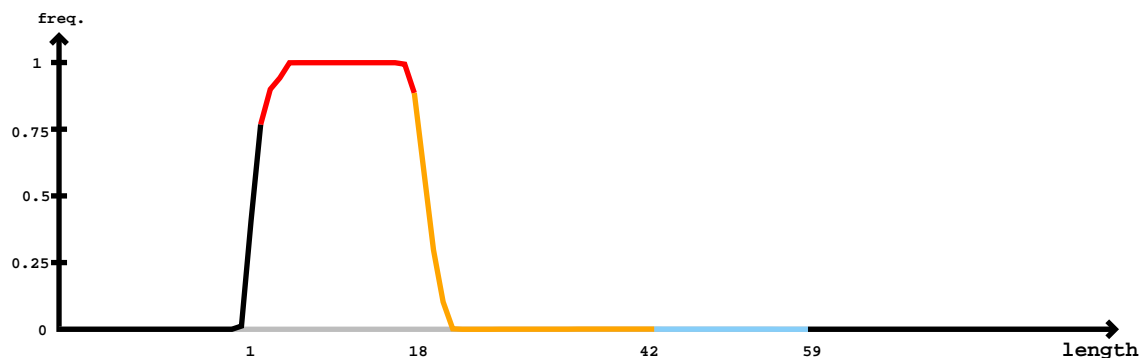

Star

|                                                                                             |                                                                                                                                              |     |        |
|---------------------------------------------------------------------------------------------|----------------------------------------------------------------------------------------------------------------------------------------------|-----|--------|
| 5'-                                                                                         | gaaccaucgauuaauaauuu <u>aucggguaaaagcaaaaugcccccaaugcuucaaucauuugcuuuacccugauaaaau</u> cauuu <sup>-3'</sup> cauuuaaucaaaugguccaauuuuacauccuc | exp |        |
| (((((((( ((((((( ((((((((((((((((((((( (. . . . . ))))))) ))))))) ))))))) ))))))) . . . . . | reads                                                                                                                                        | mm  | sample |
| . . . . . Cuuuuacggguaaaagca . . . . .                                                      | 10                                                                                                                                           | 1   | seq    |
| . . . . . Nuuuuacggguaaaagca . . . . .                                                      | 2                                                                                                                                            | 1   | seq    |
| . . . . . auuuuacggguaaaagca . . . . .                                                      | 1                                                                                                                                            | 0   | seq    |
| . . . . . Guuuuacggguaaaagca . . . . .                                                      | 4                                                                                                                                            | 1   | seq    |
| . . . . . Cuuuuacggguaaaagcaa . . . . .                                                     | 2                                                                                                                                            | 1   | seq    |
| . . . . . Nuuuuacggguaaaagcaa . . . . .                                                     | 2                                                                                                                                            | 1   | seq    |
| . . . . . Guuuuacggguaaaagcaaaa . . . . .                                                   | 1                                                                                                                                            | 1   | seq    |
| . . . . . Nuuuuacggguaaaagcaaaa . . . . .                                                   | 1                                                                                                                                            | 1   | seq    |
| . . . . . Cuuuuacggguaaaagcaaaa . . . . .                                                   | 4                                                                                                                                            | 1   | seq    |
| . . . . . auuuuacggguaaaagcaaaa . . . . .                                                   | 1                                                                                                                                            | 0   | seq    |
| . . . . . auuuuacggguaaaagcaaaau . . . . .                                                  | 1                                                                                                                                            | 0   | seq    |
| . . . . . Cuuuuacggguaaaagcaaaau . . . . .                                                  | 1                                                                                                                                            | 1   | seq    |
| . . . . . auuuuacggguaaaagcaaaUG . . . . .                                                  | 3                                                                                                                                            | 1   | seq    |
| . . . . . Uuuuacggguaaaagcaaaauu . . . . .                                                  | 3                                                                                                                                            | 1   | seq    |
| . . . . . uuuuacggguaGagcaa . . . . .                                                       | 3                                                                                                                                            | 1   | seq    |
| . . . . . uuuuacggguaaaagcaa . . . . .                                                      | 291                                                                                                                                          | 0   | seq    |
| . . . . . uuuuacgggGaaagcaa . . . . .                                                       | 1                                                                                                                                            | 1   | seq    |
| . . . . . Cuuacggguaaaagcaa . . . . .                                                       | 3                                                                                                                                            | 1   | seq    |
| . . . . . uuuuacggguGaagcaa . . . . .                                                       | 1                                                                                                                                            | 1   | seq    |
| . . . . . uuuuacggguaaaagcaG . . . . .                                                      | 11                                                                                                                                           | 1   | seq    |
| . . . . . uuuuacggguaaaagcGa . . . . .                                                      | 3                                                                                                                                            | 1   | seq    |
| . . . . . uuuuacggguaaaagcCa . . . . .                                                      | 1                                                                                                                                            | 1   | seq    |
| . . . . . uuUGcggguaaaagcaa . . . . .                                                       | 1                                                                                                                                            | 1   | seq    |
| . . . . . uuuuacggguaaGgcaa . . . . .                                                       | 2                                                                                                                                            | 1   | seq    |
| . . . . . Nuuuacggguaaaagcaa . . . . .                                                      | 1                                                                                                                                            | 1   | seq    |
| . . . . . uuuuacgggAuaaaagcaa . . . . .                                                     | 1                                                                                                                                            | 1   | seq    |
| . . . . . uuuuacggguaaaaUcaaaa . . . . .                                                    | 1                                                                                                                                            | 1   | seq    |
| . . . . . uuAAucggguaaaagcaaaa . . . . .                                                    | 1                                                                                                                                            | 1   | seq    |
| . . . . . uCuauacggguaaaagcaaaa . . . . .                                                   | 1                                                                                                                                            | 1   | seq    |
| . . . . . Cuuacggguaaaagcaaaa . . . . .                                                     | 2                                                                                                                                            | 1   | seq    |
| . . . . . uuuuacggguaaaagcaaaa . . . . .                                                    | 513                                                                                                                                          | 0   | seq    |
| . . . . . uuuUucggguaaaagcaaaa . . . . .                                                    | 1                                                                                                                                            | 1   | seq    |
| . . . . . uuuuacggguaaaagcaaG . . . . .                                                     | 8                                                                                                                                            | 1   | seq    |
| . . . . . uuuuuAggguaaaagcaaaa . . . . .                                                    | 1                                                                                                                                            | 1   | seq    |

## Mature

## Star

|                                                                                                               |     |   |     |
|---------------------------------------------------------------------------------------------------------------|-----|---|-----|
| gaaccaucgauuaaaauuuuauucggguaaagcaaaauugcccccaaugcuucuaaucauuugcuuuaccugauaaaucuuuuauaacaugguucaauuuuacauccuc |     |   |     |
| .uuuauucggguaaagcaGa.                                                                                         | 1   | 1 | seq |
| .uuCaucggguaaagcaaa.                                                                                          | 1   | 1 | seq |
| .uuuauucggguaaaagcGaa.                                                                                        | 2   | 1 | seq |
| .uuuauucggguaaaagcaaU.                                                                                        | 2   | 1 | seq |
| .uuuauucggguaaGgcaaa.                                                                                         | 4   | 1 | seq |
| .uuuauucggguGaagcaaa.                                                                                         | 1   | 1 | seq |
| .uuuauucggguCaagcaaa.                                                                                         | 2   | 1 | seq |
| .uuuauucggguGagcaaa.                                                                                          | 1   | 1 | seq |
| .CuuaucggguaaaagcaaaU.                                                                                        | 1   | 1 | seq |
| .uuuauucggguaaaagcaaaU.                                                                                       | 130 | 0 | seq |
| .uuuaCcgguuaaagcaaaU.                                                                                         | 1   | 1 | seq |
| .uuuauucggguGagcaaaU.                                                                                         | 1   | 1 | seq |
| .uuuauucggguaaaagcaaaC.                                                                                       | 7   | 1 | seq |
| .uuuauucggguGaagcaaaU.                                                                                        | 1   | 1 | seq |
| .uuuauucggguaaaagcGaaU.                                                                                       | 1   | 1 | seq |
| .uuuauucggguaaaagcaaaA.                                                                                       | 1   | 1 | seq |
| .uuuauucggguaaaagcaGau.                                                                                       | 1   | 1 | seq |
| .uuuauucggguaaGgcaaaU.                                                                                        | 2   | 1 | seq |
| .uuuauucggguaaaagcaaCu.                                                                                       | 2   | 1 | seq |
| .uuuauucggguaaaagcaaaU.                                                                                       | 5   | 0 | seq |
| .uuuauucggguaaaagcaaaU.                                                                                       | 6   | 1 | seq |
| .uuuauucggguaaaagcaaaU.                                                                                       | 137 | 1 | seq |
| .uuuauucggguaaaagcaaUuug.                                                                                     | 1   | 1 | seq |
| .uuuauucggguaaaagcaaaUGg.                                                                                     | 26  | 1 | seq |
| .uuuauucggguaaaagcaaaUGgc.                                                                                    | 1   | 1 | seq |
| .uuGucggguaaaagcaaa.                                                                                          | 3   | 1 | seq |
| .uCaucggguaaaagcaaa.                                                                                          | 2   | 1 | seq |
| .uuauucggguaaaagcaGa.                                                                                         | 5   | 1 | seq |
| .uuauucggguGagcaaa.                                                                                           | 3   | 1 | seq |
| .uuauucggguaaGgcaaa.                                                                                          | 2   | 1 | seq |
| .uuauucggguUagcaaa.                                                                                           | 1   | 1 | seq |
| .uuuauucggguaaaagcaaa.                                                                                        | 1   | 1 | seq |
| .uuuauucggguaaaagUaaa.                                                                                        | 1   | 1 | seq |
| .uuuauucggguaaaagcGaa.                                                                                        | 2   | 1 | seq |
| .uuUucggguaaaagcaaa.                                                                                          | 1   | 1 | seq |
| .Guauucggguaaaagcaaa.                                                                                         | 5   | 1 | seq |
| .uuauucggguaaaagcaaG.                                                                                         | 6   | 1 | seq |
| .uuauucggguaaaagcaaa.                                                                                         | 624 | 0 | seq |
| .Cuauucggguaaaagcaaa.                                                                                         | 3   | 1 | seq |
| .uuauucggguaaaagcaaU.                                                                                         | 3   | 1 | seq |
| .uuuauucggguaaaagcaaa.                                                                                        | 1   | 1 | seq |
| .uuauucggguaaaagcaaaC.                                                                                        | 12  | 1 | seq |
| .uAauucggguaaaagcaaaU.                                                                                        | 2   | 1 | seq |
| .uuauucggguaaaagcaaaA.                                                                                        | 3   | 1 | seq |
| .uuuauucggguaaaagcaaaU.                                                                                       | 184 | 0 | seq |
| .uuauucggguGaaagcaaaU.                                                                                        | 1   | 1 | seq |
| .CuauucggguaaaagcaaaU.                                                                                        | 3   | 1 | seq |
| .uuauucggguaaaagcaaGu.                                                                                        | 1   | 1 | seq |
| .uuauucggguaaGgcaaaU.                                                                                         | 2   | 1 | seq |
| .uuauucggguaaaagcaGau.                                                                                        | 1   | 1 | seq |
| .NuauucggguaaaagcaaaU.                                                                                        | 1   | 1 | seq |
| .uuauucggguaaaagcaaaG.                                                                                        | 1   | 1 | seq |
| .uuauucggguaaaagcaaaU.                                                                                        | 156 | 1 | seq |
| .uuauucggguaaaagcaaaU.                                                                                        | 8   | 0 | seq |
| .uuauucggguaaaagcaaaU.                                                                                        | 3   | 1 | seq |
| .uuauucggguaaaagcaaaUGg.                                                                                      | 40  | 1 | seq |
| .AuauucggguaaaagcaaaU.                                                                                        | 1   | 1 | seq |
| .uauucggguCaaagcaaaU.                                                                                         | 1   | 1 | seq |
| .uauucggguaaGgcaaaU.                                                                                          | 1   | 1 | seq |
| .uaCcgguuaaagcaaaU.                                                                                           | 1   | 1 | seq |
| .uauucggguaaaagcaaaU.                                                                                         | 172 | 0 | seq |
| .uauucggguaaaagcUaaU.                                                                                         | 1   | 1 | seq |
| .uauucggguaaaagcaaaG.                                                                                         | 3   | 1 | seq |
| .uauucggguaaaagcaaaC.                                                                                         | 8   | 1 | seq |
| .uauucggguaaaagcaGau.                                                                                         | 1   | 1 | seq |
| .uGucggguaaaagcaaaU.                                                                                          | 3   | 1 | seq |
| .uauucggguaaaagcaaaU.                                                                                         | 146 | 1 | seq |
| .uauucggguaaaagcaaaU.                                                                                         | 5   | 0 | seq |
| .uauucggguaaaagcaaaU.                                                                                         | 5   | 1 | seq |
| .uauucggguaaaagcaaaUGg.                                                                                       | 44  | 1 | seq |

# Mature

# Star

|                                                                                                                |     |   |     |
|----------------------------------------------------------------------------------------------------------------|-----|---|-----|
| gaaccacugauuaaaauuuuuuucggguaaaagcaaaauugcccccgaugcuucuaaucauuuugcuuuaccugauaaaucuuuuaucaaugguucauuuuuacauccuc |     |   |     |
| .....uucggguaaaagcaaaUGc.....                                                                                  | 3   | 1 | seq |
| .....aucggguaaaagcaaaUA.....                                                                                   | 100 | 1 | seq |
| .....aucggguaaaagcaaaUC.....                                                                                   | 2   | 1 | seq |
| .....aucggguaaaagcaaaUU.....                                                                                   | 4   | 0 | seq |
| .....aucggguaaaagcaaaUG.....                                                                                   | 22  | 1 | seq |
| .....ucggguaaaagcaaaUG.....                                                                                    | 1   | 1 | seq |
| .....ucggguaaaagcaaaUA.....                                                                                    | 1   | 1 | seq |
| .....ucggguaaaagcaaaUG.....                                                                                    | 168 | 1 | seq |
| .....cggguaaaagcaaaUGc.....                                                                                    | 1   | 1 | seq |
| .....aaUCcuucuaaucauuu.....                                                                                    | 1   | 1 | seq |
| .....uaaucauuugcuuuaccCgau.....                                                                                | 1   | 1 | seq |



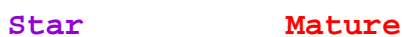

|                                                                                                                                       | -3'   | obs |        |
|---------------------------------------------------------------------------------------------------------------------------------------|-------|-----|--------|
|                                                                                                                                       |       | exp |        |
| augucuuauucgauuaugggaaaauaggugugcuagggguauuggu <u>ccuauuuauuguuggccuucgagaaaaaguuu</u> a <u>augauuaauaggggacu</u> auugagugcccuuccauc  | reads | mm  | sample |
| augucuuauucgauuaugggaaaauaggugugcuagggguauuggu <u>uccuauuuauuguuggccuucgagaaaaaguuu</u> a <u>augauuaauaggggacu</u> auugagugcccuuccauc | 1     | 1   | seq    |
| .....((((((...(((.(...(((.....(((((((((((.(...(((.....)))..))))).)))).)))).)))).)))).)))).))....                                      | 1     | 1   | seq    |
| .....guCugguuccuauuuauuguuggc.....                                                                                                    | 1     | 1   | seq    |
| .....uCugguuccuauuuauuguu.....                                                                                                        | 4     | 1   | seq    |
| .....ugguuccuauuGuguugggccuucga.....                                                                                                  | 1     | 1   | seq    |
| .....gguccuauuGuguugggccuucga.....                                                                                                    | 1     | 0   | seq    |
| .....uccuauuuauuguuggccuu.....                                                                                                        | 1     | 0   | seq    |
| .....ccuauuuauuguuggccuu.....                                                                                                         | 1     | 1   | seq    |
| .....ccuauuCuuguuggccuu.....                                                                                                          | 2     | 1   | seq    |
| .....guGuaaugauuaauaggggacu.....                                                                                                      | 3     | 1   | seq    |
| .....gAuuaaugauuaauaggggacu.....                                                                                                      | 1     | 1   | seq    |
| .....uGuaaugauuaauaggga.....                                                                                                          | 1     | 1   | seq    |
| .....Auuaaugauuaauaggggacu.....                                                                                                       | 2     | 1   | seq    |
| .....Nuuaaugauuaauaggggacu.....                                                                                                       | 4     | 1   | seq    |
| .....uGuaaugauuaauaggggacu.....                                                                                                       | 1     | 1   | seq    |
| .....Cuuaugauuaauaggga.....                                                                                                           | 1     | 0   | seq    |
| .....uuuaugauuaauaggga.....                                                                                                           | 1     | 1   | seq    |
| .....Nuuaugauuaauaggggac.....                                                                                                         | 1     | 0   | seq    |
| .....uuuaugauuaauaggggac.....                                                                                                         | 4     | 1   | seq    |
| .....uuuaugauuaauaggggacu.....                                                                                                        | 22    | 0   | seq    |
| .....uuuaugauuaauaggggacC.....                                                                                                        | 1     | 1   | seq    |
| .....Nuuaugauuaauaggggacu.....                                                                                                        | 14    | 1   | seq    |
| .....uuuaugauuaauagggUacu.....                                                                                                        | 1     | 1   | seq    |
| .....uuuaugauuaauaggggacuG.....                                                                                                       | 7     | 1   | seq    |
| .....Nuuaugauuaauaggggacua.....                                                                                                       | 4     | 1   | seq    |
| .....Auuaugauuaauaggggacua.....                                                                                                       | 1     | 1   | seq    |
| .....uuuaugauuaauaggggacuGu.....                                                                                                      | 4     | 1   | seq    |
| .....Naugauuaauaggggac.....                                                                                                           | 2     | 1   | seq    |
| .....uaugauuaauagggUac.....                                                                                                           | 1     | 1   | seq    |
| .....uaugauuaauaggggac.....                                                                                                           | 680   | 0   | seq    |
| .....uaugauuaaAaggggac.....                                                                                                           | 1     | 1   | seq    |
| .....uaaugaCuauuaggggac.....                                                                                                          | 2     | 1   | seq    |
| .....uaugaauuaGuaggggac.....                                                                                                          | 1     | 1   | seq    |
| .....uaugaauuaauagggaG.....                                                                                                           | 1     | 1   | seq    |

## Star

## Mature

augucuuauucgauuauagggaauuaggugugcuaggguuagguccuauuauuguuggccuucgagaaaaguuuuauugauuauauagggacuauugagugcccuuccauc

|                                 |      |   |     |
|---------------------------------|------|---|-----|
| .....uaugauuauauagggaA.....     | 2    | 1 | seq |
| .....GaugauuauauagggaC.....     | 1    | 1 | seq |
| .....AaugauuauauagggaC.....     | 2    | 1 | seq |
| .....uaugGuuauauagggaC.....     | 2    | 1 | seq |
| .....uaugauCaauagggaC.....      | 4    | 1 | seq |
| .....uaugauuaaCagggaC.....      | 1    | 1 | seq |
| .....uaugauuaaGagggaC.....      | 1    | 1 | seq |
| .....uaGugauuauauagggaC.....    | 1    | 1 | seq |
| .....uaaAgauuauauagggaC.....    | 1    | 1 | seq |
| .....uaaAgauuauauagggaCu.....   | 1    | 1 | seq |
| .....NaaugauuauauagggaCu.....   | 9    | 1 | seq |
| .....uaugauuaGuagggaCu.....     | 13   | 1 | seq |
| .....uaugauuauauagggaUcu.....   | 2    | 1 | seq |
| .....uaugauuauauagggaCC.....    | 736  | 1 | seq |
| .....uaugaCuauagggaCu.....      | 4    | 1 | seq |
| .....uaugauuUauagggaCu.....     | 1    | 1 | seq |
| .....uaCugauuauauagggaCu.....   | 1    | 1 | seq |
| .....AaugauuauauagggaCu.....    | 3    | 1 | seq |
| .....uaugauCaauagggaCu.....     | 6    | 1 | seq |
| .....uaugauuauauagggaUgacu..... | 3    | 1 | seq |
| .....uaGugauuauauagggaCu.....   | 18   | 1 | seq |
| .....uaugauAauagggaCu.....      | 3    | 1 | seq |
| .....uaugCuauagggaCu.....       | 2    | 1 | seq |
| .....uaUugauuauauagggaCu.....   | 3    | 1 | seq |
| .....uaugauuauauagggaAu.....    | 1    | 1 | seq |
| .....GaugauuauauagggaCu.....    | 11   | 1 | seq |
| .....uaugauuaaCagggaCu.....     | 5    | 1 | seq |
| .....uaugauuaUuagggaCu.....     | 1    | 1 | seq |
| .....uaugauuauuUgggaCu.....     | 4    | 1 | seq |
| .....uNaugauuauauagggaCu.....   | 1    | 1 | seq |
| .....uaauAauuauauagggaCu.....   | 2    | 1 | seq |
| .....uaugauuauauagggaCcu.....   | 3    | 1 | seq |
| .....uaugauuauauagggaCA.....    | 125  | 1 | seq |
| .....uaugauuauauagggaCu.....    | 4484 | 0 | seq |
| .....uaaCgauuauauagggaCu.....   | 7    | 1 | seq |
| .....uaugauuauauagggaCG.....    | 165  | 1 | seq |
| .....uaugGuuauauagggaCu.....    | 17   | 1 | seq |
| .....uaauUauuauauagggaCu.....   | 1    | 1 | seq |
| .....AaugauuauauagggaCu.....    | 1    | 1 | seq |
| .....uaugauuaGuagggaCu.....     | 1    | 1 | seq |
| .....uaugGuuauauagggaCu.....    | 2    | 1 | seq |
| .....uaugauuauauagggaCu.....    | 297  | 0 | seq |
| .....uaugauuauauagggaCa.....    | 7    | 1 | seq |
| .....uaauAauuauauagggaCu.....   | 1    | 1 | seq |
| .....uaugauuauauagggaCGa.....   | 1    | 1 | seq |
| .....uaugauuauauagggaGacu.....  | 2    | 1 | seq |
| .....uaGugauuauauagggaCu.....   | 2    | 1 | seq |
| .....uaugauuauauagggaCuA.....   | 1    | 1 | seq |
| .....uaugauuauauagggaCuau.....  | 1    | 0 | seq |
| .....aCugauuauauagggaCu.....    | 1    | 1 | seq |
| .....aaugaGuauagggaCu.....      | 1    | 1 | seq |
| .....UaugauuauauagggaCu.....    | 6    | 1 | seq |
| .....aauGauuauauagggaCu.....    | 2    | 1 | seq |
| .....aaugauuaGuagggaCu.....     | 21   | 1 | seq |
| .....aaugauuaUuagggaCu.....     | 3    | 1 | seq |
| .....aaugauuauauagggaUcu.....   | 2    | 1 | seq |
| .....aaugauuauauagggaCcu.....   | 1    | 1 | seq |
| .....aaugauuauauagggaCC.....    | 817  | 1 | seq |
| .....aaUauuauauagggaCu.....     | 2    | 1 | seq |
| .....aaugauuauauagggaAu.....    | 2    | 1 | seq |
| .....aaCgauuauauagggaCu.....    | 7    | 1 | seq |
| .....aaAgauuauauagggaCu.....    | 3    | 1 | seq |
| .....CaugauuauauagggaCu.....    | 3    | 1 | seq |
| .....aGugauuauauagggaCu.....    | 32   | 1 | seq |
| .....aaugauuauauagggaCA.....    | 116  | 1 | seq |
| .....aaugGuuauauagggaCu.....    | 18   | 1 | seq |
| .....aaugauuauauagggaUacu.....  | 3    | 1 | seq |
| .....aaugaCuauagggaCu.....      | 15   | 1 | seq |
| .....aaugauuauuUgggaCu.....     | 1    | 1 | seq |
| .....aUugauuauauagggaCu.....    | 1    | 1 | seq |

## Star

## Mature

|                                                                                                                    |      |   |     |
|--------------------------------------------------------------------------------------------------------------------|------|---|-----|
| augucuuauucgauuauaggaaauaggugugcuagggguauagguccuauuauuguuggccuucgagaaaaguuuuauugauuuauuagggacuauugagugcccuuccauccc |      |   |     |
| .....aaugauuaCuagggacu.....                                                                                        | 1    | 1 | seq |
| .....aaugauCaauagggacu.....                                                                                        | 10   | 1 | seq |
| .....Naugauuaauagggacu.....                                                                                        | 11   | 1 | seq |
| .....aaugauuaauagggacG.....                                                                                        | 169  | 1 | seq |
| .....aaugauuaauagUgacu.....                                                                                        | 3    | 1 | seq |
| .....aaugauuaauagggacu.....                                                                                        | 4753 | 0 | seq |
| .....aaugauuaauaggCacu.....                                                                                        | 1    | 1 | seq |
| .....aaugauuaaCagggacu.....                                                                                        | 5    | 1 | seq |
| .....aaGgauuaauagggacu.....                                                                                        | 3    | 1 | seq |
| .....aaugGuuaauagggacua.....                                                                                       | 1    | 1 | seq |
| .....aaugauuaauagggacAa.....                                                                                       | 2    | 1 | seq |
| .....aaugauuaauagggacua.....                                                                                       | 244  | 0 | seq |
| .....aaugauuaauagggacGa.....                                                                                       | 2    | 1 | seq |
| .....aaugaCuauagggacua.....                                                                                        | 1    | 1 | seq |
| .....aaugauuaauagggacCa.....                                                                                       | 2    | 1 | seq |
| .....aaugauuaauagggacuaC.....                                                                                      | 1    | 1 | seq |
| .....aaugauuaauagggacuaGu.....                                                                                     | 1    | 1 | seq |
| .....aaugauuaauagggacuauug.....                                                                                    | 1    | 0 | seq |
| .....augauuaauagggacAa.....                                                                                        | 1    | 1 | seq |
| .....augaCuauagggacua.....                                                                                         | 1    | 1 | seq |
| .....augauuaauagggacCa.....                                                                                        | 8    | 1 | seq |
| .....augauuaauagggacua.....                                                                                        | 720  | 0 | seq |
| .....augauuaGuagggacua.....                                                                                        | 1    | 1 | seq |
| .....augauuaauagggUcua.....                                                                                        | 1    | 1 | seq |
| .....Gugauuaauagggacua.....                                                                                        | 3    | 1 | seq |
| .....Uugauuaauagggacua.....                                                                                        | 2    | 1 | seq |
| .....Cugauuaauagggacua.....                                                                                        | 1    | 1 | seq |
| .....augauuaauagggGcua.....                                                                                        | 3    | 1 | seq |
| .....augauuaauagggaGua.....                                                                                        | 1    | 1 | seq |
| .....aCgauuaauagggacua.....                                                                                        | 1    | 1 | seq |
| .....augauuaauCgggacua.....                                                                                        | 1    | 1 | seq |
| .....augauuaauagUgacua.....                                                                                        | 1    | 1 | seq |
| .....augauuaauagggacGa.....                                                                                        | 4    | 1 | seq |
| .....augauuaauagggAacua.....                                                                                       | 2    | 1 | seq |
| .....augauuaauagggacuau.....                                                                                       | 3    | 0 | seq |
| .....augauuaauagggacuac.....                                                                                       | 1    | 1 | seq |
| .....augauuaauagggacuA.....                                                                                        | 1    | 1 | seq |
| .....augauuaauagggacuUuu.....                                                                                      | 1    | 1 | seq |
| .....ugauuaauagggacuau.....                                                                                        | 3    | 0 | seq |
| .....ugauuaauagggacuac.....                                                                                        | 1    | 1 | seq |
| .....ugauuaauagggacuauA.....                                                                                       | 1    | 1 | seq |
| .....ugauuaauagggacuauG.....                                                                                       | 1    | 1 | seq |
| .....auuaauagggacuauCga.....                                                                                       | 1    | 1 | seq |
| .....uuauagggacuauCga.....                                                                                         | 1    | 1 | seq |

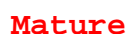[illegible]

## Star

## Mature

gagcaacgucuuugaaagggauaucccggcuccacaucucucuuuucuccacaauggaaggugcauggguugguuagagcauugguccucaagcaaaacuagcucgag

|                                      |     |   |     |
|--------------------------------------|-----|---|-----|
| .....uug <u>Uuu</u> agagcauuggu..... | 1   | 1 | seq |
| .....uugguuagagcauuggA.....          | 10  | 1 | seq |
| .....uugguuagagcauuggG.....          | 26  | 1 | seq |
| .....Nugguuagagcauuggu.....          | 1   | 1 | seq |
| .....uugguuagagcaCuggu.....          | 2   | 1 | seq |
| .....uugguCagagcauuggu.....          | 1   | 1 | seq |
| .....uugguuagagcauAggu.....          | 1   | 1 | seq |
| .....uugguuagaAcauuggu.....          | 1   | 1 | seq |
| .....Gugguuagagcauuggu.....          | 1   | 1 | seq |
| .....uugguuagagcauuggu.....          | 814 | 0 | seq |
| .....uugguuagGgcauuggu.....          | 3   | 1 | seq |
| .....uCgguuagagcauuggu.....          | 2   | 1 | seq |
| .....uugguuagagUauuggu.....          | 1   | 1 | seq |
| .....uugguAagagcauuggu.....          | 2   | 1 | seq |
| .....uugguuagagcauuggGc.....         | 9   | 1 | seq |
| .....uugguuagGgcauugguc.....         | 3   | 1 | seq |
| .....uAgguuagagcauugguc.....         | 1   | 1 | seq |
| .....uuggCuagagcauugguc.....         | 2   | 1 | seq |
| .....uCgguuagagcauugguc.....         | 2   | 1 | seq |
| .....uugguuagagAauugguc.....         | 1   | 1 | seq |
| .....Cugguuagagcauugguc.....         | 1   | 1 | seq |
| .....uugguuagagcaCugguc.....         | 3   | 1 | seq |
| .....uuggGuagagcauugguc.....         | 1   | 1 | seq |
| .....uugguuagagcauugguG.....         | 2   | 1 | seq |
| .....uugguuaAagcauugguc.....         | 1   | 1 | seq |
| .....Gugguuagagcauugguc.....         | 3   | 1 | seq |
| .....uugguuagagUauugguc.....         | 1   | 1 | seq |
| .....uugguuagagcauuggA.....          | 3   | 1 | seq |
| .....uugguuagagcauugAuc.....         | 1   | 1 | seq |
| .....uugguuGgagcauugguc.....         | 1   | 1 | seq |
| .....uuAguuagagcauugguc.....         | 1   | 1 | seq |
| .....uugguuagagcauuggCc.....         | 10  | 1 | seq |
| .....uugguuagagcauugguA.....         | 17  | 1 | seq |
| .....uugguuagagcauCgguc.....         | 2   | 1 | seq |
| .....Nugguuagagcauugguc.....         | 1   | 1 | seq |
| .....uugguuagagcauugguc.....         | 841 | 0 | seq |
| .....uugguuagagcUuugguc.....         | 3   | 1 | seq |
| .....uugguuagUgcauugguc.....         | 1   | 1 | seq |
| .....uugguCagagcauugguc.....         | 1   | 1 | seq |
| .....Augguuagagcauugguc.....         | 1   | 1 | seq |
| .....uugguuagagcauuggucA.....        | 8   | 1 | seq |
| .....uugguuagagcauuggCcc.....        | 1   | 1 | seq |
| .....Gugguuagagcauuggucc.....        | 1   | 1 | seq |
| .....uugguuagagcauuggucc.....        | 37  | 0 | seq |
| .....uugguuagagcauuggucG.....        | 14  | 1 | seq |
| .....uugguuagagcauugguccu.....       | 2   | 0 | seq |
| .....uugguuagagcauugguccuA.....      | 1   | 1 | seq |
| .....uUguuagagcauugguc.....          | 1   | 1 | seq |
| .....ugguuagagcauugguA.....          | 8   | 1 | seq |
| .....ugguuagagcauugguc.....          | 213 | 0 | seq |
| .....ugguuAagcauugguc.....           | 1   | 1 | seq |
| .....ugguuagagcauGgguc.....          | 1   | 1 | seq |
| .....ugguuagagcauuggCc.....          | 2   | 1 | seq |
| .....ugguuaUagcauugguc.....          | 1   | 1 | seq |
| .....ugguCagagcauugguc.....          | 2   | 1 | seq |
| .....uggCuagagcauugguc.....          | 2   | 1 | seq |
| .....ugguuagagcUuugguc.....          | 2   | 1 | seq |
| .....ugguuagagcauCgguc.....          | 1   | 1 | seq |
| .....ugguuGgagcauugguc.....          | 1   | 1 | seq |
| .....ugguuagagcauuggucc.....         | 7   | 0 | seq |
| .....ugguuagagcauuggucG.....         | 4   | 1 | seq |
| .....ugguuagagcauugguccuA.....       | 1   | 1 | seq |
| .....gguuagagcauuggucG.....          | 1   | 1 | seq |
| .....gguuagagcauuggucc.....          | 3   | 0 | seq |

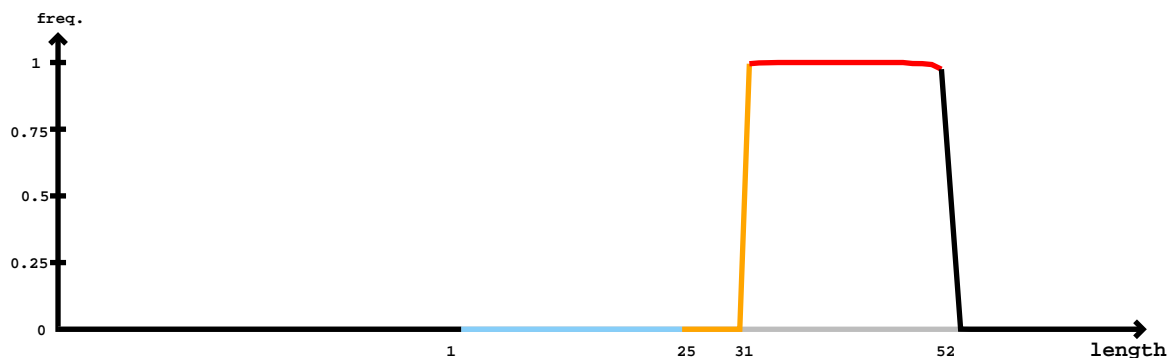

## Mature

| 5' - | ccuugccacaagaccaaauuggucucuaugaucucucauugc                                                  | aucucaggugagaccuucucggccuuggu | ugaagacugauauguugaugcuuuggggguuuuuuguugguug | -3'   | exp |        |
|------|---------------------------------------------------------------------------------------------|-------------------------------|---------------------------------------------|-------|-----|--------|
| ...  | (((((((((((((...))))))...((((((((((...)))))))))...))...)))))...))))...))))...))))...))))... |                               |                                             | reads | mm  | sample |
| ...  | ...ugaagacugGuauguug...                                                                     |                               |                                             | 18    | 1   | seq    |
| ...  | ...ugaagacugGuauguuga...                                                                    |                               |                                             | 2     | 1   | seq    |
| ...  | ...ugaagacugGuauguugau...                                                                   |                               |                                             | 15    | 1   | seq    |
| ...  | ...ugaagacugGuauguugaug...                                                                  |                               |                                             | 78    | 1   | seq    |
| ...  | ...ugaagacugUuauguugaugc...                                                                 |                               |                                             | 2     | 1   | seq    |
| ...  | ...ugaagacugauauguugaugc...                                                                 |                               |                                             | 4     | 0   | seq    |
| ...  | ...ugaagacugauauguugaugU...                                                                 |                               |                                             | 2     | 1   | seq    |
| ...  | ...ugaagacugGuauguugaugc...                                                                 |                               |                                             | 4594  | 1   | seq    |
| ...  | ...ugaagacugGuauguugaugcu...                                                                |                               |                                             | 11    | 1   | seq    |
| ...  | ...ugaagacugGuauguugaugcuu...                                                               |                               |                                             | 2     | 1   | seq    |
| ...  | ...gaagacugGuauguugaug...                                                                   |                               |                                             | 1     | 1   | seq    |
| ...  | ...gaagacugGuauguugaug...                                                                   |                               |                                             | 4     | 1   | seq    |
| ...  | ...gaagacugGuauguugaugc...                                                                  |                               |                                             | 9     | 1   | seq    |
| ...  | ...gaagacugGuauguugaugcu...                                                                 |                               |                                             | 1     | 1   | seq    |
| ...  | ...aagacugGuauguugaug...                                                                    |                               |                                             | 1     | 1   | seq    |
| ...  | ...aagacugGuauguugaugc...                                                                   |                               |                                             | 1     | 1   | seq    |
| ...  | ...aagacugGuauguugaugcu...                                                                  |                               |                                             | 1     | 1   | seq    |
| ...  | ...agacugGuauguugaugc...                                                                    |                               |                                             | 4     | 1   | seq    |

Provisional ID : MA\_103350\_6302  
Score total : 0.4  
Score for star read(s) : -1.3  
Score for read counts : 0  
Score for mfe : 0.1  
Score for randfold : 1.6  
Score for cons. seed :  
Total read count : 88  
Mature read count : 88  
Loop read count : 0  
Star read count : 0

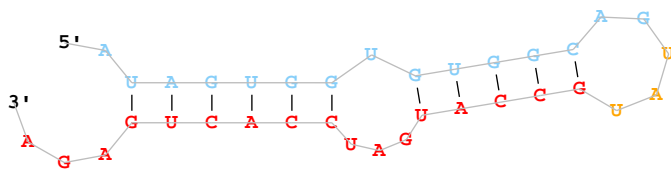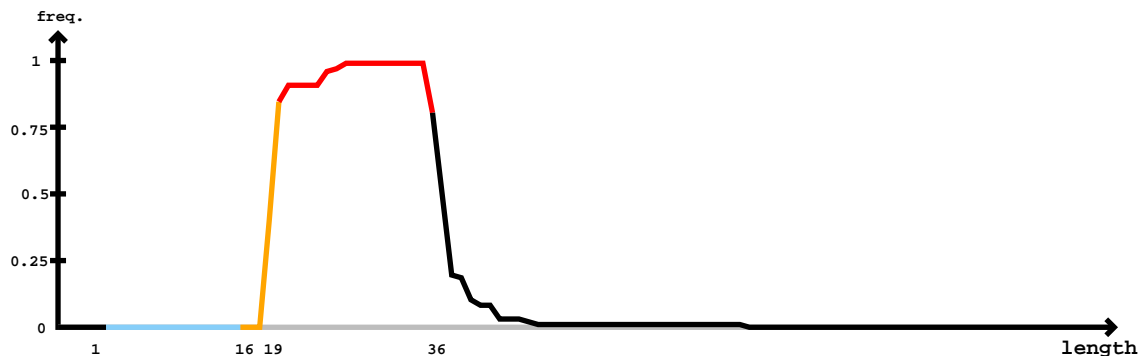

## Star Mature

| 5' -                                                                                                                 | 3' | exp | reads | mm | sample |
|----------------------------------------------------------------------------------------------------------------------|----|-----|-------|----|--------|
| aac <u>auagugguguggcag</u> uagccauagcauuccacugagauuacaucuuugucaucuggaaggaaacuacaacauuuuuuuccauccauuaucuuuuuaguuccauc |    |     |       |    |        |
| .....(((((((.....)))))).....)))).....((((.....((((((((.....)))))).....)))).....                                      |    |     |       |    |        |
| .....ugccaGgauccacugag.....                                                                                          |    |     | 1     | 1  | seq    |
| .....ugccaGgauccacugag.....                                                                                          |    |     | 13    | 0  | seq    |
| .....ugccaGgauccacugag.....                                                                                          |    |     | 1     | 1  | seq    |
| .....NgccaGgauccacugag.....                                                                                          |    |     | 1     | 1  | seq    |
| .....ugccaAgauccacugag.....                                                                                          |    |     | 2     | 1  | seq    |
| .....ugccaAgauccacugaga.....                                                                                         |    |     | 1     | 1  | seq    |
| .....ugccaGgauccacugaga.....                                                                                         |    |     | 14    | 0  | seq    |
| .....ugccaGgauccacugaga.....                                                                                         |    |     | 1     | 1  | seq    |
| .....ugccaGgauccacugagau.....                                                                                        |    |     | 3     | 0  | seq    |
| .....ugccaGgauccacugagaA.....                                                                                        |    |     | 1     | 1  | seq    |
| .....ugccaGgauccacugagauuc.....                                                                                      |    |     | 1     | 0  | seq    |
| .....gccGgauccacugaga.....                                                                                           |    |     | 1     | 1  | seq    |
| .....gccaGgauccacugaga.....                                                                                          |    |     | 6     | 1  | seq    |
| .....gccaugauccGcugaga.....                                                                                          |    |     | 1     | 1  | seq    |
| .....gccaugauccGcugaga.....                                                                                          |    |     | 24    | 0  | seq    |
| .....gccaugauccGcugagG.....                                                                                          |    |     | 1     | 1  | seq    |
| .....gccaAgauccacugaga.....                                                                                          |    |     | 2     | 1  | seq    |
| .....gccaugauccacugagau.....                                                                                         |    |     | 1     | 0  | seq    |
| .....gccaugauccacugagauu.....                                                                                        |    |     | 1     | 0  | seq    |
| .....gccaugauccacugagauuc.....                                                                                       |    |     | 4     | 0  | seq    |
| .....gccaugauccacugagauuca.....                                                                                      |    |     | 2     | 0  | seq    |
| .....ccaugauccacugagau.....                                                                                          |    |     | 3     | 0  | seq    |
| .....ccaugauccacugagauuc.....                                                                                        |    |     | 3     | 0  | seq    |
| .....gauccacugagauucaGa.....                                                                                         |    |     | 5     | 1  | seq    |
| .....auccacugagauucaGaccu.....                                                                                       |    |     | 1     | 1  | seq    |
| .....uccacugagauucaGacc.....                                                                                         |    |     | 1     | 1  | seq    |
| .....uccacugagauucaGaccuu.....                                                                                       |    |     | 1     | 1  | seq    |
| .....uuugucaucuggaaggaaacuca.....                                                                                    |    |     | 1     | 0  | seq    |

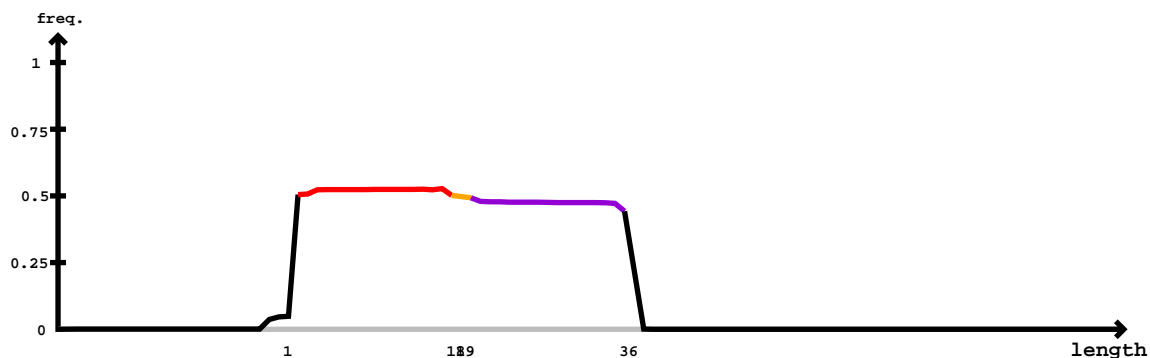

| 5' | gguagagcgcgucgcuuagcaugu                                                                            | gagagguacggggau | cga | u | accccgcaucuccacuuu | caaaaacagaccuuuu | aaauauuu | ugacauaaaaaguc | caaaaaaguuau | -3'   | obs |        |
|----|-----------------------------------------------------------------------------------------------------|-----------------|-----|---|--------------------|------------------|----------|----------------|--------------|-------|-----|--------|
|    | gguagagcgcgucgcuuagcaugu                                                                            | gagagguacggggau | cga | u | accccgcaucuccacuuu | caaaaacagaccuuuu | aaauauuu | ugacauaaaaaguc | caaaaaaguuau |       | exp |        |
|    | .(((.(((.(....)))))).)).((.(((.(((.(((.(....)))))).)))))).....(((.(((.(....(((.(....)))))))))).)).) |                 |     |   |                    |                  |          |                |              | reads | mm  | sample |
|    | gguagagcgcgucgcuuagca                                                                               |                 |     |   |                    |                  |          |                |              | 1     | 0   | seq    |
|    | .....Ngugagagguacg                                                                                  | ggga            |     |   |                    |                  |          |                |              | 1     | 1   | seq    |
|    | .....ugugagagguacg                                                                                  | ggga            |     |   |                    |                  |          |                |              | 10    | 0   | seq    |
|    | .....ugugagagguacg                                                                                  | gggG            |     |   |                    |                  |          |                |              | 1     | 1   | seq    |
|    | .....ugugagagggC                                                                                    | acggggau        | c   |   |                    |                  |          |                |              | 1     | 1   | seq    |
|    | .....ugugagagguacg                                                                                  | gAgauc          |     |   |                    |                  |          |                |              | 1     | 1   | seq    |
|    | .....uGAgaagagguacg                                                                                 | ggggau          | c   |   |                    |                  |          |                |              | 2     | 1   | seq    |
|    | .....ugugagagguacg                                                                                  | gggaUA          |     |   |                    |                  |          |                |              | 1     | 1   | seq    |
|    | .....ugugagagguacg                                                                                  | ggggau          | c   |   |                    |                  |          |                |              | 21    | 0   | seq    |
|    | .....ugugagagguacg                                                                                  | gggaU           |     |   |                    |                  |          |                |              | 1     | 1   | seq    |
|    | .....ugugagagguacg                                                                                  | ggggau          | c   |   |                    |                  |          |                |              | 8     | 0   | seq    |
|    | .....ugugagagguacg                                                                                  | gggaUA          |     |   |                    |                  |          |                |              | 1     | 1   | seq    |
|    | .....uGAgaagagguacg                                                                                 | ggggau          | c   |   |                    |                  |          |                |              | 1     | 1   | seq    |
|    | .....gugagagguacg                                                                                   | gggaUA          |     |   |                    |                  |          |                |              | 1     | 1   | seq    |
|    | .....gAgagagguacg                                                                                   | gggaUA          |     |   |                    |                  |          |                |              | 1     | 1   | seq    |
|    | .....gugagagguacg                                                                                   | gggaUA          |     |   |                    |                  |          |                |              | 1     | 1   | seq    |
|    | .....gugagagguacg                                                                                   | gggaUA          |     |   |                    |                  |          |                |              | 7     | 0   | seq    |
|    | .....gugagagguacg                                                                                   | gggaUA          |     |   |                    |                  |          |                |              | 3     | 0   | seq    |
|    | .....Agagagguacg                                                                                    | gggaUA          |     |   |                    |                  |          |                |              | 1     | 1   | seq    |
|    | .....ugagagguacg                                                                                    | gggaUA          |     |   |                    |                  |          |                |              | 1     | 1   | seq    |
|    | .....Ngagagguacg                                                                                    | gggaUA          |     |   |                    |                  |          |                |              | 1     | 1   | seq    |
|    | .....gaAagguacg                                                                                     | gggaUA          |     |   |                    |                  |          |                |              | 1     | 1   | seq    |
|    | .....gagagguacg                                                                                     | gggaUA          |     |   |                    |                  |          |                |              | 575   | 0   | seq    |
|    | .....gagUgguacg                                                                                     | gggaUA          |     |   |                    |                  |          |                |              | 1     | 1   | seq    |
|    | .....gaUagguacg                                                                                     | gggaUA          |     |   |                    |                  |          |                |              | 1     | 1   | seq    |
|    | .....gagagguac                                                                                      | Agggau          | c   |   |                    |                  |          |                |              | 2     | 1   | seq    |
|    | .....gCgagguacg                                                                                     | gggaUA          |     |   |                    |                  |          |                |              | 1     | 1   | seq    |
|    | .....gGgagguacg                                                                                     | gggaUA          |     |   |                    |                  |          |                |              | 3     | 1   | seq    |
|    | .....gagagguacg                                                                                     | gggaUA          |     |   |                    |                  |          |                |              | 4     | 1   | seq    |
|    | .....gagagguacg                                                                                     | gggaUA          |     |   |                    |                  |          |                |              | 2     | 1   | seq    |
|    | .....gagagguacg                                                                                     | gggaUA          |     |   |                    |                  |          |                |              | 2     | 1   | seq    |
|    | .....gagagguacg                                                                                     | gggaUA          |     |   |                    |                  |          |                |              | 1     | 1   | seq    |
|    | .....Nagagguacg                                                                                     | gggaUA          |     |   |                    |                  |          |                |              | 1     | 1   | seq    |



**Mature**      **Star**

|                                                                                                                        |     |   |     |
|------------------------------------------------------------------------------------------------------------------------|-----|---|-----|
| gguaagagcgucgcguuagcaugugagagguacgggggaucga <u>uaccccgcaucuccacu</u> uucaaaacagaccuuuaauauuuugacauaaaaagucuaaaaaaguuau |     |   |     |
| .....gagagguacggggCucg.....                                                                                            | 2   | 1 | seq |
| .....gagagguacggggaucU.....                                                                                            | 6   | 1 | seq |
| .....Uagagguacggggaucg.....                                                                                            | 2   | 1 | seq |
| .....gagagguGcggggaucg.....                                                                                            | 1   | 1 | seq |
| .....gagaggGacggggaucg.....                                                                                            | 2   | 1 | seq |
| .....gagagguacggggaucgC.....                                                                                           | 1   | 1 | seq |
| .....gagagguacggggaucgUu.....                                                                                          | 1   | 1 | seq |
| .....agagguacggggaucgU.....                                                                                            | 1   | 1 | seq |
| .....agagguacggggaucgC.....                                                                                            | 1   | 1 | seq |
| .....agagguacggggaucgaG.....                                                                                           | 1   | 1 | seq |
| .....gagguacggggaucgau.....                                                                                            | 7   | 0 | seq |
| .....gagguacggggaucgUu.....                                                                                            | 3   | 1 | seq |
| .....gagguacggggaucgCu.....                                                                                            | 2   | 1 | seq |
| .....gagguacggggaucgaG.....                                                                                            | 2   | 1 | seq |
| .....gagguacggggaucgGu.....                                                                                            | 2   | 1 | seq |
| .....gagguacggggaucgaua.....                                                                                           | 3   | 0 | seq |
| .....gagguacggggaucgauacc.....                                                                                         | 1   | 0 | seq |
| .....gagguacggggaucgGuaccccgca.....                                                                                    | 1   | 1 | seq |
| .....agguacggggaucgUuacc.....                                                                                          | 1   | 1 | seq |
| .....cggggaucgGuaccccg.....                                                                                            | 1   | 1 | seq |
| .....aucgCuaccccgcaucuccac.....                                                                                        | 1   | 1 | seq |
| .....ucgGuaccccgcaucucc.....                                                                                           | 1   | 1 | seq |
| .....ucgauaccccgcaucuccG.....                                                                                          | 1   | 1 | seq |
| .....ucgGuaccccgcaucucca.....                                                                                          | 1   | 1 | seq |
| .....ucgauaccccgcaucuccac.....                                                                                         | 1   | 0 | seq |
| .....ucgauaccccgcaucuccacu.....                                                                                        | 5   | 0 | seq |
| .....cgUuaccccgcaucuccac.....                                                                                          | 1   | 1 | seq |
| .....cgauaccccgcaucuccac.....                                                                                          | 2   | 0 | seq |
| .....cgGuaccccgcaucuccacu.....                                                                                         | 1   | 1 | seq |
| .....cgauaccccgcaucuccacu.....                                                                                         | 2   | 0 | seq |
| .....gauaccccgcaucucca.....                                                                                            | 1   | 0 | seq |
| .....gauaccccgcaucuccac.....                                                                                           | 3   | 0 | seq |
| .....gauaccccgcaucuccacu.....                                                                                          | 2   | 0 | seq |
| .....Cuaccccgcaucuccac.....                                                                                            | 2   | 1 | seq |
| .....auGcccgcaucuccac.....                                                                                             | 1   | 1 | seq |
| .....aAaccccgcaucuccac.....                                                                                            | 1   | 1 | seq |
| .....auaccccgcaucuccGc.....                                                                                            | 1   | 1 | seq |
| .....Guaccccgcaucuccac.....                                                                                            | 4   | 1 | seq |
| .....auaccccgcaucuccac.....                                                                                            | 21  | 0 | seq |
| .....auaccccgcauUuccac.....                                                                                            | 1   | 1 | seq |
| .....Uuaccccgcaucuccacu.....                                                                                           | 15  | 1 | seq |
| .....Cuaccccgcaucuccacu.....                                                                                           | 2   | 1 | seq |
| .....Guaccccgcaucuccacu.....                                                                                           | 2   | 1 | seq |
| .....auaccccgcaucuccacu.....                                                                                           | 17  | 0 | seq |
| .....uaccccgcaucCccacu.....                                                                                            | 1   | 1 | seq |
| .....uGcccgcaucuccacu.....                                                                                             | 5   | 1 | seq |
| .....uaccccgcaucuccCcu.....                                                                                            | 4   | 1 | seq |
| .....uaccccgcaucuccGcu.....                                                                                            | 2   | 1 | seq |
| .....uaUcccgcaucuccacu.....                                                                                            | 1   | 1 | seq |
| .....uaccccgcaucuccacG.....                                                                                            | 12  | 1 | seq |
| .....uaccccgcaAucuccacu.....                                                                                           | 1   | 1 | seq |
| .....uaccccgcaucuccUcu.....                                                                                            | 1   | 1 | seq |
| .....Gaccccgcaucuccacu.....                                                                                            | 1   | 1 | seq |
| .....Aaccccgcaucuccacu.....                                                                                            | 3   | 1 | seq |
| .....uaccccgcaucuccacu.....                                                                                            | 499 | 0 | seq |
| .....uaAcccgcaucuccacu.....                                                                                            | 1   | 1 | seq |
| .....uaccccgcaucuUcacu.....                                                                                            | 1   | 1 | seq |
| .....Caccccgcaucuccacu.....                                                                                            | 7   | 1 | seq |
| .....uaccccgcuUucuccacu.....                                                                                           | 1   | 1 | seq |
| .....uacccAGcaucuccacu.....                                                                                            | 1   | 1 | seq |
| .....Naccccgcaucuccacu.....                                                                                            | 1   | 1 | seq |
| .....uaccccgcaucuccacuu.....                                                                                           | 1   | 0 | seq |
| .....uaccccgcaucuccacuC.....                                                                                           | 1   | 1 | seq |
| .....cccgcaucuccacuCu.....                                                                                             | 1   | 1 | seq |

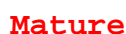[illegible]

## Star

## Mature

aauaaaacaaaucauugugauggucccugcggaugcuaacacaaaugugauuuauaaacaaaucauugugauggucccugcggaugcuaacacaaaugugauuuauaccc

|                                            |      |   |     |
|--------------------------------------------|------|---|-----|
| .....ugugaugguc <u>ccugcggaugcua</u> ..... | 6    | 0 | seq |
| .....gugaugguc <u>ccugcgga</u> .....       | 4    | 0 | seq |
| .....gugaugguc <u>ccugcggaug</u> .....     | 2    | 0 | seq |
| .....Ggugug <u>ccugcggaug</u> .....        | 2    | 1 | seq |
| .....ugaugguc <u>ccugcggaug</u> .....      | 2    | 0 | seq |
| .....Ngaugguc <u>ccugcggaug</u> .....      | 2    | 1 | seq |
| .....Ggugug <u>ccugcggaug</u> .....        | 4    | 1 | seq |
| .....ugaugguc <u>ccugcggaug</u> .....      | 8    | 0 | seq |
| .....Ngaugguc <u>ccugcggaugcu</u> .....    | 2    | 1 | seq |
| .....Agaugguc <u>ccugcggaugcu</u> .....    | 2    | 1 | seq |
| .....gugug <u>ccugcggaug</u> .....         | 2    | 1 | seq |
| .....gugug <u>ccugcggaug</u> .....         | 2    | 1 | seq |
| .....gugug <u>ccugcggaug</u> .....         | 8    | 1 | seq |
| .....Naugguc <u>ccugcggaug</u> .....       | 4    | 1 | seq |
| .....gugug <u>ccugcggaug</u> .....         | 1756 | 0 | seq |
| .....gaAgguc <u>ccugcggaug</u> .....       | 2    | 1 | seq |
| .....gugug <u>ccugcggaug</u> .....         | 10   | 1 | seq |
| .....Caugguc <u>ccugcggaug</u> .....       | 4    | 1 | seq |
| .....Aaugguc <u>ccugcggaug</u> .....       | 2    | 1 | seq |
| .....gugug <u>ccugcggaug</u> .....         | 2    | 1 | seq |
| .....gugug <u>ccugcggaug</u> .....         | 4    | 1 | seq |
| .....gugug <u>ccugcggaug</u> .....         | 86   | 1 | seq |
| .....gugug <u>ccugcggaug</u> .....         | 10   | 1 | seq |
| .....gugug <u>ccugcggaug</u> .....         | 2    | 1 | seq |
| .....gauAguc <u>ccugcggaug</u> .....       | 2    | 1 | seq |
| .....gugug <u>ccugcggaugC</u> .....        | 10   | 1 | seq |
| .....gugug <u>ccugcggaugC</u> .....        | 4    | 1 | seq |
| .....gaAgguc <u>ccugcggaugC</u> .....      | 2    | 1 | seq |
| .....gugug <u>ccugcggaugC</u> .....        | 158  | 0 | seq |
| .....gugug <u>ccugcggaugcu</u> .....       | 2    | 1 | seq |
| .....gugug <u>ccugcggaugcu</u> .....       | 2    | 1 | seq |
| .....gugug <u>ccugcggaugcu</u> .....       | 2    | 1 | seq |
| .....gugug <u>ccugcggaugcu</u> .....       | 246  | 0 | seq |
| .....gugug <u>ccugcggaugcuG</u> .....      | 18   | 1 | seq |
| .....gugug <u>ccugcggaugcuA</u> .....      | 14   | 1 | seq |
| .....gugug <u>ccugcggaugcuCa</u> .....     | 2    | 1 | seq |
| .....gugug <u>ccugcggaugcuGa</u> .....     | 2    | 1 | seq |
| .....gugug <u>ccugcggaugcu</u> .....       | 2    | 1 | seq |
| .....gugug <u>ccugcggaugcu</u> .....       | 80   | 0 | seq |
| .....gugug <u>ccugcggaugcuU</u> .....      | 18   | 1 | seq |
| .....gugug <u>ccugcggaugcu</u> .....       | 2    | 1 | seq |
| .....gugug <u>ccugcggaugcuCa</u> .....     | 2    | 1 | seq |
| .....gugug <u>ccugcggaugcuUaca</u> .....   | 2    | 1 | seq |
| .....augguc <u>ccugcggaugc</u> .....       | 68   | 0 | seq |
| .....augguU <u>ccugcggaugc</u> .....       | 2    | 1 | seq |
| .....augguc <u>ccugcggaugcu</u> .....      | 98   | 0 | seq |
| .....augguc <u>ccugcggaugcuG</u> .....     | 12   | 1 | seq |
| .....aCgguc <u>ccugcggaugcu</u> .....      | 2    | 1 | seq |
| .....augguc <u>ccugcggaugcu</u> .....      | 4    | 1 | seq |
| .....augguc <u>ccugcggaugcuCa</u> .....    | 4    | 1 | seq |
| .....augguc <u>ccugcggaugcu</u> .....      | 114  | 0 | seq |
| .....Nugguc <u>ccugcggaugcu</u> .....      | 2    | 1 | seq |
| .....augguc <u>ccugcggaugcuU</u> .....     | 38   | 1 | seq |
| .....augguc <u>ccugcggaugcu</u> .....      | 4    | 0 | seq |
| .....augguc <u>ccugcggaugcuUac</u> .....   | 2    | 1 | seq |
| .....augguc <u>ccugcggaugcu</u> .....      | 2    | 0 | seq |
| .....augguc <u>ccugcggaugcu</u> .....      | 2    | 1 | seq |
| .....ugguc <u>ccugcggaugcu</u> .....       | 16   | 1 | seq |
| .....ugguc <u>ccugcggaugcu</u> .....       | 2    | 1 | seq |
| .....ugguc <u>ccugcggaugcu</u> .....       | 1290 | 0 | seq |
| .....ugguc <u>ccugcggaugcu</u> .....       | 10   | 1 | seq |
| .....Cgguc <u>ccugcggaugcu</u> .....       | 8    | 1 | seq |
| .....ugguc <u>ccugcggaugcuG</u> .....      | 74   | 1 | seq |
| .....uAguc <u>ccugcggaugcu</u> .....       | 2    | 1 | seq |
| .....Agguc <u>ccugcggaugcu</u> .....       | 2    | 1 | seq |
| .....Ngguc <u>ccugcggaugcu</u> .....       | 2    | 1 | seq |
| .....ugguc <u>ccugcggaugcu</u> .....       | 2    | 1 | seq |
| .....uggC <u>ccugcggaugcu</u> .....        | 4    | 1 | seq |
| .....ugguc <u>ccugcggaugcu</u> .....       | 2    | 1 | seq |
| .....ugguc <u>ccugcggaugcuA</u> .....      | 70   | 1 | seq |

## Star

## Mature

|                                                                                                                                  |     |   |     |
|----------------------------------------------------------------------------------------------------------------------------------|-----|---|-----|
| aauaaaacaaaucauugugaugguc <u>ccugcggaugcuaacaca</u> aaugugauuuauaaacaaaucauugugaugguc <u>ccugcggaugcuaacaca</u> aaugugauuuauaccc |     |   |     |
| .....ugguUccugcggaugcu.....                                                                                                      | 8   | 1 | seq |
| .....uggCcccugcggaugcua.....                                                                                                     | 8   | 1 | seq |
| .....ugguccugcggaUcua.....                                                                                                       | 2   | 1 | seq |
| .....ugguccugcggaugcAa.....                                                                                                      | 4   | 1 | seq |
| .....Ggguccugcggaugcua.....                                                                                                      | 4   | 1 | seq |
| .....ugguccugcggaCgcua.....                                                                                                      | 4   | 1 | seq |
| .....Cgguccugcggaugcua.....                                                                                                      | 4   | 1 | seq |
| .....ugguccugcggaugcCa.....                                                                                                      | 14  | 1 | seq |
| .....uggucccCgcggaugcua.....                                                                                                     | 2   | 1 | seq |
| .....ugguccugcggaugcuU.....                                                                                                      | 200 | 1 | seq |
| .....ugguccugUgggaugcua.....                                                                                                     | 2   | 1 | seq |
| .....ugguccugcggaugcua.....                                                                                                      | 880 | 0 | seq |
| .....ugguccugcggaugcGa.....                                                                                                      | 2   | 1 | seq |
| .....ugguccugcggaugcuU.....                                                                                                      | 2   | 1 | seq |
| .....ugguccugcggaugcuUa.....                                                                                                     | 2   | 1 | seq |
| .....ugguccugcggaugcuCa.....                                                                                                     | 8   | 1 | seq |
| .....ugguccugcggaugcuaa.....                                                                                                     | 4   | 0 | seq |
| .....ugguccugcggaugcuaac.....                                                                                                    | 2   | 0 | seq |
| .....ugguccugcggaugcuCaca.....                                                                                                   | 2   | 1 | seq |
| .....ugguccugcggaugcuacacaauug.....                                                                                              | 2   | 0 | seq |
| .....gguccugcggaugcua.....                                                                                                       | 136 | 0 | seq |
| .....gguccugcggaugcCa.....                                                                                                       | 2   | 1 | seq |
| .....gguccugcggaugcuU.....                                                                                                       | 48  | 1 | seq |
| .....Uguccugcggaugcua.....                                                                                                       | 2   | 1 | seq |
| .....gguccugcggaugcAa.....                                                                                                       | 2   | 1 | seq |
| .....guccugcggaugcuCa.....                                                                                                       | 2   | 1 | seq |
| .....uccugcggaugcuUac.....                                                                                                       | 2   | 1 | seq |
| .....cccugcggaugcuaacCc.....                                                                                                     | 2   | 1 | seq |
| .....cauugugaugguccGg.....                                                                                                       | 2   | 1 | seq |
| .....cauugugaugguccAg.....                                                                                                       | 2   | 1 | seq |
| .....cauugugaugguccug.....                                                                                                       | 26  | 0 | seq |
| .....cauugugaugguccugc.....                                                                                                      | 2   | 0 | seq |
| .....cauugugaugguccugcg.....                                                                                                     | 10  | 0 | seq |
| .....cauugugaugguccugcgga.....                                                                                                   | 2   | 0 | seq |
| .....cauugugaugguccugcggaug.....                                                                                                 | 6   | 0 | seq |
| .....cauugugaugguccugcggaugc.....                                                                                                | 2   | 0 | seq |
| .....cauugugaugguccugcggaugcu.....                                                                                               | 4   | 0 | seq |
| .....auugugaugguccugcg.....                                                                                                      | 2   | 0 | seq |
| .....auugugaugguccugcgga.....                                                                                                    | 2   | 0 | seq |
| .....auugGgaugguccugcgga.....                                                                                                    | 2   | 1 | seq |
| .....uugugaugguccugcg.....                                                                                                       | 2   | 0 | seq |
| .....uugugaugguccugcg.....                                                                                                       | 8   | 0 | seq |
| .....uugugaugguccugcgga.....                                                                                                     | 8   | 0 | seq |
| .....uugugaugguccugcggaC.....                                                                                                    | 4   | 1 | seq |
| .....uugugaugguccugcggaU.....                                                                                                    | 6   | 0 | seq |
| .....uugGgaugguccugcgga.....                                                                                                     | 2   | 1 | seq |
| .....uugugaugguccugcggaug.....                                                                                                   | 18  | 0 | seq |
| .....uugugaugguccugcggaUa.....                                                                                                   | 4   | 1 | seq |
| .....uugugaugguccugcggaugc.....                                                                                                  | 4   | 0 | seq |
| .....uugugaugguccugcggaugcu.....                                                                                                 | 10  | 0 | seq |
| .....uugugaugguccugcggaugcuU.....                                                                                                | 2   | 1 | seq |
| .....uugugaugguccugcggaugcua.....                                                                                                | 2   | 0 | seq |
| .....ugugaugguccugcg.....                                                                                                        | 2   | 0 | seq |
| .....ugGgaugguccugcgga.....                                                                                                      | 2   | 1 | seq |
| .....ugugaugguccugcgga.....                                                                                                      | 6   | 0 | seq |
| .....ugugaugguccugcggaC.....                                                                                                     | 2   | 1 | seq |
| .....ugugaugguccugcggaug.....                                                                                                    | 16  | 0 | seq |
| .....ugGgaugguccugcggaug.....                                                                                                    | 8   | 1 | seq |
| .....ugugaugguccugcggaUa.....                                                                                                    | 2   | 1 | seq |
| .....ugugaugguccugcggaugc.....                                                                                                   | 8   | 0 | seq |
| .....ugAgaugguccugcggaugcu.....                                                                                                  | 2   | 1 | seq |
| .....ugugaugguccugcggaugcu.....                                                                                                  | 4   | 0 | seq |
| .....ugugaugguccugcggaugcua.....                                                                                                 | 6   | 0 | seq |
| .....gugaugguccugcgga.....                                                                                                       | 4   | 0 | seq |
| .....gugaugguccugcggaug.....                                                                                                     | 2   | 0 | seq |
| .....GgaugguccugcggaU.....                                                                                                       | 2   | 1 | seq |
| .....ugaugguccugcggaU.....                                                                                                       | 2   | 0 | seq |
| .....Ngaugguccugcggaug.....                                                                                                      | 2   | 1 | seq |
| .....Ggaugguccugcggaug.....                                                                                                      | 4   | 1 | seq |
| .....ugaugguccugcggaug.....                                                                                                      | 8   | 0 | seq |

## Star

## Mature

aauaaaacaaaucaugugauggucccugcggaugcuaacacaaaugugauuuauaaacaaaucaugugauggucccugcggaugcuaacacaaaugugauuuauaccc

|                                   |      |   |     |
|-----------------------------------|------|---|-----|
| .....Ngauggucccugcggaugcu.....    | 2    | 1 | seq |
| .....Agauggucccugcggaugcu.....    | 2    | 1 | seq |
| .....gauggucccugcggauc.....       | 10   | 1 | seq |
| .....gaugguccGugcggaug.....       | 2    | 1 | seq |
| .....gauggucccugcggaug.....       | 2    | 1 | seq |
| .....Cauggucccugcggaug.....       | 4    | 1 | seq |
| .....gauggucccugcggaug.....       | 1756 | 0 | seq |
| .....gaAggucccugcggaug.....       | 2    | 1 | seq |
| .....gauggAcccugcggaug.....       | 2    | 1 | seq |
| .....gauggucccugcggaGg.....       | 10   | 1 | seq |
| .....Aauggucccugcggaug.....       | 2    | 1 | seq |
| .....Nauggucccugcggaug.....       | 4    | 1 | seq |
| .....gGuggucccugcggaug.....       | 10   | 1 | seq |
| .....gauggucccugcggauA.....       | 86   | 1 | seq |
| .....gauggucccGgcggaug.....       | 4    | 1 | seq |
| .....gauggucccAgcggaug.....       | 2    | 1 | seq |
| .....gauggucccugcggaCug.....      | 4    | 1 | seq |
| .....gauggCcccugcggaug.....       | 8    | 1 | seq |
| .....gauAgucccugcggaug.....       | 2    | 1 | seq |
| .....gauggucccugcggaugc.....      | 158  | 0 | seq |
| .....gaAggucccugcggaugc.....      | 2    | 1 | seq |
| .....gauggucccugcggaugcu.....     | 2    | 1 | seq |
| .....gauggucccugcggaugcu.....     | 2    | 1 | seq |
| .....gauggucccugcggaugcG.....     | 18   | 1 | seq |
| .....gauggucccugcggauAcu.....     | 2    | 1 | seq |
| .....gGuggucccugcggaugcu.....     | 2    | 1 | seq |
| .....gauggucccugcggaugcA.....     | 14   | 1 | seq |
| .....gauggucccugcggaugcu.....     | 246  | 0 | seq |
| .....gauggucccugcggaugcGa.....    | 2    | 1 | seq |
| .....gauggucccugcggaugcuU.....    | 18   | 1 | seq |
| .....gauggucUcugcggaugcua.....    | 2    | 1 | seq |
| .....gauggucccugcggaugcua.....    | 80   | 0 | seq |
| .....gauggucccugcggaugcua.....    | 2    | 1 | seq |
| .....gauggucccugcggaugcuCa.....   | 2    | 1 | seq |
| .....gauggucccugcggaugcuUaca..... | 2    | 1 | seq |
| .....auggucccugcggaugc.....       | 68   | 0 | seq |
| .....augguUccugcggaugc.....       | 2    | 1 | seq |
| .....auggucccugcggaugcu.....      | 4    | 1 | seq |
| .....auggucccugcggaugcG.....      | 12   | 1 | seq |
| .....aCggucccugcggaugcu.....      | 2    | 1 | seq |
| .....auggucccugcggaugcu.....      | 98   | 0 | seq |
| .....auggucccugcggaugcua.....     | 114  | 0 | seq |
| .....auggucccugcggaugcuU.....     | 38   | 1 | seq |
| .....Nuggucccugcggaugcua.....     | 2    | 1 | seq |
| .....auggucccugcggaugcCa.....     | 4    | 1 | seq |
| .....auggucccugcggaugcuaa.....    | 4    | 0 | seq |
| .....auggucccugcggaugcuUac.....   | 2    | 1 | seq |
| .....auggucccugcggaugcuaacC.....  | 2    | 1 | seq |
| .....auggucccugcggaugcuaca.....   | 2    | 0 | seq |
| .....Aggucccugcggaugcu.....       | 2    | 1 | seq |
| .....ugguUccugcggaugcu.....       | 8    | 1 | seq |
| .....uggucccugcggaugcu.....       | 16   | 1 | seq |
| .....uggucccugcggauAcu.....       | 2    | 1 | seq |
| .....Nggucccugcggaugcu.....       | 2    | 1 | seq |
| .....uggCcccugcggaugcu.....       | 4    | 1 | seq |
| .....uggucccugcggaugcu.....       | 10   | 1 | seq |
| .....uggucccugcggaugcu.....       | 1290 | 0 | seq |
| .....Cggucccugcggaugcu.....       | 8    | 1 | seq |
| .....uggucccugcggaugcA.....       | 70   | 1 | seq |
| .....uggucccugcggaugcG.....       | 74   | 1 | seq |
| .....uAgucccugcggaugcu.....       | 2    | 1 | seq |
| .....uggucccugcUgaugcu.....       | 2    | 1 | seq |
| .....uggucccugcggaugGu.....       | 2    | 1 | seq |
| .....uggucccugcggaugcua.....      | 880  | 0 | seq |
| .....uggucccugcggaugcGa.....      | 2    | 1 | seq |
| .....uggCcccugcggaugcua.....      | 8    | 1 | seq |
| .....uggucccugcggaugcua.....      | 2    | 1 | seq |
| .....uggucccugcggaugcCa.....      | 14   | 1 | seq |
| .....uggucccugcggaugcuU.....      | 200  | 1 | seq |
| .....uggucccugcggaCgcua.....      | 4    | 1 | seq |

Star

## Mature

| Sequence                                                                                                                         | Count | Count | Label |
|----------------------------------------------------------------------------------------------------------------------------------|-------|-------|-------|
| aauaaaacaaaacauugugaugguc <u>ccugcggaugcu</u> aaacacaaugugauuuuaaaacaaaacauugugaugguc <u>ccugcggaugcu</u> aaacacaaugugauuuuaaccc | 4     | 1     | seq   |
| .....Gggucccugcggaugcu.....                                                                                                      | 2     | 1     | seq   |
| .....uggucccugUggaugcu.....                                                                                                      | 4     | 1     | seq   |
| .....uggucccugcggaugcAa.....                                                                                                     | 4     | 1     | seq   |
| .....Cggucccugcggaugcu.....                                                                                                      | 2     | 1     | seq   |
| .....uggucccCgcggaugcu.....                                                                                                      | 4     | 0     | seq   |
| .....uggucccugcggaugcuCa.....                                                                                                    | 8     | 1     | seq   |
| .....uggucccugcggaugcuUa.....                                                                                                    | 2     | 1     | seq   |
| .....uggucccugcggaugcuU.....                                                                                                     | 2     | 1     | seq   |
| .....uggucccugcggaugcuaac.....                                                                                                   | 2     | 0     | seq   |
| .....uggucccugcggaugcuCaca.....                                                                                                  | 2     | 1     | seq   |
| .....uggucccugcggaugcuaacacaaugug.....                                                                                           | 2     | 0     | seq   |
| .....ggucccugcggaugcCa.....                                                                                                      | 2     | 1     | seq   |
| .....ggucccugcggaugcAa.....                                                                                                      | 2     | 1     | seq   |
| .....Ugucccugcggaugcu.....                                                                                                       | 2     | 1     | seq   |
| .....ggucccugcggaugcuU.....                                                                                                      | 48    | 1     | seq   |
| .....ggucccugcggaugcu.....                                                                                                       | 136   | 0     | seq   |
| .....guccugcggaugcuCa.....                                                                                                       | 2     | 1     | seq   |
| .....uccugcggaugcuUac.....                                                                                                       | 2     | 1     | seq   |
| .....ccugcggaugcuaacCc.....                                                                                                      | 2     | 1     | seq   |

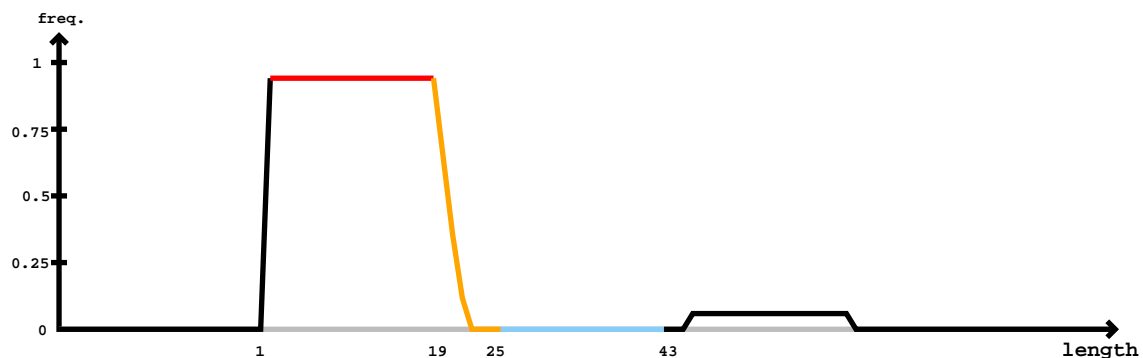

| 5'                                                                                                   | ugaaggaggguacaacaucaaacac <u>acucuggaguccuggaguccuagaucuaagccaucaaggcu</u> agagagagcucucuuaggggcucucucuguuugaucuagcaucacugu | -3' | exp |     |
|------------------------------------------------------------------------------------------------------|-----------------------------------------------------------------------------------------------------------------------------|-----|-----|-----|
| ..(((.(((.(((((((.((((((..((((((.....))))))..))))))...((((((((((((.....)))))))))))))))))).)).)).)).. |                                                                                                                             |     |     |     |
| .....cacuuggaguccuggaguu.....                                                                        | 5                                                                                                                           | 0   |     | seq |
| .....cacuuggaguccuggaguc.....                                                                        | 4                                                                                                                           | 0   |     | seq |
| .....cacuuggaguccuggaguuU.....                                                                       | 1                                                                                                                           | 1   |     | seq |
| .....cacuuggaguccuggagucA.....                                                                       | 4                                                                                                                           | 1   |     | seq |
| .....cacuuggaguccuggagucAu.....                                                                      | 2                                                                                                                           | 1   |     | seq |
| .....agagagcucucuaGaggg.....                                                                         | 1                                                                                                                           | 1   |     | seq |

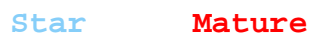





**Mature**      **Star**

| acugguagcauuc <u>auagaga</u> <b>acucgagaac</b> <u>augaa</u> <b>gaa</b> <u>guu</u> cc <u>auag</u> u <u>cuuaggu</u> uc <u>augga</u> ug <u>ucgca</u> accaccagcgcaugguugggaaaaauugggugaugugauu |     |   |     |
|--------------------------------------------------------------------------------------------------------------------------------------------------------------------------------------------|-----|---|-----|
| .....Ucucgagaac <u>augaa</u> guu.....                                                                                                                                                      | 1   | 1 | seq |
| .....Gcucgagaac <u>augaa</u> guu.....                                                                                                                                                      | 2   | 1 | seq |
| .....acucgagaac <u>augaa</u> guu.....                                                                                                                                                      | 252 | 0 | seq |
| .....acucgagaac <u>augaa</u> guC.....                                                                                                                                                      | 30  | 1 | seq |
| .....acucgagaac <u>augaa</u> gGu.....                                                                                                                                                      | 1   | 1 | seq |
| .....acucgagaac <u>augaa</u> guuu.....                                                                                                                                                     | 3   | 0 | seq |
| .....acucgagaac <u>augaa</u> guuC.....                                                                                                                                                     | 1   | 1 | seq |
| .....acucgagaac <u>augaa</u> guuuG.....                                                                                                                                                    | 1   | 1 | seq |
| .....cucgagGac <u>augaa</u> guu.....                                                                                                                                                       | 1   | 1 | seq |
| .....cucgagaac <u>aug</u> G <u>agu</u> u.....                                                                                                                                              | 1   | 1 | seq |
| .....cucgagaac <u>augaa</u> gGu.....                                                                                                                                                       | 2   | 1 | seq |
| .....cucgagaGc <u>augaa</u> guu.....                                                                                                                                                       | 1   | 1 | seq |
| .....cucgagaac <u>augaa</u> guG.....                                                                                                                                                       | 4   | 1 | seq |
| .....cucgagaac <u>augaa</u> Gguu.....                                                                                                                                                      | 1   | 1 | seq |
| .....cucgagaacG <u>uga</u> guu.....                                                                                                                                                        | 2   | 1 | seq |
| .....cucgagaac <u>uga</u> guuC.....                                                                                                                                                        | 39  | 1 | seq |
| .....cucgagaacU <u>uga</u> guu.....                                                                                                                                                        | 1   | 1 | seq |
| .....cucgagaac <u>uga</u> gGu.....                                                                                                                                                         | 3   | 1 | seq |
| .....cucgGgaac <u>uga</u> guu.....                                                                                                                                                         | 1   | 1 | seq |
| .....cucgagaac <u>uga</u> guuu.....                                                                                                                                                        | 315 | 0 | seq |
| .....cucgagaac <u>uga</u> guuA.....                                                                                                                                                        | 4   | 1 | seq |
| .....cCcgagaac <u>uga</u> guu.....                                                                                                                                                         | 1   | 1 | seq |
| .....cucgAa <u>uga</u> guu.....                                                                                                                                                            | 1   | 1 | seq |
| .....cucgagaac <u>uga</u> guuu.....                                                                                                                                                        | 3   | 0 | seq |
| .....cucgagaac <u>uga</u> guuC.....                                                                                                                                                        | 5   | 1 | seq |
| .....cucgagaac <u>uga</u> guuuGc.....                                                                                                                                                      | 9   | 1 | seq |
| .....ucgagaac <u>uga</u> guG.....                                                                                                                                                          | 1   | 1 | seq |
| .....ucgagaac <u>uga</u> guuuG.....                                                                                                                                                        | 1   | 1 | seq |
| .....cgagaac <u>uga</u> guuGc.....                                                                                                                                                         | 3   | 1 | seq |

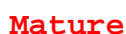

| 5' | gaccucaauguugauugaggggaauuguugucuggcucgacuucauccggauuuggguuccaauguucggauugcggagccaggccuacauucccccacaaucggagcucuu           | -3'   | obs |        |
|----|----------------------------------------------------------------------------------------------------------------------------|-------|-----|--------|
|    | gaccucaauguugauugaggggaauuguugucuggcucgacuucauccggauuuggguuccaauguucggauugcggagccaggccuacauucccccacaaucggagcucuu           |       | exp |        |
|    | (((((.....((((((((((((((.....(((((((.....((((((((((((((.....)))))).)))))).)))))).)))))).)))))).)))))).)))))).)))))).)))))) | reads | mm  | sample |
|    | .....ugauugagggggaauuguugucuggcucgacC.....                                                                                 | 1     | 1   | seq    |
|    | .....auugagggggaauuguugucu.....ac                                                                                          | 2     | 0   | seq    |
|    | .....auugagggggaauuguugucgU.....                                                                                           | 1     | 1   | seq    |
|    | .....auugagggggaauuguugucgg.....                                                                                           | 7     | 0   | seq    |
|    | .....ugagggggaauuguugucuggcucgacuu.....                                                                                    | 1     | 0   | seq    |
|    | .....gagggggaauuguugucuggcuc.....                                                                                          | 1     | 0   | seq    |
|    | .....gagggggaauuguugucuggcU.....                                                                                           | 1     | 1   | seq    |
|    | .....ggggaauguugucuggcuc.....                                                                                              | 1     | 0   | seq    |
|    | .....ggggaauguugucuggcucgacC.....                                                                                          | 1     | 1   | seq    |
|    | .....gggaauguugucuggcG.....                                                                                                | 1     | 1   | seq    |
|    | .....gggaauguugucuggcC.....                                                                                                | 4     | 1   | seq    |
|    | .....gggaauguugucuggcuc.....                                                                                               | 1     | 0   | seq    |
|    | .....gggaauguugucuggcuc.....                                                                                               | 7     | 0   | seq    |
|    | .....gggaauguugucuggcucU.....                                                                                              | 1     | 1   | seq    |
|    | .....gggaauguugucuggcucg.....                                                                                              | 7     | 0   | seq    |
|    | .....gggaauguugucuggcucga.....                                                                                             | 1     | 0   | seq    |
|    | .....gggaauguugucuggcucgac.....                                                                                            | 34    | 0   | seq    |
|    | .....gggaauguCgucuggcucgac.....                                                                                            | 1     | 1   | seq    |
|    | .....gggaauguugucuggcucgaU.....                                                                                            | 3     | 1   | seq    |
|    | .....gggaauguugucuggcGcGac.....                                                                                            | 1     | 1   | seq    |
|    | .....gggaauguugucuggcucgacC.....                                                                                           | 6     | 1   | seq    |
|    | .....gggaauguugucuggcucgacuu.....                                                                                          | 34    | 0   | seq    |
|    | .....gggaauguugucuggcucgacG.....                                                                                           | 1     | 1   | seq    |
|    | .....gggaauguugucuggcucgacA.....                                                                                           | 3     | 1   | seq    |
|    | .....ggaauguugucuggcuc.....                                                                                                | 2     | 0   | seq    |
|    | .....ggaauguugucuggcucA.....                                                                                               | 1     | 1   | seq    |
|    | .....ggaauguugucuggcucg.....                                                                                               | 17    | 0   | seq    |
|    | .....ggaauguugucuggcucga.....                                                                                              | 14    | 0   | seq    |
|    | .....ggaauguugucuggcucgG.....                                                                                              | 1     | 1   | seq    |
|    | .....ggaauguugucuggcucgac.....                                                                                             | 9     | 0   | seq    |
|    | .....ggGauguugucuggcucgacuu.....                                                                                           | 1     | 1   | seq    |
|    | .....gggaauguugucuggcucgacuu.....                                                                                          | 423   | 0   | seq    |
|    | .....gggaauguugucuggcUgacu.....                                                                                            | 2     | 1   | seq    |

Star

## Mature

|                                                                                                                     |     |   |     |
|---------------------------------------------------------------------------------------------------------------------|-----|---|-----|
| gaccucaauguugauugagggggaauuguugucuggcucgacucacauccggauuuggguuccaauguuucggauugcgcggaccaggcuucauucccccacauucggagcucuu |     |   |     |
| .....ggaauuguugucuggcucgacAuu.....                                                                                  | 1   | 1 | seq |
| .....ggaauuguugucuggcucgacG.....                                                                                    | 16  | 1 | seq |
| .....ggaauuguugucuggcucgacC.....                                                                                    | 68  | 1 | seq |
| .....ggaauuguugucuggcucgGcu.....                                                                                    | 2   | 1 | seq |
| .....ggaauuguugucuggcucgAGu.....                                                                                    | 5   | 1 | seq |
| .....ggaauuguugucuggcucgAUu.....                                                                                    | 1   | 1 | seq |
| .....ggaauuguugucuggcucGgacu.....                                                                                   | 1   | 1 | seq |
| .....ggaauuguugucCggcucgacu.....                                                                                    | 1   | 1 | seq |
| .....ggaauuguugCcgucgacgacu.....                                                                                    | 1   | 1 | seq |
| .....ggaauuguugucgAcucgacu.....                                                                                     | 1   | 1 | seq |
| .....ggaauuguugucggcuAgacu.....                                                                                     | 1   | 1 | seq |
| .....ggaauugGuugucggcucgacu.....                                                                                    | 1   | 1 | seq |
| .....ggaauuguugucuggcucgacA.....                                                                                    | 12  | 1 | seq |
| .....ggaauuguugucuggGUucgacu.....                                                                                   | 1   | 1 | seq |
| .....Agaauguugucuggcucgacu.....                                                                                     | 1   | 1 | seq |
| .....ggaauuguugucuggcucgacuuc.....                                                                                  | 2   | 0 | seq |
| .....ggaauuguugucuggcucgacuCc.....                                                                                  | 1   | 1 | seq |
| .....gaauuguugucuggcucA.....                                                                                        | 1   | 1 | seq |
| .....gaauuguugucuggcucgac.....                                                                                      | 1   | 0 | seq |
| .....gaGuuguugucuggcucgacu.....                                                                                     | 1   | 1 | seq |
| .....gaauuguugucuggcucgacu.....                                                                                     | 1   | 0 | seq |
| .....gaauuguugucuggcucgacuu.....                                                                                    | 1   | 0 | seq |
| .....gaauuguugucuggcucgacuC.....                                                                                    | 1   | 1 | seq |
| .....aauguugucuggcucgac.....                                                                                        | 1   | 0 | seq |
| .....aauguugucuggcucgacu.....                                                                                       | 1   | 0 | seq |
| .....auguugucuggcucgac.....                                                                                         | 1   | 0 | seq |
| .....ggUugcgcugcggaccaggcu.....                                                                                     | 1   | 1 | seq |
| .....gucggaccaggcuucauucc.....                                                                                      | 2   | 0 | seq |
| .....gucggaccaggcuucauuccA.....                                                                                     | 2   | 1 | seq |
| .....Cucggaccaggcuucauuccc.....                                                                                     | 1   | 1 | seq |
| .....ucggaccaggcuucGuu.....                                                                                         | 2   | 1 | seq |
| .....ucggaccaggcuucauC.....                                                                                         | 15  | 1 | seq |
| .....ucggGccaggcuucauu.....                                                                                         | 1   | 1 | seq |
| .....ucggaccaggcuucauA.....                                                                                         | 1   | 1 | seq |
| .....ucggaccaggcuucauu.....                                                                                         | 146 | 0 | seq |
| .....ucggaccaggcuucaCu.....                                                                                         | 1   | 1 | seq |
| .....ucggacUaggcuucauu.....                                                                                         | 1   | 1 | seq |
| .....ucggaccaggcuucauuc.....                                                                                        | 21  | 0 | seq |
| .....ucggaccaggcuucauuU.....                                                                                        | 4   | 1 | seq |
| .....ucggaccaggcuucauuA.....                                                                                        | 1   | 1 | seq |
| .....ucggaccaggcuucauucG.....                                                                                       | 1   | 1 | seq |
| .....ucggaccaggcuucauucU.....                                                                                       | 10  | 1 | seq |
| .....ucggaccaggcuucauuUc.....                                                                                       | 1   | 1 | seq |
| .....ucggacUaggcuucauucc.....                                                                                       | 1   | 1 | seq |
| .....ucggaUcaggcuucauucc.....                                                                                       | 1   | 1 | seq |
| .....ucAgaccaggcuucauucc.....                                                                                       | 1   | 1 | seq |
| .....ucggaccaggcuCcauucc.....                                                                                       | 1   | 1 | seq |
| .....ucggaccaggcuucauucc.....                                                                                       | 88  | 0 | seq |
| .....ucggaccaggcuucauucA.....                                                                                       | 4   | 1 | seq |
| .....ucggaccaggcuucaCucc.....                                                                                       | 1   | 1 | seq |
| .....ucggaccaggcuucauuccA.....                                                                                      | 4   | 1 | seq |
| .....ucggaUcaggcuucauuccc.....                                                                                      | 1   | 1 | seq |
| .....ucggaccaggcuucauCccc.....                                                                                      | 1   | 1 | seq |
| .....ucggacAaggcuucauuccc.....                                                                                      | 1   | 1 | seq |
| .....ucggaccaggcuucaGuccc.....                                                                                      | 1   | 1 | seq |
| .....uUggaccaggcuucauuccc.....                                                                                      | 1   | 1 | seq |
| .....ucggaccGggcuucauuccc.....                                                                                      | 1   | 1 | seq |
| .....ucggaccaggcuucauucccc.....                                                                                     | 147 | 0 | seq |
| .....ucgUaccaggcuucauuccc.....                                                                                      | 1   | 1 | seq |
| .....ucggaccaggcuCcauuccc.....                                                                                      | 1   | 1 | seq |
| .....ucCgaccaggcuucauuccc.....                                                                                      | 1   | 1 | seq |
| .....ucggaccaggcuucauucAc.....                                                                                      | 1   | 1 | seq |
| .....ucggaAcaggcuucauuccc.....                                                                                      | 1   | 1 | seq |
| .....Ncggaccaggcuucauuccc.....                                                                                      | 1   | 1 | seq |
| .....ucggacUaggcuucauucccc.....                                                                                     | 10  | 1 | seq |
| .....ucggaccaggcuucauCcccc.....                                                                                     | 40  | 1 | seq |
| .....ucggaccaggcuucUucccc.....                                                                                      | 4   | 1 | seq |
| .....Acggaccaggcuucauucccc.....                                                                                     | 7   | 1 | seq |
| .....ucggaccaggcuucaGucccc.....                                                                                     | 3   | 1 | seq |
| .....ucggaccaggcuucauuccccG.....                                                                                    | 47  | 1 | seq |

## Star

## Mature

|                                                                                                  |      |   |     |
|--------------------------------------------------------------------------------------------------|------|---|-----|
| gaccucaauguugauugaggggaauugucucggcugcagcucauuccggauuuggguuccaauugucggaugccgucggaccaggcucauuccccc | 11   | 1 | seq |
| .....ucggaccaggcucauucc                                                                          | 3    | 1 | seq |
| .....ucggaccaggcucauuccccc                                                                       | 4    | 1 | seq |
| .....ucggaccaggcucauuccccc                                                                       | 1    | 1 | seq |
| .....ucggaccaggcucauuccccc                                                                       | 1    | 1 | seq |
| .....ucggaccaggcucauuccccc                                                                       | 2    | 1 | seq |
| .....ucggaccaggcucauuccccc                                                                       | 3    | 1 | seq |
| .....ucggaccaggcucauuccccc                                                                       | 1    | 1 | seq |
| .....ucggaccaggcucauuccccc                                                                       | 8863 | 0 | seq |
| .....ucggaccaggcucauuccccc                                                                       | 1    | 1 | seq |
| .....ucggaccaggcucauuccccc                                                                       | 5    | 1 | seq |
| .....ucggaccaggcucauuccccc                                                                       | 33   | 1 | seq |
| .....ucggaccaggcucauuccccc                                                                       | 7    | 1 | seq |
| .....ucggaccaggcucauuccccc                                                                       | 20   | 1 | seq |
| .....ucggaccaggcucauuccccc                                                                       | 1    | 1 | seq |
| .....ucggaccaggcucauuccccc                                                                       | 9    | 1 | seq |
| .....ucggaccaggcucauuccccc                                                                       | 1    | 1 | seq |
| .....ucggaccaggcucauuccccc                                                                       | 7    | 1 | seq |
| .....ucggaccaggcucauuccccc                                                                       | 5    | 1 | seq |
| .....ucggaccaggcucauuccccc                                                                       | 3    | 1 | seq |
| .....ucggaccaggcucauuccccc                                                                       | 1    | 1 | seq |
| .....ucggaccaggcucauuccccc                                                                       | 10   | 1 | seq |
| .....ucggaccaggcucauuccccc                                                                       | 1444 | 1 | seq |
| .....ucggaccaggcucauuccccc                                                                       | 25   | 1 | seq |
| .....ucggaccaggcucauuccccc                                                                       | 2    | 1 | seq |
| .....ucggaccaggcucauuccccc                                                                       | 3    | 1 | seq |
| .....ucggaccaggcucauuccccc                                                                       | 9    | 1 | seq |
| .....ucggaccaggcucauuccccc                                                                       | 2    | 1 | seq |
| .....ucggaccaggcucauuccccc                                                                       | 9    | 1 | seq |
| .....ucggaccaggcucauuccccc                                                                       | 1    | 1 | seq |
| .....ucggaccaggcucauuccccc                                                                       | 4    | 1 | seq |
| .....ucggaccaggcucauuccccc                                                                       | 7    | 1 | seq |
| .....ucggaccaggcucauuccccc                                                                       | 12   | 1 | seq |
| .....ucggaccaggcucauuccccc                                                                       | 2    | 1 | seq |
| .....ucggaccaggcucauuccccc                                                                       | 34   | 1 | seq |
| .....ucggaccaggcucauuccccc                                                                       | 4    | 1 | seq |
| .....ucggaccaggcucauuccccc                                                                       | 10   | 1 | seq |
| .....ucggaccaggcucauuccccc                                                                       | 4    | 1 | seq |
| .....ucggaccaggcucauuccccc                                                                       | 323  | 1 | seq |
| .....ucggaccaggcucauuccccc                                                                       | 1    | 1 | seq |
| .....ucggaccaggcucauuccccc                                                                       | 7    | 1 | seq |
| .....ucggaccaggcucauuccccc                                                                       | 1    | 1 | seq |
| .....ucggaccaggcucauuccccc                                                                       | 1    | 1 | seq |
| .....ucggaccaggcucauuccccc                                                                       | 5    | 1 | seq |
| .....ucggaccaggcucauuccccc                                                                       | 1    | 1 | seq |
| .....ucggaccaggcucauuccccc                                                                       | 34   | 1 | seq |
| .....ucggaccaggcucauuccccc                                                                       | 2    | 1 | seq |
| .....ucggaccaggcucauuccccc                                                                       | 1    | 1 | seq |
| .....ucggaccaggcucauuccccc                                                                       | 1    | 1 | seq |
| .....ucggaccaggcucauuccccc                                                                       | 1    | 1 | seq |
| .....ucggaccaggcucauuccccc                                                                       | 1    | 1 | seq |
| .....ucggaccaggcucauuccccc                                                                       | 1    | 1 | seq |
| .....ucggaccaggcucauuccccc                                                                       | 301  | 1 | seq |
| .....ucggaccaggcucauuccccc                                                                       | 21   | 1 | seq |
| .....ucggaccaggcucauuccccc                                                                       | 38   | 0 | seq |
| .....ucggaccaggcucauuccccc                                                                       | 1    | 0 | seq |
| .....ucggaccaggcucauuccccc                                                                       | 1    | 1 | seq |
| .....ucggaccaggcucauuccccc                                                                       | 1    | 1 | seq |
| .....ucggaccaggcucauuccccc                                                                       | 6    | 0 | seq |
| .....ucggaccaggcucauuccccc                                                                       | 1    | 1 | seq |
| .....ucggaccaggcucauuccccc                                                                       | 4    | 0 | seq |
| .....ucggaccaggcucauuccccc                                                                       | 8    | 0 | seq |
| .....ucggaccaggcucauuccccc                                                                       | 5    | 1 | seq |
| .....ucggaccaggcucauuccccc                                                                       | 23   | 0 | seq |
| .....ucggaccaggcucauuccccc                                                                       | 3    | 1 | seq |
| .....ucggaccaggcucauuccccc                                                                       | 2    | 1 | seq |
| .....ucggaccaggcucauuccccc                                                                       | 1    | 0 | seq |
| .....ucggaccaggcucauuccccc                                                                       | 2    | 1 | seq |
| .....ucggaccaggcucauuccccc                                                                       | 3    | 0 | seq |

Provisional ID : MA\_10426348\_22475  
Score total : 1.3  
Score for star read(s) : -1.3  
Score for read counts : 0  
Score for mfe : 1  
Score for randfold : 1.6  
Score for cons. seed :  
Total read count : 267  
Mature read count : 267  
Loop read count : 0  
Star read count : 0

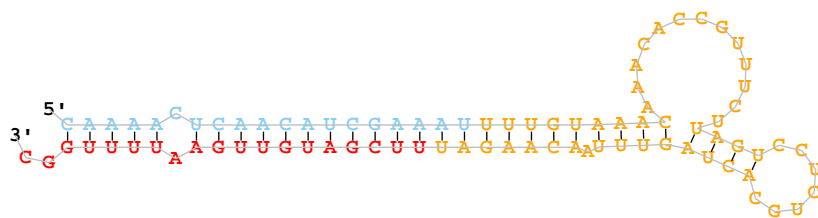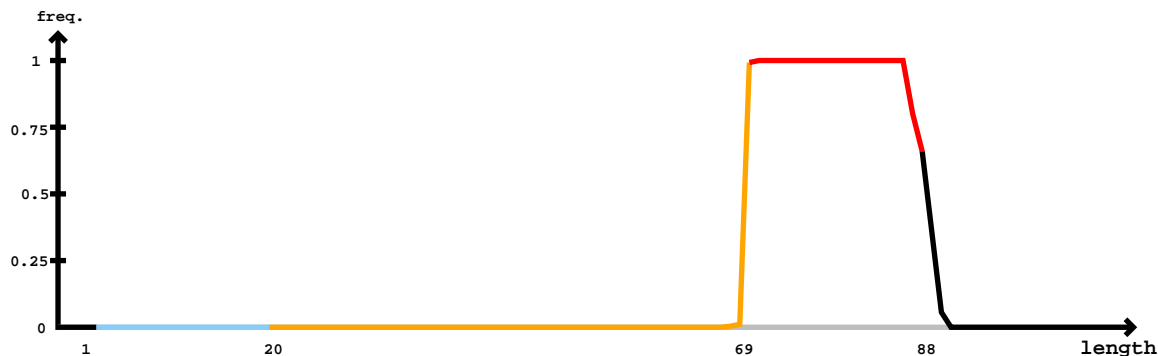

### Star

### Mature

| 5' | gucaaaacucaacaucgaaauuuuguuaaacaacacgguucuuaguccucugcacuaguuuaacaagauuucgauguugaauuuuggcgacaaggguuaacuuuauucca | -3'   | exp |        |
|----|----------------------------------------------------------------------------------------------------------------|-------|-----|--------|
|    | (((((((((((((((((((((((((((((.....(((.....)))))).)))))))))))))))))))))).....(((.....)))).....                  | reads | mm  | sample |
|    | .....Cuucgauguugaauuuuggc.....                                                                                 | 1     | 1   | seq    |
|    | .....Guucgauguugaauuuuggc.....                                                                                 | 2     | 1   | seq    |
|    | .....uucgaCguugaauuuug.....                                                                                    | 1     | 1   | seq    |
|    | .....uucgauguugaauuuug.....                                                                                    | 52    | 0   | seq    |
|    | .....uucgauguugaauuuugC.....                                                                                   | 2     | 1   | seq    |
|    | .....uucgauguugaauuuugU.....                                                                                   | 1     | 1   | seq    |
|    | .....uucgauguugGauuuugg.....                                                                                   | 1     | 1   | seq    |
|    | .....uucgauguugaauuuugg.....                                                                                   | 33    | 0   | seq    |
|    | .....uucgauguugaGauuuugg.....                                                                                  | 1     | 1   | seq    |
|    | .....uucgauguugaauuuuggc.....                                                                                  | 119   | 0   | seq    |
|    | .....Gucgauguugaauuuuggc.....                                                                                  | 2     | 1   | seq    |
|    | .....uAcgauguugaauuuuggc.....                                                                                  | 1     | 1   | seq    |
|    | .....uucgauguugaauuuugUc.....                                                                                  | 1     | 1   | seq    |
|    | .....uucgauguugaauuuuggU.....                                                                                  | 25    | 1   | seq    |
|    | .....uucgauguugaauuuuggcg.....                                                                                 | 8     | 0   | seq    |
|    | .....uucgauguugaauuuuggcgga.....                                                                               | 11    | 0   | seq    |
|    | .....uucgauguugaauuuuggcgC.....                                                                                | 2     | 1   | seq    |
|    | .....uucgGuguugaauuuuggcgga.....                                                                               | 1     | 1   | seq    |
|    | .....uucgauguugaauuuuggcgG.....                                                                                | 1     | 1   | seq    |
|    | .....ucgauguugaauuuuggc.....                                                                                   | 1     | 0   | seq    |
|    | .....ucgauguugaauuuuggU.....                                                                                   | 1     | 1   | seq    |

Provisional ID : MA\_10426798\_17777  
 Score total : 1.4  
 Score for star read(s) : -1.3  
 Score for read counts : 0  
 Score for mfe : 1.1  
 Score for randfold : 1.6  
 Score for cons. seed :  
 Total read count : 15266  
 Mature read count : 15266  
 Loop read count : 0  
 Star read count : 0

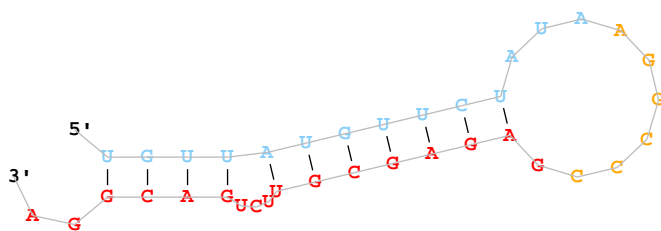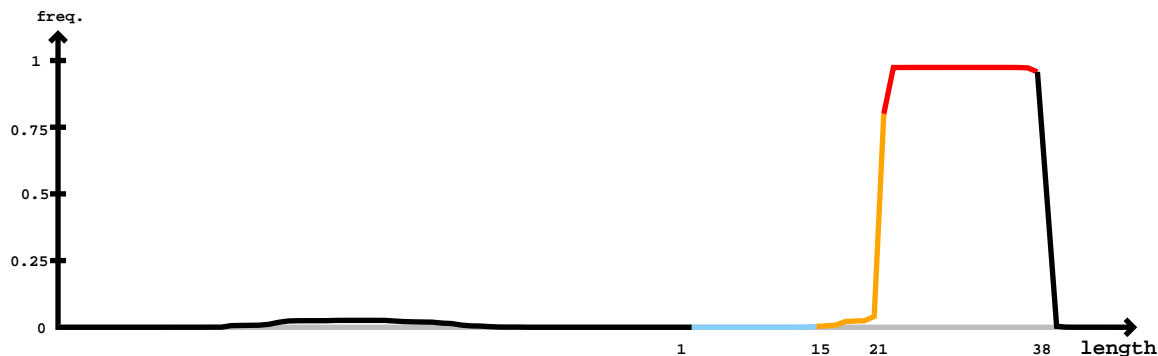

Star Mature

| 5'                                                              | Star          | Mature                           | -3' | exp | reads | mm | sample |
|-----------------------------------------------------------------|---------------|----------------------------------|-----|-----|-------|----|--------|
| uuugaucaugaccuuccuugaacagggaucuguucauagguugaacaggcucuuuacgggauc | uuuuauguuuaua | aggcccgagagcguucugacggauccguuucc |     |     |       |    |        |
| .....(((((.....))))).))))).(((((.....))))).))))).)              |               |                                  |     |     |       |    |        |
| .....accuuGcuugaacagggaucugu.....                               |               |                                  |     |     | 1     | 1  | seq    |
| .....uGcuugaacagggaucuguu.....                                  |               |                                  |     |     | 3     | 1  | seq    |
| .....uGcuugaacagggaucuguuc.....                                 |               |                                  |     |     | 1     | 1  | seq    |
| .....cuugaacagggaucuguC.....                                    |               |                                  |     |     | 3     | 1  | seq    |
| .....cuugGacagggaucuguu.....                                    |               |                                  |     |     | 1     | 1  | seq    |
| .....cuugaacagggaucuguu.....                                    |               |                                  |     |     | 29    | 0  | seq    |
| .....cuCgaacagggaucuguu.....                                    |               |                                  |     |     | 1     | 1  | seq    |
| .....cuugaacagggaucuguuA.....                                   |               |                                  |     |     | 1     | 1  | seq    |
| .....uGcuugaacagggaucuguuc.....                                 |               |                                  |     |     | 25    | 0  | seq    |
| .....cuugaacagggaucuguCc.....                                   |               |                                  |     |     | 1     | 1  | seq    |
| .....Guugaacagggaucuguuc.....                                   |               |                                  |     |     | 1     | 1  | seq    |
| .....cuugaacaggGucuguucu.....                                   |               |                                  |     |     | 1     | 1  | seq    |
| .....cuuAaacagggaucuguucu.....                                  |               |                                  |     |     | 1     | 1  | seq    |
| .....cuugaacagggaucuguucG.....                                  |               |                                  |     |     | 1     | 1  | seq    |
| .....cuugaacagggaucuguucC.....                                  |               |                                  |     |     | 1     | 1  | seq    |
| .....cuugaacagggaucuguucu.....                                  |               |                                  |     |     | 12    | 0  | seq    |
| .....cuugaacagggaucuguucua.....                                 |               |                                  |     |     | 6     | 0  | seq    |
| .....cuugaacagggaucuguucua.....                                 |               |                                  |     |     | 1     | 0  | seq    |
| .....cuugaacagggaucuguucuaagguug.....                           |               |                                  |     |     | 2     | 0  | seq    |
| .....cuugaacagggaucuguucuaagguugUaca.....                       |               |                                  |     |     | 4     | 1  | seq    |
| .....uugaacagggaucuguuc.....                                    |               |                                  |     |     | 6     | 0  | seq    |
| .....uugaacagggaucuguucua.....                                  |               |                                  |     |     | 1     | 0  | seq    |
| .....uugaacagggaucuguucua.....                                  |               |                                  |     |     | 1     | 0  | seq    |
| .....uugaacagggaucuguucuaag.....                                |               |                                  |     |     | 1     | 0  | seq    |
| .....uugaacagggaucuguucuaagguug.....                            |               |                                  |     |     | 3     | 0  | seq    |
| .....uugaacagggaucuguucuaagguugC.....                           |               |                                  |     |     | 1     | 1  | seq    |
| .....ugaacagggaucuguucu.....                                    |               |                                  |     |     | 1     | 0  | seq    |
| .....ugaacagggaucuguucua.....                                   |               |                                  |     |     | 1     | 0  | seq    |
| .....ugaacagggaucuguucuaaggu.....                               |               |                                  |     |     | 1     | 0  | seq    |
| .....ugaacagggaucuguucuaagguug.....                             |               |                                  |     |     | 2     | 0  | seq    |
| .....ugaacagggaucuguucuaagguugC.....                            |               |                                  |     |     | 2     | 0  | seq    |
| .....ugaacagggaucuguucuaagguugUaca.....                         |               |                                  |     |     | 1     | 1  | seq    |
| .....gaacagggaucuguucua.....                                    |               |                                  |     |     | 1     | 1  | seq    |
| .....gaacagggaucuguucua.....                                    |               |                                  |     |     | 2     | 0  | seq    |

Star

Mature

|                                                                   |                                                 |    |   |     |
|-------------------------------------------------------------------|-------------------------------------------------|----|---|-----|
| uuugaucaugacccuuccuugaacaggaucugucuaauagguugaacaggcucugucacgggauc | uguuuagguucuaauaggcccgagagcguucugacggauccgguucc |    |   |     |
| .....gaacaggauucguucuaauagg                                       |                                                 | 1  | 0 | seq |
| .....gaacaggauucguucuaauagguu                                     |                                                 | 1  | 0 | seq |
| .....gaacaggauucguucuaauagguug                                    |                                                 | 1  | 0 | seq |
| .....gaacaggauucguucuaauagguugG                                   |                                                 | 1  | 1 | seq |
| .....gaacaggauucguucuaauagguugUaca                                |                                                 | 1  | 1 | seq |
| .....aacaggauucguucuaC                                            |                                                 | 3  | 1 | seq |
| .....aacaggauucguucuaau                                           |                                                 | 4  | 0 | seq |
| .....aacaggauucguucuaauG                                          |                                                 | 1  | 1 | seq |
| .....aacaggauucguucuaaua                                          |                                                 | 23 | 0 | seq |
| .....aacaggauucguucuaauag                                         |                                                 | 3  | 0 | seq |
| .....aacaggauucguucuaauagg                                        |                                                 | 16 | 0 | seq |
| .....Uacaggauucguucuaauagg                                        |                                                 | 1  | 1 | seq |
| .....aacaggauucguucuaauaggu                                       |                                                 | 4  | 0 | seq |
| .....aacaggauucguucuaauaggC                                       |                                                 | 1  | 1 | seq |
| .....aacaggauucguucuaauagguug                                     |                                                 | 1  | 0 | seq |
| .....acaggauucgCucuaaua                                           |                                                 | 1  | 1 | seq |
| .....acaggauucguucuaaua                                           |                                                 | 30 | 0 | seq |
| .....acaggauucguucuaauG                                           |                                                 | 1  | 1 | seq |
| .....acaggauucguucuaauag                                          |                                                 | 19 | 0 | seq |
| .....acaggauucguucuaauaA                                          |                                                 | 1  | 1 | seq |
| .....acGggaucguucuaauagg                                          |                                                 | 1  | 1 | seq |
| .....acaggauucguucuaauagg                                         |                                                 | 31 | 0 | seq |
| .....acaggauucguucuaauaAgu                                        |                                                 | 1  | 1 | seq |
| .....acaggauucguucuaauaggu                                        |                                                 | 13 | 0 | seq |
| .....acaggauucguucuaauagguu                                       |                                                 | 3  | 0 | seq |
| .....acaggauucguucuaauagguG                                       |                                                 | 1  | 1 | seq |
| .....acaggauucguucuaauagguuA                                      |                                                 | 1  | 1 | seq |
| .....acaggauucguucuaauagguug                                      |                                                 | 13 | 0 | seq |
| .....acaggauucguucuaauagguugUaca                                  |                                                 | 4  | 1 | seq |
| .....caggauucguucuaauag                                           |                                                 | 3  | 0 | seq |
| .....caggauucguucuaauagC                                          |                                                 | 2  | 1 | seq |
| .....caggauucguucuaauagg                                          |                                                 | 32 | 0 | seq |
| .....caggauUugucuaauagg                                           |                                                 | 1  | 1 | seq |
| .....caggauucguucuaauaggu                                         |                                                 | 19 | 0 | seq |
| .....caggauucguucuaauagguu                                        |                                                 | 7  | 0 | seq |
| .....caggauCguucuaauagguug                                        |                                                 | 1  | 1 | seq |
| .....caggauucguucuaauagguug                                       |                                                 | 10 | 0 | seq |
| .....caggauucguucuaauagguugG                                      |                                                 | 1  | 1 | seq |
| .....caggauucguucuaauagguugC                                      |                                                 | 1  | 1 | seq |
| .....aggauucgCucuaauagg                                           |                                                 | 1  | 1 | seq |
| .....aggauucguucuaauagg                                           |                                                 | 7  | 0 | seq |
| .....aggauucguucuaauaggu                                          |                                                 | 5  | 0 | seq |
| .....aggauucguucuaauagguug                                        |                                                 | 1  | 0 | seq |
| .....aggauucguucuaauagguugC                                       |                                                 | 1  | 1 | seq |
| .....ggaucguucuaauagguugC                                         |                                                 | 1  | 1 | seq |
| .....aucguucuaauagguug                                            |                                                 | 1  | 0 | seq |
| .....aucguucuaauagguugC                                           |                                                 | 1  | 1 | seq |
| .....aucguucuaauagguugG                                           |                                                 | 1  | 1 | seq |
| .....ucguucuaauagguugC                                            |                                                 | 11 | 1 | seq |
| .....ucguucuaauagguugG                                            |                                                 | 3  | 1 | seq |
| .....ucGguucuaauagguuga                                           |                                                 | 1  | 1 | seq |
| .....ucguucuaauagguuga                                            |                                                 | 2  | 0 | seq |
| .....cuguucuaauagguugGa                                           |                                                 | 1  | 1 | seq |
| .....Gaaggcccgagagcguucugacgg                                     |                                                 | 1  | 1 | seq |
| .....Gaaggcccgagagcguucugacgga                                    |                                                 | 5  | 1 | seq |
| .....Gaaggcccgagagcguucugacggau                                   |                                                 | 12 | 1 | seq |
| .....aaggcccgGgagcguucugacgg                                      |                                                 | 1  | 1 | seq |
| .....aaggcccgagagcguucugacgg                                      |                                                 | 5  | 0 | seq |
| .....aaggcccgagagcguucugacggG                                     |                                                 | 1  | 1 | seq |
| .....aaggccAGagagcguucugacgga                                     |                                                 | 1  | 1 | seq |
| .....aaggcccgagagcguucugacgga                                     |                                                 | 7  | 0 | seq |
| .....aaggccAGagagcguucugacggau                                    |                                                 | 4  | 1 | seq |
| .....aaggcccgagagcguucugacgggaC                                   |                                                 | 2  | 1 | seq |
| .....aaggcccgagagcguucugacgCau                                    |                                                 | 1  | 1 | seq |
| .....aaggccGgagagcguucugacggau                                    |                                                 | 1  | 1 | seq |
| .....aaggcccgagagcguucugacggau                                    |                                                 | 9  | 0 | seq |
| .....aggcccgagagcguucC                                            |                                                 | 1  | 1 | seq |
| .....aggcccgagagcguucuga                                          |                                                 | 1  | 0 | seq |
| .....aggcccgagagcguucugacgt                                       |                                                 | 1  | 1 | seq |
| .....aggcccgagagcguucugacgA                                       |                                                 | 1  | 1 | seq |



# Star Mature

|                                                                   |                |                         |           |    |   |     |
|-------------------------------------------------------------------|----------------|-------------------------|-----------|----|---|-----|
| uuugaucaugacccuuccuugaacaggaucugucuaauagguugaacaggcucucugacgggauc | uguuuaguuucuaa | aggcccgagagcguucugacgga | uccguuucc |    |   |     |
| .....                                                             | aggccA         | gagagcguucugacgg        | .....     | 2  | 1 | seq |
| .....                                                             | aggcccg        | gagagcguucugacgg        | .....     | 6  | 0 | seq |
| .....                                                             | aggcccg        | gagagcguucugacgga       | .....     | 20 | 0 | seq |
| .....                                                             | aggccA         | gagagcguucugacgga       | .....     | 3  | 1 | seq |
| .....                                                             | aggcU          | cgagagcguucugacgga      | .....     | 1  | 1 | seq |
| .....                                                             | Nggccc         | gagagcguucugacgga       | .....     | 1  | 1 | seq |
| .....                                                             | aggcccg        | gagagcguucugacggaC      | .....     | 3  | 1 | seq |
| .....                                                             | aggcccg        | gagagcguucugacggau      | .....     | 21 | 0 | seq |
| .....                                                             | aggccA         | gagagcguucugacggau      | .....     | 5  | 1 | seq |
| .....                                                             | aggcccg        | gagaAcguucugacggau      | .....     | 1  | 1 | seq |
| .....                                                             | ggccA          | gagagcguucugacgg        | .....     | 1  | 1 | seq |
| .....                                                             | ggccc          | gagagcguucugacgg        | .....     | 1  | 0 | seq |
| .....                                                             | ggccc          | gagagcguucugacgga       | .....     | 4  | 0 | seq |
| .....                                                             | ggU            | ccgagagcguucugacgga     | .....     | 1  | 1 | seq |
| .....                                                             | ggccc          | gagaAcguucugacgga       | .....     | 1  | 1 | seq |
| .....                                                             | ggccA          | gagagcguucugacgga       | .....     | 1  | 1 | seq |
| .....                                                             | ggccA          | gagagcguucugacggau      | .....     | 1  | 1 | seq |
| .....                                                             | ggccc          | gagagcguucugacggau      | .....     | 1  | 0 | seq |
| .....                                                             | gccA           | gagagcguucugac          | .....     | 2  | 1 | seq |
| .....                                                             | gccc           | gagagcguucugacg         | .....     | 8  | 0 | seq |
| .....                                                             | gGcc           | gagagcguucugacg         | .....     | 1  | 1 | seq |
| .....                                                             | gccA           | gagagcguucugacg         | .....     | 2  | 1 | seq |
| .....                                                             | gccc           | gagagcguucugacA         | .....     | 3  | 1 | seq |
| .....                                                             | gCcG           | gagagcguucugacg         | .....     | 2  | 1 | seq |
| .....                                                             | gccc           | gagagcguucugacC         | .....     | 1  | 1 | seq |
| .....                                                             | gccc           | gagagcguucugacgg        | .....     | 60 | 0 | seq |
| .....                                                             | gCcG           | gagagcguucugacgg        | .....     | 3  | 1 | seq |
| .....                                                             | gccA           | gagagcguucugacgg        | .....     | 27 | 1 | seq |
| .....                                                             | gccc           | gagagcgCucugacgg        | .....     | 1  | 1 | seq |
| .....                                                             | gCcG           | gagagcguucugacgg        | .....     | 1  | 1 | seq |
| .....                                                             | gccc           | gagagcguucugacgU        | .....     | 1  | 1 | seq |
| .....                                                             | gccc           | gagagcguucugacgA        | .....     | 5  | 1 | seq |
| .....                                                             | gccc           | gagagcguucugacgC        | .....     | 1  | 1 | seq |
| .....                                                             | gccc           | gagagcguucugGcgg        | .....     | 1  | 1 | seq |
| .....                                                             | gcU            | cgagagcguucugacgg       | .....     | 1  | 1 | seq |
| .....                                                             | gccc           | gagaAcguucugacgg        | .....     | 2  | 1 | seq |
| .....                                                             | gGcc           | gagagcguucugacgga       | .....     | 1  | 1 | seq |
| .....                                                             | gccc           | gagagcguucugacggG       | .....     | 2  | 1 | seq |
| .....                                                             | gccc           | gagagcguucugacgga       | .....     | 46 | 0 | seq |
| .....                                                             | gccA           | gagagcguucugacgga       | .....     | 15 | 1 | seq |
| .....                                                             | gccc           | gagagcguucugacggU       | .....     | 1  | 1 | seq |
| .....                                                             | gCcG           | gagagcguucugacgga       | .....     | 7  | 1 | seq |
| .....                                                             | gcU            | cgagagcguucugacggau     | .....     | 2  | 1 | seq |
| .....                                                             | gccc           | gagaAcguucugacggau      | .....     | 3  | 1 | seq |
| .....                                                             | gccc           | gagagcguucugacggau      | .....     | 14 | 0 | seq |
| .....                                                             | gccc           | gagagcguucugacggaC      | .....     | 1  | 1 | seq |
| .....                                                             | gccc           | gagagcguucugCcgga       | .....     | 1  | 1 | seq |
| .....                                                             | gCcG           | gagagcguucugacggau      | .....     | 1  | 1 | seq |
| .....                                                             | gccA           | gagagcguucugacggau      | .....     | 2  | 1 | seq |
| .....                                                             | ccG            | gagagcguucugac          | .....     | 1  | 1 | seq |
| .....                                                             | ccc            | gagagcguucugacg         | .....     | 3  | 0 | seq |
| .....                                                             | Gcc            | gagagcguucugacgg        | .....     | 1  | 1 | seq |
| .....                                                             | ccA            | gagagcguucugacgg        | .....     | 1  | 1 | seq |
| .....                                                             | cU             | cgagagcguucugacgg       | .....     | 1  | 1 | seq |
| .....                                                             | ccc            | gagagcguucugacgA        | .....     | 1  | 1 | seq |
| .....                                                             | ccG            | gagagcguucugacgg        | .....     | 1  | 1 | seq |
| .....                                                             | ccc            | gagagcguucugacgg        | .....     | 2  | 0 | seq |
| .....                                                             | cU             | cgagagcguucugacgga      | .....     | 1  | 1 | seq |
| .....                                                             | Gcc            | gagagcguucugacgga       | .....     | 2  | 1 | seq |
| .....                                                             | ccG            | gagagcguucugacgga       | .....     | 4  | 1 | seq |
| .....                                                             | ccc            | gagagcguucugacgga       | .....     | 6  | 0 | seq |
| .....                                                             | ccc            | gagagcguucugacggau      | .....     | 3  | 0 | seq |
| .....                                                             | Gcc            | gagagcguucugacggau      | .....     | 2  | 1 | seq |
| .....                                                             | cA             | gagagcguucugacgg        | .....     | 1  | 1 | seq |
| .....                                                             | cc             | gagagcguucugacgg        | .....     | 7  | 0 | seq |
| .....                                                             | cG             | gagagcguucugacgg        | .....     | 1  | 1 | seq |
| .....                                                             | cA             | gagagcguucugacgga       | .....     | 1  | 1 | seq |
| .....                                                             | cA             | gagagcguucugacggau      | .....     | 2  | 1 | seq |
| .....                                                             | U              | cgagagcguucugacggau     | .....     | 2  | 1 | seq |
| .....                                                             | cc             | gagagcguucugacggau      | .....     | 4  | 0 | seq |

Star

Mature

uuugaucaugacccuuccuagaacaggaucugucuaauagguugaacaggcucuuacgggaucuguuuaguuucuaa**aggccc**gagagcguucugacggauccguuucc

|                               |      |   |     |
|-------------------------------|------|---|-----|
| .....cgagaAcguucugacgg.....   | 98   | 1 | seq |
| .....Ggagagcguucugacgg.....   | 2    | 1 | seq |
| .....Agagagcguucugacgg.....   | 1    | 1 | seq |
| .....cgagagcguucugacgg.....   | 5    | 0 | seq |
| .....cgagagcguucugacgga.....  | 6    | 0 | seq |
| .....cgagagcguucugacggU.....  | 1    | 1 | seq |
| .....cgUgagcguucugacgga.....  | 1    | 1 | seq |
| .....Ggagagcguucugacgga.....  | 1    | 1 | seq |
| .....cgagaAcguucugacgga.....  | 50   | 1 | seq |
| .....Ngagagcguucugacgga.....  | 1    | 1 | seq |
| .....Agagagcguucugacggau..... | 1    | 1 | seq |
| .....Ngagagcguucugacggau..... | 2    | 1 | seq |
| .....cgagaAcguucugacggau..... | 77   | 1 | seq |
| .....cgagagcguucugacggau..... | 10   | 0 | seq |
| .....cgagaAcguucugacggau..... | 2    | 1 | seq |
| .....gagagcguucugaAgga.....   | 1    | 1 | seq |
| .....gagagcguucuaAcgga.....   | 2    | 1 | seq |
| .....gagagcguucugacgga.....   | 3389 | 0 | seq |
| .....gaAagcguucugacgga.....   | 2    | 1 | seq |
| .....gagaUcguucugacgga.....   | 1    | 1 | seq |
| .....gagagcguucugacgAa.....   | 5    | 1 | seq |
| .....gagagcguucGgacgga.....   | 3    | 1 | seq |
| .....gagagcguucugCcggga.....  | 1    | 1 | seq |
| .....gaUagcguucugacgga.....   | 2    | 1 | seq |
| .....gagagcguucugacggU.....   | 31   | 1 | seq |
| .....gagagcguCcugacgga.....   | 7    | 1 | seq |
| .....gagagcguucugGcgga.....   | 11   | 1 | seq |
| .....gagagcAuuucugacgga.....  | 4    | 1 | seq |
| .....gagagUguucugacgga.....   | 3    | 1 | seq |
| .....gUgagcguucugacgga.....   | 2    | 1 | seq |
| .....gagagcguucugacUga.....   | 1    | 1 | seq |
| .....gagagGguucugacgga.....   | 1    | 1 | seq |
| .....gagagcguucugacGCa.....   | 6    | 1 | seq |
| .....gagagcguucugUcgga.....   | 2    | 1 | seq |
| .....Uagagcguucugacgga.....   | 6    | 1 | seq |
| .....gagagcguucugacGgga.....  | 1    | 1 | seq |
| .....gagaAcguucugacgga.....   | 5043 | 1 | seq |
| .....gagagcguAcugacgga.....   | 1    | 1 | seq |
| .....gagagcguucAgacgga.....   | 1    | 1 | seq |
| .....gagCgcguucugacgga.....   | 2    | 1 | seq |
| .....gagagcguGcugacgga.....   | 2    | 1 | seq |
| .....gagagcgCucugacgga.....   | 11   | 1 | seq |
| .....gagagcgAucugacgga.....   | 1    | 1 | seq |
| .....gagagcguucugacggC.....   | 4    | 1 | seq |
| .....gagagcguucugacAga.....   | 3    | 1 | seq |
| .....gGgagcguucugacgga.....   | 12   | 1 | seq |
| .....Aagagcguucugacgga.....   | 4    | 1 | seq |
| .....gagagcguucugacggG.....   | 94   | 1 | seq |
| .....gagagcguuGugacgga.....   | 1    | 1 | seq |
| .....gagaCguucugacgga.....    | 1    | 1 | seq |
| .....Nagagcguucugacgga.....   | 2    | 1 | seq |
| .....gagUgcguucugacgga.....   | 3    | 1 | seq |
| .....gagagcguucCgacgga.....   | 4    | 1 | seq |
| .....gagagcguucugacggaA.....  | 10   | 1 | seq |
| .....gagaAcguucugacggau.....  | 1909 | 1 | seq |
| .....gGgagcguucugacggau.....  | 5    | 1 | seq |
| .....gaUagcguucugacggau.....  | 1    | 1 | seq |
| .....Uagagcguucugacggau.....  | 1    | 1 | seq |
| .....gagagcguucugacggau.....  | 1325 | 0 | seq |
| .....gagagcguucugacggCu.....  | 4    | 1 | seq |
| .....gaAagcguucugacggau.....  | 1    | 1 | seq |
| .....gagagcguucugacUgau.....  | 1    | 1 | seq |
| .....gagagcgCucugacggau.....  | 1    | 1 | seq |
| .....Aagagcguucugacggau.....  | 5    | 1 | seq |
| .....gagagcguucugaUggau.....  | 2    | 1 | seq |
| .....gagUgcguucugacggau.....  | 1    | 1 | seq |
| .....Nagagcguucugacggau.....  | 4    | 1 | seq |
| .....gagagcguucugGcgga.....   | 10   | 1 | seq |
| .....gagagcguCcugacggau.....  | 4    | 1 | seq |
| .....gagagcguucCgacggau.....  | 1    | 1 | seq |

Star

Mature

uuugaucaugacccuuccuugaacaggaucuguuucuaauagguugaacaggcucuuacgggaucuguuauuguuucuaauaggcccgagagcguucugacggaucuccguuucc

|                                 |      |   |     |
|---------------------------------|------|---|-----|
| .....gagagcguucugacggGu.....    | 5    | 1 | seq |
| .....gagagcguucugacAGau.....    | 2    | 1 | seq |
| .....gagagcguucGgacggau.....    | 1    | 1 | seq |
| .....gagagUguucugacggau.....    | 3    | 1 | seq |
| .....gagagcguucugacggUu.....    | 2    | 1 | seq |
| .....gagagcguucugacgggaC.....   | 182  | 1 | seq |
| .....gagagcguucugacgggaG.....   | 20   | 1 | seq |
| .....gagaACguucugacggauC.....   | 10   | 1 | seq |
| .....gagagcguucugacgggaUG.....  | 1    | 1 | seq |
| .....gagagcguucugacgggaUA.....  | 4    | 1 | seq |
| .....gagagcguucugacgggaUU.....  | 5    | 1 | seq |
| .....gagagcguucugacgggaUC.....  | 8    | 0 | seq |
| .....agaACguucugacggau.....     | 1066 | 1 | seq |
| .....agagcAUucugacggau.....     | 2    | 1 | seq |
| .....agagcguucugGcggau.....     | 5    | 1 | seq |
| .....agagcguuGugacggau.....     | 2    | 1 | seq |
| .....agagcgCucugacggau.....     | 1    | 1 | seq |
| .....Cgagcguucugacggau.....     | 1    | 1 | seq |
| .....agagcguucugacggUu.....     | 1    | 1 | seq |
| .....agagcguucugacgggaG.....    | 30   | 1 | seq |
| .....agagcguuAugacggau.....     | 1    | 1 | seq |
| .....Ngagcguucugacggau.....     | 3    | 1 | seq |
| .....agagcguucugacgCau.....     | 1    | 1 | seq |
| .....agagcguucCgacggau.....     | 5    | 1 | seq |
| .....agagcguucugacggau.....     | 1406 | 0 | seq |
| .....agagcguucugacgggaC.....    | 196  | 1 | seq |
| .....aAagcguucugacggau.....     | 1    | 1 | seq |
| .....agagcguucugacggGu.....     | 12   | 1 | seq |
| .....agagcguucugacgggaA.....    | 11   | 1 | seq |
| .....agagcguCucugacggau.....    | 4    | 1 | seq |
| .....agagGguucugacggau.....     | 1    | 1 | seq |
| .....agagcguucugacggCu.....     | 2    | 1 | seq |
| .....agagUguucugacggau.....     | 3    | 1 | seq |
| .....agagcguucugaGggau.....     | 1    | 1 | seq |
| .....agagcgGucugacggau.....     | 1    | 1 | seq |
| .....agagcguucugacgAAu.....     | 2    | 1 | seq |
| .....agagcguucugaUggau.....     | 1    | 1 | seq |
| .....agagcguAucugacggau.....    | 2    | 1 | seq |
| .....agagcguucugacAGau.....     | 1    | 1 | seq |
| .....Ggagcguucugacggau.....     | 2    | 1 | seq |
| .....Ugagcguucugacggau.....     | 1    | 1 | seq |
| .....agaACguucugacggauC.....    | 5    | 1 | seq |
| .....agagcguucugacgggaUA.....   | 3    | 1 | seq |
| .....agagcguucugacgggaUC.....   | 11   | 0 | seq |
| .....agagcguucugacgggaUU.....   | 2    | 1 | seq |
| .....agaACguucugacgggaucC.....  | 1    | 1 | seq |
| .....agagcguucugacgggaUAAC..... | 1    | 1 | seq |
| .....gagcguucugacgggaUU.....    | 1    | 1 | seq |
| .....gagcguucugacgggauc.....    | 1    | 0 | seq |
| .....agcguucugacgggaucU.....    | 1    | 1 | seq |
| .....agcguucugacgggaucC.....    | 1    | 0 | seq |
| .....guucugacgggaucCuuu.....    | 1    | 1 | seq |

[illegible]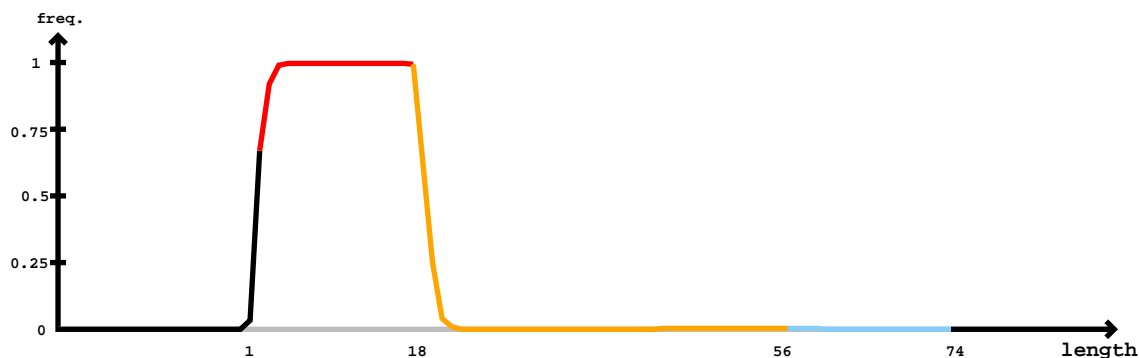

Star

[illegible]

**Mature**

**Star**

uuaucaugcuuguccuuauuuuuuugauuucuaugggggcgagccuguaaucaacgauuuaccccacucaccauccauggaucauggggaaaguauucggaggguuann

.....cccacucaccauccauC.....

1

1

seq

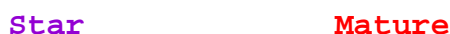[illegible]

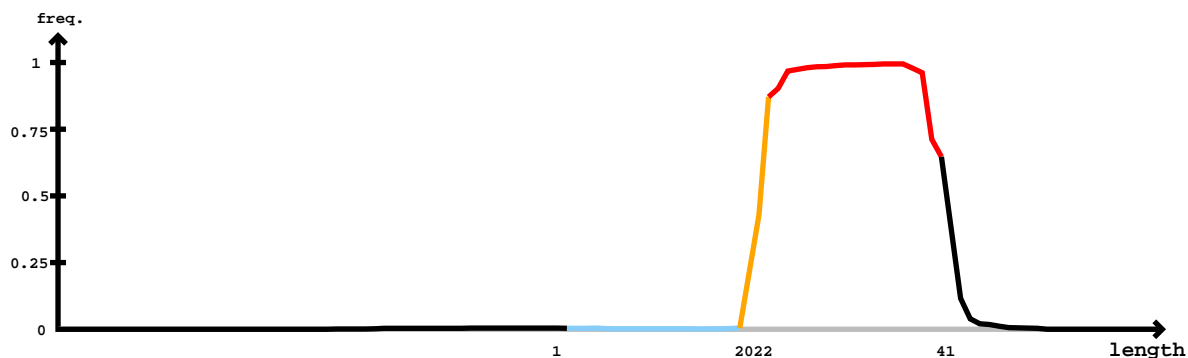[illegible]

## Mature

|                                   |     |   |     |
|-----------------------------------|-----|---|-----|
| .acuccgcaguuaaagcgcgcc.....       | 17  | 0 | seq |
| .acuccgcGguuaagcgcgccu.....       | 1   | 1 | seq |
| .acuccgcaguuaaagcgcgccG.....      | 3   | 1 | seq |
| .Ncuccgcaguuaaagcgcgccu.....      | 1   | 1 | seq |
| .acCccgcaguuaaagcgcgccu.....      | 1   | 1 | seq |
| .Geuccgcaguuaaagcgcgccu.....      | 2   | 1 | seq |
| .acuccgcaguuacGcgcgccu.....       | 1   | 1 | seq |
| .acuccgcaguuaaagcgcgccu.....      | 96  | 0 | seq |
| .acuccgcaguuaaagcgcgccA.....      | 4   | 1 | seq |
| .acuccgcaguuaaagcgcgccuu.....     | 27  | 0 | seq |
| .acuccgcaguuaaagcgcgccuG.....     | 1   | 1 | seq |
| .acuccgcUGuuaaagcgcgccuu.....     | 1   | 1 | seq |
| .acuccgcaguuaaagcgcgccuug.....    | 16  | 0 | seq |
| .acuccgcaguuaaagcCcgccuug.....    | 1   | 1 | seq |
| .Neuccgcaguuaaagcgcgccuug.....    | 1   | 1 | seq |
| .acuccgcaguuaaagcgcgccuuga.....   | 4   | 0 | seq |
| .acuccgcaguuaaagcgcgccuugUg.....  | 1   | 1 | seq |
| .acuccgcaguuaaagcgcgccuugCgc..... | 1   | 1 | seq |
| .cuccgcaguuaaUcgcc.....           | 1   | 1 | seq |
| .cuccgcaguuaaagcgAg.....          | 1   | 1 | seq |
| .cuccgcaguuaaagcgccg.....         | 119 | 0 | seq |
| .cuccgcagCUaaagcgccg.....         | 1   | 1 | seq |
| .cuccgcGaguuaaagcgccg.....        | 1   | 1 | seq |
| .cuccgcaguuaaagcgccC.....         | 2   | 1 | seq |
| .cuccgcaguuaaagcgccgc.....        | 37  | 0 | seq |
| .Nuccgcaguuaaagcgcgccu.....       | 1   | 1 | seq |
| .cuccgcaguuaaagcgcgccA.....       | 6   | 1 | seq |
| .cuccgcaguuaaagcgcgccG.....       | 9   | 1 | seq |
| .cuccgcaguuaaCcgcgccu.....        | 1   | 1 | seq |
| .cAccgcaguuaaagcgcgccu.....       | 1   | 1 | seq |
| .cuccgcaguuaaagcgcgccu.....       | 207 | 0 | seq |
| .cuccgcaguuaaagcgcgccAu.....      | 1   | 1 | seq |
| .cuccgcaguuaaagcgcgccuu.....      | 64  | 0 | seq |
| .cuccgcaguuaaagcgcgccuG.....      | 2   | 1 | seq |
| .cuccCaguuaaagcgcgccuug.....      | 1   | 1 | seq |
| .cuccgcaguuaaagcgcgccGug.....     | 1   | 1 | seq |
| .cCccgcaguuaaagcgcgccuug.....     | 1   | 1 | seq |
| .cuccgcaguuaaagcgcgccuug.....     | 26  | 0 | seq |
| .cuccgcaguuaaagcgcgccuuga.....    | 3   | 0 | seq |
| .cuccgcaguuaaagcgcgccuugU.....    | 4   | 1 | seq |
| .cuccgcaguuaaagcgcgccuugC.....    | 2   | 1 | seq |
| .cuccgcaguuaaagcgcgccuugCg.....   | 1   | 1 | seq |
| .cuccgcaguuaaagcgcgccuugCgc.....  | 1   | 1 | seq |
| .cuccgcaguuaaagcgcgccuugagc.....  | 1   | 0 | seq |
| .cuccgcaguuaaagcgcgccuugagA.....  | 1   | 1 | seq |
| .cuccgcaguuaaagcgcgccuugagcc..... | 1   | 0 | seq |
| .uccgcaguuaaagcgcgccA.....        | 2   | 1 | seq |
| .Accgcaguuaaagcgcgccu.....        | 1   | 1 | seq |
| .uccgcaguuaaagcgcgccG.....        | 3   | 1 | seq |
| .uccgcaguuaaagcgcgccu.....        | 22  | 0 | seq |
| .uccgcaguuaaagcgcgccuu.....       | 3   | 0 | seq |
| .uccgcaguuaaagcCcgccuu.....       | 1   | 1 | seq |
| .uccgcaguuaaagcgcgccuug.....      | 4   | 0 | seq |
| .ccgcaguuaaagcgcgccG.....         | 2   | 1 | seq |
| .ccgcaguuaaagcgcgccu.....         | 37  | 0 | seq |
| .ccgcaguuaaagcgcgccuu.....        | 20  | 0 | seq |
| .ccgcaguuaaagcgcgccuG.....        | 1   | 1 | seq |
| .ccgcaguuaaagcgcgccuuC.....       | 1   | 1 | seq |
| .ccgcaguuaaagcgcgccuug.....       | 8   | 0 | seq |
| .ccgcaguuaaagcgcgccuuga.....      | 1   | 0 | seq |
| .ccgcaguuaaagcgcgccuugCgc.....    | 1   | 1 | seq |
| .ccgcaguuaaagcgcgccuugagc.....    | 1   | 0 | seq |
| .ccgcaguuaaagcgcgccuugagcc.....   | 1   | 0 | seq |
| .cgccaguuaaagcgcgccuu.....        | 6   | 0 | seq |
| .cgccaguuaaagcgcgccuug.....       | 1   | 0 | seq |
| .gccaguuaaagcgcgccuug.....        | 8   | 0 | seq |
| .caguuaaagcgcgccuugU.....         | 1   | 1 | seq |
| .caguuaaagcgcgccuuga.....         | 3   | 0 | seq |
| .aguuaaagcgcgccuugUg.....         | 1   | 1 | seq |
| .guuaagcgcgccuugUgc.....          | 1   | 1 | seq |



**Mature**

|   |   |     |
|---|---|-----|
| 1 | 0 | seq |
| 1 | 1 | seq |
| 1 | 1 | seq |
| 1 | 1 | seq |
| 1 | 1 | seq |
| 1 | 1 | seq |
| 1 | 0 | seq |
| 1 | 0 | seq |
| 2 | 1 | seq |



## Star

## Mature

ggggcuuccuguguauaucauaucaagauucguuucuaccgggucauuaccccugagguaauacaggcucuugacaugguagaaacacuggaacccuccuccaugcaaugaca

|                                  |      |   |     |
|----------------------------------|------|---|-----|
| .....uugacGugguagaacac.....      | 2    | 1 | seq |
| .....Augacaugguagaacac.....      | 1    | 1 | seq |
| .....uuAacaugguagaacacu.....     | 2    | 1 | seq |
| .....Nugacaugguagaacacu.....     | 7    | 1 | seq |
| .....uugacaugguagaaUacu.....     | 1    | 1 | seq |
| .....uugacaCgguagaacacu.....     | 4    | 1 | seq |
| .....uGgacaugguagaacacu.....     | 10   | 1 | seq |
| .....uugacaugguagaacacA.....     | 42   | 1 | seq |
| .....Cugacaugguagaacacu.....     | 8    | 1 | seq |
| .....uugacaugCuagaacacu.....     | 1    | 1 | seq |
| .....uugacaugguagCacacu.....     | 1    | 1 | seq |
| .....uugacaGgguagaacacu.....     | 1    | 1 | seq |
| .....Gugacaugguagaacacu.....     | 6    | 1 | seq |
| .....uugacaAggguagaacacu.....    | 1    | 1 | seq |
| .....uugacauggCagaacacu.....     | 7    | 1 | seq |
| .....uugGcaugguagaacacu.....     | 8    | 1 | seq |
| .....uugacaugguagaacGcu.....     | 7    | 1 | seq |
| .....uugacauggAagaacacu.....     | 2    | 1 | seq |
| .....uAgacaugguagaacacu.....     | 3    | 1 | seq |
| .....uugacaugguagaUcacu.....     | 2    | 1 | seq |
| .....uugacUugguagaacacu.....     | 2    | 1 | seq |
| .....uugacaugguagaGcacu.....     | 5    | 1 | seq |
| .....uugacaugguagaacaAu.....     | 1    | 1 | seq |
| .....uugCcaugguagaacacu.....     | 1    | 1 | seq |
| .....uugacaugAuagaacacu.....     | 1    | 1 | seq |
| .....uugacaugguagaacacu.....     | 2227 | 0 | seq |
| .....uugacaugguagaacacC.....     | 370  | 1 | seq |
| .....uugacaugUuagaacacu.....     | 1    | 1 | seq |
| .....Augacaugguagaacacu.....     | 1    | 1 | seq |
| .....uugacGugguagaacacu.....     | 9    | 1 | seq |
| .....uugacaugguUgaacacu.....     | 2    | 1 | seq |
| .....uugacaugguagaacacAg.....    | 6    | 1 | seq |
| .....uugacaugguagaacacug.....    | 1310 | 0 | seq |
| .....uugacaugguagaGcacug.....    | 5    | 1 | seq |
| .....Cugacaugguagaacacug.....    | 4    | 1 | seq |
| .....uugacaugguagaacacuC.....    | 9    | 1 | seq |
| .....uugacUugguagaacacug.....    | 1    | 1 | seq |
| .....uugacaugguagaacGcug.....    | 6    | 1 | seq |
| .....uugacauggAagaacacug.....    | 1    | 1 | seq |
| .....uugacauggCagaacacug.....    | 3    | 1 | seq |
| .....uugaGaugguagaacacug.....    | 1    | 1 | seq |
| .....uugacauAguagaacacug.....    | 1    | 1 | seq |
| .....uuAacaugguagaacacug.....    | 1    | 1 | seq |
| .....uugacaAggguagaacacug.....   | 3    | 1 | seq |
| .....uugacaugguGgaacacug.....    | 5    | 1 | seq |
| .....uugacaugguCgaacacug.....    | 1    | 1 | seq |
| .....uugacaugguagaacacuU.....    | 66   | 1 | seq |
| .....Augacaugguagaacacug.....    | 1    | 1 | seq |
| .....uugacaugguagaacacCg.....    | 11   | 1 | seq |
| .....uugGcaugguagaacacug.....    | 4    | 1 | seq |
| .....uugacaCgguagaacacug.....    | 2    | 1 | seq |
| .....uugacGugguagaacacug.....    | 5    | 1 | seq |
| .....uugUcaugguagaacacug.....    | 1    | 1 | seq |
| .....uugacaugguagaacacuA.....    | 57   | 1 | seq |
| .....Gugacaugguagaacacug.....    | 1    | 1 | seq |
| .....uGgacaugguagaacacug.....    | 6    | 1 | seq |
| .....uugacaugguagGacacug.....    | 7    | 1 | seq |
| .....uugacaugguagaacacGg.....    | 5    | 1 | seq |
| .....Nugacaugguagaacacug.....    | 1    | 1 | seq |
| .....uuUacaugguagaacacug.....    | 1    | 1 | seq |
| .....uugCcaugguagaacacug.....    | 1    | 1 | seq |
| .....uugacaugguagaacacugA.....   | 115  | 1 | seq |
| .....uugGcaugguagaacacuggg.....  | 2    | 1 | seq |
| .....uugacaugguagaacGcugg.....   | 9    | 1 | seq |
| .....uugacaugguaCaacacuggg.....  | 1    | 1 | seq |
| .....uugacaugguagaacacCgg.....   | 4    | 1 | seq |
| .....uugacaugguagaGcacugg.....   | 6    | 1 | seq |
| .....uugacGugguagaacacuggg.....  | 4    | 1 | seq |
| .....Augacaugguagaacacuggg.....  | 1    | 1 | seq |
| .....uugacaAggguagaacacuggg..... | 1    | 1 | seq |

## Star

## Mature

ggggcuuccuguguauaucauaucaagauucuguuucuaccgggucauuaccccgagguaauacagggcucuugacaugguagaaacacuggaaccuccuccaugcaaugaca

|                                    |      |   |     |
|------------------------------------|------|---|-----|
| .....uugacaugguagaacacGgg.....     | 4    | 1 | seq |
| .....uugacaugguagaaUacugg.....     | 1    | 1 | seq |
| .....uuAacaugguagaacacacugg.....   | 1    | 1 | seq |
| .....uugacauggGagaacacacugg.....   | 2    | 1 | seq |
| .....uGgacaugguagaacacacugg.....   | 4    | 1 | seq |
| .....Nugacaugguagaacacacugg.....   | 3    | 1 | seq |
| .....uugacauUguagaacacacugg.....   | 1    | 1 | seq |
| .....uugacaugguagaacacacugg.....   | 1733 | 0 | seq |
| .....uugacaugguagaacacugU.....     | 21   | 1 | seq |
| .....uugacaugguagaaGacugg.....     | 2    | 1 | seq |
| .....uugacaugguagaacacugC.....     | 21   | 1 | seq |
| .....uugacaCgguagaacacacugg.....   | 3    | 1 | seq |
| .....uugacaugguagUacacugg.....     | 1    | 1 | seq |
| .....uugacaugguagaacacuAg.....     | 8    | 1 | seq |
| .....Cugacaugguagaacacacugg.....   | 4    | 1 | seq |
| .....uugacauggguGgaacacacugg.....  | 5    | 1 | seq |
| .....uugacaugguagaacacAgg.....     | 1    | 1 | seq |
| .....uugacaugguCGaacacacugg.....   | 1    | 1 | seq |
| .....uugacaugguagaacacuUg.....     | 2    | 1 | seq |
| .....uugacaugguagGacacugg.....     | 3    | 1 | seq |
| .....uugacauggCagaacacacugg.....   | 8    | 1 | seq |
| .....Gugacaugguagaacacacugg.....   | 1    | 1 | seq |
| .....uugacauAguagaacacacugg.....   | 1    | 1 | seq |
| .....uugacauAguagaacacacugga.....  | 1    | 1 | seq |
| .....uugacaugguagaacacacuggC.....  | 5    | 1 | seq |
| .....uugacaugguagaacacuCga.....    | 2    | 1 | seq |
| .....uugGcaugguagaacacacugga.....  | 7    | 1 | seq |
| .....uugacaCgguagaacacacugga.....  | 5    | 1 | seq |
| .....uugacaugguagaacacacugga.....  | 2231 | 0 | seq |
| .....Augacaugguagaacacacugga.....  | 3    | 1 | seq |
| .....uugacaugguagaacaAugga.....    | 1    | 1 | seq |
| .....uugacaugguagaUcacugga.....    | 3    | 1 | seq |
| .....uugacaugAugaacaacacugga.....  | 1    | 1 | seq |
| .....uugacaugguagGacacugga.....    | 4    | 1 | seq |
| .....uugacaugguagaacacacugUa.....  | 1    | 1 | seq |
| .....uugacaugguagaacacacAgga.....  | 3    | 1 | seq |
| .....uugacaugguagaacacacuAga.....  | 1    | 1 | seq |
| .....uugacaugguagaacCcugga.....    | 1    | 1 | seq |
| .....uugacaugguagaacGcugga.....    | 10   | 1 | seq |
| .....Nugacaugguagaacacacugga.....  | 4    | 1 | seq |
| .....uugacaugguagaacacacuggG.....  | 77   | 1 | seq |
| .....uugacaugguagaacacacuggU.....  | 19   | 1 | seq |
| .....uGgacaugguagaacacacugga.....  | 8    | 1 | seq |
| .....uuUacaugguagaacacacugga.....  | 2    | 1 | seq |
| .....uugacaugguagaGcacugga.....    | 6    | 1 | seq |
| .....Cugacaugguagaacacacugga.....  | 6    | 1 | seq |
| .....uugacaugguagaacacCgga.....    | 4    | 1 | seq |
| .....uugacaugguagUacacugga.....    | 2    | 1 | seq |
| .....uugacCugguagaacacacugga.....  | 1    | 1 | seq |
| .....Gugacaugguagaacacacugga.....  | 3    | 1 | seq |
| .....uugacauggCagaacacacugga.....  | 6    | 1 | seq |
| .....uugacauggguGgaacacacugga..... | 7    | 1 | seq |
| .....uugacaugguagaacaUugga.....    | 1    | 1 | seq |
| .....uAgacaugguagaacacacugga.....  | 1    | 1 | seq |
| .....uugacaugguagCacacugga.....    | 1    | 1 | seq |
| .....uugacaugguagaacacugAa.....    | 6    | 1 | seq |
| .....uugacaugguagaacacugCa.....    | 4    | 1 | seq |
| .....uugacGugguagaacacacugga.....  | 10   | 1 | seq |
| .....uugacUugguagaacacuggaa.....   | 2    | 1 | seq |
| .....uugacGugguagaacacuggaa.....   | 47   | 1 | seq |
| .....uugacaugguagaacacuCgaa.....   | 3    | 1 | seq |
| .....uugacauggguCgaacacuggaa.....  | 2    | 1 | seq |
| .....uuUacaugguagaacacacuggaa..... | 2    | 1 | seq |
| .....uugacaugguagaacUcuggaa.....   | 2    | 1 | seq |
| .....uugacaugguUgaacacacuggaa..... | 7    | 1 | seq |
| .....uugacaugguagaaUacuggaa.....   | 7    | 1 | seq |
| .....uugacaugguagaacacacugAaa..... | 7    | 1 | seq |
| .....uugacaugguagaacacGggaa.....   | 5    | 1 | seq |
| .....uugacaugUaagaacacacuggaa..... | 4    | 1 | seq |
| .....uugacauggAagaacacacuggaa..... | 6    | 1 | seq |

## Star

## Mature

ggggcuuccuguguauaucaucaagauucguuucuaaccgggucuuaccccugagguaauacaggcucuuugacauagguaaaccucccaugcaaugaca

|                                       |       |   |     |
|---------------------------------------|-------|---|-----|
| .....uugacauaggCagaacacuggaa.....     | 36    | 1 | seq |
| .....uugGcaugguagaacacuggaa.....      | 56    | 1 | seq |
| .....uugacauagguaGCaacacuggaa.....    | 1     | 1 | seq |
| .....uugacauagguaGaaGcuggaa.....      | 36    | 1 | seq |
| .....AugacauagguaGaaacacuggaa.....    | 14    | 1 | seq |
| .....uugacaCGguagaacacuggaa.....      | 23    | 1 | seq |
| .....uugacauGauagaacacacuggaa.....    | 11    | 1 | seq |
| .....uugacauagguaGaaacacuUgaa.....    | 3     | 1 | seq |
| .....uugacauagguaGaaacacAggaa.....    | 7     | 1 | seq |
| .....CugacauagguaGaaacacuggaa.....    | 39    | 1 | seq |
| .....uGgacauagguaGaaacacuggaa.....    | 2     | 1 | seq |
| .....uugacauaggGagaacacuggaa.....     | 3     | 1 | seq |
| .....uugacauaggGgaacacuggaa.....      | 41    | 1 | seq |
| .....uugacauagguaGaaacacuggaU.....    | 62    | 1 | seq |
| .....uugUcaugguaGaaacacuggaa.....     | 10    | 1 | seq |
| .....uugacauagguaUaaacacuggaa.....    | 1     | 1 | seq |
| .....uugacauagguaGaaacacuAgaa.....    | 10    | 1 | seq |
| .....uugacauagguaGaaacacugUaa.....    | 3     | 1 | seq |
| .....uAgacauagguaGaaacacuggaa.....    | 2     | 1 | seq |
| .....uugacauUguagaacacacuggaa.....    | 3     | 1 | seq |
| .....GuagacauagguaGaaacacuggaa.....   | 13    | 1 | seq |
| .....uugacauagguaGaaacacCggaa.....    | 31    | 1 | seq |
| .....uugacauagguaGaaacacuggaa.....    | 13172 | 0 | seq |
| .....uugCcaugguaGaaacacuggaa.....     | 2     | 1 | seq |
| .....uugacauagguaGaaAacuggaa.....     | 2     | 1 | seq |
| .....uugacauagguaGaaacacuggUa.....    | 11    | 1 | seq |
| .....uugacauagguaGaaGacacuggaa.....   | 46    | 1 | seq |
| .....uugaGauagguaGaaacacuggaa.....    | 4     | 1 | seq |
| .....NugacauagguaGaaacacuggaa.....    | 19    | 1 | seq |
| .....uugacauAguaGaaacacuggaa.....     | 10    | 1 | seq |
| .....uugacauagguaGaaacaUuggaa.....    | 4     | 1 | seq |
| .....uugacauagguaGaaacacugCaa.....    | 3     | 1 | seq |
| .....uugacauagguaGaaacacuggGa.....    | 105   | 1 | seq |
| .....uugacCugguaGaaacacuggaa.....     | 2     | 1 | seq |
| .....uugacauagguaGaaGacuggaa.....     | 2     | 1 | seq |
| .....uugacauagguaGaaUcacuggaa.....    | 3     | 1 | seq |
| .....uugaAaugguaGaaacacuggaa.....     | 2     | 1 | seq |
| .....uugacaAgguagaGaaacacuggaa.....   | 7     | 1 | seq |
| .....uugacauagguaGaaacacuggCa.....    | 5     | 1 | seq |
| .....uugacauagguaGaaUacacuggaa.....   | 3     | 1 | seq |
| .....uugacauagguaGaaGcacuggaa.....    | 43    | 1 | seq |
| .....uugacauagguaGaaCcacuggaa.....    | 2     | 1 | seq |
| .....uugacauagguaGaaacaAuggaa.....    | 3     | 1 | seq |
| .....uugacauagguaGaaacCcuggaa.....    | 2     | 1 | seq |
| .....uugacauagguaGaaacacuggaG.....    | 230   | 1 | seq |
| .....uuAacaugguaGaaacacuggaa.....     | 7     | 1 | seq |
| .....uGgacauagguaGaaacacuggaa.....    | 47    | 1 | seq |
| .....uugacauGcuagaGaaacacuggaa.....   | 1     | 1 | seq |
| .....uugacauagguaGaaacacuggaC.....    | 7     | 1 | seq |
| .....uugacauagguaGaaacGcuggaaC.....   | 1     | 1 | seq |
| .....uugacauagguaGaaAacuggaaC.....    | 1     | 1 | seq |
| .....uugacauagguaGaaacacuggaaU.....   | 104   | 1 | seq |
| .....uuAacaugguaGaaacacuggaaC.....    | 1     | 1 | seq |
| .....uugacauagguaGaaacacuggaUc.....   | 5     | 1 | seq |
| .....uugacauagguaGaaacacuggaCc.....   | 1     | 1 | seq |
| .....uugacauagguaGaaacacuggaaA.....   | 114   | 1 | seq |
| .....uugacauagguaGaaacacuggaaC.....   | 50    | 0 | seq |
| .....uugacauagguaGaaacacuggaaG.....   | 13    | 1 | seq |
| .....uugacauagguaGaaacacuggaaCA.....  | 6     | 1 | seq |
| .....uugacauagguaGaaacacuggaaCC.....  | 17    | 0 | seq |
| .....uugacauagguaGaaacacuggaaAC.....  | 1     | 1 | seq |
| .....uugacauagguaGaaacacuggaaGC.....  | 2     | 1 | seq |
| .....uugacauagguaGaaacacuggaaUC.....  | 10    | 1 | seq |
| .....uugacauagguaGaaacacuggaUcc.....  | 1     | 1 | seq |
| .....uugacauagguaGaaacacuggaaCU.....  | 10    | 1 | seq |
| .....uugacauagguaGaaacacuggaaAC.....  | 1     | 1 | seq |
| .....uugacauagguaGaaacacuggaaACC..... | 1     | 1 | seq |
| .....uugacauagguaGaaacacuggaaCCG..... | 1     | 1 | seq |
| .....uugacauagguaGaaacacuggaaUcc..... | 3     | 1 | seq |
| .....uugacauagguaGaaacacuggaaCCA..... | 16    | 1 | seq |

## Star

## Mature

ggggcuuccuguguauaucauaucaagauucuguuucuaaccgggucauuaccccugagguaauacaggcucuugacaugguagaaacacuggaaccuccuccaugcaaugaca

|                                                 |     |   |     |
|-------------------------------------------------|-----|---|-----|
| .....uugacaugguagaacacuggaaccU.....             | 1   | 1 | seq |
| .....uugacaugguagaacacuggaacA <u>cu</u> .....   | 1   | 1 | seq |
| .....uugacaugguagaacacacuggaacU <u>cu</u> ..... | 1   | 1 | seq |
| .....uugacaugguagaacacuggaacc <u>ccGc</u> ..... | 1   | 1 | seq |
| .....uugacaugguagaacacuggaacc <u>ucc</u> .....  | 1   | 0 | seq |
| .....uugacaugguagaacacuggaacc <u>ucU</u> .....  | 1   | 1 | seq |
| .....ugacUugguagaac <u>acu</u> .....            | 1   | 1 | seq |
| .....ugacaugguagaac <u>acA</u> .....            | 1   | 1 | seq |
| .....ugacaugguagaac <u>acu</u> .....            | 19  | 0 | seq |
| .....ugacaugguagaac <u>acC</u> .....            | 5   | 1 | seq |
| .....ugacaugguagaac <u>acuA</u> .....           | 2   | 1 | seq |
| .....ugacaugguagaac <u>acug</u> .....           | 45  | 0 | seq |
| .....ugacaugguagaac <u>acA<u>g</u></u> .....    | 1   | 1 | seq |
| .....ugacauggu <u>C</u> gaac <u>acug</u> .....  | 1   | 1 | seq |
| .....ugacaugguagaac <u>acCg</u> .....           | 1   | 1 | seq |
| .....ugacaugguagaac <u>acugg</u> .....          | 35  | 0 | seq |
| .....ugacaugguagaac <u>acugU</u> .....          | 2   | 1 | seq |
| .....Cgacaugguagaac <u>acugga</u> .....         | 1   | 1 | seq |
| .....ugacaugguagaac <u>acugG</u> .....          | 2   | 1 | seq |
| .....ugacaugguagaac <u>acugga</u> .....         | 52  | 0 | seq |
| .....ugacaugguagaac <u>acuggaG</u> .....        | 1   | 1 | seq |
| .....ugacaugguagaac <u>acugga</u> .....         | 18  | 0 | seq |
| .....ugacaugguagaac <u>acuggaA</u> .....        | 3   | 1 | seq |
| .....ugacaugguagaac <u>acuggaac</u> .....       | 12  | 0 | seq |
| .....ugacaugguagaac <u>acuggaA</u> .....        | 1   | 1 | seq |
| .....ugacaugguagaac <u>acuggaU</u> .....        | 52  | 1 | seq |
| .....gacaugguagaac <u>acuA</u> .....            | 1   | 1 | seq |
| .....gacaugguagaac <u>acug</u> .....            | 41  | 0 | seq |
| .....gacaugguagaac <u>acugg</u> .....           | 100 | 0 | seq |
| .....gacaugguagaac <u>acugA</u> .....           | 3   | 1 | seq |
| .....gacaugguagaac <u>acUugg</u> .....          | 1   | 1 | seq |
| .....gacaugguagaac <u>acuA<u>g</u></u> .....    | 2   | 1 | seq |
| .....Aacaugguagaac <u>acugg</u> .....           | 1   | 1 | seq |
| .....gacaugguagaac <u>acCg</u> .....            | 1   | 1 | seq |
| .....gGcaugguagaac <u>acugg</u> .....           | 1   | 1 | seq |
| .....gacaugguagaac <u>acugga</u> .....          | 39  | 0 | seq |
| .....gacaugguUgaac <u>acugga</u> .....          | 1   | 1 | seq |
| .....gacaugguagaac <u>acuggG</u> .....          | 1   | 1 | seq |
| .....gacaugguagaac <u>acugga</u> .....          | 6   | 0 | seq |
| .....gacaugguagaac <u>acuggaCc</u> .....        | 1   | 1 | seq |
| .....acaugguagaac <u>acugg</u> .....            | 11  | 0 | seq |
| .....acaugguagaacG <u>cugg</u> .....            | 1   | 1 | seq |
| .....acaugguagaac <u>acugA</u> .....            | 1   | 1 | seq |
| .....acaugguagaacG <u>cugga</u> .....           | 1   | 1 | seq |
| .....acaugguagaac <u>acugga</u> .....           | 16  | 0 | seq |
| .....Gcaugguagaac <u>acugga</u> .....           | 1   | 1 | seq |
| .....acaugguagaac <u>acugga</u> .....           | 4   | 0 | seq |
| .....acaugguagaac <u>acuggaA</u> .....          | 1   | 1 | seq |
| .....acaugguagaac <u>acuggaac</u> .....         | 1   | 0 | seq |
| .....acaugguagaac <u>acuggaUc</u> .....         | 2   | 1 | seq |
| .....acaugguagaac <u>acuggaacc</u> .....        | 43  | 0 | seq |
| .....acaugAua <u>gaacacuggaacc</u> .....        | 1   | 1 | seq |
| .....acaugguagaac <u>acuggaacA</u> .....        | 2   | 1 | seq |
| .....acaugguagaac <u>acuggaacU</u> .....        | 7   | 1 | seq |
| .....Gcaugguagaac <u>acuggaacc</u> .....        | 2   | 1 | seq |
| .....acaugguagaacG <u>cuggaacc</u> .....        | 1   | 1 | seq |
| .....acaugguagaac <u>acuggaaccU</u> .....       | 12  | 1 | seq |
| .....acaugguagaac <u>acuggaaccA</u> .....       | 1   | 1 | seq |
| .....acaugguagaac <u>acuggaacc</u> .....        | 37  | 0 | seq |
| .....acaugguagaac <u>acuggaaccuU</u> .....      | 1   | 1 | seq |
| .....caugguagaac <u>acugga</u> .....            | 17  | 0 | seq |
| .....caugguagGac <u>acugga</u> .....            | 1   | 1 | seq |
| .....caugguagaac <u>acugga</u> .....            | 6   | 0 | seq |
| .....caugguaga <u>U</u> ac <u>acugga</u> .....  | 1   | 1 | seq |
| .....caugguagaac <u>acuggGa</u> .....           | 1   | 1 | seq |
| .....caugguagaac <u>acuggaac</u> .....          | 1   | 0 | seq |
| .....caugguagaac <u>acuggaaccU</u> .....        | 3   | 1 | seq |
| .....caugguagaac <u>acuggaacc</u> .....         | 6   | 0 | seq |
| .....caugguagaac <u>acuggaaccA</u> .....        | 1   | 1 | seq |
| .....caugguagaac <u>acuggaUcc</u> .....         | 2   | 1 | seq |

Star

Mature

|                              |                                             |                                            |   |   |     |
|------------------------------|---------------------------------------------|--------------------------------------------|---|---|-----|
| ggggcuuccuguguauaucauaucaaga | uucuguuucuaaccgggucuuaccccugagguaauacaggcuc | uugacaugguagaacacuggaacccuccuccaugcaaugaca |   |   |     |
| .....                        | caugguagaacacuggaacccC.....                 |                                            | 1 | 1 | seq |
| .....                        | caugguagaacacuggaacccu.....                 |                                            | 3 | 0 | seq |
| .....                        | caugguagaacacuggGacccu.....                 |                                            | 1 | 1 | seq |
| .....                        | caugguagaacacuggaacccA.....                 |                                            | 1 | 1 | seq |
| .....                        | caugguagaacacuggaaUccu.....                 |                                            | 1 | 1 | seq |
| .....                        | caugguagaacacuggaaUccuc.....                |                                            | 4 | 1 | seq |
| .....                        | caugguagaacacuggaaUccucc.....               |                                            | 1 | 1 | seq |
| .....                        | augguagaacacuggGa.....                      |                                            | 1 | 1 | seq |
| .....                        | augguagaacacuggaa.....                      |                                            | 7 | 0 | seq |
| .....                        | augguagaacacuggaaUccu.....                  |                                            | 1 | 1 | seq |
| .....                        | ugguagaacacuggaac.....                      |                                            | 1 | 0 | seq |
| .....                        | ugguagaacacuggaaUccu.....                   |                                            | 1 | 1 | seq |
| .....                        | ugguagaacacuggaacccuU.....                  |                                            | 2 | 1 | seq |
| .....                        | gCagaacacuggaacccu.....                     |                                            | 1 | 1 | seq |
| .....                        | uagaacacuggaacccuUcucc.....                 |                                            | 4 | 1 | seq |

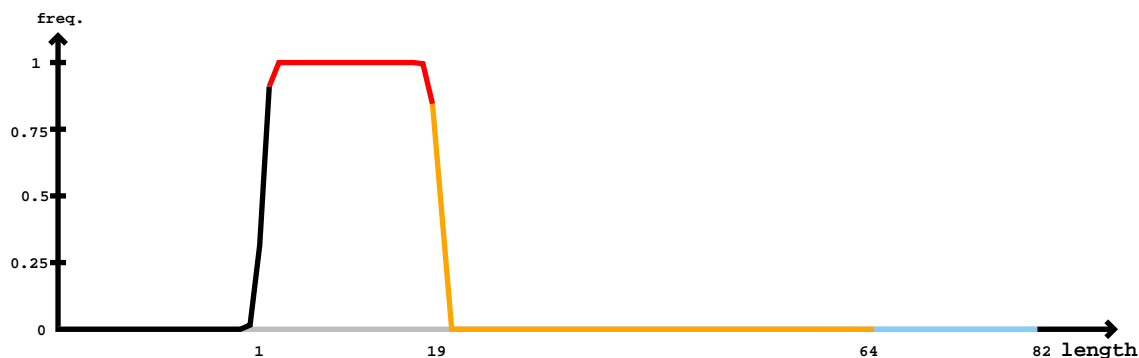

Star

[illegible]



## Mature

## Star

|                                                                                                                |      |   |     |
|----------------------------------------------------------------------------------------------------------------|------|---|-----|
| guuauuguuuccuuacuaguuacaaauuuuucugacuugugauugauaggagaauguuagacuaauagucccuagacaauaccaaaguccgagaccaccuacuuauagag |      |   |     |
| .....uacaauuuuucugacuug.....                                                                                   | 1213 | 0 | seq |
| .....uacaauuuuucugacuui.....                                                                                   | 9    | 1 | seq |
| .....uacaauuuAucugacuug.....                                                                                   | 1    | 1 | seq |
| .....uacaauuuuucugCcuug.....                                                                                   | 1    | 1 | seq |
| .....uacaauuuuucugGcuug.....                                                                                   | 6    | 1 | seq |
| .....uacaauuuuucuaAacuug.....                                                                                  | 2    | 1 | seq |
| .....uacaUuuuucugacuug.....                                                                                    | 1    | 1 | seq |
| .....Aacaauuuuucugacuug.....                                                                                   | 2    | 1 | seq |
| .....uacaauuuuucugacuuiC.....                                                                                  | 6    | 1 | seq |
| .....uacGauuuuucugacuug.....                                                                                   | 2    | 1 | seq |
| .....uacaauuuuucugacuAg.....                                                                                   | 1    | 1 | seq |
| .....uacCauuuuucugacuug.....                                                                                   | 1    | 1 | seq |
| .....uUcaauuuuucugacuug.....                                                                                   | 1    | 1 | seq |
| .....uacaauuuuucugaGuug.....                                                                                   | 1    | 1 | seq |
| .....Nacaauuuuucugacuugug.....                                                                                 | 2    | 1 | seq |
| .....uacaauuuauCugacuugug.....                                                                                 | 1    | 1 | seq |
| .....uacaauuuuucugacuuiAu.....                                                                                 | 1    | 1 | seq |
| .....uacaauuuuucugacuugug.....                                                                                 | 647  | 0 | seq |
| .....uacGauuuuucugacuugug.....                                                                                 | 3    | 1 | seq |
| .....Gacaauuuuucugacuugug.....                                                                                 | 1    | 1 | seq |
| .....uacaauuiuuucugacuugug.....                                                                                | 1    | 1 | seq |
| .....uacaaCuaucugacuugug.....                                                                                  | 2    | 1 | seq |
| .....uacaauuuuucugacuAgu.....                                                                                  | 1    | 1 | seq |
| .....uacaauuuuucugacuugG.....                                                                                  | 38   | 1 | seq |
| .....uacaauuiGuucugacuugug.....                                                                                | 2    | 1 | seq |
| .....uacaauuuuucugacuugA.....                                                                                  | 336  | 1 | seq |
| .....uacaauuuuucugacuuiUu.....                                                                                 | 4    | 1 | seq |
| .....uacaauuuuucugacuuiCu.....                                                                                 | 2    | 1 | seq |
| .....uacaauuuuucCgacuugug.....                                                                                 | 3    | 1 | seq |
| .....uacaauuuuucugacuGgu.....                                                                                  | 2    | 1 | seq |
| .....uacaauuuuucuAacuugug.....                                                                                 | 1    | 1 | seq |
| .....Cacaauuuuucugacuugug.....                                                                                 | 3    | 1 | seq |
| .....uacaauuuuucugGcuugug.....                                                                                 | 2    | 1 | seq |
| .....uacaauuaCucugacuugug.....                                                                                 | 2    | 1 | seq |
| .....uacaauuuuucugacuAugu.....                                                                                 | 2    | 1 | seq |
| .....uacaaAuauucugacuugug.....                                                                                 | 1    | 1 | seq |
| .....uacaauuuuucugacuugC.....                                                                                  | 4272 | 1 | seq |
| .....uacaGuuuuucugacuugug.....                                                                                 | 1    | 1 | seq |
| .....uGcaauuuuucugacuugug.....                                                                                 | 1    | 1 | seq |
| .....uacaauuuuucugacuugCg.....                                                                                 | 17   | 1 | seq |
| .....uacaauuuuucugacuugAg.....                                                                                 | 2    | 1 | seq |
| .....uacaauuuuucugacuugAga.....                                                                                | 1    | 1 | seq |
| .....acaauuuuucugacuCg.....                                                                                    | 18   | 1 | seq |
| .....Ncaauuuuucugacuug.....                                                                                    | 2    | 1 | seq |
| .....acaauuuuucugCcuug.....                                                                                    | 1    | 1 | seq |
| .....acaauuuuucugacuuiC.....                                                                                   | 10   | 1 | seq |
| .....acaauuuuucAgacuug.....                                                                                    | 1    | 1 | seq |
| .....acaGuuuuucugacuug.....                                                                                    | 3    | 1 | seq |
| .....acaUuuuucugacuug.....                                                                                     | 1    | 1 | seq |
| .....accauuuucugacuCuug.....                                                                                   | 8    | 1 | seq |
| .....accauuuucugacuUuug.....                                                                                   | 1    | 1 | seq |
| .....aGauuuuucugacuug.....                                                                                     | 1    | 1 | seq |
| .....accauuGuucugacuug.....                                                                                    | 1    | 1 | seq |
| .....accauuuuUugacuug.....                                                                                     | 2    | 1 | seq |
| .....acUauuuuucugacuug.....                                                                                    | 1    | 1 | seq |
| .....accauCaauucugacuug.....                                                                                   | 2    | 1 | seq |
| .....accauuuucCgacuug.....                                                                                     | 11   | 1 | seq |
| .....accauuuucugacuGug.....                                                                                    | 2    | 1 | seq |
| .....accauuuucugacuAug.....                                                                                    | 1    | 1 | seq |
| .....Ccauuuucugacuug.....                                                                                      | 1    | 1 | seq |
| .....accauuuucugacuGg.....                                                                                     | 5    | 1 | seq |
| .....accauuuucugGcuug.....                                                                                     | 4    | 1 | seq |
| .....acGauuuuucugacuug.....                                                                                    | 7    | 1 | seq |
| .....accauuuucugacuug.....                                                                                     | 1680 | 0 | seq |
| .....Gcauuuucugacuug.....                                                                                      | 7    | 1 | seq |
| .....accauuuucugacuuiA.....                                                                                    | 86   | 1 | seq |
| .....accauuuucCgacuugug.....                                                                                   | 8    | 1 | seq |
| .....acGauuuuucugacuugug.....                                                                                  | 7    | 1 | seq |
| .....accauuuucugacuugG.....                                                                                    | 67   | 1 | seq |
| .....Ncauuuucugacuugug.....                                                                                    | 2    | 1 | seq |

## Mature

## Star

|                                          |                                                                        |       |   |     |
|------------------------------------------|------------------------------------------------------------------------|-------|---|-----|
| guuauuguuuccuuacuagucacaaauuuucugacuuugu | gauugauaggagaauuguuagacuaaagucccuagacaaucacaaaguccgagaccaccuacuuauugag |       |   |     |
| .Gcaauuuuucugacuuugu                     |                                                                        | 10    | 1 | seq |
| .Ucaauuuuucugacuuugu                     |                                                                        | 1     | 1 | seq |
| .Ccaauuuuucugacuuugu                     |                                                                        | 2     | 1 | seq |
| .acaauuuuucugacuuugu                     |                                                                        | 4     | 1 | seq |
| .acaGuuuuucugacuuugu                     |                                                                        | 3     | 1 | seq |
| .acaauCauuucugacuuugu                    |                                                                        | 1     | 1 | seq |
| .acaauuuuucugacCugu                      |                                                                        | 2     | 1 | seq |
| .acaauuuuucugUcuugu                      |                                                                        | 2     | 1 | seq |
| .acaaGuuuuucugacuuugu                    |                                                                        | 1     | 1 | seq |
| .acaUuuuucugacuuugu                      |                                                                        | 1     | 1 | seq |
| .acaauuuuucugacAugu                      |                                                                        | 1     | 1 | seq |
| .acaauuuuucugacuCu                       |                                                                        | 3     | 1 | seq |
| .acaauuuuucugGcuugu                      |                                                                        | 2     | 1 | seq |
| .acaauuuuuAugacuuugu                     |                                                                        | 1     | 1 | seq |
| .acaauuuuucugacuCgu                      |                                                                        | 1     | 1 | seq |
| .acaauuuuucugacuuugC                     |                                                                        | 10047 | 1 | seq |
| .acaauuuuucugacuuugu                     |                                                                        | 1488  | 0 | seq |
| .acaauGuuucugacuuugu                     |                                                                        | 3     | 1 | seq |
| .acUauuuuucugacuuugu                     |                                                                        | 1     | 1 | seq |
| .acaauuuuucugCcuugu                      |                                                                        | 1     | 1 | seq |
| .acaauuaCucugacuuugu                     |                                                                        | 1     | 1 | seq |
| .acaauuuuucugacuAu                       |                                                                        | 2     | 1 | seq |
| .acaauuUuuucugacuuugu                    |                                                                        | 1     | 1 | seq |
| .acaaAuauuucugacuuugu                    |                                                                        | 1     | 1 | seq |
| .acaauuuuucugacuugAg                     |                                                                        | 8     | 1 | seq |
| .acaauuuuucugacuugCg                     |                                                                        | 36    | 1 | seq |
| .acaauuuuucugacuuguA                     |                                                                        | 1     | 1 | seq |
| .acaauuuuucugacuuguU                     |                                                                        | 2     | 1 | seq |
| .acaauuuuucugacuugugU                    |                                                                        | 1     | 1 | seq |
| .caauuuuucugacuuugu                      |                                                                        | 299   | 0 | seq |
| .caauuuuuUugacuuugu                      |                                                                        | 1     | 1 | seq |
| .caauuuuucugUcuugu                       |                                                                        | 1     | 1 | seq |
| .caauuuuucugacuAgu                       |                                                                        | 1     | 1 | seq |
| .caauuuuucugacuAu                        |                                                                        | 1     | 1 | seq |
| .caauGauuucugacuuugu                     |                                                                        | 1     | 1 | seq |
| .caauuaCucugacuuugu                      |                                                                        | 3     | 1 | seq |
| .caaAuauuucugacuuugu                     |                                                                        | 1     | 1 | seq |
| .caauuuuucugacuCu                        |                                                                        | 1     | 1 | seq |
| .caauuuuucugacuugu                       |                                                                        | 2     | 1 | seq |
| .caCuuuuucugacuuugu                      |                                                                        | 1     | 1 | seq |
| .caauuGuuucugacuuugu                     |                                                                        | 1     | 1 | seq |
| .caauuuuucugacuugC                       |                                                                        | 1701  | 1 | seq |
| .caauuuuucugacuugG                       |                                                                        | 15    | 1 | seq |
| .caauuuuucugacuuguA                      |                                                                        | 1     | 1 | seq |
| .caauuuuucugacuugAg                      |                                                                        | 1     | 1 | seq |
| .caauuuuucugacuugCg                      |                                                                        | 4     | 1 | seq |
| .aaauuuuucugacuuguA                      |                                                                        | 1     | 1 | seq |
| .auuuuucugacuuguAa                       |                                                                        | 1     | 1 | seq |
| .auuuuucugacuugAga                       |                                                                        | 1     | 1 | seq |
| .uuagacuauGagucccuagacaa                 |                                                                        | 1     | 1 | seq |
| .ucacaaaguccgagaUcacc                    |                                                                        | 1     | 1 | seq |

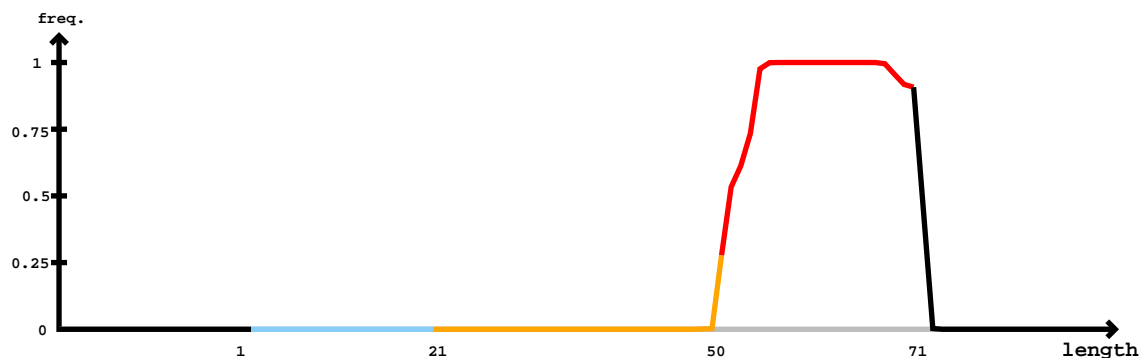

## Mature

[illegible]

## Star

## Mature

acucguaucuuuguccuuaccaugcccugggaaagucuuuaugaagugggaugagugggaaauagagaaggucccaagguucgguuggucacugauguaagcaaggg

|                           |     |   |     |
|---------------------------|-----|---|-----|
| .....aggucccaagguA        | 1   | 1 | seq |
| .....aggucccaagguucggG    | 2   | 1 | seq |
| .....Nggucccaagguucggu    | 1   | 1 | seq |
| .....agguccAcaagguucggu   | 1   | 1 | seq |
| .....aggucccaagguucggu    | 10  | 0 | seq |
| .....aggucccaagguucAguug  | 1   | 1 | seq |
| .....aggucccaagguucgguA   | 18  | 1 | seq |
| .....agguccUaagguucgguug  | 1   | 1 | seq |
| .....aggucccaagguucgguU   | 2   | 1 | seq |
| .....aggucccaagguAucgguug | 1   | 1 | seq |
| .....aggucccaagguucgguCg  | 2   | 1 | seq |
| .....aggucccaagguucgguug  | 2   | 1 | seq |
| .....aggCcccaagguucgguug  | 1   | 1 | seq |
| .....aggucccGagguucgguug  | 1   | 1 | seq |
| .....aggucccaagguucgguug  | 309 | 0 | seq |
| .....aggucccaagguucgguug  | 1   | 1 | seq |
| .....aggucccaagguucgguug  | 1   | 1 | seq |
| .....aggucccaagguucgguug  | 1   | 1 | seq |
| .....aggucccaagguucgguGg  | 2   | 1 | seq |
| .....aggucccaagguucgguug  | 1   | 1 | seq |
| .....aggucccaagguucgguC   | 2   | 1 | seq |
| .....aggucccaagguucgguug  | 3   | 0 | seq |
| .....aggucccaagguucgguugA | 1   | 1 | seq |
| .....aggucccaagguucgguugC | 10  | 1 | seq |
| .....ggucccaagguucggu     | 14  | 0 | seq |
| .....ggucccaagguucgguA    | 4   | 1 | seq |
| .....ggucccaagguucgguC    | 1   | 1 | seq |
| .....ggucccaagguucgguug   | 1   | 1 | seq |
| .....ggucccaagguucgguug   | 105 | 0 | seq |
| .....ggucccaagguucgguGg   | 1   | 1 | seq |
| .....ggucccGagguucgguug   | 1   | 1 | seq |
| .....ggCcccaagguucgguug   | 1   | 1 | seq |
| .....ggucccaagguucgguugC  | 12  | 1 | seq |
| .....ggucccaagguucgguug   | 3   | 0 | seq |
| .....gucccaagguucgguA     | 1   | 1 | seq |
| .....gucccaagguucggu      | 1   | 0 | seq |
| .....Nucccaagguucggu      | 1   | 1 | seq |
| .....gucccaagguucgguug    | 1   | 1 | seq |
| .....gucccaagguucgguug    | 176 | 0 | seq |
| .....gucccaagguucgguCg    | 1   | 1 | seq |
| .....guccUcaagguucgguug   | 1   | 1 | seq |
| .....gucccaagguucgguC     | 2   | 1 | seq |
| .....gucccaagguAucgguug   | 1   | 1 | seq |
| .....gucccGagguucgguug    | 1   | 1 | seq |
| .....gucccaagguucgguA     | 13  | 1 | seq |
| .....gucccaagguucgguGg    | 1   | 1 | seq |
| .....gucccaagguucgguugC   | 12  | 1 | seq |
| .....gucccaagguucgguug    | 4   | 0 | seq |
| .....gucccaagguucgguuAg   | 1   | 1 | seq |
| .....gucccaagguucgguugA   | 1   | 1 | seq |
| .....gucccaagguucgguugC   | 1   | 1 | seq |
| .....ucccaaggCuucgguug    | 1   | 1 | seq |
| .....ucccaagguAucgguug    | 2   | 1 | seq |
| .....ucccaagguucgguGg     | 3   | 1 | seq |
| .....ucccaaAgguucgguug    | 1   | 1 | seq |
| .....ucccaagguucgguAug    | 1   | 1 | seq |
| .....ucccaagguucgguuA     | 15  | 1 | seq |
| .....ucccaagguucgguug     | 362 | 0 | seq |
| .....uccUaagguucgguug     | 1   | 1 | seq |
| .....ucccaagguucgguC      | 1   | 1 | seq |
| .....ucccaagggGucgguug    | 1   | 1 | seq |
| .....ucccaagguucgguug     | 1   | 1 | seq |
| .....ucccaagguucgguCg     | 3   | 1 | seq |
| .....ucccaagguucgguU      | 1   | 1 | seq |
| .....ucccaagguAucgguug    | 2   | 1 | seq |
| .....ucccaagggCucgguug    | 2   | 1 | seq |
| .....ucUcaagguucgguug     | 1   | 1 | seq |
| .....uUcccaagguucgguug    | 1   | 1 | seq |
| .....ucccaagguucgguugC    | 26  | 1 | seq |
| .....ucccaagguucgguug     | 7   | 0 | seq |

Star

## Mature

acucguaucauguccuuaccaugcccugggaaagucuuuaugaagugggaugaguggaaauagagaaaggucccaaggguucgguuggucacugauguaagcaaggg

|                                 |    |   |     |
|---------------------------------|----|---|-----|
| .....ucccaagggguucggguugA.....  | 3  | 1 | seq |
| .....ucccaagggguucggguugCu..... | 2  | 1 | seq |
| .....cccaagggguucggguugC.....   | 38 | 1 | seq |
| .....cccaagggguucggguugA.....   | 2  | 1 | seq |
| .....cccaagggguucggguugg.....   | 2  | 0 | seq |
| .....ccaagggguucggguugCu.....   | 1  | 1 | seq |

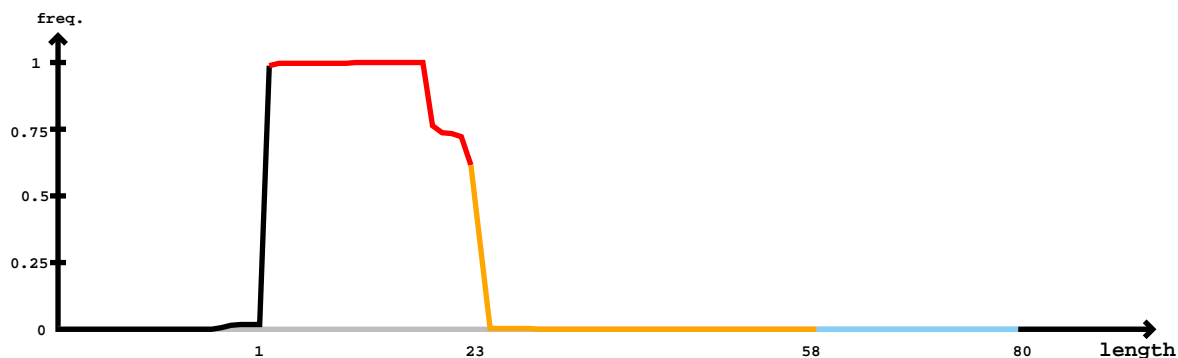

Star

| 5'-                                                                                                             | uggguggaauauauugggugacaacgagagagagcagcgucguggaaaauucaugggacauucauguaacaauauaggcaucagugucucuuugugucacccaaaaauauauuca | -3'   | exp |        |
|-----------------------------------------------------------------------------------------------------------------|---------------------------------------------------------------------------------------------------------------------|-------|-----|--------|
| .....(((((((.....((((((((((((((((((((((((.....(((.....((((.....((((.....)))))).....)))))).....)))))).....)))))) |                                                                                                                     | reads | mm  | sample |
| .....ugggugacaacgagagagagc.....                                                                                 | 2                                                                                                                   | 0     | seq |        |
| .....ugggugacaacgagagagagU.....                                                                                 | 1                                                                                                                   | 1     | seq |        |
| .....ugggugacaacgagagagagc.....                                                                                 | 2                                                                                                                   | 0     | seq |        |
| .....gggugacaacgagagagagcagc.....                                                                               | 1                                                                                                                   | 0     | seq |        |
| .....ugGcaacgagagagagc.....                                                                                     | 1                                                                                                                   | 1     | seq |        |
| .....ugacaaUgagagagagc.....                                                                                     | 1                                                                                                                   | 1     | seq |        |
| .....ugacaacgagagagagc.....                                                                                     | 56                                                                                                                  | 0     | seq |        |
| .....ugacaacgagagagagA.....                                                                                     | 1                                                                                                                   | 1     | seq |        |
| .....ugacaacgagagagagU.....                                                                                     | 6                                                                                                                   | 1     | seq |        |
| .....ugacaaAagagagagagc.....                                                                                    | 10                                                                                                                  | 1     | seq |        |
| .....ugacaacgagagagagca.....                                                                                    | 7                                                                                                                   | 0     | seq |        |
| .....ugacaaAagagagagagca.....                                                                                   | 1                                                                                                                   | 1     | seq |        |
| .....ugacaaAagagagagagcacg.....                                                                                 | 1                                                                                                                   | 1     | seq |        |
| .....ugacaacgagagagagcacg.....                                                                                  | 1                                                                                                                   | 0     | seq |        |
| .....ugacaacgagagagagcacgc.....                                                                                 | 3                                                                                                                   | 0     | seq |        |
| .....ugacaacgagagagagcacgG.....                                                                                 | 1                                                                                                                   | 1     | seq |        |
| .....ugacaaAagagagagagcacgc.....                                                                                | 32                                                                                                                  | 1     | seq |        |
| .....ugacaUcgagagagagcacgc.....                                                                                 | 1                                                                                                                   | 1     | seq |        |
| .....ugacaacgGgagagagcacgc.....                                                                                 | 1                                                                                                                   | 1     | seq |        |
| .....ugacaacgagagagagcacgU.....                                                                                 | 1                                                                                                                   | 1     | seq |        |
| .....ugGcaacgagagagagcacgc.....                                                                                 | 3                                                                                                                   | 1     | seq |        |
| .....Ngacaacgagagagagcacgc.....                                                                                 | 1                                                                                                                   | 1     | seq |        |
| .....ugacaacgagagGgagcacgc.....                                                                                 | 2                                                                                                                   | 1     | seq |        |
| .....ugacaacgagagagagcacgc.....                                                                                 | 180                                                                                                                 | 0     | seq |        |
| .....ugacaacgagagagagcacgcA.....                                                                                | 8                                                                                                                   | 1     | seq |        |
| .....ugacaacgagagagGgcacgc.....                                                                                 | 2                                                                                                                   | 1     | seq |        |
| .....ugacaacgagagagagcacgcG.....                                                                                | 5                                                                                                                   | 1     | seq |        |
| .....ugacUacgagagagagcacgc.....                                                                                 | 1                                                                                                                   | 1     | seq |        |
| .....ugacaacgagagagagcacgcG.....                                                                                | 1                                                                                                                   | 1     | seq |        |
| .....ugacaacgagagagagcacgcU.....                                                                                | 1                                                                                                                   | 1     | seq |        |
| .....gacaacgagagagagca.....                                                                                     | 1                                                                                                                   | 0     | seq |        |
| .....gacaacgagagagagcac.....                                                                                    | 1                                                                                                                   | 0     | seq |        |
| .....gacaacgagagagagcacg.....                                                                                   | 1                                                                                                                   | 0     | seq |        |
| .....gagagagcacgcUgugga.....                                                                                    | 1                                                                                                                   | 1     | seq |        |

**Mature**

**Star**

uugguuggauaaauuugggugacaacgagagagagcacgcucguggaaaaucauggacauucauguacaauuaggcaucaguucucuuguugucacccaaaauauauca

Provisional ID : MA\_10432205\_7464  
 Score total : 0.6  
 Score for star read(s) : -1.3  
 Score for read counts : 0  
 Score for mfe : 0.3  
 Score for randfold : 1.6  
 Score for cons. seed :  
 Total read count : 2371  
 Mature read count : 2369  
 Loop read count : 0  
 Star read count : 2

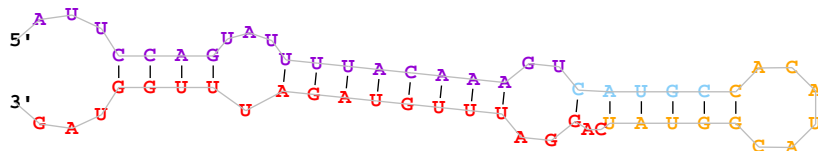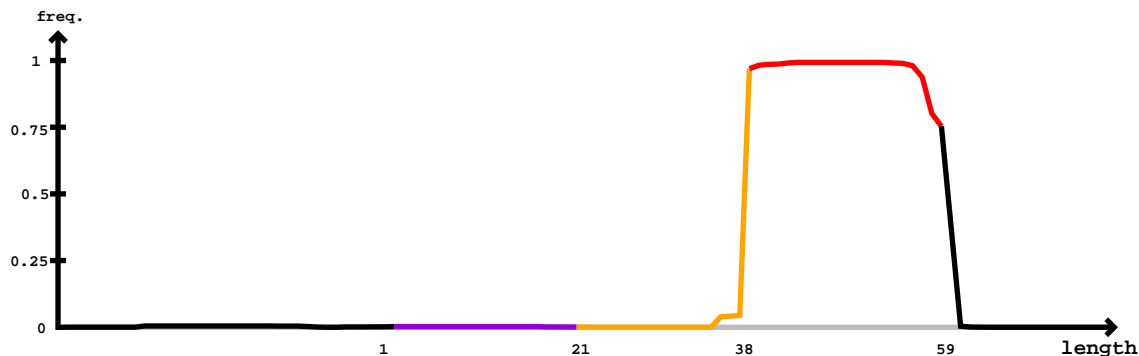

Star

Mature

| 5'                                                                       | obs | exp | reads | mm | sample |
|--------------------------------------------------------------------------|-----|-----|-------|----|--------|
| cucgacuucauagugaagucaaggccaccuuauuuccaguuuuuacaaaguc                     | 1   | 1   | 1     | 1  | seq    |
| cucgacuucauagugaagucaaggccaccuuauuuccaguuuuuacaaaguc                     | 3   | 0   | 3     | 0  | seq    |
| (((((.....))))).)).....((((.....((((.....((((.....))))).)).....))))..... | 1   | 1   | 1     | 1  | seq    |
| cucgacuucauGgugaaguca.....                                               | 1   | 1   | 1     | 1  | seq    |
| .....ucauagugaagucaagg.....                                              | 1   | 1   | 1     | 1  | seq    |
| .....ucauGgugaagucaagg.....                                              | 1   | 1   | 1     | 1  | seq    |
| .....ucauagugaagucaaggU.....                                             | 1   | 1   | 1     | 1  | seq    |
| .....ucauagugaagucaaggG.....                                             | 2   | 0   | 2     | 0  | seq    |
| .....ucauagugaagucaUggg.....                                             | 1   | 1   | 1     | 1  | seq    |
| .....NcauagugaagucaaggG.....                                             | 1   | 1   | 1     | 1  | seq    |
| .....ucauagugaagucaaggG.....                                             | 1   | 0   | 1     | 0  | seq    |
| .....ucauagugaagucaaggG.....                                             | 1   | 1   | 1     | 1  | seq    |
| .....ccauuuuccaguuuuuaca.....                                            | 1   | 1   | 1     | 1  | seq    |
| .....ccauCauuccaguuuuuaca.....                                           | 2   | 1   | 2     | 1  | seq    |
| .....uuauuccaguuuuuacaaaC.....                                           | 1   | 1   | 1     | 1  | seq    |
| .....auuccaguuuuuacaaagu.....                                            | 2   | 1   | 2     | 1  | seq    |
| .....uaCcaggauuuuguagauuu.....                                           | 3   | 1   | 3     | 1  | seq    |
| .....uaCcaggauuuuguagauuu.....                                           | 2   | 1   | 2     | 1  | seq    |
| .....uaCcaggauuuuguagauuuug.....                                         | 6   | 1   | 6     | 1  | seq    |
| .....uaCcaggauuuuguagauuuugg.....                                        | 86  | 1   | 86    | 1  | seq    |
| .....aCcaggauuuuguagauuu.....                                            | 2   | 1   | 2     | 1  | seq    |
| .....aCcaggauuuuguagauuuug.....                                          | 2   | 1   | 2     | 1  | seq    |
| .....aCcaggauuuuguagauuuugg.....                                         | 1   | 1   | 1     | 1  | seq    |
| .....aCcaggauuuuguagauuuuggu.....                                        | 1   | 1   | 1     | 1  | seq    |
| .....Ccaggauuuuguagauuu.....                                             | 1   | 1   | 1     | 1  | seq    |
| .....Ccaggauuuuguagauuuug.....                                           | 1   | 1   | 1     | 1  | seq    |
| .....Ccaggauuuuguagauuuugg.....                                          | 1   | 1   | 1     | 1  | seq    |
| .....ucaggauuuuguagauuuuggGa.....                                        | 2   | 1   | 2     | 1  | seq    |
| .....Ccaggauuuuguagauuuuggua.....                                        | 1   | 1   | 1     | 1  | seq    |
| .....ucaggauuuugAagauuuuggua.....                                        | 1   | 1   | 1     | 1  | seq    |
| .....caggauuuuguagauuuug.....                                            | 13  | 0   | 13    | 0  | seq    |
| .....caggauuuuguagauuuuC.....                                            | 1   | 1   | 1     | 1  | seq    |
| .....caggauuuuguagauuuugg.....                                           | 13  | 0   | 13    | 0  | seq    |
| .....caggauuuuguagauuuugU.....                                           | 1   | 1   | 1     | 1  | seq    |
| .....caggauuuuguagauuuugA.....                                           | 3   | 1   | 3     | 1  | seq    |
| .....caggauuCGuagauuuuggu.....                                           | 1   | 1   | 1     | 1  | seq    |



## Star

## Mature

cucgacuucauagugaagucaagggccaccuuauuccaguuuuuacaaagucaugccacauacgguaucaggauuuguauguuuugguagauuggguuuauaaagguu

|                                   |      |   |     |
|-----------------------------------|------|---|-----|
| .....caggauuuguauguuuuggG.....    | 315  | 1 | seq |
| .....caggauuuguauguuuuggu.....    | 4    | 0 | seq |
| .....caggauuuguauguuuuggA.....    | 13   | 1 | seq |
| .....caggauuuguauguuuuggC.....    | 2    | 1 | seq |
| .....caggauuuguauguuuuggGa.....   | 104  | 1 | seq |
| .....caggauuuguauguuuuggGag.....  | 1813 | 1 | seq |
| .....caggauuugAagauuuugguag.....  | 1    | 1 | seq |
| .....caggauuuguauguuuuggAag.....  | 1    | 1 | seq |
| .....caggauuuguauguuuuggGaga..... | 13   | 1 | seq |
| .....aggauuuguauguuuugg.....      | 1    | 0 | seq |
| .....aggauuuguauguuuUgua.....     | 1    | 1 | seq |
| .....aggauuuguauguuuuggGa.....    | 10   | 1 | seq |
| .....aggauuuguauguuuuggGag.....   | 4    | 1 | seq |
| .....aggauuuguauguuuUguag.....    | 1    | 1 | seq |
| .....aggauuuguauguuuUguaga.....   | 2    | 1 | seq |
| .....aggauuuguauguuuuggGaga.....  | 13   | 1 | seq |
| .....ggauuuguauguuuuggA.....      | 2    | 1 | seq |
| .....ggauuuguauguuuUguag.....     | 1    | 1 | seq |
| .....ggauuuguauguuuUguagau.....   | 3    | 1 | seq |
| .....ggauuuguauguuuuggGagau.....  | 2    | 1 | seq |
| .....gauuuguauguuuuggGag.....     | 3    | 1 | seq |
| .....auuuguauguuuuggGag.....      | 9    | 1 | seq |
| .....auuuguauguuuuggGagau.....    | 1    | 1 | seq |
| .....uuuguauguuuuggGaga.....      | 1    | 1 | seq |
| .....uuuguauguuuuggGagau.....     | 2    | 1 | seq |
| .....uuuguauguuuuggGagaug.....    | 1    | 1 | seq |
| .....uuuguauguuuuggGagaugg.....   | 1    | 1 | seq |

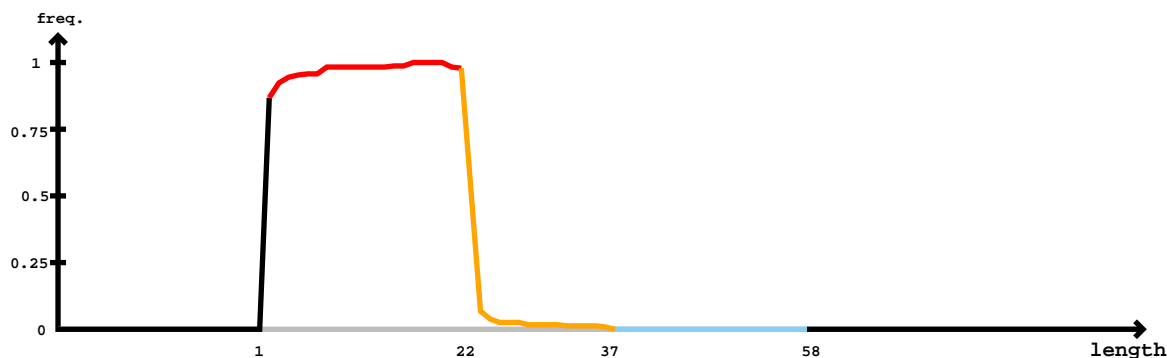

Star

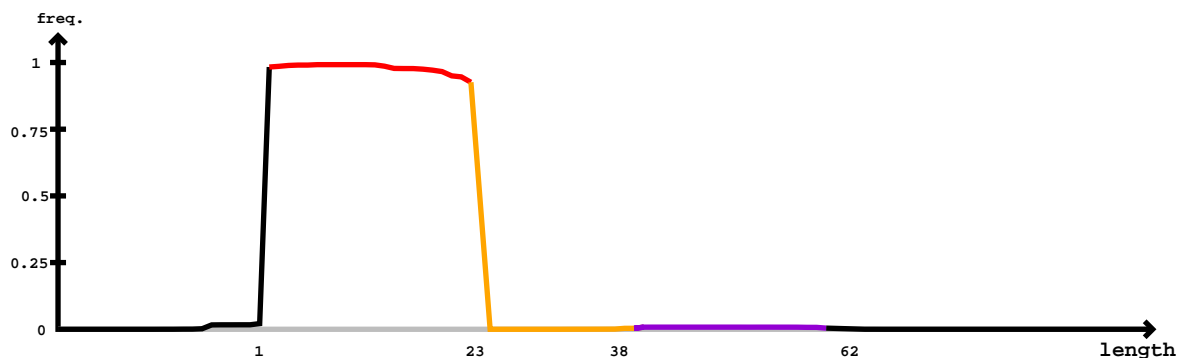

Star

|                                                                                                                               | -3'   | obs |        |
|-------------------------------------------------------------------------------------------------------------------------------|-------|-----|--------|
|                                                                                                                               |       | exp |        |
| gaagaaagcgaagguguuc <u>uca</u> cgcugcgccgcauggguuuuuuacaaa <u>aacc</u> aucugccccagacgagaagagaccuucgccuucguuuacauagauuguguau   |       |     |        |
| gaagaaagcgaagguguuc <u>uca</u> cgcugcgccgcauggguuuuuuuacaaa <u>aacc</u> caucugccccagacgagaagagaccuucgccuucguuuacauagauuguguau |       |     |        |
| ...(((.(((((((((((((((((((((.(((((((.(.((((((((((((((.....)))))))))..)))))).))))))..))))))..))))).))..(((.....)))..)          | reads | mm  | sample |
| .....cgaagguguucuuGacgucugggcc.....                                                                                           | 1     | 1   | seq    |
| .....gaagguguucuuGacgucugggcc.....                                                                                            | 1     | 1   | seq    |
| .....agguguucuuacacgucugggcc.....                                                                                             | 1     | 0   | seq    |
| .....agguguucuuGacgucugggcc.....                                                                                              | 13    | 1   | seq    |
| .....gguguucuuGacgucugggcc.....                                                                                               | 3     | 1   | seq    |
| .....guguucuuGacgucugggcc.....                                                                                                | 2     | 1   | seq    |
| .....guguucuuGacgucugggcc.....                                                                                                | 47    | 1   | seq    |
| .....ugnuucuuGacgucuggg.....                                                                                                  | 28    | 1   | seq    |
| .....ugnuucuuGacgucugggcc.....                                                                                                | 163   | 1   | seq    |
| .....ugnuucuuGacgucugggcc.....                                                                                                | 228   | 1   | seq    |
| .....ugnuucuuGacgucugggccg.....                                                                                               | 17    | 1   | seq    |
| .....ugnuucuuGacgucugggccgc.....                                                                                              | 2     | 1   | seq    |
| .....ugnuucuuGacgucugggccgcg.....                                                                                             | 76    | 1   | seq    |
| .....gnuucuuGacgucugggcc.....                                                                                                 | 10    | 1   | seq    |
| .....gnuucuuGacgucugggcc.....                                                                                                 | 4     | 1   | seq    |
| .....uuucuuGacgucugggcc.....                                                                                                  | 1     | 1   | seq    |
| .....ucuuacacgucugggccAcgaugg.....                                                                                            | 1     | 1   | seq    |
| .....uuacacgucugggccgcg.....                                                                                                  | 1     | 0   | seq    |
| .....uuacacgucugggccAcg.....                                                                                                  | 3     | 1   | seq    |
| .....uuacacgucugggccAcga.....                                                                                                 | 1     | 1   | seq    |
| .....uuacacgucugggccAcgaug.....                                                                                               | 6     | 1   | seq    |
| .....uuacacgucugggccAcgaugg.....                                                                                              | 6     | 1   | seq    |
| .....uuacacgucugggccgcgcauggu.....                                                                                            | 1     | 0   | seq    |
| .....uuacacgucugggccAcgauggu.....                                                                                             | 138   | 1   | seq    |
| .....uuacacgucugggccAcgaugguu.....                                                                                            | 1     | 1   | seq    |
| .....uUacgucugggccgcgca.....                                                                                                  | 2     | 1   | seq    |
| .....uacacgucugggccAcga.....                                                                                                  | 129   | 1   | seq    |
| .....uacacgucugggccAcgau.....                                                                                                 | 188   | 1   | seq    |
| .....uAacgucugggccgcgcau.....                                                                                                 | 2     | 1   | seq    |
| .....uAacgucugggccgcgcaug.....                                                                                                | 3     | 1   | seq    |
| .....uacacgucugggccgcgcaug.....                                                                                               | 4     | 0   | seq    |
| .....uacacgucugggccAcgaug.....                                                                                                | 536   | 1   | seq    |
| .....uUacgucugggccgcgcaug.....                                                                                                | 6     | 1   | seq    |

## Mature

Star

|                                                                                                                   |       |   |     |
|-------------------------------------------------------------------------------------------------------------------|-------|---|-----|
| gaagaaagcgaaagguguuuucacgucugggccgcgcgaugguuuuuuacaaauaaaccaucugccccagacgagaagagccacuuucgccuucguuuacauagauuguguau |       |   |     |
| .....ucacgucugggccAcgaugg.....                                                                                    | 121   | 1 | seq |
| .....uAacgucugggccgcgcgauggu.....                                                                                 | 18    | 1 | seq |
| .....uUacgucugggccgcgcgauggu.....                                                                                 | 22    | 1 | seq |
| .....ucacAucugggccgcgcgauggu.....                                                                                 | 1     | 1 | seq |
| .....ucacgucugggccAcgauggu.....                                                                                   | 514   | 1 | seq |
| .....ucacgucugggccgcgcgaugguu.....                                                                                | 117   | 0 | seq |
| .....ucacgucugggccgcgcgaugguG.....                                                                                | 1     | 1 | seq |
| .....ucacgucugggccgcgcgaugguCu.....                                                                               | 2     | 1 | seq |
| .....ucacgucuggAcgcgcgaugguu.....                                                                                 | 1     | 1 | seq |
| .....ucacgucugggccgcgcgaugguC.....                                                                                | 23    | 1 | seq |
| .....ucacgucugggccUcgaugguu.....                                                                                  | 22    | 1 | seq |
| .....ucacgucugggccCcgaugguu.....                                                                                  | 6     | 1 | seq |
| .....ucacAucugggccgcgcgaugguu.....                                                                                | 6     | 1 | seq |
| .....ucGcgucugggccgcgcgaugguu.....                                                                                | 1     | 1 | seq |
| .....ucacgucugggccgUgaugguu.....                                                                                  | 1     | 1 | seq |
| .....ucacgucugggccAcgaugguu.....                                                                                  | 31318 | 1 | seq |
| .....uUacgucugggccgcgcgaugguu.....                                                                                | 764   | 1 | seq |
| .....uAacgucugggccgcgcgaugguu.....                                                                                | 252   | 1 | seq |
| .....uUacgucugggccgcgcgaugguuu.....                                                                               | 2     | 1 | seq |
| .....ucacgucugggccAcgaugguuu.....                                                                                 | 240   | 1 | seq |
| .....ucacgucugggccgcgcgaugguuC.....                                                                               | 5     | 1 | seq |
| .....uAacgucugggccgcgcgaugguuu.....                                                                               | 3     | 1 | seq |
| .....cacgucugggccAcgau.....                                                                                       | 1     | 1 | seq |
| .....cacgucugggccAcgaug.....                                                                                      | 5     | 1 | seq |
| .....cacgucugggccAcgaugg.....                                                                                     | 6     | 1 | seq |
| .....cacgucugggccAcgauggu.....                                                                                    | 18    | 1 | seq |
| .....cacgucugggccAcgaugguu.....                                                                                   | 22    | 1 | seq |
| .....Uacgucugggccgcgcgaugguu.....                                                                                 | 6     | 1 | seq |
| .....cacgucugggccAcgaugguuu.....                                                                                  | 33    | 1 | seq |
| .....acgucugggccAcgaug.....                                                                                       | 12    | 1 | seq |
| .....acgucugggccAcgaugg.....                                                                                      | 3     | 1 | seq |
| .....acgucugggccAcgauggu.....                                                                                     | 6     | 1 | seq |
| .....acgucugggccAcgaugguu.....                                                                                    | 76    | 1 | seq |
| .....acgucugggccAcgaugguuu.....                                                                                   | 22    | 1 | seq |
| .....cgucugggccgcgcgaugguC.....                                                                                   | 1     | 1 | seq |
| .....cgucugggccAcgaugguu.....                                                                                     | 44    | 1 | seq |
| .....cgucugggccAcgaugguuu.....                                                                                    | 2     | 1 | seq |
| .....ucugggccCcgaugguu.....                                                                                       | 50    | 1 | seq |
| .....ucuggAcgcgcgaugguu.....                                                                                      | 1     | 1 | seq |
| .....ucCgggccgcgcgaugguu.....                                                                                     | 3     | 1 | seq |
| .....ucugggccgcgcgaugguuA.....                                                                                    | 1     | 1 | seq |
| .....ucugggccCcgaugguuu.....                                                                                      | 1     | 1 | seq |
| .....ucugggccCcgaugguuuug.....                                                                                    | 1     | 1 | seq |
| .....uacCaauaaaccaucug.....                                                                                       | 1     | 1 | seq |
| .....aauaaaaccaucugcccU.....                                                                                      | 1     | 1 | seq |
| .....aauaaaaccaucugccccag.....                                                                                    | 1     | 0 | seq |
| .....aauaaaaccaucugccccagacg.....                                                                                 | 1     | 0 | seq |
| .....auaaaccaucugccccagacgaga.....                                                                                | 1     | 0 | seq |
| .....auaaaccaucugccccaUacgaga.....                                                                                | 2     | 1 | seq |
| .....uaaaccaucugccccaUacgaga.....                                                                                 | 1     | 1 | seq |
| .....aaaccaucugccccagacgagaag.....                                                                                | 1     | 0 | seq |
| .....aaccaucugAcccagacga.....                                                                                     | 1     | 1 | seq |
| .....aaccaucugccccagacgaga.....                                                                                   | 1     | 0 | seq |
| .....aaccaucugUcccagacgaga.....                                                                                   | 1     | 1 | seq |
| .....aaccaucugccccaUacgaga.....                                                                                   | 1     | 1 | seq |
| .....aaccaucugAcccagacgagaag.....                                                                                 | 1     | 1 | seq |
| .....accaucugAcccagacg.....                                                                                       | 1     | 1 | seq |
| .....accaucugccccaUacgag.....                                                                                     | 1     | 1 | seq |
| .....accaucugccccaUacgaga.....                                                                                    | 1     | 1 | seq |
| .....accaucugccccaUacgagaa.....                                                                                   | 3     | 1 | seq |
| .....ccaucugccccagacga.....                                                                                       | 1     | 0 | seq |
| .....ccaucugccccagacgag.....                                                                                      | 1     | 0 | seq |
| .....ccaucugccccagacgaA.....                                                                                      | 1     | 1 | seq |
| .....ccaucugccccagacgaga.....                                                                                     | 4     | 0 | seq |
| .....ccaucugccccaUacgaga.....                                                                                     | 3     | 1 | seq |
| .....ccaucugAcccagacgaga.....                                                                                     | 4     | 1 | seq |
| .....ccaucugccccagacgagaa.....                                                                                    | 1     | 0 | seq |
| .....ccaucugccccagacgagaaU.....                                                                                   | 1     | 1 | seq |
| .....ccaucugccccagacgagaaA.....                                                                                   | 1     | 1 | seq |
| .....ccaucugAcccagacgagaag.....                                                                                   | 56    | 1 | seq |

**Mature**

Star

gaagaaagcgaagguguucuacgucugggccgcgaugguuguuuuacaaauaaaccaucugccccagacgagaagagcaccuucgccuucguuuacauagauuguguau

| Sequence                           | Count | Percentage | Category |
|------------------------------------|-------|------------|----------|
| .....ccaucugccccagacgagaaC.....    | 1     | 1          | seq      |
| .....ccaucugccccagacgagaag.....    | 27    | 0          | seq      |
| .....ccaucugUccccagacgagaag.....   | 1     | 1          | seq      |
| .....ccaucugccccagacgagaaga.....   | 1     | 0          | seq      |
| .....ccaucugccccagacgagaagU.....   | 1     | 1          | seq      |
| .....ccaucugccccagacgagaagG.....   | 1     | 1          | seq      |
| .....caucugAcccagacgagaag.....     | 1     | 1          | seq      |
| .....caucugccccagacgagaag.....     | 3     | 0          | seq      |
| .....caucugccccagaUgagaagagc.....  | 1     | 1          | seq      |
| .....aucugccccagacgaga.....        | 1     | 0          | seq      |
| .....aucugccccagacgagaag.....      | 5     | 0          | seq      |
| .....aucugAcccagacgagaag.....      | 2     | 1          | seq      |
| .....aucugccccagacgagaagU.....     | 2     | 1          | seq      |
| .....aucugccccagacgagaaga.....     | 1     | 0          | seq      |
| .....aucugccccagacgagaagag.....    | 1     | 0          | seq      |
| .....aucugccccagacgagaagaC.....    | 1     | 1          | seq      |
| .....aucugccccagacgagaagagU.....   | 20    | 1          | seq      |
| .....aucugccccagacgagaGgagc.....   | 1     | 1          | seq      |
| .....aucugccccagacgagaagagc.....   | 110   | 0          | seq      |
| .....aucugccccagacgagaagagA.....   | 1     | 1          | seq      |
| .....aucugccccagGcgagaagagc.....   | 1     | 1          | seq      |
| .....aucugccccagacgagaagaCc.....   | 1     | 1          | seq      |
| .....aucugccccGgacgagaagagc.....   | 1     | 1          | seq      |
| .....aucugccUcagacgagaagagc.....   | 1     | 1          | seq      |
| .....Gucugccccagacgagaagagc.....   | 1     | 1          | seq      |
| .....ucugccccagacgagaaU.....       | 1     | 1          | seq      |
| .....ucugccccagacgagaagagU.....    | 1     | 1          | seq      |
| .....ucugccccagacgagaagagc.....    | 2     | 0          | seq      |
| .....ucugccccagacgagaagagcacc..... | 2     | 0          | seq      |
| .....cgUgaagagcaccuucgc.....       | 1     | 1          | seq      |



Provisional ID : MA\_10433644\_5533  
Score total : 0.4  
Score for star read(s) : -1.3  
Score for read counts : -0.3  
Score for mfe : 0.5  
Score for randfold : 1.6  
Score for cons. seed :  
Total read count : 11  
Mature read count : 11  
Loop read count : 0  
Star read count : 0

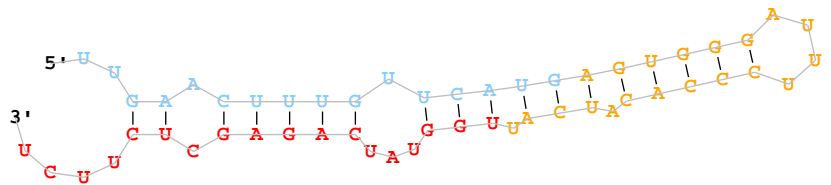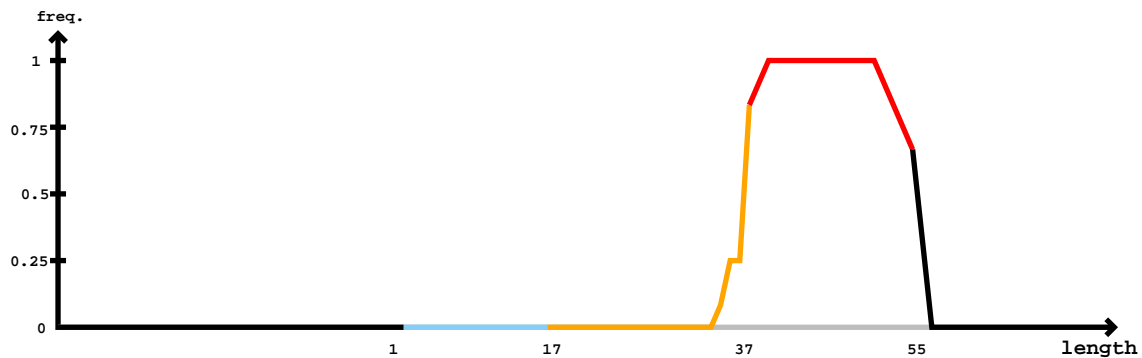

Star

Mature

| 5'                                 |                                                                       | -3'   | exp |        |  |
|------------------------------------|-----------------------------------------------------------------------|-------|-----|--------|--|
| aaaaagcaauuagagauuuuuucacacuuuggag | uugaacuuuguucaugagugggauuuccacauauugguaucagagcucuuuccacucucuuggucaaau |       |     |        |  |
| ...                                | (((((.....(((.....(((.....(((.....)))))))).)))).)).....               | reads | mm  | sample |  |
| .....                              | cauugguaucagagcuU.....                                                | 1     | 1   | seq    |  |
| .....                              | auugguaGcagagcucu.....                                                | 1     | 1   | seq    |  |
| .....                              | Uuugguaucagagcucu.....                                                | 1     | 1   | seq    |  |
| .....                              | ugguaCcagagcucuuc.....                                                | 1     | 1   | seq    |  |
| .....                              | ugguaucagagcucuuc.....                                                | 4     | 0   | seq    |  |
| .....                              | ugguaucagagcucuGcu.....                                               | 1     | 1   | seq    |  |
| .....                              | uUguaucagagcucuuc.....                                                | 1     | 1   | seq    |  |
| .....                              | gguaucagagcucuGcu.....                                                | 1     | 1   | seq    |  |
| .....                              | guaucagagcucuGcu.....                                                 | 1     | 1   | seq    |  |

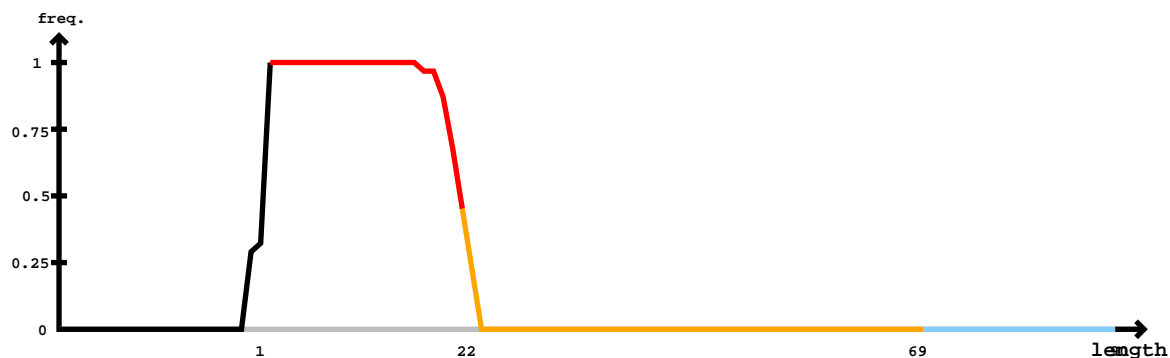

Star

[illegible]





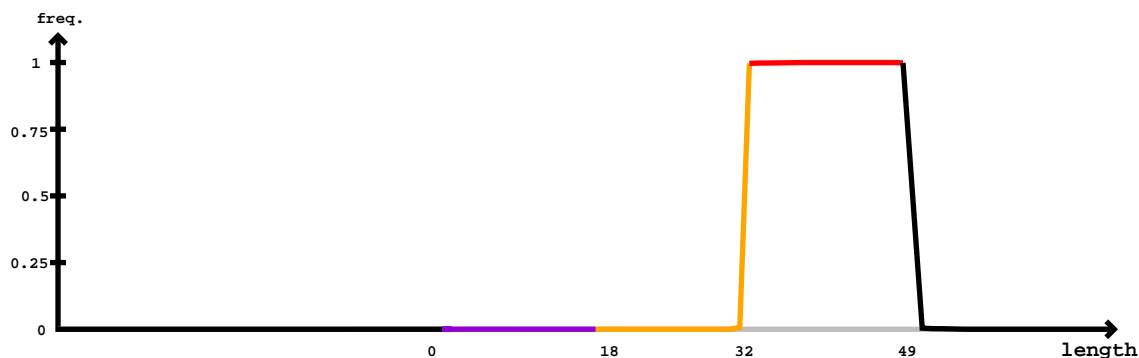

## Mature

|    |                                                                                                                                                               | -3'   | obs |        |
|----|---------------------------------------------------------------------------------------------------------------------------------------------------------------|-------|-----|--------|
|    |                                                                                                                                                               |       | exp |        |
|    |                                                                                                                                                               | reads | mm  | sample |
| 5' | uuuacacaugccuacacacauagugucaauucaccugaucc <u>cauuaga</u> auuuugaaguu <u>aa</u> gcacgcucagac <u>cuag</u> aguguaguc <u>u</u> gggaaggggugacuc <u>u</u> ggggaaguc |       |     |        |
|    | uuuacacaugccuacacacauagugucaauucaccugaucc <u>cauuaga</u> auuuugaaguu <u>aa</u> gcacgcucagac <u>cuag</u> aguguaguc <u>u</u> gggaaggggugacuc <u>u</u> ggggaaguc |       |     |        |
|    | .....((((.....((((.....((((((.....((((((.....((((((.....)).....)))))))))).....)).....)))))))).....                                                            |       |     |        |
|    | .....caccugauccccauCaga.....                                                                                                                                  | 1     | 1   | seq    |
|    | .....cauuagaauuuugUagu.....                                                                                                                                   | 1     | 1   | seq    |
|    | .....gac <u>u</u> agaguguaguc <u>u</u> ggga.....                                                                                                              | 2     | 0   | seq    |
|    | .....N <u>cu</u> agaguguaguc <u>u</u> ggg.....                                                                                                                | 2     | 1   | seq    |
|    | .....ac <u>A</u> agaguguaguc <u>u</u> ggg.....                                                                                                                | 1     | 1   | seq    |
|    | .....ac <u>u</u> agaguguaguc <u>u</u> ggg.....                                                                                                                | 9     | 0   | seq    |
|    | .....acGagaguguaguc <u>u</u> ggga.....                                                                                                                        | 1     | 1   | seq    |
|    | .....ac <u>u</u> agaguguaguc <u>u</u> gggga.....                                                                                                              | 34    | 0   | seq    |
|    | .....ac <u>u</u> agaguguaguc <u>u</u> gggU.....                                                                                                               | 1     | 1   | seq    |
|    | .....N <u>cu</u> agaguguaguc <u>u</u> ggga.....                                                                                                               | 24    | 1   | seq    |
|    | .....ac <u>u</u> agaguguaguc <u>u</u> ggggaC.....                                                                                                             | 3     | 1   | seq    |
|    | .....ac <u>u</u> agaguguaguc <u>u</u> ggggaGg.....                                                                                                            | 1     | 1   | seq    |
|    | .....cuagaguguaguc <u>u</u> ggga.....                                                                                                                         | 11182 | 0   | seq    |
|    | .....cuagaguCguaguc <u>u</u> ggga.....                                                                                                                        | 1     | 1   | seq    |
|    | .....Nuagaguguaguc <u>u</u> ggga.....                                                                                                                         | 17    | 1   | seq    |
|    | .....cuagaguguaguc <u>u</u> gggUa.....                                                                                                                        | 1     | 1   | seq    |
|    | .....cuagaguguaguc <u>u</u> gggga.....                                                                                                                        | 18    | 0   | seq    |
|    | .....cCagaguguaguc <u>u</u> gggga.....                                                                                                                        | 1     | 1   | seq    |
|    | .....cuagaguguaguc <u>u</u> gggG.....                                                                                                                         | 1     | 1   | seq    |
|    | .....cuagGguaguc <u>u</u> gggga.....                                                                                                                          | 4     | 1   | seq    |
|    | .....cuagGguaguc <u>u</u> ggggaag.....                                                                                                                        | 6     | 1   | seq    |
|    | .....cuagaguguaguc <u>u</u> ggggaC.....                                                                                                                       | 1     | 1   | seq    |
|    | .....cuagaguguaguc <u>u</u> ggggaag.....                                                                                                                      | 6     | 0   | seq    |
|    | .....cuagaguguagucugAgaag.....                                                                                                                                | 1     | 1   | seq    |
|    | .....cuagaguguaguc <u>u</u> ggggaA.....                                                                                                                       | 1     | 1   | seq    |
|    | .....cuagaguguaguc <u>u</u> ggggaCG.....                                                                                                                      | 1     | 1   | seq    |
|    | .....cuagaguguaguc <u>u</u> ggggaagg.....                                                                                                                     | 2     | 0   | seq    |
|    | .....cuagaguguaguc <u>u</u> gggaaggg.....                                                                                                                     | 3     | 0   | seq    |
|    | .....cuagaguguaguc <u>u</u> gggaaggC.....                                                                                                                     | 1     | 1   | seq    |
|    | .....uagGguaguc <u>u</u> gggga.....                                                                                                                           | 2     | 1   | seq    |
|    | .....uagaguguaguc <u>u</u> gggga.....                                                                                                                         | 5     | 0   | seq    |
|    | .....Cagaguguaguc <u>u</u> ggggaag.....                                                                                                                       | 1     | 1   | seq    |
|    | .....uagaguguaguc <u>u</u> ggggaag.....                                                                                                                       | 3     | 0   | seq    |

## Star

## Mature

|                                                                                                                             |   |   |     |
|-----------------------------------------------------------------------------------------------------------------------------|---|---|-----|
| uuuguacaugccuacaacauagugucaauuaccugaucc <u>cauuagaauuuugaagu</u> <u>uaagcacgcucagacu</u> agaguaguacugggaagggugacuacugggaguc |   |   |     |
| .....uagaguaguacugggaagggug.....                                                                                            | 1 | 0 | seq |
| .....agaguaguacugggaag.....                                                                                                 | 1 | 0 | seq |
| .....agGguaguacugggaag.....                                                                                                 | 1 | 1 | seq |
| .....agaguaguacugggaaA.....                                                                                                 | 1 | 1 | seq |
| .....agaguaguacugggaaggCu.....                                                                                              | 1 | 1 | seq |
| .....gaguaguacugggaagA.....                                                                                                 | 1 | 1 | seq |
| .....gaguaguacugggaaggg.....                                                                                                | 2 | 0 | seq |
| .....gaguaguacugggaagggA.....                                                                                               | 1 | 1 | seq |
| .....gaguaguacugggaagggug.....                                                                                              | 1 | 0 | seq |
| .....aguaguacugggaaggg.....                                                                                                 | 2 | 0 | seq |
| .....aguaguacugggaaggggu.....                                                                                               | 2 | 0 | seq |
| .....aguaguacugggaagggC.....                                                                                                | 1 | 1 | seq |
| .....guaguacugggaaggggu.....                                                                                                | 3 | 0 | seq |
| .....guaguacugggaagggC.....                                                                                                 | 2 | 1 | seq |
| .....guaguacugggaagggGg.....                                                                                                | 1 | 1 | seq |
| .....guaguacugggaagggug.....                                                                                                | 1 | 0 | seq |
| .....uaguacugggaagggguU.....                                                                                                | 1 | 1 | seq |

[illegible]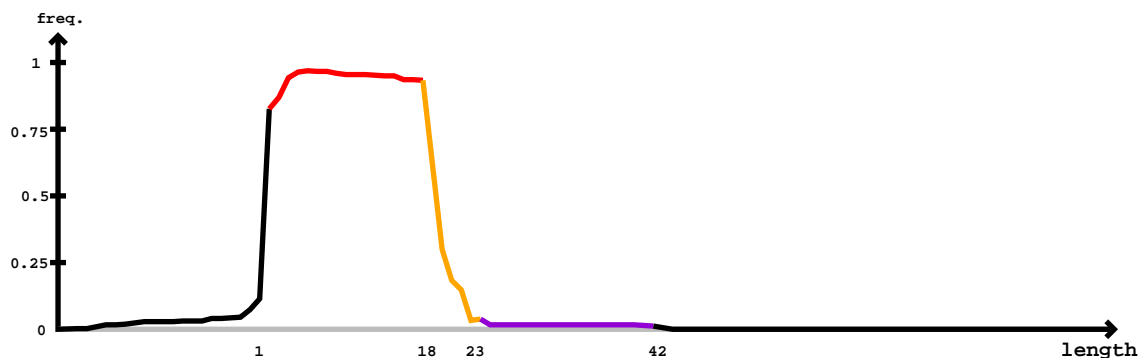[illegible]

# Mature Star

|                                                                                     |    |   |     |
|-------------------------------------------------------------------------------------|----|---|-----|
| ugaugaaaauuguaaacaauaacaccaucuuucgggaucuuagugguccaagggccgugcugauaguuuugcacuucugaggc | 4  | 1 | seq |
| .....caccacuuucgggaucA.....                                                         | 1  | 1 | seq |
| .....caccacuuucgggaCcu.....                                                         | 1  | 1 | seq |
| .....caccacuuucgggaucuu.....                                                        | 47 | 0 | seq |
| .....caccacuuucgggaucAu.....                                                        | 1  | 1 | seq |
| .....caccacuuucgggaAcuu.....                                                        | 14 | 1 | seq |
| .....caccacuuucgggaucC.....                                                         | 4  | 1 | seq |
| .....caccacuuucgggaucA.....                                                         | 1  | 1 | seq |
| .....caccacuuucgggaucuu.....                                                        | 1  | 1 | seq |
| .....caccacuuucgggaAcuua.....                                                       | 5  | 1 | seq |
| .....caccacuuucgggaucuu.....                                                        | 21 | 0 | seq |
| .....caccacuuucgggaGcuua.....                                                       | 1  | 1 | seq |
| .....caccacuuucgggaucuuA.....                                                       | 6  | 1 | seq |
| .....caccacuuucgggaucuuC.....                                                       | 1  | 1 | seq |
| .....caccacuuucgggaucuuag.....                                                      | 1  | 0 | seq |
| .....caccacuuucgggaucuuA.....                                                       | 16 | 1 | seq |
| .....caccacuuucgggaucuuA.....                                                       | 2  | 1 | seq |
| .....caccacuuucgggaucuuA.....                                                       | 5  | 1 | seq |
| .....accaucuuucgggaAcuu.....                                                        | 7  | 1 | seq |
| .....accaucuuucgggaucuu.....                                                        | 5  | 0 | seq |
| .....accaucuuucgggaucuuC.....                                                       | 1  | 1 | seq |
| .....accaucuuucgggaucuu.....                                                        | 1  | 1 | seq |
| .....accaucuuucgggaAcuua.....                                                       | 2  | 1 | seq |
| .....accaucuuucgggaucuuA.....                                                       | 2  | 1 | seq |
| .....accaucuuucgggaucuuA.....                                                       | 1  | 1 | seq |
| .....ccaucuuucgggaucuu.....                                                         | 11 | 0 | seq |
| .....ccaucuuucgggaAcuua.....                                                        | 2  | 1 | seq |
| .....ccaucuuucgggaucuuA.....                                                        | 3  | 1 | seq |
| .....ccaucuuucgggaucuuA.....                                                        | 13 | 1 | seq |
| .....ccaucuuucgggaucuuA.....                                                        | 2  | 1 | seq |
| .....ccaucuuucgggaucuuA.....                                                        | 1  | 1 | seq |
| .....caucuuucgggaucuuC.....                                                         | 1  | 1 | seq |
| .....caucuuucgggaucuuA.....                                                         | 2  | 1 | seq |
| .....caucuuucgggaucuuA.....                                                         | 6  | 1 | seq |
| .....aucuuucgggaucuuA.....                                                          | 3  | 1 | seq |
| .....aucuuucgggaucuuA.....                                                          | 2  | 1 | seq |
| .....gCccaagggccgugcug.....                                                         | 1  | 1 | seq |
| .....gCccaagggccgugcuga.....                                                        | 1  | 1 | seq |
| .....gCccaagggccgugcugau.....                                                       | 4  | 1 | seq |
| .....ccaagggccgugcugauC.....                                                        | 1  | 1 | seq |

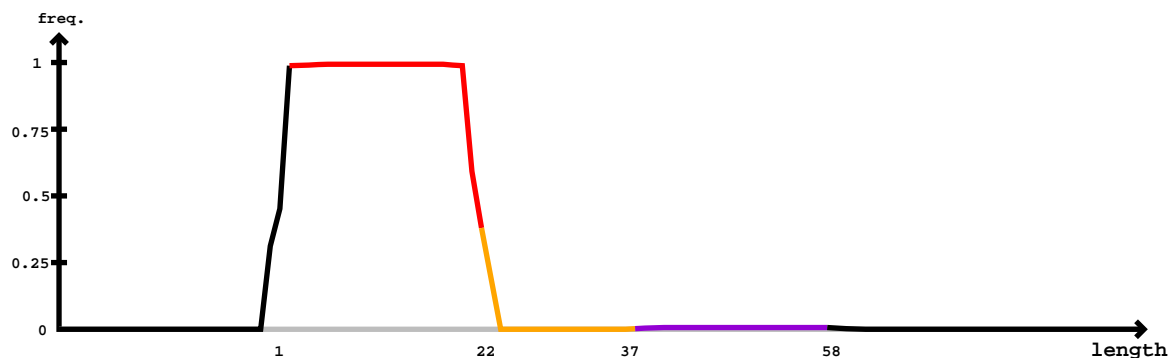

Star

| 5'-                              | ucagccugaaaccgucgcaaaauucuaauggccauaaucccguccucuccaaugaaaauacaggccuaugucuaagaaauuuugucguuucccuucaagugcauggguaac  | -3' | obs    |
|----------------------------------|------------------------------------------------------------------------------------------------------------------|-----|--------|
|                                  | uccagccugaaaccgucgcaaaauucuaauggccauaaucccguccucuccaaugaaaauacaggccuaugucuaagaaauuuugucguuucccuucaagugcauggguaac |     | exp    |
| .....(((((((.....)))))))).....   | reads                                                                                                            | mm  | sample |
| .....auucuaauggccGuauccc.....    | 1                                                                                                                | 1   | seq    |
| .....auucuaauggccGuaucccug.....  | 283                                                                                                              | 1   | seq    |
| .....auucuaauggccauaaucccg.....  | 4                                                                                                                | 0   | seq    |
| .....auCcuuauggcccauaaucccg..... | 1                                                                                                                | 1   | seq    |
| .....uucuaauggccGuaucccug.....   | 3                                                                                                                | 1   | seq    |
| .....uucuaauggcccauaaucccg.....  | 1                                                                                                                | 0   | seq    |
| .....uucuaauggccGuaucccug.....   | 125                                                                                                              | 1   | seq    |
| .....uGcuuauggcccauaaucccg.....  | 1                                                                                                                | 1   | seq    |
| .....ucuaauggccGuauccc.....      | 2                                                                                                                | 1   | seq    |
| .....ucuaauggccGuaucccu.....     | 2                                                                                                                | 1   | seq    |
| .....ucuaauggccGuaucccug.....    | 76                                                                                                               | 1   | seq    |
| .....ucuaauggccGuaucccug.....    | 70                                                                                                               | 1   | seq    |
| .....ucuaauggccGuaucccuguc.....  | 347                                                                                                              | 1   | seq    |
| .....cuuauggccGuaucccuguc.....   | 1                                                                                                                | 1   | seq    |
| .....uaauggccGuaucccuguc.....    | 1                                                                                                                | 1   | seq    |
| .....uauggccGuaucccuguc.....     | 2                                                                                                                | 1   | seq    |
| .....auggccGuaucccuguc.....      | 1                                                                                                                | 1   | seq    |
| .....acaggccuaugucuaagaaCau..... | 2                                                                                                                | 1   | seq    |
| .....caggcGaugucuaagaaauu.....   | 2                                                                                                                | 1   | seq    |
| .....aggcGaugucuaagaaauuu.....   | 1                                                                                                                | 1   | seq    |
| .....ggcGaugucuaagaaauuug.....   | 1                                                                                                                | 1   | seq    |

Provisional ID : MA\_10435792\_7354  
 Score total : 6590.9  
 Score for star read(s) : 3.9  
 Score for read counts : 6583  
 Score for mfe : 2.4  
 Score for randfold : 1.6  
 Score for cons. seed :  
 Total read count : 12924  
 Mature read count : 12349  
 Loop read count : 0  
 Star read count : 575

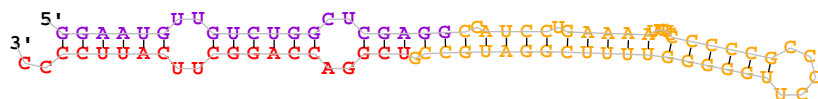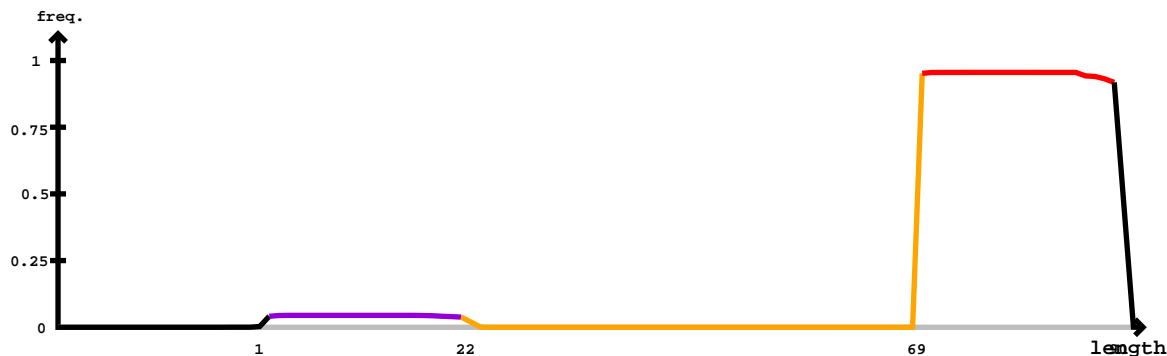

### Star

### Mature

|      |                                                                                      |                     |                   |             |                 |                          |       |     |        |
|------|--------------------------------------------------------------------------------------|---------------------|-------------------|-------------|-----------------|--------------------------|-------|-----|--------|
| 5' - | aaggagaaauggguuugagg                                                                 | ggaugugucuggcucgagg | ccauccugaaaauaguc | cccccgccccu | ggggguuuucggaug | ccgucggaccaggcucauucccuc | -3'   | obs |        |
|      | aaggagaaauggguuugagg                                                                 | ggaugugucuggcucgagg | ccauccugaaaauaguc | cccccgccccu | ggggguuuucggaug | ccgucggaccaggcucauucccuc |       | exp |        |
|      | (((((((((((((.....((((((((.....((((((((.....)))))))))))))))))))))))))))))))))))))))) |                     |                   |             |                 |                          | reads | mm  | sample |
|      | .gaggggaauugucuggcuU.....                                                            |                     |                   |             |                 |                          | 1     | 1   | seq    |
|      | .gaggggaauugucuggcuc.....                                                            |                     |                   |             |                 |                          | 1     | 0   | seq    |
|      | .ggggaauugucuggcuc.....                                                              |                     |                   |             |                 |                          | 1     | 0   | seq    |
|      | .ggggaauugucuggcC.....                                                               |                     |                   |             |                 |                          | 4     | 1   | seq    |
|      | .ggggaauugucuggcuc.....                                                              |                     |                   |             |                 |                          | 1     | 0   | seq    |
|      | .ggggaauugucuggcG.....                                                               |                     |                   |             |                 |                          | 1     | 1   | seq    |
|      | .ggggaauugucuggcuc.....                                                              |                     |                   |             |                 |                          | 7     | 0   | seq    |
|      | .ggggaauugucuggcucU.....                                                             |                     |                   |             |                 |                          | 1     | 1   | seq    |
|      | .ggggaauugucuggcucg.....                                                             |                     |                   |             |                 |                          | 7     | 0   | seq    |
|      | .ggggaauugucuggcucga.....                                                            |                     |                   |             |                 |                          | 1     | 0   | seq    |
|      | .ggggaauugucuggcucgag.....                                                           |                     |                   |             |                 |                          | 6     | 0   | seq    |
|      | .ggggaauugucuggcucgaU.....                                                           |                     |                   |             |                 |                          | 3     | 1   | seq    |
|      | .ggggaauugucuggcucgagg.....                                                          |                     |                   |             |                 |                          | 1     | 0   | seq    |
|      | .ggggaauugucuggcucgaCg.....                                                          |                     |                   |             |                 |                          | 1     | 1   | seq    |
|      | .ggaauugucuggcuc.....                                                                |                     |                   |             |                 |                          | 2     | 0   | seq    |
|      | .ggaauugucuggcucg.....                                                               |                     |                   |             |                 |                          | 17    | 0   | seq    |
|      | .ggaauugucuggcucA.....                                                               |                     |                   |             |                 |                          | 1     | 1   | seq    |
|      | .ggaauugucuggcucga.....                                                              |                     |                   |             |                 |                          | 14    | 0   | seq    |
|      | .ggaauugucuggcucgG.....                                                              |                     |                   |             |                 |                          | 1     | 1   | seq    |
|      | .ggaauugucuggcucgag.....                                                             |                     |                   |             |                 |                          | 14    | 0   | seq    |
|      | .Ugaauugucuggcucgag.....                                                             |                     |                   |             |                 |                          | 1     | 1   | seq    |
|      | .ggaauugucuggcucgagC.....                                                            |                     |                   |             |                 |                          | 1     | 1   | seq    |
|      | .ggaauugucuggcucgagg.....                                                            |                     |                   |             |                 |                          | 1     | 1   | seq    |
|      | .ggaauugucuggcucgagg.....                                                            |                     |                   |             |                 |                          | 4     | 1   | seq    |
|      | .ggaauugucuggcucgagg.....                                                            |                     |                   |             |                 |                          | 379   | 0   | seq    |
|      | .Cgaauugucuggcucgagg.....                                                            |                     |                   |             |                 |                          | 1     | 1   | seq    |
|      | .ggaauugucuggcucgagg.....                                                            |                     |                   |             |                 |                          | 1     | 1   | seq    |
|      | .ggaauugCcgucgucgagg.....                                                            |                     |                   |             |                 |                          | 1     | 1   | seq    |
|      | .ggaauugucuggcucgaAg.....                                                            |                     |                   |             |                 |                          | 2     | 1   | seq    |
|      | .ggaauugucuggcucgagU.....                                                            |                     |                   |             |                 |                          | 5     | 1   | seq    |
|      | .ggaauugucuggcucgGgg.....                                                            |                     |                   |             |                 |                          | 1     | 1   | seq    |
|      | .ggaauugucCggcucgagg.....                                                            |                     |                   |             |                 |                          | 1     | 1   | seq    |
|      | .ggaauugucuggcucUgaagg.....                                                          |                     |                   |             |                 |                          | 1     | 1   | seq    |

## Star

## Mature

|                                                                                                                   |     |   |     |
|-------------------------------------------------------------------------------------------------------------------|-----|---|-----|
| aaggagaaauggguugaggggaauugucuggcucgagggccaucucgaaaaauagucggcccccgccccuugggggguuuucgggaugccgucggaccaggcucauuccccuc |     |   |     |
| .....ggaauugucuggcucgaCg.....                                                                                     | 16  | 1 | seq |
| .....ggaauugucuggcucgagA.....                                                                                     | 27  | 1 | seq |
| .....ggGauguugucuggcucgaggg.....                                                                                  | 1   | 1 | seq |
| .....ggaauugucuggcucgagggc.....                                                                                   | 3   | 0 | seq |
| .....gaaugucuggcucgaA.....                                                                                        | 1   | 1 | seq |
| .....gaaugucuggcucgag.....                                                                                        | 1   | 0 | seq |
| .....gaaCguugucuggcucgaggg.....                                                                                   | 1   | 1 | seq |
| .....gaaugucuggcucgaggg.....                                                                                      | 15  | 0 | seq |
| .....gaaugucuggcucgagggG.....                                                                                     | 2   | 1 | seq |
| .....gaaugCugucuggcucgagggc.....                                                                                  | 1   | 1 | seq |
| .....gaaugucuggcucgagggc.....                                                                                     | 11  | 0 | seq |
| .....gaaugucuggcucgagggA.....                                                                                     | 2   | 1 | seq |
| .....gaaugucuggcucgagggcc.....                                                                                    | 4   | 0 | seq |
| .....gaaugucuggcucgagggcU.....                                                                                    | 1   | 1 | seq |
| .....aaugucuggcucgagggcc.....                                                                                     | 3   | 0 | seq |
| .....aaugucuggcucgagggcU.....                                                                                     | 3   | 1 | seq |
| .....guugucuggcucgagggc.....                                                                                      | 1   | 0 | seq |
| .....ggUugccgucggaccaggcu.....                                                                                    | 1   | 1 | seq |
| .....gucggaccaggcucauuccA.....                                                                                    | 2   | 1 | seq |
| .....gucggaccaggcucauuccc.....                                                                                    | 2   | 0 | seq |
| .....Cucggaccaggcucauucccc.....                                                                                   | 1   | 1 | seq |
| .....ucggaccaggcucauC.....                                                                                        | 15  | 1 | seq |
| .....ucggaccaggcucauu.....                                                                                        | 146 | 0 | seq |
| .....ucggacUaggcucauu.....                                                                                        | 1   | 1 | seq |
| .....ucggGccaggcucauu.....                                                                                        | 1   | 1 | seq |
| .....ucggaccaggcuucGuu.....                                                                                       | 2   | 1 | seq |
| .....ucggaccaggcucauA.....                                                                                        | 1   | 1 | seq |
| .....ucggaccaggcucaCu.....                                                                                        | 1   | 1 | seq |
| .....ucggaccaggcucauuA.....                                                                                       | 1   | 1 | seq |
| .....ucggaccaggcucauuc.....                                                                                       | 21  | 0 | seq |
| .....ucggaccaggcucauuU.....                                                                                       | 4   | 1 | seq |
| .....ucggaccaggcucauucA.....                                                                                      | 4   | 1 | seq |
| .....ucggaccaggcucauucU.....                                                                                      | 10  | 1 | seq |
| .....ucggaccaggcucauucc.....                                                                                      | 88  | 0 | seq |
| .....ucAgaccaggcucauucc.....                                                                                      | 1   | 1 | seq |
| .....ucggaccaggcuCcauucc.....                                                                                     | 1   | 1 | seq |
| .....ggUucggacUaggcucauucc.....                                                                                   | 1   | 1 | seq |
| .....ucggaUcaggcucauucc.....                                                                                      | 1   | 1 | seq |
| .....ucggaccaggcucauuUc.....                                                                                      | 1   | 1 | seq |
| .....ucggaccaggcucaCucc.....                                                                                      | 1   | 1 | seq |
| .....ucggaccaggcucauuCG.....                                                                                      | 1   | 1 | seq |
| .....ucggaccGggcucauuccc.....                                                                                     | 1   | 1 | seq |
| .....ucggaccaggcucauucAc.....                                                                                     | 1   | 1 | seq |
| .....ucgUaccaggcucauuccc.....                                                                                     | 1   | 1 | seq |
| .....ucggaccaggcuCcauuccc.....                                                                                    | 1   | 1 | seq |
| .....ucggaAcaggcucauuccc.....                                                                                     | 1   | 1 | seq |
| .....uUggaccaggcucauuccc.....                                                                                     | 1   | 1 | seq |
| .....ucggacAaggcucauuccc.....                                                                                     | 1   | 1 | seq |
| .....ucCgaccaggcucauuccc.....                                                                                     | 1   | 1 | seq |
| .....ucggaccaggcucauuccA.....                                                                                     | 4   | 1 | seq |
| .....Ncggaccaggcucauuccc.....                                                                                     | 1   | 1 | seq |
| .....ucggaccaggcucauCccc.....                                                                                     | 1   | 1 | seq |
| .....ucggaccaggcucaGuccc.....                                                                                     | 1   | 1 | seq |
| .....ucggaccaggcucauuccc.....                                                                                     | 147 | 0 | seq |
| .....ucggaUcaggcucauuccc.....                                                                                     | 1   | 1 | seq |
| .....ucggaccaggcucauuccNc.....                                                                                    | 1   | 1 | seq |
| .....ucggaccaggcuAcauuccc.....                                                                                    | 10  | 1 | seq |
| .....ucggaccaggcucauAcccc.....                                                                                    | 3   | 1 | seq |
| .....uUggaccaggcucauuccc.....                                                                                     | 7   | 1 | seq |
| .....ucCgaccaggcucauuccc.....                                                                                     | 1   | 1 | seq |
| .....ucggaccaAgcucauuccc.....                                                                                     | 7   | 1 | seq |
| .....ucggacUaggcucauuccc.....                                                                                     | 10  | 1 | seq |
| .....ucggaccaggcucauuAccc.....                                                                                    | 2   | 1 | seq |
| .....ucggaccaggcuuUauucccc.....                                                                                   | 9   | 1 | seq |
| .....ucUgaccaggcucauucccc.....                                                                                    | 2   | 1 | seq |
| .....ucggaccaggcCcauucccc.....                                                                                    | 25  | 1 | seq |
| .....ucggaccaggcucauuUccc.....                                                                                    | 5   | 1 | seq |
| .....ucggaccaggcucaCucccc.....                                                                                    | 9   | 1 | seq |
| .....ucggaccaggcucauucccA.....                                                                                    | 323 | 1 | seq |
| .....ucggaccaggcuucGuucccc.....                                                                                   | 34  | 1 | seq |



## Star

## Mature

aaggagaaauggguuugaggggaauugucuggcucgagggccaucucgaaaaauaguccccccgccccuuggggguuuuucgggaugccgucggaccaggguucauuccccuc

|                                |      |   |     |
|--------------------------------|------|---|-----|
| .....ucggaccaggGuucauucccc..   | 4    | 1 | seq |
| .....ucggaccaggAuucauucccc..   | 4    | 1 | seq |
| .....ucggaccCggcuucauucccc..   | 2    | 1 | seq |
| .....ucggaccaggguucauuccGcc..  | 1    | 1 | seq |
| .....ucggaccaggguucCuucccc..   | 4    | 1 | seq |
| .....ucggaccagggcAucauucccc..  | 3    | 1 | seq |
| .....Ncggaccaggguucauucccc..   | 7    | 1 | seq |
| .....ucggaccaggguCcauucccc..   | 34   | 1 | seq |
| .....ucggaccaggguucauucccc..   | 8863 | 0 | seq |
| .....ucggaccaggguucauuccU..    | 1444 | 1 | seq |
| .....ucggaccaggguUuucccc..     | 1    | 1 | seq |
| .....ucggaccaggCcuucauucccc..  | 1    | 1 | seq |
| .....ucggaccaggguucaGucccc..   | 3    | 1 | seq |
| .....ucggGccaggguucauucccc..   | 33   | 1 | seq |
| .....ucggaccaggguucauuccAc..   | 7    | 1 | seq |
| .....ucggaccaggguGcauucccc..   | 1    | 1 | seq |
| .....ucggaccaggguuAuucccc..    | 1    | 1 | seq |
| .....ucggaccaggAcucauucccc..   | 3    | 1 | seq |
| .....ucggaccaCgcucauucccc..    | 1    | 1 | seq |
| .....ucggagcaggguucauucccc..   | 1    | 1 | seq |
| .....ucggaccaggguucauuccUcc..  | 11   | 1 | seq |
| .....ucggUccaggguucauucccc..   | 2    | 1 | seq |
| .....Gcggaccaggguucauucccc..   | 12   | 1 | seq |
| .....ucAgaccaggguucauucccc..   | 9    | 1 | seq |
| .....ucggaccaggguucauuccG..    | 47   | 1 | seq |
| .....ucggaccaggguucauGcccc..   | 1    | 1 | seq |
| .....ucggaccGggguucauucccc..   | 20   | 1 | seq |
| .....ucgggaAaggguucauucccc..   | 4    | 1 | seq |
| .....ucggaccaggUucauucccc..    | 5    | 1 | seq |
| .....Acggaccaggguucauucccc..   | 7    | 1 | seq |
| .....ucggaccaggguucauuccAcc..  | 10   | 1 | seq |
| .....ucggaccaggguucauuccCccc.. | 40   | 1 | seq |
| .....uAggaccaggguucauucccc..   | 1    | 1 | seq |
| .....ucggaccaggUcuucauucccc..  | 1    | 1 | seq |
| .....ucggaccaUgcucauucccc..    | 3    | 1 | seq |
| .....ucgUaccaggguucauucccc..   | 2    | 1 | seq |
| .....ucggaccaggguucauuccGccc.. | 1    | 1 | seq |
| .....ucggaccUggguucauucccc..   | 5    | 1 | seq |
| .....ucgggaUcaggguucauucccc..  | 4    | 1 | seq |
| .....ucgAaccaggguucauucccc..   | 5    | 1 | seq |
| .....ucggaccaggguucauucccccG.. | 21   | 1 | seq |
| .....ucgAaccaggguucauuccccu..  | 1    | 1 | seq |
| .....ucggaccaggguucauucccccA.. | 301  | 1 | seq |
| .....ucggaccagggcCucauuccccu.. | 2    | 1 | seq |
| .....ucggaccaggguucauuccGccu.. | 1    | 1 | seq |
| .....ucggaccaggguucauuccccu..  | 430  | 0 | seq |
| .....ucggUccaggguucauuccccu..  | 1    | 1 | seq |
| .....ucggaccaggGuucauuccccu..  | 1    | 1 | seq |
| .....ucAgaccaggguucauuccccu..  | 2    | 1 | seq |
| .....ucggaccaggguucGuuccccu..  | 7    | 1 | seq |
| .....ucggaccaggguuUauuccccu..  | 1    | 1 | seq |
| .....ucggaccaggguucaCuucccu..  | 1    | 1 | seq |
| .....Ncggaccaggguucauuccccu..  | 2    | 1 | seq |
| .....Acggaccaggguucauuccccu..  | 1    | 1 | seq |
| .....ucggaccaggguucauuccccUu.. | 1    | 1 | seq |
| .....ucggaccaggguucauucccccA.. | 2    | 1 | seq |
| .....ucggaccaggguucauuccccuG.. | 4    | 1 | seq |
| .....ucggaccaggguucauuccccuc.. | 1    | 0 | seq |
| .....cggaccaggguuUauuc....     | 1    | 1 | seq |
| .....cggaccaggguucauucc....    | 6    | 0 | seq |
| .....Uggaccaggguucauucc....    | 1    | 1 | seq |
| .....cggaccaggguucauucccc..    | 4    | 0 | seq |
| .....cggaccaggguucauuccccc..   | 8    | 0 | seq |
| .....cggaccaggguucauuccccU..   | 5    | 1 | seq |
| .....cggaccaggguucauuccccAu..  | 1    | 1 | seq |
| .....cggaccaggguucauuccccu..   | 10   | 0 | seq |
| .....cggaccaggguucauucccccA..  | 3    | 1 | seq |
| .....ggaccaggguucauuccccc..    | 3    | 0 | seq |
| .....ccaggguucauuccccu..       | 1    | 0 | seq |

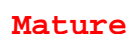[illegible]

## Star

## Mature

|                                                                                                                                                         |     |   |     |
|---------------------------------------------------------------------------------------------------------------------------------------------------------|-----|---|-----|
| ucuugguuuaugauugcggggaauguugucuggcucgagguc <u>auu</u> cagauuugaagauu <u>u</u> cugagcugagugacg <u>ucgg</u> accaggcu <u>cau</u> u <u>cccc</u> ccaacugugau |     |   |     |
| .....ggaauguugucuggcucgGgg.....                                                                                                                         | 1   | 1 | seq |
| .....ggaauguugucuggcuUgagg.....                                                                                                                         | 1   | 1 | seq |
| .....ggaauguugucuggcucgaggu.....                                                                                                                        | 1   | 0 | seq |
| .....gaauguugucuggcucA.....                                                                                                                             | 1   | 1 | seq |
| .....gaauguugucuggcucgag.....                                                                                                                           | 1   | 0 | seq |
| .....gaaCguugucuggcucgagg.....                                                                                                                          | 1   | 1 | seq |
| .....gaauguugucuggcucgagg.....                                                                                                                          | 15  | 0 | seq |
| .....gaauguugucuggcucgaggG.....                                                                                                                         | 2   | 1 | seq |
| .....gaauguugucuggcucgaggu.....                                                                                                                         | 67  | 0 | seq |
| .....gaauguugucuggcucgUggu.....                                                                                                                         | 1   | 1 | seq |
| .....gaauguugucuggcucgaggA.....                                                                                                                         | 2   | 1 | seq |
| .....gaauguuCuugucucgaggu.....                                                                                                                          | 1   | 1 | seq |
| .....gaauguugucuggcucgagguA.....                                                                                                                        | 1   | 1 | seq |
| .....gaauguugucuggcucgagguU.....                                                                                                                        | 1   | 1 | seq |
| .....gaauguugucuggcucgagguC.....                                                                                                                        | 4   | 0 | seq |
| .....aauguugucuggcucgagguA.....                                                                                                                         | 1   | 1 | seq |
| .....aauguugucuggcucgagguC.....                                                                                                                         | 6   | 0 | seq |
| .....aauguugucuggcucgagguU.....                                                                                                                         | 2   | 1 | seq |
| .....auguAguugucuggcucgaggu.....                                                                                                                        | 1   | 1 | seq |
| .....uguugucuggcucgaggucauu.....                                                                                                                        | 1   | 0 | seq |
| .....uc <u>u</u> ucAagcugagugacg.....                                                                                                                   | 1   | 1 | seq |
| .....cu <u>u</u> cAagcugagugacgu.....                                                                                                                   | 1   | 1 | seq |
| .....uucAagcugagugacguc.....                                                                                                                            | 1   | 1 | seq |
| .....uucAagcugagugacgucg.....                                                                                                                           | 1   | 1 | seq |
| .....uucAagcugagugacgucgg.....                                                                                                                          | 1   | 1 | seq |
| .....cugagugacgucggacca.....                                                                                                                            | 1   | 0 | seq |
| .....ugagugacAucggaccaggu.....                                                                                                                          | 1   | 1 | seq |
| .....agugacgucggaccaggucauu.....                                                                                                                        | 2   | 0 | seq |
| .....ugacgucggaccaggucauu.....                                                                                                                          | 1   | 0 | seq |
| .....acgucggaccaggucau <u>u</u> cccc.....                                                                                                               | 1   | 0 | seq |
| .....gucggaccaggucau <u>u</u> cccc.....                                                                                                                 | 2   | 0 | seq |
| .....gucggaccaggucau <u>u</u> ccA.....                                                                                                                  | 2   | 1 | seq |
| .....Cucggaccaggucau <u>u</u> cccc.....                                                                                                                 | 1   | 1 | seq |
| .....ucggGccaggucauu.....                                                                                                                               | 1   | 1 | seq |
| .....ucggaccaggucauA.....                                                                                                                               | 1   | 1 | seq |
| .....ucggaccagguCuu.....                                                                                                                                | 2   | 1 | seq |
| .....ucggaccaggucauu.....                                                                                                                               | 146 | 0 | seq |
| .....ucggacUagggucauu.....                                                                                                                              | 1   | 1 | seq |
| .....ucggaccaggucaCu.....                                                                                                                               | 1   | 1 | seq |
| .....ucggaccaggucauC.....                                                                                                                               | 15  | 1 | seq |
| .....ucggaccaggucauuA.....                                                                                                                              | 1   | 1 | seq |
| .....ucggaccaggucauuU.....                                                                                                                              | 4   | 1 | seq |
| .....ucggaccaggucauuc.....                                                                                                                              | 21  | 0 | seq |
| .....ucggaccagguCcauucc.....                                                                                                                            | 1   | 1 | seq |
| .....ucggaccaggucauucU.....                                                                                                                             | 10  | 1 | seq |
| .....ucggaccaggucauCucc.....                                                                                                                            | 1   | 1 | seq |
| .....ucggaccaggucauuUc.....                                                                                                                             | 1   | 1 | seq |
| .....ucggaccaggucauucc.....                                                                                                                             | 88  | 0 | seq |
| .....ucggaUcagggucauucc.....                                                                                                                            | 1   | 1 | seq |
| .....ucggaccaggucauucG.....                                                                                                                             | 1   | 1 | seq |
| .....ucggaccaggucauucA.....                                                                                                                             | 4   | 1 | seq |
| .....ucggacUagggucauucc.....                                                                                                                            | 1   | 1 | seq |
| .....ucAgaaccaggucauucc.....                                                                                                                            | 1   | 1 | seq |
| .....ucggaccagguCcauucc.....                                                                                                                            | 1   | 1 | seq |
| .....ucgUaccaggucauucc.....                                                                                                                             | 1   | 1 | seq |
| .....uUggaccaggucauucc.....                                                                                                                             | 1   | 1 | seq |
| .....ucggaccaggucauucAc.....                                                                                                                            | 1   | 1 | seq |
| .....Ncggaccaggucauucc.....                                                                                                                             | 1   | 1 | seq |
| .....ucggaAcagggucauucc.....                                                                                                                            | 1   | 1 | seq |
| .....ucggaccaggucauucc.....                                                                                                                             | 147 | 0 | seq |
| .....ucCgaccaggucauucc.....                                                                                                                             | 1   | 1 | seq |
| .....ucggaccaggucauCccc.....                                                                                                                            | 1   | 1 | seq |
| .....ucggaccaggucaGucc.....                                                                                                                             | 1   | 1 | seq |
| .....ucggaccGgggucauucc.....                                                                                                                            | 1   | 1 | seq |
| .....ucggaUcagggucauucc.....                                                                                                                            | 1   | 1 | seq |
| .....ucggacAagggucauucc.....                                                                                                                            | 1   | 1 | seq |
| .....ucggaccaggucauuccA.....                                                                                                                            | 4   | 1 | seq |
| .....ucggaccagguCcauucc.....                                                                                                                            | 34  | 1 | seq |
| .....ucggaccaggucauuUccc.....                                                                                                                           | 5   | 1 | seq |
| .....Acggaccaggucauucc.....                                                                                                                             | 7   | 1 | seq |

## Star

## Mature

ucuugguuuauugauugcggggaauuguucuggcucgaggucuuuagauuugaagauuucucgagcugagugacgucggaccaggcucauuccccccaacugugau

|                                    |      |   |     |
|------------------------------------|------|---|-----|
| .....ucggaccaggcucauuccAcc.....    | 10   | 1 | seq |
| .....ucggaccaggcucaGucccc.....     | 3    | 1 | seq |
| .....ucggaccaggcucauuccNc.....     | 1    | 1 | seq |
| .....ucggauUcaggcucauucccc.....    | 4    | 1 | seq |
| .....uUggaccaggcucauucccc.....     | 7    | 1 | seq |
| .....ucggaccaggcuucUucccc.....     | 1    | 1 | seq |
| .....ucgUaccaggcucauucccc.....     | 2    | 1 | seq |
| .....ucggaccaggcucaCucccc.....     | 9    | 1 | seq |
| .....ucggaccaggcuucCuucccc.....    | 4    | 1 | seq |
| .....ucggaccaggcucauGccc.....      | 1    | 1 | seq |
| .....ucggaccaggcuuAauucccc.....    | 1    | 1 | seq |
| .....ucggaccaggcCucauucccc.....    | 25   | 1 | seq |
| .....ucAgaccaggcucauucccc.....     | 9    | 1 | seq |
| .....ucggaccCggcucauucccc.....     | 2    | 1 | seq |
| .....ucggaccaggcucauuccAc.....     | 7    | 1 | seq |
| .....ucggaccaCgcucauucccc.....     | 1    | 1 | seq |
| .....ucUgaccaggcucauucccc.....     | 2    | 1 | seq |
| .....ucggaccaggcucauGcccc.....     | 1    | 1 | seq |
| .....ucggaccaggcuucGuucccc.....    | 34   | 1 | seq |
| .....ucggaccaggGuucauucccc.....    | 4    | 1 | seq |
| .....uAggaccaggcucauucccc.....     | 1    | 1 | seq |
| .....Gcggaccaggcucauucccc.....     | 12   | 1 | seq |
| .....ucggaccaggcucauAccc.....      | 2    | 1 | seq |
| .....ucggUccaggcucauucccc.....     | 2    | 1 | seq |
| .....ucggGccaggcucauucccc.....     | 33   | 1 | seq |
| .....ucggaccagUcucauucccc.....     | 1    | 1 | seq |
| .....ucggaccaggcucauuccGcc.....    | 1    | 1 | seq |
| .....ucggaccaggcucauuccccG.....    | 47   | 1 | seq |
| .....ucggauAaccaggcucauucccc.....  | 4    | 1 | seq |
| .....ucggauGcaggcucauucccc.....    | 1    | 1 | seq |
| .....ucggacUaggcucauucccc.....     | 10   | 1 | seq |
| .....ucggaccaggcucauucccU.....     | 1444 | 1 | seq |
| .....ucggaccaAgcucauucccc.....     | 7    | 1 | seq |
| .....ucggaccagCcucauucccc.....     | 1    | 1 | seq |
| .....ucggaccGggcucauucccc.....     | 20   | 1 | seq |
| .....ucggaccUggcucauucccc.....     | 5    | 1 | seq |
| .....ucggaccaggcuGcauucccc.....    | 1    | 1 | seq |
| .....ucggaccaggcucauucccc.....     | 40   | 1 | seq |
| .....ucggaccaggcucauuccUcc.....    | 11   | 1 | seq |
| .....ucggaccaggcuuUauucccc.....    | 9    | 1 | seq |
| .....ucggaccaggcuAcauucccc.....    | 10   | 1 | seq |
| .....ucggaccaggcucauAcccc.....     | 3    | 1 | seq |
| .....ucggaccaggcucauucccc.....     | 8863 | 0 | seq |
| .....ucggaccaggcucauucccA.....     | 323  | 1 | seq |
| .....ucgAaccaggcucauucccc.....     | 5    | 1 | seq |
| .....ucggaccaggUucauucccc.....     | 5    | 1 | seq |
| .....ucggaccagAcucauucccc.....     | 3    | 1 | seq |
| .....ucggaccaggAucauucccc.....     | 4    | 1 | seq |
| .....ucCgaccaggcucauucccc.....     | 1    | 1 | seq |
| .....Ncggaccaggcucauucccc.....     | 7    | 1 | seq |
| .....ucggaccaUgcucauucccc.....     | 3    | 1 | seq |
| .....ucggaccaggcAucauucccc.....    | 3    | 1 | seq |
| .....ucggaccaggcucauuccccA.....    | 301  | 1 | seq |
| .....ucggaccaggcucauuccccG.....    | 21   | 1 | seq |
| .....ucggaccaggcucauuccGcc.....    | 1    | 1 | seq |
| .....ucggaccaggcucauucccccc.....   | 38   | 0 | seq |
| .....ucggaccaggcCucauucccccc.....  | 1    | 1 | seq |
| .....ucggaccaggcucauUccccc.....    | 1    | 1 | seq |
| .....ucggaccaggcucauuccccccA.....  | 1    | 1 | seq |
| .....ucggaccaggcucauuccccccaC..... | 1    | 1 | seq |
| .....cggaccaggcuuUauuc.....        | 1    | 1 | seq |
| .....Uggaccaggcucauucc.....        | 1    | 1 | seq |
| .....cggaccaggcucauucc.....        | 6    | 0 | seq |
| .....cggaccaggcucauucc.....        | 4    | 0 | seq |
| .....cggaccaggcucauucccU.....      | 5    | 1 | seq |
| .....cggaccaggcucauucccc.....      | 8    | 0 | seq |
| .....cggaccaggcucauucccccc.....    | 23   | 0 | seq |
| .....cggaccaggcucauuccccA.....     | 3    | 1 | seq |
| .....cggaccaggcucauuccccccc.....   | 1    | 0 | seq |
| .....cggaccaggcucauuccccccU.....   | 2    | 1 | seq |

Star

Mature

|                                                                                                                                                                   |   |   |     |
|-------------------------------------------------------------------------------------------------------------------------------------------------------------------|---|---|-----|
| ucuuggguuuau <del>g</del> auugcg <del>g</del> ggga <del>u</del> guugucuggcucgaggucauucagauuugaagauuucucgagcugagugacg <del>g</del> ucggaccaggcucauuccccccaacugugau |   |   |     |
| .....cggaccaggcucauuccccA.....                                                                                                                                    | 2 | 1 | seq |
| .....ggaccaggcucauucccc.....                                                                                                                                      | 3 | 0 | seq |

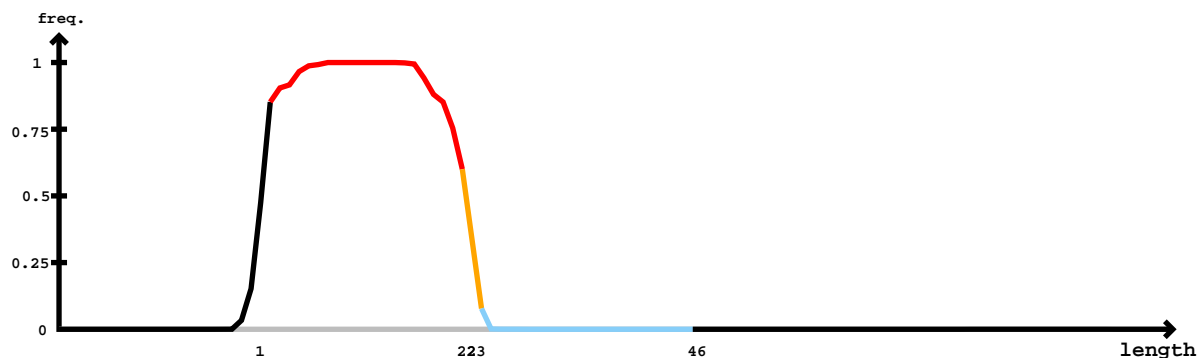

|                                                                                                 | reads | mm | sample |
|-------------------------------------------------------------------------------------------------|-------|----|--------|
| ..(((((((.(.(((((((((((((((((.((((.....))))).)))).)))....-)).(((((((.(.....)).)))))....-)))))). |       |    |        |
| .cUuuuaggcccauggaaguuug                                                                         | 1     | 1  | seq    |
| .cauCuaaggcccauggaaguuug                                                                        | 1     | 1  | seq    |
| .cauuuaggcccauggaaguuuga                                                                        | 1     | 0  | seq    |
| .Aauuuaggcccauggaaguuugagg                                                                      | 1     | 1  | seq    |
| .cUuuuaggcccauggaaguuugagg                                                                      | 1     | 1  | seq    |
| .cUuuuaggcccauggaaguuugaggc                                                                     | 1     | 1  | seq    |
| .cGuuuaggcccauggaaguuugaggcaaug                                                                 | 1     | 1  | seq    |
| .aAuuaaggcccauggaagu                                                                            | 1     | 1  | seq    |
| .Nuuuaggcccauggaaguu                                                                            | 1     | 1  | seq    |
| .Uuuuaggcccauggaaguuugagg                                                                       | 2     | 1  | seq    |
| .Uuuuaggcccauggaaguuugaggc                                                                      | 1     | 1  | seq    |
| .auGuaggcccauggaaguuugaggc                                                                      | 1     | 1  | seq    |
| .Nuuuaggcccauggaaguuugaggca                                                                     | 1     | 1  | seq    |
| .Uuuuaggcccauggaaguuugaggcca                                                                    | 2     | 1  | seq    |
| .Guuuaggcccauggaaguuugaggcaaug                                                                  | 1     | 1  | seq    |
| .uuuGggcccauggaaguu                                                                             | 1     | 1  | seq    |
| .uuuaggcccauggaagAu                                                                             | 2     | 1  | seq    |
| .uuuaggcccauggaaguG                                                                             | 2     | 1  | seq    |
| .Auuaaggcccauggaaguu                                                                            | 1     | 1  | seq    |
| .uuuaggcccauggaaguu                                                                             | 127   | 0  | seq    |
| .uuuaggcUauggaaguu                                                                              | 1     | 1  | seq    |
| .uuuaggcccauggaagGu                                                                             | 1     | 1  | seq    |
| .uuuaggccaCggaaguu                                                                              | 1     | 1  | seq    |
| .uuCaggcccauggaaguu                                                                             | 1     | 1  | seq    |
| .uuuaggcccauggaaguuu                                                                            | 81    | 0  | seq    |
| .uuuaggcccauggGaguuu                                                                            | 1     | 1  | seq    |
| .uuuaggcccauggaaguuAu                                                                           | 1     | 1  | seq    |
| .uuuaggcccGuggaaguuu                                                                            | 1     | 1  | seq    |
| .uuuaggcccauggUaguuu                                                                            | 1     | 1  | seq    |
| .uuuaggcccauggaaguCu                                                                            | 2     | 1  | seq    |
| .uuuaggcccauggaaguuC                                                                            | 5     | 1  | seq    |
| .uuuaggcUauggaaguuug                                                                            | 2     | 1  | seq    |
| .uuuaggcccauggaaguuuA                                                                           | 11    | 1  | seq    |
| .Guuaggcccauggaaguuug                                                                           | 1     | 1  | seq    |

## Star

|       |                           |                 |                                |                            |                      |      |   |     |
|-------|---------------------------|-----------------|--------------------------------|----------------------------|----------------------|------|---|-----|
| u     | aaaaagacuauggucuuu        | aggccauggaaguuu | aggccaauggcaaauggcaaaugugcuuaa | auguucaaaaauugcacaagcacuaa | augcagugaacgaguuuuuc |      |   |     |
| ..... | uuuaggccauggaaguuug       | .....           | aggcaaaauacuaa                 | ugugcuuaa                  |                      | 390  | 0 | seq |
| ..... | Cuuaggccauggaaguuug       | .....           |                                |                            |                      | 2    | 1 | seq |
| ..... | uuCaggccauggaaguuug       | .....           |                                |                            |                      | 1    | 1 | seq |
| ..... | uuuaggccauggaaguuCg       | .....           |                                |                            |                      | 1    | 1 | seq |
| ..... | uuuaggccauggaaguuuC       | .....           |                                |                            |                      | 1    | 1 | seq |
| ..... | uuuaggccaAggaaguuug       | .....           |                                |                            |                      | 1    | 1 | seq |
| ..... | uuuaggccauggaGguuuug      | .....           |                                |                            |                      | 1    | 1 | seq |
| ..... | uuuaggccauggGaguuug       | .....           |                                |                            |                      | 4    | 1 | seq |
| ..... | uuuGggccauggaaguuug       | .....           |                                |                            |                      | 1    | 1 | seq |
| ..... | Cuuaggccauggaaguuuga      | .....           |                                |                            |                      | 1    | 1 | seq |
| ..... | uuuaggccauggGaguuuga      | .....           |                                |                            |                      | 1    | 1 | seq |
| ..... | uuuaggccauggaaguuugG      | .....           |                                |                            |                      | 12   | 1 | seq |
| ..... | uuuaggccaCggaaguuuga      | .....           |                                |                            |                      | 1    | 1 | seq |
| ..... | uuuaggccaugggaagCuuga     | .....           |                                |                            |                      | 1    | 1 | seq |
| ..... | uuCaggccauggaaguuuga      | .....           |                                |                            |                      | 1    | 1 | seq |
| ..... | uuuaggccauggaaguuuga      | .....           |                                |                            |                      | 327  | 0 | seq |
| ..... | uuuaggccauggaaguuugU      | .....           |                                |                            |                      | 2    | 1 | seq |
| ..... | uuuaggccGuggaaguuuga      | .....           |                                |                            |                      | 1    | 1 | seq |
| ..... | uuuaggccauggaaguuugGg     | .....           |                                |                            |                      | 2    | 1 | seq |
| ..... | uuuaggccaugggaaguuugaC    | .....           |                                |                            |                      | 1    | 1 | seq |
| ..... | Cuuaggccauggaaguuugag     | .....           |                                |                            |                      | 1    | 1 | seq |
| ..... | uuuaggccUuggaaguuugag     | .....           |                                |                            |                      | 1    | 1 | seq |
| ..... | Auuaggccauggaaguuugag     | .....           |                                |                            |                      | 1    | 1 | seq |
| ..... | uuuaggccauggGaguuugag     | .....           |                                |                            |                      | 1    | 1 | seq |
| ..... | uuuaggccauggaGguuuugag    | .....           |                                |                            |                      | 2    | 1 | seq |
| ..... | uuuaggccauggaaguuugag     | .....           |                                |                            |                      | 197  | 0 | seq |
| ..... | uuuaggccaGggaaguuugagg    | .....           |                                |                            |                      | 1    | 1 | seq |
| ..... | uuuagUccauggaaguuugagg    | .....           |                                |                            |                      | 2    | 1 | seq |
| ..... | uuCaggccauggaaguuugagg    | .....           |                                |                            |                      | 1    | 1 | seq |
| ..... | uuuaggccauggaaguuugagA    | .....           |                                |                            |                      | 15   | 1 | seq |
| ..... | uuuaggccauggaagCuugagg    | .....           |                                |                            |                      | 1    | 1 | seq |
| ..... | uuuaggccauggGaguuugagg    | .....           |                                |                            |                      | 1    | 1 | seq |
| ..... | uuuaggccauggaaguuugagg    | .....           |                                |                            |                      | 179  | 0 | seq |
| ..... | Guuaggccauggaaguuugagg    | .....           |                                |                            |                      | 1    | 1 | seq |
| ..... | uuuaggcGauggaaguuugagg    | .....           |                                |                            |                      | 1    | 1 | seq |
| ..... | uuuaggccaCggaaguuugagg    | .....           |                                |                            |                      | 1    | 1 | seq |
| ..... | uuuaggccauggaaguuugagU    | .....           |                                |                            |                      | 3    | 1 | seq |
| ..... | uuuaggccauggaaguuugUgg    | .....           |                                |                            |                      | 1    | 1 | seq |
| ..... | uuuaggccauggaaguuugagC    | .....           |                                |                            |                      | 1    | 1 | seq |
| ..... | uuuaggccGuggaaguuugaggc   | .....           |                                |                            |                      | 1    | 1 | seq |
| ..... | uuuaggccauggaaguuugagCc   | .....           |                                |                            |                      | 2    | 1 | seq |
| ..... | uuuGggccauggaaguuugaggc   | .....           |                                |                            |                      | 1    | 1 | seq |
| ..... | Guuaggccauggaaguuugaggc   | .....           |                                |                            |                      | 1    | 1 | seq |
| ..... | uuuaggccauggaaguuCgaggc   | .....           |                                |                            |                      | 1    | 1 | seq |
| ..... | Cuuaggccauggaaguuugaggc   | .....           |                                |                            |                      | 3    | 1 | seq |
| ..... | uuuaggccauggaaguuugGggc   | .....           |                                |                            |                      | 3    | 1 | seq |
| ..... | uuuaggccauggaaguuugaggG   | .....           |                                |                            |                      | 3    | 1 | seq |
| ..... | uuuaggccauggaaguuugUggc   | .....           |                                |                            |                      | 1    | 1 | seq |
| ..... | uuuaggccauggaGguuuugaggc  | .....           |                                |                            |                      | 2    | 1 | seq |
| ..... | uuuaggccauggaaguuugCggc   | .....           |                                |                            |                      | 1    | 1 | seq |
| ..... | uuuaggccauggaaguuugaggc   | .....           |                                |                            |                      | 314  | 0 | seq |
| ..... | uuuaggccauggaagCuugaggc   | .....           |                                |                            |                      | 2    | 1 | seq |
| ..... | uCuaggccauggaaguuugaggc   | .....           |                                |                            |                      | 1    | 1 | seq |
| ..... | uuuaggccauggaaguuugagAca  | .....           |                                |                            |                      | 2    | 1 | seq |
| ..... | Auuaggccauggaaguuugaggca  | .....           |                                |                            |                      | 1    | 1 | seq |
| ..... | uuuaggccauggaagCuugaggca  | .....           |                                |                            |                      | 3    | 1 | seq |
| ..... | uuuaggccUuggaaguuugaggca  | .....           |                                |                            |                      | 1    | 1 | seq |
| ..... | uuuaggccauggaaguuugaggca  | .....           |                                |                            |                      | 1106 | 0 | seq |
| ..... | uuuaggccauggGaguuugaggca  | .....           |                                |                            |                      | 3    | 1 | seq |
| ..... | Nuuaggccauggaaguuugaggca  | .....           |                                |                            |                      | 1    | 1 | seq |
| ..... | uuuGggccauggaaguuugaggca  | .....           |                                |                            |                      | 1    | 1 | seq |
| ..... | uuuaggcUauggaaguuugaggca  | .....           |                                |                            |                      | 1    | 1 | seq |
| ..... | uuuaggccauggaaguuugaCgca  | .....           |                                |                            |                      | 1    | 1 | seq |
| ..... | uuuaggccauggaaguuCugaggca | .....           |                                |                            |                      | 5    | 1 | seq |
| ..... | uuuaggccauggaaguuugaUgca  | .....           |                                |                            |                      | 1    | 1 | seq |
| ..... | uuuaggccauggaGguuuugaggca | .....           |                                |                            |                      | 5    | 1 | seq |
| ..... | Cuuaggccauggaaguuugaggca  | .....           |                                |                            |                      | 1    | 1 | seq |
| ..... | uuuaggccaugggaaguuugaggcG | .....           |                                |                            |                      | 62   | 1 | seq |
| ..... | uuuaggccauggaaguuCgaggca  | .....           |                                |                            |                      | 1    | 1 | seq |
| ..... | uuGaggccauggaaguuugaggca  | .....           |                                |                            |                      | 1    | 1 | seq |

# Mature Star

|                                                                                                                  |     |   |     |
|------------------------------------------------------------------------------------------------------------------|-----|---|-----|
| uaaaaagacuauggucuuuaggccauggaaguuuaggccauggcaaaauaucuaaugugcuuauaauguuacaaaauugcacaaagcacuaaagcagugaaacgaguuuuuc |     |   |     |
| .....uuuaggccauggaaguuuagagCca.....                                                                              | 4   | 1 | seq |
| .....uCuaggccauggaaguuuagaggca.....                                                                              | 3   | 1 | seq |
| .....uuuagUccauggaaguuuagaggca.....                                                                              | 1   | 1 | seq |
| .....uuuaggccGuggaaguuuagaggca.....                                                                              | 6   | 1 | seq |
| .....uuCaggccauggaaguuuagaggca.....                                                                              | 2   | 1 | seq |
| .....uuuaggccauggUaguuuagaggca.....                                                                              | 2   | 1 | seq |
| .....uuuaggccauggaaguuuugUggca.....                                                                              | 2   | 1 | seq |
| .....uuuaggccauggaaguuuugGggca.....                                                                              | 8   | 1 | seq |
| .....uuuaggccaCggaaguuuagaggca.....                                                                              | 5   | 1 | seq |
| .....uuuaggccauggaaguuuagAgca.....                                                                               | 1   | 1 | seq |
| .....uuuaggccauggaaguuuAaggca.....                                                                               | 1   | 1 | seq |
| .....uuuaggccauggaaguuuagaggCC.....                                                                              | 1   | 1 | seq |
| .....uuuaggccauggaaguuuagaggCU.....                                                                              | 16  | 1 | seq |
| .....uuGaggccauggaaguuuagaggcaa.....                                                                             | 1   | 1 | seq |
| .....uuuaggccauggaaguuuugGggcaa.....                                                                             | 1   | 1 | seq |
| .....uuuGggccauggaaguuuagaggcaa.....                                                                             | 2   | 1 | seq |
| .....uuuaggccauggaaguuuagaggcaa.....                                                                             | 129 | 0 | seq |
| .....uuuaggccGuggaaguuuagaggcaa.....                                                                             | 1   | 1 | seq |
| .....uuuagUccauggaaguuuagaggcaa.....                                                                             | 1   | 1 | seq |
| .....uuuaggccauggaaguuuagaggcaU.....                                                                             | 3   | 1 | seq |
| .....uuuaggccauggaaguUcugaggcaa.....                                                                             | 1   | 1 | seq |
| .....uuuaggccauggaaguuuagaggcGa.....                                                                             | 1   | 1 | seq |
| .....uuuaggccauggaaguuuagaggcaG.....                                                                             | 6   | 1 | seq |
| .....uuuaggccauggaaguuuagaggcaGu.....                                                                            | 1   | 1 | seq |
| .....uuuaggccauggGaguuuagaggcaau.....                                                                            | 2   | 1 | seq |
| .....uuuaggccGuggaaguuuagaggcaau.....                                                                            | 1   | 1 | seq |
| .....Cuaggccauggaaguuuagaggcaau.....                                                                             | 1   | 1 | seq |
| .....uuGaggccauggaaguuuagaggcaau.....                                                                            | 1   | 1 | seq |
| .....uuuaggccauggaaguuuagaggcaaC.....                                                                            | 18  | 1 | seq |
| .....uuuaggccauggaaguuuAaggcaau.....                                                                             | 1   | 1 | seq |
| .....uuuaggccauggaaguuuagaggcaau.....                                                                            | 187 | 0 | seq |
| .....Nuaggccauggaaguuuagaggcaau.....                                                                             | 1   | 1 | seq |
| .....uuuGggccauggaaguuuagaggcaau.....                                                                            | 1   | 1 | seq |
| .....uuuaggccauggaaguUcgaggcaau.....                                                                             | 2   | 1 | seq |
| .....uuuaggccauggaaguuuagaggcaaug.....                                                                           | 1   | 0 | seq |
| .....uuuaggccauggaaguuuugGggcaaug.....                                                                           | 1   | 1 | seq |
| .....uuuaggccauggaaguuuagaggcaauAGC.....                                                                         | 1   | 1 | seq |
| .....uuuaggccauggaaguuuagaggcaauAgca.....                                                                        | 1   | 1 | seq |
| .....uuaggccauggaaguUG.....                                                                                      | 2   | 1 | seq |
| .....uuaggccauggUaguuu.....                                                                                      | 1   | 1 | seq |
| .....uuaggccaAggaaguuu.....                                                                                      | 1   | 1 | seq |
| .....uCaggccauggaaguuu.....                                                                                      | 1   | 1 | seq |
| .....uuaggccauggaaguuu.....                                                                                      | 285 | 0 | seq |
| .....uuaggccauggaGguuu.....                                                                                      | 2   | 1 | seq |
| .....uuaggccauggaaguUC.....                                                                                      | 29  | 1 | seq |
| .....uuaggccauggaaguCu.....                                                                                      | 1   | 1 | seq |
| .....uuaggccUuggaaguuu.....                                                                                      | 1   | 1 | seq |
| .....uuaggccauggGaguuu.....                                                                                      | 1   | 1 | seq |
| .....uuaggccauggaaguUAg.....                                                                                     | 1   | 1 | seq |
| .....uuaggccauggaaguUU.....                                                                                      | 3   | 1 | seq |
| .....uuaggccauggaagCuug.....                                                                                     | 2   | 1 | seq |
| .....uCaggccauggaaguuuug.....                                                                                    | 1   | 1 | seq |
| .....Nuaggccauggaaguuuug.....                                                                                    | 2   | 1 | seq |
| .....uuaggccauggaGguuuug.....                                                                                    | 7   | 1 | seq |
| .....uuaggccauggaaguCuug.....                                                                                    | 4   | 1 | seq |
| .....uuaggccGuggaaguuuug.....                                                                                    | 5   | 1 | seq |
| .....uuaggccauggGaguuuug.....                                                                                    | 4   | 1 | seq |
| .....uuaggccaCggaaguuuug.....                                                                                    | 3   | 1 | seq |
| .....uuaggccaugAaaguuuug.....                                                                                    | 1   | 1 | seq |
| .....uuaggccauggaaguUug.....                                                                                     | 1   | 1 | seq |
| .....uuaggccaugGaguuuug.....                                                                                     | 21  | 1 | seq |
| .....uuaggccaAggaaguuuug.....                                                                                    | 1   | 1 | seq |
| .....uuaggccauCgaaguuuug.....                                                                                    | 1   | 1 | seq |
| .....uuaggcUauggaaguuuug.....                                                                                    | 2   | 1 | seq |
| .....uuCggccauggaaguuuug.....                                                                                    | 1   | 1 | seq |
| .....uuGggccauggaaguuuug.....                                                                                    | 5   | 1 | seq |
| .....uGaggccauggaaguuuug.....                                                                                    | 1   | 1 | seq |
| .....uuaggccauggaaguUU.....                                                                                      | 1   | 1 | seq |
| .....uuagUccauggaaguuuug.....                                                                                    | 1   | 1 | seq |
| .....uuaggccauggaaguUCg.....                                                                                     | 3   | 1 | seq |



## Star

|                                                                                                        |      |   |     |
|--------------------------------------------------------------------------------------------------------|------|---|-----|
| .uuaggaacuaugggcuauuaggccaauggaaguuuaggccaauugcuaauggucuuagauguucaaaaauugcacuacuaauggcagugaacgaguuuuuc |      |   |     |
| .....uuaggccauGgaaguug.                                                                                | 2    | 1 | seq |
| .....uuaggccauggaaguug.                                                                                | 1344 | 0 | seq |
| .....uuaggccauggaaguuuAa.                                                                              | 1    | 1 | seq |
| .....uuaggccauggaaguuuugG.                                                                             | 24   | 1 | seq |
| .....uuaggccauggaaguUGga.                                                                              | 1    | 1 | seq |
| .....uuaggccauggaUGuuuga.                                                                              | 1    | 1 | seq |
| .....uuaggccauggaaguuuuga.                                                                             | 1104 | 0 | seq |
| ..Auaggccauggaaguuga.                                                                                  | 2    | 1 | seq |
| ..Nuaggccauggaaguuga.                                                                                  | 2    | 1 | seq |
| .....uuaggccaGggaaguuga.                                                                               | 1    | 1 | seq |
| .....uuaggccauggaaguugU.                                                                               | 11   | 1 | seq |
| .....uuaggccauggaGguuga.                                                                               | 2    | 1 | seq |
| .....uuaggccauggaaguCUga.                                                                              | 2    | 1 | seq |
| .....uuUggccauggaaguuga.                                                                               | 1    | 1 | seq |
| .....uuaggccauggaagGuuga.                                                                              | 2    | 1 | seq |
| .....uuaggccauggaaguuuCa.                                                                              | 2    | 1 | seq |
| .....uuaggccauggaagCuuga.                                                                              | 3    | 1 | seq |
| ..Cuaggccauggaaguuga.                                                                                  | 2    | 1 | seq |
| .....uuaggccaCggaaguuga.                                                                               | 1    | 1 | seq |
| ..Guaggccauggaaguuga.                                                                                  | 1    | 1 | seq |
| .....uuGggccauggaaguuga.                                                                               | 5    | 1 | seq |
| .....uuaggcccGuggaaguuga.                                                                              | 3    | 1 | seq |
| .....uuaggccauggaaguUCga.                                                                              | 1    | 1 | seq |
| .....uuaggccauggGaguuga.                                                                               | 7    | 1 | seq |
| .....uuaggccaAggaaguuga.                                                                               | 2    | 1 | seq |
| .....uuCggccauggaaguuga.                                                                               | 1    | 1 | seq |
| .....uuGggccauggaaguugag.                                                                              | 3    | 1 | seq |
| .....uuaggccauggaagCuugag.                                                                             | 1    | 1 | seq |
| .....uuaggccauggaGguugag.                                                                              | 1    | 1 | seq |
| ..Nuaggccauggaaguugag.                                                                                 | 2    | 1 | seq |
| .....uuaggccauggaaguugag.                                                                              | 308  | 0 | seq |
| .....uuaggccaCggaaguugag.                                                                              | 1    | 1 | seq |
| ..Auaggccauggaaguugag.                                                                                 | 1    | 1 | seq |
| .....uuaggccauggaaguUCgag.                                                                             | 3    | 1 | seq |
| ..uuagUccauggaaguugag.                                                                                 | 1    | 1 | seq |
| .....uuaggccauggaaguugGg.                                                                              | 3    | 1 | seq |
| .....uuaggccauggaaguugagA.                                                                             | 55   | 1 | seq |
| .....uuaggccaAggaaguugagg.                                                                             | 1    | 1 | seq |
| ..Cuaggccauggaaguugagg.                                                                                | 3    | 1 | seq |
| .....uuaggccauggaagCuugagg.                                                                            | 1    | 1 | seq |
| .....uuaggccauggaaguugaCG.                                                                             | 2    | 1 | seq |
| ..uuagUccauggaaguugagg.                                                                                | 1    | 1 | seq |
| .....uuaggccauggGaguugagg.                                                                             | 3    | 1 | seq |
| .....uuaggccauggaaguUCgagg.                                                                            | 3    | 1 | seq |
| .....uuaggccauggaagGuugagg.                                                                            | 2    | 1 | seq |
| ..Guaggccauggaaguugagg.                                                                                | 3    | 1 | seq |
| .....uuGggccauggaaguugagg.                                                                             | 2    | 1 | seq |
| .....uuaggccauggaaguUUagg.                                                                             | 1    | 1 | seq |
| .....uuaggccauggaaguugagU.                                                                             | 8    | 1 | seq |
| .....uuaggccauggaaguugagg.                                                                             | 955  | 0 | seq |
| .....uuaggccauggaaguugaUG.                                                                             | 1    | 1 | seq |
| .....uuaggccaCggaaguugagg.                                                                             | 2    | 1 | seq |
| .....uuaggcccGuggaaguugagg.                                                                            | 5    | 1 | seq |
| ..uCaggccauggaaguugagg.                                                                                | 1    | 1 | seq |
| .....uuaggccauggaaguugGgg.                                                                             | 9    | 1 | seq |
| .....uuaggccauggCaguugagg.                                                                             | 1    | 1 | seq |
| .....uuaggccauggaaguCugagg.                                                                            | 2    | 1 | seq |
| .....uuaggccauUGaaguugagg.                                                                             | 1    | 1 | seq |
| .....uuaggccauggaaguugagC.                                                                             | 3    | 1 | seq |
| .....uuaggccauggaGguugagg.                                                                             | 1    | 1 | seq |
| .....uuaggccauggaaguugUGg.                                                                             | 2    | 1 | seq |
| .....uuaggccauggaUGuuugaggc.                                                                           | 1    | 1 | seq |
| .....uuaggccauggaagGuugaggc.                                                                           | 2    | 1 | seq |
| .....uuaggccauggaaguCugaggc.                                                                           | 1    | 1 | seq |
| ..Nuaggccauggaaguugaggc.                                                                               | 2    | 1 | seq |
| .....uuGggccauggaaguugaggc.                                                                            | 6    | 1 | seq |
| .....uuaggccauggaaguugaggc.                                                                            | 1103 | 0 | seq |
| ..Guaggccauggaaguugaggc.                                                                               | 2    | 1 | seq |
| .....uuaggccauggaagCuugaggc.                                                                           | 2    | 1 | seq |
| .....uuaggccauggaaguAUgaggc.                                                                           | 1    | 1 | seq |

# Mature Star

|                                                                                                                        |      |   |     |
|------------------------------------------------------------------------------------------------------------------------|------|---|-----|
| uaaaaagacuaugggcauuuaggccaaggaaguuugaggccauggccaaauaucuaaugugcuuaaaauguuacaaaauugcacaagcacuacacuaaugcagugaaacgaguuuuuc |      |   |     |
| .....uuaggccaaggaaguuugUggc.....                                                                                       | 1    | 1 | seq |
| .....uuUggccaaggaaguuugaggc.....                                                                                       | 1    | 1 | seq |
| .....uuaggccaaggaaguuUGaggc.....                                                                                       | 2    | 1 | seq |
| .....uuaggccaaggaGguuuugaggc.....                                                                                      | 3    | 1 | seq |
| .....uuaggccaaggaaguuugGggc.....                                                                                       | 4    | 1 | seq |
| .....uuaggccCuggaaguuugaggc.....                                                                                       | 1    | 1 | seq |
| .....uuaggccauggUaguuugaggc.....                                                                                       | 1    | 1 | seq |
| .....uuaggccaaggaaguuugaggG.....                                                                                       | 8    | 1 | seq |
| .....uuaggccauggGaguuugaggc.....                                                                                       | 6    | 1 | seq |
| .....uuaggccGuggaaguuugaggc.....                                                                                       | 2    | 1 | seq |
| .....uuaggccaaggaaguuugagCc.....                                                                                       | 4    | 1 | seq |
| .....uuaggccUuggaaguuugaggc.....                                                                                       | 1    | 1 | seq |
| .....Cuaggccaaggaaguuugaggc.....                                                                                       | 7    | 1 | seq |
| .....uuaggccaaggaaguuugaUgc.....                                                                                       | 1    | 1 | seq |
| .....uCaggccaaggaaguuugaggc.....                                                                                       | 1    | 1 | seq |
| .....uuaggccaaggaaguuugagAc.....                                                                                       | 2    | 1 | seq |
| .....uuaggccaCggaaguuugaggc.....                                                                                       | 2    | 1 | seq |
| .....uuaggccaaggaaguuugaAgc.....                                                                                       | 1    | 1 | seq |
| .....uuaggccauggaagAuugaggc.....                                                                                       | 1    | 1 | seq |
| .....uuaggccaCggaaguuugaggca.....                                                                                      | 8    | 1 | seq |
| .....uuaggccaaggaaguuCugaggca.....                                                                                     | 8    | 1 | seq |
| .....Cuaggccaaggaaguuugaggca.....                                                                                      | 12   | 1 | seq |
| .....uuaggccaaggaagAuugaggca.....                                                                                      | 1    | 1 | seq |
| .....uuaggccauggUaguuugaggca.....                                                                                      | 1    | 1 | seq |
| .....uuaggccaaggaaguuGugaggca.....                                                                                     | 2    | 1 | seq |
| .....uuaggccGuggaaguuugaggca.....                                                                                      | 8    | 1 | seq |
| .....uuaggccaugggaaguuugUggca.....                                                                                     | 4    | 1 | seq |
| .....uuaggccauggGaguuugaggca.....                                                                                      | 14   | 1 | seq |
| .....uuCggccaaggaaguuugaggca.....                                                                                      | 1    | 1 | seq |
| .....uuaggccauUgaaguuugaggca.....                                                                                      | 2    | 1 | seq |
| .....uuUggccaaggaaguuugaggca.....                                                                                      | 1    | 1 | seq |
| .....uuaggccaAggaaguuugaggca.....                                                                                      | 3    | 1 | seq |
| .....uuagCccaaggaaguuugaggca.....                                                                                      | 1    | 1 | seq |
| .....uuaggccaaggaGguuuugaggca.....                                                                                     | 11   | 1 | seq |
| .....uuaggccaaggaaguuugaggGa.....                                                                                      | 1    | 1 | seq |
| .....uuaggccaugggaaguuugagUca.....                                                                                     | 3    | 1 | seq |
| .....uuaggccaugggaaguuugGggca.....                                                                                     | 25   | 1 | seq |
| .....uuaggccaugggaagCuugaggca.....                                                                                     | 15   | 1 | seq |
| .....uuaggccaGgggaaguuugaggca.....                                                                                     | 2    | 1 | seq |
| .....uuaggccaugggaaguuugaUgca.....                                                                                     | 2    | 1 | seq |
| .....uuaggccaugggaaguuugaAgca.....                                                                                     | 3    | 1 | seq |
| .....Nuaggccaugggaaguuugaggca.....                                                                                     | 9    | 1 | seq |
| .....uuGggccaugggaaguuugaggca.....                                                                                     | 19   | 1 | seq |
| .....uuaggccaugggaaguuuUaggca.....                                                                                     | 1    | 1 | seq |
| .....uuaggccaugggaaguuuLaggca.....                                                                                     | 1    | 1 | seq |
| .....uuaggccaugggaaguuugaggcU.....                                                                                     | 43   | 1 | seq |
| .....Auaggccaugggaaguuugaggca.....                                                                                     | 4    | 1 | seq |
| .....uuaggccaugggaagGuugaggca.....                                                                                     | 4    | 1 | seq |
| .....uuaggccUuggaaguuugaggca.....                                                                                      | 4    | 1 | seq |
| .....Guaggccaugggaaguuugaggca.....                                                                                     | 2    | 1 | seq |
| .....uuaggccaugggaaguuCgaggca.....                                                                                     | 6    | 1 | seq |
| .....uuaggccaugggaaguuAgaggca.....                                                                                     | 2    | 1 | seq |
| .....uuaggccaugggaaguuugaggca.....                                                                                     | 4630 | 0 | seq |
| .....uuaggcUauggaaguuugaggca.....                                                                                      | 7    | 1 | seq |
| .....uuaggccaugggaaguuAgaggca.....                                                                                     | 1    | 1 | seq |
| .....uuaggccaugggaCuuugaggca.....                                                                                      | 1    | 1 | seq |
| .....uuaggccaugggaaguuugaggcG.....                                                                                     | 210  | 1 | seq |
| .....uuaggccaugggaaguuugagCca.....                                                                                     | 14   | 1 | seq |
| .....uuaggccaugggaaguuugagAc.....                                                                                      | 7    | 1 | seq |
| .....uuaggccaugUaaguuugaggca.....                                                                                      | 1    | 1 | seq |
| .....uuaggccaugAaaguuugaggca.....                                                                                      | 4    | 1 | seq |
| .....uuaggccaugggaaguuugaggcC.....                                                                                     | 18   | 1 | seq |
| .....uuaggccauggaUguuuugaggca.....                                                                                     | 2    | 1 | seq |
| .....uuaggccCuggaaguuugaggca.....                                                                                      | 1    | 1 | seq |
| .....uCaggccaugggaaguuugaggca.....                                                                                     | 5    | 1 | seq |
| .....uuaggccaugggaaguuugaggcGa.....                                                                                    | 3    | 1 | seq |
| .....uuaggccauggGaguuugaggcaa.....                                                                                     | 2    | 1 | seq |
| .....uuaggccaugggaaguuugaggcaa.....                                                                                    | 552  | 0 | seq |
| .....uuaggccaugggaaguuCgaggcaa.....                                                                                    | 2    | 1 | seq |
| .....uuaggccauggUaguuugaggcaa.....                                                                                     | 1    | 1 | seq |

Star

UAAAAAGACUAGUUCAUUUAGGCCAUGGAAUUUUAGAGCAAUAGGCAAAUAUCUAAAUUAGCUAAAUAGUUUCAAAGUUUAGCACAAGCACUACACUAAUAGCAUUGAACGAGUUUUUAC

|                                         |      |   |     |
|-----------------------------------------|------|---|-----|
| .....uuaggccauggaGguuuuagggcaa.....     | 5    | 1 | seq |
| .....uuaggccaCggaaguuuagggcaa.....      | 2    | 1 | seq |
| .....uuaggccauggaaguuuagggcaG.....      | 6    | 1 | seq |
| .....uuaggccauggaaguuuagggcaC.....      | 1    | 1 | seq |
| .....uuaggccauggaaguuuagggcaU.....      | 4    | 1 | seq |
| .....uuaggccauggaaguuuagggGaa.....      | 1    | 1 | seq |
| .....uuaggccauggaUguuuagggcaa.....      | 1    | 1 | seq |
| .....uuaggccauggaaguuuaggagAcaa.....    | 1    | 1 | seq |
| .....uuaggccGuggaaguuuagggcaa.....      | 1    | 1 | seq |
| .....uuaggccauggaaguCugagggcaa.....     | 1    | 1 | seq |
| .....Cuaggccauggaaguuuagggcaa.....      | 3    | 1 | seq |
| .....uuaggccauggaagAuagggcaa.....       | 1    | 1 | seq |
| .....uuGggccauggaaguuuagggcaa.....      | 1    | 1 | seq |
| .....Auaggccauggaaguuuagggcaa.....      | 1    | 1 | seq |
| .....uuaggccauggaagCuagggcaa.....       | 1    | 1 | seq |
| .....Guaggccauggaaguuuagggcaa.....      | 1    | 1 | seq |
| .....uuaggccauggaaguuuAaggcaa.....      | 1    | 1 | seq |
| .....uuaggccauggaaguuuagggcUa.....      | 1    | 1 | seq |
| .....uuaggcUauggaaguuuagggcaa.....      | 1    | 1 | seq |
| .....uuaggccauggaaguuuagggcaa.....      | 2    | 1 | seq |
| .....uuaggGcauggaaguuuagggcaa.....      | 1    | 1 | seq |
| .....uuaggccauggaaguuuagggcaaG.....     | 5    | 1 | seq |
| .....uuaggccauggaaguuuagggcaGdu.....    | 2    | 1 | seq |
| .....uuGggccauggaaguuuagggcaau.....     | 2    | 1 | seq |
| .....uuaggccauggaaguuuagggcGau.....     | 1    | 1 | seq |
| .....uuaggccauggaaguuuagggcaaC.....     | 78   | 1 | seq |
| .....Cuaggccauggaaguuuagggcaau.....     | 1    | 1 | seq |
| .....uuaggccauggaaguuuagggcaau.....     | 630  | 0 | seq |
| .....uuaggccauggaaguCgaggcaau.....      | 1    | 1 | seq |
| .....uuaggccaCggaaguuuagggcaau.....     | 1    | 1 | seq |
| .....Guaggccauggaaguuuagggcaau.....     | 3    | 1 | seq |
| .....uuaggccauggaaguuuaggagAcaau.....   | 1    | 1 | seq |
| .....Nuaggccauggaaguuuagggcaau.....     | 1    | 1 | seq |
| .....uuaggccauggaagAuagggcaau.....      | 1    | 1 | seq |
| .....uuaggccauggGaguuuagggcaau.....     | 1    | 1 | seq |
| .....uuaggccauggaaguuuagggcaaA.....     | 4    | 1 | seq |
| .....uuaggccauggUaguuuagggcaau.....     | 1    | 1 | seq |
| .....uuaggccauggaUguuuagggcaau.....     | 1    | 1 | seq |
| .....uuaggccauggaaguuuagggcaau.....     | 1    | 1 | seq |
| .....uuaggccauggaGguuuagggcaau.....     | 4    | 1 | seq |
| .....uuaggccaugAaaguuuagggcaau.....     | 1    | 1 | seq |
| .....uuaggccGuggaaguuuagggcaau.....     | 4    | 1 | seq |
| .....uuUggccauggaaguuuagggcaau.....     | 1    | 1 | seq |
| .....uuaggcUauggaaguuuagggcaau.....     | 2    | 1 | seq |
| .....uuaggccauggaagCuagggcaau.....      | 1    | 1 | seq |
| .....uuaggccauggaaguuuagggcaauU.....    | 5    | 1 | seq |
| .....uuaggccauggGaguuuagggcaaug.....    | 1    | 1 | seq |
| .....uuaggccauggaaguuuagggcaaug.....    | 6    | 0 | seq |
| .....uuaggccauggaaguuuagggcaauAg.....   | 1    | 1 | seq |
| .....uuaggccauggaaguuuagggcaaugAc.....  | 1    | 1 | seq |
| .....uuaggccauggaaguuuagggcaaugAca..... | 1    | 1 | seq |
| .....uuaggccauggaaguuuagggcaauAgca..... | 1    | 1 | seq |
| .....uaggccauggaaguUAg.....             | 3    | 1 | seq |
| .....uaggccauggaaguGug.....             | 3    | 1 | seq |
| .....uaggccauggaGguuuug.....            | 10   | 1 | seq |
| .....uaggccauggaagAuug.....             | 3    | 1 | seq |
| .....uaggccauggaaguuuA.....             | 64   | 1 | seq |
| .....uaggccauggaaguUg.....              | 3    | 1 | seq |
| .....uaggccauggaagGuug.....             | 1    | 1 | seq |
| .....uaggccauggaUguuuug.....            | 1    | 1 | seq |
| .....uaggccaCggaaguuuug.....            | 7    | 1 | seq |
| .....uaggGcauggaaguuuug.....            | 1    | 1 | seq |
| .....uUggccauggaaguuuug.....            | 4    | 1 | seq |
| .....uaggccauggaaguAuug.....            | 2    | 1 | seq |
| .....uaggccauggaaguCug.....             | 8    | 1 | seq |
| .....uaggccauggaaguuuC.....             | 3    | 1 | seq |
| .....uaggccauggaaguuuug.....            | 3268 | 0 | seq |
| .....uaggccauggaaguuuU.....             | 2    | 1 | seq |
| .....uaggccauggaaguUcg.....             | 13   | 1 | seq |
| .....uGggccauggaaguuuug.....            | 8    | 1 | seq |

# Mature Star

|                                                                                                                        |      |   |     |
|------------------------------------------------------------------------------------------------------------------------|------|---|-----|
| uaaaaagacuauaggcuauuuaggccauggaaguuuaggccauggcaaaauaucuaaugugcuuauaauguucaaaaauugcacaagcacuacacuaaugcagugaaacgaguuuuuc |      |   |     |
| .....uaggccauggUaguuug.....                                                                                            | 1    | 1 | seq |
| .....Naggccauggaaguuuug.....                                                                                           | 5    | 1 | seq |
| .....uaggcUauggaaguuuug.....                                                                                           | 5    | 1 | seq |
| .....uaggccauggaagCuug.....                                                                                            | 6    | 1 | seq |
| .....uGggccauggaaguuuug.....                                                                                           | 1    | 1 | seq |
| .....uaggccaAggaaguuuug.....                                                                                           | 1    | 1 | seq |
| .....uaggccaAggaaguuuuga.....                                                                                          | 1    | 1 | seq |
| .....uaggccauggaGguuuuga.....                                                                                          | 3    | 1 | seq |
| .....uaggcUauggaaguuuuga.....                                                                                          | 1    | 1 | seq |
| .....uaggccauggaaguUAga.....                                                                                           | 1    | 1 | seq |
| .....uaggccauggaaguCUga.....                                                                                           | 1    | 1 | seq |
| .....uaggccauggaagCuuga.....                                                                                           | 6    | 1 | seq |
| .....uaggccauggaaguUGga.....                                                                                           | 1    | 1 | seq |
| .....uaggccaCggaaguuuuga.....                                                                                          | 3    | 1 | seq |
| .....uGggccauggaaguuuuga.....                                                                                          | 2    | 1 | seq |
| .....uagUccauggaaguuuuga.....                                                                                          | 3    | 1 | seq |
| .....uUggccauggaaguuuuga.....                                                                                          | 2    | 1 | seq |
| .....uaggccauggaaguuuuga.....                                                                                          | 1613 | 0 | seq |
| .....uaggccauggaUguuuuga.....                                                                                          | 1    | 1 | seq |
| .....uaggccauggaaguUCga.....                                                                                           | 4    | 1 | seq |
| .....uaggccauggCaguuuuga.....                                                                                          | 2    | 1 | seq |
| .....uaggccauggaagGuugag.....                                                                                          | 1    | 1 | seq |
| .....uaggcUauggaaguuuugag.....                                                                                         | 1    | 1 | seq |
| .....uaggccauggaaguuuugag.....                                                                                         | 574  | 0 | seq |
| .....uUggccauggaaguuuugag.....                                                                                         | 1    | 1 | seq |
| .....uaggccauggaaguUCgag.....                                                                                          | 2    | 1 | seq |
| .....uaggccauggaaguuuugUg.....                                                                                         | 2    | 1 | seq |
| .....uaggccauggaaguuuugaC.....                                                                                         | 1    | 1 | seq |
| .....uaggccaCggaaguuuugag.....                                                                                         | 2    | 1 | seq |
| .....uaggccauggaaguuuuCag.....                                                                                         | 2    | 1 | seq |
| .....uaggccauggaaguUAugag.....                                                                                         | 1    | 1 | seq |
| .....uaggccauggaagCuugag.....                                                                                          | 1    | 1 | seq |
| .....uaggccauggaaguCUgag.....                                                                                          | 3    | 1 | seq |
| .....uGggccauggaaguuuugag.....                                                                                         | 2    | 1 | seq |
| .....uaggccauggaGguuuugag.....                                                                                         | 1    | 1 | seq |
| .....uaggccauggGaguuuugag.....                                                                                         | 5    | 1 | seq |
| .....uaggccaugUAaguuuugag.....                                                                                         | 1    | 1 | seq |
| .....uaggccauUGaaguuuugagg.....                                                                                        | 1    | 1 | seq |
| .....Naggccauggaaguuuugagg.....                                                                                        | 3    | 1 | seq |
| .....uaggccauggaaguGugagg.....                                                                                         | 1    | 1 | seq |
| .....uaggccauggaaguuuugagg.....                                                                                        | 2045 | 0 | seq |
| .....uaggccaAggaaguuuugagg.....                                                                                        | 2    | 1 | seq |
| .....uaggcUauggaaguuuugagg.....                                                                                        | 1    | 1 | seq |
| .....uGggccauggaaguuuugagg.....                                                                                        | 5    | 1 | seq |
| .....uaggccaCggaaguuuugagg.....                                                                                        | 4    | 1 | seq |
| .....uaggccauggaagCuugagg.....                                                                                         | 5    | 1 | seq |
| .....uGggccauggaaguuuugagg.....                                                                                        | 1    | 1 | seq |
| .....uaggccauggaaguuuugagU.....                                                                                        | 18   | 1 | seq |
| .....uaggccauggGaguuuugagg.....                                                                                        | 4    | 1 | seq |
| .....uaggccauggaaguuuugaUg.....                                                                                        | 1    | 1 | seq |
| .....uagUccauggaaguuuugagg.....                                                                                        | 2    | 1 | seq |
| .....uaggccauggaaguUCgagg.....                                                                                         | 8    | 1 | seq |
| .....uaggccauggaaguCUgagg.....                                                                                         | 2    | 1 | seq |
| .....uaggccauggaGguuuugagg.....                                                                                        | 8    | 1 | seq |
| .....uaggccauggaaguUAagg.....                                                                                          | 1    | 1 | seq |
| .....uaggccauggaaguuuugaCg.....                                                                                        | 1    | 1 | seq |
| .....uaggccaugUAaguuuugagg.....                                                                                        | 2    | 1 | seq |
| .....uaggccauggUaguuugagg.....                                                                                         | 2    | 1 | seq |
| .....uaggccauggaaguuuugagC.....                                                                                        | 7    | 1 | seq |
| .....uaggccauggaCguuuugagg.....                                                                                        | 1    | 1 | seq |
| .....uaggccauggaaguuuugagA.....                                                                                        | 137  | 1 | seq |
| .....uaggccauggaaguuuugUgg.....                                                                                        | 2    | 1 | seq |
| .....uaggccauggaagAUugagg.....                                                                                         | 1    | 1 | seq |
| .....uaggccUuggaaguuuugaggc.....                                                                                       | 2    | 1 | seq |
| .....uGggccauggaaguuuugaggc.....                                                                                       | 11   | 1 | seq |
| .....uaggccauggaagCuugaggc.....                                                                                        | 7    | 1 | seq |
| .....uaggccauggaaguuuugaggG.....                                                                                       | 10   | 1 | seq |
| .....uaggccauggaaguuuugaggc.....                                                                                       | 4862 | 0 | seq |
| .....uaggccauggaaguUGaggc.....                                                                                         | 1    | 1 | seq |
| .....uaggccaugUAaguuuugaggc.....                                                                                       | 1    | 1 | seq |

# Mature Star

|                                                                                                                       |       |   |     |
|-----------------------------------------------------------------------------------------------------------------------|-------|---|-----|
| uaaaaagacuaugggcauuuaggccaaggaaguuuaggccaaggcaaaauaucuaaugugcuuuaaauuucaaaaauugcacaagcacuacacuaaugcagugaaacgaguuuuuuc |       |   |     |
| .....uaggccaaggaaguuCgaggc.....                                                                                       | 10    | 1 | seq |
| .....uaggccaaggaUguuuagggc.....                                                                                       | 3     | 1 | seq |
| .....uaggccaCggaaguuuagggc.....                                                                                       | 9     | 1 | seq |
| .....uaggccaaggaaguuAgaggc.....                                                                                       | 1     | 1 | seq |
| .....uagUccaaggaaguuuagggc.....                                                                                       | 2     | 1 | seq |
| .....Naggccaaggaaguuuagggc.....                                                                                       | 6     | 1 | seq |
| .....uaggccaaggaagGuuagggc.....                                                                                       | 3     | 1 | seq |
| .....uaggcGauggaaguuuagggc.....                                                                                       | 2     | 1 | seq |
| .....uaggccaaggaaguuuagUgc.....                                                                                       | 1     | 1 | seq |
| .....uaggccaaggaaguuuAaggc.....                                                                                       | 2     | 1 | seq |
| .....uaggccaaggaaguuCugaggc.....                                                                                      | 7     | 1 | seq |
| .....uaggccaaggaagAuuagggc.....                                                                                       | 1     | 1 | seq |
| .....uaggccaaggaGguuagggc.....                                                                                        | 15    | 1 | seq |
| .....uaggcUauggaaguuuagggc.....                                                                                       | 8     | 1 | seq |
| .....uaCgccaaggaaguuuagggc.....                                                                                       | 2     | 1 | seq |
| .....uaggccaaggaaguuuagagCc.....                                                                                      | 22    | 1 | seq |
| .....uaggccCuggaaguuuagggc.....                                                                                       | 1     | 1 | seq |
| .....Caggccaaggaaguuuagggc.....                                                                                       | 16    | 1 | seq |
| .....uUggccaaggaaguuuagggc.....                                                                                       | 1     | 1 | seq |
| .....uaggccaaggaaguuuagagAc.....                                                                                      | 17    | 1 | seq |
| .....uaggccGuggaaguuuagggc.....                                                                                       | 12    | 1 | seq |
| .....uaggccaaggaaguuuagAgc.....                                                                                       | 3     | 1 | seq |
| .....uaggccaaggaaguuuagagGc.....                                                                                      | 13    | 1 | seq |
| .....uaggccaaggaaguuuUaggc.....                                                                                       | 1     | 1 | seq |
| .....uaggccaaggaaguuuagagGc.....                                                                                      | 2     | 1 | seq |
| .....uaggccaaggaaguuuAagagc.....                                                                                      | 4     | 1 | seq |
| .....uaggccaaggaaguuuUagagc.....                                                                                      | 2     | 1 | seq |
| .....uaggccaaggaaguuuagagUc.....                                                                                      | 2     | 1 | seq |
| .....uaggccaaggaaguuuugUggc.....                                                                                      | 2     | 1 | seq |
| .....uaggccaaggaaguuuugagGc.....                                                                                      | 1     | 1 | seq |
| .....uaggccaaggaaguuuagCgc.....                                                                                       | 3     | 1 | seq |
| .....uaggccaaggaaguuuagagGc.....                                                                                      | 681   | 1 | seq |
| .....uaggccaaggaaguuuagagGca.....                                                                                     | 14443 | 0 | seq |
| .....uaggccaaggaaguuuagagGca.....                                                                                     | 46    | 1 | seq |
| .....GaggccaaggaaguuuagagGca.....                                                                                     | 27    | 1 | seq |
| .....uaggGcaaggaaguuuagagGca.....                                                                                     | 3     | 1 | seq |
| .....uaggccaaggaaguuuagagGca.....                                                                                     | 8     | 1 | seq |
| .....uaggccaaggaaguuuagagGca.....                                                                                     | 10    | 1 | seq |
| .....uaggccaaggaaguuuagagGca.....                                                                                     | 2     | 1 | seq |
| .....uaggccaaggaaguuuAagGca.....                                                                                      | 1     | 1 | seq |
| .....uaggccaaggaaguuuagagCca.....                                                                                     | 38    | 1 | seq |
| .....uaggccaaggaaguuuagagGca.....                                                                                     | 7     | 1 | seq |
| .....uaggccaaggaaguuuagagAca.....                                                                                     | 33    | 1 | seq |
| .....uaggccaaggaaguuuugUggca.....                                                                                     | 12    | 1 | seq |
| .....uUggccaaggaaguuuagagGca.....                                                                                     | 8     | 1 | seq |
| .....uaggcGauggaaguuuagagGca.....                                                                                     | 2     | 1 | seq |
| .....uUggccaaggaaguuuagagGca.....                                                                                     | 4     | 1 | seq |
| .....uaggccaaggaaguuuagagGcU.....                                                                                     | 142   | 1 | seq |
| .....uaggccaaggaaguuuagagGca.....                                                                                     | 3     | 1 | seq |
| .....CaggccaaggaaguuuagagGca.....                                                                                     | 32    | 1 | seq |
| .....uaggccUuggaaguuuagagGca.....                                                                                     | 5     | 1 | seq |
| .....uaggccaaggaaguuuAagagGca.....                                                                                    | 2     | 1 | seq |
| .....uaggccaaggaaguuuagagGca.....                                                                                     | 3     | 1 | seq |
| .....uaggccaCggaaguuuagagGca.....                                                                                     | 21    | 1 | seq |
| .....uaggccCuggaaguuuagagGca.....                                                                                     | 1     | 1 | seq |
| .....uaggccaaggaaguuuagagGca.....                                                                                     | 46    | 1 | seq |
| .....uagCccaaggaaguuuagagGca.....                                                                                     | 1     | 1 | seq |
| .....uaggccaaggaaguuuagagGca.....                                                                                     | 1     | 1 | seq |
| .....uaggccaaggaaguuuagagGca.....                                                                                     | 3     | 1 | seq |
| .....uaggccaaggaaguuuagagUgc.....                                                                                     | 4     | 1 | seq |
| .....uaggccaaggaaguuuagagGca.....                                                                                     | 2     | 1 | seq |
| .....uaggccaaggaaguuuagagUca.....                                                                                     | 1     | 1 | seq |
| .....uaggccaaggaaguuuagagGca.....                                                                                     | 5     | 1 | seq |
| .....uaCgccaaggaaguuuagagGca.....                                                                                     | 1     | 1 | seq |
| .....uagUccaaggaaguuuagagGca.....                                                                                     | 4     | 1 | seq |
| .....uaggccaaggaaguuuagagGca.....                                                                                     | 4     | 1 | seq |
| .....uaggccaaggaaguuuagagGca.....                                                                                     | 3     | 1 | seq |
| .....uaggccaaggaaguuuagagGca.....                                                                                     | 22    | 1 | seq |

Star

uaaaaagacuauggucauuu**aggccauggaaguugaggca**auggcaaauaucuaaugugcuuaaauguucaaaauugcacaagcacuacuaaugcagugaacgaguuuuuc

|                                     |      |   |     |
|-------------------------------------|------|---|-----|
| .....uaggccauUgaaguuuagggca.....    | 1    | 1 | seq |
| .....uaggccauggaaguuugaCgca.....    | 5    | 1 | seq |
| .....uaggccauggaaguCugaggca.....    | 13   | 1 | seq |
| .....uaggccauggaaguuUaggca.....     | 2    | 1 | seq |
| .....uaggccauggaagAuugaggca.....    | 3    | 1 | seq |
| .....uaggcUauggaaguuuagggca.....    | 11   | 1 | seq |
| .....uaggccauggaagCuugaggca.....    | 41   | 1 | seq |
| .....uGggccauggaaguuuagggca.....    | 27   | 1 | seq |
| .....uaggccauggUaguuuagggca.....    | 7    | 1 | seq |
| .....Naggccauggaaguuuagggca.....    | 17   | 1 | seq |
| .....uaggccauggaaguuuagggcC.....    | 39   | 1 | seq |
| .....uaggccGuggaaguuuagggca.....    | 41   | 1 | seq |
| .....uaggccauggaaguuCgaggcaa.....   | 2    | 1 | seq |
| .....uaggccauggaaguuuaggCcaa.....   | 1    | 1 | seq |
| .....Naggccauggaaguuuagggcaa.....   | 4    | 1 | seq |
| .....uaggccauggaaguGugaggcaa.....   | 1    | 1 | seq |
| .....uaggccauggCaguuuagggcaa.....   | 1    | 1 | seq |
| .....uagCccauggaaguuuagggcaa.....   | 1    | 1 | seq |
| .....uaggccauggaaguuugaAgcaa.....   | 2    | 1 | seq |
| .....uaggcGauggaaguuuagggcaa.....   | 1    | 1 | seq |
| .....Gaggccauggaaguuuagggcaa.....   | 1    | 1 | seq |
| .....uaggccauggaaguCugaggcaa.....   | 2    | 1 | seq |
| .....uaggccauggaaguuuagggaC.....    | 3    | 1 | seq |
| .....uaggccauggaaguuuGggcaa.....    | 3    | 1 | seq |
| .....uaggccauggaaguuuagggcaU.....   | 17   | 1 | seq |
| .....Caggccauggaaguuuagggcaa.....   | 3    | 1 | seq |
| .....uaggccauggaGguuuagggcaa.....   | 5    | 1 | seq |
| .....uaggccauggaaguuuagggcaa.....   | 1482 | 0 | seq |
| .....uaggccaCggaaguuuagggcaa.....   | 4    | 1 | seq |
| .....uagUccauggaaguuuagggcaa.....   | 1    | 1 | seq |
| .....uaggcUauggaaguuuagggcaa.....   | 1    | 1 | seq |
| .....uaggccauggaaguuGgaggcaa.....   | 1    | 1 | seq |
| .....uaggccauggGaguuuagggcaa.....   | 9    | 1 | seq |
| .....uaggccauggaagGuuagggcaa.....   | 2    | 1 | seq |
| .....uaggccauggaaguuuagggcUa.....   | 1    | 1 | seq |
| .....uaggccGuggaaguuuagggcaa.....   | 3    | 1 | seq |
| .....uaggccauggaaguuUaggcaa.....    | 1    | 1 | seq |
| .....uaggccauggaaguuuagggcCa.....   | 2    | 1 | seq |
| .....uGggccauggaaguuuagggcaa.....   | 3    | 1 | seq |
| .....uaggccauggaagCuugaggcaa.....   | 3    | 1 | seq |
| .....uaggccauggaaguuuagggcaG.....   | 48   | 1 | seq |
| .....uaggccauggaaguuuaggUcaa.....   | 1    | 1 | seq |
| .....uaggccauggaaguuuagggcGa.....   | 7    | 1 | seq |
| .....uaggccauggaaguuuagggcaCu.....  | 1    | 1 | seq |
| .....uGggccauggaaguuuagggcaau.....  | 4    | 1 | seq |
| .....uaggccauggaGguuuagggcaau.....  | 4    | 1 | seq |
| .....uaggccauggaaguuuagggcaaC.....  | 177  | 1 | seq |
| .....uaggccauggaagGuuagggcaau.....  | 1    | 1 | seq |
| .....uaggccauggaaguuuaggAcaa.....   | 1    | 1 | seq |
| .....uaggccauggaaguuCgaggcaau.....  | 5    | 1 | seq |
| .....uaggccGuggaaguuuagggcaau.....  | 7    | 1 | seq |
| .....uaggccauggaaguuuaggUcaa.....   | 1    | 1 | seq |
| .....uaggccauggaaguuuagggcaUu.....  | 1    | 1 | seq |
| .....uaggccauggaaguuuAaggcaau.....  | 2    | 1 | seq |
| .....uaggccauggaaguuuGggcaau.....   | 1    | 1 | seq |
| .....Gaggccauggaaguuuagggcaau.....  | 1    | 1 | seq |
| .....uagCccauggaaguuuagggcaau.....  | 1    | 1 | seq |
| .....uaggccauggaagCuugaggcaau.....  | 10   | 1 | seq |
| .....uaggccauggaaguuuagggcaau.....  | 1758 | 0 | seq |
| .....uaggccauggaaguuuagggcaGu.....  | 4    | 1 | seq |
| .....uaggccauggaaguuuagggcGau.....  | 6    | 1 | seq |
| .....uaggccauggaaguGugaggcaau.....  | 1    | 1 | seq |
| .....uaggccauggUaguuuagggcaau.....  | 1    | 1 | seq |
| .....uaggccauggaaguuuagggcaaA.....  | 4    | 1 | seq |
| .....uaggccauggaaguCugaggcaau.....  | 1    | 1 | seq |
| .....uaggccauggGaguuuagggcaau.....  | 6    | 1 | seq |
| .....uaggccauggaaguuuagggcaaG.....  | 27   | 1 | seq |
| .....Caggccauggaaguuuagggcaau.....  | 4    | 1 | seq |
| .....uaggcUauggaaguuuagggcaau.....  | 4    | 1 | seq |
| .....uaggccauggaaguuuagggcaaCg..... | 1    | 1 | seq |

Star

uaaaaagacuauggucauuu**aggccaugga**aguug**aggca**u**ggcaaa**uaucuaa**ugugcu**uaa**augu**ucaaaaauugcacaagcacuacacuaa**ugcaguga**acgaguuuuuc

|                                        |      |   |     |
|----------------------------------------|------|---|-----|
| .....uaggccauggaaguuugaggcaauU.....    | 4    | 1 | seq |
| .....uaggccauggaaguuugaggcaauG.....    | 3    | 0 | seq |
| .....uaggccauggaaguuugaggcaaaAg.....   | 1    | 1 | seq |
| .....uaggccauggaaguuugaggcaauAGc.....  | 1    | 1 | seq |
| .....uaggccauggaaguuugaggcaauGAc.....  | 2    | 1 | seq |
| .....uaggccauggaaguuugaggcaauAGca..... | 3    | 1 | seq |
| .....uaggccauggaaguuugaggcaauGAcA..... | 4    | 1 | seq |
| .....aggccauggaaguuuAa.....            | 2    | 1 | seq |
| .....aggccauggCaguuuga.....            | 1    | 1 | seq |
| .....aggccauggaaguuCuga.....           | 12   | 1 | seq |
| .....aggccauggaaguuuCa.....            | 1    | 1 | seq |
| .....Cggccauggaaguuuga.....            | 1    | 1 | seq |
| .....aCgccauggaaguuuga.....            | 1    | 1 | seq |
| .....Nggccauggaaguuuga.....            | 4    | 1 | seq |
| .....agUccauggaaguuuga.....            | 1    | 1 | seq |
| .....aggccCuggaaguuuga.....            | 1    | 1 | seq |
| .....aggccauggaagAuuga.....            | 1    | 1 | seq |
| .....aggcGauggaaguuuga.....            | 1    | 1 | seq |
| .....aggccauggaagGuuga.....            | 4    | 1 | seq |
| .....aggccauggaaguuCga.....            | 5    | 1 | seq |
| .....aggccUuggaaguuuga.....            | 2    | 1 | seq |
| .....aggccauggaaguuuga.....            | 2992 | 0 | seq |
| .....aggccauggaGguuuuga.....           | 10   | 1 | seq |
| .....aggccauggUaguuuuga.....           | 1    | 1 | seq |
| .....aggccaGggaaguuuga.....            | 1    | 1 | seq |
| .....aggccaugAaaguuuga.....            | 2    | 1 | seq |
| .....aggccauggaaguuAuga.....           | 1    | 1 | seq |
| .....aggccauggaaguuGga.....            | 3    | 1 | seq |
| .....aggccauggaUguuuuga.....           | 1    | 1 | seq |
| .....aggccaCggaaguuuga.....            | 2    | 1 | seq |
| .....aggccauggGaguuuugag.....          | 2    | 1 | seq |
| .....aggcUauggaaguuugag.....           | 2    | 1 | seq |
| .....Uggccauggaaguuugag.....           | 1    | 1 | seq |
| .....aggccauggUaguuuugag.....          | 2    | 1 | seq |
| .....aggccauggaaguuuAag.....           | 1    | 1 | seq |
| .....Nggccauggaaguuugag.....           | 3    | 1 | seq |
| .....aggccauggaaguuugaU.....           | 2    | 1 | seq |
| .....aggccauggaGguuuugag.....          | 3    | 1 | seq |
| .....aggccauggaaguuCugag.....          | 1    | 1 | seq |
| .....aggccUuggaaguuugag.....           | 3    | 1 | seq |
| .....aggccauggaaguuuCag.....           | 3    | 1 | seq |
| .....aggccaugUaaguuugag.....           | 1    | 1 | seq |
| .....aggccauggaaguuugag.....           | 1308 | 0 | seq |
| .....aggccaCggaaguuugag.....           | 1    | 1 | seq |
| .....aggcGauggaaguuugag.....           | 1    | 1 | seq |
| .....aggccauggaaguuCgag.....           | 2    | 1 | seq |
| .....aggccaAggaaguuugagg.....          | 1    | 1 | seq |
| .....aggccauggaaguuugagC.....          | 35   | 1 | seq |
| .....aggccauggaaguuugaUg.....          | 3    | 1 | seq |
| .....aggccauggaaguuugagg.....          | 4154 | 0 | seq |
| .....Uggccauggaaguuugagg.....          | 3    | 1 | seq |
| .....aggccauggaaguuGgagg.....          | 3    | 1 | seq |
| .....aggccauggaaguuugagA.....          | 241  | 1 | seq |
| .....aggcUauggaaguuugagg.....          | 5    | 1 | seq |
| .....aggcGauggaaguuugagg.....          | 1    | 1 | seq |
| .....aggccauggGaguuuugagg.....         | 17   | 1 | seq |
| .....aggccaCggaaguuugagg.....          | 7    | 1 | seq |
| .....agUccauggaaguuugagg.....          | 1    | 1 | seq |
| .....aggccauggaaguuuUagg.....          | 1    | 1 | seq |
| .....Nggccauggaaguuugagg.....          | 5    | 1 | seq |
| .....aggccauggaaguuugaCg.....          | 5    | 1 | seq |
| .....aggccauggaUguuuugagg.....         | 1    | 1 | seq |
| .....aggccauggaagGuugagg.....          | 1    | 1 | seq |
| .....aggccauggaaguuuGcg.....           | 2    | 1 | seq |
| .....Cggccauggaaguuugagg.....          | 3    | 1 | seq |
| .....aggccauggaaguuCugagg.....         | 1    | 1 | seq |
| .....aggccauggaaguuAagagg.....         | 2    | 1 | seq |
| .....aggccUuggaaguuugagg.....          | 1    | 1 | seq |
| .....aggccaugAaaguuugagg.....          | 2    | 1 | seq |
| .....aggccauggUaguuuugagg.....         | 2    | 1 | seq |

# Mature Star

|                                                                                                                   |      |   |     |
|-------------------------------------------------------------------------------------------------------------------|------|---|-----|
| uaaaaagacuauggucauuuaggccauggaaguuuaggccauggcaaaauaucuaaugugcuuuaaauuucaaaaauugcacaaagcacuaaagcagugaaacgaguuuuuuc |      |   |     |
| .Gggccauggaaguuuaggg.                                                                                             | 14   | 1 | seq |
| .aggccauggaaguuCgagg.                                                                                             | 5    | 1 | seq |
| .aggccauggaGguuuaggg.                                                                                             | 9    | 1 | seq |
| .aggccauggaaguuCugaggc.                                                                                           | 5    | 1 | seq |
| .aggccaagggaaguuuagggc.                                                                                           | 1    | 1 | seq |
| .Uggccauggaaguuuagggc.                                                                                            | 3    | 1 | seq |
| .aggccCuggaaguuuagggc.                                                                                            | 1    | 1 | seq |
| .aggccauggaaguuugaCgc.                                                                                            | 2    | 1 | seq |
| .aggccaCggaaguuuagggc.                                                                                            | 8    | 1 | seq |
| .aggccauggaaguuuagggc.                                                                                            | 6437 | 0 | seq |
| .aggccauggaaguuuUaggc.                                                                                            | 3    | 1 | seq |
| .aggCcauggaaguuuagggc.                                                                                            | 1    | 1 | seq |
| .aggccUuggaaguuuagggc.                                                                                            | 2    | 1 | seq |
| .Gggccauggaaguuuagggc.                                                                                            | 29   | 1 | seq |
| .agCccauggaaguuuagggc.                                                                                            | 1    | 1 | seq |
| .aggccauggaGguuuagggc.                                                                                            | 24   | 1 | seq |
| .aggccauggaUguuuagggc.                                                                                            | 6    | 1 | seq |
| .aggccauggaaguuCugaggc.                                                                                           | 2    | 1 | seq |
| .aggccauggaagCuugaggc.                                                                                            | 17   | 1 | seq |
| .Nggccauggaaguuuagggc.                                                                                            | 7    | 1 | seq |
| .aggccauggaaguuuaggCc.                                                                                            | 19   | 1 | seq |
| .aggccauggaaguuuaggAc.                                                                                            | 16   | 1 | seq |
| .Cggccauggaaguuuagggc.                                                                                            | 5    | 1 | seq |
| .aggccauggaaguuCgaggc.                                                                                            | 10   | 1 | seq |
| .aggccauggaaguuAgaggc.                                                                                            | 1    | 1 | seq |
| .aggccauggaagGuuagggc.                                                                                            | 2    | 1 | seq |
| .aggccauggaaguuuCaggc.                                                                                            | 1    | 1 | seq |
| .aggccauCgaaguuuagggc.                                                                                            | 2    | 1 | seq |
| .aggccauggaaguuAgaggc.                                                                                            | 2    | 1 | seq |
| .aggccaGggaaguuuagggc.                                                                                            | 1    | 1 | seq |
| .aggccauggGaguuuagggc.                                                                                            | 27   | 1 | seq |
| .aggccaugAaaguuuagggc.                                                                                            | 2    | 1 | seq |
| .aggccauggaCguuuagggc.                                                                                            | 2    | 1 | seq |
| .aggccauggaagAuagggc.                                                                                             | 5    | 1 | seq |
| .aggccaugCaaguuuagggc.                                                                                            | 1    | 1 | seq |
| .aggccauggaaguuuAgggc.                                                                                            | 1    | 1 | seq |
| .aggcUauggaaguuuagggc.                                                                                            | 6    | 1 | seq |
| .aggccauggCaguuuagggc.                                                                                            | 1    | 1 | seq |
| .aggccauggaaguuuaggUc.                                                                                            | 1    | 1 | seq |
| .agCccauggaaguuuagggca.                                                                                           | 1    | 1 | seq |
| .aggccauggaaguuuAgggca.                                                                                           | 4    | 1 | seq |
| .aggccauggaaguuuaggCgca.                                                                                          | 1    | 1 | seq |
| .Gggccauggaaguuuagggca.                                                                                           | 91   | 1 | seq |
| .aggccauCgaaguuuagggca.                                                                                           | 1    | 1 | seq |
| .aggccauggaaCuuuagggca.                                                                                           | 1    | 1 | seq |
| .aggccauggaaguuAgaggca.                                                                                           | 6    | 1 | seq |
| .aggccauggCaguuuagggca.                                                                                           | 2    | 1 | seq |
| .aggccauggaaguuuaggUgca.                                                                                          | 16   | 1 | seq |
| .aggccauggaaguuuaggAc.                                                                                            | 35   | 1 | seq |
| .aggccauggaaguuuaggGca.                                                                                           | 14   | 1 | seq |
| .aggccaugCaaguuuagggca.                                                                                           | 2    | 1 | seq |
| .aggccauggaaguuGugaggca.                                                                                          | 3    | 1 | seq |
| .Uggccauggaaguuuagggca.                                                                                           | 22   | 1 | seq |
| .aggccauggaaguuuagggcC.                                                                                           | 64   | 1 | seq |
| .aggccauUgaaguuuagggca.                                                                                           | 1    | 1 | seq |
| .aggccUuggaaguuuagggca.                                                                                           | 5    | 1 | seq |
| .aggccauggaaguuGgaggca.                                                                                           | 3    | 1 | seq |
| .aggccauggaaguuCgaggca.                                                                                           | 36   | 1 | seq |
| .aggccauggaUguuuagggca.                                                                                           | 5    | 1 | seq |
| .aggccauggaagCuugaggca.                                                                                           | 30   | 1 | seq |
| .aggccauggaaguuugaUgca.                                                                                           | 4    | 1 | seq |
| .aggccaCggaaguuuagggca.                                                                                           | 29   | 1 | seq |
| .aggccauggaagAuagggca.                                                                                            | 8    | 1 | seq |
| .aggccauggaaguuuaggUca.                                                                                           | 3    | 1 | seq |
| .aggccauggaaguuuagggcG.                                                                                           | 660  | 1 | seq |
| .aggccauggaaguuuUaggca.                                                                                           | 2    | 1 | seq |
| .aggccauggaGguuuagggca.                                                                                           | 66   | 1 | seq |
| .aggccauggGaguuuagggca.                                                                                           | 61   | 1 | seq |
| .aggcUauggaaguuuagggca.                                                                                           | 18   | 1 | seq |
| .aggccGuggaaguuuagggca.                                                                                           | 47   | 1 | seq |



Star

uaaaaagacuauggucauuu**aggccauggaaguugaggca**u**ggcaaa**uau**cuaa**u**gugcuuaa**auguucaaaauugcacaagcacuacacuaa**ugcagugaacgaguuuuuc**

|                               |       |   |     |
|-------------------------------|-------|---|-----|
| .aggcGauggaaguuugaggca.....   | 3     | 1 | seq |
| .aggccauggaagGuugaggca.....   | 10    | 1 | seq |
| .aggccauggaaguuugaggca.....   | 16406 | 0 | seq |
| .aggccaugggUaguuuaggca.....   | 8     | 1 | seq |
| .aggccauggaagUAgaggca.....    | 1     | 1 | seq |
| .aggccaugUaaguuugaggca.....   | 1     | 1 | seq |
| .agUccauggaaguuugaggca.....   | 4     | 1 | seq |
| .Nggccauggaaguuugaggca.....   | 14    | 1 | seq |
| .aggccaugAaaguuugaggca.....   | 6     | 1 | seq |
| .aggccauggaCguuugaggca.....   | 3     | 1 | seq |
| .aggccauggaaguuugagCca.....   | 50    | 1 | seq |
| .aggccauggaaguuugaCgca.....   | 4     | 1 | seq |
| .Cggccauggaaguuugaggca.....   | 8     | 1 | seq |
| .aggccauggaagUCugaggca.....   | 34    | 1 | seq |
| .aggccauggaaguuugaAgca.....   | 6     | 1 | seq |
| .aggccCuggaaguuugaggca.....   | 3     | 1 | seq |
| .aggccaAggaaguuugaggca.....   | 2     | 1 | seq |
| .aCgccauggaaguuugaggca.....   | 1     | 1 | seq |
| .aggccauggaaguuugagCcaa.....  | 1     | 1 | seq |
| .aggccauggaaguuugaggcaU.....  | 21    | 1 | seq |
| .aggccGuggaaguuugaggcaa.....  | 5     | 1 | seq |
| .aggccaugggGaguuuaggcaa.....  | 8     | 1 | seq |
| .agUccauggaaguuugaggcaa.....  | 1     | 1 | seq |
| .aggccauggaaguuugaggcaC.....  | 5     | 1 | seq |
| .Nggccauggaaguuugaggcaa.....  | 4     | 1 | seq |
| .aggccauggaUGuuuugaggcaa..... | 3     | 1 | seq |
| .aggccauUGaaguuugaggcaa.....  | 1     | 1 | seq |
| .aggccauggaaguuugagAcaa.....  | 1     | 1 | seq |
| .Gggccauggaaguuugaggcaa.....  | 11    | 1 | seq |
| .aggccauggaGguuuugaggcaa..... | 10    | 1 | seq |
| .Cggccauggaaguuugaggcaa.....  | 3     | 1 | seq |
| .aggccauggaaguuugaggcaa.....  | 2067  | 0 | seq |
| .aggccauggaagCUugaggcaa.....  | 10    | 1 | seq |
| .aggccCuggaaguuugaggcaa.....  | 1     | 1 | seq |
| .aggccauggaagUCugaggcaa.....  | 8     | 1 | seq |
| .aggccauggaaguuugaggcaG.....  | 44    | 1 | seq |
| .aggccauggaaguuugaggcCa.....  | 2     | 1 | seq |
| .aggccUuggaaguuugaggcaa.....  | 2     | 1 | seq |
| .aggccauggaaguuugaUGcaa.....  | 1     | 1 | seq |
| .aggccaugUaaguuugaggcaa.....  | 1     | 1 | seq |
| .aggccauggaaguuugaggcGa.....  | 10    | 1 | seq |
| .aggccauggaaCuugaggcaa.....   | 1     | 1 | seq |
| .aggcUauggaaguuugaggcaa.....  | 5     | 1 | seq |
| .Uggccauggaaguuugaggcaa.....  | 3     | 1 | seq |
| .aggccauggaaguuugaggcUa.....  | 2     | 1 | seq |
| .aggccaCggaaguuugaggcaa.....  | 2     | 1 | seq |
| .aggccauggaaguuCgaggcaa.....  | 3     | 1 | seq |
| .aggccaugCaaguuugaggcaa.....  | 1     | 1 | seq |
| .aggccaAggaaguuugaggcaau..... | 1     | 1 | seq |
| .aggccauggaaguuugagAcaau..... | 2     | 1 | seq |
| .aggccauggaaguuGgaggcaau..... | 1     | 1 | seq |
| .aggccauggUaguugaggcaau.....  | 1     | 1 | seq |
| .aggccauggaUGuuugaggcaau..... | 1     | 1 | seq |
| .aggccauggaaguuugaggcaaG..... | 24    | 1 | seq |
| .aggccauggGaguugaggcaau.....  | 10    | 1 | seq |
| .aggccauggaaguuugagUcaau..... | 1     | 1 | seq |
| .aggccauggaaguuugaAgcaau..... | 2     | 1 | seq |
| .Uggccauggaaguuugaggcaau..... | 6     | 1 | seq |
| .aggccauggaCguuugaggcaau..... | 1     | 1 | seq |
| .aggccauggaaguuCgaggcaau..... | 2     | 1 | seq |
| .aggccauggaaguuugaggcaaA..... | 6     | 1 | seq |
| .aggccauggaaguuugaggcaGu..... | 8     | 1 | seq |
| .aggccauggaaguuugaggcaaC..... | 237   | 1 | seq |
| .Cggccauggaaguuugaggcaau..... | 1     | 1 | seq |
| .aggccauggaagCUugaggcaau..... | 3     | 1 | seq |
| .Nggccauggaaguuugaggcaau..... | 2     | 1 | seq |
| .aggccauggaaguuugaggcGau..... | 4     | 1 | seq |
| .agCccauggaaguuugaggcaau..... | 1     | 1 | seq |
| .Gggccauggaaguuugaggcaau..... | 10    | 1 | seq |
| .aggGcauggaaguuugaggcaau..... | 1     | 1 | seq |

## Star

uaaaaagacuauggucauuu**aggccauggaaguugaggca**uggcaaaaucuaaaugugcuuaaauguucaaaauugcacaagcacuacacuaaugcagugaacgaguuuuuc

|                               |      |   |     |
|-------------------------------|------|---|-----|
| aggcccauggaaguuugaUgcaau.     | 2    | 1 | seq |
| aggcccauggaagGuugaggcaau.     | 1    | 1 | seq |
| aggcccauggaaguuugaggcaUu.     | 2    | 1 | seq |
| aggcccauggaaguuugUggcaau.     | 2    | 1 | seq |
| aggcccauggaaguuugaggNaau.     | 1    | 1 | seq |
| aggcccauggaaguCugaggcaau.     | 1    | 1 | seq |
| aggcUauggaaguuugaggcaau.      | 5    | 1 | seq |
| aggcccauggaaguuugaggcUau.     | 2    | 1 | seq |
| aggccaCggaaguuugaggcaau.      | 1    | 1 | seq |
| aggcccauggaaguuugaggcaau.     | 2096 | 0 | seq |
| aggcccauggaGguuugaggcaau.     | 6    | 1 | seq |
| aggccGuggaaguuugaggcaau.      | 4    | 1 | seq |
| aggcccauggaaguuugaggcaaGg.    | 2    | 1 | seq |
| aggcccauggaaguuugaggcaauU.    | 4    | 1 | seq |
| aggcccauggaaguuugaggcaaAg.    | 1    | 1 | seq |
| aggcccauggaaguuugaggcaauG.    | 14   | 0 | seq |
| aggcccauggaaguuCgaggcaauG.    | 1    | 1 | seq |
| aggcccauggaaguuugaggcaauUg.   | 1    | 1 | seq |
| aggcccauggaaguuugaggcaauAg.   | 4    | 1 | seq |
| aggcccauggaaguuugaggcaauGc.   | 1    | 1 | seq |
| aggcccauggaaguuugaggcaauAgc.  | 1    | 1 | seq |
| aggcccauggaaguuugaggcaauAgca. | 2    | 1 | seq |
| ggGcauggaaguuugag.            | 2    | 1 | seq |
| ggccauggaaguuugag.            | 418  | 0 | seq |
| ggccauggaUguuugag.            | 1    | 1 | seq |
| ggccauggaGguuugag.            | 3    | 1 | seq |
| ggccauggaaguuugaC.            | 1    | 1 | seq |
| ggccauggGaguugag.             | 1    | 1 | seq |
| ggccauggaagGuugag.            | 2    | 1 | seq |
| ggccaAggaaguuugag.            | 1    | 1 | seq |
| ggccauggaaguuUag.             | 1    | 1 | seq |
| ggccauggUaguugag.             | 1    | 1 | seq |
| Cgccauggaaguuugagg.           | 1    | 1 | seq |
| ggccauggaaguuCgagg.           | 2    | 1 | seq |
| ggccauggaaguuugaUg.           | 1    | 1 | seq |
| ggccauggaaguuGgagg.           | 1    | 1 | seq |
| ggccauggaaguuugagC.           | 3    | 1 | seq |
| ggccauggaaguuugagg.           | 1223 | 0 | seq |
| ggccaugAaaguuugagg.           | 1    | 1 | seq |
| Ngccauggaaguuugagg.           | 1    | 1 | seq |
| ggccaAggaaguuugagg.           | 1    | 1 | seq |
| ggccaCggaaguuugagg.           | 4    | 1 | seq |
| ggccauggaagGuugagg.           | 1    | 1 | seq |
| ggccauggaagGuugagg.           | 1    | 1 | seq |
| gUccauggaaguuugagg.           | 1    | 1 | seq |
| ggccauggaaguCugagg.           | 3    | 1 | seq |
| ggccauggaGguuugagg.           | 5    | 1 | seq |
| ggccauggGaguugagg.            | 5    | 1 | seq |
| ggccauggaagGuugaggc.          | 1    | 1 | seq |
| ggccaCggaaguuugaggc.          | 3    | 1 | seq |
| ggccauggaaguuugagAc.          | 2    | 1 | seq |
| ggccauggaaguuGgaggc.          | 1    | 1 | seq |
| ggccauggaaguCugaggc.          | 3    | 1 | seq |
| ggccauggaUguuugaggc.          | 3    | 1 | seq |
| ggccauggaaguuugaggc.          | 1023 | 0 | seq |
| ggccauggaaguuAgaggc.          | 1    | 1 | seq |
| ggccauggaGguuugaggc.          | 4    | 1 | seq |
| ggGcauggaaguuugaggc.          | 1    | 1 | seq |
| Ngccauggaaguuugaggc.          | 1    | 1 | seq |
| ggccauggaagAuugaggc.          | 2    | 1 | seq |
| gUccauggaaguuugaggc.          | 1    | 1 | seq |
| ggccauggaaguuugagCc.          | 5    | 1 | seq |
| ggccauggaaguuCgaggc.          | 2    | 1 | seq |
| ggccaugAaaguuugaggc.          | 3    | 1 | seq |
| ggccaAggaaguuugaggc.          | 1    | 1 | seq |
| ggccauggGaguugaggc.           | 7    | 1 | seq |
| ggccauggaaguuugCggc.          | 1    | 1 | seq |
| ggccauggaaguuugagCca.         | 11   | 1 | seq |
| ggccauggaaguuugaggcG.         | 64   | 1 | seq |
| ggccauggaaguuAgaggca.         | 2    | 1 | seq |

Star

uaaaaagacuauggucauuu**aggccauggaaguugaggca**u**ggcaaa**uaucuaa**ugugcuuaa**auguucaaaauugcacaagcacuacacuaa**ugcagugaacgaguuuuuc**

|                             |      |   |     |
|-----------------------------|------|---|-----|
| ggGcaugggaaguuugaggca       | 2    | 1 | seq |
| ggccaugggaagGuugaggca       | 1    | 1 | seq |
| ggccaugggaaguAugaggca       | 2    | 1 | seq |
| ggccauggGaguuuugaggca       | 8    | 1 | seq |
| ggccaugggaaguuugagAca       | 1    | 1 | seq |
| ggccaugggaaguCugaggca       | 1    | 1 | seq |
| ggccaugggaaguuugUggca       | 1    | 1 | seq |
| gUccaugggaaguuugaggca       | 4    | 1 | seq |
| ggccaugggaaguuCgaggca       | 1    | 1 | seq |
| ggccaugggaaguuugaggca       | 1710 | 0 | seq |
| ggccaCggaaguuugaggca        | 1    | 1 | seq |
| ggccaugggaaguuugaggGa       | 1    | 1 | seq |
| ggccaugAaaguuugaggca        | 1    | 1 | seq |
| ggcUaugggaaguuugaggca       | 2    | 1 | seq |
| ggccaugggaaguuugCggca       | 1    | 1 | seq |
| ggccaugggaaguuugaggcC       | 1    | 1 | seq |
| Ngccaugggaaguuugaggca       | 1    | 1 | seq |
| ggccGuggaaguuugaggca        | 5    | 1 | seq |
| ggccaugggaagCuugaggca       | 3    | 1 | seq |
| ggccaugggaaguuugaAgca       | 1    | 1 | seq |
| ggccaugggaGguuuugaggca      | 3    | 1 | seq |
| Ngccaugggaaguuugaggcaa      | 1    | 1 | seq |
| ggccaugggaaguuugagCcaa      | 1    | 1 | seq |
| ggccaugAaaguuugaggcaa       | 1    | 1 | seq |
| ggccaugggaaguuugaggcGa      | 2    | 1 | seq |
| ggccGuggaaguuugaggcaa       | 1    | 1 | seq |
| ggccaugggaaguuugagAcaa      | 1    | 1 | seq |
| ggccaugggaaguuugaggcaa      | 286  | 0 | seq |
| ggGcaugggaaguuugaggcaa      | 1    | 1 | seq |
| ggccaugggaaguuugaggcaU      | 4    | 1 | seq |
| ggccauggUaguuuugaggcaa      | 1    | 1 | seq |
| ggccaugggaaguuugUggcaa      | 1    | 1 | seq |
| ggccauggGaguuuugaggcaa      | 1    | 1 | seq |
| ggccaugggaaguuugaggcaG      | 8    | 1 | seq |
| ggccaugggaGguuuugaggcaa     | 1    | 1 | seq |
| ggccaugggaaguuugaggcCa      | 1    | 1 | seq |
| ggccaugggaagCuugaggcaa      | 1    | 1 | seq |
| ggccUuggaaguuugaggcaa       | 1    | 1 | seq |
| ggccaugggaGguuuugaggcaau    | 1    | 1 | seq |
| ggccaugggaaguuCgaggcaau     | 1    | 1 | seq |
| ggccaugggaaguuugaggcaaC     | 40   | 1 | seq |
| Ngccaugggaaguuugaggcaau     | 1    | 1 | seq |
| ggccaugggaagCuugaggcaau     | 1    | 1 | seq |
| ggccaugggaaguuugaggcaau     | 350  | 0 | seq |
| ggccaCggaaguuugaggcaau      | 1    | 1 | seq |
| ggccaugggaaguuugaggcaaG     | 3    | 1 | seq |
| ggccaugggaaguuugaggcaGu     | 1    | 1 | seq |
| ggcUaugggaaguuugaggcaau     | 1    | 1 | seq |
| ggccaugggaaguuugaggcGau     | 1    | 1 | seq |
| ggccGuggaaguuugaggcaau      | 1    | 1 | seq |
| ggGcaugggaaguuugaggcaau     | 1    | 1 | seq |
| ggccaugggaaguCugaggcaau     | 1    | 1 | seq |
| ggccaugggaaguuugaUgcaau     | 1    | 1 | seq |
| ggccaugggaaguuugaggcaaA     | 1    | 1 | seq |
| ggccaugggaaguAugaggcaau     | 1    | 1 | seq |
| ggccauggGaguuuugaggcaau     | 2    | 1 | seq |
| ggccaugggaaguuugaggcaauU    | 1    | 1 | seq |
| ggccaugggaaguuugaggcaaugAc  | 2    | 1 | seq |
| ggccaugggaaguuugaggcaauAgc  | 3    | 1 | seq |
| ggccaugggaaguuugaggcaaugAca | 1    | 1 | seq |
| gccaugggaaguuugCgg          | 1    | 1 | seq |
| gccaugggaaguuugagg          | 479  | 0 | seq |
| gccaugggaagGuugagg          | 2    | 1 | seq |
| gccaugggaaguuCgagg          | 2    | 1 | seq |
| gGcaugggaaguuugagg          | 1    | 1 | seq |
| gccAAggaaguuugagg           | 1    | 1 | seq |
| gccaugggaCguuuugagg         | 1    | 1 | seq |
| gccaugggaaguuugagC          | 1    | 1 | seq |
| gccCaGgaaguuugagg           | 2    | 1 | seq |
| gccaugggaGguuuugagg         | 1    | 1 | seq |

## Star

uaaaaagacuauggucauuu**aggccaugga**guu**uaggcca**u**uggcaaa**uaucuaa**ugugcuuaa**auguucaaaauugcacaagcacuacacuaa**ugcagugaacgaguuuuuc**

|                          |      |   |     |
|--------------------------|------|---|-----|
| gccauggaUguuuagagg       | 2    | 1 | seq |
| gccauggGaguuugaggc       | 1    | 1 | seq |
| gGcAuggaaguuuagaggc      | 2    | 1 | seq |
| gccaugggaaguuuUaggc      | 1    | 1 | seq |
| gccaugggaaguuugagCc      | 1    | 1 | seq |
| gccaugggaaguuugaggc      | 94   | 0 | seq |
| gcUauggaaguuuagaggc      | 2    | 1 | seq |
| gccaugAaaguuuagaggca     | 1    | 1 | seq |
| gccaugggaaguCugaggca     | 2    | 1 | seq |
| gccaugggaagGuugaggca     | 1    | 1 | seq |
| gccGuggaaguuugaggca      | 2    | 1 | seq |
| gccaugggaaguuugagAca     | 1    | 1 | seq |
| gccaugggaUguuuagaggca    | 1    | 1 | seq |
| gcUauggaaguuuagaggca     | 4    | 1 | seq |
| gccUuggaaguuuugaggca     | 1    | 1 | seq |
| gccaugggaaguuuugaggca    | 437  | 0 | seq |
| Cccauggaaguuugaggca      | 1    | 1 | seq |
| Uccauggaaguuugaggca      | 1    | 1 | seq |
| gccauggGaguuuugaggca     | 3    | 1 | seq |
| gccaugggaaguuCgaggca     | 1    | 1 | seq |
| gccaugggaaguuuugaggcG    | 23   | 1 | seq |
| gccauggaGguuuugaggca     | 2    | 1 | seq |
| gcccaCggaaguuugaggca     | 3    | 1 | seq |
| Uccauggaaguuugaggcaa     | 1    | 1 | seq |
| gccaugggaaguuuugUggcaa   | 1    | 1 | seq |
| gccaugggaaguuuugaggcaa   | 42   | 0 | seq |
| gccaugggaaguuuugaggcGa   | 2    | 1 | seq |
| gccaugggaaguuuugaggcaU   | 1    | 1 | seq |
| gcUauggaaguuugaggcaa     | 1    | 1 | seq |
| gccaugggaaguuuugaggcaG   | 1    | 1 | seq |
| gccaugggaaguuuugaggcaau  | 33   | 0 | seq |
| gccaugggaaguuuugaggcaaaG | 1    | 1 | seq |
| Uccaugggaaguuuugaggcaau  | 1    | 1 | seq |
| Gcaugggaaguuuugaggc      | 3    | 1 | seq |
| ccaugAaaguuuugaggc       | 1    | 1 | seq |
| ccaCggaaguuuugaggc       | 3    | 1 | seq |
| ccauggaCguuuugaggc       | 1    | 1 | seq |
| ccaugggaagCuugaggc       | 1    | 1 | seq |
| ccaugggaaguCugaggc       | 2    | 1 | seq |
| ccaugggaaguuuugagCc      | 4    | 1 | seq |
| ccaAggaaguuuugaggc       | 1    | 1 | seq |
| ccauggUaguuuugaggc       | 1    | 1 | seq |
| ccaugggaaguuCgaggc       | 1    | 1 | seq |
| ccaugggaaguuuugaggc      | 1167 | 0 | seq |
| ccaugggaaguuuugCggc      | 2    | 1 | seq |
| ccaugggaaguuuugaCgc      | 2    | 1 | seq |
| ccaugggaaguGugaggc       | 1    | 1 | seq |
| ccauggGaguuuugaggc       | 3    | 1 | seq |
| ccaugggaaguuuugagUca     | 1    | 1 | seq |
| ccaugggaaguuuugaggcC     | 8    | 1 | seq |
| Gcaugggaaguuuugaggca     | 2    | 1 | seq |
| ccaCggaaguuuugaggca      | 2    | 1 | seq |
| ccGuggaaguuuugaggca      | 7    | 1 | seq |
| ccaugAaaguuuugaggca      | 2    | 1 | seq |
| ccauUgaaguuuugaggca      | 1    | 1 | seq |
| ccaugggaaguuCgaggca      | 6    | 1 | seq |
| ccaugggaaguuuugaggcG     | 123  | 1 | seq |
| ccaugggaaguuuugUggca     | 2    | 1 | seq |
| ccaugggaaguuuugagCca     | 4    | 1 | seq |
| ccauggUaguuuugaggca      | 1    | 1 | seq |
| ccaugggaaguuuugaAgca     | 3    | 1 | seq |
| ccaugggaaguuuugaggca     | 2767 | 0 | seq |
| ccaGggaaguuuugaggca      | 1    | 1 | seq |
| ccaugggaagCuugaggca      | 5    | 1 | seq |
| Ncauggaaguuuugaggca      | 6    | 1 | seq |
| ccaugggaUguuuugaggca     | 1    | 1 | seq |
| ccauggGaguuuugaggca      | 8    | 1 | seq |
| ccaugggaaguCugaggca      | 6    | 1 | seq |
| ccaugggaaguAagaggca      | 1    | 1 | seq |
| ccaAggaaguuuugaggca      | 2    | 1 | seq |

Star

UAAAAAAAAACUAAUCCUCAAUUUAGGCCAUAGGAUUUUAGAGGCAAUAGGCAAAUAUCUAAAUUAGCUAAAUAGUUUCAAUAUUAGCACAAGCACUAACACUAAUAGCAUUAAACGAGUUUUUAC

|                          |      |   |     |
|--------------------------|------|---|-----|
| ccUuggaaguuuagaggca      | 1    | 1 | seq |
| ccauggaaguuuAaggca       | 1    | 1 | seq |
| ccauggaaguuuagaggcGa     | 2    | 1 | seq |
| Gcauggaaguuuagaggcaa     | 1    | 1 | seq |
| ccauggGaguuuagaggcaa     | 1    | 1 | seq |
| ccauggaaguuuagaggcaC     | 1    | 1 | seq |
| ccauggaaguuuagaggcaG     | 10   | 1 | seq |
| ccauggaaguuuagaggcaa     | 355  | 0 | seq |
| ccaCggaaguuuagaggcaa     | 1    | 1 | seq |
| ccGuggaaguuuagaggcaa     | 1    | 1 | seq |
| ccauggaagGuuagaggcaa     | 1    | 1 | seq |
| ccauggaaguuCgaggcaau     | 1    | 1 | seq |
| ccauggaGguuagaggcaau     | 4    | 1 | seq |
| ccauggaaguuuagaggcaaA    | 2    | 1 | seq |
| ccGuggaaguuuagaggcaau    | 2    | 1 | seq |
| ccauggaaguCugaggcaau     | 3    | 1 | seq |
| ccauggaaguuuagaggcaaG    | 2    | 1 | seq |
| ccaCggaaguuuagaggcaau    | 1    | 1 | seq |
| ccauggaaguuuagaggcaaC    | 55   | 1 | seq |
| ccauggaaguuuagaggcGau    | 1    | 1 | seq |
| ccauggaCguuagaggcaau     | 1    | 1 | seq |
| ccauggaaguuuagaggcaau    | 417  | 0 | seq |
| ccauggaaguuuagaggcaaug   | 3    | 0 | seq |
| ccauggaaguuuagaggcaUug   | 2    | 1 | seq |
| ccauggaaguuuagaggcaaugU  | 1    | 1 | seq |
| ccauggaaguuuagaggcaaugAc | 1    | 1 | seq |
| cauggaaguuugCggca        | 1    | 1 | seq |
| cauggaaguuuagaggcG       | 63   | 1 | seq |
| Gauggaaguuuagaggca       | 1    | 1 | seq |
| cGuggaaguuuagaggca       | 5    | 1 | seq |
| cauggaagGuuagaggca       | 1    | 1 | seq |
| cauggaaguuCgaggca        | 1    | 1 | seq |
| cauggaaguuuugUggca       | 1    | 1 | seq |
| Nauggaaguuuagaggca       | 1    | 1 | seq |
| cauggaaguuuagCca         | 1    | 1 | seq |
| cauggaaguCugaggca        | 2    | 1 | seq |
| cauggaaguuAaggca         | 1    | 1 | seq |
| cauggGaguuuagaggca       | 4    | 1 | seq |
| caugUaaguuuagaggca       | 1    | 1 | seq |
| cauggaaguuuagaggcC       | 7    | 1 | seq |
| cauggaaguuugaAgca        | 1    | 1 | seq |
| cauggUaguuuagaggca       | 1    | 1 | seq |
| cauggaCguuugaggca        | 1    | 1 | seq |
| cauggaagCuugaggca        | 6    | 1 | seq |
| cCuggaaguuuagaggca       | 2    | 1 | seq |
| caCggaaguuuagaggca       | 7    | 1 | seq |
| cauggaaguuuagaggca       | 1556 | 0 | seq |
| cauggaaguuCgaggcaa       | 1    | 1 | seq |
| cauggaaguuuagaggcaU      | 1    | 1 | seq |
| cGuggaaguuuagaggcaa      | 1    | 1 | seq |
| caCggaaguuuagaggcaa      | 1    | 1 | seq |
| cauggaaguuuagaggcaG      | 6    | 1 | seq |
| cauggaagCuugaggcaa       | 1    | 1 | seq |
| cUuggaaguuuagaggcaa      | 1    | 1 | seq |
| cauggaaguuuagaggcaa      | 203  | 0 | seq |
| cauggaaguuugaAgcaau      | 1    | 1 | seq |
| cauggGaguuuagaggcaau     | 2    | 1 | seq |
| cGuggaaguuuagaggcaau     | 1    | 1 | seq |
| cauggaaguuAaggcaau       | 1    | 1 | seq |
| cauggaaguuuagaggcaau     | 254  | 0 | seq |
| cauggaaguuuagaggcaaA     | 1    | 1 | seq |
| cauggaaguuuagaggcaaC     | 29   | 1 | seq |
| cauggaagCuugaggcaau      | 1    | 1 | seq |
| cauggaaguuugaUgcaau      | 1    | 1 | seq |
| cauggaaguuuagaggcaUug    | 1    | 1 | seq |
| cauggaaguuuagaggcaaug    | 1    | 0 | seq |
| cauggaaguuuagaggcaaugAca | 2    | 1 | seq |
| auggaaguAuggaggcaa       | 1    | 1 | seq |
| auggaagCuugaggcaa        | 1    | 1 | seq |
| auggaaguuuagaggcGa       | 1    | 1 | seq |

# Mature Star

|                                                                                                                        |     |   |     |
|------------------------------------------------------------------------------------------------------------------------|-----|---|-----|
| uaaaaagacuauggucauuuagggccauggaaguuuagggcaaugggcaaaauaucuaaugugcuuaaauguuucaaaaaugcacaagcacuacacuaugcagugaaacgaguuuuuc |     |   |     |
| .....auggaaguuuagggcaU.....                                                                                            | 1   | 1 | seq |
| .....auggaaguuuagggcaG.....                                                                                            | 2   | 1 | seq |
| .....auggGaguuuagggcaa.....                                                                                            | 1   | 1 | seq |
| .....auggaaguuuagggcaa.....                                                                                            | 166 | 0 | seq |
| .....aAggaaguuuagggcaaau.....                                                                                          | 1   | 1 | seq |
| .....auggaaguuuagggcaaA.....                                                                                           | 1   | 1 | seq |
| .....auggaaguuuagggcaGu.....                                                                                           | 1   | 1 | seq |
| .....auggaaguuuCgaggcaaau.....                                                                                         | 2   | 1 | seq |
| .....auggaGguuuagggcaaau.....                                                                                          | 1   | 1 | seq |
| .....Guggaaguuuagggcaaau.....                                                                                          | 1   | 1 | seq |
| .....auggaaguuuagggcaaG.....                                                                                           | 1   | 1 | seq |
| .....auCgaaguuuagggcaaau.....                                                                                          | 1   | 1 | seq |
| .....auggaagCuugaggcaaau.....                                                                                          | 2   | 1 | seq |
| .....auggaaguuuagggcaaau.....                                                                                          | 292 | 0 | seq |
| .....auggaaguuuugaUgcaaau.....                                                                                         | 1   | 1 | seq |
| .....auggaaguuuagggcaaug.....                                                                                          | 2   | 0 | seq |
| .....uggaaguCugaggcaaau.....                                                                                           | 1   | 1 | seq |
| .....uggaGguuuagggcaaau.....                                                                                           | 4   | 1 | seq |
| .....uggaaguuuagaAgcaaau.....                                                                                          | 1   | 1 | seq |
| .....uggaagCuugaggcaaau.....                                                                                           | 3   | 1 | seq |
| .....Aggaaguuuagggcaaau.....                                                                                           | 1   | 1 | seq |
| .....uggaaguuuagggcaGu.....                                                                                            | 3   | 1 | seq |
| .....uggaaguuuCgaggcaaau.....                                                                                          | 2   | 1 | seq |
| .....uggaaguuuagggcaaA.....                                                                                            | 3   | 1 | seq |
| .....Cggaaguuuagggcaaau.....                                                                                           | 1   | 1 | seq |
| .....Gggaaguuuagggcaaau.....                                                                                           | 2   | 1 | seq |
| .....uggaaguuuagggcaaG.....                                                                                            | 8   | 1 | seq |
| .....uggGaguuuagggcaaau.....                                                                                           | 2   | 1 | seq |
| .....uggaaguuuagggcaaau.....                                                                                           | 724 | 0 | seq |
| .....Nggaaguuuagggcaaau.....                                                                                           | 3   | 1 | seq |
| .....uggaaguuuAgaggcaaau.....                                                                                          | 1   | 1 | seq |
| .....uggaaguuuUggcaaau.....                                                                                            | 1   | 1 | seq |
| .....uggaaguuuagggcaaauU.....                                                                                          | 1   | 1 | seq |
| .....uggaaguuuagggcaaug.....                                                                                           | 7   | 0 | seq |
| .....uggaaguuuagggcaaugAc.....                                                                                         | 3   | 1 | seq |
| .....uggaaguuuagggcaaugAca.....                                                                                        | 1   | 1 | seq |
| .....ggaaguuuagggcaaug.....                                                                                            | 1   | 0 | seq |
| .....gaaguuuagggcaaauUg.....                                                                                           | 1   | 1 | seq |
| .....uacacuaaugcaguCaacgaguuuu.....                                                                                    | 1   | 1 | seq |
| .....cuGaugcagugaaacgag.....                                                                                           | 1   | 1 | seq |
| .....cuGaugcagugaaacgagu.....                                                                                          | 2   | 1 | seq |
| .....cuaaugcaguCaacgaguu.....                                                                                          | 1   | 1 | seq |
| .....aaugcaguCaacgaguu.....                                                                                            | 1   | 1 | seq |

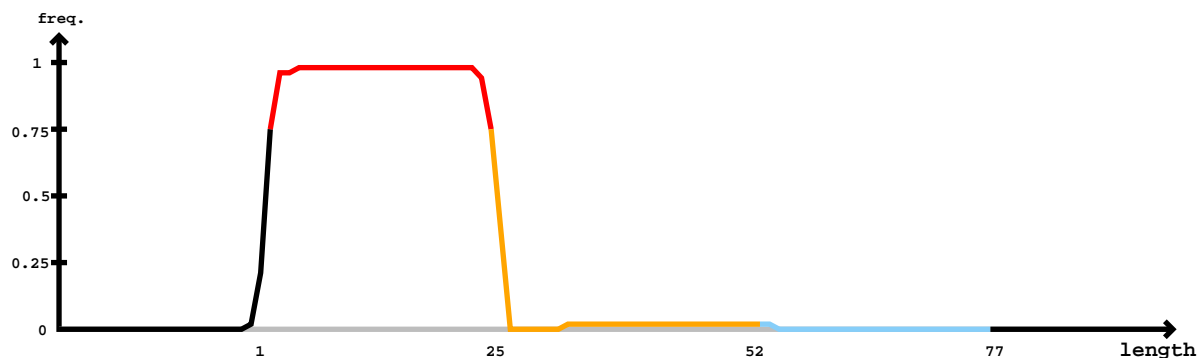

Star

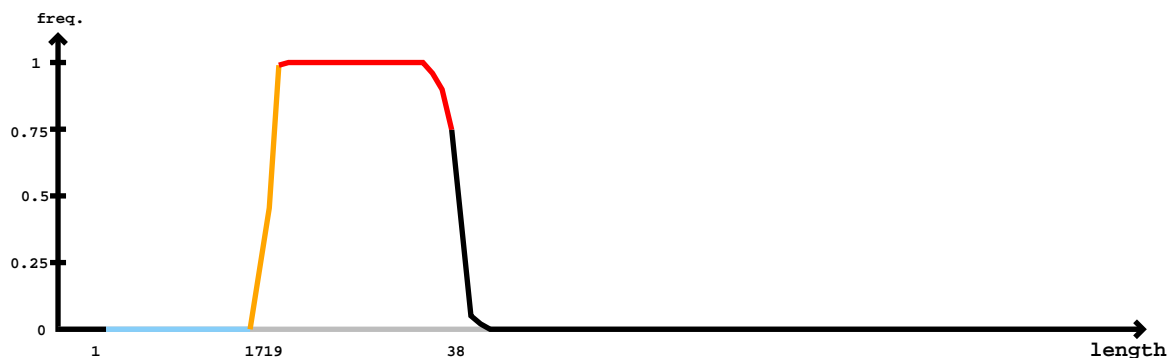

| 5' - gaaaggacauugcaugugauugacauuagggcgauauguuuuuauagaacauuucauuuacauagauuguaaaauagugcagcuagaaaaagccauucucugggaggaugggcaua | -3'   | exp |        |
|---------------------------------------------------------------------------------------------------------------------------|-------|-----|--------|
| .(((((((((((.(((...)))...)))...))))).(((((((.(((((((.....)))))).))))...)))...(((((((((((...))))))))))...)                 | reads | mm  | sample |
| .....acauuagggcgauauguC.....                                                                                              | 3     | 1   | seq    |
| .....acauuagggcgauauguu.....                                                                                              | 1     | 0   | seq    |
| .....acauuagggcgauauguuu.....                                                                                             | 2     | 0   | seq    |
| .....acauuagggcgauauguuA.....                                                                                             | 1     | 1   | seq    |
| .....acauuagggcgauauguuuu.....                                                                                            | 8     | 0   | seq    |
| .....acauuagggcgauauguuuAu.....                                                                                           | 1     | 1   | seq    |
| .....acauuagggcgauauguuuuu.....                                                                                           | 9     | 0   | seq    |
| .....acauuagggcgauauguuuuuG.....                                                                                          | 1     | 1   | seq    |
| .....acauuagggcGuauguuuuua.....                                                                                           | 1     | 1   | seq    |
| .....acauuagggcgauauguuuuua.....                                                                                          | 18    | 0   | seq    |
| .....cauuagggcgauauguuu.....                                                                                              | 2     | 0   | seq    |
| .....cauuagggcgauauguuuC.....                                                                                             | 1     | 1   | seq    |
| .....cauuagggcgauauguuuu.....                                                                                             | 5     | 0   | seq    |
| .....cauuagggcgauauguuuuu.....                                                                                            | 26    | 0   | seq    |
| .....cauuagggcgauauguuuuuG.....                                                                                           | 1     | 1   | seq    |
| .....cauuagggcgauauguuuuuA.....                                                                                           | 1     | 1   | seq    |
| .....cauuagggcGuauguuuuu.....                                                                                             | 1     | 1   | seq    |
| .....cauuagggcgauauguuuuua.....                                                                                           | 11    | 0   | seq    |
| .....cauuagggcgauauguuuuuCu.....                                                                                          | 3     | 1   | seq    |
| .....cauuagggcgauauguuuuuGu.....                                                                                          | 1     | 1   | seq    |
| .....cauuagggcgauauguuuuuTua.....                                                                                         | 1     | 1   | seq    |
| .....auuagggcgauauguuuG.....                                                                                              | 1     | 1   | seq    |



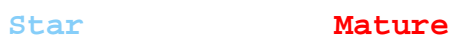[illegible]

# Star

# Mature

|                                                                                                                    |    |   |     |
|--------------------------------------------------------------------------------------------------------------------|----|---|-----|
| gaggaaugcucugaguuuccugaaaauguuacgaggauc <u>aauguggucu</u> uugccuugacaagcaaagaccuauuguguuggccuccuuuuaguuggguaccgaaa |    |   |     |
| .....cuauuguguuggccucc.....                                                                                        | 11 | 0 | seq |
| .....cuauCguguuggccucc.....                                                                                        | 1  | 1 | seq |
| .....cuauuguguuggccuUcu.....                                                                                       | 6  | 1 | seq |
| .....cuauuguguuggccuccG.....                                                                                       | 2  | 1 | seq |
| .....cuauuguguuggccuccA.....                                                                                       | 1  | 1 | seq |
| .....uauuguguuggccuUcu.....                                                                                        | 14 | 1 | seq |
| .....uauuguguuggccuccG.....                                                                                        | 4  | 1 | seq |

5' U G C C U G G C U C C C U G U A U G C C A C A U A C A G G C C A G U C A U A U  
3' A U A C G A A C C G A G G A C A C A U U U C G U G C G A U A C U U C C G U U A G U U G

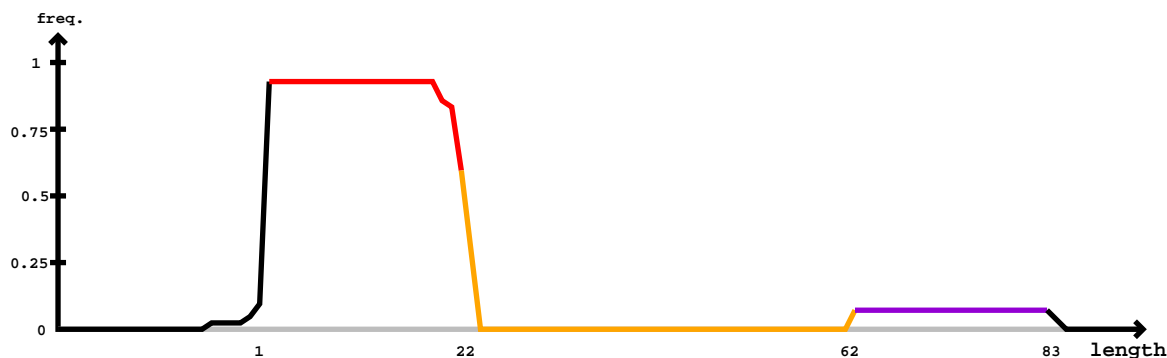

Star

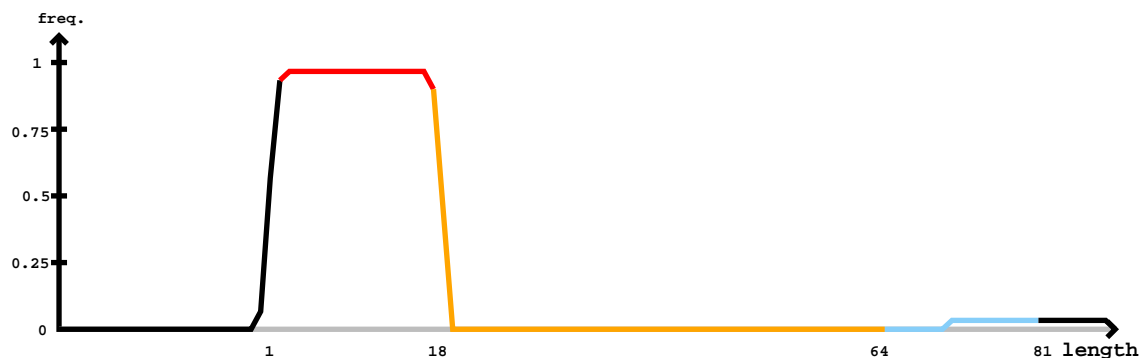

Star

[illegible]

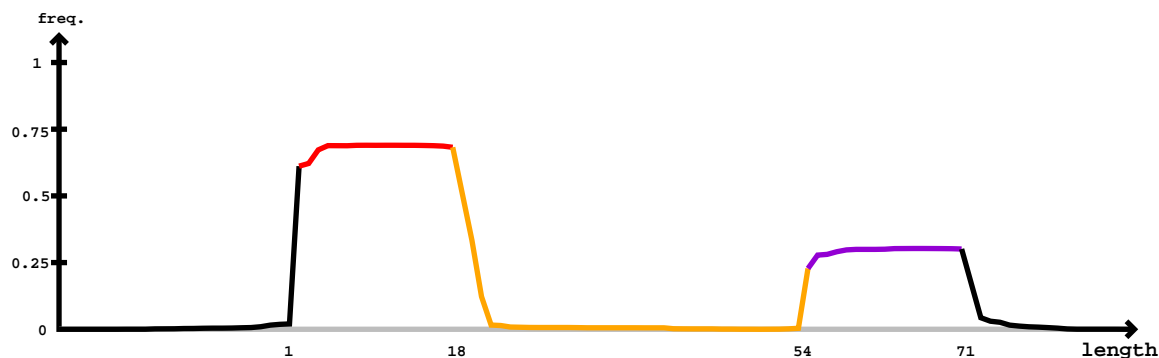

Star

[illegible]

## Mature

## Star

|                                  |                   |                                   |                                   |      |   |     |
|----------------------------------|-------------------|-----------------------------------|-----------------------------------|------|---|-----|
| ggaaaguuugggcccagcagcca          | cgguaaauccagcucca | aaauuguauuuuaaguuuguaguuaaaaaauuu | guaguuggaucuuggguuuaaaggucaguccac |      |   |     |
| .....gccUcgguaauuccagcucca.....  |                   |                                   |                                   | 4    | 1 | seq |
| .....gccUcgguaauuccagcuccaa..... |                   |                                   |                                   | 1    | 1 | seq |
| .....gccacgguaauuccagcuccaa..... |                   |                                   |                                   | 1    | 0 | seq |
| .....ccUcgguaauuccagcu.....      |                   |                                   |                                   | 1    | 1 | seq |
| .....ccacgguaauuccagcuA.....     |                   |                                   |                                   | 1    | 1 | seq |
| .....ccacgguaauuccagcuc.....     |                   |                                   |                                   | 2    | 0 | seq |
| .....ccUcgguaauuccagcucc.....    |                   |                                   |                                   | 2    | 1 | seq |
| .....ccacgguaauuccagcucc.....    |                   |                                   |                                   | 3    | 0 | seq |
| .....ccacgguaauuccagcucU.....    |                   |                                   |                                   | 1    | 1 | seq |
| .....ccCcguaauuccagcucc.....     |                   |                                   |                                   | 1    | 1 | seq |
| .....ccUcgguaauuccagcucca.....   |                   |                                   |                                   | 1    | 1 | seq |
| .....ccacgguaauuccagcucca.....   |                   |                                   |                                   | 7    | 0 | seq |
| .....ccCcguaauuccagcucca.....    |                   |                                   |                                   | 2    | 1 | seq |
| .....ccaAgguaauuccagcuccaa.....  |                   |                                   |                                   | 1    | 1 | seq |
| .....ccacgguaauuccagcuccaa.....  |                   |                                   |                                   | 1    | 0 | seq |
| .....ccCcguaauuccagcuccaa.....   |                   |                                   |                                   | 1    | 1 | seq |
| .....ccUcgguaauuccagcuccaa.....  |                   |                                   |                                   | 1    | 1 | seq |
| .....ccUcgguaauuccagcuccaa.....  |                   |                                   |                                   | 1    | 1 | seq |
| .....ccGcguaauuccagcuccaa.....   |                   |                                   |                                   | 3    | 1 | seq |
| .....ccGcguaauuccagcuccaa.....   |                   |                                   |                                   | 1    | 1 | seq |
| .....cUcgguaauuccagcucc.....     |                   |                                   |                                   | 1    | 1 | seq |
| .....cacgguauuccagcucc.....      |                   |                                   |                                   | 1    | 0 | seq |
| .....cacgguauuccagcucU.....      |                   |                                   |                                   | 1    | 1 | seq |
| .....cacgguauuccagcucA.....      |                   |                                   |                                   | 1    | 1 | seq |
| .....cacgguauuccagcucca.....     |                   |                                   |                                   | 1    | 1 | seq |
| .....cCcguaauuccagcucca.....     |                   |                                   |                                   | 1    | 1 | seq |
| .....cUcgguaauuccagcucca.....    |                   |                                   |                                   | 2    | 1 | seq |
| .....cUcgguaauuccagcuccaa.....   |                   |                                   |                                   | 1    | 1 | seq |
| .....cacgguauuccagcuccaa.....    |                   |                                   |                                   | 1    | 0 | seq |
| .....cacgguauuccagcuccaa.....    |                   |                                   |                                   | 1    | 0 | seq |
| .....cGcguaauuccagcuccaa.....    |                   |                                   |                                   | 4    | 1 | seq |
| .....acgguauuccagcucca.....      |                   |                                   |                                   | 1    | 0 | seq |
| .....acgguauuccagcuccC.....      |                   |                                   |                                   | 1    | 1 | seq |
| .....Ucgguaauuccagcucca.....     |                   |                                   |                                   | 1    | 1 | seq |
| .....Ccguaauuccagcucca.....      |                   |                                   |                                   | 1    | 1 | seq |
| .....Ucgguaauuccagcuccaa.....    |                   |                                   |                                   | 1    | 1 | seq |
| .....acgguauuccagcuccaa.....     |                   |                                   |                                   | 1    | 0 | seq |
| .....Ncguaauuccagcuccaa.....     |                   |                                   |                                   | 1    | 1 | seq |
| .....acgguauuccagcuccaa.....     |                   |                                   |                                   | 1    | 1 | seq |
| .....Agguaauuccagcucca.....      |                   |                                   |                                   | 3    | 1 | seq |
| .....cgguauuccagcCcca.....       |                   |                                   |                                   | 2    | 1 | seq |
| .....cgguauuccagcucca.....       |                   |                                   |                                   | 1283 | 0 | seq |
| .....cCguaauuccagcucca.....      |                   |                                   |                                   | 1    | 1 | seq |
| .....cgguauuccUgcucca.....       |                   |                                   |                                   | 1    | 1 | seq |
| .....cgguauuccagcuccC.....       |                   |                                   |                                   | 16   | 1 | seq |
| .....cggGaaauccagcucca.....      |                   |                                   |                                   | 1    | 1 | seq |
| .....cgguauuccagcuccU.....       |                   |                                   |                                   | 16   | 1 | seq |
| .....cgguauuccaUcucca.....       |                   |                                   |                                   | 1    | 1 | seq |
| .....cgguauuccagcuUca.....       |                   |                                   |                                   | 2    | 1 | seq |
| .....Ngguaauuccagcucca.....      |                   |                                   |                                   | 1    | 1 | seq |
| .....cgguauuccagcucca.....       |                   |                                   |                                   | 1    | 1 | seq |
| .....cgguauuccagUucca.....       |                   |                                   |                                   | 1    | 1 | seq |
| .....cgguauuccGgcucca.....       |                   |                                   |                                   | 6    | 1 | seq |
| .....cgguauuuUcagcucca.....      |                   |                                   |                                   | 2    | 1 | seq |
| .....cgguauGuuccagcucca.....     |                   |                                   |                                   | 2    | 1 | seq |
| .....cggCaauuccagcucca.....      |                   |                                   |                                   | 2    | 1 | seq |
| .....cgguaaCuccagcucca.....      |                   |                                   |                                   | 4    | 1 | seq |
| .....cgguauuccagAucca.....       |                   |                                   |                                   | 1    | 1 | seq |
| .....Ggguauuccagcucca.....       |                   |                                   |                                   | 1    | 1 | seq |
| .....cgguauuccagcGcca.....       |                   |                                   |                                   | 4    | 1 | seq |
| .....cgguauuccagcuccG.....       |                   |                                   |                                   | 49   | 1 | seq |
| .....cgguGauuccagcucca.....      |                   |                                   |                                   | 2    | 1 | seq |
| .....cgguauuccagcAcCa.....       |                   |                                   |                                   | 3    | 1 | seq |
| .....cgguauuccagcuccCa.....      |                   |                                   |                                   | 1    | 1 | seq |
| .....cgguauGuuccagcuccaa.....    |                   |                                   |                                   | 1    | 1 | seq |
| .....cCguaauuccagcuccaa.....     |                   |                                   |                                   | 1    | 1 | seq |
| .....cgguauuccagcuccGa.....      |                   |                                   |                                   | 1    | 1 | seq |
| .....cgguauuccagcuccaa.....      |                   |                                   |                                   | 292  | 0 | seq |
| .....Ggguauuccagcuccaa.....      |                   |                                   |                                   | 1    | 1 | seq |
| .....cggAauuccagcuccaa.....      |                   |                                   |                                   | 1    | 1 | seq |

## Mature

## Star

ggaaaguuuggugccaucagcca**cggu**aauuccagcuccaaauuuuguuuuuaaguuguuuuuaaaauuuguuuuuggauuuuggguuuuuaaaggucaguccac

|                                                  |     |   |     |
|--------------------------------------------------|-----|---|-----|
| .....cgguaa <u>uuccagcucca</u> G.....            | 7   | 1 | seq |
| .....cggGaa <u>uuccagcucca</u> a.....            | 1   | 1 | seq |
| .....cgguaa <u>uuGcagcucca</u> a.....            | 1   | 1 | seq |
| .....cgguaa <u>Cccagcucca</u> a.....             | 1   | 1 | seq |
| .....cgguaa <u>uuccagc</u> Cccaa <u>u</u> .....  | 1   | 1 | seq |
| .....cgguaa <u>uuAcagcucca</u> u.....            | 1   | 1 | seq |
| .....cgguaa <u>Cuccagcucca</u> u.....            | 2   | 1 | seq |
| .....cgguaa <u>uuccagcucca</u> AA.....           | 4   | 1 | seq |
| .....cgCuaa <u>uuccagcucca</u> u.....            | 1   | 1 | seq |
| .....cgguaa <u>uuccagcucca</u> u.....            | 764 | 0 | seq |
| .....Ggguaa <u>uuccagcucca</u> u.....            | 3   | 1 | seq |
| .....cgguaa <u>Guuccagcucca</u> u.....           | 1   | 1 | seq |
| .....cgguaa <u>uuccagcucca</u> AC.....           | 74  | 1 | seq |
| .....cgguaa <u>uuccagcucca</u> Gu.....           | 1   | 1 | seq |
| .....cgguaa <u>uuccagc</u> Accaa <u>u</u> .....  | 2   | 1 | seq |
| .....cUguaa <u>uuccagcucca</u> u.....            | 1   | 1 | seq |
| .....cgguaa <u>uuccag</u> Uuccaa <u>u</u> .....  | 1   | 1 | seq |
| .....cgguaa <u>uuccGgcucca</u> u.....            | 2   | 1 | seq |
| .....cggAaa <u>uuccagcucca</u> u.....            | 1   | 1 | seq |
| .....cgguaa <u>Cccagcucca</u> u.....             | 1   | 1 | seq |
| .....cgguaa <u>uuccagc</u> uUcaa <u>u</u> .....  | 1   | 1 | seq |
| .....cgguaa <u>uuccagcucca</u> AG.....           | 10  | 1 | seq |
| .....cgguaa <u>uuccagcucc</u> Gau.....           | 1   | 1 | seq |
| .....cgguaa <u>Cuccagcucca</u> ua.....           | 1   | 1 | seq |
| .....cgguaa <u>uuccagc</u> Cccaa <u>u</u> .....  | 2   | 1 | seq |
| .....cgguaa <u>Cccagcucca</u> ua.....            | 1   | 1 | seq |
| .....Ggguaa <u>uuccagcucca</u> ua.....           | 1   | 1 | seq |
| .....cgguaa <u>Guuccagcucca</u> ua.....          | 1   | 1 | seq |
| .....cgguaa <u>uuccagcucca</u> uG.....           | 6   | 1 | seq |
| .....cgguGaa <u>uuccagcucca</u> ua.....          | 1   | 1 | seq |
| .....cgguaa <u>uuUcagcucca</u> ua.....           | 1   | 1 | seq |
| .....cCguaa <u>uuccagcucca</u> ua.....           | 1   | 1 | seq |
| .....cgguaa <u>uuccagcucca</u> Ca.....           | 3   | 1 | seq |
| .....cgguaa <u>uuccagcucca</u> ua.....           | 320 | 0 | seq |
| .....cgguaa <u>uuccagcucca</u> uaGu.....         | 40  | 1 | seq |
| .....cgguaa <u>uuccagcucca</u> uaCu.....         | 1   | 1 | seq |
| .....cgguaa <u>uuccagcucca</u> uaGug.....        | 3   | 1 | seq |
| .....cgguaa <u>uuccagcucca</u> uaGugu.....       | 4   | 1 | seq |
| .....cgguaa <u>uuccagcucca</u> uaGugua.....      | 1   | 1 | seq |
| .....cgguaa <u>uuccagcucca</u> uaGuguua.....     | 1   | 1 | seq |
| .....cgguaa <u>uuccagcucca</u> uaGuguauuuu.....  | 1   | 1 | seq |
| .....cgguaa <u>uuccagcucca</u> uaGuguauuuua..... | 1   | 1 | seq |
| .....gguaa <u>uuccagcucca</u> a.....             | 8   | 0 | seq |
| .....gguaa <u>uuccagcucca</u> G.....             | 1   | 1 | seq |
| .....gguaa <u>uuccagcucca</u> AC.....            | 2   | 1 | seq |
| .....gguaa <u>uuccagcucca</u> u.....             | 23  | 0 | seq |
| .....gguaa <u>uuccagcucca</u> uG.....            | 1   | 1 | seq |
| .....gguaa <u>uuccagcucca</u> ua.....            | 15  | 0 | seq |
| .....gguaa <u>uuccagcucca</u> uaGu.....          | 1   | 1 | seq |
| .....guaa <u>uuccagcucc</u> Gau.....             | 1   | 1 | seq |
| .....guaa <u>uuccagcucca</u> AC.....             | 22  | 1 | seq |
| .....guaa <u>uucAagcucca</u> u.....              | 1   | 1 | seq |
| .....guaa <u>uuccagc</u> uUcaa <u>u</u> .....    | 1   | 1 | seq |
| .....Nuaa <u>uuccagcucca</u> u.....              | 1   | 1 | seq |
| .....guaa <u>uuccagcucca</u> AG.....             | 1   | 1 | seq |
| .....guaa <u>uuccagcucca</u> u.....              | 128 | 0 | seq |
| .....guaa <u>uuccGgcucca</u> u.....              | 1   | 1 | seq |
| .....guUaa <u>uuccagcucca</u> ua.....            | 1   | 1 | seq |
| .....guaa <u>uuccGgcucca</u> ua.....             | 1   | 1 | seq |
| .....guaa <u>uuccagcucca</u> uG.....             | 1   | 1 | seq |
| .....guaa <u>uuccagcucca</u> ua.....             | 98  | 0 | seq |
| .....uaa <u>uuccagc</u> Cccaa <u>u</u> .....     | 1   | 1 | seq |
| .....uaa <u>uuccagcucca</u> ua.....              | 72  | 0 | seq |
| .....uaa <u>Cccagcucca</u> ua.....               | 1   | 1 | seq |
| .....Ca <u>auuccagcucca</u> ua.....              | 1   | 1 | seq |
| .....uaa <u>uuccagcucca</u> uG.....              | 2   | 1 | seq |
| .....uaa <u>uuccagcucc</u> Gua.....              | 1   | 1 | seq |
| .....uaa <u>Cuccagcucca</u> ua.....              | 1   | 1 | seq |
| .....uaa <u>uuccagcucca</u> ua <u>u</u> Cg.....  | 1   | 1 | seq |
| .....a <u>uuccagcucca</u> uaCu.....              | 1   | 1 | seq |

## Mature

Star

ggaaaguuuggugccaucagcca**cgguaauccagcucca**aua**u**guauauuuaaguuguaguaaaa**uu**guaguggaucu**ggg**uuguaaaggucaguccac

|                                    |     |   |     |
|------------------------------------|-----|---|-----|
| .auuccagcuccaaauaUC.               | 1   | 1 | seq |
| .auuccagcuccaaauaCg.               | 1   | 1 | seq |
| .uuccagcuccaaauaCg.                | 1   | 1 | seq |
| .uuccagcuccaauaGugua.              | 1   | 1 | seq |
| .uuccagcuccaauaGuguaua.            | 1   | 1 | seq |
| .uuccagcuccaaauaCguaua.            | 1   | 1 | seq |
| .uuccagcuccaauaGuguauuu.           | 1   | 1 | seq |
| .uuccagcuccaaauaCguauuuu.          | 1   | 1 | seq |
| .uuccagcuccaauaGuguauuuu.          | 1   | 1 | seq |
| .uuccagcuccaaauaCguauuuuuagauguug. | 1   | 1 | seq |
| .uccagcuccaauaGugua.               | 1   | 1 | seq |
| .ccagcuccaauaGuguauuu.             | 1   | 1 | seq |
| .cagcuccaauaGuguaua.               | 1   | 1 | seq |
| .auauCguauuuuuagaugu.              | 1   | 1 | seq |
| .guauuuuuagauguug.                 | 14  | 0 | seq |
| .guauuuuuagauguuC.                 | 1   | 1 | seq |
| .Uuauuuuuagauguug.                 | 1   | 1 | seq |
| .guauuuuuagauguugu.                | 1   | 0 | seq |
| .uauuuuuagauguugu.                 | 1   | 0 | seq |
| .uauuuuuagauguugua.                | 1   | 0 | seq |
| .uauuuuagauguuguagu.               | 1   | 0 | seq |
| .uauuuuagauguuguaguC.              | 1   | 1 | seq |
| .uuuagauguugGagu.                  | 2   | 1 | seq |
| .uuuagauguuguaguuaa.               | 2   | 0 | seq |
| .aguuguuguaguuaaaa.                | 1   | 0 | seq |
| .Cauuguaguuggaucu.                 | 1   | 1 | seq |
| .auAguaguuggaucuug.                | 1   | 1 | seq |
| .uuguaguuggaucuugg.                | 1   | 0 | seq |
| .uuguaguuggaucuuga.                | 1   | 1 | seq |
| .Cuguaguuggaucuuggg.               | 1   | 1 | seq |
| .UGGuaguuggaucuuggg.               | 1   | 1 | seq |
| .uuguaguuggaucuugggu.              | 1   | 0 | seq |
| .UGGuaguuggaucuugggg.              | 1   | 1 | seq |
| .uguaguuggaucuuggg.                | 2   | 0 | seq |
| .GGuaguuggaucuuggg.                | 1   | 1 | seq |
| .uguaguuggaucuuggU.                | 1   | 1 | seq |
| .uguaguuggaucuuggA.                | 1   | 1 | seq |
| .GGuaguuggaucuugggu.               | 2   | 1 | seq |
| .uguaguuggaucuugggg.               | 3   | 0 | seq |
| .guaguuggaucuuggggG.               | 30  | 1 | seq |
| .guaguuggaucuAggu.                 | 1   | 1 | seq |
| .guaguuggaucuuggUu.                | 2   | 1 | seq |
| .Cuaguuggaucuugggu.                | 1   | 1 | seq |
| .guaguuggaucCugggu.                | 1   | 1 | seq |
| .guaguuggauUuugggu.                | 1   | 1 | seq |
| .guaguGggaucucugggu.               | 1   | 1 | seq |
| .guaguuggaucucuggCu.               | 3   | 1 | seq |
| .guaguCggaucucugggu.               | 3   | 1 | seq |
| .guaguuggaucucugggA.               | 16  | 1 | seq |
| .guaguAggaucucugggu.               | 1   | 1 | seq |
| .guaguuggaucucugggu.               | 879 | 0 | seq |
| .Nuaguuggaucucugggu.               | 2   | 1 | seq |
| .guaguugAaucucugggu.               | 2   | 1 | seq |
| .guagCuggaucucugggu.               | 2   | 1 | seq |
| .guaguuggaucuAgu.                  | 3   | 1 | seq |
| .guaguuggaucuCgggu.                | 4   | 1 | seq |
| .Uuaguuggaucucugggu.               | 1   | 1 | seq |
| .guaguCggaucucugggu.               | 1   | 1 | seq |
| .guaguuggaucucuggUuu.              | 1   | 1 | seq |
| .guaguuggaucucuggguG.              | 8   | 1 | seq |
| .guaguuggaucucuggguu.              | 135 | 0 | seq |
| .guaguuggGducucugggu.              | 1   | 1 | seq |
| .Uuaguuggaucucuggguu.              | 1   | 1 | seq |
| .guaguuggaucucuggguAg.             | 4   | 1 | seq |
| .guaguuggaucucuggguug.             | 13  | 0 | seq |
| .guaguuggaucucuggguugC.            | 1   | 1 | seq |
| .guaguuggaucucuggguugu.            | 1   | 0 | seq |
| .guaguuggaucucuggguGgu.            | 1   | 1 | seq |
| .guaguuggaucucuggguAgu.            | 1   | 1 | seq |
| .guaguuggaucucuggguugua.           | 1   | 0 | seq |



## Mature

Star

ggaaaguuuggugccaucagcca**cggu**aauuccagcuccaauauguauuuuaaguuguaguuuuuuuauuguaguuggaucu**ugggu**uguaaaggucaguccac

|                                            |     |   |     |
|--------------------------------------------|-----|---|-----|
| .guaguuggaucuuuggguGgua . . . . .          | 1   | 1 | seq |
| .guaguuggaucuuuggguAagua . . . . .         | 2   | 1 | seq |
| .guaguuggaucuuuggguuuguaa . . . . .        | 2   | 0 | seq |
| .guaguuggaucuuuggguuuguaaaaggu . . . . .   | 1   | 0 | seq |
| .uGguuuggaucuuuggguu . . . . .             | 1   | 1 | seq |
| .uaguuggaucuuuggguu . . . . .              | 167 | 0 | seq |
| .uaguuggaucGuuggguu . . . . .              | 1   | 1 | seq |
| .uaguuggaucuuuggAuu . . . . .              | 1   | 1 | seq |
| .uaguuggaucuuAagguu . . . . .              | 2   | 1 | seq |
| .uaguCgggaucuuuggguu . . . . .             | 2   | 1 | seq |
| .uaguuggaucCuggguu . . . . .               | 2   | 1 | seq |
| .uaguuggaucuuuggguG . . . . .              | 9   | 1 | seq |
| .uaguuggaucuuuggguGu . . . . .             | 1   | 1 | seq |
| .uaguuggGucuuuggguu . . . . .              | 1   | 1 | seq |
| .uaguuggaucuuuggUuu . . . . .              | 1   | 1 | seq |
| .uaguuggaucuuuggguuC . . . . .             | 2   | 1 | seq |
| .uaguuggaucuuuggguAag . . . . .            | 11  | 1 | seq |
| .uaguuggaucuuuggguGg . . . . .             | 2   | 1 | seq |
| .uaguuggaucuuuggguuA . . . . .             | 3   | 1 | seq |
| .uaguuggaucuuuggguAug . . . . .            | 1   | 1 | seq |
| .uaguuggaucuuuggguug . . . . .             | 25  | 0 | seq |
| .uaguuggaucuuuggguuugu . . . . .           | 3   | 0 | seq |
| .uaguuggaucuuuggguGgu . . . . .            | 2   | 1 | seq |
| .uaguuggaucuuuggguGgua . . . . .           | 1   | 1 | seq |
| .uaguuggaucuuuggguuugua . . . . .          | 5   | 0 | seq |
| .uaguuggGucuuuggguugua . . . . .           | 1   | 1 | seq |
| .uaguuggaucuuuggguAagua . . . . .          | 1   | 1 | seq |
| .uaguuggaucuuuggguuuguaa . . . . .         | 1   | 0 | seq |
| .uaguuggaucuuuggguuuguaaAG . . . . .       | 1   | 1 | seq |
| .uaguuggaucuuuggguuuguaaa . . . . .        | 1   | 0 | seq |
| .uaguuggaucuuuggguuuguaaaag . . . . .      | 3   | 0 | seq |
| .uaguuggaucuuuggguuuguaaaaagguca . . . . . | 1   | 0 | seq |
| .aguuggaucuuuggguAag . . . . .             | 1   | 1 | seq |
| .aguuggaucuuuggguug . . . . .              | 4   | 0 | seq |
| .aguuggaucuuuggguuugu . . . . .            | 2   | 0 | seq |
| .aguuggaucuuuggguuugua . . . . .           | 3   | 0 | seq |
| .aguuggaucuuuggguuuguaU . . . . .          | 1   | 1 | seq |
| .aguuggaucuuuggguuuguaaa . . . . .         | 1   | 0 | seq |
| .aguuggaucuuuggguuuguaaaagg . . . . .      | 1   | 0 | seq |
| .aguuggaucuuuggguuuguaaaagguc . . . . .    | 1   | 0 | seq |
| .guuggaucuuuggguuugu . . . . .             | 6   | 0 | seq |
| .guuggaucuuuggguAgu . . . . .              | 3   | 1 | seq |
| .guuggaucuuuggguuugG . . . . .             | 1   | 1 | seq |
| .guuggaucuuuggguuugua . . . . .            | 17  | 0 | seq |
| .guuggaucuuuggguAagua . . . . .            | 3   | 1 | seq |
| .guuggaucuuuggguuuguaa . . . . .           | 6   | 0 | seq |
| .guuggaucuuuggguGuaa . . . . .             | 1   | 1 | seq |
| .guuggaucuuuggguuuguaaa . . . . .          | 3   | 0 | seq |
| .guuggaucuuuggguuuguaaaag . . . . .        | 1   | 0 | seq |
| .guuggaucuuuggguuuguaaaagg . . . . .       | 1   | 0 | seq |
| .guuggaucuuuggguAguaaagg . . . . .         | 1   | 1 | seq |
| .guuggaucuuuggguGguaaaggu . . . . .        | 1   | 1 | seq |
| .guuggaucuuuggguuuguaaaaggC . . . . .      | 1   | 1 | seq |
| .guuggaucuuuggguuuguaaaaggu . . . . .      | 1   | 0 | seq |
| .guuggaucuuuggguuuguaaaagguc . . . . .     | 4   | 0 | seq |
| .uugggaucuuuggguAagua . . . . .            | 5   | 1 | seq |
| .uugggaucuuuggguuugua . . . . .            | 11  | 0 | seq |
| .uugggaucuuuggguugCa . . . . .             | 1   | 1 | seq |
| .uugggaucuuuggguuugC . . . . .             | 1   | 1 | seq |
| .uugggaucuuuggguuugua . . . . .            | 4   | 0 | seq |
| .uugggaucuuuggguGuaaa . . . . .            | 1   | 1 | seq |
| .uugggaucuuuggguuuguaaa . . . . .          | 2   | 0 | seq |
| .uugggaucuuuggguuuguaaaag . . . . .        | 3   | 0 | seq |
| .uugggaucuuuggguuuguaaaagg . . . . .       | 2   | 0 | seq |
| .uugggaucuuuggguGguaaagg . . . . .         | 1   | 1 | seq |
| .uugggaucuuuggguuuguaaaaggu . . . . .      | 2   | 0 | seq |
| .uugggaucuuuggguuuguaaaagguc . . . . .     | 1   | 0 | seq |
| .uugggaucuuuggguuuguaa . . . . .           | 2   | 0 | seq |
| .uugggaucuuuggguAguaa . . . . .            | 1   | 1 | seq |
| .uugggaucuuuggguuuguaaa . . . . .          | 3   | 0 | seq |

## Mature

Star

[illegible]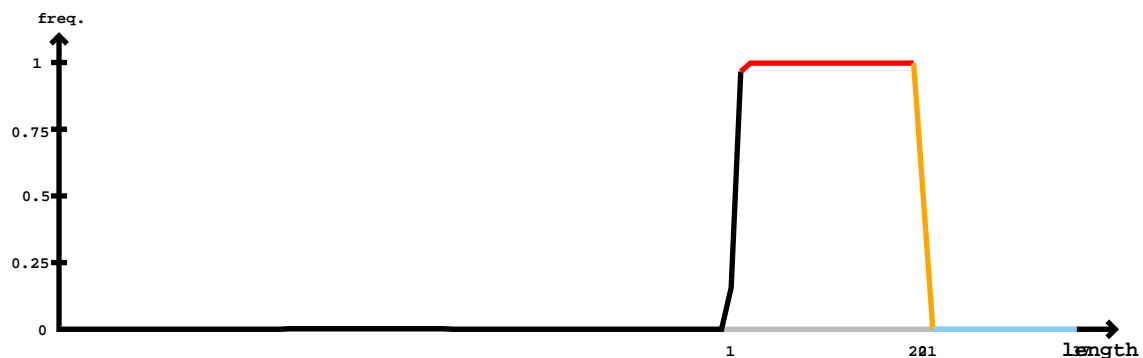

|                                                                                                                   | Mature | Star |       |     |        |
|-------------------------------------------------------------------------------------------------------------------|--------|------|-------|-----|--------|
| 5'- agagaaucucaggauaaugccugcuaaugaagacagauucagaaauaaccuccagagaaugaagaguuugaauugaugacuuguauugcuaacaagucuucaaacucuu |        |      | -3'   | exp |        |
| ...((((((((((.....)))).....)))))).....((((((((((.....((((((((((((.....))))))))))))))))))))))                      |        |      | reads | mm  | sample |
| .....gcuaaugaugGacagau.....                                                                                       |        |      | 1     | 1   | seq    |
| .....uGuaaugaugacuuguauug.....                                                                                    |        |      | 64    | 1   | seq    |
| .....uGuaaugaugacuuguauugc.....                                                                                   |        |      | 5     | 1   | seq    |
| .....Guaaugaugacuuguauug.....                                                                                     |        |      | 1     | 1   | seq    |
| .....Guaaugaugacuuguauug.....                                                                                     |        |      | 352   | 1   | seq    |
| .....Guaaugaugacuuguauugc.....                                                                                    |        |      | 5     | 1   | seq    |
| .....ugaugaugacuuguauug.....                                                                                      |        |      | 10    | 0   | seq    |
| .....ugaugaugacuuguauugU.....                                                                                     |        |      | 4     | 1   | seq    |

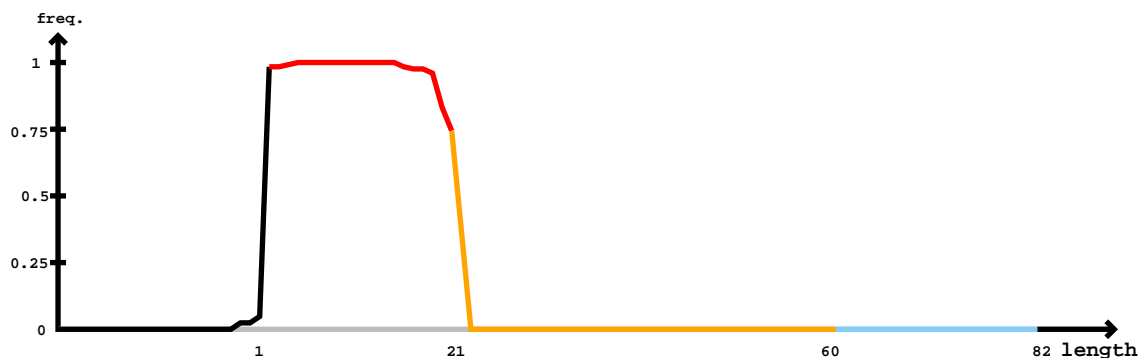

Star

[illegible]

[illegible]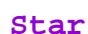[illegible]

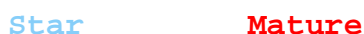

| 5' |                                                                                                                                                        | -3'   | exp |        |
|----|--------------------------------------------------------------------------------------------------------------------------------------------------------|-------|-----|--------|
|    | gagucgaaaucucaagaggaaauagugcaaggcaugcacaggugaa <u>cuuauuuuuaauguu</u> <u>aaaaauuuag</u> <u>gaggugua</u> <u>gaaauaggug</u> <u>gaggcugagaagucagcucac</u> |       |     |        |
|    | (((((.(.(.((((.....(((((.)))))).....((((((((((.(.((((.....))))).).....)))))))))).....))))))..                                                          | reads | mm  | sample |
|    | .....ggagguguaagaa <u>uA</u> gugg.....                                                                                                                 | 3     | 1   | seq    |
|    | .....ggagguguaagaa <u>uagg</u> gU.....                                                                                                                 | 1     | 1   | seq    |
|    | .....gagguguaagaa <u>uagg</u> g.....                                                                                                                   | 36    | 0   | seq    |
|    | .....gagguguUgaa <u>uagg</u> g.....                                                                                                                    | 1     | 1   | seq    |
|    | .....gagguguaagaa <u>uagg</u> uA.....                                                                                                                  | 2     | 1   | seq    |
|    | .....gagguguaagaa <u>uagg</u> uU.....                                                                                                                  | 1     | 1   | seq    |
|    | .....gagguguaagaa <u>uA</u> gug.....                                                                                                                   | 2     | 1   | seq    |
|    | .....gagguguaagaa <u>uA</u> gugg.....                                                                                                                  | 1     | 1   | seq    |
|    | .....gagguguaagaa <u>uagg</u> gg.....                                                                                                                  | 12    | 0   | seq    |
|    | .....gagguguaagaa <u>uagg</u> gA.....                                                                                                                  | 2     | 1   | seq    |
|    | .....gagguguaagaa <u>uagg</u> ggG.....                                                                                                                 | 10    | 1   | seq    |
|    | .....gagguguaagaa <u>uagg</u> ggU.....                                                                                                                 | 1     | 1   | seq    |
|    | .....gagguguaagaa <u>uagg</u> ggGg.....                                                                                                                | 1     | 1   | seq    |
|    | .....agguguaagaa <u>uagg</u> gA.....                                                                                                                   | 2     | 1   | seq    |
|    | .....agguguaagaa <u>uagg</u> g.....                                                                                                                    | 5     | 0   | seq    |
|    | .....agguguaagaa <u>uagg</u> ggG.....                                                                                                                  | 6     | 1   | seq    |
|    | .....agguguaagaa <u>uagg</u> ggaggC.....                                                                                                               | 1     | 1   | seq    |
|    | .....gguguaagaa <u>uA</u> guggag.....                                                                                                                  | 1     | 1   | seq    |
|    | .....guagaa <u>uA</u> guggag.....                                                                                                                      | 1     | 1   | seq    |

[illegible]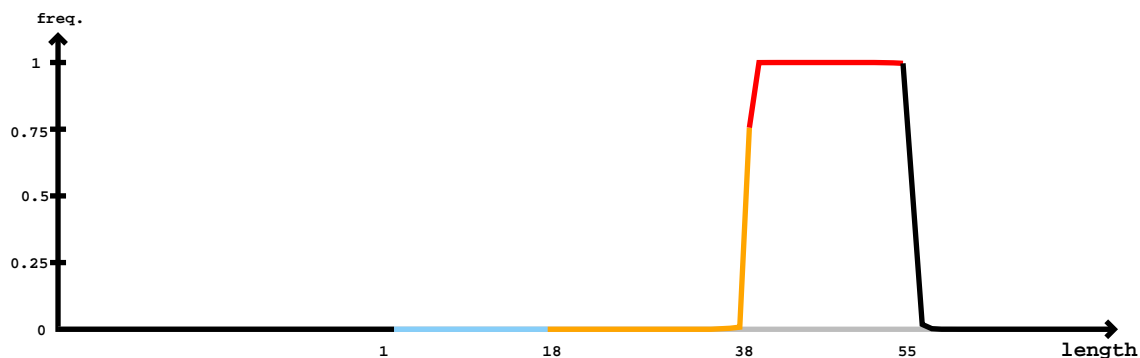

## Mature

|    |                                                                                                             |       |           |
|----|-------------------------------------------------------------------------------------------------------------|-------|-----------|
| 5' | aucaaaauccaaaaucgcgaauacacugaacaaccuuuuccugcgcguggaaagaaacagacgguuuuccagcggaggaaaagaacagacguugacacauccuacua | -3'   | exp       |
|    | .(((((((((.....(((((((.....))))))))).....)))))).....))))).))))).                                            | reads | mm sample |
|    | .....ucAagcggaggaaaaga.....                                                                                 | 10    | 1 seq     |
|    | .....uUcagcggaggaaaaga.....                                                                                 | 1     | 1 seq     |
|    | .....uUcagcggaggaaaagaa.....                                                                                | 1     | 1 seq     |
|    | .....ucAagcggaggaaaagaa.....                                                                                | 5     | 1 seq     |
|    | .....uUcagcggaggaaaagaaa.....                                                                               | 1     | 1 seq     |
|    | .....ucAagcggaggaaaagaaa.....                                                                               | 5     | 1 seq     |
|    | .....ucAagcggaggaaaagaaaac.....                                                                             | 12    | 1 seq     |
|    | .....cAagcggaggaaaagaa.....                                                                                 | 7     | 1 seq     |
|    | .....cAagcggaggaaaagaaa.....                                                                                | 13    | 1 seq     |
|    | .....Ucagcggaggaaaagaaaac.....                                                                              | 1     | 1 seq     |
|    | .....cAagcggaggaaaagaaaac.....                                                                              | 14    | 1 seq     |
|    | .....cagcggaggaaaagaaa.....                                                                                 | 3     | 0 seq     |
|    | .....Uagcggaggaaaagaaa.....                                                                                 | 7     | 1 seq     |
|    | .....Nagcggaggaaaagaaa.....                                                                                 | 3     | 1 seq     |
|    | .....Gagcggaggaaaagaaaac.....                                                                               | 20    | 1 seq     |
|    | .....cagcggaggaaaagaaaac.....                                                                               | 6     | 0 seq     |
|    | .....Uagcggaggaaaagaaaac.....                                                                               | 6     | 1 seq     |
|    | .....Nagcggaggaaaagaaaac.....                                                                               | 6     | 1 seq     |
|    | .....Uagcggaggaaaagaaaaca.....                                                                              | 1     | 1 seq     |
|    | .....cagcggaggaaaagaaaacC.....                                                                              | 1     | 1 seq     |
|    | .....cagcggaggaaaagaaaacU.....                                                                              | 21    | 1 seq     |
|    | .....Gagcggaggaaaagaaaaca.....                                                                              | 1     | 1 seq     |
|    | .....agcggaggaaaagaaaCc.....                                                                                | 3     | 1 seq     |
|    | .....agcggaggaaaagGaac.....                                                                                 | 20    | 1 seq     |
|    | .....agcggaggaaaagGac.....                                                                                  | 34    | 1 seq     |
|    | .....agcggaggaaaagCaac.....                                                                                 | 1     | 1 seq     |
|    | .....agcggUggaaaagaaaac.....                                                                                | 1     | 1 seq     |
|    | .....Ugcggaggaaaagaaaac.....                                                                                | 4     | 1 seq     |
|    | .....agcUgaggaaaagaaaac.....                                                                                | 3     | 1 seq     |
|    | .....agcggaggaaUagaaaac.....                                                                                | 6     | 1 seq     |
|    | .....agcggaggGaaagaaaac.....                                                                                | 19    | 1 seq     |
|    | .....agcggaggaaaUgaaaac.....                                                                                | 2     | 1 seq     |
|    | .....agcggaggCaaagaaaac.....                                                                                | 1     | 1 seq     |
|    | .....agcggaggaaaagaaaac.....                                                                                | 6946  | 0 seq     |

## Star

## Mature

aucaaaauccaaaauccgcaauacacugaacaaaccuuuuuccugcgcugggaaagaaacagacguuuuccagcggaggagaaaagaaacagacguugacacauccuacua

|                                 |      |   |     |
|---------------------------------|------|---|-----|
| .....agcggaggaaaaagaGac.....    | 30   | 1 | seq |
| .....agcggaggUaaagaaac.....     | 5    | 1 | seq |
| .....agcggagAaaaagaaac.....     | 2    | 1 | seq |
| .....agcggaggaaaCGaaac.....     | 1    | 1 | seq |
| .....agcggaggaaaagUaac.....     | 1    | 1 | seq |
| .....Ngcggaggaaaagaaac.....     | 10   | 1 | seq |
| .....agcggCGgaaaagaaac.....     | 1    | 1 | seq |
| .....agcggagggaUaaagaaac.....   | 1    | 1 | seq |
| .....agcggagUaaaagaaac.....     | 1    | 1 | seq |
| .....agcgggaCgaaaagaaac.....    | 1    | 1 | seq |
| .....agcggagggaGagaaac.....     | 28   | 1 | seq |
| .....Cgcggaggaaaagaaac.....     | 7    | 1 | seq |
| .....agcggaggaaaagaCac.....     | 1    | 1 | seq |
| .....agcCGaggaaaagaaac.....     | 1    | 1 | seq |
| .....Ggcggaggaaaagaaac.....     | 34   | 1 | seq |
| .....aCgggaggaaaagaaac.....     | 1    | 1 | seq |
| .....agcgUaggaaaagaaac.....     | 3    | 1 | seq |
| .....agcggaggaaaagaaaca.....    | 377  | 0 | seq |
| .....agcAgaggaaaagaaaca.....    | 1    | 1 | seq |
| .....agcggaggGaaagaaaca.....    | 1    | 1 | seq |
| .....agcgggaAaaaagaaaca.....    | 1    | 1 | seq |
| .....agcggaggaaaagGaaca.....    | 4    | 1 | seq |
| .....Ggcggaggaaaagaaaca.....    | 3    | 1 | seq |
| .....agcggaggaaaagaaUca.....    | 1    | 1 | seq |
| .....agcggUGgaaaagaaaca.....    | 1    | 1 | seq |
| .....agcggaggaaaagaaacC.....    | 5314 | 1 | seq |
| .....agcggaggaaaagaaGca.....    | 3    | 1 | seq |
| .....agcggaggaaaagGaca.....     | 6    | 1 | seq |
| .....agcggGggaaaagaaaca.....    | 2    | 1 | seq |
| .....agcggaggaaaagaaacG.....    | 641  | 1 | seq |
| .....agcggaggaaaagaaCca.....    | 3    | 1 | seq |
| .....Ngcggaggaaaagaaaca.....    | 2    | 1 | seq |
| .....agcggagggaGagaaaca.....    | 3    | 1 | seq |
| .....agcggaggaaaagaaacUg.....   | 150  | 1 | seq |
| .....agcggaggaaaagaaacag.....   | 1    | 0 | seq |
| .....agcggaggaaaagaaacCg.....   | 1    | 1 | seq |
| .....agcggaggaaaagaaacaU.....   | 8    | 1 | seq |
| .....agcggaggaaaagaaacUga.....  | 17   | 1 | seq |
| .....agcggaggaaaagaaacaUa.....  | 2    | 1 | seq |
| .....agcggaggaaaagaaacagC.....  | 1    | 1 | seq |
| .....agcggaggaaaagaaacaUac..... | 1    | 1 | seq |
| .....gcggaggaaaagaaaca.....     | 248  | 0 | seq |
| .....gcggaggaaaagGaaca.....     | 2    | 1 | seq |
| .....gcggagggaGaaagaaaca.....   | 1    | 1 | seq |
| .....gcggaggaaaagaaGca.....     | 4    | 1 | seq |
| .....gcggaggaaaagaaCca.....     | 2    | 1 | seq |
| .....gcggaggaaaagaaacC.....     | 3651 | 1 | seq |
| .....gcggaggGaaagaaaca.....     | 2    | 1 | seq |
| .....gcggaggaaaagaGaca.....     | 1    | 1 | seq |
| .....Acggaggaaaagaaaca.....     | 1    | 1 | seq |
| .....gcggaggaaaCGaaaca.....     | 1    | 1 | seq |
| .....gcggaggaaaagaaacG.....     | 404  | 1 | seq |
| .....gcggGggaaaagaaaca.....     | 1    | 1 | seq |
| .....gcggagAaaaagaaaca.....     | 1    | 1 | seq |
| .....gcggaggaaaagaaacaU.....    | 6    | 1 | seq |
| .....gcggaggaaaagaaacag.....    | 1    | 0 | seq |
| .....gcggaggaaaagaaacUg.....    | 127  | 1 | seq |
| .....gcggaggaaaagaaacaUa.....   | 5    | 1 | seq |
| .....gcggaggaaaagaaacUga.....   | 10   | 1 | seq |
| .....gcggaggaaaagaaacagGcg..... | 1    | 1 | seq |
| .....cggaggaaaagaaacag.....     | 1    | 0 | seq |
| .....cggaggaaaagaaacUga.....    | 2    | 1 | seq |
| .....ggaggaaaagaaacUga.....     | 2    | 1 | seq |





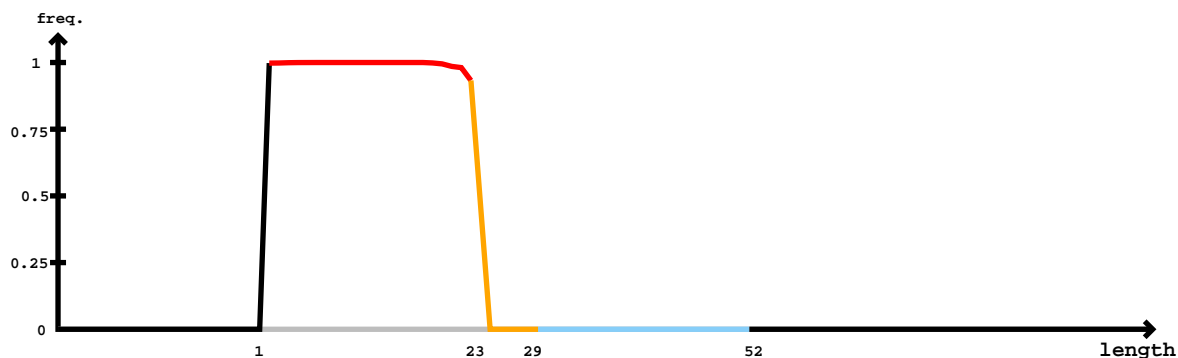

Star

| 5'- | auggcgggc | caaauguguuu | uaacgucugggccacgaugguu | gauaaa | cacaucguaggcggaugggaag | ucgaugcagagcagaccguagaggaggaaagagcagaagga | -3'   | exp |        |
|-----|-----------|-------------|------------------------|--------|------------------------|-------------------------------------------|-------|-----|--------|
| ... | (((((     | (((((       | (((((                  | (((((  | (((((                  | (((((                                     | reads | mm  | sample |
| ... | (((((     | (((((       | (((((                  | (((((  | (((((                  | (((((                                     | 1     | 1   | seq    |
| ... | (((((     | (((((       | (((((                  | (((((  | (((((                  | (((((                                     | 1     | 1   | seq    |
| ... | (((((     | (((((       | (((((                  | (((((  | (((((                  | (((((                                     | 149   | 1   | seq    |
| ... | (((((     | (((((       | (((((                  | (((((  | (((((                  | (((((                                     | 1     | 1   | seq    |
| ... | (((((     | (((((       | (((((                  | (((((  | (((((                  | (((((                                     | 312   | 1   | seq    |
| ... | (((((     | (((((       | (((((                  | (((((  | (((((                  | (((((                                     | 1     | 1   | seq    |
| ... | (((((     | (((((       | (((((                  | (((((  | (((((                  | (((((                                     | 3     | 1   | seq    |
| ... | (((((     | (((((       | (((((                  | (((((  | (((((                  | (((((                                     | 836   | 1   | seq    |
| ... | (((((     | (((((       | (((((                  | (((((  | (((((                  | (((((                                     | 418   | 1   | seq    |
| ... | (((((     | (((((       | (((((                  | (((((  | (((((                  | (((((                                     | 1     | 1   | seq    |
| ... | (((((     | (((((       | (((((                  | (((((  | (((((                  | (((((                                     | 1     | 0   | seq    |
| ... | (((((     | (((((       | (((((                  | (((((  | (((((                  | (((((                                     | 4     | 1   | seq    |
| ... | (((((     | (((((       | (((((                  | (((((  | (((((                  | (((((                                     | 5     | 1   | seq    |
| ... | (((((     | (((((       | (((((                  | (((((  | (((((                  | (((((                                     | 4375  | 1   | seq    |
| ... | (((((     | (((((       | (((((                  | (((((  | (((((                  | (((((                                     | 101   | 1   | seq    |
| ... | (((((     | (((((       | (((((                  | (((((  | (((((                  | (((((                                     | 19    | 0   | seq    |
| ... | (((((     | (((((       | (((((                  | (((((  | (((((                  | (((((                                     | 4     | 1   | seq    |
| ... | (((((     | (((((       | (((((                  | (((((  | (((((                  | (((((                                     | 84554 | 1   | seq    |
| ... | (((((     | (((((       | (((((                  | (((((  | (((((                  | (((((                                     | 53    | 1   | seq    |
| ... | (((((     | (((((       | (((((                  | (((((  | (((((                  | (((((                                     | 16    | 1   | seq    |
| ... | (((((     | (((((       | (((((                  | (((((  | (((((                  | (((((                                     | 6     | 1   | seq    |
| ... | (((((     | (((((       | (((((                  | (((((  | (((((                  | (((((                                     | 1     | 1   | seq    |
| ... | (((((     | (((((       | (((((                  | (((((  | (((((                  | (((((                                     | 36    | 1   | seq    |
| ... | (((((     | (((((       | (((((                  | (((((  | (((((                  | (((((                                     | 36    | 1   | seq    |
| ... | (((((     | (((((       | (((((                  | (((((  | (((((                  | (((((                                     | 1     | 1   | seq    |
| ... | (((((     | (((((       | (((((                  | (((((  | (((((                  | (((((                                     | 1     | 1   | seq    |
| ... | (((((     | (((((       | (((((                  | (((((  | (((((                  | (((((                                     | 1     | 1   | seq    |
| ... | (((((     | (((((       | (((((                  | (((((  | (((((                  | (((((                                     | 1     | 1   | seq    |
| ... | (((((     | (((((       | (((((                  | (((((  | (((((                  | (((((                                     | 1     | 1   | seq    |
| ... | (((((     | (((((       | (((((                  | (((((  | (((((                  | (((((                                     | 3     | 1   | seq    |
| ... | (((((     | (((((       | (((((                  | (((((  | (((((                  | (((((                                     | 3     | 1   | seq    |
| ... | (((((     | (((((       | (((((                  | (((((  | (((((                  | (((((                                     | 3     | 1   | seq    |
| ... | (((((     | (((((       | (((((                  | (((((  | (((((                  | (((((                                     | 21    | 1   | seq    |
| ... | (((((     | (((((       | (((((                  | (((((  | (((((                  | (((((                                     | 12    | 1   | seq    |
| ... | (((((     | (((((       | (((((                  | (((((  | (((((                  | (((((                                     | 3     | 1   | seq    |

Mature

Star

|                      |                            |       |        |                       |                                           |  |  |  |
|----------------------|----------------------------|-------|--------|-----------------------|-------------------------------------------|--|--|--|
| auggcgggcaaauguguuuu | aaacgucucuggccccacgaugguug | au    | aaacac | aucguaggcgggauggggaag | ucgaugcagagcagaccguagaggaggaaagagcagaagga |  |  |  |
| .....                | acgucucuggGccacgauggu.     | ..... | 6      | 1                     | seq                                       |  |  |  |
| .....                | acgucucuggGccacgaugguu.    | ..... | 76     | 1                     | seq                                       |  |  |  |
| .....                | acAucuggccccacgaugguu.     | ..... | 2      | 1                     | seq                                       |  |  |  |
| .....                | acgucucuggAccacgaugguu.    | ..... | 6      | 1                     | seq                                       |  |  |  |
| .....                | acgucucuggGccacgaugguug.   | ..... | 1      | 1                     | seq                                       |  |  |  |
| .....                | cgucucuggAccacgaugg.       | ..... | 1      | 1                     | seq                                       |  |  |  |
| .....                | cgucucuggccccacgauggu.     | ..... | 1      | 0                     | seq                                       |  |  |  |
| .....                | cgucucuggAccacgaugguu.     | ..... | 1      | 1                     | seq                                       |  |  |  |
| .....                | cgucucuggGccacgaugguu.     | ..... | 44     | 1                     | seq                                       |  |  |  |
| .....                | cAucuggccccacgaugguu.      | ..... | 1      | 1                     | seq                                       |  |  |  |
| .....                | Aucuggccccacgaugguu.       | ..... | 1      | 1                     | seq                                       |  |  |  |
| .....                | Ccuggccccacgaugguu.        | ..... | 1      | 1                     | seq                                       |  |  |  |
| .....                | ucuggccccacgaugguu.        | ..... | 7      | 0                     | seq                                       |  |  |  |
| .....                | ucuggccccacgaugguC.        | ..... | 2      | 1                     | seq                                       |  |  |  |
| .....                | ucuggccccacgGugguu.        | ..... | 1      | 1                     | seq                                       |  |  |  |
| .....                | ucuggAccacgaugguug.        | ..... | 2      | 1                     | seq                                       |  |  |  |

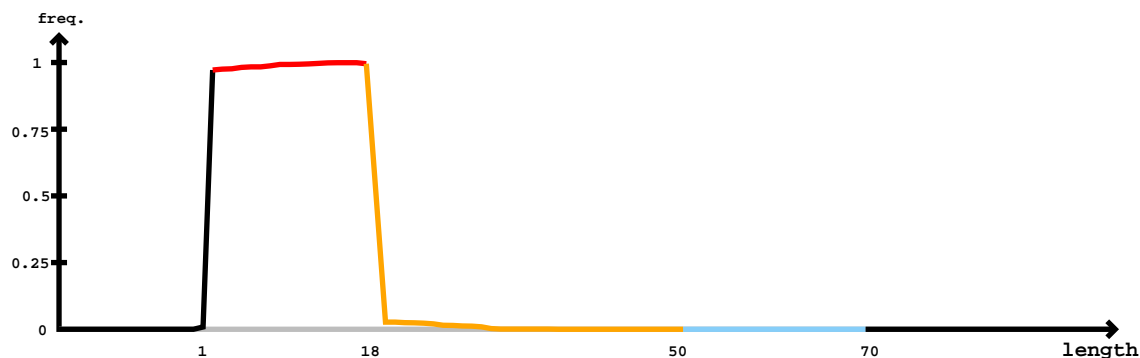

Star

| 5' | ucacauaguuaguuugcuuugggcuagagaguacuuugggauugggugagacuaccuaggaaguccuacuuuuuuacauugccuauuggaaauuguauuaacuuggacuaauuuuac | -3'   | exp |
|----|-----------------------------------------------------------------------------------------------------------------------|-------|-----|
|    | (((((.(((((((((((.(((((((((((((((((((((((.(((.....))))))))))))......))))))))).))))....))))))))))))......              | reads | mm  |
|    | .....ugcuuugggcuagagaguag.....                                                                                        | 3     | 0   |
|    | .....Ngcuuugggcuagagaguag.....                                                                                        | 3     | 1   |
|    | .....ugcuuugggcuagagaguagu.....                                                                                       | 1     | 0   |
|    | .....Ngcuuugggcuagagaguagu.....                                                                                       | 5     | 1   |
|    | .....Cgcuuugggcuagagaguaguc.....                                                                                      | 1     | 1   |
|    | .....gcuuugggcuagagagGagu.....                                                                                        | 1     | 1   |
|    | .....gcuuugggcuagagaguagu.....                                                                                        | 1465  | 0   |
|    | .....Ncuuugggcuagagaguagu.....                                                                                        | 5     | 1   |
|    | .....gcuuugggcuagagauaUuc.....                                                                                        | 1     | 1   |
|    | .....gcuuugggcuagagaguaguc.....                                                                                       | 2     | 0   |
|    | .....gcuuugggcuagagaguaguccu.....                                                                                     | 1     | 0   |
|    | .....gcuuugggcuagagaguaguccuggg.....                                                                                  | 1     | 0   |
|    | .....cuuugggcuagagaguagAc.....                                                                                        | 1     | 1   |
|    | .....cuuugggcuagagaguaguc.....                                                                                        | 3     | 0   |
|    | .....cuuugggcuagagaguaguccuggga.....                                                                                  | 1     | 0   |
|    | .....uuugggcuagagaguaguccugggaug.....                                                                                 | 1     | 0   |
|    | .....uuugggcuagagaguaguccugggaugggu.....                                                                              | 1     | 0   |
|    | .....uugggcuagagaguaguccC.....                                                                                        | 2     | 1   |
|    | .....uugggcuagagaguaguccugg.....                                                                                      | 1     | 0   |
|    | .....uugggcuagagaguaguccugg.....                                                                                      | 2     | 0   |
|    | .....uugggcuagagaguaguccugggau.....                                                                                   | 1     | 0   |
|    | .....uugggcuagagaguaguccugggauggg.....                                                                                | 1     | 0   |
|    | .....uugggcuagGguaguccugggauggggug.....                                                                               | 1     | 1   |
|    | .....ggggcuagagaguaguccGg.....                                                                                        | 1     | 1   |
|    | .....ggggcuagagaguaguccugg.....                                                                                       | 1     | 0   |
|    | .....ggggcuagagaguaguccugggaugggC.....                                                                                | 1     | 1   |
|    | .....gcuagagaguaguccuggg.....                                                                                         | 1     | 0   |
|    | .....gcuagagaguaguccuggga.....                                                                                        | 4     | 0   |
|    | .....gcuagagaguaguccugggaugg.....                                                                                     | 1     | 0   |
|    | .....cuagagaguaguccuggga.....                                                                                         | 3     | 0   |
|    | .....cuagagaguaguccugggauA.....                                                                                       | 1     | 1   |
|    | .....cuagagaguaguccugggaugg.....                                                                                      | 1     | 0   |
|    | .....cuagagaguaguccugggauggC.....                                                                                     | 1     | 1   |
|    | .....cuagagaguaguccugggauggg.....                                                                                     | 1     | 0   |

## Mature

## Star

|                                                                                                                                                    |   |   |     |
|----------------------------------------------------------------------------------------------------------------------------------------------------|---|---|-----|
| uccauaguuaguuugcuugggcuagaguaguc <u>cu</u> ggggaugggugac <u>u</u> accuaggaaguccuac <u>u</u> auuuuac <u>a</u> ugccuagggaauguaauuaacuugggacuaauuuuac |   |   |     |
| .....cuagaguaguccuggggaugggu.....                                                                                                                  | 1 | 0 | seq |
| .....agaguaguccuggggaugggu.....                                                                                                                    | 1 | 0 | seq |
| .....gaguaguccuggggauggg.....                                                                                                                      | 1 | 0 | seq |
| .....gaguaguccuggggaugggu.....                                                                                                                     | 1 | 0 | seq |
| .....aguaguccuggggaugggu.....                                                                                                                      | 3 | 0 | seq |
| .....guaguccuggggaugggu.....                                                                                                                       | 2 | 0 | seq |
| .....guaguccuggggaugggug.....                                                                                                                      | 1 | 0 | seq |
| .....uaguccuggggaugggug.....                                                                                                                       | 1 | 0 | seq |
| .....cuggggaugggugacuacc.....                                                                                                                      | 1 | 0 | seq |

Provisional ID : MA\_1168899\_37313  
 Score total : 6304.4  
 Score for star read(s) : 3.9  
 Score for read counts : 6302.6  
 Score for mfe : 0.1  
 Score for randfold : -2.2  
 Score for cons. seed :  
 Total read count : 12374  
 Mature read count : 11608  
 Loop read count : 162  
 Star read count : 604

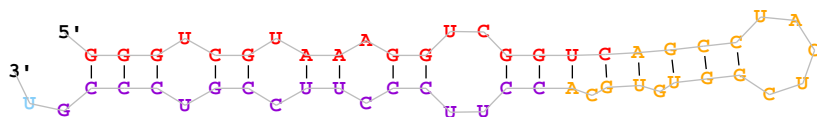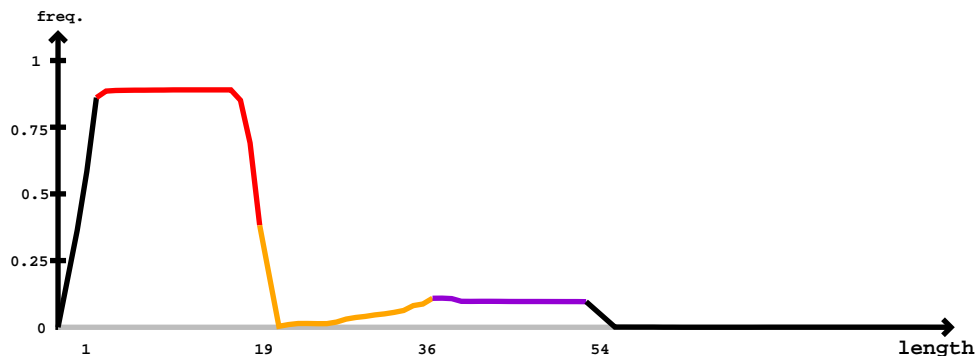

## Mature

## Star

| 5' -                                 |                                        | -3'                                    | obs   |     |        |
|--------------------------------------|----------------------------------------|----------------------------------------|-------|-----|--------|
| uugggucguaaaaggucggagccuacucggugugca | ccuucccuuccgucgccg                     | uuugcuggguggcaugcuucuggccuuaauuggcuggg |       | exp |        |
| uugggucgCaaaggucg                    | uuugcuggguggcaugcuucuggccuuaauuggcuggg |                                        | reads | nm  | sample |
| uugggucguaaUggucg                    |                                        |                                        | 2     | 1   | seq    |
| uGgggucguaaaaggucg                   |                                        |                                        | 1     | 1   | seq    |
| Cugggucguaaaaggucg                   |                                        |                                        | 1     | 1   | seq    |
| uugggucguaGaggucg                    |                                        |                                        | 1     | 1   | seq    |
| uugggucguaaGggucg                    |                                        |                                        | 1     | 1   | seq    |
| uAgggucguaaaaggucg                   |                                        |                                        | 1     | 1   | seq    |
| Augggucguaaaaggucg                   |                                        |                                        | 1     | 1   | seq    |
| uugggucguaUaggucg                    |                                        |                                        | 1     | 1   | seq    |
| uugggucguaaaaggCcg                   |                                        |                                        | 2     | 1   | seq    |
| uugggucguaaaaggucg                   |                                        |                                        | 490   | 0   | seq    |
| uugggucgGaaaggucg                    |                                        |                                        | 1     | 1   | seq    |
| uugggCcguaaaaggucg                   |                                        |                                        | 2     | 1   | seq    |
| uugggucCuaaaggucg                    |                                        |                                        | 1     | 1   | seq    |
| uugggucguaaaaggGcg                   |                                        |                                        | 2     | 1   | seq    |
| uugggucguaaGggucgg                   |                                        |                                        | 4     | 1   | seq    |
| uugggucguaaaaggAcgg                  |                                        |                                        | 1     | 1   | seq    |
| uuAgggucguaaaaggucgg                 |                                        |                                        | 4     | 1   | seq    |
| uugggucguaaaagguaAgg                 |                                        |                                        | 1     | 1   | seq    |
| uugggucguaaaaggguGgg                 |                                        |                                        | 2     | 1   | seq    |
| Gugggucguaaaaggucgg                  |                                        |                                        | 2     | 1   | seq    |
| uugggucgCaaaggucgg                   |                                        |                                        | 4     | 1   | seq    |
| uugggucguaaaaggucCg                  |                                        |                                        | 2     | 1   | seq    |
| uugggucguaaaaggCcg                   |                                        |                                        | 6     | 1   | seq    |
| uGgggucguaaaaggucgg                  |                                        |                                        | 1     | 1   | seq    |
| uugggucguaaaaggucgg                  |                                        |                                        | 1123  | 0   | seq    |
| uugggucguaGaggucgg                   |                                        |                                        | 5     | 1   | seq    |
| uugggucguGaaggucgg                   |                                        |                                        | 1     | 1   | seq    |
| Cugggucguaaaaggucgg                  |                                        |                                        | 3     | 1   | seq    |
| uugggucguaaaaggGcgg                  |                                        |                                        | 2     | 1   | seq    |
| uuggUucguaaaaggucgg                  |                                        |                                        | 1     | 1   | seq    |
| uugggucguaaaaggucG                   |                                        |                                        | 7     | 1   | seq    |
| uugggucguGaaggucgg                   |                                        |                                        | 6     | 1   | seq    |

## Mature

## Star

|                                                                                                 |      |   |     |
|-------------------------------------------------------------------------------------------------|------|---|-----|
| uuugggucguaaaaggucggucagccuacucggugugcaccuucccuccgucgccguuugcugggugcgaugcuucugggccuuaaauggcuggg |      |   |     |
| uuugggucguaaaaggucggc.....                                                                      | 255  | 1 | seq |
| uuugggucguaaaaAgucgggu.....                                                                     | 5    | 1 | seq |
| Auugggucguaaaaggucgggu.....                                                                     | 1    | 1 | seq |
| uuugggucguaaaaggucgggu.....                                                                     | 1    | 1 | seq |
| uuugggucguaaaUgucgggu.....                                                                      | 1    | 1 | seq |
| uuugggucguaGaggucgggu.....                                                                      | 5    | 1 | seq |
| uuugggucguaaGggucgggu.....                                                                      | 5    | 1 | seq |
| uuugggCcguaaaaggucgggu.....                                                                     | 6    | 1 | seq |
| uuugggAcguaaaaggucgggu.....                                                                     | 1    | 1 | seq |
| uuugggucguaaaaggAcgggu.....                                                                     | 5    | 1 | seq |
| uuCggucguaaaaggucgggu.....                                                                      | 1    | 1 | seq |
| uuugggucguaaaaggucgggu.....                                                                     | 1438 | 0 | seq |
| uuugggucguaCaggucgggu.....                                                                      | 1    | 1 | seq |
| uuugggucguaaaaggucggG.....                                                                      | 41   | 1 | seq |
| Gugggucguaaaaggucgggu.....                                                                      | 3    | 1 | seq |
| uuugggucguaaaaggucGcu.....                                                                      | 4    | 1 | seq |
| uuugggucguaUaggucgggu.....                                                                      | 2    | 1 | seq |
| uuugggGcguaaaaggucgggu.....                                                                     | 1    | 1 | seq |
| uuAgggucguaaaaggucgggu.....                                                                     | 1    | 1 | seq |
| uuaggUucguaaaaggucgggu.....                                                                     | 1    | 1 | seq |
| Cugggucguaaaaggucgggu.....                                                                      | 3    | 1 | seq |
| uAgggucguaaaaggucgggu.....                                                                      | 1    | 1 | seq |
| uuugggucguaaaaggCcggu.....                                                                      | 5    | 1 | seq |
| uCgggucguaaaaggucgggu.....                                                                      | 4    | 1 | seq |
| uuugggucguaaaaggucggA.....                                                                      | 19   | 1 | seq |
| uuugggucgCaaaggucgggu.....                                                                      | 2    | 1 | seq |
| Gugggucguaaaaggucgguc.....                                                                      | 1    | 1 | seq |
| uuugggucguaaaaggAcgguc.....                                                                     | 2    | 1 | seq |
| uuugggucguaaaaggCcggu.....                                                                      | 3    | 1 | seq |
| uuugggucguaaaaggucggGc.....                                                                     | 4    | 1 | seq |
| uuugggucguaaGggucgguc.....                                                                      | 6    | 1 | seq |
| uuugggucguaaaaggucggCc.....                                                                     | 10   | 1 | seq |
| uCgggucguaaaaggucgguc.....                                                                      | 2    | 1 | seq |
| uuugggucguaaaaggucggguG.....                                                                    | 5    | 1 | seq |
| uuugggAcguaaaaggucgguc.....                                                                     | 2    | 1 | seq |
| uuugggucguaaaaggucCgu.....                                                                      | 1    | 1 | seq |
| uuugggucguaaaaggucggguA.....                                                                    | 23   | 1 | seq |
| uuugggucguaaaaggGcggu.....                                                                      | 1    | 1 | seq |
| uuugggCcguaaaaggucgguc.....                                                                     | 5    | 1 | seq |
| Nugggucguaaaaggucgguc.....                                                                      | 2    | 1 | seq |
| uugUgucguaaaaggucgguc.....                                                                      | 1    | 1 | seq |
| uuugggucguaaaaggucggguU.....                                                                    | 74   | 1 | seq |
| Cugggucguaaaaggucgguc.....                                                                      | 6    | 1 | seq |
| uuugggucguaaaagAucgguc.....                                                                     | 1    | 1 | seq |
| uuugggucgCaaaggucgguc.....                                                                      | 4    | 1 | seq |
| uuaggUucguaaaaggucgguc.....                                                                     | 1    | 1 | seq |
| uuAgggucguaaaaggucgguc.....                                                                     | 1    | 1 | seq |
| uuugggucguGaaggucgguc.....                                                                      | 1    | 1 | seq |
| uuugggucguaaaaggucgguc.....                                                                     | 1094 | 0 | seq |
| uuugggucguaGaggucgguc.....                                                                      | 1    | 1 | seq |
| uuugggucguaaaaggucgguca.....                                                                    | 4    | 0 | seq |
| Cugggucguaaaaggucgguca.....                                                                     | 2    | 1 | seq |
| .Cgggucguaaaaggucgg.....                                                                        | 5    | 1 | seq |
| .uugggucgCaaaggucgg.....                                                                        | 1    | 1 | seq |
| .uugggucguaCaggucgg.....                                                                        | 1    | 1 | seq |
| .uugggucguaaaaggCcg.....                                                                        | 4    | 1 | seq |
| .uugggucguGaaggucgg.....                                                                        | 1    | 1 | seq |
| .uugggAcguaaaaggucgg.....                                                                       | 1    | 1 | seq |
| .uugggucguaaaagguaAgg.....                                                                      | 1    | 1 | seq |
| .Ngggucguaaaaggucgg.....                                                                        | 1    | 1 | seq |
| .Agggucguaaaaggucgg.....                                                                        | 1    | 1 | seq |
| .uugggucguaaaagUucgg.....                                                                       | 1    | 1 | seq |
| .uugggucguaaaaggucG.....                                                                        | 1    | 1 | seq |
| .uugggucguaaaaggucGC.....                                                                       | 5    | 1 | seq |
| .uugggucguaGaggucgg.....                                                                        | 1    | 1 | seq |
| .Ggggucguaaaaggucgg.....                                                                        | 1    | 1 | seq |
| .uugggucguaaaagAucgg.....                                                                       | 2    | 1 | seq |
| .uugggucguaaaaggucgg.....                                                                       | 886  | 0 | seq |
| .uugggCcguaaaaggucgg.....                                                                       | 1    | 1 | seq |
| .uugggucguaaGggucgg.....                                                                        | 6    | 1 | seq |

## Mature

## Star

uuugggucguaaaagggucggucagccuacucggugugcaacuuuccuuccgucuccguuuugcugggugggcaugcuucugggccuuaaaugggcuggg

|                             |      |   |     |
|-----------------------------|------|---|-----|
| .ugggucguaaaaggAcgg.....    | 1    | 1 | seq |
| .ugggucguaaaaggucgggu.....  | 679  | 0 | seq |
| .ugggucguaaaaggucggG.....   | 92   | 1 | seq |
| .ugggucguaaaaggucggG.....   | 18   | 1 | seq |
| .ugggucgCaaaaggucgggu.....  | 1    | 1 | seq |
| .ugggucguaaaaggucggA.....   | 5    | 1 | seq |
| .Cgggucguaaaaggucgggu.....  | 1    | 1 | seq |
| .uAgggucguaaaaggucgggu..... | 1    | 1 | seq |
| .uggguGguaaaaggucgggu.....  | 1    | 1 | seq |
| .Agggucguaaaaggucgggu.....  | 2    | 1 | seq |
| .ugggucguaaaaggGcgggu.....  | 1    | 1 | seq |
| .ugggucguAGaggucgggu.....   | 1    | 1 | seq |
| .ugggCcguaaaaaggucgggu..... | 6    | 1 | seq |
| .ugggucguaaaUgucgggu.....   | 1    | 1 | seq |
| .Ngggucguaaaaggucgggu.....  | 1    | 1 | seq |
| .uggUucguaaaaggucgggu.....  | 1    | 1 | seq |
| .ugggucguaaGggucgggu.....   | 2    | 1 | seq |
| .ugggucguaaaaggAcgggu.....  | 1    | 1 | seq |
| .ugggCcguaaaaaggucgguc..... | 1    | 1 | seq |
| .Agggucguaaaaggucgguc.....  | 1    | 1 | seq |
| .ugggAcguaaaaggucgguc.....  | 1    | 1 | seq |
| .uAgggucguaaaaggucgguc..... | 2    | 1 | seq |
| .ugggucguaaaaggucggguG..... | 5    | 1 | seq |
| .ugggucguaaaaggCcgguuc..... | 4    | 1 | seq |
| .ugggucguaaGggucgguc.....   | 5    | 1 | seq |
| .ugggucguaaaaggucggguU..... | 66   | 1 | seq |
| .Cgggucguaaaaggucgguc.....  | 5    | 1 | seq |
| .ugggucguaaaaggucggCc.....  | 12   | 1 | seq |
| .ugggucguAGaggucgguc.....   | 1    | 1 | seq |
| .ugggucguaaaUggucgguc.....  | 1    | 1 | seq |
| .ugggucguaaaaggucggguA..... | 24   | 1 | seq |
| .ugggucguaaaaggucggGc.....  | 3    | 1 | seq |
| .ugggucguaaaaggucgguc.....  | 1007 | 0 | seq |
| .ugggucguGaaggucgguc.....   | 5    | 1 | seq |
| .ugggucguaaaagAucgguc.....  | 1    | 1 | seq |
| .Ggggucguaaaaggucgguc.....  | 2    | 1 | seq |
| .ugggucguaaaaggucgguca..... | 1    | 0 | seq |
| .gggucguaaaaggucgCu.....    | 2    | 1 | seq |
| .gggucguaaaaggucggA.....    | 11   | 1 | seq |
| .gggucguaaaaggucggC.....    | 156  | 1 | seq |
| .ggguGguaaaaggucgggu.....   | 1    | 1 | seq |
| .gggucguaaaUggucgggu.....   | 1    | 1 | seq |
| .gggucguaaaaggGcgggu.....   | 3    | 1 | seq |
| .Ngguucguaaaaggucgggu.....  | 2    | 1 | seq |
| .gggucguaaaCgucgggu.....    | 1    | 1 | seq |
| .gggucguaaGggucgggu.....    | 5    | 1 | seq |
| .gggucguaaaAgucgggu.....    | 2    | 1 | seq |
| .gggucguaaaaggCcggu.....    | 4    | 1 | seq |
| .gggucguaaaaggAcgggu.....   | 3    | 1 | seq |
| .gggucgCaaaaggucgggu.....   | 2    | 1 | seq |
| .Agguucguaaaaggucgggu.....  | 2    | 1 | seq |
| .gggucguaaaaggucggG.....    | 30   | 1 | seq |
| .gggucguaaaagAucgggu.....   | 1    | 1 | seq |
| .gggucguGaaggucgggu.....    | 2    | 1 | seq |
| .gggucguAGaggucgggu.....    | 5    | 1 | seq |
| .gggucguaaaaggucgggu.....   | 1159 | 0 | seq |
| .gUgucguaaaaggucgggu.....   | 1    | 1 | seq |
| .gggCcguaaaaaggucgggu.....  | 4    | 1 | seq |
| .gggucguUaggucgguc.....     | 2    | 1 | seq |
| .gggucgCaaaaggucgguc.....   | 1    | 1 | seq |
| .gggucguGaaggucgguc.....    | 3    | 1 | seq |
| .gggAcguaaaaggucgguc.....   | 1    | 1 | seq |
| .gggCcguaaaaaggucgguc.....  | 5    | 1 | seq |
| .Cggucguaaaaggucgguc.....   | 1    | 1 | seq |
| .gggucguaaaaggucggCc.....   | 30   | 1 | seq |
| .gggucguaaaaggCcgguuc.....  | 4    | 1 | seq |
| .gggucguaaaaggucggGc.....   | 7    | 1 | seq |
| .gggucguAGaggucgguc.....    | 4    | 1 | seq |
| .gggucguaaaagAucgguc.....   | 2    | 1 | seq |
| .gggucguaaaagguGgguc.....   | 1    | 1 | seq |



## Mature

## Star

uuugggucguaaaaggucggucagccuacucggugugcaccuucccuuccgucuccguuugcuggggcaugcuucuggccuuaauuggcuggg

|                                                 |      |   |     |
|-------------------------------------------------|------|---|-----|
| . .Aggucguaaaaggucgguc . . . . .                | 4    | 1 | seq |
| . .gggucguaaaAgucgguc . . . . .                 | 2    | 1 | seq |
| . .gggucguaaaaggguAgguc . . . . .               | 1    | 1 | seq |
| . .gggucguaaaaggucgguc . . . . .                | 1943 | 0 | seq |
| . .gggucguaaaaggucgCuc . . . . .                | 1    | 1 | seq |
| . .gggucguaaaaggucggua . . . . .                | 28   | 1 | seq |
| . .gggucguaaGggucgguc . . . . .                 | 16   | 1 | seq |
| . .gggucguaaaaggucgguG . . . . .                | 9    | 1 | seq |
| . .gCgucguaaaaggucgguc . . . . .                | 1    | 1 | seq |
| . .gggucguaaaaggucggAc . . . . .                | 1    | 1 | seq |
| . .gggucguaaaaggucgguU . . . . .                | 136  | 1 | seq |
| . .Nggucguaaaaggucgguc . . . . .                | 2    | 1 | seq |
| . .gggucguCaaggucgguc . . . . .                 | 1    | 1 | seq |
| . .gggucguaaaaggucgguca . . . . .               | 4    | 0 | seq |
| . .gggucguaaaaggucggucag . . . . .              | 1    | 0 | seq |
| . . .ggucguaaGggucgguc . . . . .                | 1    | 1 | seq |
| . . .ggucguaaaaggucggGc . . . . .               | 6    | 1 | seq |
| . . .gUucguaaaaggucgguc . . . . .               | 3    | 1 | seq |
| . . .ggCguaaaaggucgguc . . . . .                | 1    | 1 | seq |
| . . .ggucguaaaaggucgguc . . . . .               | 264  | 0 | seq |
| . . .ggucguaaaaggucggua . . . . .               | 2    | 1 | seq |
| . . .ggucguaaaaggucggCc . . . . .               | 4    | 1 | seq |
| . . .ggucguaaaaggucgguG . . . . .               | 1    | 1 | seq |
| . . .Ugucguaaaaggucgguc . . . . .               | 1    | 1 | seq |
| . . .ggucguaGaggucgguc . . . . .                | 1    | 1 | seq |
| . . .ggucguaaaaggucgguU . . . . .               | 25   | 1 | seq |
| . . .ggucguaaGggucgguca . . . . .               | 1    | 1 | seq |
| . . .ggucguaaaaggucgguca . . . . .              | 9    | 0 | seq |
| . . .ggucguaaaaggucggucagc . . . . .            | 1    | 0 | seq |
| . . . .gucguaaaaggucggCc . . . . .              | 1    | 1 | seq |
| . . . .gucguaGaggucgguca . . . . .              | 1    | 1 | seq |
| . . . .gucguaaaaggucgguca . . . . .             | 23   | 0 | seq |
| . . . .gucguaaaaggucggucag . . . . .            | 3    | 0 | seq |
| . . . .gucguaaaaggucggucagccu . . . . .         | 2    | 0 | seq |
| . . . . .ucguaaaaggucggucag . . . . .           | 7    | 0 | seq |
| . . . . .ucguaaGggucggucag . . . . .            | 1    | 1 | seq |
| . . . . .cguaaaaggucggucagcc . . . . .          | 1    | 0 | seq |
| . . . . .cguaaaaggucggucagccC . . . . .         | 2    | 1 | seq |
| . . . . .cguaaaaggucggucagccu . . . . .         | 1    | 0 | seq |
| . . . . .cguaaaaggucggucagccG . . . . .         | 1    | 1 | seq |
| . . . . .cguaaaaggucggucagccua . . . . .        | 1    | 0 | seq |
| . . . . . .uaaaggucggucagccu . . . . .          | 3    | 0 | seq |
| . . . . . .uaaaggucggucagccua . . . . .         | 1    | 0 | seq |
| . . . . . .uaaaggucggucagccuaUucggu . . . . .   | 1    | 1 | seq |
| . . . . . . .aaaggucggucagccuaUu . . . . .      | 1    | 1 | seq |
| . . . . . . .aaggucggucagccuaU . . . . .        | 1    | 1 | seq |
| . . . . . . .aaggucggucagccuaUu . . . . .       | 2    | 1 | seq |
| . . . . . . .aaggucggucagccuaUuc . . . . .      | 1    | 1 | seq |
| . . . . . . .aaggucggucagccuaUucgg . . . . .    | 1    | 1 | seq |
| . . . . . . .aaggucggucagccuaUucggug . . . . .  | 2    | 1 | seq |
| . . . . . . .aaggucggucagccuaUucggugu . . . . . | 1    | 1 | seq |
| . . . . . . . .gccuaUucggugugcac . . . . .      | 1    | 1 | seq |
| . . . . . . . .gccuaUucggugugcacc . . . . .     | 4    | 1 | seq |
| . . . . . . . .gccuaUucggugugcaccu . . . . .    | 6    | 1 | seq |
| . . . . . . . .gccuaUucggugugcaccuu . . . . .   | 1    | 1 | seq |
| . . . . . . . .ccuaUucggugugcacc . . . . .      | 20   | 1 | seq |
| . . . . . . . .ccuaUucggugugcaccu . . . . .     | 75   | 1 | seq |
| . . . . . . . .ccuaUucggugugcaccuu . . . . .    | 2    | 1 | seq |
| . . . . . . . .cuaUucggugugcaccu . . . . .      | 51   | 1 | seq |
| . . . . . . . .cuaUucggugugcaccuu . . . . .     | 1    | 1 | seq |
| . . . . . . . .cuaUucggugugcaccuucc . . . . .   | 1    | 1 | seq |
| . . . . . . . .uaUucggugugcaccuu . . . . .      | 1    | 1 | seq |
| . . . . . . . .uaUucggugugcaccuucc . . . . .    | 1    | 1 | seq |
| . . . . . . . .Uucggugugcaccuucc . . . . .      | 1    | 1 | seq |
| . . . . . . . .cucggugugcaccuuccu . . . . .     | 1    | 0 | seq |
| . . . . . . . .Uucggugugcaccuuccuu . . . . .    | 1    | 1 | seq |
| . . . . . . . .Uucggugugcaccuuccuuccg . . . . . | 1    | 1 | seq |
| . . . . . . . .ucggugugcaccuucc . . . . .       | 1    | 0 | seq |
| . . . . . . . .ucggugugcaccuuccu . . . . .      | 1    | 0 | seq |
| . . . . . . . .ucggugugcaccGuccu . . . . .      | 1    | 1 | seq |

## Mature

## Star

uuugggucguaaaaggucggucagccuacucggugugcaccuucccuccgucgguuugcuggggcaugcuucugggccuuaauuggcuggg

|                                        |     |   |     |
|----------------------------------------|-----|---|-----|
| .....ucggugugcaccuCcccu.....           | 1   | 1 | seq |
| .....ucggugugcaccuCcccuucc.....        | 1   | 1 | seq |
| .....ucggugugcaccuGcccuuccgucceg.....  | 70  | 1 | seq |
| .....ucggugugcaccuGcccuuccguccecg..... | 2   | 1 | seq |
| .....ucggugugcaccuGcccuuccguccecg..... | 1   | 1 | seq |
| .....cggugugcaccuucccu.....            | 1   | 0 | seq |
| .....cggugugcaccuucccu.....            | 1   | 0 | seq |
| .....cggugugcaccuucccuuccgucceC.....   | 1   | 1 | seq |
| .....cggugugcaccuGcccuuccgucceg.....   | 137 | 1 | seq |
| .....cggugugcaccuGcccuuccguccecg.....  | 7   | 1 | seq |
| .....ggugugcaccuGcccuuccguccecg.....   | 79  | 1 | seq |
| .....ggugugcaccuGcccuuccguccecg.....   | 2   | 1 | seq |
| .....gugugcaccuCcccuuccg.....          | 1   | 1 | seq |
| .....gugugcaccuGcccuuccguccecg.....    | 50  | 1 | seq |
| .....gugugcaccuGcccuuccguccecg.....    | 2   | 1 | seq |
| .....ugugcaccuucccuuccgucce.....       | 1   | 0 | seq |
| .....ugugcaccuCcccuuccgucce.....       | 3   | 1 | seq |
| .....ugugcaccuGcccuuccguccecg.....     | 68  | 1 | seq |
| .....ugugcaccuGcccuuccguccecg.....     | 1   | 1 | seq |
| .....gugcaccuucccuuccgucce.....        | 1   | 0 | seq |
| .....gugcaccuGcccuuccguccecg.....      | 49  | 1 | seq |
| .....gugcaccuGcccuuccguccecg.....      | 2   | 1 | seq |
| .....ugcaccuGcccuuccguccecg.....       | 72  | 1 | seq |
| .....ugcaccuGcccuuccguccecg.....       | 2   | 1 | seq |
| .....ugcaccuGcccuuccguccecg.....       | 1   | 1 | seq |
| .....gcaccuucccuuccgucceU.....         | 1   | 1 | seq |
| .....gcaccuGcccuuccguccecg.....        | 94  | 1 | seq |
| .....gcaccuGcccuuccguccecg.....        | 1   | 1 | seq |
| .....caccuucccuuccgucce.....           | 1   | 0 | seq |
| .....caccuGcccuuccguccecg.....         | 228 | 1 | seq |
| .....caccuGcccuuccguccecg.....         | 6   | 1 | seq |
| .....caccuGcccuuccguccecg.....         | 2   | 1 | seq |
| .....accuGcccuuccguccecg.....          | 76  | 1 | seq |
| .....accuGcccuuccguccecg.....          | 3   | 1 | seq |
| .....ccuGcccuuccguccecg.....           | 271 | 1 | seq |
| .....ccuAcccuuccguccecg.....           | 1   | 1 | seq |
| .....ccuGcccuuccguccecg.....           | 7   | 1 | seq |
| .....ccuGcccuuccguccecg.....           | 1   | 1 | seq |
| .....cuGcccuuccguccecg.....            | 4   | 1 | seq |
| .....cuGcccuuccguccecg.....            | 1   | 1 | seq |
| .....cuGcccuuccguccecg.....            | 1   | 1 | seq |
| .....uGcccuuccguccecg.....             | 2   | 1 | seq |
| .....cccuuccgucceUuuugcug.....         | 1   | 1 | seq |
| .....ccuuccgucceUuuugcug.....          | 2   | 1 | seq |
| .....ccuuccgucceUuuugcug.....          | 1   | 1 | seq |
| .....ccuuccgucceUuuugcug.....          | 1   | 1 | seq |
| .....cuuccgucceUuuugcug.....           | 2   | 1 | seq |
| .....ccgucceUuuugcug.....              | 1   | 1 | seq |
| .....Ncuggccuuaauuggc.....             | 1   | 1 | seq |
| .....cuggccuuaauuggc.....              | 1   | 0 | seq |
| .....uggccuuaaCuggcuggg                | 1   | 1 | seq |

[illegible]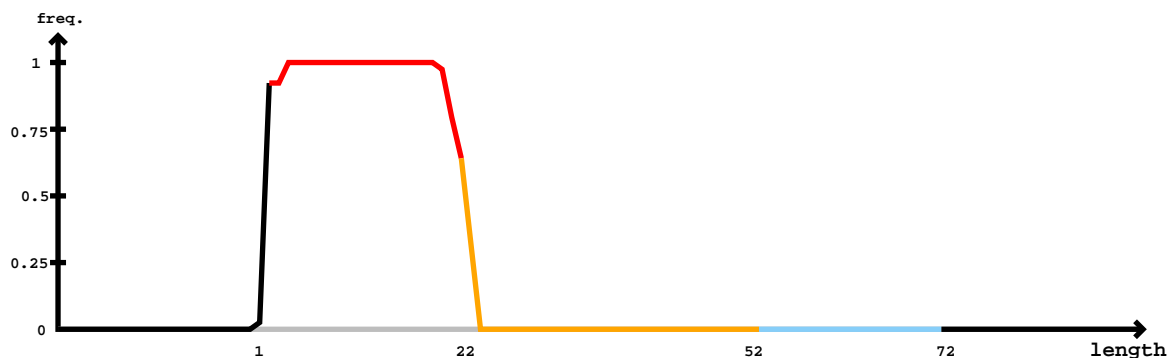

Star

[illegible]

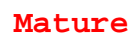[illegible]





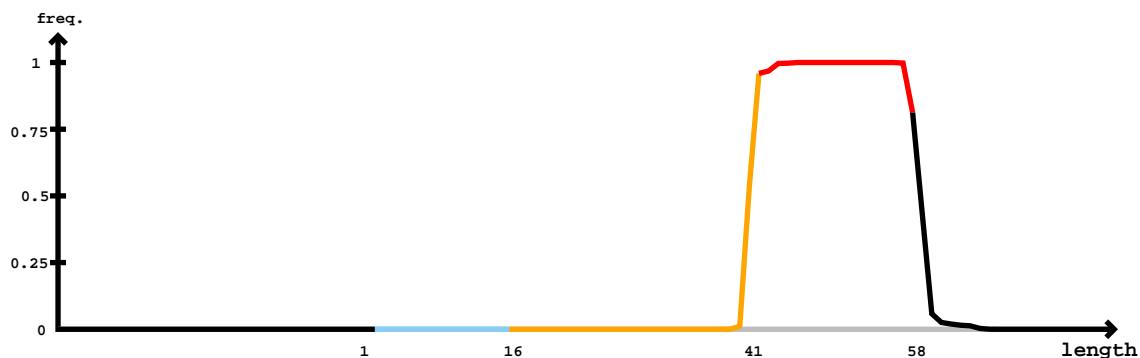

## Mature

[illegible]

## Star

## Mature

uuuuuugaggccaugcucagagagagcccuagucuaauuuucugugacugaauagucuuuuuugacuaauuguuuuugcucugaauacauuugggaugggguuucagauccau

|                               |      |   |     |
|-------------------------------|------|---|-----|
| .....uuauGUCUGAUAUACAUU.....  | 1    | 1 | seq |
| .....uuauGUCUGGAUAUACAUU..... | 1    | 1 | seq |
| .....GUAUGCUCUGAUAUACAUU..... | 2    | 1 | seq |
| .....uuauGUCUGAUAUACAUU.....  | 7    | 1 | seq |
| .....uuauGUCUGAUAUACAUU.....  | 2    | 1 | seq |
| .....uuauGUCUGAUAUACAUU.....  | 7    | 1 | seq |
| .....NUAUGCUCUGAUAUACAUU..... | 5    | 1 | seq |
| .....uuauGUCUGAUAUACAUU.....  | 2    | 1 | seq |
| .....uuauGUCUGAUAUACAUU.....  | 1    | 1 | seq |
| .....uuauACUCUGAUAUACAUU..... | 2    | 1 | seq |
| .....uuauGUCUGAUAUACAUU.....  | 3    | 1 | seq |
| .....AUAUGCUCUGAUAUACAUU..... | 2    | 1 | seq |
| .....uuauGUCUGAUAUACAUU.....  | 1    | 1 | seq |
| .....uuauGUCUGAUAUACAUU.....  | 1    | 1 | seq |
| .....uuauGUCUGAUAUACAUU.....  | 9    | 1 | seq |
| .....uuauGUCUGAUAUACAUU.....  | 6    | 1 | seq |
| .....uuauGUCUGAUAUACAUU.....  | 1    | 1 | seq |
| .....uuauGUCUGAUAUACAUU.....  | 190  | 1 | seq |
| .....uuauGUCUGAUAUACAUU.....  | 9    | 1 | seq |
| .....uuauGUCUGAUAUACAUU.....  | 1    | 1 | seq |
| .....uuauGUCUGAUAUACAUU.....  | 3    | 1 | seq |
| .....uuauGUCUGAUAUACAUU.....  | 6    | 0 | seq |
| .....uuauGUCUGAUAUACAUU.....  | 2    | 1 | seq |
| .....uuauGUCUGAUAUACAUU.....  | 1    | 1 | seq |
| .....uuauGUCUGAUAUACAUU.....  | 10   | 0 | seq |
| .....uuauGUCUGAUAUACAUU.....  | 10   | 1 | seq |
| .....uuauGUCUGAUAUACAUU.....  | 1    | 1 | seq |
| .....uuauGUCUGAUAUACAUU.....  | 2    | 1 | seq |
| .....uuauGUCUGAUAUACAUU.....  | 2    | 1 | seq |
| .....uuauGUCUGAUAUACAUU.....  | 8    | 1 | seq |
| .....uuauGUCUGAUAUACAUU.....  | 1    | 1 | seq |
| .....uuauGUCUGAUAUACAUU.....  | 2    | 1 | seq |
| .....uuauGUCUGAUAUACAUU.....  | 2    | 1 | seq |
| .....uuauGUCUGAUAUACAUU.....  | 1    | 1 | seq |
| .....uuauGUCUGAUAUACAUU.....  | 2    | 1 | seq |
| .....uuauGUCUGAUAUACAUU.....  | 2272 | 0 | seq |
| .....uuauGUCUGAUAUACAUU.....  | 1    | 1 | seq |
| .....uuauGUCUGAUAUACAUU.....  | 207  | 1 | seq |
| .....uuauGUCUGAUAUACAUU.....  | 5    | 1 | seq |
| .....uuauGUCUGAUAUACAUU.....  | 11   | 1 | seq |
| .....uuauGUCUGAUAUACAUU.....  | 1    | 1 | seq |
| .....uuauGUCUGAUAUACAUU.....  | 2    | 1 | seq |
| .....uuauGUCUGAUAUACAUU.....  | 2    | 1 | seq |
| .....uuauGUCUGAUAUACAUU.....  | 2    | 1 | seq |
| .....uuauGUCUGAUAUACAUU.....  | 1    | 1 | seq |
| .....uuauGUCUGAUAUACAUU.....  | 7    | 1 | seq |
| .....uuauGUCUGAUAUACAUU.....  | 2    | 1 | seq |
| .....uuauGUCUGAUAUACAUU.....  | 2    | 1 | seq |
| .....uuauGUCUGAUAUACAUU.....  | 3    | 1 | seq |
| .....uuauGUCUGAUAUACAUU.....  | 5    | 1 | seq |
| .....uuauGUCUGAUAUACAUU.....  | 6    | 1 | seq |
| .....uuauGUCUGAUAUACAUU.....  | 2    | 1 | seq |
| .....uuauGUCUGAUAUACAUU.....  | 1    | 1 | seq |
| .....uuauGUCUGAUAUACAUU.....  | 2    | 1 | seq |
| .....uuauGUCUGAUAUACAUU.....  | 5    | 1 | seq |
| .....uuauGUCUGAUAUACAUU.....  | 1    | 1 | seq |
| .....uuauGUCUGAUAUACAUU.....  | 1    | 1 | seq |
| .....uuauGUCUGAUAUACAUU.....  | 3    | 0 | seq |
| .....uuauGUCUGAUAUACAUU.....  | 1    | 1 | seq |
| .....uuauGUCUGAUAUACAUU.....  | 2    | 1 | seq |
| .....uuauGUCUGAUAUACAUU.....  | 2    | 1 | seq |
| .....uuauGUCUGAUAUACAUU.....  | 7    | 1 | seq |
| .....uuauGUCUGAUAUACAUU.....  | 6    | 1 | seq |
| .....uuauGUCUGAUAUACAUU.....  | 4    | 1 | seq |
| .....uuauGUCUGAUAUACAUU.....  | 1    | 1 | seq |
| .....uuauGUCUGAUAUACAUU.....  | 3    | 1 | seq |



Star

## Mature

uuguuugaggccaugcucagagagcccuagucuauuuucugugacugaauagucauuuuugacuaauuguuaugcucugaauacaugggauggguuucagauccau

|                                      |    |   |     |
|--------------------------------------|----|---|-----|
| .....uagcucugaaauacaauuggCauggg..... | 1  | 1 | seq |
| .....augcucugaaauacaauug.....        | 9  | 0 | seq |
| .....augcucugaaauacaauAg.....        | 2  | 1 | seq |
| .....augcucugaaauacaauuC.....        | 1  | 1 | seq |
| .....augcucugaaauacaauugA.....       | 1  | 1 | seq |
| .....Nugcucugaaauacaauugg.....       | 1  | 1 | seq |
| .....augcucugaaauacaauuUg.....       | 5  | 1 | seq |
| .....augcucugaaauacaauugg.....       | 12 | 0 | seq |
| .....augcucugaaauacaauuggC.....      | 5  | 1 | seq |
| .....augcucugaaauacaauuggCa.....     | 8  | 1 | seq |
| .....augcucugaaauacaauuAggau.....    | 1  | 1 | seq |
| .....augcucugaaauacaauuggCau.....    | 1  | 1 | seq |
| .....augcucugaaauacaauuggCaug.....   | 8  | 1 | seq |
| .....augcucugaaauacaauuggCaugg.....  | 1  | 1 | seq |
| .....ugcucugaaauacaauuCg.....        | 3  | 1 | seq |
| .....ugcucugaaauacaauuUg.....        | 26 | 1 | seq |
| .....ugcucugaaauacaauugA.....        | 5  | 1 | seq |
| .....Cgcucugaaauacaauugg.....        | 1  | 1 | seq |
| .....ugcucugaaauacaauugg.....        | 69 | 0 | seq |
| .....ugcucugaaauacaauuggC.....       | 10 | 1 | seq |
| .....ugcucugaaauacaauuggCa.....      | 10 | 1 | seq |
| .....ugcucugaaauacaauuggCau.....     | 1  | 1 | seq |
| .....ugcucugaaauacaauuAggau.....     | 1  | 1 | seq |
| .....ugcucugaaauacaauuggCaug.....    | 39 | 1 | seq |
| .....ugcucugaaauacaauuggCaugg.....   | 8  | 1 | seq |
| .....gcucugaaauacaauuggC.....        | 2  | 1 | seq |
| .....gcucugaaauacaauuggCa.....       | 3  | 1 | seq |
| .....gcucugaaauacaauuggCaug.....     | 1  | 1 | seq |
| .....gcucugaaauacaauuggCaugg.....    | 1  | 1 | seq |
| .....cucugaaauacaauuAggau.....       | 2  | 1 | seq |
| .....cucugaaauacaauuggCau.....       | 1  | 1 | seq |
| .....cucugaaauacaauuggCaug.....      | 9  | 1 | seq |
| .....cucugaaauacaauuggCaugg.....     | 4  | 1 | seq |

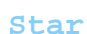[illegible]

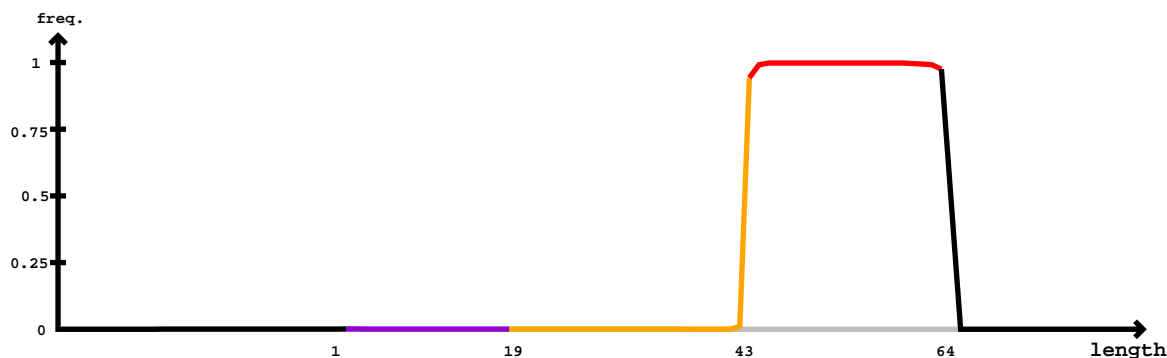

## Mature

| 5' -                                                                                                                                     | -3'   | obs |        |
|------------------------------------------------------------------------------------------------------------------------------------------|-------|-----|--------|
|                                                                                                                                          | exp   |     |        |
| gaauuugcuucagaucuaguuugaauaugugggau <u>cu</u> aagauguguaugcuguagaauguuaggcaguu <u>uu</u> cuuuuagaucugaaaa <u>cu</u> gaauguuauagaucugcugu |       |     |        |
| gaauuugcuucagaucuaguuugaauaugugggau <u>cu</u> aagauguguaugcuguagaauguuaggcaguu <u>uu</u> cuuuuagaucugaaaa <u>cu</u> gaauguuauagaucugcugu |       |     |        |
| .....(((.((((((((.....(((((((((((((((((((((((.(.(((.....)).)).)))..))))))))))))....)).))))).))))))))....))                               | reads | mm  | sample |
| .....uAagaucuaguuugaauaug.....                                                                                                           | 1     | 1   | seq    |
| .....uguggaucGaaagaugug.....                                                                                                             | 1     | 1   | seq    |
| .....augcuguagaCuguuuu.....                                                                                                              | 1     | 1   | seq    |
| .....Auucuuuagaucugaaaa <u>c</u> .....                                                                                                   | 1     | 1   | seq    |
| .....Auucuuuagaucugaaaa <u>cug</u> .....                                                                                                 | 16    | 1   | seq    |
| .....uucuuuagaucugaaaa.....                                                                                                              | 3     | 0   | seq    |
| .....uucuuuagaucugaaaa <u>c</u> .....                                                                                                    | 1     | 0   | seq    |
| .....uucuuuagaucugaaaa <u>cC</u> .....                                                                                                   | 1     | 1   | seq    |
| .....Gucuuuagaucugaaaa <u>cu</u> .....                                                                                                   | 1     | 1   | seq    |
| .....uucuuuagaucugaaaa <u>cu</u> .....                                                                                                   | 1     | 0   | seq    |
| .....uucuuuagaucugaaaa <u>cug</u> .....                                                                                                  | 9     | 0   | seq    |
| .....uucuuuagaucugaaaa <u>cugU</u> .....                                                                                                 | 149   | 1   | seq    |
| .....uucuuuagaucugaaaa <u>cuga</u> .....                                                                                                 | 19    | 0   | seq    |
| .....uucuuuagaucugaaaa <u>cugC</u> .....                                                                                                 | 1270  | 1   | seq    |
| .....uuc <u>C</u> uuagaucugaaaa <u>cuga</u> .....                                                                                        | 1     | 1   | seq    |
| .....uucuuCagaucugaaaa <u>cuga</u> .....                                                                                                 | 1     | 1   | seq    |
| .....ucuuuagaucugaaaa <u>c</u> .....                                                                                                     | 1     | 0   | seq    |
| .....ucuuuagaucugaaaa <u>cu</u> .....                                                                                                    | 1     | 0   | seq    |
| .....ucuuuagaucugaaaa <u>cug</u> .....                                                                                                   | 1     | 0   | seq    |
| .....ucuuuagaucugaaaa <u>cuga</u> .....                                                                                                  | 1     | 0   | seq    |
| .....ucuuuagaucugaaaa <u>cugC</u> .....                                                                                                  | 61    | 1   | seq    |
| .....ucuuuagaucugaaaa <u>cugU</u> .....                                                                                                  | 11    | 1   | seq    |
| .....cuuuuagaucugaaaa <u>cugC</u> .....                                                                                                  | 10    | 1   | seq    |

Provisional ID : MA\_12306\_7547  
 Score total : 1.8  
 Score for star read(s) : -1.3  
 Score for read counts : 0  
 Score for mfe : 1.5  
 Score for randfold : 1.6  
 Score for cons. seed :  
 Total read count : 1169  
 Mature read count : 1169  
 Loop read count : 0  
 Star read count : 0

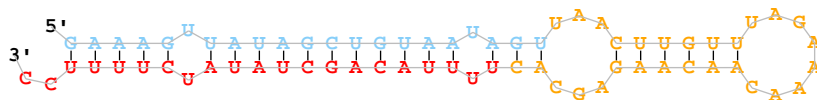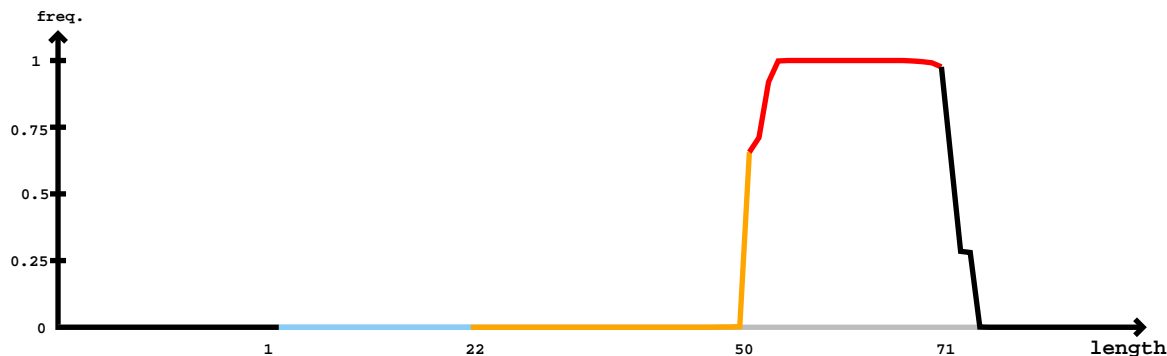

Star

Mature

| 5'    | caucgguaaacugcaagaaga | gaaguuuauagcuguaauaguuaacuuguuuagaaaaacaacaagagcacuuuuacagcuauaucuuuuccaucuagcucuuuacugcua | -3'   | exp |        |
|-------|-----------------------|--------------------------------------------------------------------------------------------|-------|-----|--------|
| ...   | (((                   | (((                                                                                        | reads | mm  | sample |
| ..... | .....                 | .....                                                                                      | 1     | 0   | seq    |
| ..... | .....                 | .....                                                                                      | 1     | 0   | seq    |
| ..... | .....                 | .....                                                                                      | 1     | 0   | seq    |
| ..... | .....                 | .....                                                                                      | 2     | 0   | seq    |
| ..... | .....                 | .....                                                                                      | 2     | 0   | seq    |
| ..... | .....                 | .....                                                                                      | 3     | 0   | seq    |
| ..... | .....                 | .....                                                                                      | 13    | 0   | seq    |
| ..... | .....                 | .....                                                                                      | 1     | 1   | seq    |
| ..... | .....                 | .....                                                                                      | 4     | 1   | seq    |
| ..... | .....                 | .....                                                                                      | 5     | 1   | seq    |
| ..... | .....                 | .....                                                                                      | 2     | 1   | seq    |
| ..... | .....                 | .....                                                                                      | 1     | 1   | seq    |
| ..... | .....                 | .....                                                                                      | 6     | 1   | seq    |
| ..... | .....                 | .....                                                                                      | 4     | 1   | seq    |
| ..... | .....                 | .....                                                                                      | 2     | 1   | seq    |
| ..... | .....                 | .....                                                                                      | 2     | 1   | seq    |
| ..... | .....                 | .....                                                                                      | 4     | 1   | seq    |
| ..... | .....                 | .....                                                                                      | 1     | 1   | seq    |
| ..... | .....                 | .....                                                                                      | 1     | 1   | seq    |
| ..... | .....                 | .....                                                                                      | 46    | 1   | seq    |
| ..... | .....                 | .....                                                                                      | 2     | 1   | seq    |
| ..... | .....                 | .....                                                                                      | 24    | 1   | seq    |
| ..... | .....                 | .....                                                                                      | 1     | 1   | seq    |
| ..... | .....                 | .....                                                                                      | 5     | 1   | seq    |
| ..... | .....                 | .....                                                                                      | 618   | 0   | seq    |
| ..... | .....                 | .....                                                                                      | 1     | 1   | seq    |
| ..... | .....                 | .....                                                                                      | 1     | 1   | seq    |
| ..... | .....                 | .....                                                                                      | 1     | 1   | seq    |
| ..... | .....                 | .....                                                                                      | 1     | 1   | seq    |
| ..... | .....                 | .....                                                                                      | 1     | 1   | seq    |
| ..... | .....                 | .....                                                                                      | 3     | 1   | seq    |
| ..... | .....                 | .....                                                                                      | 2     | 1   | seq    |
| ..... | .....                 | .....                                                                                      | 1     | 1   | seq    |
| ..... | .....                 | .....                                                                                      | 2     | 0   | seq    |

## Star

## Mature

|                                                                                                                    |     |   |     |
|--------------------------------------------------------------------------------------------------------------------|-----|---|-----|
| caucgguaaacugcaagaagagaaaguuauagcuguaauaguuuacuuuuuagaaaacaacaagagacacuuuuuacagcuauauucuuuuuccaucuagcucauuuacugcua |     |   |     |
| .....uuuuacagcuauauucuuuuuccauc.....                                                                               | 2   | 0 | seq |
| .....uuuuacagcuauauucuuuuuccauU.....                                                                               | 1   | 1 | seq |
| .....uuuacagcuauauucuuuuA.....                                                                                     | 1   | 1 | seq |
| .....uuuacagcuauauucuuuuc.....                                                                                     | 2   | 0 | seq |
| .....uuuacagcuauauucuuuucc.....                                                                                    | 14  | 0 | seq |
| .....uuuacCgcuauauucuuuucc.....                                                                                    | 2   | 1 | seq |
| .....uuuacagcuauauucuuuucU.....                                                                                    | 1   | 1 | seq |
| .....uuuacUgcuauauucuuuucca.....                                                                                   | 11  | 1 | seq |
| .....uuuacagcuauauGuuuucca.....                                                                                    | 1   | 1 | seq |
| .....uuuacagcuauauucuuuuccU.....                                                                                   | 1   | 1 | seq |
| .....uuuacagcuauauucuuuucca.....                                                                                   | 26  | 0 | seq |
| .....uuuacagcuauauucuuuuccG.....                                                                                   | 3   | 1 | seq |
| .....uuuacagcuauauucuuuuccau.....                                                                                  | 1   | 0 | seq |
| .....uuuacagcuauauucuuuuccauU.....                                                                                 | 1   | 1 | seq |
| .....uuacagcuauauucuuuuc.....                                                                                      | 1   | 0 | seq |
| .....uuacagcuauauucuuuucc.....                                                                                     | 4   | 0 | seq |
| .....uuacagcuauauucuuuucca.....                                                                                    | 4   | 0 | seq |
| .....uuacagcuauauucuuuuccau.....                                                                                   | 3   | 0 | seq |
| .....uuacagcuauauucuuuuccaC.....                                                                                   | 1   | 1 | seq |
| .....Guacagcuauauucuuuuccauc.....                                                                                  | 1   | 1 | seq |
| .....uuacagcuauauucuuuuccauA.....                                                                                  | 2   | 1 | seq |
| .....uuacagcuauauucuuuuccauc.....                                                                                  | 1   | 1 | seq |
| .....uuacagcuauaCcuuuccauc.....                                                                                    | 1   | 1 | seq |
| .....uuacagcuauauucuuuuccauU.....                                                                                  | 9   | 1 | seq |
| .....uuacagcuauauucuuuuccauc.....                                                                                  | 213 | 0 | seq |
| .....uuacagcCauauucuuuuccauc.....                                                                                  | 1   | 1 | seq |
| .....uuacagcuauGucuuuccauc.....                                                                                    | 1   | 1 | seq |
| .....uuacagcuauauucuuuuccaCc.....                                                                                  | 2   | 1 | seq |
| .....uacagcuauauucuuuucU.....                                                                                      | 1   | 1 | seq |
| .....uacagcuauauucuuuuccauU.....                                                                                   | 4   | 1 | seq |
| .....uacagcuauauucuuuuccauc.....                                                                                   | 82  | 0 | seq |
| .....uacagcuauauucuuuuccaCc.....                                                                                   | 1   | 1 | seq |
| .....uacagUauauucuuuuccauc.....                                                                                    | 1   | 1 | seq |
| .....uacagcuauauucuuuuccauA.....                                                                                   | 2   | 1 | seq |
| .....uacagcuauauucuuuuccaucu.....                                                                                  | 1   | 0 | seq |
| .....acagcuauauucuuuuccauc.....                                                                                    | 1   | 0 | seq |
| .....acagcuauauucuuuuccauU.....                                                                                    | 1   | 1 | seq |



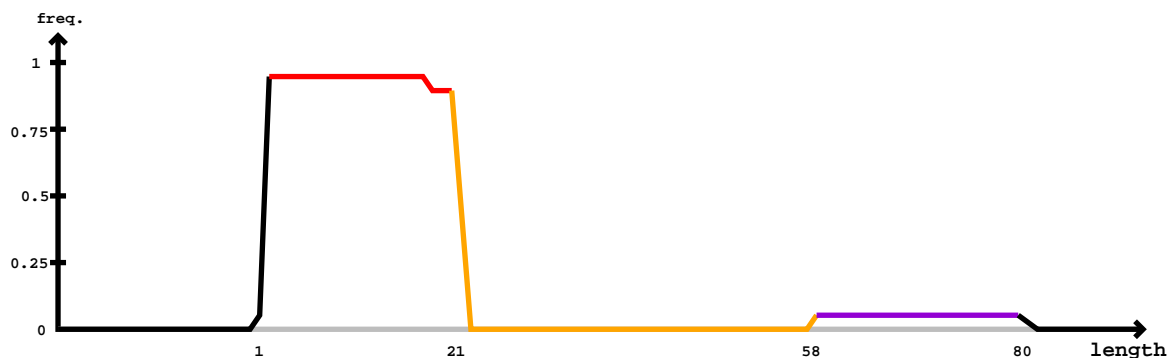

Star

[illegible]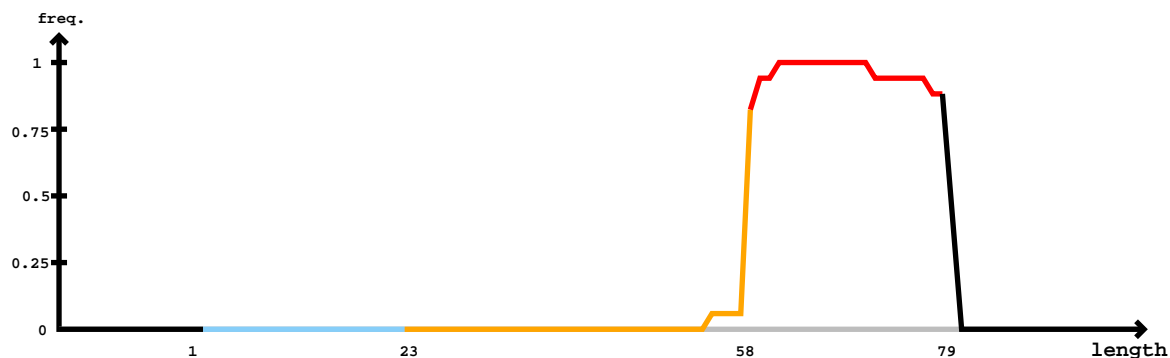

## Mature



[illegible]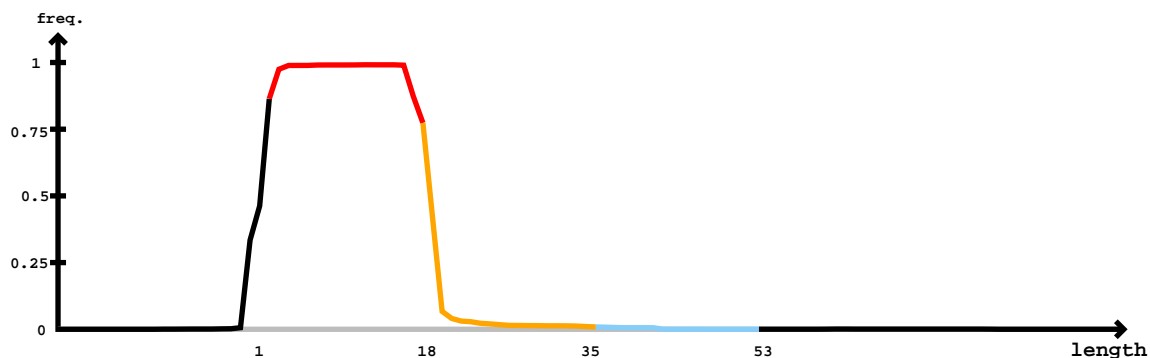

Star

[illegible]

## Mature

## Star

aauguuccaugugaaaaucacuuggacauggguuagucccauccuaagagauggggaauccuuguaucaaggguuacucugcaugaacauccgaaagauaauuggguuuaa

|                                                                          |     |   |     |
|--------------------------------------------------------------------------|-----|---|-----|
| .....ca <u>CA</u> u <u>gg</u> gacau <u>gg</u> guua.....                  | 1   | 1 | seq |
| .....cacu <u>gg</u> gacau <u>gg</u> guuag.....                           | 320 | 0 | seq |
| .....Nac <u>u</u> u <u>gg</u> gacau <u>gg</u> guuag.....                 | 1   | 1 | seq |
| .....cacu <u>gg</u> gacau <u>gg</u> guuaA.....                           | 3   | 1 | seq |
| .....Gac <u>u</u> u <u>gg</u> gacau <u>gg</u> guuag.....                 | 1   | 1 | seq |
| .....cacu <u>gg</u> gacau <u>gg</u> Uuuag.....                           | 1   | 1 | seq |
| .....cacu <u>gg</u> gacau <u>gg</u> gAag.....                            | 1   | 1 | seq |
| .....cac <u>U</u> u <u>gg</u> gacau <u>gg</u> guuag.....                 | 1   | 1 | seq |
| .....cacuG <u>g</u> gacau <u>gg</u> guuag.....                           | 1   | 1 | seq |
| .....cacu <u>gg</u> gacau <u>gg</u> gCag.....                            | 1   | 1 | seq |
| .....cacu <u>gg</u> gacG <u>u</u> ggguuag.....                           | 1   | 1 | seq |
| .....cacu <u>gg</u> gacA <u>g</u> ggguuag.....                           | 1   | 1 | seq |
| .....cacu <u>gg</u> gacau <u>gg</u> guuaU.....                           | 1   | 1 | seq |
| .....cacu <u>gg</u> gacau <u>gg</u> gGuagu.....                          | 1   | 1 | seq |
| .....cacu <u>gg</u> gacau <u>gg</u> gAuagu.....                          | 1   | 1 | seq |
| .....cacu <u>gg</u> gacau <u>gg</u> guuagA.....                          | 1   | 1 | seq |
| .....cac <u>U</u> u <u>gg</u> gacau <u>gg</u> guuagu.....                | 2   | 1 | seq |
| .....cacu <u>gg</u> gacA <u>g</u> ggguuagu.....                          | 1   | 1 | seq |
| .....cacuG <u>g</u> gacau <u>gg</u> guuagu.....                          | 1   | 1 | seq |
| .....cacu <u>gg</u> gacau <u>gg</u> gCuagu.....                          | 1   | 1 | seq |
| .....cacu <u>gg</u> gacau <u>gg</u> gGuagu.....                          | 1   | 1 | seq |
| .....cacu <u>gg</u> gacau <u>gg</u> guuagG.....                          | 8   | 1 | seq |
| .....cacu <u>gg</u> gacau <u>gg</u> guuagC.....                          | 56  | 1 | seq |
| .....cacu <u>gg</u> gacG <u>u</u> ggguuagu.....                          | 2   | 1 | seq |
| .....cacu <u>gg</u> gacau <u>gg</u> guuagu.....                          | 364 | 0 | seq |
| .....cacu <u>gg</u> gacau <u>gg</u> gCagu.....                           | 1   | 1 | seq |
| .....cacu <u>gg</u> gacA <u>g</u> ggguuaguc.....                         | 1   | 1 | seq |
| .....cacu <u>gg</u> gacau <u>gg</u> guuagAc.....                         | 1   | 1 | seq |
| .....cU <u>u</u> u <u>gg</u> gacau <u>gg</u> guuaguc.....                | 2   | 1 | seq |
| .....cacu <u>gg</u> gacau <u>gg</u> guuaguc.....                         | 195 | 0 | seq |
| .....cacuG <u>g</u> gacau <u>gg</u> guuaguc.....                         | 1   | 1 | seq |
| .....cacu <u>gg</u> GCau <u>gg</u> guuaguc.....                          | 1   | 1 | seq |
| .....cacu <u>gg</u> gacau <u>gg</u> guuagCc.....                         | 2   | 1 | seq |
| .....cacu <u>gg</u> gacau <u>gg</u> guuGguc.....                         | 1   | 1 | seq |
| .....cacu <u>gg</u> gacau <u>gg</u> guuagucc.....                        | 6   | 0 | seq |
| .....cacu <u>gg</u> gacau <u>gg</u> guuagucU.....                        | 10  | 1 | seq |
| .....cacu <u>gg</u> gacau <u>gg</u> gCuagucc.....                        | 1   | 1 | seq |
| .....cacu <u>gg</u> gacau <u>gg</u> guuaguccU.....                       | 1   | 1 | seq |
| .....cacu <u>gg</u> gacau <u>gg</u> guuagucca.....                       | 10  | 0 | seq |
| .....cacu <u>gg</u> gacau <u>gg</u> guuGagucca.....                      | 1   | 1 | seq |
| .....cacu <u>gg</u> gacau <u>gg</u> guuaguccCu.....                      | 1   | 1 | seq |
| .....cacu <u>gg</u> gacau <u>gg</u> guuagucUauc.....                     | 2   | 1 | seq |
| .....cacu <u>gg</u> gacau <u>gg</u> guuagucUaucc.....                    | 1   | 1 | seq |
| .....cacu <u>gg</u> gacau <u>gg</u> guuagucUauccu.....                   | 1   | 1 | seq |
| .....cacu <u>gg</u> gacau <u>gg</u> guuagucUauccua.....                  | 2   | 1 | seq |
| .....cacu <u>gg</u> gacau <u>gg</u> guuagucUauccuaagagau <u>gg</u> ..... | 1   | 1 | seq |
| .....acu <u>gg</u> gacau <u>gg</u> gCag.....                             | 1   | 1 | seq |
| .....acG <u>u</u> u <u>gg</u> gacau <u>gg</u> guuag.....                 | 1   | 1 | seq |
| .....acu <u>gg</u> gacau <u>gg</u> guuaA.....                            | 7   | 1 | seq |
| .....acu <u>gg</u> gacau <u>gg</u> guuaU.....                            | 1   | 1 | seq |
| .....Ncu <u>gg</u> gacau <u>gg</u> guuag.....                            | 1   | 1 | seq |
| .....acu <u>gg</u> gacau <u>gg</u> guuag.....                            | 128 | 0 | seq |
| .....acu <u>gg</u> gacau <u>g</u> Uguuag.....                            | 1   | 1 | seq |
| .....acu <u>gg</u> U <u>ca</u> u <u>gg</u> guuag.....                    | 1   | 1 | seq |
| .....acu <u>gg</u> gacA <u>g</u> ggguuagu.....                           | 1   | 1 | seq |
| .....acu <u>gg</u> gacau <u>gg</u> guuagA.....                           | 2   | 1 | seq |
| .....acu <u>gg</u> gacau <u>gg</u> guua <u>lu</u> .....                  | 1   | 1 | seq |
| .....acuG <u>g</u> gacau <u>gg</u> guuagu.....                           | 1   | 1 | seq |
| .....acu <u>gg</u> gacau <u>gg</u> guuagC.....                           | 35  | 1 | seq |
| .....acu <u>gg</u> gacau <u>gg</u> guuagu.....                           | 245 | 0 | seq |
| .....acu <u>gg</u> gacG <u>u</u> ggguuagu.....                           | 1   | 1 | seq |
| .....acu <u>gg</u> gacau <u>gg</u> gCuagu.....                           | 1   | 1 | seq |
| .....acA <u>u</u> u <u>gg</u> gacau <u>gg</u> guuagu.....                | 1   | 1 | seq |
| .....acu <u>gg</u> gacau <u>gg</u> guuagG.....                           | 5   | 1 | seq |
| .....C <u>cu</u> u <u>gg</u> gacau <u>gg</u> guuagu.....                 | 1   | 1 | seq |
| .....G <u>cu</u> u <u>gg</u> gacau <u>gg</u> guuagu.....                 | 1   | 1 | seq |
| .....acu <u>gg</u> gacau <u>gg</u> guuagCc.....                          | 3   | 1 | seq |
| .....acu <u>gg</u> gacau <u>gg</u> Uuuaguc.....                          | 1   | 1 | seq |
| .....acu <u>gg</u> gacau <u>gg</u> guuaguc.....                          | 152 | 0 | seq |
| .....ac <u>U</u> u <u>gg</u> gacau <u>gg</u> guuaguc.....                | 1   | 1 | seq |
| .....acu <u>gg</u> gacauU <u>g</u> guuaguc.....                          | 1   | 1 | seq |

## Mature

## Star

|                                                                                                                                                                      |     |   |     |
|----------------------------------------------------------------------------------------------------------------------------------------------------------------------|-----|---|-----|
| aauguuccaugugaaaauca <u>cuuggacau</u> ggguuagucc <u>cauccua</u> agagau <u>gggga</u> auccuugua <u>ucaaggg</u> uguacucugcaugaacauccgaaagauaa <u>uu</u> ggguu <u>aa</u> |     |   |     |
| .....acuuggacGuggguuaguc.....                                                                                                                                        | 1   | 1 | seq |
| .....acAuggacau <u>ggguu</u> aguc.....                                                                                                                               | 1   | 1 | seq |
| .....acuuggacau <u>ggguu</u> agGc.....                                                                                                                               | 1   | 1 | seq |
| .....acuuggacau <u>ggguu</u> agucc.....                                                                                                                              | 3   | 0 | seq |
| .....acuuggacau <u>ggguu</u> agucU.....                                                                                                                              | 8   | 1 | seq |
| .....acuuggacau <u>ggguu</u> agucca.....                                                                                                                             | 2   | 0 | seq |
| .....acuuggacau <u>ggguu</u> agucUauccuaagag.....                                                                                                                    | 1   | 1 | seq |
| .....acuuggacau <u>ggguu</u> agucUauccuaagagau <u>ggg</u> .....                                                                                                      | 1   | 1 | seq |
| .....cuuggacau <u>gggu</u> Cagu.....                                                                                                                                 | 1   | 1 | seq |
| .....cuuggacau <u>ggg</u> Cuagu.....                                                                                                                                 | 3   | 1 | seq |
| .....cuuggacau <u>ggguu</u> Ggu.....                                                                                                                                 | 3   | 1 | seq |
| .....cuuggacau <u>ggguu</u> agG.....                                                                                                                                 | 24  | 1 | seq |
| .....cuCggacau <u>ggguu</u> agu.....                                                                                                                                 | 1   | 1 | seq |
| .....cuuggacauAgguuagu.....                                                                                                                                          | 2   | 1 | seq |
| .....cuuggacau <u>ggg</u> Auagu.....                                                                                                                                 | 1   | 1 | seq |
| .....cuugAacau <u>ggguu</u> agu.....                                                                                                                                 | 1   | 1 | seq |
| .....cuuggacau <u>ggguu</u> agC.....                                                                                                                                 | 143 | 1 | seq |
| .....cuuggacGuggguuaguc.....                                                                                                                                         | 3   | 1 | seq |
| .....cuuggacau <u>ggguu</u> agu.....                                                                                                                                 | 872 | 0 | seq |
| .....cuGggacau <u>ggguu</u> agu.....                                                                                                                                 | 1   | 1 | seq |
| .....cuuggUc <u>au</u> ggguuagu.....                                                                                                                                 | 1   | 1 | seq |
| .....cuuggacau <u>ggguu</u> agA.....                                                                                                                                 | 6   | 1 | seq |
| .....cuuggacauGAguuaguc.....                                                                                                                                         | 1   | 1 | seq |
| .....cuuggacauAgguuaguc.....                                                                                                                                         | 1   | 1 | seq |
| .....cuuggacau <u>ggU</u> uaguc.....                                                                                                                                 | 1   | 1 | seq |
| .....cuuggacau <u>ggg</u> Cuaguc.....                                                                                                                                | 1   | 1 | seq |
| .....cuuggacau <u>ggguu</u> aguc.....                                                                                                                                | 702 | 0 | seq |
| .....cuuggacau <u>gggu</u> Caguc.....                                                                                                                                | 1   | 1 | seq |
| .....cuAggacau <u>ggguu</u> aguc.....                                                                                                                                | 1   | 1 | seq |
| .....cuuggacGuggguuaguc.....                                                                                                                                         | 1   | 1 | seq |
| .....cuuggacau <u>ggguu</u> agCc.....                                                                                                                                | 8   | 1 | seq |
| .....Nuuggacau <u>ggguu</u> aguc.....                                                                                                                                | 3   | 1 | seq |
| .....cuuggacau <u>ggg</u> G <u>u</u> aguc.....                                                                                                                       | 1   | 1 | seq |
| .....cuuggacauG <u>u</u> uaguc.....                                                                                                                                  | 1   | 1 | seq |
| .....cuuggacau <u>ggguu</u> agGc.....                                                                                                                                | 2   | 1 | seq |
| .....cuuggacaA <u>ggguu</u> aguc.....                                                                                                                                | 2   | 1 | seq |
| .....cuCggacau <u>ggguu</u> aguc.....                                                                                                                                | 5   | 1 | seq |
| .....cCuggacau <u>ggguu</u> aguc.....                                                                                                                                | 1   | 1 | seq |
| .....cuuggacau <u>ggguu</u> agucU.....                                                                                                                               | 28  | 1 | seq |
| .....cuuggacau <u>ggguu</u> agucc.....                                                                                                                               | 26  | 0 | seq |
| .....cuuggacau <u>ggguu</u> agCcc.....                                                                                                                               | 1   | 1 | seq |
| .....cuuggacau <u>ggguu</u> aguUc.....                                                                                                                               | 1   | 1 | seq |
| .....cuuggacau <u>ggguu</u> aguccG.....                                                                                                                              | 1   | 1 | seq |
| .....cuuggacau <u>ggguu</u> agucca.....                                                                                                                              | 16  | 0 | seq |
| .....cuuggacau <u>ggguu</u> agucUa.....                                                                                                                              | 3   | 1 | seq |
| .....cuuggacau <u>ggguu</u> aguccC.....                                                                                                                              | 2   | 1 | seq |
| .....cuuggacau <u>ggguu</u> Guucca.....                                                                                                                              | 1   | 1 | seq |
| .....cuuggacau <u>ggguu</u> agucUau.....                                                                                                                             | 5   | 1 | seq |
| .....cuuggacau <u>ggguu</u> aguccCu.....                                                                                                                             | 1   | 1 | seq |
| .....cuuggacau <u>ggguu</u> aguccauc.....                                                                                                                            | 4   | 0 | seq |
| .....cuuggacau <u>ggguu</u> agucUauc.....                                                                                                                            | 6   | 1 | seq |
| .....cuuggacau <u>ggguu</u> aguccaCc.....                                                                                                                            | 1   | 1 | seq |
| .....cuuggacau <u>ggguu</u> aguccauc.....                                                                                                                            | 2   | 0 | seq |
| .....cuuggacau <u>ggguu</u> agucUaucc.....                                                                                                                           | 1   | 1 | seq |
| .....cuuggacau <u>ggguu</u> aguccauc <u>cu</u> .....                                                                                                                 | 3   | 0 | seq |
| .....cuuggacau <u>ggguu</u> agucUauccu.....                                                                                                                          | 5   | 1 | seq |
| .....cuuggacau <u>ggguu</u> aguccauc <u>ua</u> .....                                                                                                                 | 1   | 0 | seq |
| .....cuuggacau <u>ggguu</u> agucUauccua.....                                                                                                                         | 3   | 1 | seq |
| .....cuuggacau <u>ggguu</u> agucUauccuaagagau <u>g</u> .....                                                                                                         | 1   | 1 | seq |
| .....cuuggacau <u>ggguu</u> aguccaucuaagagau <u>gg</u> .....                                                                                                         | 2   | 0 | seq |
| .....cuuggacau <u>ggguu</u> agucUauccuaagagau <u>gg</u> .....                                                                                                        | 2   | 1 | seq |
| .....cuuggacau <u>ggguu</u> agucUauccuaagagau <u>ggg</u> .....                                                                                                       | 2   | 1 | seq |
| .....cuuggacau <u>ggguu</u> aguccaucuaagagau <u>gggga</u> .....                                                                                                      | 1   | 0 | seq |
| .....uuggacauU <u>ggguu</u> aguc.....                                                                                                                                | 1   | 1 | seq |
| .....Guggacau <u>ggguu</u> aguc.....                                                                                                                                 | 1   | 1 | seq |
| .....Cuggacau <u>ggguu</u> aguc.....                                                                                                                                 | 5   | 1 | seq |
| .....uuggacGuggguuaguc.....                                                                                                                                          | 2   | 1 | seq |
| .....uuggacau <u>ggg</u> Cuaguc.....                                                                                                                                 | 1   | 1 | seq |
| .....uuggacau <u>ggguu</u> Gguc.....                                                                                                                                 | 1   | 1 | seq |

## Mature

## Star

|                                                                                                                    |     |   |     |
|--------------------------------------------------------------------------------------------------------------------|-----|---|-----|
| aauguuccaugugaaaaucacuuggacauuggguuagucccauccuaagagauuggggaauccuuguaucaggguacuacucugcaugaacauccgaaagauaaauuggguuaa |     |   |     |
| . . . . . Auggacauuggguuaguc . . . . .                                                                             | 1   | 1 | seq |
| . . . . . uuggacauuggguuaguc . . . . .                                                                             | 452 | 0 | seq |
| . . . . . uuuggUcauggguuaguc . . . . .                                                                             | 1   | 1 | seq |
| . . . . . uuggacauuggguuagCc . . . . .                                                                             | 6   | 1 | seq |
| . . . . . uuggacauuggguCaguc . . . . .                                                                             | 1   | 1 | seq |
| . . . . . uuggacauugUguuaguc . . . . .                                                                             | 1   | 1 | seq |
| . . . . . uuAgacauuggguuagucc . . . . .                                                                            | 1   | 1 | seq |
| . . . . . uuggacauuggguuaguUc . . . . .                                                                            | 2   | 1 | seq |
| . . . . . uuggacauuggguuagucc . . . . .                                                                            | 17  | 0 | seq |
| . . . . . uuggacauuggguuagucca . . . . .                                                                           | 4   | 0 | seq |
| . . . . . uuggacauuggguuagucUau . . . . .                                                                          | 6   | 1 | seq |
| . . . . . uuggacauuggguuagucUauc . . . . .                                                                         | 8   | 1 | seq |
| . . . . . uuggacauuggguuaguccauc . . . . .                                                                         | 1   | 0 | seq |
| . . . . . uuggacauuggguuagucUaucc . . . . .                                                                        | 7   | 1 | seq |
| . . . . . uuggacauuggguuagucUauccu . . . . .                                                                       | 5   | 1 | seq |
| . . . . . uuggacauuggguuagucUauccua . . . . .                                                                      | 1   | 1 | seq |
| . . . . . uuggacauuggguuagucUauccuaaga . . . . .                                                                   | 1   | 1 | seq |
| . . . . . uuggacauuggguuagucccauccuaagagau . . . . .                                                               | 1   | 0 | seq |
| . . . . . uggacauuggguuagucc . . . . .                                                                             | 22  | 0 | seq |
| . . . . . Gggacauuggguuagucca . . . . .                                                                            | 1   | 1 | seq |
| . . . . . uggacauuggguuagucca . . . . .                                                                            | 8   | 0 | seq |
| . . . . . uggacauAgguuagucca . . . . .                                                                             | 1   | 1 | seq |
| . . . . . uggacauuggguuagucUau . . . . .                                                                           | 2   | 1 | seq |
| . . . . . uggacauuggguuaguccau . . . . .                                                                           | 1   | 0 | seq |
| . . . . . uggacauuggguuagucUauc . . . . .                                                                          | 9   | 1 | seq |
| . . . . . uggacauuggguuaguccauc . . . . .                                                                          | 1   | 0 | seq |
| . . . . . uggacauuggguuagucUaucc . . . . .                                                                         | 2   | 1 | seq |
| . . . . . uggacauuggguuaguccauc . . . . .                                                                          | 1   | 0 | seq |
| . . . . . uggacauuggguuagucUauccu . . . . .                                                                        | 4   | 1 | seq |
| . . . . . uggacauuggguuagucUauccua . . . . .                                                                       | 5   | 1 | seq |
| . . . . . uggacauuggguuaguccaucua . . . . .                                                                        | 1   | 0 | seq |
| . . . . . uggacauuggguuagucUauccuaa . . . . .                                                                      | 1   | 1 | seq |
| . . . . . uggacauuggguuagucUauccuaag . . . . .                                                                     | 2   | 1 | seq |
| . . . . . uggacauuggguuagucUauccuaagag . . . . .                                                                   | 2   | 1 | seq |
| . . . . . uggacauuggguuagucUauccuaagagau . . . . .                                                                 | 4   | 1 | seq |
| . . . . . uggacauuggguuagucccauccuaagagau . . . . .                                                                | 1   | 0 | seq |
| . . . . . ggacauuggguuaguccGuc . . . . .                                                                           | 1   | 1 | seq |
| . . . . . acauggguuaguccauc . . . . .                                                                              | 3   | 0 | seq |
| . . . . . acauggguuaguccauU . . . . .                                                                              | 1   | 1 | seq |
| . . . . . acauggguuaguccauc . . . . .                                                                              | 1   | 0 | seq |
| . . . . . acauggguuagucUauccuaagagau . . . . .                                                                     | 1   | 1 | seq |
| . . . . . acauggguuagucUauccuaagagau . . . . .                                                                     | 1   | 1 | seq |
| . . . . . cauggguuaguccauc . . . . .                                                                               | 2   | 0 | seq |
| . . . . . uggguuaguccaucuaagagau . . . . .                                                                         | 1   | 0 | seq |
| . . . . . gggguuagucUauccuaagagau . . . . .                                                                        | 1   | 1 | seq |
| . . . . . gguuaguccaucuaagagau . . . . .                                                                           | 2   | 0 | seq |
| . . . . . gguuaguccaucuaagagau . . . . .                                                                           | 1   | 0 | seq |
| . . . . . guuagucUauccuaagagau . . . . .                                                                           | 1   | 1 | seq |
| . . . . . uagucUauccuaagagau . . . . .                                                                             | 1   | 1 | seq |
| . . . . . auccuaagagau . . . . .                                                                                   | 2   | 0 | seq |
| . . . . . auccuaagagau . . . . .                                                                                   | 1   | 1 | seq |
| . . . . . uccuaagagau . . . . .                                                                                    | 2   | 0 | seq |
| . . . . . uccuaagagau . . . . .                                                                                    | 3   | 1 | seq |
| . . . . . ccuaagagau . . . . .                                                                                     | 5   | 1 | seq |
| . . . . . cuaagagau . . . . .                                                                                      | 1   | 1 | seq |
| . . . . . cuaagagau . . . . .                                                                                      | 8   | 1 | seq |
| . . . . . uaagagau . . . . .                                                                                       | 3   | 1 | seq |
| . . . . . uaagagau . . . . .                                                                                       | 1   | 1 | seq |
| . . . . . uaagagau . . . . .                                                                                       | 1   | 1 | seq |
| . . . . . uaagagau . . . . .                                                                                       | 1   | 1 | seq |
| . . . . . uaagagau . . . . .                                                                                       | 1   | 1 | seq |
| . . . . . aagagau . . . . .                                                                                        | 4   | 1 | seq |
| . . . . . aucaUggguuacucug . . . . .                                                                               | 1   | 1 | seq |
| . . . . . cugcGugaacau . . . . .                                                                                   | 1   | 1 | seq |
| . . . . . ugcGugaacau . . . . .                                                                                    | 2   | 1 | seq |

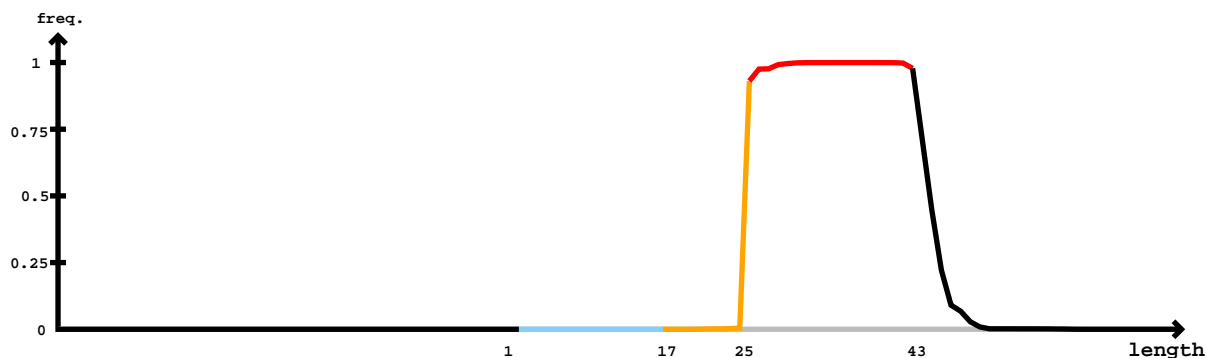

| 5' -                                                                                                 | -3'   | exp       |
|------------------------------------------------------------------------------------------------------|-------|-----------|
| .((( (((((((((.....(((.....))).....((((((( (((((((((.....)))))).))..))))).-))))))))) (((.....))).... | reads | mm sample |
| ... .Aaacuuggggauguagcucaca. ....                                                                    | 1     | 1 seq     |
| ... aaUuuuggggauguagcuc. ....                                                                        | 1     | 1 seq     |
| ... .aacuuUgggauguagcuca. ....                                                                       | 1     | 1 seq     |
| ... .aacuCggggauguagcucac. ....                                                                      | 1     | 1 seq     |
| ... .aacuuUgggauguagcucaca. ....                                                                     | 2     | 1 seq     |
| ... .aacuCggggauguagcucaca. ....                                                                     | 3     | 1 seq     |
| ... .aacuuggggauguagcucacG. ....                                                                     | 1     | 1 seq     |
| ... .aaAuuggggauguagcucaca. ....                                                                     | 2     | 1 seq     |
| ... .aacuCggggauguagcucacaug. ....                                                                   | 4     | 1 seq     |
| ... .aaGuuggggauguagcucacauggua. ....                                                                | 2     | 1 seq     |
| ... .aacuCggggauguagcucacauggua. ....                                                                | 1     | 1 seq     |
| ... .aacuCggggauguagcucacaugguagag. ....                                                             | 1     | 1 seq     |
| ... .aacuuggggauguagcucacaugguagagCgcucgcuuu. ....                                                   | 1     | 1 seq     |
| ... .aacuCggggauguagcucacaugguagagugcucgcuuu. ....                                                   | 1     | 1 seq     |
| ... .acuuggggauguagcuca. ....                                                                        | 2     | 0 seq     |
| ... .acuCggggauguagcuca. ....                                                                        | 1     | 1 seq     |
| ... .acuuggggauguagcucaca. ....                                                                      | 3     | 0 seq     |
| ... .acuugUggauguagcucaca. ....                                                                      | 1     | 1 seq     |
| ... .aGuuggggauguagcucacaug. ....                                                                    | 1     | 1 seq     |
| ... .acuuggggauguagcucacaug. ....                                                                    | 1     | 0 seq     |
| ... .acuugUggauguagcucacaug. ....                                                                    | 1     | 1 seq     |
| ... .acuugUggauguagcucacaugg. ....                                                                   | 1     | 1 seq     |
| ... .acuuggggauguagcucacauggC. ....                                                                  | 1     | 1 seq     |
| ... .acuuggggauguagcucacauggu. ....                                                                  | 1     | 0 seq     |
| ... .acuuggggauguagcucacaugguagagCg. ....                                                            | 1     | 1 seq     |
| ... .acuuggggauguagcucacaugguagagCgcucgcu. ....                                                      | 2     | 1 seq     |
| ... .acuuggggauguagcucacaugguagagCgcucgcuu. ....                                                     | 5     | 1 seq     |
| ... .aUuuggggauguagcucacaugguagagugcucgcuuu. ....                                                    | 1     | 1 seq     |
| ... .acuuggggauguagcucacaugguagagCgcucgcuuu. ....                                                    | 5     | 1 seq     |
| ... .cuuUgggauguagcuca. ....                                                                         | 1     | 1 seq     |
| ... .cuuggggauguagcuca. ....                                                                         | 3     | 0 seq     |
| ... .cuugUggauguagcucaca. ....                                                                       | 2     | 1 seq     |
| ... .cuugUggauguagcucacaug. ....                                                                     | 1     | 1 seq     |
| ... .cuuggggauguagcucacaug. ....                                                                     | 1     | 0 seq     |

# Star Mature

uggcuuuuuacugagcaaccacccgucacaaagacuacucugaaauuuagugagcaacccccgucacaaacuuugggggauguagcucacauaggugagugcucgcuuugcaugcgggag

|                                                |      |   |     |
|------------------------------------------------|------|---|-----|
| .....Guugggggauguagcucacau.....                | 1    | 1 | seq |
| .....cuugUgggauguagcucacauagg.....             | 1    | 1 | seq |
| .....Auugggggauguagcucacauaggugagugcucgcu..... | 1    | 1 | seq |
| .....uugggggauguagcucacG.....                  | 1    | 1 | seq |
| .....uugggggauguGgcucaca.....                  | 1    | 1 | seq |
| .....uugggggauguagcucaca.....                  | 17   | 0 | seq |
| .....uGgggggauguagcucaca.....                  | 2    | 1 | seq |
| .....uugggggauguagcucacGug.....                | 1    | 1 | seq |
| .....uugggggauguagcucacacG.....                | 1    | 1 | seq |
| .....uugggggaCguagcucacau.....                 | 1    | 1 | seq |
| .....uugggggauguagcucacau.....                 | 5    | 0 | seq |
| .....uugggggauguagcucacauC.....                | 1    | 1 | seq |
| .....uugggggauguagcucacacGg.....               | 1    | 1 | seq |
| .....uugggggauguagcucacacGgu.....              | 1    | 1 | seq |
| .....uugggggauguagcucacauaggC.....             | 1    | 1 | seq |
| .....uugggggauguagcucacauugUua.....            | 1    | 1 | seq |
| .....uugggggauguagcucacauaggugagugcucg.....    | 1    | 0 | seq |
| .....uugggggauguagcucacauaggugagCgcucgcuu..... | 1    | 1 | seq |
| .....uugggggauguagcucacau.....                 | 1    | 1 | seq |
| .....Aggggggauguagcucaca.....                  | 2    | 1 | seq |
| .....Ggggggauguagcucaca.....                   | 1    | 1 | seq |
| .....ugUgggauguagcucaca.....                   | 1    | 1 | seq |
| .....uugggggauguagcucaca.....                  | 25   | 0 | seq |
| .....uugggggaugCagcucacau.....                 | 1    | 1 | seq |
| .....Ggggggauguagcucacau.....                  | 2    | 1 | seq |
| .....uugggggauguagcucacau.....                 | 1    | 1 | seq |
| .....uugggggauguagcucacau.....                 | 9    | 0 | seq |
| .....uugggggauguagcucacGug.....                | 1    | 1 | seq |
| .....uugggggauguagcucacauagg.....              | 2    | 0 | seq |
| .....uugggggauguagcucacauaggC.....             | 1    | 1 | seq |
| .....uugggggauguagcucacauugUu.....             | 4    | 1 | seq |
| .....uugggggaugAagcucacauagggu.....            | 1    | 1 | seq |
| .....uugggggauguagcucacauagggu.....            | 1    | 0 | seq |
| .....Aggggggauguagcucacauaggua.....            | 1    | 1 | seq |
| .....uugggggauguagcucacauaggua.....            | 3    | 0 | seq |
| .....Ggggggauguagcucacauaggua.....             | 1    | 1 | seq |
| .....Aggggggauguagcucacauaggua.....            | 1    | 1 | seq |
| .....uugggggauguagcucacauaggua.....            | 1    | 0 | seq |
| .....uugggggauguagcucacauaggugagugcucgcu.....  | 1    | 0 | seq |
| .....uugggggaugCagcucacauaggugagugcucgcuu..... | 1    | 1 | seq |
| .....gggggauguagcucacaA.....                   | 19   | 1 | seq |
| .....gggggauguagcucacau.....                   | 1    | 1 | seq |
| .....gggggaCguagcucacau.....                   | 3    | 1 | seq |
| .....gggggauguagcucacGau.....                  | 12   | 1 | seq |
| .....gggggauguagcucacacG.....                  | 25   | 1 | seq |
| .....gggggauguagcucacCu.....                   | 8    | 1 | seq |
| .....gUgggauguagcucacau.....                   | 1    | 1 | seq |
| .....gggggaAguagcucacau.....                   | 1    | 1 | seq |
| .....gggggauguagcucUcau.....                   | 1    | 1 | seq |
| .....gggggauguagcucacau.....                   | 548  | 0 | seq |
| .....gggggauguagcCcau.....                     | 3    | 1 | seq |
| .....gggggauguagcucacGu.....                   | 114  | 1 | seq |
| .....gggggauguagcucacUu.....                   | 1    | 1 | seq |
| .....gggggauguagcucUcaug.....                  | 2    | 1 | seq |
| .....gggggaugGagcucacau.....                   | 1    | 1 | seq |
| .....gggggauguagcucacacGg.....                 | 39   | 1 | seq |
| .....gUgggauguagcucacau.....                   | 6    | 1 | seq |
| .....gggggauguagcucacauC.....                  | 32   | 1 | seq |
| .....gggggauguagcucacUug.....                  | 4    | 1 | seq |
| .....gggggauguagcucacGug.....                  | 1295 | 1 | seq |
| .....ggAgauguagcucacau.....                    | 9    | 1 | seq |
| .....gggggauguagcucacacG.....                  | 994  | 1 | seq |
| .....gggggaCguagcucacau.....                   | 15   | 1 | seq |
| .....gggggauguagcucGcaug.....                  | 27   | 1 | seq |
| .....gggggauguagcucCcaug.....                  | 2    | 1 | seq |
| .....Nggggauguagcucacau.....                   | 12   | 1 | seq |
| .....gggggaugAagcucacau.....                   | 5    | 1 | seq |
| .....gggggaAguagcucacau.....                   | 1    | 1 | seq |
| .....gggggauguagcucacau.....                   | 1    | 1 | seq |
| .....gggggauguagcucacauA.....                  | 417  | 1 | seq |

# Star Mature

uggcauuuuacugagcaaccacccgucacaagacuacucugaauuuagugagcaacccccgucacaaacugggggauguagcucacaugguagagugcucgcuuugcaugcgggag

|                                   |      |   |     |
|-----------------------------------|------|---|-----|
| .....gggggauguagcucacCug.....     | 16   | 1 | seq |
| .....gggggauguagcCcacaug.....     | 35   | 1 | seq |
| .....gggggauguaAucacacaug.....    | 11   | 1 | seq |
| .....gggggauguagcAcacaug.....     | 3    | 1 | seq |
| .....gggggauguagcuGacaug.....     | 3    | 1 | seq |
| .....Cggggauguagcucacacaug.....   | 5    | 1 | seq |
| .....gggggaGguagcucacacaug.....   | 3    | 1 | seq |
| .....gggggauguGgcucacacaug.....   | 35   | 1 | seq |
| .....gggggauguUgcucacacaug.....   | 4    | 1 | seq |
| .....gggggauguagcuUacaug.....     | 5    | 1 | seq |
| .....gggggauguagcucacaAg.....     | 18   | 1 | seq |
| .....gggUauguagcucacacaug.....    | 3    | 1 | seq |
| .....gggggauguagcuAacaug.....     | 3    | 1 | seq |
| .....gggggUuguagcucacacaug.....   | 1    | 1 | seq |
| .....gggggauguagcucacacaug.....   | 9353 | 0 | seq |
| .....gggggaugCagcucacacaug.....   | 12   | 1 | seq |
| .....gggggauguagAucacacaug.....   | 2    | 1 | seq |
| .....gggggauguagcucacacuU.....    | 39   | 1 | seq |
| .....gggggauguagUucacacaug.....   | 13   | 1 | seq |
| .....gggggauUuagcucacacaug.....   | 3    | 1 | seq |
| .....gggggauguagGucacacaug.....   | 1    | 1 | seq |
| .....gggAauguagcucacacaug.....    | 2    | 1 | seq |
| .....gggggauguagcucGcaugg.....    | 16   | 1 | seq |
| .....gggggauguagcucacaAgg.....    | 1    | 1 | seq |
| .....gggggauguagcucacacaugU.....  | 99   | 1 | seq |
| .....gggggauguagcCcacaugg.....    | 12   | 1 | seq |
| .....gggggaugAagcucacacaug.....   | 6    | 1 | seq |
| .....gggggauguagcucacGugg.....    | 232  | 1 | seq |
| .....gggggauguagcucCcaugg.....    | 2    | 1 | seq |
| .....ggggCuguagcucacacaug.....    | 1    | 1 | seq |
| .....gggggauguagcucacacuAg.....   | 24   | 1 | seq |
| .....gggggauguagcucacCugg.....    | 1    | 1 | seq |
| .....gggggauguagcucacacuUg.....   | 28   | 1 | seq |
| .....gggggauguagcucacUugg.....    | 3    | 1 | seq |
| .....Cggggauguagcucacacaugg.....  | 2    | 1 | seq |
| .....gggggauguagcuUacacaug.....   | 2    | 1 | seq |
| .....gggggauguagcucacacaugC.....  | 51   | 1 | seq |
| .....gggUauguagcucacacaugg.....   | 3    | 1 | seq |
| .....gggggauguaAucacacaugg.....   | 8    | 1 | seq |
| .....gCgggauguagcucacacaugg.....  | 3    | 1 | seq |
| .....gggggauguUgcucacacaugg.....  | 4    | 1 | seq |
| .....gggggauguagcucacacaugg.....  | 5383 | 0 | seq |
| .....gggggauguagcucacacuCg.....   | 2    | 1 | seq |
| .....gggggUuguagcucacacaugg.....  | 2    | 1 | seq |
| .....gggggauguagcAcacacaugg.....  | 2    | 1 | seq |
| .....gggggauguagGucacacaugg.....  | 2    | 1 | seq |
| .....gggggaCguagcucacacaugg.....  | 15   | 1 | seq |
| .....gggggauguagcucUcacaugg.....  | 3    | 1 | seq |
| .....gggggauguaCcucacacaugg.....  | 2    | 1 | seq |
| .....gggggaugCagcucacacaugg.....  | 7    | 1 | seq |
| .....gggAauguagcucacacaugg.....   | 4    | 1 | seq |
| .....gggggauguagcucacaGgg.....    | 13   | 1 | seq |
| .....ggAauguagcucacacaugg.....    | 2    | 1 | seq |
| .....Nggggauguagcucacacaugg.....  | 7    | 1 | seq |
| .....gggggauUuagcucacacaugg.....  | 2    | 1 | seq |
| .....gggggauguagUucacacaugg.....  | 9    | 1 | seq |
| .....gggggauguGgcucacacaugg.....  | 14   | 1 | seq |
| .....gggggauguagcucacaCgg.....    | 460  | 1 | seq |
| .....gggggauguagcugGacacaugg..... | 1    | 1 | seq |
| .....gggAauguagcucacacauggu.....  | 1    | 1 | seq |
| .....gggggauguagcucacacaugUu..... | 6    | 1 | seq |
| .....gggggauguagcucacacauAgu..... | 7    | 1 | seq |
| .....gggggauguaCcucacacauggu..... | 1    | 1 | seq |
| .....gggggauguagcucacacauggu..... | 5727 | 0 | seq |
| .....gggggauguagcucacaCggu.....   | 284  | 1 | seq |
| .....gggggauguagcCcacauggu.....   | 19   | 1 | seq |
| .....gggUauguagcucacacauggu.....  | 1    | 1 | seq |
| .....gggggauguagcUacacauggu.....  | 3    | 1 | seq |
| .....gggggauguagcucacCuggu.....   | 2    | 1 | seq |
| .....ggAauguagcucacacauggu.....   | 6    | 1 | seq |

Star

Mature

|                                                                                                                                                                                            |      |   |     |
|--------------------------------------------------------------------------------------------------------------------------------------------------------------------------------------------|------|---|-----|
| uggc <u>auuuu</u> acugagcaaccacccgucacaa <u>gac</u> uacucugaa <u>uuu</u> <u>ag</u> ugagcaacccccgu <u>caca</u> acu <u>ggggga</u> uag <u>agc</u> u <u>caca</u> ggguagagugcucgcuuugcaugcgggag |      |   |     |
| .....gggggaugagcucacau <u>gg</u> C.....                                                                                                                                                    | 1021 | 1 | seq |
| .....ggggauUuagcucacau <u>gg</u> .....                                                                                                                                                     | 6    | 1 | seq |
| .....gggggaugCagcucacau <u>gg</u> .....                                                                                                                                                    | 9    | 1 | seq |
| .....gggggaugagcUGacau <u>gg</u> .....                                                                                                                                                     | 1    | 1 | seq |
| .....gggggaugagcucacG <u>u</u> gg.....                                                                                                                                                     | 198  | 1 | seq |
| .....gggggaugagcucGca <u>u</u> gg.....                                                                                                                                                     | 18   | 1 | seq |
| .....gggggaugagUucacau <u>gg</u> .....                                                                                                                                                     | 8    | 1 | seq |
| .....Ngggaugagcucacau <u>gg</u> .....                                                                                                                                                      | 8    | 1 | seq |
| .....gggggauguUgcucacau <u>gg</u> .....                                                                                                                                                    | 2    | 1 | seq |
| .....ggggga <u>Ag</u> agcucacau <u>gg</u> .....                                                                                                                                            | 1    | 1 | seq |
| .....gggggauguGgcucacau <u>gg</u> .....                                                                                                                                                    | 13   | 1 | seq |
| .....gggggaug <u>Ag</u> agcucacau <u>gg</u> .....                                                                                                                                          | 1    | 1 | seq |
| .....gUgggaugagcucacau <u>gg</u> .....                                                                                                                                                     | 4    | 1 | seq |
| .....gggggaCguagcucacau <u>gg</u> .....                                                                                                                                                    | 13   | 1 | seq |
| .....gggggaugagcucUca <u>u</u> gg.....                                                                                                                                                     | 3    | 1 | seq |
| .....gggggaugGagcucacau <u>gg</u> .....                                                                                                                                                    | 1    | 1 | seq |
| .....gggggaugagcucacauC <u>g</u> .....                                                                                                                                                     | 1    | 1 | seq |
| .....gggggaugag <u>Ag</u> acacau <u>gg</u> .....                                                                                                                                           | 4    | 1 | seq |
| .....gggggaugagcucacaG <u>g</u> .....                                                                                                                                                      | 4    | 1 | seq |
| .....gggggaugagcucacau <u>gg</u> G.....                                                                                                                                                    | 192  | 1 | seq |
| .....gggggaugagcucacU <u>g</u> gg.....                                                                                                                                                     | 3    | 1 | seq |
| .....gggggaugagc <u>Ag</u> acacau <u>gg</u> .....                                                                                                                                          | 4    | 1 | seq |
| .....ggUgaugagcucacau <u>gg</u> .....                                                                                                                                                      | 2    | 1 | seq |
| .....gggggaugagcucacau <u>gg</u> <u>Ag</u> .....                                                                                                                                           | 101  | 1 | seq |
| .....gggggaugagcucacauG <u>u</u> .....                                                                                                                                                     | 9    | 1 | seq |
| .....gggggaUCuagcucacau <u>gg</u> .....                                                                                                                                                    | 1    | 1 | seq |
| .....gggggaGguagcucacau <u>gg</u> .....                                                                                                                                                    | 1    | 1 | seq |
| .....gggggaugagcucaca <u>Ag</u> gg.....                                                                                                                                                    | 1    | 1 | seq |
| .....gggggaugagGucacau <u>gg</u> .....                                                                                                                                                     | 2    | 1 | seq |
| .....gggggaug <u>Ag</u> Acucacau <u>gg</u> .....                                                                                                                                           | 5    | 1 | seq |
| .....gggggaugagcucacau <u>gg</u> G <u>g</u> .....                                                                                                                                          | 22   | 1 | seq |
| .....gggggaugGagcucacau <u>gg</u> g <u>u</u> .....                                                                                                                                         | 1    | 1 | seq |
| .....gggggaugagcucacau <u>gg</u> U.....                                                                                                                                                    | 21   | 1 | seq |
| .....gggggaGguagcucacau <u>gg</u> g <u>u</u> .....                                                                                                                                         | 1    | 1 | seq |
| .....gggggaCguagcucacau <u>gg</u> g <u>u</u> .....                                                                                                                                         | 16   | 1 | seq |
| .....gggggaugagcucaca <u>Ag</u> gg.....                                                                                                                                                    | 1    | 1 | seq |
| .....gggggaugagcucacau <u>gg</u> g <u>u</u> .....                                                                                                                                          | 3735 | 0 | seq |
| .....gggggaugagcucacC <u>u</u> ggg <u>u</u> .....                                                                                                                                          | 2    | 1 | seq |
| .....gggggaugagcucacaC <u>g</u> gg <u>u</u> .....                                                                                                                                          | 144  | 1 | seq |
| .....gUgggaugagcucacau <u>gg</u> g <u>u</u> .....                                                                                                                                          | 8    | 1 | seq |
| .....gggggaugagcuUacau <u>gg</u> g <u>u</u> .....                                                                                                                                          | 2    | 1 | seq |
| .....gggggaugagcucacU <u>g</u> gg <u>u</u> .....                                                                                                                                           | 1    | 1 | seq |
| .....gggggaugagcucacau <u>gg</u> g <u>u</u> G.....                                                                                                                                         | 72   | 1 | seq |
| .....gggggaugagcucGca <u>u</u> ggg <u>u</u> .....                                                                                                                                          | 12   | 1 | seq |
| .....gggggaug <u>Ag</u> Acucacau <u>gg</u> g <u>u</u> .....                                                                                                                                | 3    | 1 | seq |
| .....gggggCu <u>g</u> uagcucacau <u>gg</u> g <u>u</u> .....                                                                                                                                | 1    | 1 | seq |
| .....gggggauguGgcucacau <u>gg</u> g <u>u</u> .....                                                                                                                                         | 11   | 1 | seq |
| .....gggggaugagcCcacau <u>gg</u> g <u>u</u> .....                                                                                                                                          | 16   | 1 | seq |
| .....Ngggaugagcucacau <u>gg</u> g <u>u</u> .....                                                                                                                                           | 5    | 1 | seq |
| .....gggggaugagcucacG <u>u</u> ggg <u>u</u> .....                                                                                                                                          | 78   | 1 | seq |
| .....gggggauguUgcucacau <u>gg</u> g <u>u</u> .....                                                                                                                                         | 1    | 1 | seq |
| .....gggggaugagcucacau <u>gg</u> g <u>u</u> C.....                                                                                                                                         | 3    | 1 | seq |
| .....gggggaugagUucacau <u>gg</u> g <u>u</u> .....                                                                                                                                          | 5    | 1 | seq |
| .....gggggaugagcucUca <u>u</u> ggg <u>u</u> .....                                                                                                                                          | 1    | 1 | seq |
| .....gggggaugagcucacauC <u>g</u> g <u>u</u> .....                                                                                                                                          | 1    | 1 | seq |
| .....gggggaugagcucacau <u>gg</u> g <u>u</u> <u>Ag</u> .....                                                                                                                                | 2    | 1 | seq |
| .....gggggaugagcucacaG <u>g</u> g <u>u</u> .....                                                                                                                                           | 4    | 1 | seq |
| .....gggggaugCagcucacau <u>gg</u> g <u>u</u> .....                                                                                                                                         | 15   | 1 | seq |
| .....gggggaugag <u>Ag</u> acacau <u>gg</u> g <u>u</u> .....                                                                                                                                | 2    | 1 | seq |
| .....gggggaugagcucacauG <u>u</u> g <u>u</u> .....                                                                                                                                          | 2    | 1 | seq |
| .....gggggaugagcCcacau <u>gg</u> g <u>u</u> .....                                                                                                                                          | 1    | 1 | seq |
| .....gggggaugagc <u>Ag</u> acacau <u>gg</u> g <u>u</u> .....                                                                                                                               | 1    | 1 | seq |
| .....ggg <u>Ag</u> uagcucacacau <u>gg</u> g <u>u</u> .....                                                                                                                                 | 3    | 1 | seq |
| .....gggggaugagcucacauU <u>g</u> g <u>u</u> .....                                                                                                                                          | 1    | 1 | seq |
| .....gggggaugagcucacau <u>gg</u> g <u>u</u> C <u>g</u> .....                                                                                                                               | 58   | 1 | seq |
| .....gggggaug <u>Ag</u> agcucacacau <u>gg</u> g <u>u</u> .....                                                                                                                             | 2    | 1 | seq |
| .....gggggaugagcCcacau <u>gg</u> g <u>u</u> .....                                                                                                                                          | 1    | 1 | seq |
| .....gggggaugagcCcacau <u>gg</u> g <u>u</u> ag.....                                                                                                                                        | 2    | 1 | seq |
| .....gggggaugagcucacacau <u>gg</u> g <u>u</u> ag.....                                                                                                                                      | 689  | 0 | seq |
| .....gg <u>Ag</u> augagcucacacau <u>gg</u> g <u>u</u> ag.....                                                                                                                              | 1    | 1 | seq |
| .....gggggauguUgcucacacau <u>gg</u> g <u>u</u> ag.....                                                                                                                                     | 1    | 1 | seq |



## Star

## Mature

uggcauuuuacugagcaaccaccgucacaaagacuacucugaaauuuagugagcaacccccgucacaacuuggggauguaagcucacauagguaagagugcucgcguuugcaugcgggag

|                                        |      |   |     |
|----------------------------------------|------|---|-----|
| .....gggggauguaagcucacauaggCag.....    | 3    | 1 | seq |
| .....gggggauguaagcucacauagguaA.....    | 33   | 1 | seq |
| .....gggggaCguagcucacauagguaG.....     | 4    | 1 | seq |
| .....gggggauguaagcucacauagguaC.....    | 2    | 1 | seq |
| .....gggggauguaagcucacGugguag.....     | 15   | 1 | seq |
| .....gggggauguaagcucacauaggCg.....     | 1    | 1 | seq |
| .....gggggauguaagcucGcaugguag.....     | 1    | 1 | seq |
| .....gggggauguaagcucacauaggAag.....    | 2    | 1 | seq |
| .....gggggaugCagcucacauagguaG.....     | 1    | 1 | seq |
| .....gggggauguaagcucacauaggUuag.....   | 2    | 1 | seq |
| .....gggggauguaagcucacauaggGg.....     | 2    | 1 | seq |
| .....gggggaugGgcucacauagguaG.....      | 1    | 1 | seq |
| .....gggggauguaagcucacCgguag.....      | 27   | 1 | seq |
| .....gggggauguaagcucacauaggUuaga.....  | 1    | 1 | seq |
| .....gggggauguaagcucUcaugguaga.....    | 1    | 1 | seq |
| .....gggggauguaagcucacCugguaga.....    | 3    | 1 | seq |
| .....gggggaCguagcucacauagguaG.....     | 6    | 1 | seq |
| .....gggggauguaAucacauagguaG.....      | 1    | 1 | seq |
| .....gggggauguaagcucGcaugguaga.....    | 3    | 1 | seq |
| .....ggUgauguaagcucacauagguaG.....     | 1    | 1 | seq |
| .....gggggauguaagcucacauagguaG.....    | 1107 | 0 | seq |
| .....gggggauguaagcucacauagguaCa.....   | 1    | 1 | seq |
| .....gggggauguaagcucacauagguaG.....    | 8    | 1 | seq |
| .....gggggauguaagcucacCgguaga.....     | 40   | 1 | seq |
| .....gggggauguaagcucacGugguaga.....    | 17   | 1 | seq |
| .....gggggauguaagcucacauaggCaga.....   | 2    | 1 | seq |
| .....NggggauguaagcucacauagguaG.....    | 2    | 1 | seq |
| .....gggggaugGgcucacauagguaG.....      | 4    | 1 | seq |
| .....gggggauguaagcucacauaggUga.....    | 2    | 1 | seq |
| .....gggggUuguaagcucacauagguaG.....    | 1    | 1 | seq |
| .....gggggaugCagcucacauagguaG.....     | 2    | 1 | seq |
| .....gggggauguaagAucacauagguaG.....    | 1    | 1 | seq |
| .....gggggauguaagcUacauagguaG.....     | 1    | 1 | seq |
| .....gggggauguaagUucacauagguaG.....    | 2    | 1 | seq |
| .....gggggauguaagcucacauagguaG.....    | 3    | 1 | seq |
| .....gggggauguaagcCcacauagguaG.....    | 3    | 1 | seq |
| .....gggggauguaagcucacauagguaG.....    | 26   | 1 | seq |
| .....gggggauguaagcucacauaggGga.....    | 5    | 1 | seq |
| .....gggggaugUgucacauagguaG.....       | 1    | 1 | seq |
| .....gggggauguaagcucacauagguaG.....    | 1    | 1 | seq |
| .....AggggauguaagcucacauagguaG.....    | 2    | 1 | seq |
| .....gggggauguaagcucacauagguaG.....    | 1    | 1 | seq |
| .....gggggaCguagcucacauagguaG.....     | 1    | 1 | seq |
| .....gggggauguaagUucacauagguaG.....    | 1    | 1 | seq |
| .....gggggaugGgcucacauagguaG.....      | 2    | 1 | seq |
| .....gggggauguaagcucacauagguaGA.....   | 18   | 1 | seq |
| .....gggggauguaagcucacGugguagag.....   | 6    | 1 | seq |
| .....gggggauguaagcucacauagguaG.....    | 626  | 0 | seq |
| .....gggggauguaagcucacauagguaGU.....   | 2    | 1 | seq |
| .....gggggauguaagcucacauagguaGC.....   | 5    | 1 | seq |
| .....gggggauguaagcucacauaggGgag.....   | 2    | 1 | seq |
| .....CgggauguaagcucacauagguaG.....     | 1    | 1 | seq |
| .....gggggauguaagcucacauagguaG.....    | 1    | 1 | seq |
| .....gggggauguaagcucacagguaGag.....    | 1    | 1 | seq |
| .....gggggauguaagcucacauaggGg.....     | 2    | 1 | seq |
| .....gggggauguaagcucacauagguaGC.....   | 1    | 1 | seq |
| .....gggggauguaagcucacCgguagag.....    | 20   | 1 | seq |
| .....gggggauguaagcucGcaugguagag.....   | 1    | 1 | seq |
| .....gggggauguaagcucGcaugguagagu.....  | 1    | 1 | seq |
| .....gggggauguaagGucacauagguaGagu..... | 1    | 1 | seq |
| .....gggggaUuagcucacauagguaGagu.....   | 1    | 1 | seq |
| .....gggggauguaagcucacauagguaGGu.....  | 1    | 1 | seq |
| .....gggggauguaagcUacauagguaGagu.....  | 1    | 1 | seq |
| .....gUgggauguaagcucacauagguaGagu..... | 3    | 1 | seq |
| .....gggggauguaagcucacauagguaGUu.....  | 1    | 1 | seq |
| .....gggggaCguagcucacauagguaGagu.....  | 1    | 1 | seq |
| .....NggggauguaagcucacauagguaGagu..... | 1    | 1 | seq |
| .....gggggauguaagcucacauagguaGagu..... | 223  | 0 | seq |
| .....gggggauguaagcucacGugguagagu.....  | 3    | 1 | seq |
| .....gggggauguaagcucacauagguaGau.....  | 1    | 1 | seq |

Star

Mature

uggcauuuuacugagcaaccacccgucacaaagacuacucugaauuuagugagcaacccccgucacaacuuggggauguagcucacaugguagagugcucgcuuugcaugcgggag

|                                                          |     |   |     |
|----------------------------------------------------------|-----|---|-----|
| .....gggggauguagcucac <u>aug</u> guagagG.....            | 3   | 1 | seq |
| .....gggggauguagcucac <u>C</u> gguagagu.....             | 4   | 1 | seq |
| .....gggggaGguagcucac <u>aug</u> guagagu.....            | 1   | 1 | seq |
| .....Aggggauguagcucac <u>aug</u> guagagu.....            | 1   | 1 | seq |
| .....gggggauguagcucac <u>aug</u> guagaguA.....           | 1   | 1 | seq |
| .....gggggauguagcucac <u>aug</u> guagagug.....           | 1   | 0 | seq |
| .....gggggauguagcucac <u>aug</u> guagagugC.....          | 1   | 0 | seq |
| .....gggggauguagcucac <u>aug</u> guagagAGc.....          | 1   | 1 | seq |
| .....gggggauguagcucac <u>aug</u> guagagugcu.....         | 1   | 0 | seq |
| .....gggggauguagcucac <u>aug</u> guagagugcuc.....        | 1   | 0 | seq |
| .....gggggauguagcucac <u>aug</u> guagagAGcuc.....        | 1   | 1 | seq |
| .....gggggauguagcucac <u>aug</u> guagagugcucg.....       | 1   | 0 | seq |
| .....gggggauguagcucac <u>aug</u> guagaguAcucg.....       | 1   | 1 | seq |
| .....gggggauguagcucac <u>aug</u> guagagAGcucgc.....      | 1   | 1 | seq |
| .....gggggauguagcucac <u>aug</u> guagagAGcucgcg.....     | 8   | 1 | seq |
| .....gggggauguagcucac <u>aug</u> guagagGgcucgc.....      | 1   | 1 | seq |
| .....gggggauguagcucac <u>aug</u> guagaguAcucgc.....      | 1   | 1 | seq |
| .....gggggauguagcucac <u>aug</u> guagagugcucgc.....      | 1   | 0 | seq |
| .....gggggauguagcucac <u>aug</u> guagagAGcucgcuu.....    | 2   | 1 | seq |
| .....gggggauguagcucac <u>aug</u> guagagugcucgcuuu.....   | 1   | 0 | seq |
| .....gggggauguagcucac <u>aug</u> guagagAGcucgcuuug.....  | 1   | 1 | seq |
| .....gggggauguagcucac <u>aug</u> guagagugcucgcuuug.....  | 1   | 0 | seq |
| .....gggggauguagcucac <u>aug</u> guagagugcucgcuuugc..... | 1   | 0 | seq |
| .....gggauguagcucac <u>C</u> ug.....                     | 1   | 1 | seq |
| .....gggauguGgcucac <u>aug</u> .....                     | 2   | 1 | seq |
| .....gggaugCagcucac <u>aug</u> .....                     | 1   | 1 | seq |
| .....gggauguagcucac <u>A</u> g.....                      | 1   | 1 | seq |
| .....ggUauguagcucac <u>aug</u> .....                     | 1   | 1 | seq |
| .....Nggauguagcucac <u>aug</u> .....                     | 2   | 1 | seq |
| .....gggauguagcucac <u>G</u> g.....                      | 2   | 1 | seq |
| .....gggauguagcucac <u>au</u> U.....                     | 3   | 1 | seq |
| .....gggauguagcucac <u>aug</u> .....                     | 445 | 0 | seq |
| .....gggauguagUucac <u>aug</u> .....                     | 1   | 1 | seq |
| .....gggauguagcucac <u>au</u> A.....                     | 20  | 1 | seq |
| .....ggCauguagcucac <u>aug</u> .....                     | 1   | 1 | seq |
| .....gggauguagcucac <u>C</u> g.....                      | 57  | 1 | seq |
| .....gggauguagcCcac <u>aug</u> .....                     | 1   | 1 | seq |
| .....gggauguagcucacGug.....                              | 65  | 1 | seq |
| .....gggauguUgcucac <u>aug</u> .....                     | 3   | 1 | seq |
| .....gggauguagcucac <u>au</u> Ag.....                    | 2   | 1 | seq |
| .....gggauguagcucac <u>C</u> gg.....                     | 18  | 1 | seq |
| .....gggaCguagcucac <u>aug</u> g.....                    | 1   | 1 | seq |
| .....gggauguagcucac <u>aug</u> U.....                    | 2   | 1 | seq |
| .....gggauguagcucac <u>C</u> gg.....                     | 2   | 1 | seq |
| .....gggaugCagcucac <u>aug</u> g.....                    | 2   | 1 | seq |
| .....gggauguagcucac <u>aug</u> g.....                    | 250 | 0 | seq |
| .....gggauguagcucGc <u>aug</u> g.....                    | 1   | 1 | seq |
| .....gggauguagcCcac <u>aug</u> g.....                    | 2   | 1 | seq |
| .....gggauguagcucacGug.....                              | 12  | 1 | seq |
| .....gggauguagcucac <u>aug</u> G.....                    | 14  | 1 | seq |
| .....gggauguagcucac <u>aug</u> gu.....                   | 311 | 0 | seq |
| .....gggauguagcucac <u>G</u> gu.....                     | 1   | 1 | seq |
| .....gggauguagcucac <u>aug</u> Cu.....                   | 1   | 1 | seq |
| .....gggaugAagcucac <u>aug</u> gu.....                   | 1   | 1 | seq |
| .....gggauguagcucac <u>aug</u> gC.....                   | 44  | 1 | seq |
| .....gggauguagcucacGuggu.....                            | 7   | 1 | seq |
| .....gAgauguagcucac <u>aug</u> gu.....                   | 1   | 1 | seq |
| .....gggauguagcucac <u>aug</u> gA.....                   | 9   | 1 | seq |
| .....gggauguagcucac <u>C</u> ggu.....                    | 10  | 1 | seq |
| .....gggauguagcuUac <u>aug</u> gu.....                   | 1   | 1 | seq |
| .....gggauguagcAcac <u>aug</u> gu.....                   | 1   | 1 | seq |
| .....gggauguagcCcac <u>aug</u> gu.....                   | 2   | 1 | seq |
| .....gggauguagcucac <u>aug</u> Ga.....                   | 1   | 1 | seq |
| .....gggauguagcucac <u>C</u> ggu.....                    | 5   | 1 | seq |
| .....gggauguagcCcac <u>aug</u> gua.....                  | 2   | 1 | seq |
| .....gggauguagcucac <u>aug</u> guU.....                  | 1   | 1 | seq |
| .....gggauguagcucac <u>aug</u> Uua.....                  | 2   | 1 | seq |
| .....gggaugCagcucac <u>aug</u> gua.....                  | 1   | 1 | seq |
| .....Uggauguagcucac <u>aug</u> gua.....                  | 2   | 1 | seq |
| .....gggauguagcucacGuggu.....                            | 4   | 1 | seq |

## Star

## Mature

uggcauuuuacugagcaaccaccgucacaaagacuacucugaaauuuagugagcaacccccgucacaacuuuggggauguagcucacauagguaugagugcucgcuuugcaugcgggag

|                                           |     |   |     |
|-------------------------------------------|-----|---|-----|
| .....gggauguagcucacauaggUG.....           | 2   | 1 | seq |
| .....gggauguagcucacauaggCa.....           | 1   | 1 | seq |
| .....gggauguGgucacauaggua.....            | 1   | 1 | seq |
| .....gggauguagcucacauaggua.....           | 233 | 0 | seq |
| .....gggauguaAucacauagguaG.....           | 1   | 1 | seq |
| .....gggauguagcucacauagguaG.....          | 15  | 0 | seq |
| .....gggauguagcucacCGguaG.....            | 4   | 1 | seq |
| .....gggauguagcucacauagguaA.....          | 1   | 1 | seq |
| .....gggauguagcCcacaugguaG.....           | 1   | 1 | seq |
| .....gggauguagcucacauagguaGa.....         | 41  | 0 | seq |
| .....gggauguagcucacauagguaGG.....         | 1   | 1 | seq |
| .....gggauguagcucacauagguaGU.....         | 1   | 1 | seq |
| .....gggauguagcucacCGuaGa.....            | 5   | 1 | seq |
| .....UggauguagcucacauagguaGa.....         | 1   | 1 | seq |
| .....gggauguagcCcacGugguaGa.....          | 2   | 1 | seq |
| .....ggAauguagcucacauagguaGa.....         | 1   | 1 | seq |
| .....gggauguagcucacauagguaGag.....        | 27  | 0 | seq |
| .....gggauguagcucacCGuaGagu.....          | 1   | 1 | seq |
| .....gggauguagcucacauagguaGagu.....       | 4   | 0 | seq |
| .....gggauguagcucacGugguaGagu.....        | 1   | 1 | seq |
| .....gggauguagcucacCG.....                | 2   | 1 | seq |
| .....gggauguagcucacauagg.....             | 5   | 0 | seq |
| .....gggauguagcucacauaggu.....            | 14  | 0 | seq |
| .....gggauguagcucacauaggC.....            | 1   | 1 | seq |
| .....gggauguagcucacGuggu.....             | 1   | 1 | seq |
| .....gggauguagcucacauaggua.....           | 12  | 0 | seq |
| .....gggauguagcCcacauggua.....            | 1   | 1 | seq |
| .....gggauguagcucacauagguaGa.....         | 4   | 0 | seq |
| .....gggauguagcucacauagguaGagu.....       | 1   | 0 | seq |
| .....gauguagcucGcauggu.....               | 1   | 1 | seq |
| .....gaugCagcucacauaggu.....              | 1   | 1 | seq |
| .....gauguGgcucacauaggu.....              | 1   | 1 | seq |
| .....gauguagcucacCGu.....                 | 12  | 1 | seq |
| .....gauguagcucacauaggA.....              | 2   | 1 | seq |
| .....gauguagcucacauaggu.....              | 234 | 0 | seq |
| .....gauguaAucacauaggu.....               | 2   | 1 | seq |
| .....gauguagcucacGuggu.....               | 6   | 1 | seq |
| .....gauguagUucacauaggu.....              | 1   | 1 | seq |
| .....gauguagcCcacauggC.....               | 33  | 1 | seq |
| .....gauguGgcucacauaggua.....             | 1   | 1 | seq |
| .....gauguagcucacauaggCa.....             | 1   | 1 | seq |
| .....gauguagcucacCGua.....                | 6   | 1 | seq |
| .....gauguagcucacGuggua.....              | 3   | 1 | seq |
| .....gauguagcucacauagguaG.....            | 3   | 1 | seq |
| .....Uauguagcucacauaggua.....             | 1   | 1 | seq |
| .....gauguagcucacauagguC.....             | 1   | 1 | seq |
| .....Aauguagcucacauaggua.....             | 1   | 1 | seq |
| .....gauguagcucUcauggua.....              | 1   | 1 | seq |
| .....gauguagcCcacauggua.....              | 1   | 1 | seq |
| .....gaAguagcucacauaggua.....             | 1   | 1 | seq |
| .....gauguagcucacauaggua.....             | 228 | 0 | seq |
| .....gaCguagcucacauagguaG.....            | 1   | 1 | seq |
| .....gauguagcucacGugguaG.....             | 1   | 1 | seq |
| .....UauguagcucacauagguaG.....            | 1   | 1 | seq |
| .....gauguagcucacauagguaGa.....           | 20  | 0 | seq |
| .....gauguagcucacauagguaGag.....          | 3   | 0 | seq |
| .....gauguagcucacCGuaGag.....             | 2   | 1 | seq |
| .....gauguagcucacauagguaGagu.....         | 2   | 0 | seq |
| .....gauguagcucacauagguaGagugcucgcuu..... | 1   | 0 | seq |
| .....auguagcucacauagguU.....              | 2   | 1 | seq |
| .....aCguagcucacauaggua.....              | 1   | 1 | seq |
| .....auguagcucacGuggua.....               | 2   | 1 | seq |
| .....auguagcucacCGua.....                 | 3   | 1 | seq |
| .....auguagcucGcauggua.....               | 1   | 1 | seq |
| .....auguagcucacauaggCa.....              | 3   | 1 | seq |
| .....auguagcucacauaggua.....              | 96  | 0 | seq |
| .....auguagcucacCGuaG.....                | 1   | 1 | seq |

## Star

## Mature

uggcauuuuacugagcaaccaccgucacaagacuacucugaaauuuagugagcaacccccgucacaacuuuggggauguagcucacaugguagagugcucgcuuugcaugcgggag

|                                          |    |   |     |
|------------------------------------------|----|---|-----|
| .....auguagcucacaugguag.....             | 5  | 0 | seq |
| .....auguagcucacaugguaga.....            | 35 | 0 | seq |
| .....auguagcucacaCgguaga.....            | 2  | 1 | seq |
| .....auguagcucacauAguaga.....            | 1  | 1 | seq |
| .....auguagcucacaugguagagugcucgU.....    | 1  | 1 | seq |
| .....uguagcucacauggGag.....              | 1  | 1 | seq |
| .....uguagcucacaugguag.....              | 6  | 0 | seq |
| .....uguagcucacaugguaA.....              | 2  | 1 | seq |
| .....uguagcucacauUguaga.....             | 1  | 1 | seq |
| .....uguagcucacauCguaga.....             | 1  | 1 | seq |
| .....uguagcucacauggCaga.....             | 1  | 1 | seq |
| .....uguagcucacaugguagG.....             | 5  | 1 | seq |
| .....uguagcucacaugguaga.....             | 76 | 0 | seq |
| .....uguagcucacaCgguaga.....             | 2  | 1 | seq |
| .....uguagcucacaugguagag.....            | 3  | 0 | seq |
| .....uguagcucacaugguagagugcucgcuuug..... | 1  | 0 | seq |
| .....guagcucacaugguaga.....              | 24 | 0 | seq |
| .....guagcucacaugguagag.....             | 1  | 0 | seq |
| .....guagcuUacaugguagag.....             | 1  | 1 | seq |
| .....guagcucacaugguagagugcucgc.....      | 1  | 0 | seq |
| .....uagcucacaugguagag.....              | 3  | 0 | seq |
| .....Cagcucacaugguagagugc.....           | 1  | 1 | seq |
| .....agcucacaugguagagugcucgcuuu.....     | 1  | 0 | seq |
| .....gcucacaugguagagugcucgcu.....        | 1  | 0 | seq |
| .....cucacaugguagagugcucg.....           | 1  | 0 | seq |
| .....cucacaugguagagugcucgcuuug.....      | 1  | 0 | seq |
| .....augguagagugcucgcuuu.....            | 2  | 0 | seq |
| .....aAgguagagugcucgcuuu.....            | 1  | 1 | seq |
| .....ugguagaguUcucgcuu.....              | 1  | 1 | seq |
| .....ugguagagugcucgcuuu.....             | 7  | 0 | seq |



Mature Star

[illegible]

|                                               |      |   |     |
|-----------------------------------------------|------|---|-----|
| gacaguuugggccAagugg                           | 1    | 1 | seq |
| gacagGuugggccgagugg                           | 1    | 1 | seq |
| gacaguuugggccgagugC                           | 14   | 1 | seq |
| gacaguuugggccgagugg                           | 1337 | 0 | seq |
| Uacaguuugggccgagugg                           | 1    | 1 | seq |
| gacaguuugggccgaguCg                           | 1    | 1 | seq |
| gacaguuugggccgagugA                           | 106  | 1 | seq |
| gacaguuuAgccgagugg                            | 2    | 1 | seq |
| gacaguuugggccgagAgg                           | 2    | 1 | seq |
| gUcaguuugggccgagugg                           | 2    | 1 | seq |
| gacaguuugggcAagugg                            | 1    | 1 | seq |
| gacaguuugggccgCgugg                           | 1    | 1 | seq |
| gacaguuCggccgagugg                            | 1    | 1 | seq |
| gaUaguuugggccgagugg                           | 3    | 1 | seq |
| gacaguuugggccgagugU                           | 17   | 1 | seq |
| gacaguuugggccgaguUg                           | 3    | 1 | seq |
| gacaAuugggccgagugg                            | 1    | 1 | seq |
| gacaguuugggccgagCgg                           | 3    | 1 | seq |
| gacaguuugggccgGgugg                           | 4    | 1 | seq |
| Nacaguuugggccgagugg                           | 3    | 1 | seq |
| gacaguuAggccgagugg                            | 1    | 1 | seq |
| gacaguuuggUcgagugg                            | 1    | 1 | seq |
| gacaguuugggccUagugg                           | 1    | 1 | seq |
| gacGguugggccgagugg                            | 3    | 1 | seq |
| gacaguuugggccgUgugg                           | 2    | 1 | seq |
| gacaguuugggccgagUgg                           | 5    | 1 | seq |
| Aacaguuugggccgagugg                           | 1    | 1 | seq |
| gacUguugggccgagugg                            | 1    | 1 | seq |
| gacagAuugggccgagugg                           | 1    | 1 | seq |
| gacagCuugggccgagugg                           | 1    | 1 | seq |
| gacaguuugCccgaguggu                           | 1    | 1 | seq |
| gacaguuugggccgaguggC                          | 20   | 1 | seq |
| gacaguuugggccgagugCu                          | 1    | 1 | seq |
| gacaguuugggccgaguggA                          | 2    | 1 | seq |
| gacaguuugggccgaguggu                          | 114  | 0 | seq |
| gacaguuugUccgaguggu                           | 1    | 1 | seq |
| gacaguuugggccgaguggG                          | 2    | 1 | seq |
| gacGguugggccgaguggu                           | 1    | 1 | seq |
| gacaguuugggccgaguggCc                         | 1    | 1 | seq |
| gacaguCugggccgagugguc                         | 2    | 1 | seq |
| gacaguuugCccgagugguc                          | 1    | 1 | seq |
| gacaguuugggccgagugguA                         | 5    | 1 | seq |
| gacaguuugUccgagugguc                          | 1    | 1 | seq |
| gacaguuugggccgagugguc                         | 184  | 0 | seq |
| gacaguuuggUcgagugguc                          | 1    | 1 | seq |
| gacaguuugggccgagugAuc                         | 1    | 1 | seq |
| gacaguuuggGcgagugguc                          | 1    | 1 | seq |
| gacaguuugggccgaguggucG                        | 2    | 1 | seq |
| gacaguuugggccgaguggAcu                        | 1    | 1 | seq |
| gacaguuugggccgaguggucA                        | 2    | 1 | seq |
| gacaguuugggccgaguggucC                        | 4    | 1 | seq |
| gacaguuugggccgagugCucu                        | 1    | 1 | seq |
| gacaguuugggccUaguggucu                        | 1    | 1 | seq |
| gacaguuugggccgaguggucu                        | 35   | 0 | seq |
| gacaguuugggccgaguggCcu                        | 1    | 1 | seq |
| gacaguuugggccgaguUgucua                       | 1    | 1 | seq |
| gacaguuugggccgaguggucCa                       | 1    | 1 | seq |
| gacaguuugggccgaguggucua                       | 20   | 0 | seq |
| gacaguuugggccgaguggucuaa                      | 1    | 0 | seq |
| gacaguuugggccgaguggucuaag                     | 1    | 0 | seq |
| gacaguuugggccgaguggucuaagg                    | 12   | 0 | seq |
| gacaguuugggccgaguggucuaagA                    | 1    | 1 | seq |
| gacaguuugggcAaguggucuaagggc                   | 1    | 1 | seq |
| gacaguuugggccgaguggucuaagggcgcca              | 1    | 0 | seq |
| gacaguuugggccgagCggucuaagggcgccag             | 1    | 1 | seq |
| gacaguuugggccgaguggucuaagggcgccaga            | 2    | 0 | seq |
| gacaguuugggccgaguggucuaagggcgccagau           | 1    | 0 | seq |
| gacaguuugggccgaguggucuaagggcUccagauu          | 1    | 1 | seq |
| gacaguuugggccgaguggucuaagggcgccagauu          | 1    | 0 | seq |
| gacaguuugggccgaguggucuaagggcgccagauuuagggcucA | 1    | 1 | seq |

# Mature Star

|                                                                                                           |    |   |     |
|-----------------------------------------------------------------------------------------------------------|----|---|-----|
| uuuuuugcauuuuuccguuuacgagaggaauuaaaaaaauugaauuuaaaaauuuuaaaccacugacaguuuggccgagugucuaaggcgccagauuuaggcucu |    |   |     |
| .....gacaguuuggccgagugguuuaaggcgccagauuuaggcucuC                                                          | 1  | 1 | seq |
| .....gacaguuuggccgagugguuuaaggcgccagauuuaggcucu                                                           | 1  | 0 | seq |
| .....acaguuuggccgagugg.....                                                                               | 58 | 0 | seq |
| .....acUguuuggccgagugg.....                                                                               | 1  | 1 | seq |
| .....acaguuuggccgagugA.....                                                                               | 7  | 1 | seq |
| .....Ucaguuuggccgagugg.....                                                                               | 1  | 1 | seq |
| .....acaguuuggccgagugU.....                                                                               | 1  | 1 | seq |
| .....acaguuuggccgaguggu.....                                                                              | 7  | 0 | seq |
| .....acaguuuggccgagugguc.....                                                                             | 3  | 0 | seq |
| .....acaguuuggccgaguggucua.....                                                                           | 1  | 0 | seq |
| .....caguuuggccgaguggC.....                                                                               | 1  | 1 | seq |
| .....caguuuggccgaguggu.....                                                                               | 5  | 0 | seq |
| .....caguAuggccgagugguc.....                                                                              | 2  | 1 | seq |
| .....caguuuggccgagugguc.....                                                                              | 46 | 0 | seq |
| .....caguuuggccgaguggucua.....                                                                            | 5  | 0 | seq |
| .....caguuuggccgaguggucuaaggcgccagauuuaggcuU.....                                                         | 1  | 1 | seq |
| .....aguuuuggccgagugguc.....                                                                              | 5  | 0 | seq |
| .....aguuuuggccgaAugguc.....                                                                              | 1  | 1 | seq |
| .....aguuuuggccgaguggucuaaggcgccagauuuag.....                                                             | 1  | 0 | seq |
| .....aguuuuggccgaguggucuaaggcgccagauuuaggcucu                                                             | 1  | 0 | seq |
| .....guuuggccgaguggucua.....                                                                              | 1  | 0 | seq |
| .....guuuggccgaguggucuaaggcg.....                                                                         | 1  | 0 | seq |
| .....guuuggccUaguggucuaaggcgcc.....                                                                       | 1  | 1 | seq |
| .....guuuggccgaguggucuaaggcgccagauuuag.....                                                               | 1  | 0 | seq |
| .....uuuggccgaguggucuaaggcgcuU.....                                                                       | 1  | 1 | seq |
| .....uuggccgaguggucuaaggcgccaga.....                                                                      | 1  | 0 | seq |
| .....uuggccgaguggucuaaggcuUccaga.....                                                                     | 1  | 1 | seq |
| .....uuggccgaguggucuaaggcgccagauuu.....                                                                   | 1  | 0 | seq |
| .....uuggccgaguggucuaaggcgccagauuuag.....                                                                 | 4  | 0 | seq |
| .....uuggccgaguggucuaaggcgccagauuuagU.....                                                                | 1  | 1 | seq |
| .....uggccgaguggucuaaggcgcc.....                                                                          | 1  | 0 | seq |
| .....uggccgaguggucuaaggcgccagau.....                                                                      | 1  | 0 | seq |
| .....uggccgaguggucuaaggcgccagauuuag.....                                                                  | 2  | 0 | seq |
| .....ggccgaguggucuaaggcgccagauuuag.....                                                                   | 1  | 0 | seq |
| .....ccgaguggucuaaggcgcuU.....                                                                            | 1  | 1 | seq |
| .....ccgaguggucuaaggcgcc.....                                                                             | 1  | 0 | seq |
| .....ccgaguggucuaaggcgccaga.....                                                                          | 1  | 0 | seq |
| .....ccgaguggucuaaggcgccagauuu.....                                                                       | 2  | 0 | seq |
| .....ccgaguggucuaaggcgccagauuuag.....                                                                     | 1  | 0 | seq |
| .....cgaguggucuaaggcgccagau.....                                                                          | 1  | 0 | seq |
| .....cgaguggucuaaggcgccagau.....                                                                          | 1  | 0 | seq |
| .....cgaguggucuaaggcgccagauuu.....                                                                        | 1  | 0 | seq |
| .....cgaguggucuaaggcgccagauuuag.....                                                                      | 2  | 0 | seq |
| .....cgaguggucuaGggcgccagauuuagg.....                                                                     | 1  | 1 | seq |
| .....cgaguggucuaaggcgccagauuuagA.....                                                                     | 1  | 1 | seq |
| .....cgaguggucuaaggcgccagauuuaggcuU.....                                                                  | 1  | 1 | seq |
| .....gaguggucuaaggcgccaga.....                                                                            | 1  | 0 | seq |
| .....gaguggucAaaggcgccagauuu.....                                                                         | 1  | 1 | seq |
| .....gaguggucuaaggAgccagauuuag.....                                                                       | 1  | 1 | seq |
| .....gaguggucuaaggcgccagauuuag.....                                                                       | 6  | 0 | seq |
| .....gaguggucuaaggcgccagauuuagg.....                                                                      | 1  | 0 | seq |
| .....uggucuaaggcgGaga.....                                                                                | 1  | 1 | seq |
| .....uggucuaaggcgGagau.....                                                                               | 1  | 1 | seq |
| .....uggucuaaggcgccagauuuag.....                                                                          | 1  | 0 | seq |
| .....ggucuaaggcgccagau.....                                                                               | 1  | 0 | seq |
| .....ggucuaaggcgccagauGag.....                                                                            | 1  | 1 | seq |
| .....ucuaaggcgccagaCuu.....                                                                               | 1  | 1 | seq |
| .....ucuaaggcgGagauuuaggcucu                                                                              | 3  | 1 | seq |
| .....cuaaggcgGagauuuaggcucu                                                                               | 1  | 1 | seq |
| .....uaaggcgccagauuuag.....                                                                               | 1  | 0 | seq |
| .....uaaCgcgccagauuuag.....                                                                               | 1  | 1 | seq |
| .....uaaggcgccagauuuagA.....                                                                              | 1  | 1 | seq |
| .....uaaggcAccagauuuagg.....                                                                              | 1  | 1 | seq |
| .....aaggcgGagauuuaggcuc.....                                                                             | 1  | 1 | seq |
| .....aaggcgGagauuuaggcucu                                                                                 | 1  | 1 | seq |
| .....aggcgGagauuuaggcucu                                                                                  | 2  | 1 | seq |
| .....aggcgAcagauuuaggcucu                                                                                 | 1  | 1 | seq |
| .....ggcgGagauuuaggcuc.....                                                                               | 1  | 1 | seq |

[illegible]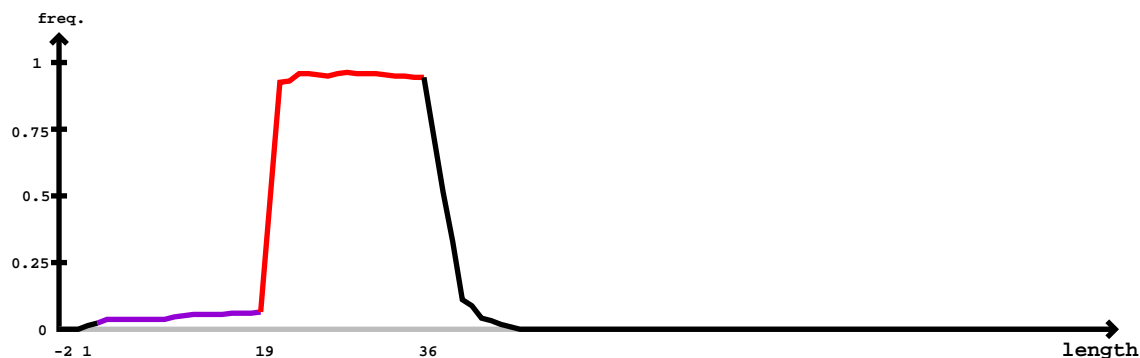

|                                                                                                                | -3'   | obs |        |
|----------------------------------------------------------------------------------------------------------------|-------|-----|--------|
|                                                                                                                |       | exp |        |
|                                                                                                                | reads | mm  | sample |
| gugugugcugcacucacaaaagacugccagugauaugcuggaggaaagcuuguucuguccuuccgugcaucucugugauggguaaaauuuccaugagaaaggggugacu  | 1     | 1   | seq    |
| gugugugcugcacucacacaagacugccagugauaugcuggaggaaagcuuguucuguccuuccgugcaucucugugauggguaaaauuuccaugagaaaggggugacu  | 1     | 1   | seq    |
| ((((( ((((((((((((.....)))))))))..))))).((( ((((((((((((.....)))))))).((( ((((((((((((.....))))))..))))))))).. | 1     | 1   | seq    |
| .ugCgugcugcacucacacaaa.....                                                                                    | 1     | 1   | seq    |
| .ugugugcugcacucacacaaGagacug.....                                                                              | 1     | 1   | seq    |
| .ugugugcugcacucacacaaGagacuggc.....                                                                            | 1     | 1   | seq    |
| .gCgugcugcacucacacaaa.....                                                                                     | 2     | 1   | seq    |
| .Cgugcugcacucacacaaa.....                                                                                      | 2     | 1   | seq    |
| .ugugcugcacucacaaGagacu.....                                                                                   | 1     | 1   | seq    |
| .....cacucacaaUagacugccagug.....                                                                               | 1     | 1   | seq    |
| .....cacucacaaaagacugccaguga.....                                                                              | 1     | 0   | seq    |
| .....acucacaaUagacugcca.....                                                                                   | 1     | 1   | seq    |
| .....cucacaaUagacugccagugaua.....                                                                              | 1     | 1   | seq    |
| .....caaaagacugccagugauaugcug.....                                                                             | 1     | 0   | seq    |
| .....aagacugccagugauaugc.....                                                                                  | 1     | 0   | seq    |
| .....agacugccagugauauA.....                                                                                    | 1     | 1   | seq    |
| .....Ngacugccagugauaug.....                                                                                    | 1     | 1   | seq    |
| .....agacugUcagugauaug.....                                                                                    | 1     | 1   | seq    |
| .....agacugccagugauaug.....                                                                                    | 58    | 0   | seq    |
| .....aUacugccagugauaug.....                                                                                    | 1     | 1   | seq    |
| .....agacugccagugauaugc.....                                                                                   | 27    | 0   | seq    |
| .....agacugccagugauGugc.....                                                                                   | 1     | 1   | seq    |
| .....Ggacugccagugauaugc.....                                                                                   | 1     | 1   | seq    |
| .....agacugccagugGuavgcu.....                                                                                  | 1     | 1   | seq    |
| .....agacugccagugauaugcu.....                                                                                  | 30    | 0   | seq    |
| .....agacugccagugauaugcC.....                                                                                  | 6     | 1   | seq    |
| .....agacugccGgugauaugcu.....                                                                                  | 1     | 1   | seq    |
| .....agacugccagGgauaugcu.....                                                                                  | 1     | 1   | seq    |
| .....agacugccagugauaugcGg.....                                                                                 | 1     | 1   | seq    |
| .....agacugccagugauaugcug.....                                                                                 | 40    | 0   | seq    |
| .....agacugccagugauaugcugg.....                                                                                | 2     | 0   | seq    |
| .....agacugccagugauaugcugga.....                                                                               | 4     | 0   | seq    |
| .....agacugccagugauaugcuggag.....                                                                              | 1     | 0   | seq    |
| .....agacugccagugauaugcuggagg.....                                                                             | 1     | 0   | seq    |
| .....agacugccagugauaugcuggagga.....                                                                            | 1     | 0   | seq    |
| .....gacugccagugauaugc.....                                                                                    | 1     | 0   | seq    |



Star

Mature

|                                                                                                               |   |   |     |
|---------------------------------------------------------------------------------------------------------------|---|---|-----|
| gugugugcugcacuacacaaaagacugccagugauaugcuggaggaaagcuuguucuguccuuccgugcaucucugugauggguaaaauuccaugagaaaggggugacu |   |   |     |
| .....gacugccagugauaugcC.....                                                                                  | 1 | 1 | seq |
| .....gacugccagugauaugcug.....                                                                                 | 4 | 0 | seq |
| .....gacugccagugauaugcugg.....                                                                                | 1 | 0 | seq |
| .....gacugccagugauaugcugga.....                                                                               | 2 | 0 | seq |
| .....gacugccagugauaugcuggag.....                                                                              | 1 | 0 | seq |
| .....gacugccagugauaugcuggagg.....                                                                             | 1 | 0 | seq |
| .....acugccagugauaCgcug.....                                                                                  | 1 | 1 | seq |
| .....cugccagugaCaugcugg.....                                                                                  | 1 | 1 | seq |
| .....cugccagugauaugcugg.....                                                                                  | 1 | 0 | seq |
| .....cugccagugauaugcugga.....                                                                                 | 4 | 0 | seq |
| .....cagugauaugcuggagg.....                                                                                   | 2 | 0 | seq |
| .....agugauaugcuggaggaa.....                                                                                  | 2 | 0 | seq |

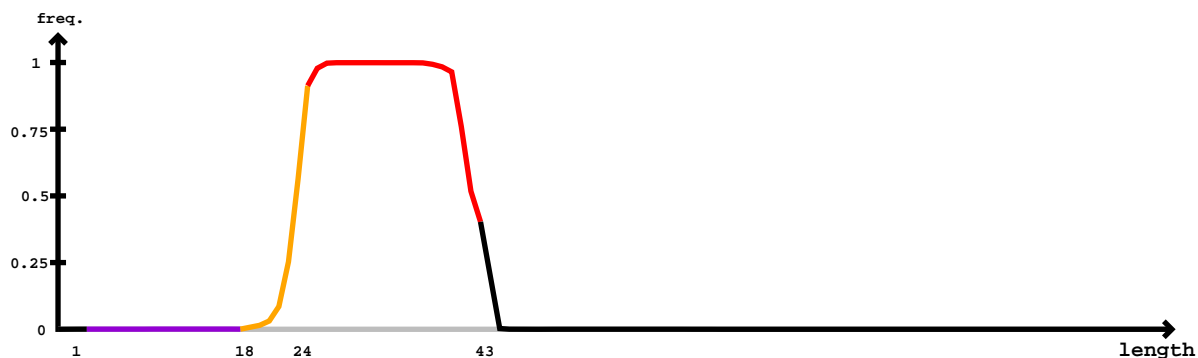

|     |                                                                                                                        |       |     |        |
|-----|------------------------------------------------------------------------------------------------------------------------|-------|-----|--------|
| 5 - | uucuuagggggucuauggucguuuaggccauggaaguuugagggaauuaauagguaugugaugcucuuacauguuucuaaggccacaugcaugcuacauugauguaguaaaaaagggc | -3'   | obs |        |
|     | uucuuagggggucuaugugucguuuaggccauggaaguuugagggaauuaauagguaugugaugcucuuacauguuucuaaggccacaugcaugcuacauugauguaguaaaaaaggc |       | exp |        |
|     | ((((((((...(((((((((...)))))))))))).))))))....((((((...(((...(((...)))))))))).((((((...)))))))).                       | reads | mm  | sample |
|     | uucuuaggggggaAcuauug.....                                                                                              | 6     | 1   | seq    |
|     | uucuuaggggggaAcuauugg.....                                                                                             | 4     | 1   | seq    |
|     | .ucuuagAgggucuaugg.....                                                                                                | 1     | 1   | seq    |
|     | .ucuuaggggggaAcuauugg.....                                                                                             | 3     | 1   | seq    |
|     | .....gggucuauggCcguuuu.....                                                                                            | 1     | 1   | seq    |
|     | .....gggucuauggCcguuuaggccaug.....                                                                                     | 1     | 1   | seq    |
|     | .....gggucuauggCcguuuaggccaugggaaguuug.....                                                                            | 1     | 1   | seq    |
|     | .....gggucuauggCcguuuaggccaugggaaguuugaggg.....                                                                        | 1     | 1   | seq    |
|     | .....uggucguuuaggccaugggaaguuugaggg.....                                                                               | 1     | 0   | seq    |
|     | .....gCcguuuaggccaugggaaguuugaggga.....                                                                                | 1     | 1   | seq    |
|     | .....ucguuuaggccaugggaagC.....                                                                                         | 1     | 1   | seq    |
|     | .....ucguuuaggccaugggaaguuug.....                                                                                      | 1     | 0   | seq    |
|     | .....Ncguuuaggccaugggaaguuugag.....                                                                                    | 1     | 1   | seq    |
|     | .....Ncguuuaggccaugggaaguuugaggg.....                                                                                  | 1     | 1   | seq    |
|     | .....Ccguuuaggccaugggaaguuugaggga.....                                                                                 | 4     | 1   | seq    |
|     | .....cguuuaggccaugggaag.....                                                                                           | 17    | 0   | seq    |
|     | .....cguuuagCccaugggaagu.....                                                                                          | 1     | 1   | seq    |
|     | .....cguuuaggccaugggaagu.....                                                                                          | 55    | 0   | seq    |
|     | .....cguuuaggccaugggaagC.....                                                                                          | 6     | 1   | seq    |
|     | .....cguuuaggccaugggaagG.....                                                                                          | 2     | 1   | seq    |
|     | .....cguuuaggccaugggGagu.....                                                                                          | 1     | 1   | seq    |
|     | .....cguuuaggccaugggaaguu.....                                                                                         | 45    | 0   | seq    |
|     | .....cguuuaggccaugggaaguC.....                                                                                         | 7     | 1   | seq    |
|     | .....cguuuaggccaugggaaguG.....                                                                                         | 1     | 1   | seq    |
|     | .....cguuuaggccGuggaaguu.....                                                                                          | 1     | 1   | seq    |
|     | .....cguCuaggccaugggaaguuu.....                                                                                        | 1     | 1   | seq    |
|     | .....cguuuaggccaugggaaguuC.....                                                                                        | 8     | 1   | seq    |
|     | .....cguuuaggccaugggaaguuu.....                                                                                        | 33    | 0   | seq    |
|     | .....cgCuaggccaugggaaguuug.....                                                                                        | 1     | 1   | seq    |
|     | .....cguuuaggccaugggaagCuug.....                                                                                       | 1     | 1   | seq    |
|     | .....cguuuaggccaugggaaguuuA.....                                                                                       | 2     | 1   | seq    |
|     | .....cUuuuaggccaugggaaguuug.....                                                                                       | 1     | 1   | seq    |
|     | .....cguuuaggccaugggaaguuug.....                                                                                       | 62    | 0   | seq    |

## Star

## Mature

uucuuagggggucuauggucguuuaggcccauggaaguuuagggaaauaaugguaugugaugcucuuacauguuucuaaggccacaugcaugcuacauugauguaguaaaaaaggc

|                                        |     |   |     |
|----------------------------------------|-----|---|-----|
| .....cguuuaggUcaugggaaguuug.....       | 1   | 1 | seq |
| .....cguuuaggcccauggaaguuGga.....      | 1   | 1 | seq |
| .....cguuuaggcccauggaaguuuga.....      | 38  | 0 | seq |
| .....cguuuaggcccauggaaguuugag.....     | 26  | 0 | seq |
| .....cguuuaggcccauggaGguuuagag.....    | 1   | 1 | seq |
| .....cguuuaggcccauggaaguuugaA.....     | 1   | 1 | seq |
| .....cguuuaggcccauggaaguuugagA.....    | 3   | 1 | seq |
| .....cguuuaggcccauggaaguuugagg.....    | 49  | 0 | seq |
| .....cUuuuaggcccauggaaguuugagg.....    | 1   | 1 | seq |
| .....cguuuaggcccauggaaguuugaggU.....   | 5   | 1 | seq |
| .....cguuuaggcccauggaaguuugaggga.....  | 1   | 0 | seq |
| .....gNuuaggcccauggaaguu.....          | 1   | 1 | seq |
| .....guuuaggcccaugggaaguu.....         | 61  | 0 | seq |
| .....guuuaggcccaugggaagA.....          | 1   | 1 | seq |
| .....guuuaggcccaugggaagC.....          | 10  | 1 | seq |
| .....guuuaggcccaugggaagCu.....         | 1   | 1 | seq |
| .....guuuaggcccaugggaaguu.....         | 50  | 0 | seq |
| .....guuuaggccGuggaaguu.....           | 1   | 1 | seq |
| .....Nuuuaggcccaugggaaguu.....         | 1   | 1 | seq |
| .....guuuuUgccaugggaaguu.....          | 1   | 1 | seq |
| .....guuuaggcccaugggaaguuG.....        | 1   | 1 | seq |
| .....guuuaggcccaugggaagGu.....         | 1   | 1 | seq |
| .....guuuaggcccaugggaaguuu.....        | 36  | 0 | seq |
| .....guuuaggcccaugggaaguuC.....        | 2   | 1 | seq |
| .....guuuaggcccaugggaaguuuA.....       | 1   | 1 | seq |
| .....guuuuAagccaugggaaguuug.....       | 1   | 1 | seq |
| .....guuuaggcccaugggaaguuug.....       | 23  | 0 | seq |
| .....guuuaggcccaugggaaguuuU.....       | 1   | 1 | seq |
| .....guuuaggcccaugggaUguuuuga.....     | 1   | 1 | seq |
| .....guuuaggcccaugggaaguuuugG.....     | 1   | 1 | seq |
| .....guuuaggcccaugggaaguuugU.....      | 1   | 1 | seq |
| .....guCuaggcccaugggaaguuuga.....      | 2   | 1 | seq |
| .....guuuaggccUauggaaguuuga.....       | 1   | 1 | seq |
| .....guuuaggcccaugggaaguuuga.....      | 49  | 0 | seq |
| .....guuuaggccGuggaaguuuga.....        | 1   | 1 | seq |
| .....guuuaggcccaugggaaguuugag.....     | 64  | 0 | seq |
| .....guuuaggcccaugggaUguuuugag.....    | 1   | 1 | seq |
| .....guuuaggcccaugggaaguuugGg.....     | 1   | 1 | seq |
| .....guuuaggcccaugggaaguuugagA.....    | 4   | 1 | seq |
| .....guuuaggcccaugggaaguuugGgg.....    | 1   | 1 | seq |
| .....guuuaggcccaugggaaguuugagU.....    | 1   | 1 | seq |
| .....guuuaggcccaugggaaguuugagg.....    | 89  | 0 | seq |
| .....guuuaggcccaugggaGguuuugagg.....   | 1   | 1 | seq |
| .....Uuuuaggcccaugggaaguuugagg.....    | 2   | 1 | seq |
| .....guuuaggcccaugggaaguuCugagg.....   | 1   | 1 | seq |
| .....guuuaggcccaugggaaguuugaggga.....  | 6   | 0 | seq |
| .....guuuaggcccaugggaaguuugaggG.....   | 3   | 1 | seq |
| .....guuuaggcccaugggaaguuugaggga.....  | 1   | 0 | seq |
| .....guuuaggcccaugggaaguuugagggaC..... | 1   | 1 | seq |
| .....uuuaggcccaugggaaguuG.....         | 2   | 1 | seq |
| .....uuuaggcccaugggaaguu.....          | 127 | 0 | seq |
| .....uuuaggccaCggaaguu.....            | 1   | 1 | seq |
| .....uuuaggccaugggaagAu.....           | 2   | 1 | seq |
| .....uuuaggccaugggaagGu.....           | 1   | 1 | seq |
| .....uuCaggccaugggaaguu.....           | 1   | 1 | seq |
| .....uuuGggccaugggaaguu.....           | 1   | 1 | seq |
| .....Auuaggccaugggaaguu.....           | 1   | 1 | seq |
| .....uuuaggcUauggaaguu.....            | 1   | 1 | seq |
| .....uuuaggccaugggaaguuAu.....         | 1   | 1 | seq |
| .....uuuaggccaugggaaguuCu.....         | 2   | 1 | seq |
| .....uuuaggccauggGaguuu.....           | 1   | 1 | seq |
| .....uuuaggccaugggaaguuu.....          | 81  | 0 | seq |
| .....uuuaggccaugggaaguuC.....          | 5   | 1 | seq |
| .....uuuaggccauggGaguuu.....           | 1   | 1 | seq |
| .....uuuaggccGuggaaguuu.....           | 1   | 1 | seq |
| .....uuuaggccaAggaaguuug.....          | 1   | 1 | seq |
| .....uuCaggccaugggaaguuug.....         | 1   | 1 | seq |
| .....uuuaggccaugggaaguuuA.....         | 11  | 1 | seq |
| .....uuuaggccauggGaguuug.....          | 4   | 1 | seq |
| .....uuuGggccaugggaaguuug.....         | 1   | 1 | seq |

# Star Mature

|                                                                                                                        |      |   |     |
|------------------------------------------------------------------------------------------------------------------------|------|---|-----|
| uucuuagggggucuaugggucguuuaggcccauggaaguuugaggaaauaaugguauugugaugcucuuacauguuucuaaggccacaugcaugcuacauugauguaguaaaaaaggc |      |   |     |
| .....uuuaggcccauggaGguuug.....                                                                                         | 1    | 1 | seq |
| .....Cuuaggcccauggaaguuug.....                                                                                         | 2    | 1 | seq |
| .....uuuaggcccauggaaguuCg.....                                                                                         | 1    | 1 | seq |
| .....uuuaggcccauggaaguuug.....                                                                                         | 390  | 0 | seq |
| .....Guuaggcccauggaaguuug.....                                                                                         | 1    | 1 | seq |
| .....uuuaggcUauggaaguuug.....                                                                                          | 2    | 1 | seq |
| .....uuuaggcccauggaaguuuC.....                                                                                         | 1    | 1 | seq |
| .....uuuaggccGuggaaguuuga.....                                                                                         | 1    | 1 | seq |
| .....Cuuaggcccauggaaguuuga.....                                                                                        | 1    | 1 | seq |
| .....uuuaggcccauggaaguuuG.....                                                                                         | 12   | 1 | seq |
| .....uuuaggccaCggaaguuuga.....                                                                                         | 1    | 1 | seq |
| .....uuCaggcccauggaaguuuga.....                                                                                        | 1    | 1 | seq |
| .....uuuaggcccauggaaguuuga.....                                                                                        | 327  | 0 | seq |
| .....uuuaggcccauggGaguuuga.....                                                                                        | 1    | 1 | seq |
| .....uuuaggcccauggaaguuuU.....                                                                                         | 2    | 1 | seq |
| .....uuuaggcccauggaagCuuga.....                                                                                        | 1    | 1 | seq |
| .....uuuaggcccauggaaguuugaC.....                                                                                       | 1    | 1 | seq |
| .....Auuaggcccauggaaguuugag.....                                                                                       | 1    | 1 | seq |
| .....uuuaggccUuggaaguuugag.....                                                                                        | 1    | 1 | seq |
| .....uuuaggcccauggaGguuugag.....                                                                                       | 2    | 1 | seq |
| .....uuuaggcccauggaaguuugag.....                                                                                       | 197  | 0 | seq |
| .....uuuaggcccauggGaguuugag.....                                                                                       | 1    | 1 | seq |
| .....uuuaggcccauggaaguuuGg.....                                                                                        | 2    | 1 | seq |
| .....Cuuaggcccauggaaguuugag.....                                                                                       | 1    | 1 | seq |
| .....uuCaggcccauggaaguuugagg.....                                                                                      | 1    | 1 | seq |
| .....uuuaggcccauggaagCuugagg.....                                                                                      | 1    | 1 | seq |
| .....uuuaggccaCggaaguuugagg.....                                                                                       | 1    | 1 | seq |
| .....uuuaggcGauggaaguuugagg.....                                                                                       | 1    | 1 | seq |
| .....uuuaggccaGggaaguuugagg.....                                                                                       | 1    | 1 | seq |
| .....Guuaggcccauggaaguuugagg.....                                                                                      | 1    | 1 | seq |
| .....uuuaggcccauggaaguuugagC.....                                                                                      | 1    | 1 | seq |
| .....uuuaggcccauggGaguuugagg.....                                                                                      | 1    | 1 | seq |
| .....uuuagUcccauggaaguuugagg.....                                                                                      | 2    | 1 | seq |
| .....uuuaggcccauggaaguuuUgg.....                                                                                       | 1    | 1 | seq |
| .....uuuaggcccauggaaguuugagA.....                                                                                      | 15   | 1 | seq |
| .....uuuaggcccauggaaguuugagg.....                                                                                      | 179  | 0 | seq |
| .....uuuaggcccauggaaguuugagU.....                                                                                      | 3    | 1 | seq |
| .....uuuaggcccauggaaguuugaggG.....                                                                                     | 3    | 1 | seq |
| .....uuuaggcccauggaaguuugaggga.....                                                                                    | 6    | 0 | seq |
| .....uuuaggcccauggCaguuugaggga.....                                                                                    | 1    | 1 | seq |
| .....uuuaggcccauggaaguuugaggga.....                                                                                    | 2    | 0 | seq |
| .....uuaggcccauggaaguuG.....                                                                                           | 2    | 1 | seq |
| .....uuaggcccauggaGguuu.....                                                                                           | 2    | 1 | seq |
| .....uCaggcccauggaaguuu.....                                                                                           | 1    | 1 | seq |
| .....uuaggcccauggUaguuu.....                                                                                           | 1    | 1 | seq |
| .....uuaggcccauggGaguuu.....                                                                                           | 1    | 1 | seq |
| .....uuaggcccauggaaguuu.....                                                                                           | 285  | 0 | seq |
| .....uuaggcccauggaaguuCu.....                                                                                          | 1    | 1 | seq |
| .....uuaggccUuggaaguuu.....                                                                                            | 1    | 1 | seq |
| .....uuaggcccauggaaguuuC.....                                                                                          | 29   | 1 | seq |
| .....uuaggccaAggaaguuu.....                                                                                            | 1    | 1 | seq |
| .....uuaggcccauggaaguuAg.....                                                                                          | 1    | 1 | seq |
| .....Nuaggcccauggaaguuug.....                                                                                          | 2    | 1 | seq |
| .....uuaggcccauggaaguuuA.....                                                                                          | 21   | 1 | seq |
| .....uuaggcccauggaaguGug.....                                                                                          | 1    | 1 | seq |
| .....uuaggccaAggaaguuug.....                                                                                           | 1    | 1 | seq |
| .....uuaggcccauGgaaguuug.....                                                                                          | 1    | 1 | seq |
| .....uuaggcccauggGaguuug.....                                                                                          | 4    | 1 | seq |
| .....uuaggcccauggaGguuug.....                                                                                          | 7    | 1 | seq |
| .....uuaggcccaugAaaguuug.....                                                                                          | 1    | 1 | seq |
| .....uuaggcccauggaaguuCg.....                                                                                          | 3    | 1 | seq |
| .....uGaggcccauggaaguuug.....                                                                                          | 1    | 1 | seq |
| .....uuaggcccauggaaguuug.....                                                                                          | 1344 | 0 | seq |
| .....uuCggcccauggaaguuug.....                                                                                          | 1    | 1 | seq |
| .....uuaggcccauggaaguuCug.....                                                                                         | 4    | 1 | seq |
| .....uuaggcccauggaaguuuC.....                                                                                          | 1    | 1 | seq |
| .....uuaggcccauggaaguuuU.....                                                                                          | 3    | 1 | seq |
| .....uuGggcccauggaaguuug.....                                                                                          | 5    | 1 | seq |
| .....uuagUcccauggaaguuug.....                                                                                          | 1    | 1 | seq |
| .....uuaggccGuggaaguuug.....                                                                                           | 5    | 1 | seq |

Star                      Mature

## Mature

uucuuagggggucuaaggucguuuaggccauggaaguuugaggaaauaaauagguaugugaugcucuuacauguucuaaggccacaugcaugcuaacauugauguaguaaaaaaggc

|                          |      |   |     |
|--------------------------|------|---|-----|
| uuaggccaCggaaguuug       | 3    | 1 | seq |
| uuaggccauggaagCuug       | 2    | 1 | seq |
| uuaggccaUgaaguuug        | 2    | 1 | seq |
| uCaggccauggaaguuug       | 1    | 1 | seq |
| uuaggcUauggaaguuug       | 2    | 1 | seq |
| uuaggccaCggaaguuuga      | 1    | 1 | seq |
| uuaggccauggaaguCuga      | 2    | 1 | seq |
| uuUggccauggaaguuuga      | 1    | 1 | seq |
| uuaggccauggaaguuugG      | 24   | 1 | seq |
| uuaggccauggaaguuuCa      | 2    | 1 | seq |
| Nuaggccauggaaguuuga      | 2    | 1 | seq |
| uuaggccauggaUguuuga      | 1    | 1 | seq |
| uuaggccauggaGguuuga      | 2    | 1 | seq |
| uuaggccauggaaguuugU      | 11   | 1 | seq |
| uuGggccauggaaguuuga      | 5    | 1 | seq |
| uuaggccaGggaaguuuga      | 1    | 1 | seq |
| uuaggccauggaaguuuAa      | 1    | 1 | seq |
| uuaggccauggaagCuuga      | 3    | 1 | seq |
| uuaggccauggaaguuCga      | 1    | 1 | seq |
| uuaggccGuggaaguuuga      | 3    | 1 | seq |
| Cuaggccauggaaguuuga      | 2    | 1 | seq |
| Auaggccauggaaguuuga      | 2    | 1 | seq |
| uuaggccauggaagGuuga      | 2    | 1 | seq |
| uuaggccauggGaguuga       | 7    | 1 | seq |
| Guaggccauggaaguuuga      | 1    | 1 | seq |
| uuaggccauggaaguuGga      | 1    | 1 | seq |
| uuaggccaAggaaguuuga      | 2    | 1 | seq |
| uuCggccauggaaguuuga      | 1    | 1 | seq |
| uuaggccauggaaguuuga      | 1104 | 0 | seq |
| uuaggccauggaGguuugag     | 1    | 1 | seq |
| uuaggccaCggaaguuugag     | 1    | 1 | seq |
| uuGggccauggaaguuugag     | 3    | 1 | seq |
| uuaggccauggaaguuugGg     | 3    | 1 | seq |
| uuagUccauggaaguuugag     | 1    | 1 | seq |
| Auaggccauggaaguuugag     | 1    | 1 | seq |
| uuaggccauggaagCuugag     | 1    | 1 | seq |
| uuaggccauggaaguuugag     | 308  | 0 | seq |
| uuaggccauggaaguuCgag     | 3    | 1 | seq |
| Nuaggccauggaaguuugag     | 2    | 1 | seq |
| uuaggccauggaaguuugGgg    | 9    | 1 | seq |
| uuaggccauggaaguuugUgg    | 2    | 1 | seq |
| uuagUccauggaaguuugagg    | 1    | 1 | seq |
| uuaggccauggaaguuugagA    | 55   | 1 | seq |
| uuaggccauggaaguuugaCg    | 2    | 1 | seq |
| uCaggccauggaaguuugagg    | 1    | 1 | seq |
| uuaggccaCggaaguuugagg    | 2    | 1 | seq |
| uuGggccauggaaguuugagg    | 2    | 1 | seq |
| uuaggccauggCaguugagg     | 1    | 1 | seq |
| uuaggccauggaaguuUagg     | 1    | 1 | seq |
| uuaggccGuggaaguuugagg    | 5    | 1 | seq |
| uuaggccauggGaguugagg     | 3    | 1 | seq |
| uuaggccaAggaaguuugagg    | 1    | 1 | seq |
| uuaggccauggaagCuugagg    | 1    | 1 | seq |
| Cuaggccauggaaguuugagg    | 3    | 1 | seq |
| uuaggccauggaaguuugagU    | 8    | 1 | seq |
| uuaggccaUgaaguuugagg     | 1    | 1 | seq |
| uuaggccauggaaguCugagg    | 2    | 1 | seq |
| uuaggccauggaaguuCgagg    | 3    | 1 | seq |
| uuaggccauggaaguuugaUg    | 1    | 1 | seq |
| uuaggccauggaagGuugagg    | 2    | 1 | seq |
| Guaggccauggaaguuugagg    | 3    | 1 | seq |
| uuaggccauggaaguuugagC    | 3    | 1 | seq |
| uuaggccauggaaguuugagg    | 955  | 0 | seq |
| uuaggccauggaGguuugagg    | 1    | 1 | seq |
| uuaggccauggaaguuugaggG   | 8    | 1 | seq |
| uuaggccauggaaguuugagCa   | 1    | 1 | seq |
| uuaggccauggaaguuugaggga  | 35   | 0 | seq |
| uuaggccauggaaguuugGggaa  | 1    | 1 | seq |
| uuaggccauggaaguuugaggGga | 1    | 1 | seq |
| uuaggccauggaaguuugagggaG | 2    | 1 | seq |

## Star

## Mature

uucuuagggggucuaugggucguuuaggcccauggaaguuugagggaauaauagguauugaugcucuuacauguuucuaaggccacaugcaugcuacauugauguaguuaaaaaggc

|                                       |      |   |     |
|---------------------------------------|------|---|-----|
| .....uuaggccGuggaaguuugaggaa.....     | 1    | 1 | seq |
| .....uuaggcccauggaaguuugaggaa.....    | 4    | 0 | seq |
| .....uuaggcccauggaaguuugaggGaa.....   | 1    | 1 | seq |
| .....uuaggcccauggaaguuugagggaaua..... | 1    | 0 | seq |
| .....Naggcccauggaaguuug.....          | 5    | 1 | seq |
| .....uaggcccauggaaguuug.....          | 3268 | 0 | seq |
| .....uaggcccauggaaguuGug.....         | 3    | 1 | seq |
| .....uUggcccauggaaguuug.....          | 4    | 1 | seq |
| .....uGggcccauggaaguuug.....          | 1    | 1 | seq |
| .....uaggcccauggaaguuuC.....          | 3    | 1 | seq |
| .....uaggGcauggaaguuug.....           | 1    | 1 | seq |
| .....uaggcccauggaUguuug.....          | 1    | 1 | seq |
| .....uGggcccauggaaguuug.....          | 8    | 1 | seq |
| .....uaggcccauggaaguuuA.....          | 64   | 1 | seq |
| .....uaggcccauggaagGuug.....          | 1    | 1 | seq |
| .....uaggcccauggaaguuAug.....         | 2    | 1 | seq |
| .....uaggcccauggaagCuug.....          | 6    | 1 | seq |
| .....uaggcccauggaaguuCg.....          | 13   | 1 | seq |
| .....uaggcccauggaaguuU.....           | 2    | 1 | seq |
| .....uaggccaAggaaguuug.....           | 1    | 1 | seq |
| .....uaggccaCggaaguuug.....           | 7    | 1 | seq |
| .....uaggcccauggaaguuCug.....         | 8    | 1 | seq |
| .....uaggcccauggUaguug.....           | 1    | 1 | seq |
| .....uaggcccauggaaguuAg.....          | 3    | 1 | seq |
| .....uaggcccauggaaguuAug.....         | 3    | 1 | seq |
| .....uaggcccauggaaguuGg.....          | 3    | 1 | seq |
| .....uaggcUauggaaguuug.....           | 5    | 1 | seq |
| .....uaggcccauggaGguuug.....          | 10   | 1 | seq |
| .....uaggcccauggaUguuuga.....         | 1    | 1 | seq |
| .....uUggcccauggaaguuuga.....         | 2    | 1 | seq |
| .....uaggcccauggaaguuuga.....         | 1613 | 0 | seq |
| .....uaggccaCggaaguuuga.....          | 3    | 1 | seq |
| .....uagUcccauggaaguuuga.....         | 3    | 1 | seq |
| .....uaggcUauggaaguuuga.....          | 1    | 1 | seq |
| .....uaggcccauggCaguuga.....          | 2    | 1 | seq |
| .....uaggcccauggaaguuAga.....         | 1    | 1 | seq |
| .....uaggcccauggaaguuCga.....         | 4    | 1 | seq |
| .....uaggccaAggaaguuuga.....          | 1    | 1 | seq |
| .....uaggcccauggaGguuuga.....         | 3    | 1 | seq |
| .....uaggcccauggaagCuuga.....         | 6    | 1 | seq |
| .....uaggcccauggaaguuCuga.....        | 1    | 1 | seq |
| .....uGggcccauggaaguuuga.....         | 2    | 1 | seq |
| .....uaggcccauggaaguuGga.....         | 1    | 1 | seq |
| .....uUggcccauggaaguuugag.....        | 1    | 1 | seq |
| .....uaggccaCggaaguuugag.....         | 2    | 1 | seq |
| .....uaggcccauggaaguuugaC.....        | 1    | 1 | seq |
| .....uaggcccauggaGguuugag.....        | 1    | 1 | seq |
| .....uaggcccaugUaaguuugag.....        | 1    | 1 | seq |
| .....uaggcccauggaaguuCugag.....       | 3    | 1 | seq |
| .....uaggcccauggaagCuugag.....        | 1    | 1 | seq |
| .....uaggcccauggaaguuuCag.....        | 2    | 1 | seq |
| .....uGggcccauggaaguuugag.....        | 2    | 1 | seq |
| .....uaggcccauggaaguuCgag.....        | 2    | 1 | seq |
| .....uaggcccauggaaguuugUg.....        | 2    | 1 | seq |
| .....uaggcUauggaaguuugag.....         | 1    | 1 | seq |
| .....uaggcccauggaaguuAugag.....       | 1    | 1 | seq |
| .....uaggcccauggaaguuugag.....        | 574  | 0 | seq |
| .....uaggcccauggaagGuugag.....        | 1    | 1 | seq |
| .....uaggcccauggGaguugag.....         | 5    | 1 | seq |
| .....uaggcUauggaaguuugagg.....        | 1    | 1 | seq |
| .....uaggcccauggaaguuCugagg.....      | 2    | 1 | seq |
| .....uaggcccauggaaguuuAagg.....       | 1    | 1 | seq |
| .....uaggcccauggaaguuCgagg.....       | 8    | 1 | seq |
| .....uaggcccauggaaguuAugagg.....      | 1    | 1 | seq |
| .....uaggcccauggGaguugagg.....        | 4    | 1 | seq |
| .....uaggcccauggaGguuugagg.....       | 8    | 1 | seq |
| .....uaggcccauggaCguuugagg.....       | 1    | 1 | seq |
| .....uaggccauUgaaguuugagg.....        | 1    | 1 | seq |
| .....uGggcccauggaaguuugagg.....       | 5    | 1 | seq |
| .....uaggcccauggaaguuugagC.....       | 7    | 1 | seq |

Star                      Mature

uucuuagggggucuaaggucguuuaggccauggaaguugaggaaauaaauagguaugugaugcucuuacauguucuaaggccacaugcaugcuacauugauguaguaaaaaaggc

|                              |      |   |     |
|------------------------------|------|---|-----|
| .uaggccauggaaguuugUgg.       | 2    | 1 | seq |
| .uaggccauggaaguuugagU.       | 18   | 1 | seq |
| .uaggccauggUaguuugagg.       | 2    | 1 | seq |
| .Naggccauggaaguuugagg.       | 3    | 1 | seq |
| .uaggccaCggaaguuugagg.       | 4    | 1 | seq |
| .uaggccauggaaguuugagA.       | 137  | 1 | seq |
| .uaggccauggaaguuugagagg.     | 1    | 1 | seq |
| .uagUccauggaaguuugagg.       | 2    | 1 | seq |
| .uaggccaAaggaaguuugagg.      | 2    | 1 | seq |
| .uaggccauggaaguuugagUg.      | 1    | 1 | seq |
| .uCggccauggaaguuugagg.       | 1    | 1 | seq |
| .uaggccauggaaguuugaCg.       | 1    | 1 | seq |
| .uaggccauggaaguuugaggg.      | 2045 | 0 | seq |
| .uaggccaugUaaguuugagg.       | 2    | 1 | seq |
| .uaggccauggaagCuugagg.       | 5    | 1 | seq |
| .uaggccauggaaguuugagCa.      | 2    | 1 | seq |
| .uaggccauggGaguuugaggga.     | 1    | 1 | seq |
| .uaggccauggaaguuugaggga.     | 129  | 0 | seq |
| .uaggcUauggaaguuugaggga.     | 1    | 1 | seq |
| .uaggccauggaaguuugUggga.     | 1    | 1 | seq |
| .uaggccaCggaaguuugaggga.     | 2    | 1 | seq |
| .uaggccauggaaguuugagggG.     | 10   | 1 | seq |
| .uaggccauggaaguuugagggaG.    | 2    | 1 | seq |
| .uaggccauggaaguuugagggGa.    | 10   | 1 | seq |
| .uaggccauggaaguuugagggaC.    | 1    | 1 | seq |
| .uaggccauggaaguuugagggaa.    | 5    | 0 | seq |
| .uaggccauggaaguuugagggaaau.  | 1    | 0 | seq |
| .uaggccauggaaguuugagggaaaua. | 1    | 0 | seq |
| .Cggccauggaaguuuga.          | 1    | 1 | seq |
| .Nggccauggaaguuuga.          | 4    | 1 | seq |
| .aggccaugAaaguuuga.          | 2    | 1 | seq |
| .aggccauggaaguuUGa.          | 3    | 1 | seq |
| .aggccauggaaguuuga.          | 2992 | 0 | seq |
| .aggccUuggaaguuuga.          | 2    | 1 | seq |
| .aggccauggaGguuuuga.         | 10   | 1 | seq |
| .aCgccauggaaguuuga.          | 1    | 1 | seq |
| .aggccaGggaaguuuga.          | 1    | 1 | seq |
| .aggccauggaaguuCuga.         | 12   | 1 | seq |
| .aggccauggaUguuuuga.         | 1    | 1 | seq |
| .aggccauggaaguuCga.          | 5    | 1 | seq |
| .agUccauggaaguuuga.          | 1    | 1 | seq |
| .aggccauggaaguuuCa.          | 1    | 1 | seq |
| .aggccauggaaguuuAa.          | 2    | 1 | seq |
| .aggccauggaagGuuga.          | 4    | 1 | seq |
| .aggccauggaaguuAuga.         | 1    | 1 | seq |
| .aggcGauggaaguuuga.          | 1    | 1 | seq |
| .aggccaCggaaguuuga.          | 2    | 1 | seq |
| .aggccCuuggaaguuuga.         | 1    | 1 | seq |
| .aggccauggaagAuuga.          | 1    | 1 | seq |
| .aggccauggCaguuuga.          | 1    | 1 | seq |
| .aggccauggUaguuuga.          | 1    | 1 | seq |
| .aggccauggGaguuugag.         | 2    | 1 | seq |
| .aggccUuggaaguuugag.         | 3    | 1 | seq |
| .aggccauggaaguuugaU.         | 2    | 1 | seq |
| .aggccaugUaaguuugag.         | 1    | 1 | seq |
| .aggccauggaGguuuugag.        | 3    | 1 | seq |
| .aggccauggaaguuCugag.        | 1    | 1 | seq |
| .aggccauggaaguuCgag.         | 2    | 1 | seq |
| .Uggccauggaaguuugag.         | 1    | 1 | seq |
| .aggccauggaaguuugag.         | 1308 | 0 | seq |
| .aggccauggUaguuugag.         | 2    | 1 | seq |
| .aggccauggaaguuuCag.         | 3    | 1 | seq |
| .aggccaCggaaguuugag.         | 1    | 1 | seq |
| .aggccauggaaguuuAag.         | 1    | 1 | seq |
| .Nggccauggaaguuugag.         | 3    | 1 | seq |
| .aggcUauggaaguuugag.         | 2    | 1 | seq |
| .aggcGauggaaguuugag.         | 1    | 1 | seq |
| .aggccauggaaguuuUagg.        | 1    | 1 | seq |
| .aggcUauggaaguuugagg.        | 5    | 1 | seq |
| .aggccaCggaaguuugagg.        | 7    | 1 | seq |

**Mature**

|                                    |      |   |     |
|------------------------------------|------|---|-----|
| .....Nggccaugggaaguuuaggg.....     | 5    | 1 | seq |
| .....aggccaAggaaguuuaggg.....      | 1    | 1 | seq |
| .....aggccUuggaaguuuaggg.....      | 1    | 1 | seq |
| .....aggccaugggaaguuGgagg.....     | 3    | 1 | seq |
| .....Uggccaugggaaguuuaggg.....     | 3    | 1 | seq |
| .....aggccaugggaaguuAgagg.....     | 2    | 1 | seq |
| .....Gggccaugggaaguuuaggg.....     | 14   | 1 | seq |
| .....aggccaugggaUguuuaggg.....     | 1    | 1 | seq |
| .....aggccaugggaaguCugagg.....     | 1    | 1 | seq |
| .....aggccaugggaaguuuugCgg.....    | 2    | 1 | seq |
| .....aggccaugggaaguuuugaCg.....    | 5    | 1 | seq |
| .....aggccaugggaaguuuugaUg.....    | 3    | 1 | seq |
| .....agUccaugggaaguuuaggg.....     | 1    | 1 | seq |
| .....aggccaugAaaguuuaggg.....      | 2    | 1 | seq |
| .....aggccaugggUaguuuaggg.....     | 2    | 1 | seq |
| .....aggccaugggaaguuuaggg.....     | 4154 | 0 | seq |
| .....aggccaugggaGguuuaggg.....     | 9    | 1 | seq |
| .....aggccaugggaaguuCgagg.....     | 5    | 1 | seq |
| .....aggccaugggaaguuuaggC.....     | 35   | 1 | seq |
| .....Cggccaugggaaguuuaggg.....     | 3    | 1 | seq |
| .....aggccaugggaagGuuaggg.....     | 1    | 1 | seq |
| .....aggccaugggGaguuuaggg.....     | 17   | 1 | seq |
| .....aggcGaugggaaguuuaggg.....     | 1    | 1 | seq |
| .....aggccaugggaaguuuaggA.....     | 241  | 1 | seq |
| .....agAccaugggaaguuuaggga.....    | 1    | 1 | seq |
| .....aggccaugggaaguuuaggCa.....    | 1    | 1 | seq |
| .....aggccaauAgaaguuuaggga.....    | 1    | 1 | seq |
| .....aggccaugggGaguuuaggga.....    | 1    | 1 | seq |
| .....aggccaugggaaguuuaggga.....    | 173  | 0 | seq |
| .....aggccaugggaaguuuAaggga.....   | 1    | 1 | seq |
| .....Uggccaugggaaguuuagggaa.....   | 1    | 1 | seq |
| .....aggccaugggaaguuuagggaG.....   | 2    | 1 | seq |
| .....aggccaugggaaguuuagggaU.....   | 1    | 1 | seq |
| .....aggccaugggaaguuuagggaa.....   | 12   | 0 | seq |
| .....aggccaugggaaguuuagggGa.....   | 14   | 1 | seq |
| .....aggccaugggaaguuuagggaCa.....  | 1    | 1 | seq |
| .....aUggccaugggaaguuuagggaau..... | 1    | 1 | seq |
| .....aggccaugggaaguuuagggNaau..... | 1    | 1 | seq |
| .....ggGccaugggaaguuuagg.....      | 2    | 1 | seq |
| .....ggccaugggaagGuuagg.....       | 2    | 1 | seq |
| .....ggccaAggaaguuuagg.....        | 1    | 1 | seq |
| .....ggccaugggaUguuuagg.....       | 1    | 1 | seq |
| .....ggccaugggaGguuuagg.....       | 3    | 1 | seq |
| .....ggccaugggaaguuugaC.....       | 1    | 1 | seq |
| .....ggccaugggGaguuuagg.....       | 1    | 1 | seq |
| .....ggccaugggaaguuuagg.....       | 418  | 0 | seq |
| .....ggccaugggaaguuuUagg.....      | 1    | 1 | seq |
| .....ggccaugggUaguuuagg.....       | 1    | 1 | seq |
| .....ggccaugggaaguuuaggg.....      | 1223 | 0 | seq |
| .....ggccaugggaGguuuaggg.....      | 5    | 1 | seq |
| .....ggccaugggaaguuGgagg.....      | 1    | 1 | seq |
| .....gUccaugggaaguuuaggg.....      | 1    | 1 | seq |
| .....ggccaugAaaguuuaggg.....       | 1    | 1 | seq |
| .....ggccaugggaaguuCgagg.....      | 2    | 1 | seq |
| .....ggccaugggaaguuGugagg.....     | 1    | 1 | seq |
| .....Cgccaugggaaguuuaggg.....      | 1    | 1 | seq |
| .....ggccaAggaaguuuaggg.....       | 1    | 1 | seq |
| .....Ngccaugggaaguuuaggg.....      | 1    | 1 | seq |
| .....ggccaugggGaguuuaggg.....      | 5    | 1 | seq |
| .....ggccaugggaaguuuaggC.....      | 3    | 1 | seq |
| .....ggccaCggaaguuuaggg.....       | 4    | 1 | seq |
| .....ggccaugggaaguuugaUg.....      | 1    | 1 | seq |
| .....ggccaugggaagGuuaggg.....      | 1    | 1 | seq |
| .....ggccaugggaaguuCugagg.....     | 3    | 1 | seq |
| .....ggccaugggaaguuuaggga.....     | 21   | 0 | seq |
| .....ggccaugggaaguuuagggGa.....    | 1    | 1 | seq |
| .....ggccaugggaaguuuagggaC.....    | 1    | 1 | seq |
| .....gccAAggaaguuuaggg.....        | 1    | 1 | seq |
| .....gccauggaGguuuaggg.....        | 1    | 1 | seq |
| .....gccauggaaguuCgagg.....        | 2    | 1 | seq |



Star

Mature

|                                                                                                                   |     |   |     |
|-------------------------------------------------------------------------------------------------------------------|-----|---|-----|
| uucuuaggggucuauggucguuuaggccauggaaguuugaggaaauaaugguaugugaugcucuuacauguucuaaggccacaugcaugcuacauugauguaguaaaaaaggc |     |   |     |
| .....gccauggaCguuugagg.....                                                                                       | 1   | 1 | seq |
| .....gccaCggaaguuugagg.....                                                                                       | 2   | 1 | seq |
| .....gccauggaaguuugCgg.....                                                                                       | 1   | 1 | seq |
| .....gccauggaUguuugagg.....                                                                                       | 2   | 1 | seq |
| .....gccauggaaguuugagg.....                                                                                       | 479 | 0 | seq |
| .....gccauggaagGuugagg.....                                                                                       | 2   | 1 | seq |
| .....gccauggaaguuugagC.....                                                                                       | 1   | 1 | seq |
| .....gGcauggaaguuugagg.....                                                                                       | 1   | 1 | seq |
| .....gccauggaaguuugagCa.....                                                                                      | 1   | 1 | seq |
| .....gccauggaaguuugagga.....                                                                                      | 7   | 0 | seq |
| .....ccauggaaguuugagga.....                                                                                       | 40  | 0 | seq |
| .....ccauggaaguuugaggaa.....                                                                                      | 2   | 0 | seq |
| .....ccauggaaguuugaggaCa.....                                                                                     | 1   | 1 | seq |
| .....aauagguCugugaugcu.....                                                                                       | 1   | 1 | seq |
| .....uagguCugugaugcucuu.....                                                                                      | 1   | 1 | seq |
| .....agguCugugaugcucuu.....                                                                                       | 1   | 1 | seq |
| .....agguCugugaugcucua.....                                                                                       | 1   | 1 | seq |

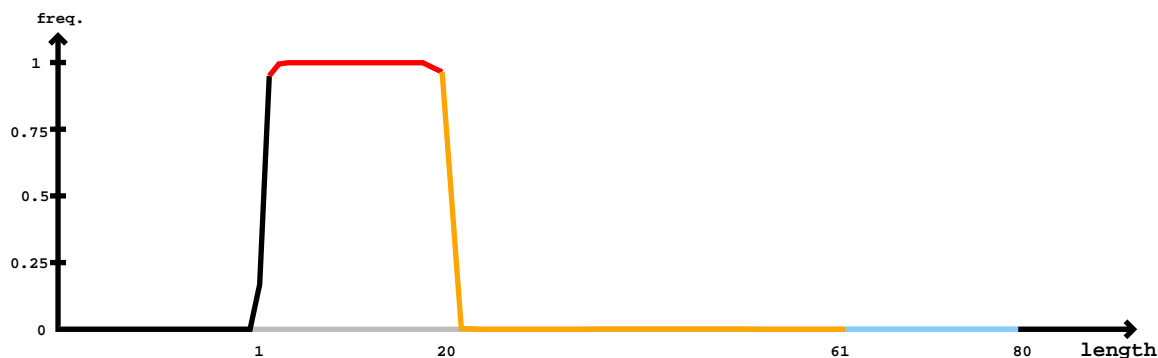

Star

[illegible]

## Mature

## Star

|                                                                                                                     |    |   |     |
|---------------------------------------------------------------------------------------------------------------------|----|---|-----|
| ggcaggagcuuccugggauuuugggauugaaggaggagcucccucuuugaggaggagcuuuuuuuagacugaugcacucccuuggggguucuuucuuuccuuuuaggcugcuucc |    |   |     |
| .....uuggauugaaggaggagcuccAu.....                                                                                   | 1  | 1 | seq |
| .....uuggauugaaggaggagcuccAuc.....                                                                                  | 1  | 1 | seq |
| .....uuggauugaaggaggagcuccUuc.....                                                                                  | 1  | 1 | seq |
| .....uuggauugaaggaggagcucc.....                                                                                     | 53 | 0 | seq |
| .....uUgauugaaggaggagcucc.....                                                                                      | 1  | 1 | seq |
| .....uuggauugaaggaggagcucc.....                                                                                     | 1  | 1 | seq |
| .....uuggauugaaggaggagcuccG.....                                                                                    | 1  | 1 | seq |
| .....uuggauugaaggaggagcuccc.....                                                                                    | 2  | 0 | seq |
| .....ggauugaaggaggagcucc.....                                                                                       | 6  | 0 | seq |
| .....uuuuuuGgacugaugca.....                                                                                         | 1  | 1 | seq |

Provisional ID : MA\_1304376\_43039  
Score total : 162020.3  
Score for star read(s) : 3.9  
Score for read counts : 162021.5  
Score for mfe : -2.8  
Score for randfold : -2.2  
Score for cons. seed :  
Total read count : 317810  
Mature read count : 314677  
Loop read count : 3025  
Star read count : 108

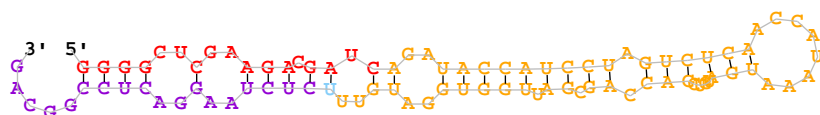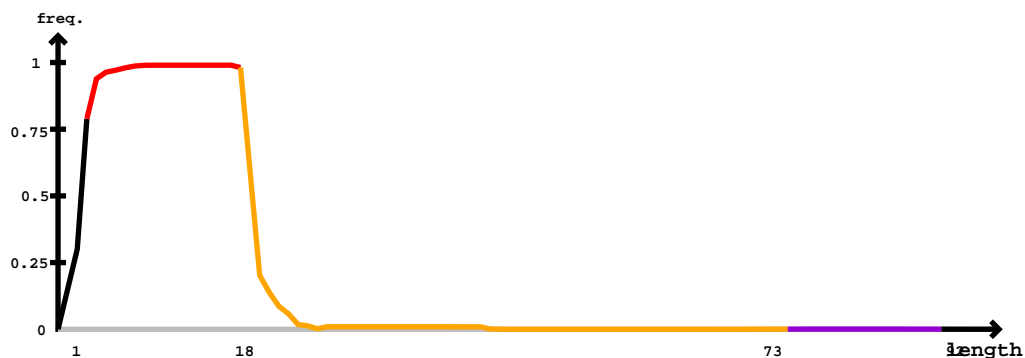

## Mature

## Star

| 5' - |   | -3'   | obs |        |
|------|---|-------|-----|--------|
|      |   |       | exp |        |
|      |   | reads | mm  | sample |
| g    | g | 16    | 1   | seq    |
| g    | g | 1     | 1   | seq    |
| g    | g | 1     | 1   | seq    |
| g    | g | 4     | 1   | seq    |
| g    | g | 337   | 1   | seq    |
| g    | g | 1     | 1   | seq    |
| g    | g | 3     | 1   | seq    |
| g    | g | 1     | 1   | seq    |
| g    | g | 2     | 1   | seq    |
| g    | g | 1     | 1   | seq    |
| g    | g | 25    | 1   | seq    |
| g    | g | 10    | 1   | seq    |
| g    | g | 1     | 1   | seq    |
| g    | g | 2     | 1   | seq    |
| g    | g | 1     | 1   | seq    |
| g    | g | 14    | 1   | seq    |
| g    | g | 1     | 1   | seq    |
| g    | g | 1     | 1   | seq    |
| g    | g | 33    | 1   | seq    |
| g    | g | 5     | 1   | seq    |
| g    | g | 5     | 1   | seq    |
| g    | g | 2308  | 0   | seq    |
| g    | g | 2     | 1   | seq    |
| g    | g | 10    | 1   | seq    |
| g    | g | 4     | 1   | seq    |
| g    | g | 5     | 1   | seq    |
| g    | g | 1     | 1   | seq    |
| g    | g | 17    | 1   | seq    |
| g    | g | 8     | 1   | seq    |
| g    | g | 168   | 1   | seq    |
| g    | g | 20    | 1   | seq    |
| g    | g | 422   | 1   | seq    |
| g    | g | 39    | 1   | seq    |

## Mature

## Star

|                                                                                             |       |   |     |
|---------------------------------------------------------------------------------------------|-------|---|-----|
| gggggucgaagacgaucagauaccuagucucaaccauaaaugaugucgaccagcgauugguggauguuucucuaaggacuccggcagcacc |       |   |     |
| gAggggucgaagacgauc.....                                                                     | 29    | 1 | seq |
| gggggucCgaagacgauc.....                                                                     | 135   | 1 | seq |
| gggggucgaaCacgauc.....                                                                      | 5     | 1 | seq |
| gggggAucgaagacgauc.....                                                                     | 8     | 1 | seq |
| gggggucgaagUcgauc.....                                                                      | 12    | 1 | seq |
| gggggucgaagacgCuc.....                                                                      | 9     | 1 | seq |
| ggCgggucgaagacgauc.....                                                                     | 2     | 1 | seq |
| ggUgggucgaagacgauc.....                                                                     | 24    | 1 | seq |
| Nggggucgaagacgauc.....                                                                      | 58    | 1 | seq |
| gggggcuGgaagacgauc.....                                                                     | 1     | 1 | seq |
| ggggCucgaagacgauc.....                                                                      | 4     | 1 | seq |
| gggggucgaGgacgauc.....                                                                      | 208   | 1 | seq |
| gggggucgaagaGgauc.....                                                                      | 6     | 1 | seq |
| gggggucgaCgacgauc.....                                                                      | 9     | 1 | seq |
| gggggucgaagaAgauc.....                                                                      | 7     | 1 | seq |
| gggggcuAgaagacgauc.....                                                                     | 10    | 1 | seq |
| gCgggucgaagacgauc.....                                                                      | 1     | 1 | seq |
| ggAggucgaagacgauc.....                                                                      | 28    | 1 | seq |
| gggggucgaagCcgauuc.....                                                                     | 8     | 1 | seq |
| gggUgcucgaagacgauc.....                                                                     | 23    | 1 | seq |
| ggggUcucgaagacgauc.....                                                                     | 8     | 1 | seq |
| gggggucgaagacgUuc.....                                                                      | 31    | 1 | seq |
| ggggAcucgaagacgauc.....                                                                     | 41    | 1 | seq |
| gggggucgaagacgaAc.....                                                                      | 18    | 1 | seq |
| gggggAcgaagacgauc.....                                                                      | 18    | 1 | seq |
| gggggucgaagacgaGc.....                                                                      | 76    | 1 | seq |
| gggggucgaagacUauc.....                                                                      | 13    | 1 | seq |
| gggggucUaagacgauc.....                                                                      | 27    | 1 | seq |
| gggggucgaagacgauc.....                                                                      | 47726 | 0 | seq |
| Uggggucgaagacgauc.....                                                                      | 169   | 1 | seq |
| gggggucgCagacgauc.....                                                                      | 8     | 1 | seq |
| gggggucgaagacgauA.....                                                                      | 352   | 1 | seq |
| gggggucNaagacgauc.....                                                                      | 1     | 1 | seq |
| gggggucgaaUacgauc.....                                                                      | 8     | 1 | seq |
| Cggggucgaagacgauc.....                                                                      | 12    | 1 | seq |
| gggggucgaagacCauc.....                                                                      | 8     | 1 | seq |
| gggggucgaUgacgauc.....                                                                      | 25    | 1 | seq |
| gggggucgUagacgauc.....                                                                      | 10    | 1 | seq |
| gggggUucgaagacgauc.....                                                                     | 31    | 1 | seq |
| gggggucgGagacgauc.....                                                                      | 140   | 1 | seq |
| gggggucgaagacgauU.....                                                                      | 1371  | 1 | seq |
| gggggucgUagacgauca.....                                                                     | 6     | 1 | seq |
| gggggucgaaAacgauca.....                                                                     | 5     | 1 | seq |
| gggggUucgaagacgauca.....                                                                    | 3     | 1 | seq |
| Nggggucgaagacgauca.....                                                                     | 25    | 1 | seq |
| ggCgggucgaagacgauca.....                                                                    | 6     | 1 | seq |
| gggggcuGgaagacgauca.....                                                                    | 1     | 1 | seq |
| ggggAcucgaagacgauca.....                                                                    | 19    | 1 | seq |
| gggggucgaagacgaAca.....                                                                     | 10    | 1 | seq |
| gggggucgaagacCauca.....                                                                     | 6     | 1 | seq |
| gggggucgaagacgUuca.....                                                                     | 21    | 1 | seq |
| Cggggucgaagacgauca.....                                                                     | 16    | 1 | seq |
| gggggucgaaCacgauca.....                                                                     | 2     | 1 | seq |
| gggggUucgaagacgauca.....                                                                    | 23    | 1 | seq |
| gggggucgaagacgaucU.....                                                                     | 144   | 1 | seq |
| gggggucCgaagacgauca.....                                                                    | 73    | 1 | seq |
| gggggucgaagacgauca.....                                                                     | 28744 | 0 | seq |
| gggUgcucgaagacgauca.....                                                                    | 13    | 1 | seq |
| gggggucgaaUacgauca.....                                                                     | 1     | 1 | seq |
| gggggucgaagacgaucC.....                                                                     | 27    | 1 | seq |
| gggggucgaagacgGuca.....                                                                     | 95    | 1 | seq |
| gggggucgaagacUauca.....                                                                     | 8     | 1 | seq |
| ggAggucgaagacgauca.....                                                                     | 25    | 1 | seq |
| ggggUcucgaagacgauca.....                                                                    | 4     | 1 | seq |
| gggggucgaagacgaCca.....                                                                     | 183   | 1 | seq |
| gggggucgaGgacgauca.....                                                                     | 106   | 1 | seq |
| ggUggucgaagacgauca.....                                                                     | 24    | 1 | seq |
| gggggucgaUgacgauca.....                                                                     | 11    | 1 | seq |
| gggggucCaagacgauca.....                                                                     | 2     | 1 | seq |
| gggggucgaagacgaucG.....                                                                     | 784   | 1 | seq |

## Mature

## Star

gggggucugaagacgaucagauaccuagucuaaccauaaaugaugucgaccagcgauugguggauguuucucuaaggacuccggcagcacc

|                            |      |   |     |
|----------------------------|------|---|-----|
| gggggucugaagacGgauca.....  | 9    | 1 | seq |
| gggggucugaagCcgauca.....   | 3    | 1 | seq |
| gUgggucugaagacgauca.....   | 12   | 1 | seq |
| gggggcAcgaagacgauca.....   | 14   | 1 | seq |
| gggggucugaagacgauUa.....   | 30   | 1 | seq |
| Ugggucugaagacgauca.....    | 178  | 1 | seq |
| gggggucugaagacgaGga.....   | 4    | 1 | seq |
| gggggAucgaagacgauca.....   | 10   | 1 | seq |
| gggggucugGagacgauca.....   | 101  | 1 | seq |
| gggggucUaagacgauca.....    | 7    | 1 | seq |
| gggggucugaagacgCuca.....   | 8    | 1 | seq |
| gggAgcucgaagacgauca.....   | 18   | 1 | seq |
| gggggcuAgaagacgauca.....   | 1    | 1 | seq |
| gggggucugaagacgauAa.....   | 6    | 1 | seq |
| gggggucugCagacgauca.....   | 1    | 1 | seq |
| gggggucugaCgacgauca.....   | 7    | 1 | seq |
| ggggCcucgaagacgauca.....   | 2    | 1 | seq |
| gAgggucugaagacgauca.....   | 18   | 1 | seq |
| gggggucugaagacgaGca.....   | 36   | 1 | seq |
| gggggucugaagUcgauca.....   | 6    | 1 | seq |
| gggggucugaagaAgauca.....   | 3    | 1 | seq |
| gggggucugaagacCaucag.....  | 1    | 1 | seq |
| gggggucugaagacgaucUg.....  | 1    | 1 | seq |
| ggAggcugaagacgaucag.....   | 2    | 1 | seq |
| gggggAucgaagacgaucag.....  | 1    | 1 | seq |
| gggggucugaagacgaCcag.....  | 9    | 1 | seq |
| gggggucugaagacgaucCg.....  | 2    | 1 | seq |
| gggggucugaagacgaucaC.....  | 7    | 1 | seq |
| Cggggucugaagacgaucag.....  | 2    | 1 | seq |
| gggggucUaagacgaucag.....   | 1    | 1 | seq |
| gggggucugaagacgauAag.....  | 1    | 1 | seq |
| gggggucugaagacgGucag.....  | 14   | 1 | seq |
| gggggucugaagacgaAacag..... | 1    | 1 | seq |
| Nggggucugaagacgaucag.....  | 6    | 1 | seq |
| gggggucugaagacgaucGg.....  | 21   | 1 | seq |
| Aggggucugaagacgaucag.....  | 10   | 1 | seq |
| gggggcAcgaagacgaucag.....  | 2    | 1 | seq |
| gggggUucgaagacgaucag.....  | 1    | 1 | seq |
| gggggucugaagacgauUag.....  | 4    | 1 | seq |
| gggAgcucgaagacgaucag.....  | 3    | 1 | seq |
| Uggggucugaagacgaucag.....  | 15   | 1 | seq |
| gggggucugGagacgaucag.....  | 13   | 1 | seq |
| gggggucugaCgacgaucag.....  | 1    | 1 | seq |
| gggggucugaAacgaucag.....   | 1    | 1 | seq |
| gggggGucgaagacgaucag.....  | 1    | 1 | seq |
| gggggucugaaUacgaucag.....  | 2    | 1 | seq |
| ggUggucugaagacgaucag.....  | 4    | 1 | seq |
| gCgggucugaagacgaucag.....  | 1    | 1 | seq |
| gggggucugaagacUaucag.....  | 1    | 1 | seq |
| gggggcCcgaagacgaucag.....  | 10   | 1 | seq |
| gggggucugaagacgaucag.....  | 4480 | 0 | seq |
| ggggUcucgaagacgaucag.....  | 1    | 1 | seq |
| ggggAcucgaagacgaucag.....  | 3    | 1 | seq |
| gggggucugaGgacgaucag.....  | 15   | 1 | seq |
| ggggCcucgaagacgaucag.....  | 1    | 1 | seq |
| gUgggucugaagacgaucag.....  | 3    | 1 | seq |
| gggggucugaagGcgaucag.....  | 13   | 1 | seq |
| gAgggucugaagacgaucag.....  | 4    | 1 | seq |
| gggggucugaagaGgaucag.....  | 1    | 1 | seq |
| gggggucugaagacgUucag.....  | 4    | 1 | seq |
| gggggucugaagacgaGcag.....  | 4    | 1 | seq |
| gggggucugaagacgaucaCa..... | 2    | 1 | seq |
| gggggucugaagacgaucagG..... | 61   | 1 | seq |
| Aggggucugaagacgaucaga..... | 8    | 1 | seq |
| gggggucugaagacgaucCga..... | 2    | 1 | seq |
| gggggucugaagacgaCcaga..... | 7    | 1 | seq |
| gggggucugaagacgaucaga..... | 3095 | 0 | seq |
| gggggucugaagacgGucaga..... | 11   | 1 | seq |
| gggggucugaagacgaucGga..... | 18   | 1 | seq |
| gggggucCaagacgaucaga.....  | 1    | 1 | seq |

## Mature

## Star

gggggucugaagacgaucagauaccuagucucaaccauaaaugaugucgaccagcgauugguggauguuuucuaaggacuccggcagcacc

|                                   |      |   |     |
|-----------------------------------|------|---|-----|
| gAggggucugaagacgaucaga. . . . .   | 1    | 1 | seq |
| gggggucugaagacUaucaga. . . . .    | 2    | 1 | seq |
| gUgggucugaagacgaucaga. . . . .    | 2    | 1 | seq |
| gggggucugaagacgCucaga. . . . .    | 1    | 1 | seq |
| gggggucugaagacgauUaga. . . . .    | 4    | 1 | seq |
| gggggucugaGgacgaucaga. . . . .    | 9    | 1 | seq |
| gggAgcucugaagacgaucaga. . . . .   | 1    | 1 | seq |
| ggUgggucugaagacgaucaga. . . . .   | 1    | 1 | seq |
| ggAggucugaagacgaucaga. . . . .    | 5    | 1 | seq |
| gggggUucugaagacgaucaga. . . . .   | 2    | 1 | seq |
| gggggucugaagacgaGcaga. . . . .    | 1    | 1 | seq |
| gggggucugaagGcgauucaga. . . . .   | 11   | 1 | seq |
| Uggggucugaagacgaucaga. . . . .    | 14   | 1 | seq |
| gggggucugaacCacgaucaga. . . . .   | 2    | 1 | seq |
| Nggggucugaagacgaucaga. . . . .    | 2    | 1 | seq |
| gggUgcucugaagacgaucaga. . . . .   | 4    | 1 | seq |
| gggggAcucugaagacgaucaga. . . . .  | 2    | 1 | seq |
| gggggucugaUgacgaucaga. . . . .    | 2    | 1 | seq |
| gggggCcCgaagacgaucaga. . . . .    | 5    | 1 | seq |
| gggggucugaagacgaucUga. . . . .    | 2    | 1 | seq |
| gggggucugaagacgaucagU. . . . .    | 15   | 1 | seq |
| gggggucugaagacgaucagC. . . . .    | 3    | 1 | seq |
| gggggucugaagacgauAaga. . . . .    | 1    | 1 | seq |
| gggggucugGagacgaucaga. . . . .    | 13   | 1 | seq |
| gggggAcucugaagacgaucagau. . . . . | 1    | 1 | seq |
| gggggucugaagacgaucagaG. . . . .   | 9    | 1 | seq |
| ggCggucugaagacgaucagau. . . . .   | 1    | 1 | seq |
| Uggggucugaagacgaucagau. . . . .   | 6    | 1 | seq |
| gggggUucugaagacgaucagau. . . . .  | 2    | 1 | seq |
| gggUgcucugaagacgaucagau. . . . .  | 2    | 1 | seq |
| gggggucugGagacgaucagau. . . . .   | 2    | 1 | seq |
| gggggucugaagacgaucUgau. . . . .   | 1    | 1 | seq |
| gggggucugaagacgaucGgau. . . . .   | 6    | 1 | seq |
| gggAgcucugaagacgaucagau. . . . .  | 2    | 1 | seq |
| gggggucugaagacgaucagau. . . . .   | 1149 | 0 | seq |
| ggAggucugaagacgaucagau. . . . .   | 2    | 1 | seq |
| gggggucugCagacgaucagau. . . . .   | 1    | 1 | seq |
| gggggucugaagUcgauucagau. . . . .  | 1    | 1 | seq |
| gggggucugaagacgaucagaC. . . . .   | 133  | 1 | seq |
| gggggucugaGgacgaucagau. . . . .   | 3    | 1 | seq |
| gggggucugaagGcgauucagau. . . . .  | 3    | 1 | seq |
| gUgggucugaagacgaucagau. . . . .   | 2    | 1 | seq |
| Aggggucugaagacgaucagau. . . . .   | 3    | 1 | seq |
| gggggUucugaagacgaucagau. . . . .  | 1    | 1 | seq |
| gggCgcucugaagacgaucagau. . . . .  | 1    | 1 | seq |
| gggggCcCgaagacgaucagau. . . . .   | 1    | 1 | seq |
| gggggucugaagacgaCcgau. . . . .    | 1    | 1 | seq |
| gggggucugaagacgGucagau. . . . .   | 2    | 1 | seq |
| gggggucugaagacgaAacagau. . . . .  | 1    | 1 | seq |
| Nggggucugaagacgaucagau. . . . .   | 2    | 1 | seq |
| gggggucugaagacgaucagaA. . . . .   | 3    | 1 | seq |
| gggggCcAcgaagacgaucagau. . . . .  | 1    | 1 | seq |
| gggggcuAgaagacgaucagau. . . . .   | 1    | 1 | seq |
| gggggucugaagacgaucagGu. . . . .   | 6    | 1 | seq |
| gggggucugaagGcgauucagaua. . . . . | 1    | 1 | seq |
| gCgggucugaagacgaucagaua. . . . .  | 2    | 1 | seq |
| gggggucugaagacgaucagauG. . . . .  | 9    | 1 | seq |
| Aggggucugaagacgaucagaua. . . . .  | 1    | 1 | seq |
| gggggucugaagacgCucagaua. . . . .  | 1    | 1 | seq |
| gggggucugaagCcgauucagaua. . . . . | 1    | 1 | seq |
| gggggucugaagacgaucagauU. . . . .  | 4    | 1 | seq |
| gggggCcCgaagacgaucagaua. . . . .  | 2    | 1 | seq |
| gggggucugaagacUaucagaua. . . . .  | 1    | 1 | seq |
| ggAgggucugaagacgaucagaua. . . . . | 1    | 1 | seq |
| gggggucugaagacgaucagaCa. . . . .  | 16   | 1 | seq |
| ggggCucugaagacgaucagaua. . . . .  | 1    | 1 | seq |
| gggAgcucugaagacgaucagaua. . . . . | 1    | 1 | seq |
| gggggucugaagacgaucagCua. . . . .  | 1    | 1 | seq |
| gggggucugGagacgaucagaua. . . . .  | 9    | 1 | seq |
| gggggucugaagUcgauucagaua. . . . . | 1    | 1 | seq |

## Mature

## Star

gggggucugaagacgaucagauaccuagucuaaccuauaaugaugucgaccagcgauugguggauguuucucuaaggacuccggcagcacc

|                                     |       |   |     |
|-------------------------------------|-------|---|-----|
| gggggucugaagacgaAacagaua.....       | 1     | 1 | seq |
| gggggucucgCagacgaucagaua.....       | 1     | 1 | seq |
| gggggucugaGgacgaucagaua.....        | 4     | 1 | seq |
| Cggggucugaagacgaucagaua.....        | 1     | 1 | seq |
| gggggucugaagacgauUagaua.....        | 2     | 1 | seq |
| gggggucugaagacgaucGgaua.....        | 8     | 1 | seq |
| gggggucugaagacgaCcagaua.....        | 2     | 1 | seq |
| gggggucugaagacgaucagGua.....        | 5     | 1 | seq |
| ggUgggucugaagacgaucagaua.....       | 1     | 1 | seq |
| gggggAcugaagacgaucagaua.....        | 3     | 1 | seq |
| gggggucugaagacgGucagaua.....        | 5     | 1 | seq |
| gUgggucugaagacgaucagaua.....        | 2     | 1 | seq |
| Uggggucugaagacgaucagaua.....        | 8     | 1 | seq |
| Nggggucugaagacgaucagaua.....        | 1     | 1 | seq |
| gggggucugaagacgaucagauC.....        | 1     | 1 | seq |
| gggggucugaagacgaucagaua.....        | 1428  | 0 | seq |
| Uggggucugaagacgaucagauac.....       | 2     | 1 | seq |
| gggggucugaagacgaucGgauac.....       | 1     | 1 | seq |
| gggggucugaagacgaucagauCc.....       | 1     | 1 | seq |
| gggggucugaagacgaucagGua.....        | 1     | 1 | seq |
| gggggucugaagacgaucagauaU.....       | 11    | 1 | seq |
| gggggucugaagacgaucagauac.....       | 165   | 0 | seq |
| gggggucugaCgacgaucagauac.....       | 1     | 1 | seq |
| gggggucgGagacgaucagauac.....        | 2     | 1 | seq |
| gggggcuUgaagacgaucagauacc.....      | 1     | 1 | seq |
| gggggucugaagacgaucagauacA.....      | 33    | 1 | seq |
| gggggucugaCgacgaucagauacc.....      | 1     | 1 | seq |
| gggggucugaagacgGucagauacc.....      | 3     | 1 | seq |
| gggggucugaagacgaucGgauacc.....      | 4     | 1 | seq |
| gggggucugaagacgaucagauacG.....      | 1     | 1 | seq |
| gAgggucugaagacgaucagauacc.....      | 1     | 1 | seq |
| gggggucugaGgacgaucagauacc.....      | 5     | 1 | seq |
| gggggUucgaagacgaucagauacc.....      | 2     | 1 | seq |
| gggggucugaagacgaucagauUcc.....      | 1     | 1 | seq |
| gggggucugaagacgaCcagauacc.....      | 1     | 1 | seq |
| gggggucugaagacgaucagauGcc.....      | 3     | 1 | seq |
| gggggucugaagGcgaucagauacc.....      | 2     | 1 | seq |
| gggggucugaagacgaucagaCacc.....      | 1     | 1 | seq |
| gggggucugaagacgaucUgauacc.....      | 2     | 1 | seq |
| Uggggucugaagacgaucagauacc.....      | 4     | 1 | seq |
| gggggucUaagacgaucagauacc.....       | 1     | 1 | seq |
| gggggcCcgaagacgaucagauacc.....      | 3     | 1 | seq |
| gggggucgGagacgaucagauacc.....       | 1     | 1 | seq |
| gggggucugaagacgaucagauacc.....      | 829   | 0 | seq |
| gggggucugaagacgaucagGuaacc.....     | 1     | 1 | seq |
| gggggucugaagacgaucagauaccU.....     | 13    | 1 | seq |
| gggggucugaagacgaucagGuaacca.....    | 1     | 1 | seq |
| gggggucugaagacgaucagagaCacca.....   | 1     | 1 | seq |
| gggggucugaagacgaucagauacca.....     | 82    | 0 | seq |
| gggggucugaagacgauUagauacca.....     | 1     | 1 | seq |
| Uggggucugaagacgaucagauacca.....     | 1     | 1 | seq |
| gggggucugaagacgaucagauaccC.....     | 9     | 1 | seq |
| gggggucugaagacgaucagauGcca.....     | 1     | 1 | seq |
| gggggucugaagacgaucagauaccuU.....    | 1     | 1 | seq |
| gggggucugaagacgaucagauaccCucc.....  | 6     | 1 | seq |
| gggggucugaagacgaucagauaccuacc.....  | 1     | 0 | seq |
| gggggucugaagacgaucagauaccuaccu..... | 3     | 0 | seq |
| gggggucugaagacgaucagauaccuaccA..... | 1     | 1 | seq |
| gggggucugaagacgaucagauaccUuccu..... | 1     | 1 | seq |
| .ggggucugaagacgCuc.....             | 20    | 1 | seq |
| .ggggucugaagacgGuc.....             | 282   | 1 | seq |
| .ggAgcucugaagacgauc.....            | 49    | 1 | seq |
| .ggggucugaagacgaAc.....             | 42    | 1 | seq |
| .Agggucugaagacgauc.....             | 128   | 1 | seq |
| .ggggucugaagacgauc.....             | 78575 | 0 | seq |
| .ggggcuGgaagacgauc.....             | 3     | 1 | seq |
| .gAggcugaagacgauc.....              | 50    | 1 | seq |
| .ggggucgaaCacgauc.....              | 13    | 1 | seq |
| .gggUcucgaagacgauc.....             | 18    | 1 | seq |
| .ggggucugaUgacgauc.....             | 28    | 1 | seq |



## Mature

## Star

gggggucgaagacgaucagauaccuagucuaaccauaaaugaugucgaccagcgauugguggauguuucucuaaggacuccggcagcacc

|                           |      |   |     |
|---------------------------|------|---|-----|
| .gggggucgaagacgaucA.....  | 545  | 1 | seq |
| .gggggucgaagCcgauC.....   | 22   | 1 | seq |
| .gggggucgNagacgauc.....   | 1    | 1 | seq |
| .gggAcucgaagacgauc.....   | 73   | 1 | seq |
| .ggCgcucgaagacgauc.....   | 6    | 1 | seq |
| .gggggucgaaAacgauc.....   | 27   | 1 | seq |
| .gggggcGcgaagacgauc.....  | 13   | 1 | seq |
| .gggggucgaagaGgauc.....   | 21   | 1 | seq |
| .gggggucgaaUacgauc.....   | 17   | 1 | seq |
| .gUggcucgaagacgauc.....   | 32   | 1 | seq |
| .gggggucgaagacgaCc.....   | 641  | 1 | seq |
| .gggggucgCagacgauc.....   | 12   | 1 | seq |
| .gggggucCaaacgauc.....    | 6    | 1 | seq |
| .gggggucgaagacUauc.....   | 24   | 1 | seq |
| .gggggucgaagaAgauc.....   | 15   | 1 | seq |
| .Ngggcucgaagacgauc.....   | 93   | 1 | seq |
| .ggggcuAgaagacgauc.....   | 6    | 1 | seq |
| .ggggcCgaaagacgauc.....   | 216  | 1 | seq |
| .gggggucgaagacgauU.....   | 2303 | 1 | seq |
| .ggggAucgaagacgauc.....   | 1    | 1 | seq |
| .gggggucgGagacgauc.....   | 301  | 1 | seq |
| .gggggucgaGgaacgauc.....  | 284  | 1 | seq |
| .gggggucgaagacgUuc.....   | 44   | 1 | seq |
| .Cgggcucgaagacgauc.....   | 26   | 1 | seq |
| .ggggcAcgaagacgauc.....   | 41   | 1 | seq |
| .gCggcucgaagacgauc.....   | 2    | 1 | seq |
| .ggggGucgaagacgauc.....   | 13   | 1 | seq |
| .gggggucgaagacCauc.....   | 7    | 1 | seq |
| .gggggUucgaagacgauc.....  | 57   | 1 | seq |
| .gggggucgUagacgauc.....   | 25   | 1 | seq |
| .gggggucUaagacgauc.....   | 33   | 1 | seq |
| .gggCucgaagacgauc.....    | 1    | 1 | seq |
| .gggggucgaagacgaGc.....   | 123  | 1 | seq |
| .gggggucgaagUcgauC.....   | 35   | 1 | seq |
| .ggUgcucgaagacgauc.....   | 32   | 1 | seq |
| .gggggucgaaAacgauca.....  | 13   | 1 | seq |
| .gggggucgaagacgaucG.....  | 1299 | 1 | seq |
| .gggggucgaagacgaAca.....  | 23   | 1 | seq |
| .gggggucgaagaGgauca.....  | 11   | 1 | seq |
| .gggggucgaagacgauGa.....  | 5    | 1 | seq |
| .Agggcucgaagacgauca.....  | 87   | 1 | seq |
| .gggggucgaagacgaucC.....  | 67   | 1 | seq |
| .gggggucgaGgaacgauca..... | 175  | 1 | seq |
| .gggCucgaagacgauca.....   | 1    | 1 | seq |
| .gggggucgaagacgUuca.....  | 21   | 1 | seq |
| .ggUgcucgaagacgauca.....  | 14   | 1 | seq |
| .gggggucgaaCacgauca.....  | 4    | 1 | seq |
| .gggggucgaagacCauca.....  | 7    | 1 | seq |
| .ggggGucgaagacgauca.....  | 12   | 1 | seq |
| .gggggucgaagUcgauca.....  | 12   | 1 | seq |
| .gggggucgaagaAgauca.....  | 11   | 1 | seq |
| .gggggucgaagacgCuca.....  | 17   | 1 | seq |
| .gggAcucgaagacgauca.....  | 49   | 1 | seq |
| .gggggucUaagacgauca.....  | 10   | 1 | seq |
| .gAggcucgaagacgauca.....  | 40   | 1 | seq |
| .gggUcucgaagacgauca.....  | 10   | 1 | seq |
| .gggggucgaaUacgauca.....  | 13   | 1 | seq |
| .gggggucgaagacgaGca.....  | 59   | 1 | seq |
| .ggggcGcgaagacgauca.....  | 11   | 1 | seq |
| .gggggucgaagCcgauca.....  | 8    | 1 | seq |
| .Cgggcucgaagacgauca.....  | 19   | 1 | seq |
| .ggAgcucgaagacgauca.....  | 30   | 1 | seq |
| .ggggcCgaaagacgauca.....  | 146  | 1 | seq |
| .gggggucgaagacgaucU.....  | 231  | 1 | seq |
| .ggggcuAgaagacgauca.....  | 3    | 1 | seq |
| .ggggcAcgaagacgauca.....  | 21   | 1 | seq |
| .ggCgcucgaagacgauca.....  | 3    | 1 | seq |
| .gggggucgaagacgaCca.....  | 281  | 1 | seq |
| .gUggcucgaagacgauca.....  | 33   | 1 | seq |
| .gggggucgaagacgauAa.....  | 9    | 1 | seq |

## Mature

## Star

gggggcucgaagacgaucagauaccuagucucaaccuauaaugaugucgaccagcgauugguggauguuucucuaaggacuccggcagcacc

|                             |       |   |     |
|-----------------------------|-------|---|-----|
| .ggggAucgaagacgauca.....    | 2     | 1 | seq |
| .ggggcucgaagacUauca.....    | 12    | 1 | seq |
| .Ngggcucgaagacgauca.....    | 51    | 1 | seq |
| .ggggcuGgaagacgauca.....    | 2     | 1 | seq |
| .ggggcucgaUgacgauca.....    | 15    | 1 | seq |
| .ggggcucgaagacgauUa.....    | 54    | 1 | seq |
| .ggggcucgUagacgauca.....    | 19    | 1 | seq |
| .ggggcucCaagacgauca.....    | 7     | 1 | seq |
| .ggggUucgaagacgauca.....    | 36    | 1 | seq |
| .ggggcucgaagacgGuca.....    | 165   | 1 | seq |
| .gCgggcucgaagacgauca.....   | 7     | 1 | seq |
| .ggggcucgaagacgauca.....    | 49675 | 0 | seq |
| .ggggcucgCagacgauca.....    | 9     | 1 | seq |
| .ggggcucgGagacgauca.....    | 205   | 1 | seq |
| .ggggcucgaagacgauGag.....   | 1     | 1 | seq |
| .ggUgcucgaagacgaucag.....   | 1     | 1 | seq |
| .ggggcucgUagacgaucag.....   | 4     | 1 | seq |
| .ggggcucgaagacgaucCg.....   | 4     | 1 | seq |
| .Ngggcucgaagacgaucag.....   | 10    | 1 | seq |
| .ggggcucgaagacgaucaC.....   | 26    | 1 | seq |
| .ggggcuAgaagacgaucag.....   | 1     | 1 | seq |
| .ggggUucgaagacgaucag.....   | 6     | 1 | seq |
| .ggAgcucgaagacgaucag.....   | 8     | 1 | seq |
| .ggggcucgaGgacgaucag.....   | 35    | 1 | seq |
| .ggggcucgaagacgauUag.....   | 9     | 1 | seq |
| .gggAcucgaagacgaucag.....   | 7     | 1 | seq |
| .ggggcucgaagacCaucag.....   | 1     | 1 | seq |
| .Agggcucgaagacgaucag.....   | 15    | 1 | seq |
| .ggggcucgGagacgaucag.....   | 31    | 1 | seq |
| .gggUcucgaagacgaucag.....   | 3     | 1 | seq |
| .gCgggcucgaagacgaucag.....  | 2     | 1 | seq |
| .ggggcucgaagGcgauca.....    | 32    | 1 | seq |
| .ggggcucgaaUacgaucag.....   | 1     | 1 | seq |
| .ggggcucgaagacgauAag.....   | 1     | 1 | seq |
| .ggggcucgaagacgaGcag.....   | 3     | 1 | seq |
| .ggggcuGgaagacgaucag.....   | 1     | 1 | seq |
| .ggggcucgaagacgaucag.....   | 8794  | 0 | seq |
| .ggggcucgaUgacgaucag.....   | 4     | 1 | seq |
| .ggggcucgaagaGgaucag.....   | 3     | 1 | seq |
| .gUggcucgaagacgaucag.....   | 5     | 1 | seq |
| .Ugggcucgaagacgaucag.....   | 8     | 1 | seq |
| .ggggcucgaagacgGuca.....    | 31    | 1 | seq |
| .ggggcucgaagacgaAacag.....  | 2     | 1 | seq |
| .Cgggcucgaagacgaucag.....   | 3     | 1 | seq |
| .ggggcucUaagacgaucag.....   | 2     | 1 | seq |
| .ggggcucgaagacgaCcag.....   | 16    | 1 | seq |
| .ggggcucgaagacgaucGg.....   | 45    | 1 | seq |
| .ggggcCcgaaagacgaucag.....  | 24    | 1 | seq |
| .ggggcucgaagUcgauca.....    | 2     | 1 | seq |
| .gAggcucgaagacgaucag.....   | 8     | 1 | seq |
| .ggggcucgaagaAgaucag.....   | 5     | 1 | seq |
| .ggggcucgaagacgUucag.....   | 5     | 1 | seq |
| .ggggcAcgaagacgaucag.....   | 4     | 1 | seq |
| .ggggcucgaagacUaucag.....   | 1     | 1 | seq |
| .ggggcucgaagacgaucUg.....   | 8     | 1 | seq |
| .ggggcucgaaAacgaucag.....   | 4     | 1 | seq |
| .ggggcucgaagacgGuca.....    | 17    | 1 | seq |
| .ggggcucgaagacgaGcaga.....  | 2     | 1 | seq |
| .ggggcucgaCgacgaucaga.....  | 1     | 1 | seq |
| .ggggcucgaagacgaucagG.....  | 119   | 1 | seq |
| .gggCucgaagacgaucaga.....   | 2     | 1 | seq |
| .ggggcCcgaaagacgaucaga..... | 1     | 1 | seq |
| .ggggcucgaagacgaAcaga.....  | 3     | 1 | seq |
| .ggggcucgaagacgaucagC.....  | 7     | 1 | seq |
| .ggggcucgCagacgaucaga.....  | 1     | 1 | seq |
| .ggggcucgaagaAgaucaga.....  | 1     | 1 | seq |
| .ggggcucgUagacgaucaga.....  | 2     | 1 | seq |
| .ggAgcucgaagacgaucaga.....  | 2     | 1 | seq |
| .Ugggcucgaagacgaucaga.....  | 8     | 1 | seq |
| .ggggcAcgaagacgaucaga.....  | 1     | 1 | seq |

## Mature

## Star

gggggcucgaagacgaucagauaccuagucucaaccauaaaugaugucgaccagcgauugguggauguuucucuaaggacuccggcagcacc

|                               |      |   |     |
|-------------------------------|------|---|-----|
| .ggggUcgaagacgaucaga. ....    | 4    | 1 | seq |
| .ggggcucgaagacgaucaga. ....   | 5516 | 0 | seq |
| .ggggcucgaagacgUucaga. ....   | 6    | 1 | seq |
| .ggUgcucgaagacgaucaga. ....   | 5    | 1 | seq |
| .gggUcucgaagacgaucaga. ....   | 1    | 1 | seq |
| .ggggcucgaagCcgauacaga. ....  | 1    | 1 | seq |
| .ggggcucgaagacgaucUga. ....   | 3    | 1 | seq |
| .gCggcucgaagacgaucaga. ....   | 1    | 1 | seq |
| .ggggcucgaaAacgaucaga. ....   | 5    | 1 | seq |
| .gggAcucgaagacgaucaga. ....   | 5    | 1 | seq |
| .ggggcucgaUgacgaucaga. ....   | 2    | 1 | seq |
| .ggggcucgaagacgaucGga. ....   | 22   | 1 | seq |
| .ggggcucgaaUacgaucaga. ....   | 2    | 1 | seq |
| .ggggcCcgaaagacgaucaga. ....  | 20   | 1 | seq |
| .ggggcucgaagacUaucaga. ....   | 1    | 1 | seq |
| .ggggcucgaagacgCucaga. ....   | 1    | 1 | seq |
| .ggggcucgaagUcgaucaga. ....   | 4    | 1 | seq |
| .ggggcucgaagacgauUaga. ....   | 4    | 1 | seq |
| .Ngggcucgaagacgaucaga. ....   | 5    | 1 | seq |
| .ggggcucgaagacgaCcaga. ....   | 25   | 1 | seq |
| .ggggGucgaagacgaucaga. ....   | 2    | 1 | seq |
| .ggggcucgGagacgaucaga. ....   | 19   | 1 | seq |
| .gAggcucgaagacgaucaga. ....   | 4    | 1 | seq |
| .ggggcucgaagacgaucagU. ....   | 25   | 1 | seq |
| .ggggcucgaagacgaucCga. ....   | 2    | 1 | seq |
| .ggggcucgaagGcgauacaga. ....  | 18   | 1 | seq |
| .Cgggcucgaagacgaucaga. ....   | 1    | 1 | seq |
| .Agggcucgaagacgaucaga. ....   | 6    | 1 | seq |
| .ggggcucgaGgacgaucaga. ....   | 24   | 1 | seq |
| .ggggcucgaagacgaucCa. ....    | 2    | 1 | seq |
| .gUggcucgaagacgaucaga. ....   | 1    | 1 | seq |
| .Ugggcucgaagacgaucagau. ....  | 6    | 1 | seq |
| .ggggcCcgaaagacgaucagau. .... | 3    | 1 | seq |
| .ggggcucgaagacgaCcagau. ....  | 3    | 1 | seq |
| .ggUgcucgaagacgaucagau. ....  | 1    | 1 | seq |
| .ggggcucgaagGgaucagau. ....   | 1    | 1 | seq |
| .gggUcucgaagacgaucagau. ....  | 3    | 1 | seq |
| .gUggcucgaagacgaucagau. ....  | 1    | 1 | seq |
| .ggggcucgaUgacgaucagau. ....  | 1    | 1 | seq |
| .ggggcucgaagGcgaucagau. ....  | 3    | 1 | seq |
| .Ngggcucgaagacgaucagau. ....  | 1    | 1 | seq |
| .ggggcucgaagacgaucagGu. ....  | 12   | 1 | seq |
| .ggggcucgGagacgaucagau. ....  | 6    | 1 | seq |
| .ggggcucUaagacgaucagau. ....  | 1    | 1 | seq |
| .ggggcucgaagacgaucagaA. ....  | 11   | 1 | seq |
| .ggggUcgaagacgaucagau. ....   | 2    | 1 | seq |
| .ggggcAcgaagacgaucagau. ....  | 1    | 1 | seq |
| .ggggcucgaGgacgaucagau. ....  | 8    | 1 | seq |
| .ggggcucgaaAacgaucagau. ....  | 3    | 1 | seq |
| .Cgggcucgaagacgaucagau. ....  | 1    | 1 | seq |
| .gAggcucgaagacgaucagau. ....  | 1    | 1 | seq |
| .Agggcucgaagacgaucagau. ....  | 1    | 1 | seq |
| .ggggcucgaagacgauUagau. ....  | 2    | 1 | seq |
| .ggggcucgaagacgaucGgau. ....  | 5    | 1 | seq |
| .ggggcucgaagacgaGcagau. ....  | 1    | 1 | seq |
| .ggggcucgaagacgaucagaG. ....  | 16   | 1 | seq |
| .ggggcucgaagacgaucagaC. ....  | 225  | 1 | seq |
| .ggggcucgaagacgaucagau. ....  | 1736 | 0 | seq |
| .ggggcucgaagacgGuacagau. .... | 1    | 1 | seq |
| .ggggcucgaagacgaucagCu. ....  | 1    | 1 | seq |
| .ggggcucgaagacgCucagau. ....  | 2    | 1 | seq |
| .ggggcuGgaagacgaucagaua. .... | 1    | 1 | seq |
| .ggggcucgaagacgaAcagaua. .... | 1    | 1 | seq |
| .Ugggcucgaagacgaucagaua. .... | 5    | 1 | seq |
| .ggggcucgaGgacgaucagaua. .... | 7    | 1 | seq |
| .Agggcucgaagacgaucagaua. .... | 6    | 1 | seq |
| .ggggcucgGagacgaucagaua. .... | 11   | 1 | seq |
| .ggggcucgaaAacgaucagaua. .... | 4    | 1 | seq |
| .Ngggcucgaagacgaucagaua. .... | 3    | 1 | seq |
| .ggggcucgaagCcgaucagaua. .... | 1    | 1 | seq |

## Mature

## Star

gggggcucgaagacgaucagauaccuagucuaaccuauaaugaugucgaccagcgauugguggauguuucucuaaggacuccggcagcacc

|                                   |      |   |     |
|-----------------------------------|------|---|-----|
| .gggggcucgaagacgaucagUua.....     | 1    | 1 | seq |
| .gggggcugaaUacgaucagaua.....      | 1    | 1 | seq |
| .ggggcuAgaagacgaucagaua.....      | 1    | 1 | seq |
| .gggggcucgaagacgaucagauG.....     | 21   | 1 | seq |
| .ggUgcucgaagacgaucagaua.....      | 2    | 1 | seq |
| .gggggcucgaagUcgaucagaua.....     | 1    | 1 | seq |
| .gggggcucgaagacgaucGgaua.....     | 1    | 1 | seq |
| .gggggcucgaagacgaucagaua.....     | 2404 | 0 | seq |
| .gggAcucgaagacgaucagaua.....      | 3    | 1 | seq |
| .gggggcucgaagacgGucagaua.....     | 3    | 1 | seq |
| .gggggcucgaagacgaucagGua.....     | 6    | 1 | seq |
| .gggggcucgaagGcgaucagaua.....     | 3    | 1 | seq |
| .ggAgcucgaagacgaucagaua.....      | 1    | 1 | seq |
| .gggggcucgaagacgaucGgaua.....     | 11   | 1 | seq |
| .ggggcCcgaagacgaucagaua.....      | 7    | 1 | seq |
| .gggggcucgaagacgaucagaCa.....     | 21   | 1 | seq |
| .gggggcucgUagacgaucagaua.....     | 2    | 1 | seq |
| .gggggcucgaagacUaucagaua.....     | 2    | 1 | seq |
| .gggggcucgaagacgauGagaua.....     | 1    | 1 | seq |
| .gggggcucgaagacgaucagauU.....     | 9    | 1 | seq |
| .gggggcucgaagacgaCcagaua.....     | 6    | 1 | seq |
| .gggggcucgaUgacgaucagaua.....     | 1    | 1 | seq |
| .Cgggcucgaagacgaucagaua.....      | 1    | 1 | seq |
| .gggggcucUaagacgaucagaua.....     | 2    | 1 | seq |
| .gUgggcucgaagacgaucagaua.....     | 2    | 1 | seq |
| .gggggcucgaagaGgaucagaua.....     | 1    | 1 | seq |
| .gggggcucgaagacgaucagaGa.....     | 1    | 1 | seq |
| .gggUcucgaagacgaucagaua.....      | 1    | 1 | seq |
| .gggggcucgaagacgaucagCua.....     | 1    | 1 | seq |
| .gggggcucgaagacgauUagaua.....     | 5    | 1 | seq |
| .gAggcucgaagacgaucagaua.....      | 4    | 1 | seq |
| .gggggcucgaagacgaucagauaA.....    | 1    | 1 | seq |
| .gggggcucgaagacgaucagauac.....    | 278  | 0 | seq |
| .gggggcucgaGgaucagauauac.....     | 2    | 1 | seq |
| .gggggcucgaagGcgaucagauauac.....  | 3    | 1 | seq |
| .gggggcucgaagacgaucagauGc.....    | 2    | 1 | seq |
| .gggggcucgaagacgaucGgauac.....    | 1    | 1 | seq |
| .ggggcCcgaagacgaucagauauac.....   | 1    | 1 | seq |
| .Aggggcucgaagacgaucagauauac.....  | 1    | 1 | seq |
| .gggggcucgaagacgaucagaCac.....    | 3    | 1 | seq |
| .gggggcucgaUgacgaucagauauac.....  | 1    | 1 | seq |
| .gggggcUgaagacgaucagauauac.....   | 1    | 1 | seq |
| .gggggcucgaagacgaucagauaU.....    | 9    | 1 | seq |
| .gggggcucgGagacgaucagauauac.....  | 1    | 1 | seq |
| .gggggcucgaagacgaucagaCacc.....   | 1    | 1 | seq |
| .gggggcucgaagacgaucagUuacc.....   | 1    | 1 | seq |
| .gggggcucgaagacgaCcagauuacc.....  | 1    | 1 | seq |
| .gggggcucgaagacgaGcagauuacc.....  | 1    | 1 | seq |
| .gggggcucgaagacgaucagauaAc.....   | 1    | 1 | seq |
| .gggggcucgaagacgaucGgauuacc.....  | 2    | 1 | seq |
| .gggggcucgaagacgaucagauuacc.....  | 577  | 0 | seq |
| .gggggcucgaagacgaucagauacG.....   | 1    | 1 | seq |
| .gggggcucgaagacgaucagauacA.....   | 13   | 1 | seq |
| .gggggcucgaagacgaAcagauuacc.....  | 1    | 1 | seq |
| .gggggcucgaagacgGucagauuacc.....  | 2    | 1 | seq |
| .ggggcAcgaagacgaucagauuacc.....   | 1    | 1 | seq |
| .gggggcucgaGgacgaucagauuacc.....  | 1    | 1 | seq |
| .gggggcUgaagacgaucagauuacc.....   | 2    | 1 | seq |
| .gggggcucgaagGcgaucagauuacc.....  | 2    | 1 | seq |
| .gggggUucgaagacgaucagauuacc.....  | 1    | 1 | seq |
| .gggggcucgaagacgaucagGuacc.....   | 1    | 1 | seq |
| .gUgggcucgaagacgaucagauuacc.....  | 1    | 1 | seq |
| .gggggcucgaagacgaucagauacca.....  | 120  | 0 | seq |
| .gggggcucgGagacgaucagauacca.....  | 1    | 1 | seq |
| .gggggcucgaagacgaucagauuaccC..... | 11   | 1 | seq |
| .gggggcucgaagacgaCcagauacca.....  | 1    | 1 | seq |
| .gggggcucUaagacgaucagauacca.....  | 1    | 1 | seq |
| .gggggcucgaagacgaucagauuaccU..... | 19   | 1 | seq |
| .gggggcucgaagacgaucagauaAa.....   | 1    | 1 | seq |
| .gggggcucgaagacgaucagGuacca.....  | 1    | 1 | seq |

## Mature

## Star

gggggcucgaagacgaucagauaccauccuagucuaaccauaaaugaugucgaccagcgauugguggauguuucucuaaggacuccggcagcacc

|                                       |       |   |     |
|---------------------------------------|-------|---|-----|
| .gggggcucgaagacgaucagauaccGa.....     | 1     | 1 | seq |
| .gggggcucgaGgacgaucagauacca.....      | 2     | 1 | seq |
| .gggggcucgaagacgaucagauaccauc.....    | 1     | 0 | seq |
| .gggggcucgaagacgaucagauaccUuc.....    | 1     | 1 | seq |
| .gggggcucgaagacgaucagauaccaAc.....    | 1     | 1 | seq |
| .gggggcucgaagacgaucagauaccCucc.....   | 5     | 1 | seq |
| .gggggcucgaagacgaucagauaccauccua..... | 1     | 0 | seq |
| .gggggcucgaagacgaucagauaccUuccua..... | 1     | 1 | seq |
| .gggggcucgaagacGgauc.....             | 3     | 1 | seq |
| .Cgggcucgaagacgauc.....               | 17    | 1 | seq |
| .gCgcucgaagacgauc.....                | 3     | 1 | seq |
| .ggggcucgaagacgauUa.....              | 16    | 1 | seq |
| .ggggcucgaagacgauc.....               | 30483 | 0 | seq |
| .ggCucgaagacgauc.....                 | 1     | 1 | seq |
| .ggggcucUaagacgauc.....               | 5     | 1 | seq |
| .ggggcucgaagacgaucG.....              | 868   | 1 | seq |
| .ggggcCgaagacgauc.....                | 74    | 1 | seq |
| .ggggcucgaagacgCuca.....              | 11    | 1 | seq |
| .ggggcucgaaUacgauc.....               | 1     | 1 | seq |
| .ggAcucgaagacgauc.....                | 44    | 1 | seq |
| .ggggcucgaagacgaAca.....              | 15    | 1 | seq |
| .ggggcucgCagacgauc.....               | 3     | 1 | seq |
| .ggggcucgaagacgaucU.....              | 174   | 1 | seq |
| .ggggcucgaagCcgauca.....              | 3     | 1 | seq |
| .ggggcucgaagacgauGa.....              | 6     | 1 | seq |
| .gUgcucgaagacgauc.....                | 8     | 1 | seq |
| .ggggcucgaagUcgauc.....               | 4     | 1 | seq |
| .ggggcAcgaagacgauc.....               | 13    | 1 | seq |
| .ggggcucCaagacgauc.....               | 1     | 1 | seq |
| .ggggcucgaGgacgauc.....               | 125   | 1 | seq |
| .Ngggcucgaagacgauc.....               | 34    | 1 | seq |
| .ggggcucgUagacgauc.....               | 7     | 1 | seq |
| .ggggcucgaagacgaCca.....              | 190   | 1 | seq |
| .ggggcuGgaagacgauc.....               | 1     | 1 | seq |
| .ggggcucgaagacgGuca.....              | 123   | 1 | seq |
| .ggggcucgGagacgauc.....               | 81    | 1 | seq |
| .gggGucgaagacgauc.....                | 7     | 1 | seq |
| .ggggcucgaagacgaucC.....              | 41    | 1 | seq |
| .ggggcucgaaAacgauc.....               | 8     | 1 | seq |
| .Ugggcucgaagacgauc.....               | 23    | 1 | seq |
| .ggggcucgaagacgUuca.....              | 16    | 1 | seq |
| .ggggcucgaagacUauc.....               | 12    | 1 | seq |
| .ggggcucgaagacgaGca.....              | 35    | 1 | seq |
| .ggggcGcgaagacgauc.....               | 3     | 1 | seq |
| .ggggcucgaUgacgauc.....               | 10    | 1 | seq |
| .ggggcucgaagacgauAa.....              | 3     | 1 | seq |
| .gggUucgaagacgauc.....                | 28    | 1 | seq |
| .Aggcucgaagacgauc.....                | 49    | 1 | seq |
| .ggUucgaagacgauc.....                 | 8     | 1 | seq |
| .ggggcuAgaagacgauc.....               | 3     | 1 | seq |
| .ggggcucgaagacgaucGg.....             | 2     | 1 | seq |
| .ggggcucUaagacgaucag.....             | 1     | 1 | seq |
| .ggggcuGgaagacgaucag.....             | 1     | 1 | seq |
| .ggggcucgaagacUaucag.....             | 1     | 1 | seq |
| .Aggcucgaagacgaucag.....              | 11    | 1 | seq |
| .ggggcucgaagGcgauacag.....            | 15    | 1 | seq |
| .ggggcucgaagacgaucUg.....             | 4     | 1 | seq |
| .gggGucgaagacgaucag.....              | 1     | 1 | seq |
| .ggggcucgaagacgauUag.....             | 6     | 1 | seq |
| .ggUucgaagacgaucag.....               | 1     | 1 | seq |
| .ggggcucgaagacgaucag.....             | 1     | 1 | seq |
| .gUgcucgaagacgaucag.....              | 2     | 1 | seq |
| .ggggcucgaagacgUucag.....             | 3     | 1 | seq |
| .ggggcucgGagacgaucag.....             | 23    | 1 | seq |
| .Ngggcucgaagacgaucag.....             | 1     | 1 | seq |
| .gggUucgaagacgaucag.....              | 5     | 1 | seq |
| .gCgcucgaagacgaucag.....              | 2     | 1 | seq |
| .ggggcucgaaUacgaucag.....             | 3     | 1 | seq |
| .ggggcucgaGgacgaucag.....             | 19    | 1 | seq |
| .ggggcucgaagacgauGag.....             | 1     | 1 | seq |

## Mature

## Star

gggggcugaagacgaucagauaccuagucuaaccauaaaugaugucgaccagcgauugguggauguuucucuaaggacuccggcagcacc

|                             |      |   |     |
|-----------------------------|------|---|-----|
| .gAgcucgaagacgaucag.....    | 4    | 1 | seq |
| .ggggcugaagacgaAacag.....   | 1    | 1 | seq |
| .ggggcugaagacgGucag.....    | 14   | 1 | seq |
| .ggggcugaagacgaucGg.....    | 30   | 1 | seq |
| .ggggcugaagacgaucag.....    | 5766 | 0 | seq |
| .ggggcugaagUcgauacag.....   | 1    | 1 | seq |
| .ggggcugUagacgaucag.....    | 2    | 1 | seq |
| .ggggcCcgaaagacgaucag.....  | 14   | 1 | seq |
| .Cgggcugaagacgaucag.....    | 1    | 1 | seq |
| .gggcuAgaagacgaucag.....    | 1    | 1 | seq |
| .ggAcucgaagacgaucag.....    | 5    | 1 | seq |
| .ggggcugaagacgCucag.....    | 1    | 1 | seq |
| .ggggcugaagaAgaucag.....    | 2    | 1 | seq |
| .ggggcugaagacgaCcag.....    | 16   | 1 | seq |
| .ggggcAcgaagacgaucag.....   | 2    | 1 | seq |
| .ggggcugaagacgaucac.....    | 14   | 1 | seq |
| .Ugggcugaagacgaucag.....    | 12   | 1 | seq |
| .ggggcugaUgacgaucaga.....   | 7    | 1 | seq |
| .ggggcugaGgacgaucaga.....   | 16   | 1 | seq |
| .ggggcugaagacgaAacaga.....  | 3    | 1 | seq |
| .Cgggcugaagacgaucaga.....   | 4    | 1 | seq |
| .ggggcugaagCcgauacaga.....  | 2    | 1 | seq |
| .Ngggcugaagacgaucaga.....   | 6    | 1 | seq |
| .ggggcugaagacUaucaga.....   | 1    | 1 | seq |
| .gggcuGgaagacgaucaga.....   | 1    | 1 | seq |
| .ggUcucgaagacgaucaga.....   | 2    | 1 | seq |
| .ggggcUaaagacgaucaga.....   | 1    | 1 | seq |
| .Agggcugaagacgaucaga.....   | 14   | 1 | seq |
| .ggggcugaagacgaucUga.....   | 3    | 1 | seq |
| .ggggcugGagacgaucaga.....   | 17   | 1 | seq |
| .gUgcugaagacgaucaga.....    | 2    | 1 | seq |
| .ggggcugaagacgaucagG.....   | 88   | 1 | seq |
| .ggggcugaagacgaUGaga.....   | 2    | 1 | seq |
| .ggggcugaagacgaucagC.....   | 4    | 1 | seq |
| .ggggcugaagacgaUaga.....    | 7    | 1 | seq |
| .gggcuAgaagacgaucaga.....   | 1    | 1 | seq |
| .gggcGcgaagacgaucaga.....   | 2    | 1 | seq |
| .gAgcucgaagacgaucaga.....   | 4    | 1 | seq |
| .ggggcCaaagacgaucaga.....   | 1    | 1 | seq |
| .ggggcugaagacgaucaga.....   | 4731 | 0 | seq |
| .ggggcugaagacgaCcaga.....   | 10   | 1 | seq |
| .ggggcugaagacgGucaga.....   | 15   | 1 | seq |
| .ggggcugaagacgaucCga.....   | 3    | 1 | seq |
| .ggggcAcgaagacgaucaga.....  | 3    | 1 | seq |
| .ggggcugaagacgaucacCa.....  | 6    | 1 | seq |
| .ggggcugaagacgaGcaga.....   | 2    | 1 | seq |
| .ggggcugaagaGgaucaga.....   | 1    | 1 | seq |
| .ggggcugaagacgaucagU.....   | 29   | 1 | seq |
| .ggAcucgaagacgaucaga.....   | 8    | 1 | seq |
| .ggggcugaagGcgauacaga.....  | 16   | 1 | seq |
| .ggggcugaagacgaucGga.....   | 15   | 1 | seq |
| .gggcCcgaaagacgaucaga.....  | 16   | 1 | seq |
| .Ugggcugaagacgaucaga.....   | 5    | 1 | seq |
| .gggUcgaagacgaucagau.....   | 2    | 1 | seq |
| .ggggcugaagacgaucagaA.....  | 12   | 1 | seq |
| .ggggcugaagacgGucagau.....  | 7    | 1 | seq |
| .ggggcugaagacgaucagCu.....  | 1    | 1 | seq |
| .ggggcugaagacgaucagaC.....  | 206  | 1 | seq |
| .Ugggcugaagacgaucagau.....  | 1    | 1 | seq |
| .ggggcugaagGcgauacagau..... | 4    | 1 | seq |
| .ggCcucgaagacgaucagau.....  | 1    | 1 | seq |
| .ggggcugaUgacgaucagau.....  | 1    | 1 | seq |
| .Agggcugaagacgaucagau.....  | 4    | 1 | seq |
| .ggAcucgaagacgaucagau.....  | 2    | 1 | seq |
| .gggcCcgaaagacgaucagau..... | 4    | 1 | seq |
| .ggggcugUagacgaucagau.....  | 2    | 1 | seq |
| .ggggcugaagacgaucagGu.....  | 7    | 1 | seq |
| .ggggcugaagacgaucacCau..... | 1    | 1 | seq |
| .ggggcugGagacgaucagau.....  | 7    | 1 | seq |
| .ggggcugaagacgaCcagau.....  | 3    | 1 | seq |

## Mature

## Star

gggggcugaagacgaucagauaccuagucucaaccauaaaugaugucgaccagcgauugguggauguuucucuaaggacuccggcagcacc

|                                         |      |   |     |
|-----------------------------------------|------|---|-----|
| .gggcucgaagacgaAacgau.....              | 1    | 1 | seq |
| .gggcucgaagacgaucagaG.....              | 20   | 1 | seq |
| .Nggcucgaagacgaucagau.....              | 3    | 1 | seq |
| .gggcucgaGgacgaucagau.....              | 10   | 1 | seq |
| .gggcucgaagacgaucagUu.....              | 1    | 1 | seq |
| .gggcucgaagacgaUGau.....                | 1    | 1 | seq |
| .gggUcucgaagacgaucagau.....             | 1    | 1 | seq |
| .gggcucgaaUacgaucagau.....              | 1    | 1 | seq |
| .gggcucgaagacgaucagau.....              | 1622 | 0 | seq |
| .gggcucgaagacgaucGgau.....              | 1    | 1 | seq |
| .gggcucgaagacgaucUgau.....              | 4    | 1 | seq |
| .gggcucgaagacgaucCgau.....              | 1    | 1 | seq |
| .gggcucgaagacgGucagaua.....             | 9    | 1 | seq |
| .gggcucgGagacgaucagaua.....             | 11   | 1 | seq |
| .ggAucgaagacgaucagaua.....              | 3    | 1 | seq |
| .Aggcucgaagacgaucagaua.....             | 3    | 1 | seq |
| .Uggcucgaagacgaucagaua.....             | 1    | 1 | seq |
| .gggUucgaagacgaucagaua.....             | 2    | 1 | seq |
| .gggcuAgaagacgaucagaua.....             | 1    | 1 | seq |
| .gggcucgaGgacgaucagaua.....             | 12   | 1 | seq |
| .gggcucgaagacgaCagaua.....              | 7    | 1 | seq |
| .gggcucgaagacgaucagaua.....             | 2652 | 0 | seq |
| .gggcCcgaaagacgaucagaua.....            | 4    | 1 | seq |
| .Cggcucgaagacgaucagaua.....             | 2    | 1 | seq |
| .gggGucgaagacgaucagaua.....             | 1    | 1 | seq |
| .gggcucgaagacgaucagaGa.....             | 1    | 1 | seq |
| .gAgcucgaagacgaucagaua.....             | 6    | 1 | seq |
| .gggcucgaagacgaucGgau.....              | 6    | 1 | seq |
| .gggcucgaagGcgaucaua.....               | 7    | 1 | seq |
| .gggcucgaagacgaucagGua.....             | 7    | 1 | seq |
| .gggcucgaagacgaucagauU.....             | 6    | 1 | seq |
| .gggcucgaaUacgaucagaua.....             | 1    | 1 | seq |
| .gggcucgaagacgaucagUua.....             | 1    | 1 | seq |
| .gggcucgaagacgaucagaCa.....             | 13   | 1 | seq |
| .gggcucgaagacgaGcagaua.....             | 1    | 1 | seq |
| .gggcucgaagacgaucagauG.....             | 24   | 1 | seq |
| .gggAucgaagacgaucagaua.....             | 1    | 1 | seq |
| .gggcucgaagacgCucagaua.....             | 1    | 1 | seq |
| .gggcucgaagacgaucUgaua.....             | 1    | 1 | seq |
| .gggcucgUagacgaucagaua.....             | 2    | 1 | seq |
| .gUgcucgaagacgaucagaua.....             | 1    | 1 | seq |
| .gggcucgaaUacgaucagauac.....            | 1    | 1 | seq |
| .gggcucgaagUcgaucagauac.....            | 1    | 1 | seq |
| .Nggcucgaagacgaucagauac.....            | 1    | 1 | seq |
| .gggcucgaagacgaucagauac.....            | 244  | 0 | seq |
| .gggcucgaagaGgaucagauac.....            | 1    | 1 | seq |
| .gggcucgaagacgaucagauGc.....            | 2    | 1 | seq |
| .gggcucgaagacgaucagauaU.....            | 9    | 1 | seq |
| .gggcucgaagacgaucGgauac.....            | 2    | 1 | seq |
| .gggcucgaagacgaucagauaA.....            | 2    | 1 | seq |
| .gggcucgaagacgaucagauacG.....           | 1    | 1 | seq |
| .gggcucgaagacgaucagauacc.....           | 103  | 0 | seq |
| .gggcucgaagacgaucagaCacc.....           | 1    | 1 | seq |
| .gggcucgaagacgaucagauacA.....           | 4    | 1 | seq |
| .gggcucgaagacgaucagauaccC.....          | 3    | 1 | seq |
| .gggcucgaagacgaucagauacca.....          | 9    | 0 | seq |
| .gggcucgaagacgaucagauaccU.....          | 1    | 1 | seq |
| .gggcucgaagacgaucagaCacca.....          | 1    | 1 | seq |
| .gggcucgaagacgaucagauaccaucc.....       | 1    | 0 | seq |
| .gggcucgaagacgaucagauaccUuccua.....     | 2    | 1 | seq |
| .gggcucgaagacgaucagauaccauccuagu.....   | 1    | 0 | seq |
| .gggcucgaagacgaucagauaccauccuagucu..... | 1    | 0 | seq |
| ..ggGucgaagacgaucag.....                | 1    | 1 | seq |
| ..gAucgaagacgaucag.....                 | 2    | 1 | seq |
| ..ggcCcgaaagacgaucag.....               | 1    | 1 | seq |
| ..Ugcucgaagacgaucag.....                | 2    | 1 | seq |
| ..ggcucgaagacgaucGg.....                | 5    | 1 | seq |
| ..ggcucgaagacgaucag.....                | 927  | 0 | seq |
| ..ggcucgaGgacgaucag.....                | 7    | 1 | seq |
| ..ggcucgaagacgaCag.....                 | 1    | 1 | seq |

## Mature

## Star

gggggcucgaagacgaucagauaccuagucucaaccauaaaugaugucgaccagcgauugguggauguuucucuaaggacuccggcgagcacc

|                             |      |   |     |
|-----------------------------|------|---|-----|
| ..ggcucgaaAacgaucag.....    | 1    | 1 | seq |
| ..ggcucgaagacgGucag.....    | 3    | 1 | seq |
| ..ggcAcgaagacgaucag.....    | 1    | 1 | seq |
| ..ggcucgaagaAgaucag.....    | 2    | 1 | seq |
| ..Ngcucgaagacgaucag.....    | 1    | 1 | seq |
| ..ggcucgaagGcgaucag.....    | 4    | 1 | seq |
| ..ggcucgaagacgUucag.....    | 2    | 1 | seq |
| ..ggcucgaagacgaucaC.....    | 2    | 1 | seq |
| ..ggcucgGagacgaucag.....    | 7    | 1 | seq |
| ..Agcucgaagacgaucag.....    | 1    | 1 | seq |
| ..ggcucgaagacgauUag.....    | 3    | 1 | seq |
| ..ggcucgaagacgaucUg.....    | 1    | 1 | seq |
| ..ggcucgaagacgaucaga.....   | 2212 | 0 | seq |
| ..gUucgaagacgaucaga.....    | 1    | 1 | seq |
| ..ggcCcgaaagacgaucaga.....  | 7    | 1 | seq |
| ..Ngcucgaagacgaucaga.....   | 1    | 1 | seq |
| ..ggGucgaagacgaucaga.....   | 3    | 1 | seq |
| ..ggcucgaagacgaucGga.....   | 8    | 1 | seq |
| ..gAcucgaagacgaucaga.....   | 6    | 1 | seq |
| ..Cgcucgaagacgaucaga.....   | 2    | 1 | seq |
| ..ggcucgaagacgaucagC.....   | 3    | 1 | seq |
| ..ggcucgGagacgaucaga.....   | 9    | 1 | seq |
| ..ggcucgaagacUaucaga.....   | 2    | 1 | seq |
| ..ggcucgaagacgaucUga.....   | 2    | 1 | seq |
| ..ggcucgaagaacgaCcaga.....  | 7    | 1 | seq |
| ..Ugcucgaagacgaucaga.....   | 1    | 1 | seq |
| ..Agcucgaagacgaucaga.....   | 2    | 1 | seq |
| ..ggcucgaagGcgaucaga.....   | 7    | 1 | seq |
| ..ggcucgaagacgGucaga.....   | 6    | 1 | seq |
| ..ggcucgaagacgUucaga.....   | 2    | 1 | seq |
| ..ggcucgaagaacgaucaCa.....  | 2    | 1 | seq |
| ..ggcucgaGgaacgaucaga.....  | 3    | 1 | seq |
| ..ggcucgaagacgaucagU.....   | 13   | 1 | seq |
| ..ggUucgaagacgaucaga.....   | 3    | 1 | seq |
| ..ggcucgaagaacgCucaga.....  | 2    | 1 | seq |
| ..ggcucgaagacgaucagG.....   | 42   | 1 | seq |
| ..ggcuGgaagacgaucaga.....   | 1    | 1 | seq |
| ..ggcAcgaagacgaucaga.....   | 3    | 1 | seq |
| ..ggcGcgaagacgaucaga.....   | 2    | 1 | seq |
| ..ggcucgaaUacgaucaga.....   | 1    | 1 | seq |
| ..ggcucgaagaacgaucCga.....  | 1    | 1 | seq |
| ..ggcucgaUgacgaucaga.....   | 1    | 1 | seq |
| ..ggcucgaagacgauUaga.....   | 2    | 1 | seq |
| ..ggcucgaUgacgaucagau.....  | 1    | 1 | seq |
| ..ggcucgaagacgaucagau.....  | 2185 | 0 | seq |
| ..ggcucgCagacgaucagau.....  | 1    | 1 | seq |
| ..ggcucgaagacgaucagCu.....  | 1    | 1 | seq |
| ..gAcucgaagacgaucagau.....  | 1    | 1 | seq |
| ..ggcAcgaagacgaucagau.....  | 6    | 1 | seq |
| ..ggcucgaGgaacgaucagau..... | 4    | 1 | seq |
| ..ggcucgaagaacgaCcagau..... | 4    | 1 | seq |
| ..ggcucgaagacgaucagaG.....  | 20   | 1 | seq |
| ..ggcucgGagacgaucagau.....  | 8    | 1 | seq |
| ..ggcucgaagacgaucagaA.....  | 7    | 1 | seq |
| ..ggcucgaagGcgaucagau.....  | 2    | 1 | seq |
| ..Agcucgaagacgaucagau.....  | 3    | 1 | seq |
| ..ggcucgaagacgGucagau.....  | 4    | 1 | seq |
| ..ggcucgaagacgaucagGu.....  | 9    | 1 | seq |
| ..Ngcucgaagacgaucagau.....  | 4    | 1 | seq |
| ..ggcucgUagacgaucagau.....  | 1    | 1 | seq |
| ..ggcucgaagUcgaucagau.....  | 1    | 1 | seq |
| ..ggcucgaagacgaucUgau.....  | 1    | 1 | seq |
| ..ggcucgaagaacgaGcagau..... | 1    | 1 | seq |
| ..ggcucgaagacgUucagau.....  | 2    | 1 | seq |
| ..Ugcucgaagacgaucagau.....  | 2    | 1 | seq |
| ..ggcuGgaagacgaucagau.....  | 3    | 1 | seq |
| ..ggcucgaagacgaucGgau.....  | 8    | 1 | seq |
| ..ggcucgaagacUaucagau.....  | 1    | 1 | seq |
| ..ggGucgaagacgaucagau.....  | 1    | 1 | seq |
| ..ggcGcgaagacgaucagau.....  | 2    | 1 | seq |



## Mature

## Star

gggggucugaagacgaucagauaccuagucucaaccauaaaugaugucgaccagcgauugguggauguuucucuaaggacuccggcagcacc

|                                      |      |   |     |
|--------------------------------------|------|---|-----|
| ...ggcucgaagacgCucagau.....          | 1    | 1 | seq |
| ...ggcucgaagacgauUagau.....          | 3    | 1 | seq |
| ...ggcucgaagaAgaucagau.....          | 1    | 1 | seq |
| ...ggcCgaagacgaucagau.....           | 2    | 1 | seq |
| ...ggcucgaagacgaucagaC.....          | 261  | 1 | seq |
| ...Agcucgaagacgaucagaua.....         | 2    | 1 | seq |
| ...ggcucgaagacgGucagaua.....         | 6    | 1 | seq |
| ...ggcucgaagacgaucagauG.....         | 14   | 1 | seq |
| ...ggcucgaagGcgauucagaua.....        | 5    | 1 | seq |
| ...ggcucgaagacgaGcagaua.....         | 1    | 1 | seq |
| ...ggcucgaagaGgaucagaua.....         | 2    | 1 | seq |
| ...gAcucgaagacgaucagaua.....         | 2    | 1 | seq |
| ...ggcucgaagacgaAacagaua.....        | 1    | 1 | seq |
| ...Ugcucgaagacgaucagaua.....         | 2    | 1 | seq |
| ...ggcucgaagacgaucCgaua.....         | 1    | 1 | seq |
| ...ggcucgaagacgauUagaua.....         | 3    | 1 | seq |
| ...ggcuGgaagacgaucagaua.....         | 1    | 1 | seq |
| ...ggcucgaagacgaucagaCa.....         | 12   | 1 | seq |
| ...ggcucgaUgacgaucagaua.....         | 2    | 1 | seq |
| ...ggcucgaagacgaucagaGa.....         | 2    | 1 | seq |
| ...ggcucgaagacgaCagaua.....          | 4    | 1 | seq |
| ...ggcucgaagacgaucagaua.....         | 1727 | 0 | seq |
| ...ggcucgGagacgaucagaua.....         | 4    | 1 | seq |
| ...ggcucgaagacgaucGgaua.....         | 3    | 1 | seq |
| ...ggcucgaagacgaucagGua.....         | 2    | 1 | seq |
| ...Ngcucgaagacgaucagaua.....         | 3    | 1 | seq |
| ...ggcCgaagacgaucagaua.....          | 10   | 1 | seq |
| ...ggcucgaGgaucgaucagaua.....        | 7    | 1 | seq |
| ...ggcucgaagacgaucagauU.....         | 2    | 1 | seq |
| ...gUcucgaagacgaucagaua.....         | 1    | 1 | seq |
| ...gNcucgaagacgaucagaua.....         | 1    | 1 | seq |
| ...ggcucgaagaAgaucagaua.....         | 1    | 1 | seq |
| ...ggcucgaagacgaucagaAa.....         | 1    | 1 | seq |
| ...ggcAcgaagacgaucagaua.....         | 2    | 1 | seq |
| ...ggGucgaagacgaucagaua.....         | 1    | 1 | seq |
| ...ggcucgaagacUaucagaua.....         | 1    | 1 | seq |
| ...ggUucgaagacgaucagaua.....         | 1    | 1 | seq |
| ...ggcucgaaAacgaucagaua.....         | 1    | 1 | seq |
| ...ggcCgaagacgaucagauac.....         | 1    | 1 | seq |
| ...ggcucgaGgacgaucagauac.....        | 2    | 1 | seq |
| ...ggcucgaagacgaucagauac.....        | 196  | 0 | seq |
| ...ggcucgaagUcgaucagauac.....        | 1    | 1 | seq |
| ...ggcucgaagacgaCagauac.....         | 1    | 1 | seq |
| ...ggcucgaUgacgaucagauac.....        | 2    | 1 | seq |
| ...ggcucgaagacgaucagaCac.....        | 1    | 1 | seq |
| ...ggcucgaagacgaucCgauac.....        | 1    | 1 | seq |
| ...Ngcucgaagacgaucagauac.....        | 1    | 1 | seq |
| ...ggcucgaagacgaucagauaU.....        | 6    | 1 | seq |
| ...ggcucgaagacgaucagauaA.....        | 1    | 1 | seq |
| ...ggcucgaagGcgauucagauac.....       | 1    | 1 | seq |
| ...ggcucgaGgacgaucagauacc.....       | 2    | 1 | seq |
| ...ggcCgaagacgaucagauacc.....        | 1    | 1 | seq |
| ...ggcucgaagacgaucagauacG.....       | 1    | 1 | seq |
| ...ggcucgaagacgaucagauacA.....       | 1    | 1 | seq |
| ...ggcucgaagaGgaucagauacc.....       | 1    | 1 | seq |
| ...ggcucgaagacgaucagauacc.....       | 45   | 0 | seq |
| ...ggcucgaagacgaucagauaccC.....      | 2    | 1 | seq |
| ...ggcucgaagacgaucagauacca.....      | 16   | 0 | seq |
| ...ggcucgaagacgaucagauaccU.....      | 3    | 1 | seq |
| ...ggcucgaagacgaucagauaccCucc.....   | 1    | 1 | seq |
| ...ggcucgaagacgaucagauaccuaccu.....  | 1    | 0 | seq |
| ...ggcucgaagacgaucagauaccuaccua..... | 1    | 0 | seq |
| ...Ncucgaagacgaucaga.....            | 2    | 1 | seq |
| ...gcucgaagGcgaucaga.....            | 1    | 1 | seq |
| ...gcucgGagacgaucaga.....            | 1    | 1 | seq |
| ...gcucgaagacgaGcaga.....            | 1    | 1 | seq |
| ...gcucgaagacgaucagG.....            | 5    | 1 | seq |
| ...gcucgaagacgaucaga.....            | 255  | 0 | seq |
| ...Ucucgaagacgaucaga.....            | 1    | 1 | seq |
| ...gcucgaagacgGucaga.....            | 1    | 1 | seq |

## Mature

## Star

gggggcucgaagacgaucagauaccuagucuaaccauaaaugaugucgaccagcgauuggggauguuucucuaaggacuccggcagcacc

|                                     |      |   |     |
|-------------------------------------|------|---|-----|
| ...gcucgaagacgaAacaga.....          | 2    | 1 | seq |
| ...gcucgaagacgaucagU.....           | 1    | 1 | seq |
| ...gcAcgaagacgaucagau.....          | 1    | 1 | seq |
| ...gAucgaagacgaucagau.....          | 1    | 1 | seq |
| ...gcucgaagGcgauacagau.....         | 2    | 1 | seq |
| ...gcucgaagacgaucagau.....          | 356  | 0 | seq |
| ...gcucgaagacgGucagau.....          | 2    | 1 | seq |
| ...gcucgaagacgaucGgau.....          | 1    | 1 | seq |
| ...gcucgGagacgaucagau.....          | 1    | 1 | seq |
| ...gcucgaagacgaGcagau.....          | 1    | 1 | seq |
| ...gcucgaagacgaucUgau.....          | 1    | 1 | seq |
| ...gcucgaagCcgaucagau.....          | 1    | 1 | seq |
| ...gcucgaagacgaucagaA.....          | 2    | 1 | seq |
| ...gcucgaagacgUucagau.....          | 1    | 1 | seq |
| ...gcucgaagacgaucagaC.....          | 59   | 1 | seq |
| ...gcucgaagacgaucagaG.....          | 4    | 1 | seq |
| ...gcucgGagacgaucagaua.....         | 2    | 1 | seq |
| ...gcuaAagacgaucagaua.....          | 1    | 1 | seq |
| ...gcucgaagGcgauacagaua.....        | 4    | 1 | seq |
| ...gcucgUagacgaucagaua.....         | 1    | 1 | seq |
| ...gcucgaagacgaucagGua.....         | 3    | 1 | seq |
| ...Uucgaagacgaucagaua.....          | 2    | 1 | seq |
| ...gcucgaagacgaCcagaua.....         | 1    | 1 | seq |
| ...gcucgaagacgaucagUua.....         | 1    | 1 | seq |
| ...gcucgaagacgaucagauG.....         | 12   | 1 | seq |
| ...gcucgaagacgaucagauU.....         | 3    | 1 | seq |
| ...gcucgaagacgaucGagaua.....        | 1    | 1 | seq |
| ...gcucgaagacgaUagaua.....          | 3    | 1 | seq |
| ...gcucgaGgacgaucagaua.....         | 2    | 1 | seq |
| ...gcucCaagacgaucagaua.....         | 1    | 1 | seq |
| ...gcucgaagacgaucagaua.....         | 1185 | 0 | seq |
| ...gcCcgaagacgaucagaua.....         | 1    | 1 | seq |
| ...gcucgaagacUaucagaua.....         | 1    | 1 | seq |
| ...gcucgaagacgaucGgaua.....         | 1    | 1 | seq |
| ...gcucgaagacgGucagaua.....         | 3    | 1 | seq |
| ...gcucgaagacgaGcagaua.....         | 1    | 1 | seq |
| ...gUucgaagacgaucagaua.....         | 2    | 1 | seq |
| ...gcucgaagacgaucagaCa.....         | 7    | 1 | seq |
| ...Acucgaagacgaucagaua.....         | 3    | 1 | seq |
| ...gcucgaagacgaucUgaua.....         | 1    | 1 | seq |
| ...gcucgaagacgaucagaAa.....         | 1    | 1 | seq |
| ...Uucgaagacgaucagauac.....         | 2    | 1 | seq |
| ...Ncucgaagacgaucagauac.....        | 1    | 1 | seq |
| ...gcucgaGgacgaucagauac.....        | 3    | 1 | seq |
| ...gcucgaagacgaucGgauac.....        | 1    | 1 | seq |
| ...gcucgaagacgaucagauaU.....        | 4    | 1 | seq |
| ...gcucgaagacgaucagauaG.....        | 1    | 1 | seq |
| ...gcucgaagacgaucagauaA.....        | 1    | 1 | seq |
| ...gcucgaagacgaucagGuac.....        | 1    | 1 | seq |
| ...gcucgaagacgaucUgauac.....        | 1    | 1 | seq |
| ...gcucgaagacgaucagauac.....        | 138  | 0 | seq |
| ...gcucgaagacgaucagUuacc.....       | 1    | 1 | seq |
| ...gcucgaagacgaucagauGcc.....       | 3    | 1 | seq |
| ...gcucgaGgacgaucagauacc.....       | 1    | 1 | seq |
| ...gcucgCagacgaucagauacc.....       | 1    | 1 | seq |
| ...Uucgaagacgaucagauacc.....        | 1    | 1 | seq |
| ...gcucgaagacgaucagauacc.....       | 273  | 0 | seq |
| ...gcucgaagacgaucagauacA.....       | 7    | 1 | seq |
| ...gcucgGagacgaucagauacc.....       | 1    | 1 | seq |
| ...gcucgaagacgaUagauacc.....        | 1    | 1 | seq |
| ...gcAcgaagacgaucagauacc.....       | 1    | 1 | seq |
| ...gcucgaagacgaCcagauacc.....       | 1    | 1 | seq |
| ...gcucgaagGcgauacagauacc.....      | 1    | 1 | seq |
| ...gcucgaagacgaucagauaccC.....      | 1    | 1 | seq |
| ...gcucgaagacgaucagauacca.....      | 22   | 0 | seq |
| ...gcucgaagacgaucagauaccU.....      | 4    | 1 | seq |
| ...Acucgaagacgaucagauacca.....      | 1    | 1 | seq |
| ...gcucgaagacgaucagauaccCucc.....   | 1    | 1 | seq |
| ...gcucgaagacgaucagauaccUuccua..... | 1    | 1 | seq |
| ...cucgaGgacgaucagau.....           | 2    | 1 | seq |

## Mature

## Star

gggggcucgaagacgaucagauaccuagucuaaccuauaaugaugucgaccagcgauugguggauguuucucuaaggacuccggcagcacc

|                                |      |   |     |
|--------------------------------|------|---|-----|
| ....cucgaagacgaucagaA.....     | 1    | 1 | seq |
| ....Aucgaagacgaucagau.....     | 1    | 1 | seq |
| ....cucgaagacgGucagau.....     | 1    | 1 | seq |
| ....Uucgaagacgaucagau.....     | 1    | 1 | seq |
| ....cucgGagacgaucagau.....     | 1    | 1 | seq |
| ....cucgaagacgaucagaG.....     | 4    | 1 | seq |
| ....cucgaagacgaucagau.....     | 627  | 0 | seq |
| ....cucgaagacgaucagGu.....     | 2    | 1 | seq |
| ....cuGgaagacgaucagau.....     | 1    | 1 | seq |
| ....cucgaagacgaucGgau.....     | 1    | 1 | seq |
| ....cucgaagacgaucagaC.....     | 87   | 1 | seq |
| ....cucgaagGcgaucagau.....     | 2    | 1 | seq |
| ....Nucgaagacgaucagau.....     | 1    | 1 | seq |
| ....cucgaagacgaGcagaua.....    | 1    | 1 | seq |
| ....cucgaagacgaucCaua.....     | 1    | 1 | seq |
| ....cCgaagacgaucagaua.....     | 7    | 1 | seq |
| ....cucgaagacgaucagUua.....    | 1    | 1 | seq |
| ....Uucgaagacgaucagaua.....    | 2    | 1 | seq |
| ....cAgaagacgaucagaua.....     | 1    | 1 | seq |
| ....cucgaagacgaucagaCa.....    | 11   | 1 | seq |
| ....cucgaGgacgaucagaua.....    | 3    | 1 | seq |
| ....cucgaagacgaucagaua.....    | 1365 | 0 | seq |
| ....cucgaagacgGucagaua.....    | 4    | 1 | seq |
| ....cucgaagacgaucUgaua.....    | 1    | 1 | seq |
| ....cucgaagacgaucagauU.....    | 5    | 1 | seq |
| ....Gucgaagacgaucagaua.....    | 2    | 1 | seq |
| ....cucgaagacgaucagGua.....    | 3    | 1 | seq |
| ....cucgaagacgaCcagaua.....    | 1    | 1 | seq |
| ....cucgaagGcgaucagaua.....    | 5    | 1 | seq |
| ....cucgaagacgaucagauG.....    | 16   | 1 | seq |
| ....cuAgaagacgaucagaua.....    | 1    | 1 | seq |
| ....cucgaaAacgaucagaua.....    | 1    | 1 | seq |
| ....cucgaagacgaucGgaua.....    | 6    | 1 | seq |
| ....cucgaagacgaucagaGa.....    | 2    | 1 | seq |
| ....cucgGagacgaucagaua.....    | 6    | 1 | seq |
| ....cucgaagGcgaucagauac.....   | 1    | 1 | seq |
| ....cucgaagacgaucagauaA.....   | 1    | 1 | seq |
| ....cucgaagacgaucUgauac.....   | 1    | 1 | seq |
| ....cucgaagacgaucagauaU.....   | 9    | 1 | seq |
| ....cucgaagacgaucagauac.....   | 211  | 0 | seq |
| ....Aucgaagacgaucagauac.....   | 1    | 1 | seq |
| ....cucgaagacgaucagGuac.....   | 1    | 1 | seq |
| ....cucgaagacgGucagauac.....   | 1    | 1 | seq |
| ....cucgaagacgaucGgauacc.....  | 3    | 1 | seq |
| ....cucgaagacgaucagauaUc.....  | 2    | 1 | seq |
| ....cucgaGgacgaucagauacc.....  | 1    | 1 | seq |
| ....cucgaagacgaucagaCacc.....  | 1    | 1 | seq |
| ....cCgaagacgaucagauacc.....   | 1    | 1 | seq |
| ....cucgaagacgaucagauacc.....  | 374  | 0 | seq |
| ....cucgaagacgaucagauacA.....  | 8    | 1 | seq |
| ....cucgGagacgaucagauacc.....  | 1    | 1 | seq |
| ....cucgaagacgaucUgauacc.....  | 1    | 1 | seq |
| ....cucCaagacgaucagauacc.....  | 1    | 1 | seq |
| ....Gucgaagacgaucagauacc.....  | 1    | 1 | seq |
| ....cucgaagacgaCcagauacc.....  | 1    | 1 | seq |
| ....cucgaagacgaucagGuacc.....  | 1    | 1 | seq |
| ....cucgaagacgaucagauGcc.....  | 2    | 1 | seq |
| ....cucgaagacgaucagauacca..... | 27   | 0 | seq |
| ....cucgaagacgaucagauaccU..... | 3    | 1 | seq |
| ....cucgaagacgaucGgauacca..... | 1    | 1 | seq |
| ....cucgaagacgaucagauaccC..... | 6    | 1 | seq |
| ....ucgaagacgaucUgaua.....     | 2    | 1 | seq |
| ....ucgaagacgaCcagaua.....     | 4    | 1 | seq |
| ....ucgaagacgaucagauG.....     | 7    | 1 | seq |
| ....ucgaagacgaucGgaua.....     | 1    | 1 | seq |
| ....ucgaagacgaucagGua.....     | 2    | 1 | seq |
| ....ucgaagacgGucagaua.....     | 3    | 1 | seq |
| ....Ncgaagacgaucagaua.....     | 2    | 1 | seq |
| ....ucgCagacgaucagaua.....     | 1    | 1 | seq |
| ....uGgaagacgaucagaua.....     | 1    | 1 | seq |

## Mature

## Star

gggggcucgaagacgaucagauaccuagucuaaccuauaaugaugucgaccagcgauugguggauguuuucucuaaggacuccggcagcacc

|                                 |      |   |     |
|---------------------------------|------|---|-----|
| .....ucgUagacgaucagaua.....     | 1    | 1 | seq |
| .....ucgaGgacgaucagaua.....     | 6    | 1 | seq |
| .....ucgaagacgaucagauC.....     | 1    | 1 | seq |
| .....ucgaagacgaucagaGa.....     | 1    | 1 | seq |
| .....ucgaagacgaucagCua.....     | 1    | 1 | seq |
| .....ucgaagacgaAacagaua.....    | 1    | 1 | seq |
| .....ucgaagGcgaucagaua.....     | 3    | 1 | seq |
| .....ucgGagacgaucagaua.....     | 3    | 1 | seq |
| .....ucgaagacgaucagaCa.....     | 8    | 1 | seq |
| .....ucgaagacgaucagaua.....     | 1583 | 0 | seq |
| .....Ccgaagacgaucagaua.....     | 3    | 1 | seq |
| .....ucgaagacgaucagauU.....     | 3    | 1 | seq |
| .....Acgaagacgaucagaua.....     | 3    | 1 | seq |
| .....Gcgaagacgaucagaua.....     | 3    | 1 | seq |
| .....ucgaagacUaucagaua.....     | 1    | 1 | seq |
| .....ucgaagacgaucagaCac.....    | 1    | 1 | seq |
| .....ucgGagacgaucagauac.....    | 1    | 1 | seq |
| .....ucgaagacgaucagauaG.....    | 1    | 1 | seq |
| .....ucgaagacgGucagauac.....    | 1    | 1 | seq |
| .....ucgaagacgaucagauaU.....    | 7    | 1 | seq |
| .....ucgaagacgaucagauGc.....    | 1    | 1 | seq |
| .....ucgaagacgaucagGuac.....    | 1    | 1 | seq |
| .....ucgaagacgaucagauac.....    | 176  | 0 | seq |
| .....ucgaagacgaucagauacc.....   | 342  | 0 | seq |
| .....Ncgaagacgaucagauacc.....   | 2    | 1 | seq |
| .....ucgGagacgaucagauacc.....   | 2    | 1 | seq |
| .....ucgaagacgaucagGuacc.....   | 1    | 1 | seq |
| .....ucgaGgaacgaucagauacc.....  | 4    | 1 | seq |
| .....ucgaagacgaGcagauacc.....   | 1    | 1 | seq |
| .....ucgaagacgaucagauGcc.....   | 1    | 1 | seq |
| .....ucgaagacgGucagauacc.....   | 3    | 1 | seq |
| .....ucCaagacgaucagauacc.....   | 1    | 1 | seq |
| .....ucgaCgacgaucagauacc.....   | 1    | 1 | seq |
| .....ucgaagacgaucagauacG.....   | 1    | 1 | seq |
| .....ucgaagacgaucagauacA.....   | 10   | 1 | seq |
| .....Ccgaagacgaucagauacc.....   | 1    | 1 | seq |
| .....ucgaagacgaucUgauacc.....   | 1    | 1 | seq |
| .....ucgaagacgaucagagaGacc..... | 1    | 1 | seq |
| .....ucgaagacgaucGgauacc.....   | 5    | 1 | seq |
| .....ucgaagacgaucagauaccC.....  | 3    | 1 | seq |
| .....ucgaagacgaucagauacca.....  | 19   | 0 | seq |
| .....ucgGagacgaucagauacca.....  | 1    | 1 | seq |
| .....ucgaagacgaucagauaccU.....  | 2    | 1 | seq |
| .....ucgaagacgaucagauaccau..... | 1    | 0 | seq |
| .....ucgaagacgaucagauaccaC..... | 1    | 1 | seq |
| .....cgaagGcgaucagauac.....     | 1    | 1 | seq |
| .....cgaagacgaucagauaA.....     | 1    | 1 | seq |
| .....cgaagacgaucCgauac.....     | 1    | 1 | seq |
| .....cgaagacgaucagauac.....     | 194  | 0 | seq |
| .....cgaagacgaCcagauac.....     | 2    | 1 | seq |
| .....cgaagacgaucagauaU.....     | 12   | 1 | seq |
| .....cgaagGcgaucagauacc.....    | 2    | 1 | seq |
| .....Ggaagacgaucagauacc.....    | 1    | 1 | seq |
| .....cgaUgacgaucagauacc.....    | 1    | 1 | seq |
| .....cgaagacgaucGgauacc.....    | 3    | 1 | seq |
| .....cggGagacgaucagauacc.....   | 1    | 1 | seq |
| .....cgaagacgaucagauacc.....    | 589  | 0 | seq |
| .....cgaagacgaucCgauacc.....    | 1    | 1 | seq |
| .....cgaagacgaucagauaUc.....    | 1    | 1 | seq |
| .....Agaagacgaucagauacc.....    | 1    | 1 | seq |
| .....cgaagacgaucagauacA.....    | 22   | 1 | seq |
| .....cgaGgacgaucagauacc.....    | 1    | 1 | seq |
| .....cgaagacgGucagauacc.....    | 2    | 1 | seq |
| .....cgaaAacgaucagauacc.....    | 1    | 1 | seq |
| .....cgaagacgaucagGuacc.....    | 1    | 1 | seq |
| .....Ngaagacgaucagauacc.....    | 1    | 1 | seq |
| .....cgaagacgaucagauacca.....   | 21   | 0 | seq |
| .....Ugaagacgaucagauacca.....   | 1    | 1 | seq |
| .....cgaagacgaucagauacAa.....   | 1    | 1 | seq |
| .....cgaagacgaucagauaccU.....   | 4    | 1 | seq |

## Mature

## Star

gggggcucgaagacgaucagauaccuagucucaaccauaaaugaugucgaccagcgauuggggauguuuucucuaaggacuccggcagcacc

|                                           |     |   |     |
|-------------------------------------------|-----|---|-----|
| .....cgaagacgaucagauaccC.....             | 5   | 1 | seq |
| .....cgaagacgaucagauaccUuccua.....        | 2   | 1 | seq |
| .....gaagacgaucGgauacc.....               | 1   | 1 | seq |
| .....gaagacgaCcgauacc.....                | 1   | 1 | seq |
| .....Uaagacgaucagauacc.....               | 1   | 1 | seq |
| .....gaagGcgauacagauacc.....              | 1   | 1 | seq |
| .....gaagacgaucagaCacc.....               | 1   | 1 | seq |
| .....gaagacgaucagauaUc.....               | 1   | 1 | seq |
| .....gaagacgaucagauaccA.....              | 2   | 1 | seq |
| .....gaagacgaucagauacc.....               | 102 | 0 | seq |
| .....gaagacUaucagauacc.....               | 1   | 1 | seq |
| .....gaagacgaucagauaccC.....              | 1   | 1 | seq |
| .....gaagacgaucagauacca.....              | 3   | 0 | seq |
| .....gaagacgaucagauaccU.....              | 1   | 1 | seq |
| .....gaagacgaucagauaccaGc.....            | 1   | 1 | seq |
| .....gaagacgaucagauaccuagucuc.....        | 1   | 0 | seq |
| .....aagacgaucagauaccU.....               | 3   | 1 | seq |
| .....aagacgaucagauacca.....               | 6   | 0 | seq |
| .....aagacUaucagauacca.....               | 1   | 1 | seq |
| .....aagacgaucagauaccUuc.....             | 1   | 1 | seq |
| .....agacgaucagauaccauA.....              | 1   | 1 | seq |
| .....agacgaucagauaccuagucucaacca.....     | 1   | 0 | seq |
| .....gacgaucagauaccuagucucaacc.....       | 1   | 0 | seq |
| .....cgauacgaucagauaccuagucuaA.....       | 1   | 1 | seq |
| .....gaucagauaccuagucuc.....              | 1   | 0 | seq |
| .....aucagauaccuagucucaacca.....          | 1   | 0 | seq |
| .....cagauaccuagucucaaccaua.....          | 1   | 0 | seq |
| .....agauaccuagucucaaccaua.....           | 1   | 0 | seq |
| .....gauaccuagucucaac.....                | 1   | 0 | seq |
| .....gauaccuagucucaacc.....               | 1   | 0 | seq |
| .....gauaccuagucucaaccaA.....             | 1   | 1 | seq |
| .....gauaccuagucucaaccaC.....             | 1   | 1 | seq |
| .....gauaccuagucucaaccaua.....            | 8   | 0 | seq |
| .....gauaccGuccuagucucaaccauaaaugau.....  | 1   | 1 | seq |
| .....gauaccGuccuagucucaaccauaaaugaug..... | 1   | 1 | seq |
| .....auaccuagucuca.....                   | 1   | 0 | seq |
| .....auaccuagucucaac.....                 | 2   | 0 | seq |
| .....auaccuagucucaacc.....                | 3   | 0 | seq |
| .....auaccuagucucaacca.....               | 3   | 0 | seq |
| .....auaccuagucucaaccaua.....             | 7   | 0 | seq |
| .....auaccuagucucaaccauaaa.....           | 1   | 0 | seq |
| .....uaccuagucucaac.....                  | 1   | 0 | seq |
| .....uaccCuccuagucucaacc.....             | 1   | 1 | seq |
| .....uaccuagucucaacc.....                 | 6   | 0 | seq |
| .....uaccuagucucaacU.....                 | 1   | 1 | seq |
| .....uaccuagucucaacA.....                 | 1   | 1 | seq |
| .....uaccuagucucaacca.....                | 12  | 0 | seq |
| .....uaccuagucucaaccU.....                | 1   | 1 | seq |
| .....uaccCuccuagucucaacca.....            | 1   | 1 | seq |
| .....uaccuagucucaaccau.....               | 1   | 0 | seq |
| .....uaccuagucucaaccau.....               | 1   | 1 | seq |
| .....uaccCuccuagucucaaccaua.....          | 1   | 1 | seq |
| .....uaccuagucucaaccaua.....              | 26  | 0 | seq |
| .....uaccuagucucaaccauaG.....             | 1   | 1 | seq |
| .....uaccCuccuagucucaaccauaa.....         | 1   | 1 | seq |
| .....uaccuagucucaaccauaaa.....            | 3   | 0 | seq |
| .....uaccGuccuagucucaaccauaaauga.....     | 1   | 1 | seq |
| .....accuagucucaacc.....                  | 1   | 0 | seq |
| .....accuagucucaacca.....                 | 3   | 0 | seq |
| .....Gccuagucucaaccaua.....               | 1   | 1 | seq |
| .....accuagucucaaccaua.....               | 7   | 0 | seq |
| .....accuagucucaaccauaa.....              | 1   | 0 | seq |
| .....accCuccuagucucaaccauaa.....          | 1   | 1 | seq |
| .....ccCuccuagucucaacc.....               | 4   | 1 | seq |
| .....ccuagucucaacc.....                   | 3   | 0 | seq |
| .....ccuagucucaacca.....                  | 3   | 0 | seq |
| .....ccuagucucGaccaua.....                | 1   | 1 | seq |
| .....ccCuccuagucucaaccaua.....            | 2   | 1 | seq |
| .....ccuagucucaaccaua.....                | 11  | 0 | seq |
| .....cauccuagucucaacca.....               | 2   | 0 | seq |

## Mature

## Star

gggggucgaagacgaucagauaccuagucucucaaccuauaaugaugucgaccagcgauuggggauguuucucuaaggacuccggcagcacc

|                                          |      |   |     |
|------------------------------------------|------|---|-----|
| .....cCuccuagucucaaccaua.....            | 2    | 1 | seq |
| .....cauccuagucucaaccaua.....            | 2    | 0 | seq |
| .....Nuccuagucucaaccaua.....             | 1    | 1 | seq |
| .....Nuccuagucucaaccauaa.....            | 1    | 1 | seq |
| .....uccuagucucCaccaua.....              | 1    | 1 | seq |
| .....uccuagucucaUccaua.....              | 1    | 1 | seq |
| .....ucUuagucucaaccaua.....              | 2    | 1 | seq |
| .....uGcuagucucaaccaua.....              | 1    | 1 | seq |
| .....uccuaguUucaaccaua.....              | 1    | 1 | seq |
| .....uccuagCcuaccaua.....                | 7    | 1 | seq |
| .....uccuagucucaaccaua.....              | 2509 | 0 | seq |
| .....uccuagAcucaaccaua.....              | 1    | 1 | seq |
| .....Gccuagucucaaccaua.....              | 4    | 1 | seq |
| .....uccuagucucaaccUua.....              | 1    | 1 | seq |
| .....uccuagucucaaccGua.....              | 5    | 1 | seq |
| .....Nccuagucucaaccaua.....              | 3    | 1 | seq |
| .....uccuagucucaaccaGa.....              | 6    | 1 | seq |
| .....uccuagucucaaccaCa.....              | 18   | 1 | seq |
| .....uccCagucucaaccaua.....              | 6    | 1 | seq |
| .....uccuGgucucaaccaua.....              | 2    | 1 | seq |
| .....uccuagucucaaccCua.....              | 1    | 1 | seq |
| .....uUcuagucucaaccaua.....              | 3    | 1 | seq |
| .....uccuagucucUaccaua.....              | 2    | 1 | seq |
| .....uccuagucucaaUcaua.....              | 2    | 1 | seq |
| .....uccuagucCcaaccaua.....              | 6    | 1 | seq |
| .....uccuagucucaacGaua.....              | 1    | 1 | seq |
| .....uccuUgucucaaccaua.....              | 1    | 1 | seq |
| .....uccuagucucaaccaAa.....              | 2    | 1 | seq |
| .....uccuagucAcaaccaua.....              | 3    | 1 | seq |
| .....uccuagucucGaccaua.....              | 5    | 1 | seq |
| .....uccuaAucucaaccaua.....              | 1    | 1 | seq |
| .....uccuagCcucaaccauaa.....             | 2    | 1 | seq |
| .....uccuagucucaaaGcauaa.....            | 1    | 1 | seq |
| .....uccuagucucaaccauaG.....             | 2    | 1 | seq |
| .....uccuagucucaaccauaa.....             | 161  | 0 | seq |
| .....uccCagucucaaccauaa.....             | 1    | 1 | seq |
| .....uccuGgucucaaccauaaa.....            | 1    | 1 | seq |
| .....uccuagucucaaccauaaU.....            | 1    | 1 | seq |
| .....uccuagucucaaccauaaG.....            | 1    | 1 | seq |
| .....uccuagucucaaUcauaaa.....            | 1    | 1 | seq |
| .....uccuagucucaaGcauaaa.....            | 1    | 1 | seq |
| .....uccuagucucaaccauaaa.....            | 76   | 0 | seq |
| .....uccuagucucaaccauaaaau.....          | 3    | 0 | seq |
| .....uccuagucucaaccauaaaaA.....          | 1    | 1 | seq |
| .....uccuagucucaaccauaaaaug.....         | 3    | 0 | seq |
| .....uccuagucucaaccauaaaaugaug.....      | 1    | 0 | seq |
| .....ccuagucucaaccauaa.....              | 2    | 0 | seq |
| .....ccuaguGucaaccauaaa.....             | 1    | 1 | seq |
| .....cuagucucaaccauaaa.....              | 25   | 0 | seq |
| .....cuagucucaaccauaaaaA.....            | 1    | 1 | seq |
| .....cuagucucaaccauaaaaau.....           | 1    | 0 | seq |
| .....cuagucucaaccauaaaaugaugCogacca..... | 1    | 1 | seq |
| .....uagucucaaccauaaaaau.....            | 1    | 0 | seq |
| .....uagucucaaccauaaaGu.....             | 1    | 1 | seq |
| .....agucucaaccauaaaaug.....             | 1    | 0 | seq |
| .....agucucaaccauaaaaugaug.....          | 1    | 0 | seq |
| .....accuaaaaCgaugucgaccagcg.....        | 1    | 1 | seq |
| .....gguggauguuGcucuaaggacu.....         | 2    | 1 | seq |
| .....gguggauguuGcucuaaggacuc.....        | 1    | 1 | seq |
| .....gguggauguuGcucuaaggacucc.....       | 4    | 1 | seq |
| .....guggauguuGcucuaaggacu.....          | 1    | 1 | seq |
| .....guggauguuGcucuaaggacucc.....        | 2    | 1 | seq |
| .....uggauguuGcucuaaggacuc.....          | 1    | 1 | seq |
| .....uggauguuGcucuaaggacucc.....         | 1    | 1 | seq |
| .....ggauguuAcucuaaggacu.....            | 1    | 1 | seq |
| .....ggauguuCcucuaaggacu.....            | 1    | 1 | seq |
| .....ggauguuAcucuaaggacuccg.....         | 2    | 1 | seq |
| .....ggauguuGcucuaaggacuccggc.....       | 1    | 1 | seq |
| .....gauguuAcucuaaggacu.....             | 1    | 1 | seq |
| .....gauguuAcucuaaggacucc.....           | 1    | 1 | seq |

## Mature

## Star

gggggucgacgaagacgaucagauaccuagucucaaccauaaaugaugucgaccagcgauuggggauguuucucuaaggacuccggcagcacc

|                                    |    |   |     |
|------------------------------------|----|---|-----|
| .....gauguuAcucuaaggacuccg.....    | 1  | 1 | seq |
| .....gauguuGcucuaaggacuccgg.....   | 1  | 1 | seq |
| .....gauguuGcucuaaggacuccggca....  | 2  | 1 | seq |
| .....gauguuGcucuaaggacuccggcagca.. | 1  | 1 | seq |
| .....auguuucucuaaggacu.....        | 3  | 0 | seq |
| .....auguuAcucuaaggacu.....        | 1  | 1 | seq |
| .....auguuucucuaaggacuccg.....     | 2  | 0 | seq |
| .....uguuAcucuaaggacucc.....       | 2  | 1 | seq |
| .....uguuCcucuaaggacucc.....       | 1  | 1 | seq |
| .....uguuAcucuaaggacuccg.....      | 4  | 1 | seq |
| .....uguuucucuaaggacuccg.....      | 2  | 0 | seq |
| .....uguuGcucuaaggacuccgg.....     | 4  | 1 | seq |
| .....uguuGcucuaaggacuccggc.....    | 3  | 1 | seq |
| .....uguuGcucuaaggacuccggca....    | 2  | 1 | seq |
| .....uguuGcucuaaggacuccggcagcac..  | 1  | 1 | seq |
| .....guuucucuaaggacuccg.....       | 1  | 0 | seq |
| .....guuGcucuaaggacuccgg.....      | 3  | 1 | seq |
| .....guuGcucuaaggacuccggc.....     | 3  | 1 | seq |
| .....guuGcucuaaggacuccggca....     | 2  | 1 | seq |
| .....uuAcucuaaggacuccg.....        | 4  | 1 | seq |
| .....uuucucuaaggacuccC.....        | 1  | 1 | seq |
| .....uuCcucuaaggacuccg.....        | 1  | 1 | seq |
| .....uuucucuaaggacuccg.....        | 3  | 0 | seq |
| .....uuGcucuaaggacuccgg.....       | 8  | 1 | seq |
| .....uuGcucuaaggacuccggc.....      | 2  | 1 | seq |
| .....uuGcucuaaggacuccggca....      | 2  | 1 | seq |
| .....uuGcucuaaggacuccggcag....     | 1  | 1 | seq |
| .....uuGcucuaaggacuccggcagc....    | 1  | 1 | seq |
| .....uuGcucuaaggacuccggcagca..     | 2  | 1 | seq |
| .....uuGcucuaaggacuccggcagcac..    | 1  | 1 | seq |
| .....uGcucuaaggacuccgg.....        | 14 | 1 | seq |
| .....uGcucuaaggacuccggc.....       | 3  | 1 | seq |
| .....uGcucuaaggacuccggca....       | 5  | 1 | seq |
| .....Gcucuaaggacuccggc.....        | 10 | 1 | seq |
| .....Gcucuaaggacuccggca....        | 3  | 1 | seq |
| .....Gcucuaaggacuccggcagc....      | 1  | 1 | seq |
| .....cucuaaggacuccgUca....         | 5  | 1 | seq |
| .....cCuaaggacuccggca....          | 1  | 1 | seq |
| .....cucuaaggacuccgAca....         | 6  | 1 | seq |
| .....cucuaaggacuccggca....         | 3  | 0 | seq |
| .....cucuaaggacuccgAacg....        | 1  | 1 | seq |
| .....cucuaaggacuccgUcag....        | 14 | 1 | seq |
| .....cucuaaggacuccggcag....        | 2  | 0 | seq |
| .....cucuaaggacuccggcagc....       | 1  | 0 | seq |
| .....cucuaaggacuccggcagca..        | 1  | 0 | seq |
| .....cucuaaggacuccgAcagca..        | 1  | 1 | seq |
| .....cucuaaggacuccgUcagca..        | 1  | 1 | seq |
| .....cucuaaggacuccgUcagcacc        | 1  | 1 | seq |
| .....cucuaaggacuccggcagcacc        | 2  | 0 | seq |
| .....cucuaaggacuccgAacgcaacc       | 2  | 1 | seq |
| .....ucuaaggacuccgUcag....         | 1  | 1 | seq |
| .....ucuaaggacuccgAcagca..         | 1  | 1 | seq |
| .....ucuaaggacuccgUcagcaacc        | 3  | 1 | seq |
| .....cuaaggacuccgUcagc....         | 3  | 1 | seq |
| .....cuaaggacuccgUcagca..          | 1  | 1 | seq |
| .....cuaaggacuccgAcagca..          | 2  | 1 | seq |
| .....cuaaggacuccggcagca..          | 1  | 0 | seq |
| .....cuaaggacuccggcagcaU..         | 1  | 1 | seq |
| .....cuaaggacuccgAcagcacc          | 1  | 1 | seq |
| .....cuaaggacuccggcagcacc          | 1  | 0 | seq |
| .....cuaaggacuccgUcagcacc          | 4  | 1 | seq |
| .....uaaggacuccgUcagca..           | 2  | 1 | seq |
| .....uaaggacuccggcagcacc           | 1  | 0 | seq |
| .....uaaggacuccgUcagcacc           | 1  | 1 | seq |
| .....aaggacuccgAcagcacc            | 1  | 1 | seq |
| .....aaggacuccgUcagcacc            | 4  | 1 | seq |
| .....aaggacuccggcaCcacc            | 1  | 1 | seq |
| .....aggacuccgUcagcacc             | 7  | 1 | seq |
| .....aggacuccgAcagcacc             | 1  | 1 | seq |
| .....aggacuccggcagcacc             | 2  | 0 | seq |

**Mature**

**Star**

gggggcucgaagacgaucagauaccuagucuaaccuauaaugaugucgaccagcgauuggggauguuuucucuaaggacuccgggcagcacc



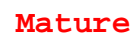

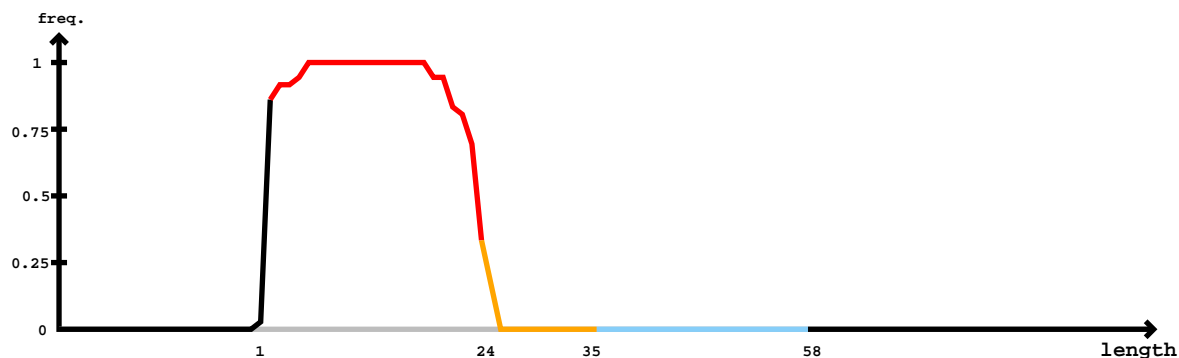

Star

[illegible]

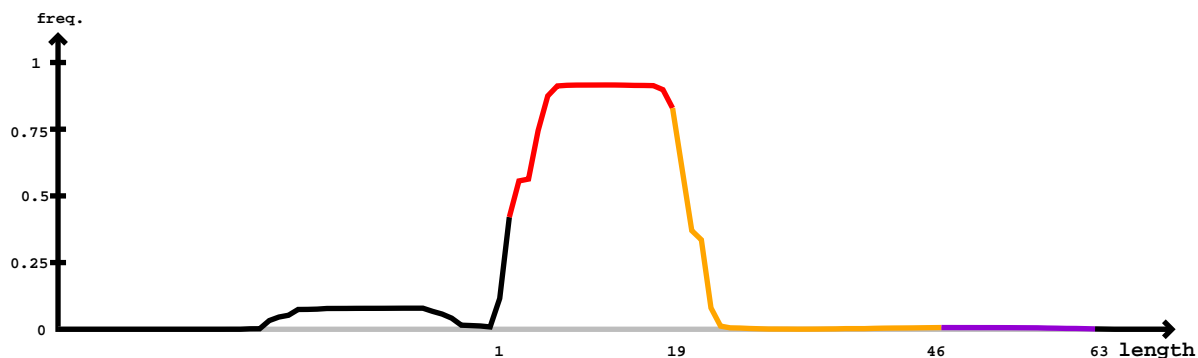

Star

| 5' | aggggggcgugauucuuugcgugugcgaucauaccagcgguuaauguac                                                          | cgggaucccaucagaaacuc | cgguaguu | aagcacgcgcuugcgcuagag | uaguuuggggaugggugaucccc | reads | mm | sample |
|----|------------------------------------------------------------------------------------------------------------|----------------------|----------|-----------------------|-------------------------|-------|----|--------|
|    | aggggggcgugauucuuugcgugugcgaucauaccagcgguuaauguac                                                          | cgggaucccaucagaaacuc | cgguaguu | aagcacgcgcuugcgcuagag | uaguuuggggaugggugaucccc | 1     | 1  | seq    |
|    | aggggggcgugauucuuugcgugugcgaucauaccagcgguuaauguac                                                          | cgggaucccaucagaaacuc | cgguaguu | aagcacgcgcuugcgcuagag | uaguuuggggaugggugaucccc | 1     | 0  | seq    |
|    | (((((((.((((.(.(.(.((((((...)))))))))).))))...((((.(.((((((...(((((((((((((((...)))))).)))))).))))).)))))) |                      |          |                       |                         | 1     | 0  | seq    |
|    | gAgugugcgaucauaccagcgguu                                                                                   |                      |          |                       |                         | 1     | 0  | seq    |
|    | cgugugcgaucauaccag                                                                                         |                      |          |                       |                         | 1     | 0  | seq    |
|    | gugugcgaucauaccag                                                                                          |                      |          |                       |                         | 1     | 0  | seq    |
|    | gugugcgaucauaccagc                                                                                         |                      |          |                       |                         | 1     | 0  | seq    |
|    | gugugcgaucauaccagcg                                                                                        |                      |          |                       |                         | 5     | 0  | seq    |
|    | gugugcgaucauaccagcgcu                                                                                      |                      |          |                       |                         | 1     | 0  | seq    |
|    | gugugcgaucauaccagcgC                                                                                       |                      |          |                       |                         | 1     | 1  | seq    |
|    | gugugcgaucauaccagcguu                                                                                      |                      |          |                       |                         | 2     | 0  | seq    |
|    | gugugcgaucauaccagcgguu                                                                                     |                      |          |                       |                         | 3     | 0  | seq    |
|    | gugugcgaucauaccagcgguuaug                                                                                  |                      |          |                       |                         | 1     | 0  | seq    |
|    | gGgugcgaucauaccagcgguuaaugu                                                                                |                      |          |                       |                         | 3     | 1  | seq    |
|    | gGgugcgaucauaccagcgguuaauguaccggau                                                                         |                      |          |                       |                         | 1     | 1  | seq    |
|    | gGgugcgaucauaccagcgguuaauguaccggaucc                                                                       |                      |          |                       |                         | 2     | 1  | seq    |
|    | gugugcgaucauaccagcgguuaaugCaccggaucccauc                                                                   |                      |          |                       |                         | 2     | 1  | seq    |
|    | gGgugcgaucauaccagcgguuaauguaccggaucccauc                                                                   |                      |          |                       |                         | 5     | 1  | seq    |
|    | gGgugcgaucauaccagcgguuaauguaccggaucccaucagaacu                                                             |                      |          |                       |                         | 1     | 1  | seq    |
|    | gugugcgaucauaccagcgguuaaugCaccggaucccaucagaacuc                                                            |                      |          |                       |                         | 1     | 1  | seq    |
|    | gGgugcgaucauaccagcgguuaauguaccggaucccaucagaacuc                                                            |                      |          |                       |                         | 1     | 1  | seq    |
|    | Ngugcgaucauaccagcg                                                                                         |                      |          |                       |                         | 1     | 1  | seq    |
|    | ugugcgaucauaccagcgguu                                                                                      |                      |          |                       |                         | 2     | 0  | seq    |
|    | ugugcgaucauaccagcgguuaugCaccggaucccauc                                                                     |                      |          |                       |                         | 1     | 1  | seq    |
|    | gugcggGucauaccagcg                                                                                         |                      |          |                       |                         | 2     | 1  | seq    |
|    | gugcgaucauaccagcg                                                                                          |                      |          |                       |                         | 227   | 0  | seq    |
|    | Ngugcgaucauaccagcg                                                                                         |                      |          |                       |                         | 1     | 1  | seq    |
|    | guUcgaucauaccagcg                                                                                          |                      |          |                       |                         | 1     | 1  | seq    |
|    | gugcgaucauaccagGg                                                                                          |                      |          |                       |                         | 1     | 1  | seq    |
|    | gugcgaucauaccagcgcu                                                                                        |                      |          |                       |                         | 125   | 0  | seq    |
|    | Ngugcgaucauaccagcgcu                                                                                       |                      |          |                       |                         | 1     | 1  | seq    |
|    | gugcgaucauaccagcgG                                                                                         |                      |          |                       |                         | 4     | 1  | seq    |
|    | gugcggGucauaccagcgguu                                                                                      |                      |          |                       |                         | 2     | 1  | seq    |
|    | gugcgaucauaccagcgguu                                                                                       |                      |          |                       |                         | 131   | 0  | seq    |
|    | gugcgaucauaccUgcgguu                                                                                       |                      |          |                       |                         | 1     | 1  | seq    |
|    | gugcgaucauaccagcgguG                                                                                       |                      |          |                       |                         | 4     | 1  | seq    |

Star

|                                                                                                 |     |   |     |
|-------------------------------------------------------------------------------------------------|-----|---|-----|
| .gGgcgauc <u>au</u> accagcg <u>uu</u> .....                                                     | 1   | 1 | seq |
| .gCgcgauc <u>au</u> accagcg <u>uu</u> a.....                                                    | 1   | 1 | seq |
| .gugcgauc <u>Cu</u> accagcg <u>uu</u> a.....                                                    | 1   | 1 | seq |
| .gugcgauc <u>au</u> accagcg <u>uu</u> U.....                                                    | 1   | 1 | seq |
| .gugcgauc <u>au</u> accagcg <u>uu</u> a.....                                                    | 80  | 0 | seq |
| .Nugcgauc <u>au</u> accagcg <u>uu</u> aa.....                                                   | 1   | 1 | seq |
| .gugcgauc <u>au</u> accagcg <u>uu</u> aa.....                                                   | 8   | 0 | seq |
| .gugcgauc <u>au</u> accagcg <u>uu</u> aa <u>u</u> .....                                         | 6   | 0 | seq |
| .gugcgauc <u>au</u> accagcg <u>uu</u> aa <u>u</u> g.....                                        | 8   | 0 | seq |
| .gugcgauc <u>au</u> accagcg <u>uu</u> aa <u>u</u> g <u>u</u> .....                              | 4   | 0 | seq |
| .ugcgauc <u>au</u> accagcgG.....                                                                | 1   | 1 | seq |
| .ugcgauc <u>au</u> accagcg <u>u</u> .....                                                       | 78  | 0 | seq |
| .ugcgauc <u>au</u> accagG <u>gu</u> u.....                                                      | 1   | 1 | seq |
| .Cgcgauc <u>au</u> accagcg <u>uu</u> .....                                                      | 2   | 1 | seq |
| .ugcGGu <u>au</u> accagcg <u>uu</u> .....                                                       | 1   | 1 | seq |
| .ugcgauc <u>au</u> accagcg <u>uu</u> .....                                                      | 101 | 0 | seq |
| .Agcgauc <u>au</u> accagcg <u>uu</u> .....                                                      | 1   | 1 | seq |
| .ugcgauc <u>au</u> accagcgG.....                                                                | 5   | 1 | seq |
| .ugcgauc <u>au</u> accagcg <u>uu</u> a.....                                                     | 38  | 0 | seq |
| .ugcGGu <u>au</u> accagcg <u>uu</u> a.....                                                      | 1   | 1 | seq |
| .ugcgauc <u>au</u> accagcg <u>uu</u> aa.....                                                    | 5   | 0 | seq |
| .ugcgauc <u>au</u> accagcg <u>uu</u> aa <u>u</u> .....                                          | 5   | 0 | seq |
| .ugcgauc <u>au</u> accagcg <u>uu</u> aa <u>u</u> g.....                                         | 21  | 0 | seq |
| .ugcgauc <u>au</u> accagcg <u>uu</u> aa <u>u</u> g <u>u</u> acc.....                            | 1   | 0 | seq |
| .gcgauc <u>au</u> accagcgG <u>u</u> .....                                                       | 1   | 1 | seq |
| .gcgauc <u>au</u> accagcg <u>uu</u> .....                                                       | 54  | 0 | seq |
| .gcgauc <u>au</u> accagcg <u>uu</u> a.....                                                      | 63  | 0 | seq |
| .gcgGu <u>au</u> accagcg <u>uu</u> a.....                                                       | 1   | 1 | seq |
| .Ucgau <u>au</u> accagcg <u>uu</u> aa.....                                                      | 1   | 1 | seq |
| .gcgauc <u>au</u> accagcg <u>uu</u> aa.....                                                     | 7   | 0 | seq |
| .gcgauc <u>au</u> accagcg <u>uu</u> aa <u>u</u> .....                                           | 2   | 0 | seq |
| .gcgauc <u>au</u> accagcg <u>uu</u> aa <u>u</u> g.....                                          | 3   | 0 | seq |
| .gcU <u>au</u> accagcg <u>uu</u> aa <u>u</u> g.....                                             | 1   | 1 | seq |
| .gcgauc <u>au</u> accagcg <u>uu</u> aa <u>u</u> gCaccggaucc <u>ca</u> cagaacuc <u>cg</u> u..... | 1   | 1 | seq |
| .cgau <u>au</u> accagcg <u>uu</u> C.....                                                        | 2   | 1 | seq |
| .cgGu <u>au</u> accagcg <u>uu</u> a.....                                                        | 2   | 1 | seq |
| .cgau <u>au</u> accagcg <u>uu</u> a.....                                                        | 337 | 0 | seq |
| .cgU <u>au</u> accagcg <u>uu</u> a.....                                                         | 1   | 1 | seq |
| .cgau <u>au</u> accagcg <u>uu</u> U.....                                                        | 5   | 1 | seq |
| .cgau <u>au</u> accUgcg <u>uu</u> a.....                                                        | 2   | 1 | seq |
| .cgau <u>au</u> accagcg <u>uu</u> aa.....                                                       | 35  | 0 | seq |
| .cgau <u>au</u> accagcg <u>uu</u> aa <u>u</u> .....                                             | 23  | 0 | seq |
| .cgau <u>au</u> accagcg <u>uu</u> aa <u>u</u> g.....                                            | 21  | 0 | seq |
| .cgau <u>au</u> accagcg <u>uu</u> aa <u>u</u> g <u>u</u> .....                                  | 2   | 0 | seq |
| .cgau <u>au</u> accagcg <u>uu</u> aa <u>u</u> g <u>u</u> accgga.....                            | 1   | 0 | seq |
| .cgau <u>au</u> accagcg <u>uu</u> aa <u>u</u> gCaccggaucc <u>ca</u> cagaacuc <u>cg</u> u.....   | 1   | 1 | seq |
| .gau <u>au</u> accagcg <u>uu</u> U.....                                                         | 1   | 1 | seq |
| .gau <u>au</u> accagcg <u>uu</u> aa.....                                                        | 2   | 0 | seq |
| .gau <u>au</u> accagcg <u>uu</u> aa <u>u</u> .....                                              | 1   | 0 | seq |
| .gau <u>au</u> accagcg <u>uu</u> aa <u>u</u> g.....                                             | 2   | 0 | seq |
| .au <u>au</u> accagcg <u>uu</u> aa <u>u</u> .....                                               | 9   | 0 | seq |
| .au <u>au</u> accagcg <u>uu</u> aa <u>u</u> g.....                                              | 9   | 0 | seq |
| .au <u>au</u> accagcg <u>uu</u> aa <u>u</u> g <u>u</u> accggaucc <u>ca</u> u.....               | 1   | 0 | seq |
| .u <u>au</u> accagcg <u>uu</u> aa <u>u</u> g.....                                               | 42  | 0 | seq |
| .u <u>au</u> accagcg <u>uu</u> aa <u>u</u> g <u>u</u> .....                                     | 1   | 0 | seq |
| .ucGuaccagcg <u>uu</u> aa <u>u</u> g <u>u</u> accggaucc <u>cc</u> .....                         | 1   | 1 | seq |
| .A <u>ca</u> uaccagcg <u>uu</u> aa <u>u</u> g <u>u</u> accggaucc <u>cc</u> .....                | 1   | 1 | seq |
| .u <u>ca</u> uaccagcg <u>uu</u> aa <u>u</u> g <u>u</u> accggaucc <u>ca</u> u.....               | 1   | 0 | seq |
| .u <u>ca</u> uaccagcg <u>uu</u> aa <u>u</u> g <u>u</u> accggaucc <u>ca</u> cagaac.....          | 1   | 0 | seq |
| . <u>ca</u> uaccagcg <u>uu</u> aa <u>u</u> g <u>u</u> .....                                     | 1   | 0 | seq |
| . <u>ca</u> uaccagcg <u>uu</u> aa <u>u</u> g <u>u</u> accgg.....                                | 1   | 0 | seq |
| .auaccagcg <u>uu</u> aa <u>u</u> g <u>u</u> accggaucc <u>ca</u> u.....                          | 1   | 0 | seq |
| .auaccagcg <u>uu</u> aa <u>u</u> gAaccggaucc <u>ca</u> u <u>ca</u> .....                        | 1   | 1 | seq |
| .uaccagcg <u>uu</u> aa <u>u</u> g <u>u</u> accggaucc <u>ca</u> u.....                           | 1   | 0 | seq |
| .uaccagcg <u>uu</u> aa <u>u</u> g <u>u</u> accggaucc <u>ca</u> u <u>ca</u> .....                | 2   | 0 | seq |
| .uaccagcg <u>uu</u> aa <u>u</u> g <u>u</u> accggaucc <u>ca</u> caga <u>aa</u> .....             | 1   | 0 | seq |
| .uaccagcg <u>uu</u> aa <u>u</u> g <u>u</u> accggaucc <u>ca</u> cagaac <u>u</u> .....            | 2   | 0 | seq |
| .accagcg <u>uu</u> aa <u>u</u> g <u>u</u> acc.....                                              | 1   | 0 | seq |
| .accagcg <u>uu</u> aa <u>u</u> g <u>u</u> accggaucc <u>ca</u> cagaacuc.....                     | 1   | 0 | seq |
| .accagcg <u>uu</u> aa <u>u</u> g <u>u</u> accggaucc <u>ca</u> cagaacuc <u>cg</u> u.....         | 1   | 1 | seq |

## Mature

Star

[illegible]

## Mature

## Star

agggggcgugauucuuugcgugcgaucauaccagcguaaaguaacgggaucuccaucagaaacuccgguaguuagcacgcguugugcuagaguuaguuuggggaugggugaucuccc

|                                             |      |   |     |
|---------------------------------------------|------|---|-----|
| .....uaccggaucuccaucagaaacuccgCagu.....     | 1    | 1 | seq |
| .....uaccggaucuccaucagaaacuccgCaguuaag..... | 1    | 1 | seq |
| .....accggaucuccUucagaa.....                | 1    | 1 | seq |
| .....accggaucuccaucagUa.....                | 1    | 1 | seq |
| .....Cccggaucuccaucagaa.....                | 2    | 1 | seq |
| .....accggGuuccaucagaa.....                 | 3    | 1 | seq |
| .....accggaucuccaucagau.....                | 1    | 1 | seq |
| .....accggaCcccaucagaa.....                 | 1    | 1 | seq |
| .....accggaucuccaucagaa.....                | 285  | 0 | seq |
| .....accggaucuccaucagaaA.....               | 1    | 1 | seq |
| .....accggaucuccaucagaaC.....               | 385  | 0 | seq |
| .....accggaCcccaucagaaC.....                | 1    | 1 | seq |
| .....accggGuuccaucagaaacu.....              | 2    | 1 | seq |
| .....Cccggaucuccaucagaaacu.....             | 1    | 1 | seq |
| .....accggGuuccaucagaaacu.....              | 1    | 1 | seq |
| .....accggaCcccaucagaaacu.....              | 1    | 1 | seq |
| .....accggaucuccaucagaaC.....               | 126  | 1 | seq |
| .....accggaucuccaucagaaacu.....             | 733  | 0 | seq |
| .....Uccggaucuccaucagaaacuc.....            | 1    | 1 | seq |
| .....Cccggaucuccaucagaaacuc.....            | 2    | 1 | seq |
| .....accggaucuccaucagaaAuc.....             | 1    | 1 | seq |
| .....accggUucccaucagaaacuc.....             | 1    | 1 | seq |
| .....accggaucuccUucagaaacuc.....            | 1    | 1 | seq |
| .....accggaCcccaucagaaacuc.....             | 1    | 1 | seq |
| .....accggaucAcaucagaaacuc.....             | 2    | 1 | seq |
| .....accggaucuccaucagaaacuc.....            | 528  | 0 | seq |
| .....accggaucuccaucagaaCcc.....             | 7    | 1 | seq |
| .....Nccggaucuccaucagaaacuc.....            | 1    | 1 | seq |
| .....accggaucuccaucagaaacucc.....           | 28   | 0 | seq |
| .....accggaucuccaucagaaacuccg.....          | 9    | 0 | seq |
| .....accggaucuccaucagaaCccg.....            | 1    | 1 | seq |
| .....accggauAccaucagaaacuccgu.....          | 1    | 1 | seq |
| .....accggaucuccaucagaaacuccgA.....         | 1    | 1 | seq |
| .....accggaucuccaucagaaacuccgu.....         | 3    | 0 | seq |
| .....accggaucuccaucagaGcuccgu.....          | 1    | 1 | seq |
| .....ccggaucuccAcaagaaC.....                | 1    | 1 | seq |
| .....ccggaucuccaucagaaA.....                | 4    | 1 | seq |
| .....ccggaucAcaucagaaC.....                 | 1    | 1 | seq |
| .....ccggaucGaucagaaC.....                  | 1    | 1 | seq |
| .....ccggGuucccaucagaaC.....                | 5    | 1 | seq |
| .....ccggaucuccaGcagaaC.....                | 1    | 1 | seq |
| .....ccggaCcccaucagaaC.....                 | 1    | 1 | seq |
| .....ccggaucucccaucagaaC.....               | 958  | 0 | seq |
| .....ccggaucucccaucagaaacu.....             | 2743 | 0 | seq |
| .....ccggGuucccaucagaaacu.....              | 6    | 1 | seq |
| .....ccggaucuccaGcagaaacu.....              | 2    | 1 | seq |
| .....ccggaucuccaucCgaacu.....               | 1    | 1 | seq |
| .....ccggCuucccaucagaaacu.....              | 1    | 1 | seq |
| .....ccggaugCccaucagaaacu.....              | 1    | 1 | seq |
| .....ccggaucucccaucagaaC.....               | 442  | 1 | seq |
| .....ccggaucuccUucagaaacu.....              | 1    | 1 | seq |
| .....ccggaucuccaucagUacu.....               | 1    | 1 | seq |
| .....Ncggaucucccaucagaaacu.....             | 4    | 1 | seq |
| .....ccUgaucucccaucagaaacu.....             | 2    | 1 | seq |
| .....ccggaCcccaucagaaacu.....               | 5    | 1 | seq |
| .....ccggaucGaucagaaacu.....                | 2    | 1 | seq |
| .....ccCgaucucccaucagaaacu.....             | 1    | 1 | seq |
| .....ccggUucccaucagaaacuc.....              | 1    | 1 | seq |
| .....ccggaucucccaucagaaacuc.....            | 1678 | 0 | seq |
| .....Ncggaucucccaucagaaacuc.....            | 2    | 1 | seq |
| .....ccggaucucccaucagaUcuc.....             | 1    | 1 | seq |
| .....ccggaucuccaucCgaacuc.....              | 1    | 1 | seq |
| .....ccggaGcccaucagaaacuc.....              | 1    | 1 | seq |
| .....ccggaucucccaucagaaacuG.....            | 1    | 1 | seq |
| .....ccggaucucccaucagUacuc.....             | 2    | 1 | seq |
| .....ccggaCcccaucagaaacuc.....              | 5    | 1 | seq |
| .....ccggGuucccaucagaaacuc.....             | 7    | 1 | seq |
| .....ccggaucGaucagaaacuc.....               | 1    | 1 | seq |
| .....ccggaucucccaucagaaCcc.....             | 17   | 1 | seq |
| .....ccggaucGcaucagaaacucc.....             | 1    | 1 | seq |

## Mature

## Star

agggggcgugauucuuugcgugugcgaucauaccagcguaaauaguaacgggaucuccaucagaacucgguaaguuagcagcguugugcuagaguuaguuaggggauggggugaucuccc

|                                      |      |   |     |
|--------------------------------------|------|---|-----|
| .....ccggaucuccaucagaacCcc.....      | 1    | 1 | seq |
| .....ccggaucuccaucagaacucc.....      | 59   | 0 | seq |
| .....ccggaucuccaucagaacuccU.....     | 2    | 1 | seq |
| .....ccggaucuccaucagaacuccG.....     | 32   | 0 | seq |
| .....ccggaucuccaucagaacucccG.....    | 1    | 1 | seq |
| .....ccUgaucuccaucagaacucccgu.....   | 1    | 1 | seq |
| .....ccggaucuccaucagaacuccCu.....    | 1    | 1 | seq |
| .....ccggaucuccaucagaacucccG.....    | 3    | 1 | seq |
| .....ccggaucuccaucagaacucccgu.....   | 49   | 0 | seq |
| .....ccggGucccaucagaacucccgu.....    | 1    | 1 | seq |
| .....ccggaucuccaucagaacucccgu.....   | 4    | 0 | seq |
| .....cggaucccaucagaacC.....          | 224  | 1 | seq |
| .....cggacCcccaucagaacu.....         | 4    | 1 | seq |
| .....cggaucccccucagaacu.....         | 1    | 1 | seq |
| .....cggGucccaucagaacu.....          | 7    | 1 | seq |
| .....Nggaucuccaucagaacu.....         | 2    | 1 | seq |
| .....cggaucccaucagaacu.....          | 1460 | 0 | seq |
| .....cggaucccaucagaacuc.....         | 875  | 0 | seq |
| .....cggacCcccaucagaacuc.....        | 3    | 1 | seq |
| .....cggaucccaucagaUcuc.....         | 1    | 1 | seq |
| .....cggaucccccUucagaacuc.....       | 1    | 1 | seq |
| .....cggaucccaucagaacuc.....         | 1    | 1 | seq |
| .....cggaucccaucagaacCc.....         | 12   | 1 | seq |
| .....cggGucccaucagaacuc.....         | 4    | 1 | seq |
| .....cggaucccaucagCacuc.....         | 1    | 1 | seq |
| .....cggaucccaucagaacucc.....        | 27   | 0 | seq |
| .....cggaucccaucagaacuccC.....       | 1    | 1 | seq |
| .....cggaucccccUucagaacuccG.....     | 1    | 1 | seq |
| .....cggaucccaucagaacuccG.....       | 27   | 0 | seq |
| .....cggaucccaucagaacuccU.....       | 1    | 1 | seq |
| .....cggaucccaucagaacucccG.....      | 5    | 1 | seq |
| .....Gggaucccaucagaacucccgu.....     | 1    | 1 | seq |
| .....cggaucccaucagaacuccCu.....      | 1    | 1 | seq |
| .....cggacCcccaucagaacucccgu.....    | 1    | 1 | seq |
| .....cggaucccaucaAaacucccgu.....     | 1    | 1 | seq |
| .....cggaucccaucagaacucccgu.....     | 25   | 0 | seq |
| .....cggaucccaucagaacucccGua.....    | 1    | 1 | seq |
| .....cggaucccaucagaacucccGua.....    | 1    | 1 | seq |
| .....ggaucccaucagaacuc.....          | 132  | 0 | seq |
| .....ggaucccaucagaacCc.....          | 2    | 1 | seq |
| .....ggaCcccaucagaacuc.....          | 1    | 1 | seq |
| .....ggaucccaucagaacucc.....         | 3    | 0 | seq |
| .....ggaucccaucagaacuccG.....        | 1    | 0 | seq |
| .....ggCucccaucagaacuccG.....        | 1    | 1 | seq |
| .....ggaucccaucagaacucccgu.....      | 3    | 0 | seq |
| .....Ugauccccaucagaacucccguaguu..... | 1    | 1 | seq |
| .....gaucccaucagaacCcc.....          | 2    | 1 | seq |
| .....gaCcccaucagaacucc.....          | 2    | 1 | seq |
| .....gaucccaucagaacucc.....          | 561  | 0 | seq |
| .....gaucccaAacagaacucc.....         | 1    | 1 | seq |
| .....gaCcccaucagaacuccG.....         | 7    | 1 | seq |
| .....gaucccaucagaUcuccG.....         | 1    | 1 | seq |
| .....gaucccaucagaacCccG.....         | 7    | 1 | seq |
| .....gaucccaucagaacGuccG.....        | 1    | 1 | seq |
| .....gaucccaucagaacuccG.....         | 2549 | 0 | seq |
| .....gaucccaucaCaacuccG.....         | 1    | 1 | seq |
| .....gaucccccucagaacuccG.....        | 1    | 1 | seq |
| .....gaucccaucagCacuccG.....         | 1    | 1 | seq |
| .....NaucucccaucagaacuccG.....       | 4    | 1 | seq |
| .....gaucccaucagaacucccgu.....       | 342  | 0 | seq |
| .....gaucccaucagaacuccGgu.....       | 1    | 1 | seq |
| .....gaucccaucagaacucccG.....        | 71   | 1 | seq |
| .....gaucccaucagaacucccG.....        | 15   | 1 | seq |
| .....gaucccaucagGacucccgu.....       | 1    | 1 | seq |
| .....gauccUaucagaacucccgu.....       | 1    | 1 | seq |
| .....gaCcccaucagaacucccgu.....       | 1    | 1 | seq |
| .....gaucccaucagaGucccgu.....        | 1    | 1 | seq |
| .....gaucccaucagaacGuccgu.....       | 1    | 1 | seq |

## Mature

## Star

agggggcgugauucugcgugcgaucauaccagcguaaauaguaacgggaucuccaucagaacucgguaaguuagcacgcguugugcuagaguuaguuuggggaugggugaucuccc

|                                      |      |   |     |
|--------------------------------------|------|---|-----|
| .....gaucuccaucagaacuccgGa.....      | 4    | 1 | seq |
| .....gaucuccaucagaacuccguG.....      | 5    | 1 | seq |
| .....gaucuccaucagaacuccgua.....      | 19   | 0 | seq |
| .....gaucuccaucagaacuccgAa.....      | 1    | 1 | seq |
| .....gaucuccaucagaacuccguag.....     | 2    | 0 | seq |
| .....gaucuccaucagaacuccgGag.....     | 1    | 1 | seq |
| .....gaucuccaucagaacuccguagu.....    | 4    | 0 | seq |
| .....gaucuccaucagaacuccgAagu.....    | 2    | 1 | seq |
| .....gaucuccaucagaacuccguaguA.....   | 1    | 1 | seq |
| .....aCcccaucagaacuccg.....          | 8    | 1 | seq |
| .....aucccCucagaacuccg.....          | 1    | 1 | seq |
| .....aucccCaucagaacCccg.....         | 6    | 1 | seq |
| .....aucccUucagaacuccg.....          | 1    | 1 | seq |
| .....CucccCaucagaacuccg.....         | 2    | 1 | seq |
| .....NucccCaucagaacuccg.....         | 3    | 1 | seq |
| .....aucccCaucagaacuccg.....         | 2403 | 0 | seq |
| .....aucccCaucGgaacuccgu.....        | 2    | 1 | seq |
| .....aucccCaucagaacuccgG.....        | 4    | 1 | seq |
| .....GucccCaucagaacuccgu.....        | 1    | 1 | seq |
| .....aucccCaucagaGuccgu.....         | 1    | 1 | seq |
| .....auUcccCaucagaacuccgu.....       | 1    | 1 | seq |
| .....aucccCaucUgaacuccgu.....        | 1    | 1 | seq |
| .....aucccCaucagaacuccgu.....        | 125  | 0 | seq |
| .....aAcccaucagaacuccgu.....         | 1    | 1 | seq |
| .....GucccCaucagaacuccgua.....       | 1    | 1 | seq |
| .....aucccCaucagaacuccgGa.....       | 3    | 1 | seq |
| .....aucccCaucagaacuccgua.....       | 7    | 0 | seq |
| .....aucccCaucagaacuccguaUu.....     | 1    | 1 | seq |
| .....aucccCaucagaacuccguagu.....     | 4    | 0 | seq |
| .....aucccCaucagaacuccguaguuu.....   | 1    | 0 | seq |
| .....aucccCaucagaacuccguaguuaag..... | 1    | 0 | seq |
| .....ucccCaucagaacuccgG.....         | 21   | 1 | seq |
| .....ucccCaucUgaacuccgu.....         | 1    | 1 | seq |
| .....ucccCaucagaacuccgu.....         | 641  | 0 | seq |
| .....ucccCaucagaacCccgu.....         | 1    | 1 | seq |
| .....CcccCaucagaacuccgu.....         | 3    | 1 | seq |
| .....ucccCaucagaGuccgu.....          | 2    | 1 | seq |
| .....NcccCaucagaacuccgu.....         | 3    | 1 | seq |
| .....ucccCaucagaacuccgu.....         | 1    | 1 | seq |
| .....ucccCaucagGuccgu.....           | 5    | 1 | seq |
| .....ucccUucagaacuccgu.....          | 1    | 1 | seq |
| .....ucccCaucagaacuccGgu.....        | 2    | 1 | seq |
| .....ucccCaucGgaacuccgu.....         | 3    | 1 | seq |
| .....ucccCaucagaacuccguG.....        | 2    | 1 | seq |
| .....ucccCaucagaacuccgua.....        | 32   | 0 | seq |
| .....ucccCaucagaacuccguC.....        | 1    | 1 | seq |
| .....ucccCaucagaacuccgGa.....        | 10   | 1 | seq |
| .....ucccCaucagaacuccguag.....       | 5    | 0 | seq |
| .....ucccCaucagaacuccguagu.....      | 2    | 0 | seq |
| .....ucccCaucagaacuccguaguC.....     | 1    | 1 | seq |
| .....ucccCaucagaacuccguaguuu.....    | 3    | 0 | seq |
| .....ucccCaucagaacuccguaguua.....    | 5    | 0 | seq |
| .....ucccCaucagaacuccguaguuaagc..... | 2    | 0 | seq |
| .....cccCaucagaacuccgGa.....         | 3    | 1 | seq |
| .....cccCaucagaacuccguC.....         | 1    | 1 | seq |
| .....cccCaucagaacuccguG.....         | 4    | 1 | seq |
| .....cccCaucagaacuccgua.....         | 25   | 0 | seq |
| .....cccCaucagaacuccguag.....        | 1    | 0 | seq |
| .....cccCaucagaacuccgGag.....        | 1    | 1 | seq |
| .....cccCaucagaacuccguagu.....       | 3    | 0 | seq |
| .....cccCaucagaacuccguagG.....       | 1    | 1 | seq |
| .....cccCaucagaacucccgGagu.....      | 2    | 1 | seq |
| .....cccCaucagaacucccgGaguuu.....    | 1    | 1 | seq |
| .....cccCaucagaacucccgGuuu.....      | 5    | 0 | seq |
| .....cccCaucagaacuccGguaguua.....    | 1    | 1 | seq |
| .....cccCaucagaacuccGguaguua.....    | 1    | 0 | seq |
| .....cccCaucagaacuccGguaguuaa.....   | 1    | 0 | seq |
| .....ccCaucagaacuccguag.....         | 5    | 0 | seq |
| .....ccCaucagaacuccguagu.....        | 4    | 0 | seq |
| .....ccCaucagaacuccgGagu.....        | 1    | 1 | seq |



## Mature

## Star

|                                                                                                                       |   |   |     |
|-----------------------------------------------------------------------------------------------------------------------|---|---|-----|
| agggggcgugauuucugcgugcgaucauaccagcguaaauaguaacgggaucccaucagaaacuccguaguuuagcacgcuugugcuagagauaguaauugggaugggugaucuccc |   |   |     |
| .....ccaucagaacuccguaguu.....                                                                                         | 4 | 0 | seq |
| .....ccaucagaacuccguaguua.....                                                                                        | 2 | 0 | seq |
| .....ccaucagaacuccguaguuaagc.....                                                                                     | 1 | 0 | seq |
| .....caucagaacuccguagu.....                                                                                           | 1 | 0 | seq |
| .....caucagaacuccguaguu.....                                                                                          | 1 | 0 | seq |
| .....caucagaacuccguaguua.....                                                                                         | 1 | 0 | seq |
| .....caucagaacuccguaguuaa.....                                                                                        | 1 | 0 | seq |
| .....aucagaacuccguagu.....                                                                                            | 1 | 0 | seq |
| .....aucagaacuccguaguua.....                                                                                          | 2 | 0 | seq |
| .....aucagaacuccgGaguua.....                                                                                          | 1 | 1 | seq |
| .....aucagaacuccgGaguuaagc.....                                                                                       | 1 | 1 | seq |
| .....ucagaacuccguaguua.....                                                                                           | 5 | 0 | seq |
| .....ucagaacuccguaguuaag.....                                                                                         | 1 | 0 | seq |
| .....ucagaacuccguaguuaagcC.....                                                                                       | 1 | 1 | seq |
| .....cagaacuccguaguuaagc.....                                                                                         | 1 | 0 | seq |
| .....agaacuccguaguuaagc.....                                                                                          | 1 | 0 | seq |
| .....aguuaagcGcgcuugug.....                                                                                           | 1 | 1 | seq |
| .....guuaagcGcgcuugugc.....                                                                                           | 1 | 1 | seq |
| .....guuaagcGcgcuugugcuaga.....                                                                                       | 1 | 1 | seq |
| .....guuaagcGcgcuugugcuagagu.....                                                                                     | 1 | 1 | seq |
| .....guuaagcGcgcuugugcuagagua.....                                                                                    | 2 | 1 | seq |
| .....cgcuugugcuagaguaguaC.....                                                                                        | 1 | 1 | seq |
| .....cgcuugugcuagaguaguaCug.....                                                                                      | 1 | 1 | seq |
| .....cgcuugugcuagaguaguaCuggga.....                                                                                   | 1 | 1 | seq |
| .....gcuugugcuagaguagua.....                                                                                          | 1 | 0 | seq |
| .....gcuugugcuagaguaguaCugg.....                                                                                      | 1 | 1 | seq |
| .....gcuugugcuagaguaguaCugggau.....                                                                                   | 1 | 1 | seq |
| .....gcuugugcuagaguaguaCugggaug.....                                                                                  | 1 | 1 | seq |
| .....cuugugcuagaguaguaCu.....                                                                                         | 2 | 1 | seq |
| .....cuugugcuagaguaguaCuggg.....                                                                                      | 1 | 1 | seq |
| .....cuugugcuagaguaguaCuggga.....                                                                                     | 2 | 1 | seq |
| .....cuugugcuagaguaguaCugggaug.....                                                                                   | 2 | 1 | seq |
| .....cuugugcuagaguaguaCugggaugg.....                                                                                  | 1 | 1 | seq |
| .....cuugugcuagaguaguaCugggaugggug.....                                                                               | 1 | 1 | seq |
| .....uugugcuagaguaguaC.....                                                                                           | 1 | 1 | seq |
| .....uugugcuagaguaguaCu.....                                                                                          | 1 | 1 | seq |
| .....uugugcuagaguaguaCug.....                                                                                         | 1 | 1 | seq |
| .....uugugcuagaguaguaCuggggau.....                                                                                    | 1 | 1 | seq |
| .....uugugcuagaguaguaCugggaug.....                                                                                    | 1 | 1 | seq |
| .....uugugcuagaguaguaCugggaugggug.....                                                                                | 1 | 1 | seq |
| .....ugugcuagaguaguaCug.....                                                                                          | 2 | 1 | seq |
| .....ugugcuagaguaguaCugg.....                                                                                         | 2 | 1 | seq |
| .....ugugcuagaguaguaCuggga.....                                                                                       | 3 | 1 | seq |
| .....ugugcuagaguaguaCugggaug.....                                                                                     | 1 | 1 | seq |
| .....ugugcuagaguaguaCugggaugg.....                                                                                    | 1 | 1 | seq |
| .....ugugcuagaguaguaCugggauggg.....                                                                                   | 2 | 1 | seq |
| .....ugugcuagaguaguaCugggaugggu.....                                                                                  | 4 | 1 | seq |
| .....ugugcuagaguaguaCugggaugggug.....                                                                                 | 2 | 1 | seq |
| .....gcuagaguaguaauuggg.....                                                                                          | 2 | 0 | seq |
| .....gcuagaguaguaGuuggg.....                                                                                          | 1 | 1 | seq |
| .....gcuagaguaguaGuuggga.....                                                                                         | 3 | 1 | seq |
| .....gcuagaguaguaauuggga.....                                                                                         | 6 | 0 | seq |
| .....gcuagaguaguaauugggau.....                                                                                        | 2 | 0 | seq |
| .....gcuagaguaguaauugggaug.....                                                                                       | 3 | 0 | seq |
| .....gcuagaguaguaauugggaugg.....                                                                                      | 1 | 0 | seq |
| .....gcuagaguaguaauugggauggg.....                                                                                     | 2 | 0 | seq |
| .....gcuagaguaguaauugggaugggu.....                                                                                    | 1 | 0 | seq |
| .....cuagaguaguaauuggga.....                                                                                          | 3 | 0 | seq |
| .....cuagaguaguaauugggau.....                                                                                         | 1 | 0 | seq |
| .....cuagaguaguaauugggaug.....                                                                                        | 3 | 0 | seq |
| .....cuagaguaguaauugggauggg.....                                                                                      | 2 | 0 | seq |
| .....cuagaguaguaauugggaugggu.....                                                                                     | 5 | 0 | seq |
| .....cuagaguaguaauugggaugggug.....                                                                                    | 2 | 0 | seq |
| .....uagaguaguaauugggau.....                                                                                          | 4 | 0 | seq |
| .....uagaguaguaauugggaug.....                                                                                         | 2 | 0 | seq |
| .....uagaguaguaauugggauggg.....                                                                                       | 3 | 0 | seq |
| .....agaguaguaauugggaug.....                                                                                          | 1 | 0 | seq |
| .....agaguaguaauugggauggg.....                                                                                        | 1 | 0 | seq |
| .....agaguaguaauugggaugggu.....                                                                                       | 1 | 0 | seq |

Mature

Star

|                                           |                     |                             |                   |        |     |  |  |
|-------------------------------------------|---------------------|-----------------------------|-------------------|--------|-----|--|--|
| agggggcgugauucugcgugcgaucauaccagcguaaagua | ccggaucccaucagaacuc | cguaaguaaagcacgcuugugcuagag | uaguauugggaugggug | aucucc |     |  |  |
| .....                                     | gaguaguauugggaugg   | .....                       | 1                 | 0      | seq |  |  |
| .....                                     | gaguaguauugggauggg  | .....                       | 4                 | 0      | seq |  |  |
| .....                                     | gaguaguauugggaugggC | .....                       | 1                 | 1      | seq |  |  |
| .....                                     | gaguaguauugggaugggu | .....                       | 1                 | 0      | seq |  |  |
| .....                                     | aguaguauugggauggg   | .....                       | 2                 | 0      | seq |  |  |
| .....                                     | aguaguauugggaugggu  | .....                       | 3                 | 0      | seq |  |  |
| .....                                     | aguaguauugggaugggug | .....                       | 5                 | 0      | seq |  |  |
| .....                                     | guaguauugggaugggu   | .....                       | 5                 | 0      | seq |  |  |
| .....                                     | guaguauugggaugggug  | .....                       | 3                 | 0      | seq |  |  |
| .....                                     | uaguauugggaugggug   | .....                       | 8                 | 0      | seq |  |  |
| .....                                     | uaguauugggaugCgug   | .....                       | 1                 | 1      | seq |  |  |

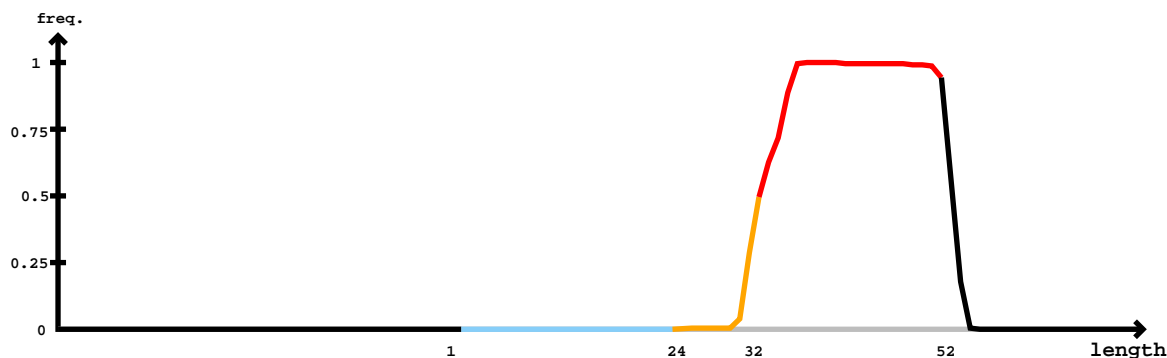

## Mature

[illegible]

## Star

## Mature

|                                                                                                                 |    |   |     |
|-----------------------------------------------------------------------------------------------------------------|----|---|-----|
| gcuguggaaaucuuuaggcaaacugauuugucaccaauucucagugaugauauuuaccaauuauuuuugugguuuguaauucccugagcauucuaauuuccauggaaaaaa |    |   |     |
| .....guuuguaauucccugGgca.....                                                                                   | 1  | 1 | seq |
| .....guuuguaauucccugagca.....                                                                                   | 10 | 0 | seq |
| .....Uuuuguaauucccugagca.....                                                                                   | 6  | 1 | seq |
| .....Uuuuguaauucccugagcau.....                                                                                  | 1  | 1 | seq |
| .....guuuguaauucccugagcau.....                                                                                  | 2  | 0 | seq |
| .....uuuguaauucccugagcC.....                                                                                    | 1  | 1 | seq |
| .....uuuguaauucccugagcG.....                                                                                    | 2  | 1 | seq |
| .....uuCguaauucccugagca.....                                                                                    | 1  | 1 | seq |
| .....uuuguaauucccugagca.....                                                                                    | 18 | 0 | seq |
| .....uuuguaauucccugagcaA.....                                                                                   | 1  | 1 | seq |
| .....uuuguaauucccugagcaC.....                                                                                   | 4  | 1 | seq |
| .....Cuuguaauucccugagcau.....                                                                                   | 1  | 1 | seq |
| .....uuuguaauucccugagcau.....                                                                                   | 6  | 0 | seq |
| .....Nuuguaauucccugagcau.....                                                                                   | 1  | 1 | seq |
| .....uuuguaauucccugagcauu.....                                                                                  | 1  | 0 | seq |
| .....uuuguaauucccugagcauA.....                                                                                  | 2  | 1 | seq |
| .....Nuuguaauucccugagcauu.....                                                                                  | 1  | 1 | seq |
| .....uuguaauucccugagcaA.....                                                                                    | 1  | 1 | seq |
| .....uuguaauucccugagcau.....                                                                                    | 15 | 0 | seq |
| .....uuguaauucccugagcaG.....                                                                                    | 1  | 1 | seq |
| .....Nuuguaauucccugagcau.....                                                                                   | 1  | 1 | seq |
| .....uuguaauucccugagcaC.....                                                                                    | 3  | 1 | seq |
| .....uuguaauucccugagcauu.....                                                                                   | 2  | 0 | seq |
| .....uuguaauucccugagcauA.....                                                                                   | 2  | 1 | seq |
| .....uguaauucccugagcauA.....                                                                                    | 1  | 1 | seq |



Provisional ID : MA\_135470\_9724  
 Score total : 22.3  
 Score for star read(s) : 3.9  
 Score for read counts : 25.6  
 Score for mfe : -4.9  
 Score for randfold : -2.2  
 Score for cons. seed :  
 Total read count : 62  
 Mature read count : 60  
 Loop read count : 1  
 Star read count : 1

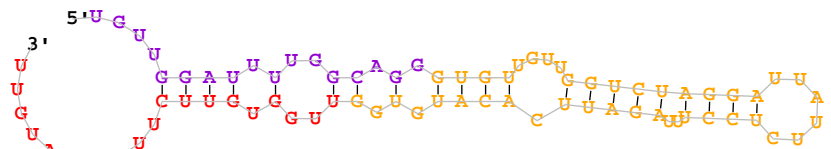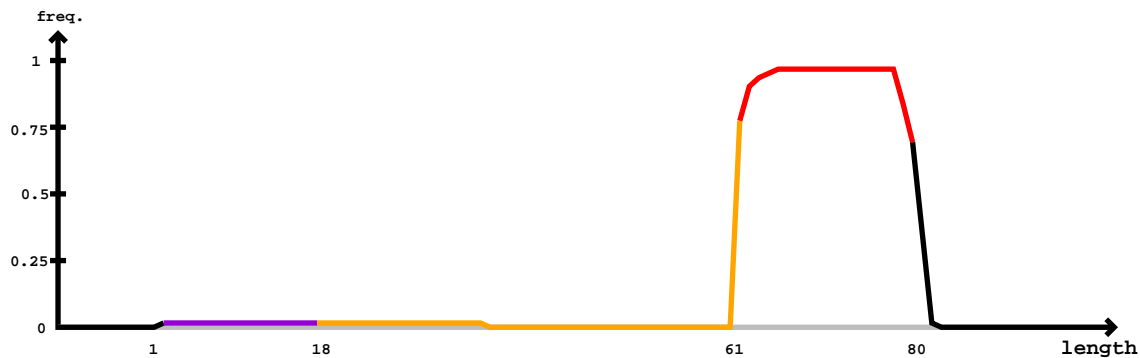

### Star

### Mature

| 5' -                                                                                                           | -3' | obs | exp | reads | mm | sample |
|----------------------------------------------------------------------------------------------------------------|-----|-----|-----|-------|----|--------|
| uaugaaggauguuggauuuuggcaggguuguuguuggucuaggauuuuucuccuuuagauucacauugguuugguuguucuuuggauguucagaugcuauaguauuuuuc |     |     |     |       |    |        |
| uaugaaggauguuggauuuuggcaggguuguuguuggucuaggauuuuucuccuuuagauucacauugguuugguuguucuuuggauguucagaugcuauaguauuuuuc |     |     |     |       |    |        |
| .....(((((((((((..((..(((.....((((((((.....))))).))))).))))..))..))))).((((.....))))).)                        |     |     |     |       |    |        |
| .....uguuggaAuuuuggcagg.....                                                                                   |     |     |     | 1     | 1  | seq    |
| .....guguuguCggucuagga.....                                                                                    |     |     |     | 1     | 1  | seq    |
| .....Augguuguucuuuggaug.....                                                                                   |     |     |     | 8     | 1  | seq    |
| .....Augguuguucuuuggaugu.....                                                                                  |     |     |     | 9     | 1  | seq    |
| .....Augguuguucuuuggauguu.....                                                                                 |     |     |     | 30    | 1  | seq    |
| .....uugguuguucuuuggauguuG.....                                                                                |     |     |     | 1     | 1  | seq    |
| .....uggCguucuuuggauguu.....                                                                                   |     |     |     | 1     | 1  | seq    |
| .....ugguuguucuuuggauguu.....                                                                                  |     |     |     | 4     | 0  | seq    |
| .....ugguuguucuuuggauguC.....                                                                                  |     |     |     | 1     | 1  | seq    |
| .....ugguuguucuuuggauguuG.....                                                                                 |     |     |     | 2     | 1  | seq    |
| .....gguguucuuuggauguu.....                                                                                    |     |     |     | 1     | 0  | seq    |
| .....gguguucuuuggauguC.....                                                                                    |     |     |     | 1     | 1  | seq    |
| .....guguucuuuggauguuG.....                                                                                    |     |     |     | 1     | 1  | seq    |
| .....uguucuuuggauguuGa.....                                                                                    |     |     |     | 1     | 1  | seq    |

Provisional ID : MA\_136180\_22594  
Score total : 19630.4  
Score for star read(s) : 3.9  
Score for read counts : 19622.8  
Score for mfe : 2.2  
Score for randfold : 1.6  
Score for cons. seed :  
Total read count : 38501  
Mature read count : 19558  
Loop read count : 0  
Star read count : 18943

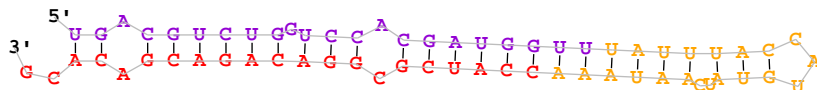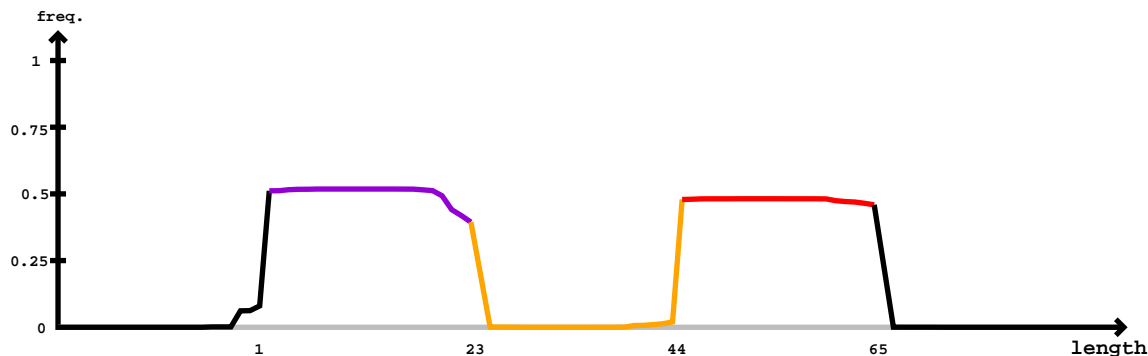

## Star

## Mature

|      |                                                                                                      |                          |                 |               |              |             |            |       |       |     |        |
|------|------------------------------------------------------------------------------------------------------|--------------------------|-----------------|---------------|--------------|-------------|------------|-------|-------|-----|--------|
| 5' - | aaagaaaagcgaagguggucuu                                                                               | ugacgucucugguccacgaugguu | uuuuuaccauguauc | aaauaaaccaucg | cgagacgacacg | agcaccuucac | cuucguguac | caugg | -3'   | obs |        |
|      | aaagaaaagcgaagguggucuu                                                                               | ugacgucucugguccacgaugguu | uuuuuaccauguauc | aaauaaaccaucg | cgagacgacacg | agcaccuucac | cuucguguac | caugg |       | exp |        |
|      | ...(((.(.((((((.(.(.(.((((((.(.(.(((((((((((((((.(...)).)).)))))))))).)))))))))).)).)).)))))).)).)). |                          |                 |               |              |             |            |       | reads | mm  | sample |
|      | ...uggucuu                                                                                           | ugacgucugg               | Acc             |               |              |             |            |       | 2     | 1   | seq    |
|      | ...ugUucuu                                                                                           | ugacgucucuggu            | cca             |               |              |             |            |       | 3     | 1   | seq    |
|      | ...uggucuu                                                                                           | ugacgucucugg             | Accac           |               |              |             |            |       | 4     | 1   | seq    |
|      | ...uggucuu                                                                                           | ugacgucugg               | Accacg          |               |              |             |            |       | 21    | 1   | seq    |
|      | ...uggucuu                                                                                           | ugacgucugg               | Gccacg          |               |              |             |            |       | 8     | 1   | seq    |
|      | ...ugUucuu                                                                                           | ugacgucucuggu            | ccacg           |               |              |             |            |       | 14    | 1   | seq    |
|      | ...gUucuu                                                                                            | ugacgucucuggu            | ccac            |               |              |             |            |       | 1     | 1   | seq    |
|      | ...ucuu                                                                                              | gacgucucugg              | Gcca            |               |              |             |            |       | 6     | 1   | seq    |
|      | ...ucuu                                                                                              | gacgucucugg              | Gccac           |               |              |             |            |       | 3     | 1   | seq    |
|      | ...ucuu                                                                                              | gacgucucugg              | Gccacg          |               |              |             |            |       | 27    | 1   | seq    |
|      | ...ucuu                                                                                              | gacgucucugg              | Accacga         |               |              |             |            |       | 63    | 1   | seq    |
|      | ...ucuu                                                                                              | gacgucucugg              | Gccacga         |               |              |             |            |       | 2     | 1   | seq    |
|      | ...ucuu                                                                                              | gacgucucugg              | Accacgau        |               |              |             |            |       | 678   | 1   | seq    |
|      | ...ucuu                                                                                              | gacgucucugg              | Gccacgau        |               |              |             |            |       | 6     | 1   | seq    |
|      | ...ucuu                                                                                              | gacgucucugg              | Accacgaug       |               |              |             |            |       | 1507  | 1   | seq    |
|      | ...ucuu                                                                                              | gacgucucugg              | Gccacgaug       |               |              |             |            |       | 157   | 1   | seq    |
|      | ...ucuu                                                                                              | gacgucucugg              | Accacgaugg      |               |              |             |            |       | 1     | 1   | seq    |
|      | ...ucuu                                                                                              | gacgucucugg              | Accacgauggu     |               |              |             |            |       | 38    | 1   | seq    |
|      | ...ucuu                                                                                              | gacgucucugg              | Accacgaugguu    |               |              |             |            |       | 11    | 1   | seq    |
|      | ...ucuu                                                                                              | gacgucucugg              | Accacgaugguuu   |               |              |             |            |       | 3     | 1   | seq    |
|      | ...cuu                                                                                               | gacgucucugg              | Gccacg          |               |              |             |            |       | 26    | 1   | seq    |
|      | ...cuu                                                                                               | gacgucucugg              | Accacgau        |               |              |             |            |       | 1     | 1   | seq    |
|      | ...cuu                                                                                               | gacgucucugg              | Accacgaug       |               |              |             |            |       | 1     | 1   | seq    |
|      | ...cuu                                                                                               | gacgucucugg              | Accacgauggu     |               |              |             |            |       | 1     | 1   | seq    |
|      | ...uug                                                                                               | acgucucugg               | Gccacg          |               |              |             |            |       | 12    | 1   | seq    |
|      | ...uug                                                                                               | acgucucugg               | Accacga         |               |              |             |            |       | 8     | 1   | seq    |
|      | ...uug                                                                                               | acgucucugg               | Accacgau        |               |              |             |            |       | 28    | 1   | seq    |
|      | ...uug                                                                                               | acgucucugg               | Accacgaug       |               |              |             |            |       | 41    | 1   | seq    |
|      | ...uug                                                                                               | acgucucugg               | Gccacgaugg      |               |              |             |            |       | 2     | 1   | seq    |
|      | ...uug                                                                                               | acgucucugg               | Accacgauggg     |               |              |             |            |       | 597   | 1   | seq    |
|      | ...uug                                                                                               | acgucucugg               | Gccacgauggu     |               |              |             |            |       | 6     | 1   | seq    |
|      | ...uug                                                                                               | acgucucugg               | Accacgauggu     |               |              |             |            |       | 16    | 1   | seq    |
|      | ...uug                                                                                               | acgucucugg               | Accacgaugguu    |               |              |             |            |       | 14    | 1   | seq    |

## Star

## Mature

|                                                                                                                 |     |   |     |
|-----------------------------------------------------------------------------------------------------------------|-----|---|-----|
| aaagaaagcgaagguggucuuugacgucuggguccacgaugguuuauuuuaccauguaucaauaaaccaucgcgagacagacagcagcaccuucacccuucguguacaugg |     |   |     |
| .....Augacgucuggguccacgaugguu.....                                                                              | 6   | 1 | seq |
| .....Cugacgucuggguccacgaugguu.....                                                                              | 3   | 1 | seq |
| .....uugacgucugggAccacgaugguuu.....                                                                             | 4   | 1 | seq |
| .....uugacgucugggGccacgaugguuu.....                                                                             | 1   | 1 | seq |
| .....ugacgucuggguccacUa.....                                                                                    | 1   | 1 | seq |
| .....ugacgucugggGccacga.....                                                                                    | 1   | 1 | seq |
| .....ugacgucuggguccacCa.....                                                                                    | 2   | 1 | seq |
| .....ugacgucuggguccacga.....                                                                                    | 39  | 0 | seq |
| .....ugacgucCgguccacga.....                                                                                     | 1   | 1 | seq |
| .....ugaGgucuggguccacga.....                                                                                    | 1   | 1 | seq |
| .....ugacgucuggguccGcgau.....                                                                                   | 1   | 1 | seq |
| .....ugacgucuggguccacgaG.....                                                                                   | 4   | 1 | seq |
| .....uAacgucuggguccacgau.....                                                                                   | 1   | 1 | seq |
| .....ugacgucugggAccacgau.....                                                                                   | 2   | 1 | seq |
| .....ugacgucuggguccacgGu.....                                                                                   | 1   | 1 | seq |
| .....ugacgucugggucUacgau.....                                                                                   | 1   | 1 | seq |
| .....ugacgucuggguccacgaC.....                                                                                   | 16  | 1 | seq |
| .....Cgacgucuggguccacgau.....                                                                                   | 1   | 1 | seq |
| .....ugacgucuggguccacgau.....                                                                                   | 60  | 0 | seq |
| .....ugacgucugggGccacgau.....                                                                                   | 3   | 1 | seq |
| .....ugacgucuggguccacgaCg.....                                                                                  | 3   | 1 | seq |
| .....ugacgucuggguccAacgaug.....                                                                                 | 1   | 1 | seq |
| .....ugacgucuggguccacgauU.....                                                                                  | 6   | 1 | seq |
| .....ugacgucuggguccacgGug.....                                                                                  | 1   | 1 | seq |
| .....ugacgucuggguccacgaug.....                                                                                  | 399 | 0 | seq |
| .....ugacgucuggguccacgaAg.....                                                                                  | 1   | 1 | seq |
| .....ugacgucugggGccacgaug.....                                                                                  | 1   | 1 | seq |
| .....ugacgucuggguccGcgau.....                                                                                   | 2   | 1 | seq |
| .....ugGcgucuggguccacgaug.....                                                                                  | 4   | 1 | seq |
| .....ugacgucuggguccacgauC.....                                                                                  | 1   | 1 | seq |
| .....ugacgucCgguccacgaug.....                                                                                   | 2   | 1 | seq |
| .....ugacgucuggguccacgauA.....                                                                                  | 16  | 1 | seq |
| .....ugacgucuggguccacgaGg.....                                                                                  | 1   | 1 | seq |
| .....ugacCucuggguccacgaug.....                                                                                  | 1   | 1 | seq |
| .....ugacgucugggAccacgaug.....                                                                                  | 3   | 1 | seq |
| .....Agacgucuggguccacgaugg.....                                                                                 | 1   | 1 | seq |
| .....ugaUgucuggguccacgaugg.....                                                                                 | 1   | 1 | seq |
| .....ugacgucuggguccacAaugg.....                                                                                 | 1   | 1 | seq |
| .....ugacgucugggGccacgaugg.....                                                                                 | 1   | 1 | seq |
| .....ugacgucugggAccacgaugg.....                                                                                 | 8   | 1 | seq |
| .....ugacgCcuggguccacgaugg.....                                                                                 | 1   | 1 | seq |
| .....ugacgucuggguccacgaugC.....                                                                                 | 5   | 1 | seq |
| .....ugacgucuggguccacgaCgg.....                                                                                 | 1   | 1 | seq |
| .....Cgacgucuggguccacgaugg.....                                                                                 | 1   | 1 | seq |
| .....ugacgucuggguccacgaugA.....                                                                                 | 16  | 1 | seq |
| .....ugacgucCgguccacgaugg.....                                                                                  | 1   | 1 | seq |
| .....ugGcgucuggguccacgaugg.....                                                                                 | 1   | 1 | seq |
| .....ugacgucuggguccacgaugg.....                                                                                 | 257 | 0 | seq |
| .....ugacgucugguUcacgaugg.....                                                                                  | 2   | 1 | seq |
| .....ugacgucuggguccacgaugU.....                                                                                 | 7   | 1 | seq |
| .....ugacgucugggCccacgaugg.....                                                                                 | 1   | 1 | seq |
| .....ugacgucuggguccacgGuggu.....                                                                                | 3   | 1 | seq |
| .....ugacgucugggAccacgauggu.....                                                                                | 172 | 1 | seq |
| .....ugacgucuggguccacgauggC.....                                                                                | 108 | 1 | seq |
| .....ugacgucuggguccacgauggG.....                                                                                | 9   | 1 | seq |
| .....ugacgucuggguccacgaugAu.....                                                                                | 5   | 1 | seq |
| .....ugacgucuCguccacgauggu.....                                                                                 | 1   | 1 | seq |
| .....Ggacgucuggguccacgauggu.....                                                                                | 1   | 1 | seq |
| .....ugacgucugggGccacgauggu.....                                                                                | 8   | 1 | seq |
| .....ugacgucuggguccacgaugUu.....                                                                                | 2   | 1 | seq |
| .....ugacgucUAguccacgauggu.....                                                                                 | 1   | 1 | seq |
| .....ugacgucugAuccacgauggu.....                                                                                 | 1   | 1 | seq |
| .....Cgacgucuggguccacgauggu.....                                                                                | 1   | 1 | seq |
| .....ugacgucuggguccUcgauggu.....                                                                                | 1   | 1 | seq |
| .....ugaUgucuggguccacgauggu.....                                                                                | 2   | 1 | seq |
| .....Agacgucuggguccacgauggu.....                                                                                | 1   | 1 | seq |
| .....ugacgucuggguccacgaugCu.....                                                                                | 3   | 1 | seq |
| .....ugacgucuggguccacgauggA.....                                                                                | 7   | 1 | seq |
| .....ugGcgucuggguccacgauggu.....                                                                                | 2   | 1 | seq |
| .....ugacgucuggguccacgauggu.....                                                                                | 611 | 0 | seq |



## Star

## Mature

aaagaaagcgaagguggucuuugacgucuggguccacgaugguuuauuuaccauguaucaauaaaccaucgcgagacgacagcagcaccuucacccuucguguacaugg

|                                     |       |   |     |
|-------------------------------------|-------|---|-----|
| .....ugacgucuggguccGcgauggu.....    | 1     | 1 | seq |
| .....ugacgucugggucUacgauggu.....    | 1     | 1 | seq |
| .....ugacgucugggCccacgauggu.....    | 36    | 1 | seq |
| .....uUacgucuggguccacgauggu.....    | 34    | 1 | seq |
| .....ugacgucugCuccacgauggu.....     | 2     | 1 | seq |
| .....ugacgucuggguccUcgauggu.....    | 12    | 1 | seq |
| .....ugacgucuggguccacgaugguA.....   | 198   | 1 | seq |
| .....ugacgucugguGcacgauggu.....     | 1     | 1 | seq |
| .....ugacguAugguccacgauggu.....     | 1     | 1 | seq |
| .....ugacgucuggguccacgaugguA.....   | 22    | 1 | seq |
| .....ugacgucuggguccacgaugguCu.....  | 70    | 1 | seq |
| .....ugacgucUguccacgauggu.....      | 2     | 1 | seq |
| .....ugacgucuggguccacgaugUuu.....   | 2     | 1 | seq |
| .....Ggacgucuggguccacgauggu.....    | 24    | 1 | seq |
| .....ugacgucuggguccacgaCggu.....    | 18    | 1 | seq |
| .....ugacgucuggguccacgaAggu.....    | 5     | 1 | seq |
| .....ugacgucCgguccacgauggu.....     | 22    | 1 | seq |
| .....ugacgucugUuccacgauggu.....     | 2     | 1 | seq |
| .....ugacgucuggguccacgauAgu.....    | 10    | 1 | seq |
| .....ugacgucuggguccacgaugAuu.....   | 15    | 1 | seq |
| .....ugacgucAggguccacgauggu.....    | 9     | 1 | seq |
| .....uCacgucuggguccacgauggu.....    | 5     | 1 | seq |
| .....ugacgucuggguccGcgauggu.....    | 38    | 1 | seq |
| .....ugacgucuggguccacgauggu.....    | 12393 | 0 | seq |
| .....ugacgGcuggguccacgauggu.....    | 4     | 1 | seq |
| .....ugGcugucuggguccacgauggu.....   | 54    | 1 | seq |
| .....ugacgucuggguccacAauggu.....    | 14    | 1 | seq |
| .....ugacgucGgguccacgauggu.....     | 1     | 1 | seq |
| .....ugacgucuggguccacUauggu.....    | 1     | 1 | seq |
| .....ugacguUuggguccacgauggu.....    | 10    | 1 | seq |
| .....ugacgucuggguccaGgauggu.....    | 1     | 1 | seq |
| .....ugacgucuggguccacgGuggu.....    | 39    | 1 | seq |
| .....ugacgucuggguccacgauggu.....    | 35    | 1 | seq |
| .....ugacgucugguAacacgauggu.....    | 2     | 1 | seq |
| .....ugacgucugAuccacgauggu.....     | 12    | 1 | seq |
| .....ugacCucuggguccacgauggu.....    | 2     | 1 | seq |
| .....ugacgCcuggguccacgauggu.....    | 30    | 1 | seq |
| .....uAacgucuggguccacgauggu.....    | 16    | 1 | seq |
| .....Agacgucuggguccacgauggu.....    | 14    | 1 | seq |
| .....ugacgucugggucGacgauggu.....    | 3     | 1 | seq |
| .....Cgacgucuggguccacgauggu.....    | 36    | 1 | seq |
| .....ugacgucuggguccacgCuggu.....    | 1     | 1 | seq |
| .....ugacgucuggguccacgaugCuu.....   | 1     | 1 | seq |
| .....ugUcgucuggguccacgauggu.....    | 5     | 1 | seq |
| .....ugacgucugggucUacgauggu.....    | 22    | 1 | seq |
| .....Ngacgucuggguccacgauggu.....    | 18    | 1 | seq |
| .....ugacgucuggguccacgaugguC.....   | 1935  | 1 | seq |
| .....ugacgucugguUcacgauggu.....     | 10    | 1 | seq |
| .....ugacgucuggguccacgaugguG.....   | 251   | 1 | seq |
| .....uNacgucuggguccacgauggu.....    | 1     | 1 | seq |
| .....ugaUgucuggguccacgauggu.....    | 12    | 1 | seq |
| .....ugacgucuggguccacgUuggu.....    | 5     | 1 | seq |
| .....ugacUucuggguccacgauggu.....    | 1     | 1 | seq |
| .....ugacgucuAguccacgauggu.....     | 15    | 1 | seq |
| .....ugacgucuggguccCcgauggu.....    | 3     | 1 | seq |
| .....ugacgucugggGccacgauggu.....    | 219   | 1 | seq |
| .....ugacgucuggguccacgaGggu.....    | 3     | 1 | seq |
| .....ugacgucugggAccacgauggu.....    | 15    | 1 | seq |
| .....ugaAguucuggguccacgauggu.....   | 2     | 1 | seq |
| .....ugaGgucuggguccacgauggu.....    | 1     | 1 | seq |
| .....ugacAucuggguccacgauggu.....    | 14    | 1 | seq |
| .....ugacgucuggguccacgauUgu.....    | 3     | 1 | seq |
| .....ugacgucuggguccaAgauggu.....    | 3     | 1 | seq |
| .....ugacgucuggguccacgaugguA.....   | 7     | 1 | seq |
| .....ugacgucuggguccGcgaugguuu.....  | 1     | 1 | seq |
| .....ugacgucuggguccacgaugguuu.....  | 55    | 0 | seq |
| .....ugacgucuggguccacgaugguuC.....  | 244   | 1 | seq |
| .....ugacgucugggAaccacgaugguuu..... | 4     | 1 | seq |
| .....ugacgucuggguccacgaugguuG.....  | 3     | 1 | seq |
| .....ugacgucugggGccacgaugguuu.....  | 3     | 1 | seq |

## Star

## Mature

|                       |                              |    |   |     |
|-----------------------|------------------------------|----|---|-----|
| aaagaaagcgaagguggucuu | ugacgucugguccacgaugguuA      | 7  | 1 | seq |
|                       | ugacgucugguccacgaugguuCa     | 1  | 1 | seq |
|                       | ugacgucugguccacgaugguuGa     | 1  | 1 | seq |
|                       | ugacgucugguccacgaugguuuC     | 2  | 1 | seq |
|                       | ugacgucugguccacgaugguuuG     | 1  | 1 | seq |
|                       | ugacgucugguccacgaugguuuU     | 3  | 1 | seq |
|                       | ugacgucugguccacgaugguuuCu    | 2  | 1 | seq |
|                       | ugacgucugguccacgaugguuuGau   | 1  | 1 | seq |
|                       | ugacgucugguccacgaugguuuUu    | 2  | 1 | seq |
|                       | ugacgucugguccacgaugguuuuCu   | 1  | 1 | seq |
|                       | ugacgucugguccacgaugguuuCauu  | 1  | 1 | seq |
|                       | ugacgucugguccacgaugguuuauu   | 1  | 0 | seq |
|                       | gacgucuggAccacgau            | 1  | 1 | seq |
|                       | gacgucugguccacgaug           | 1  | 0 | seq |
|                       | gacgucuggAccacgaugguu        | 1  | 1 | seq |
|                       | Uacgucugguccacgaugguu        | 1  | 1 | seq |
|                       | gacgucugguccacgaugguu        | 6  | 0 | seq |
|                       | gacgucuggGccacgaugguu        | 2  | 1 | seq |
|                       | gacgucugguccacAaugguu        | 1  | 1 | seq |
|                       | gacgucugguccacgaugguuC       | 1  | 1 | seq |
|                       | gacgucuggAccacgaugguuu       | 1  | 1 | seq |
|                       | acgucuggGccacgaug            | 12 | 1 | seq |
|                       | acgucugguccacgaug            | 2  | 0 | seq |
|                       | acgucuggGccacgaugg           | 3  | 1 | seq |
|                       | acgucugguccacgaugg           | 1  | 0 | seq |
|                       | acgucuggGccacgauggu          | 6  | 1 | seq |
|                       | acgucugguccacgauggA          | 1  | 1 | seq |
|                       | acgucuggGccacgaugguu         | 76 | 1 | seq |
|                       | acgucuggAccacgaugguu         | 6  | 1 | seq |
|                       | acgucugguccacgaugguuC        | 2  | 1 | seq |
|                       | acgucugguccacgaugguu         | 4  | 0 | seq |
|                       | acgucuggGccacgaugguuu        | 22 | 1 | seq |
|                       | acgucuggAccacgaugguuu        | 21 | 1 | seq |
|                       | cgucuggAccacgaugg            | 1  | 1 | seq |
|                       | cgucugguccacgaugg            | 2  | 0 | seq |
|                       | cgucAugguccacgauggu          | 1  | 1 | seq |
|                       | cgucugguccacgauggu           | 7  | 0 | seq |
|                       | cgucuggAccacgaugguu          | 1  | 1 | seq |
|                       | cgucugguccacgaugguu          | 4  | 0 | seq |
|                       | cgucugguccacgaugguuC         | 1  | 1 | seq |
|                       | cgucuggGccacgaugguu          | 44 | 1 | seq |
|                       | cgucuggGccacgaugguuu         | 2  | 1 | seq |
|                       | cgucuggAccacgaugguuu         | 3  | 1 | seq |
|                       | gucugguccacgauggu            | 3  | 0 | seq |
|                       | gucugguccacgaugguu           | 3  | 0 | seq |
|                       | gucugguccacgaugguuC          | 1  | 1 | seq |
|                       | ucugguccacgaugguu            | 13 | 0 | seq |
|                       | ucugguccacgaugguuC           | 3  | 1 | seq |
|                       | ucugguccacgaugguuu           | 1  | 0 | seq |
|                       | ucugguccacgaugguuuu          | 1  | 0 | seq |
|                       | ucuggAccacgaugguuuuu         | 7  | 1 | seq |
|                       | ucugguccacgaugguuuuuu        | 4  | 0 | seq |
|                       | ucuggGccacgaugguuuuuu        | 2  | 1 | seq |
|                       | ucugguccacgauggCuuuuu        | 1  | 1 | seq |
|                       | ugCaucauaaaaccaucgcggac      | 1  | 1 | seq |
|                       | Caucauaaaaccaucgcgga         | 1  | 1 | seq |
|                       | aucauaaaaccaucgcggacagacg    | 1  | 0 | seq |
|                       | aucauaaaaccaucgcggacagacga   | 1  | 0 | seq |
|                       | aucauaaaaccaucgcggacagacgaU  | 1  | 1 | seq |
|                       | ucauaaaaccaucgcggaca         | 1  | 0 | seq |
|                       | ucauaaaaccaucgcggacagac      | 1  | 0 | seq |
|                       | ucauaaaaccaucgcggacagacagaUg | 1  | 1 | seq |
|                       | aauaaaaccaucgcggacagGc       | 1  | 1 | seq |
|                       | aauaaaaccaucgcggacagac       | 9  | 0 | seq |
|                       | aauaaaaccaucgcggacagaUg      | 1  | 1 | seq |
|                       | aauaaaaccaucgcggacagacg      | 1  | 0 | seq |
|                       | auaaaccaucgcggaca            | 1  | 0 | seq |
|                       | auaaaccaucgcggacagU          | 1  | 1 | seq |

## Star

## Mature

aaagaaagcgaagguggucuuagacgucugguccacgaugguuauuuuaccauguaucaauaaaccaucgcgagacagacagcagcaccuucacccuucguguacauagg

|                                         |     |   |     |
|-----------------------------------------|-----|---|-----|
| .....a.aaacccaucgcgagacagaU.....        | 2   | 1 | seq |
| .....a.aaacccaucgcgagacagac.....        | 4   | 0 | seq |
| .....N.aaacccaucgcgagacagacg.....       | 1   | 1 | seq |
| .....a.aaacccaucgcgagacagacg.....       | 1   | 1 | seq |
| .....a.aaacccaUgcgagacagacg.....        | 2   | 1 | seq |
| .....a.aaacccaucgcgagacagacU.....       | 2   | 1 | seq |
| .....a.aaacccaucgcgagacagacC.....       | 2   | 1 | seq |
| .....a.aaacccaucgcgagacCgacg.....       | 1   | 1 | seq |
| .....a.aaacccaucgcgagacagacg.....       | 204 | 0 | seq |
| .....a.aaacccaucgcgagacagaAg.....       | 1   | 1 | seq |
| .....a.aaacccaucgcgagacagaUg.....       | 1   | 1 | seq |
| .....a.aaacccaucgcgagacagCg.....        | 2   | 1 | seq |
| .....a.aaacccaucgcgagacagacA.....       | 18  | 1 | seq |
| .....a.aaacccaucgUggagacagacg.....      | 1   | 1 | seq |
| .....a.aaacccaucUcgagacagacg.....       | 1   | 1 | seq |
| .....a.aaacccaucgcgagacGgacg.....       | 2   | 1 | seq |
| .....a.aaacccaucgcgagacagacga.....      | 1   | 0 | seq |
| .....a.aaacccaucgcgagacagacgC.....      | 1   | 1 | seq |
| .....u.aaaccCucgagacag.....             | 1   | 1 | seq |
| .....u.aaacccaucgcgagacagacg.....       | 20  | 0 | seq |
| .....u.aaacccaucgcgagacagacA.....       | 1   | 1 | seq |
| .....u.aaacccaucgcgagacagaAg.....       | 1   | 1 | seq |
| .....u.aaacccaucgcgagacagacgac.....     | 1   | 0 | seq |
| .....u.aaacccaucgcgagacagacagaca.....   | 1   | 0 | seq |
| .....u.aaacccaucgcgagacagacagaAa.....   | 1   | 1 | seq |
| .....u.aaacccaucgcgagacagacagacaUg..... | 2   | 1 | seq |
| .....a.aaacccaucgcgagacagacg.....       | 5   | 0 | seq |
| .....a.aaacccaucgcgagacagacU.....       | 1   | 1 | seq |
| .....a.aaacccaucgcgagacagacga.....      | 2   | 0 | seq |
| .....a.aaacccaucgcgagacGgacgac.....     | 1   | 1 | seq |
| .....a.aaacccaucgcgagacagacgaU.....     | 1   | 1 | seq |
| .....a.aaacccaucgcgagacagacgac.....     | 17  | 0 | seq |
| .....a.aaacccaucgcgagacagacagaca.....   | 2   | 0 | seq |
| .....a.aaacccaucgcgagacagacagacaUg..... | 94  | 1 | seq |
| .....a.aaacccaucgcgagacagacagacg.....   | 4   | 0 | seq |
| .....a.aaacccaucgcgagacagacagacga.....  | 1   | 0 | seq |
| .....a.aaacccaucgcgagacagacgac.....     | 4   | 0 | seq |
| .....a.aaacccaucgcgagacagacgacG.....    | 1   | 1 | seq |
| .....a.aaacccaucgcgagacagacagaca.....   | 33  | 0 | seq |
| .....a.aaacccaucgcgagacagacagacaUg..... | 83  | 1 | seq |
| .....a.aaacccaucgcgagacagacagacagc..... | 1   | 0 | seq |
| .....a.aaacccaucgcgagacagacagacagG..... | 1   | 1 | seq |
| .....a.aaacccaucgcgagacagacg.....       | 5   | 0 | seq |
| .....a.aaacccaucgcgagacagacgU.....      | 1   | 1 | seq |
| .....a.aaacccaucgcgagacagacga.....      | 1   | 0 | seq |
| .....a.aaacccaucgcgagacagacagaca.....   | 4   | 0 | seq |
| .....a.aaacccaucgcgagacagacagacac.....  | 1   | 1 | seq |
| .....a.aaacccaucgcgagacagacagacaU.....  | 3   | 1 | seq |
| .....a.aaacccaucgcgagacagacagacg.....   | 4   | 0 | seq |
| .....a.aaacccaucgcgagacagacagacaUg..... | 270 | 1 | seq |
| .....a.aaacccaucgcgagacagacagacagG..... | 2   | 1 | seq |
| .....a.aaacccaucgcgagacagacagacA.....   | 1   | 1 | seq |
| .....c.aaacccaucgcgagacagacga.....      | 112 | 0 | seq |
| .....c.aaacccaucgcgagacagacgG.....      | 5   | 1 | seq |
| .....c.aaacccaucgcgagacagacgC.....      | 1   | 1 | seq |
| .....c.Uaaacccaucgcgagacagacga.....     | 1   | 1 | seq |
| .....c.aaacccaucgcgagacagacga.....      | 1   | 1 | seq |
| .....c.aaacccaucgcgagacagacga.....      | 1   | 1 | seq |
| .....c.aaacccaucgcgagacGgacga.....      | 1   | 1 | seq |
| .....c.aaacccaucgcgagacagacgU.....      | 1   | 1 | seq |
| .....c.aaacccaucgcgagacagacga.....      | 1   | 1 | seq |
| .....c.aaacccaucgGgagacagacga.....      | 1   | 1 | seq |
| .....c.aaacccaucgUgagacagacgac.....     | 1   | 1 | seq |
| .....c.aaacccaucgagacagacgac.....       | 1   | 1 | seq |
| .....c.aaacccaucgagacagUcgac.....       | 1   | 1 | seq |
| .....c.aaacccaucgagacagacgaU.....       | 4   | 1 | seq |
| .....c.aaacccaucgagacagacgac.....       | 1   | 1 | seq |
| .....c.aaacccaucgagacagacga.....        | 41  | 0 | seq |
| .....c.aaacccaucgagacagacgac.....       | 2   | 1 | seq |
| .....c.aaacccaucgagacagacgac.....       | 1   | 1 | seq |

## Star

## Mature

|                                                                                                                     |       |   |     |
|---------------------------------------------------------------------------------------------------------------------|-------|---|-----|
| aaagaaagcgaagguggucuuugacgcucugguccacgaugguuuauuuuaccauguaucaauaaaccaucgcggaacagacgacagcagcaccuucacccuucguguacauagg |       |   |     |
| .....ccaucgcggaacagacgacG.....                                                                                      | 6     | 1 | seq |
| .....ccaucgcggaacagacgaca.....                                                                                      | 138   | 0 | seq |
| .....ccaucgcggaacagCcagaca.....                                                                                     | 1     | 1 | seq |
| .....ccaucgcggaacagacgaU.....                                                                                       | 1     | 1 | seq |
| .....ccaucgcggaacagacgaca.....                                                                                      | 1     | 1 | seq |
| .....ccaucgcggaacagCcagaca.....                                                                                     | 1     | 1 | seq |
| .....ccaucgcggaacagacgaA.....                                                                                       | 1     | 1 | seq |
| .....ccaucgcggaacagacgacac.....                                                                                     | 1     | 1 | seq |
| .....ccaucgcggaacagacgacaG.....                                                                                     | 9     | 1 | seq |
| .....ccaucgcggaacagacgacaA.....                                                                                     | 2     | 1 | seq |
| .....ccaucgcggaacagacgacac.....                                                                                     | 23    | 0 | seq |
| .....ccaucgcggaacagacgacaU.....                                                                                     | 193   | 1 | seq |
| .....ccaucgcggaacagacgacacg.....                                                                                    | 1     | 1 | seq |
| .....ccaucgcggaacagacgacacC.....                                                                                    | 2     | 1 | seq |
| .....ccaucgcggaacagacgacacG.....                                                                                    | 1     | 1 | seq |
| .....ccaucgcggaacagacgacacg.....                                                                                    | 126   | 0 | seq |
| .....cUaucgcggaacagacgacacg.....                                                                                    | 1     | 1 | seq |
| .....ccaucgcggaacagacgacaA.....                                                                                     | 25    | 1 | seq |
| .....Uaucgcggaacagacgacacg.....                                                                                     | 1     | 1 | seq |
| .....ccaucgcggaacagCcagacacg.....                                                                                   | 2     | 1 | seq |
| .....ccaucgcggaacagacgacaG.....                                                                                     | 72    | 1 | seq |
| .....ccaucgcggaacagacgacacg.....                                                                                    | 1     | 1 | seq |
| .....ccaucgcggaacagacgacacA.....                                                                                    | 2     | 1 | seq |
| .....ccaucgcggaacagacgacaU.....                                                                                     | 18236 | 1 | seq |
| .....ccaucgcggaacagacgacaUga.....                                                                                   | 1     | 1 | seq |
| .....ccaucgcggaacagacgacacCa.....                                                                                   | 1     | 1 | seq |
| .....ccaucgcggaacagacgacaUgag.....                                                                                  | 5     | 1 | seq |
| .....ccaucgcggaacagacgacaUgagcaccuu.....                                                                            | 1     | 1 | seq |
| .....caucgcggaacagacgaca.....                                                                                       | 2     | 0 | seq |
| .....caucgcggaacagacgacaUg.....                                                                                     | 35    | 1 | seq |
| .....aucgcggaacagacgaca.....                                                                                        | 2     | 0 | seq |
| .....aucgcggaacagacgacaUg.....                                                                                      | 59    | 1 | seq |
| .....aucgcggaacagacgacaUga.....                                                                                     | 2     | 1 | seq |
| .....ucgcggaacagacgacaUg.....                                                                                       | 5     | 1 | seq |
| .....cgcggaacagacgacaUg.....                                                                                        | 2     | 1 | seq |
| .....gcggaacagacgacaUgagcacc.....                                                                                   | 1     | 1 | seq |
| .....cggaacagacgacaUgagcacc.....                                                                                    | 5     | 1 | seq |
| .....cggaacagacgacaUgagcaccu.....                                                                                   | 1     | 1 | seq |

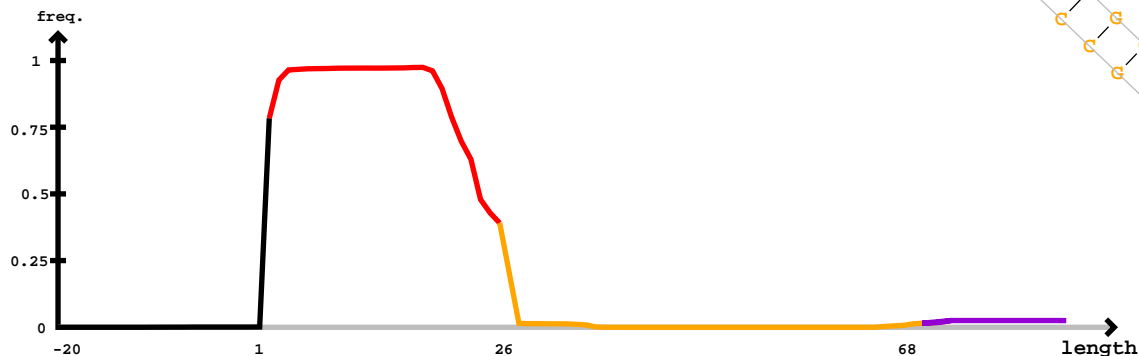

Star

| 5' | acaggggaauaacgaacgauagcgggguaagaguaauuuggcgcacucgcagggccuuauuuauuuauuuggggccugaaaacuuucggguucgaauccugccucgcgcucc  | -3'   | obs |        |
|----|-------------------------------------------------------------------------------------------------------------------|-------|-----|--------|
|    | acaggggaauaacgaacgauagcgggguaagaguaauuuggcgcacucgcagggccuuauuuauuuauuuggggccugaaaacuuucggguucggaauccugccucgcgcucc |       | exp |        |
|    | .....((((((((.....((((((((((((((((((((.....)))))))))).....))))).))))).))))).)))).....                             | reads | mm  | sample |
|    | .....auaacgaacgauagcgggguaaga.....                                                                                | 1     | 0   | seq    |
|    | .....auaacgaacgauagcgggguaagag.....                                                                               | 1     | 0   | seq    |
|    | .....uaacgaacgauagcgggguaagag.....                                                                                | 1     | 0   | seq    |
|    | .....aacgaacgauagcgggguaagagua.....                                                                               | 1     | 0   | seq    |
|    | .....cgaacgauagcgggguaagaguaauuuggu.....                                                                          | 1     | 0   | seq    |
|    | .....cgaacgauagcgggguaagaguaauuuggcgcacucgcagggccCu.....                                                          | 1     | 1   | seq    |
|    | .....Gagcgggguaagaguaauuuggc.....                                                                                 | 1     | 1   | seq    |
|    | .....Cagcgggguaagaguaauuuggcgc.....                                                                               | 2     | 1   | seq    |
|    | .....agcgggguaagaguaaaUU.....                                                                                     | 104   | 0   | seq    |
|    | .....agcgggguaagCguaaUU.....                                                                                      | 1     | 1   | seq    |
|    | .....agcgggguaagagCaaUU.....                                                                                      | 1     | 1   | seq    |
|    | .....agcggggCagaguaaaUU.....                                                                                      | 2     | 1   | seq    |
|    | .....agcgggguaagaguGauUU.....                                                                                     | 1     | 1   | seq    |
|    | .....agcgggguaagaguaaaUA.....                                                                                     | 1     | 1   | seq    |
|    | .....agcggggGagaguaaaUU.....                                                                                      | 1     | 1   | seq    |
|    | .....agcgggguaagaguaaaUC.....                                                                                     | 9     | 1   | seq    |
|    | .....agcAGggguagaguaaaUUG.....                                                                                    | 1     | 1   | seq    |
|    | .....agcgggguaagGguaaUUG.....                                                                                     | 3     | 1   | seq    |
|    | .....GgcgggguaagaguaaaUUG.....                                                                                    | 2     | 1   | seq    |
|    | .....agcgggguaagaguaaaUUU.....                                                                                    | 2     | 1   | seq    |
|    | .....agcggggCagaguaaaUUG.....                                                                                     | 2     | 1   | seq    |
|    | .....agcgggguaagaguaaaUAG.....                                                                                    | 1     | 1   | seq    |
|    | .....agcgggguaagaguaaaUUG.....                                                                                    | 454   | 0   | seq    |
|    | .....agcggUGuaagaguaaaUUG.....                                                                                    | 1     | 1   | seq    |
|    | .....agcgggguaagagCaaUUG.....                                                                                     | 3     | 1   | seq    |
|    | .....agcggggGagaguaaaUUG.....                                                                                     | 1     | 1   | seq    |
|    | .....agcgggguaagaguaaaUGG.....                                                                                    | 1     | 1   | seq    |
|    | .....agcgggguaagaguaGUUG.....                                                                                     | 2     | 1   | seq    |
|    | .....agcgggguaagaguaaCUG.....                                                                                     | 2     | 1   | seq    |
|    | .....agcgggguaagaguaaaUCG.....                                                                                    | 2     | 1   | seq    |
|    | .....agcgggguaagaguaaaUA.....                                                                                     | 13    | 1   | seq    |
|    | .....agcgggguaagCguaaUUG.....                                                                                     | 1     | 1   | seq    |
|    | .....agcgggguaagaguaaaUUGA.....                                                                                   | 50    | 1   | seq    |

## Mature

## Star

|                                                                                                                |     |   |     |
|----------------------------------------------------------------------------------------------------------------|-----|---|-----|
| acaggggaaauaacgaacgauagcgggguaagaguaauuggucacugcagggccuuauuauuauuauuggggccugaaaaucucggguucgaauccugcccucgcccucc |     |   |     |
| .....agcgggUuagaguaauugg.....                                                                                  | 1   | 1 | seq |
| .....aAcgggguaagaguaauugg.....                                                                                 | 1   | 1 | seq |
| .....Ngcgggguaagaguaauugg.....                                                                                 | 2   | 1 | seq |
| .....agcgggguaagaguaauugg.....                                                                                 | 676 | 0 | seq |
| .....agcgggguaagGguaauugg.....                                                                                 | 5   | 1 | seq |
| .....agcgggguaagGuaauugg.....                                                                                  | 1   | 1 | seq |
| .....agcgggguaagaAuaauugg.....                                                                                 | 1   | 1 | seq |
| .....agUgggguaagaguaauugg.....                                                                                 | 1   | 1 | seq |
| .....agcgggguaagaguaauCgg.....                                                                                 | 2   | 1 | seq |
| .....agcgggguaagaguaGauugg.....                                                                                | 2   | 1 | seq |
| .....agcgggguaagaguaauuAg.....                                                                                 | 2   | 1 | seq |
| .....agcgggguaagagGaaugg.....                                                                                  | 1   | 1 | seq |
| .....agcgggguaagagCaaugg.....                                                                                  | 1   | 1 | seq |
| .....agcgUgguaagaguaauugg.....                                                                                 | 2   | 1 | seq |
| .....agcgggguaagaguaaCugg.....                                                                                 | 3   | 1 | seq |
| .....Ggcgggguaagaguaauugg.....                                                                                 | 4   | 1 | seq |
| .....agcgggguaagaguaauugU.....                                                                                 | 6   | 1 | seq |
| .....agcgggguaagaguaGuugg.....                                                                                 | 4   | 1 | seq |
| .....agcgggguaagaguaauugC.....                                                                                 | 5   | 1 | seq |
| .....agcggggGagaguaauugg.....                                                                                  | 3   | 1 | seq |
| .....Gcggggguaagaguaauugg.....                                                                                 | 1   | 1 | seq |
| .....agcgggguaagCguaauugg.....                                                                                 | 1   | 1 | seq |
| .....agcggggCagaguaauuggu.....                                                                                 | 3   | 1 | seq |
| .....Ngcgggguaagaguaauuggu.....                                                                                | 1   | 1 | seq |
| .....agcgggguaagaguaauuAgu.....                                                                                | 1   | 1 | seq |
| .....agcggggAagaguaauuggu.....                                                                                 | 1   | 1 | seq |
| .....agcgggguaagaguaaGuggu.....                                                                                | 1   | 1 | seq |
| .....agcgggguaagaguaauuggu.....                                                                                | 2   | 1 | seq |
| .....agcgggguaagaguaauugCu.....                                                                                | 1   | 1 | seq |
| .....agcgggguaagaAuaauuggu.....                                                                                | 1   | 1 | seq |
| .....agcgggguaagaguaauuggA.....                                                                                | 6   | 1 | seq |
| .....agcgggguaagaguaauuggG.....                                                                                | 14  | 1 | seq |
| .....agcUgguaagaguaauuggu.....                                                                                 | 1   | 1 | seq |
| .....agcggggGagaguaauuggu.....                                                                                 | 1   | 1 | seq |
| .....agcgggguaagaguaauCggu.....                                                                                | 1   | 1 | seq |
| .....agcgggguaagaguaauuUgu.....                                                                                | 1   | 1 | seq |
| .....agcgggguaagaguaauuggu.....                                                                                | 514 | 0 | seq |
| .....agcggUguagaguaauuggu.....                                                                                 | 1   | 1 | seq |
| .....agcgggguaagaUuaauuggu.....                                                                                | 1   | 1 | seq |
| .....agcgggguaagaguaauuggC.....                                                                                | 95  | 1 | seq |
| .....agcgggguaagaguaaCuggu.....                                                                                | 1   | 1 | seq |
| .....Ggcgggguaagaguaauuggu.....                                                                                | 2   | 1 | seq |
| .....agcgggguaagaguaauugguc.....                                                                               | 441 | 0 | seq |
| .....agcgggguaagaguaauugguA.....                                                                               | 7   | 1 | seq |
| .....Ngcgggguaagaguaauugguc.....                                                                               | 1   | 1 | seq |
| .....Ggcgggguaagaguaauugguc.....                                                                               | 1   | 1 | seq |
| .....agcgggguaagaguaGuugguc.....                                                                               | 2   | 1 | seq |
| .....agcgggguaagaguaauugguG.....                                                                               | 3   | 1 | seq |
| .....agcggggCagaguaauugguc.....                                                                                | 1   | 1 | seq |
| .....agcggggGagaguaauugguc.....                                                                                | 1   | 1 | seq |
| .....agcgggguaagGguaauugguc.....                                                                               | 1   | 1 | seq |
| .....agcgUgguaagaguaauugguc.....                                                                               | 1   | 1 | seq |
| .....agcgggguaagaguaauCgguc.....                                                                               | 1   | 1 | seq |
| .....agcgggguaagaguaauugguc.....                                                                               | 1   | 1 | seq |
| .....agcgggguaagaguaauuAguc.....                                                                               | 2   | 1 | seq |
| .....agcgggguaagaguaauuggCc.....                                                                               | 3   | 1 | seq |
| .....Ugcgggguaagaguaauugguc.....                                                                               | 2   | 1 | seq |
| .....agcgggguaagaguaUuugguc.....                                                                               | 1   | 1 | seq |
| .....agcgggguaagaguaaCugguc.....                                                                               | 2   | 1 | seq |
| .....agcggggAagaguaauugguc.....                                                                                | 2   | 1 | seq |
| .....agcAggguaagaguaauugguc.....                                                                               | 1   | 1 | seq |
| .....agcgggguaagaguaauAgguc.....                                                                               | 1   | 1 | seq |
| .....Gcggggguaagaguaauuggucg.....                                                                              | 1   | 1 | seq |
| .....agcgggguaagaguaauuggAcg.....                                                                              | 2   | 1 | seq |
| .....agcgggguaagagGaauggucg.....                                                                               | 2   | 1 | seq |
| .....agcgggguaagGguaauuggucg.....                                                                              | 6   | 1 | seq |
| .....agcgggguaagagCaauggucg.....                                                                               | 3   | 1 | seq |
| .....agUgggguaagaguaauuggucg.....                                                                              | 4   | 1 | seq |
| .....agcgggguaagaguaauuggucU.....                                                                              | 12  | 1 | seq |
| .....agcgggguaagaguaauAggucg.....                                                                              | 1   | 1 | seq |

## Mature

## Star

|                                                                                                                   |     |   |     |
|-------------------------------------------------------------------------------------------------------------------|-----|---|-----|
| acaggggaaauaacgaacgauagcggggguagaguaauugggucgacugcagggccuuauuauuauuauuggggccugaaaaucucggguucggaauccugcccucgcccucc |     |   |     |
| .....agcggggguagagAaaauuggucg.....                                                                                | 3   | 1 | seq |
| .....agcggggguagaguaGuuggucg.....                                                                                 | 2   | 1 | seq |
| .....agcgggAguagaguaauuggucg.....                                                                                 | 1   | 1 | seq |
| .....agcggggguagaguaauuggucC.....                                                                                 | 10  | 1 | seq |
| .....agcggggguagaguaauuggCcg.....                                                                                 | 10  | 1 | seq |
| .....agAgggggguagaguaauuggucg.....                                                                                | 1   | 1 | seq |
| .....agcggggguagagugauuggucg.....                                                                                 | 1   | 1 | seq |
| .....Ugcggggguagaguaauuggucg.....                                                                                 | 2   | 1 | seq |
| .....agcggggguagaguaauuggucg.....                                                                                 | 908 | 0 | seq |
| .....agcggggAagaguaauuggucg.....                                                                                  | 1   | 1 | seq |
| .....agcggggguagaguaauUgucg.....                                                                                  | 1   | 1 | seq |
| .....Ngcggggguagaguaauuggucg.....                                                                                 | 1   | 1 | seq |
| .....agcggggGagaguaauuggucg.....                                                                                  | 3   | 1 | seq |
| .....agcggggguGgaguaauuggucg.....                                                                                 | 1   | 1 | seq |
| .....agcggggguagaguaauUAgucg.....                                                                                 | 4   | 1 | seq |
| .....agcggggGagaguaauuggucg.....                                                                                  | 6   | 1 | seq |
| .....agcggggguagaguaauuggGcg.....                                                                                 | 3   | 1 | seq |
| .....agcggggguagaguaauuggguAg.....                                                                                | 2   | 1 | seq |
| .....agcgggAagaguaauuggucg.....                                                                                   | 1   | 1 | seq |
| .....Ggcggggguagaguaauuggucg.....                                                                                 | 4   | 1 | seq |
| .....agcggggguagaguaauuggCcg.....                                                                                 | 2   | 1 | seq |
| .....agcggggguagagAaaauuggucga.....                                                                               | 1   | 1 | seq |
| .....aAcggggguagaguaauuggucga.....                                                                                | 1   | 1 | seq |
| .....agAgggguagaguaauuggucga.....                                                                                 | 1   | 1 | seq |
| .....Ggcggggguagaguaauuggucga.....                                                                                | 1   | 1 | seq |
| .....agcgUggguagaguaauuggucga.....                                                                                | 1   | 1 | seq |
| .....agcggggguagaguaauuggucga.....                                                                                | 299 | 0 | seq |
| .....agcggggCagaguaauuggucga.....                                                                                 | 1   | 1 | seq |
| .....agcggggguagaguaauuggucgU.....                                                                                | 4   | 1 | seq |
| .....agcggggguagaguaauuggucgC.....                                                                                | 1   | 1 | seq |
| .....agcggggguagaguaauuggucgG.....                                                                                | 7   | 1 | seq |
| .....agcggggCagaguaauuggucgac.....                                                                                | 2   | 1 | seq |
| .....agcggggguagaguaauuggucgac.....                                                                               | 231 | 0 | seq |
| .....agcggggguagaguaauuggucgaG.....                                                                               | 3   | 1 | seq |
| .....agcUggguagaguaauuggucgac.....                                                                                | 1   | 1 | seq |
| .....agGggguagaguaauuggucgac.....                                                                                 | 1   | 1 | seq |
| .....agcggAguagaguaauuggucgac.....                                                                                | 1   | 1 | seq |
| .....agcgggguagaAuaauuggucgac.....                                                                                | 2   | 1 | seq |
| .....agcggggguagaguaauuggucgGc.....                                                                               | 1   | 1 | seq |
| .....Ggcggggguagaguaauuggucgac.....                                                                               | 2   | 1 | seq |
| .....agcggggguagagugauuggucgac.....                                                                               | 2   | 1 | seq |
| .....agcggggguGgaguaauuggucgac.....                                                                               | 1   | 1 | seq |
| .....agcggggguagaguaauuggucgaU.....                                                                               | 13  | 1 | seq |
| .....agcggggguagaguaauuggucgaA.....                                                                               | 1   | 1 | seq |
| .....agcgggCuagaguaauuggucgac.....                                                                                | 1   | 1 | seq |
| .....agcggggguagaguaaCuggucgacu.....                                                                              | 2   | 1 | seq |
| .....agcggggCagaguaauuggucgacu.....                                                                               | 6   | 1 | seq |
| .....agcggggguagaguaauuggGcgacu.....                                                                              | 1   | 1 | seq |
| .....aNcggggguagaguaauuggucgacu.....                                                                              | 1   | 1 | seq |
| .....agcggggguagaguaaAuggucgacu.....                                                                              | 1   | 1 | seq |
| .....agcggggguUgaguaauuggucgacu.....                                                                              | 1   | 1 | seq |
| .....agcggggguagaguaauuggucgacA.....                                                                              | 67  | 1 | seq |
| .....agcggggguagagAaauggucgacu.....                                                                               | 1   | 1 | seq |
| .....agcggggguagaguaauuggucgacC.....                                                                              | 329 | 1 | seq |
| .....agcggggguagagCaauggucgacu.....                                                                               | 4   | 1 | seq |
| .....agcggggguagaguaCuuggucgacu.....                                                                              | 1   | 1 | seq |
| .....agcggggguGgaguaauuggucgacu.....                                                                              | 2   | 1 | seq |
| .....agcggggguagaguaauuggucgaGu.....                                                                              | 1   | 1 | seq |
| .....agcggggguagaguaUuuggucgacu.....                                                                              | 1   | 1 | seq |
| .....agcggggguagUguuaauuggucgacu.....                                                                             | 1   | 1 | seq |
| .....agcggggguagaguaauugCucgacu.....                                                                              | 1   | 1 | seq |
| .....agUggggguagaguaauuggucgacu.....                                                                              | 1   | 1 | seq |
| .....agcggggguagaguaGuuggucgacu.....                                                                              | 3   | 1 | seq |
| .....agcggggguagagugauuggucgacu.....                                                                              | 3   | 1 | seq |
| .....agcggggguagaguaauugguAgacu.....                                                                              | 1   | 1 | seq |
| .....agcAgggguagaguaauuggucgacu.....                                                                              | 3   | 1 | seq |
| .....agcggggguagaguaauuggucgacG.....                                                                              | 62  | 1 | seq |
| .....Ugcggggguagaguaauuggucgacu.....                                                                              | 1   | 1 | seq |
| .....agcggggguagaguaauuggAcgacu.....                                                                              | 2   | 1 | seq |
| .....Ngcggggguagaguaauuggucgacu.....                                                                              | 5   | 1 | seq |

## Mature

## Star

|                                                                                                         |      |   |     |
|---------------------------------------------------------------------------------------------------------|------|---|-----|
| acagggaauaacgaacgauagcgggguagaguaauuggucgacugcagccuuauuauuauuagggggccugaaaaucugggguucgaauccugcccucgcucc |      |   |     |
| .....agcgggguagGguauuuggucgacu.....                                                                     | 1    | 1 | seq |
| .....agcgggguagGguauuuggucgacu.....                                                                     | 8    | 1 | seq |
| .....agcggggGagaguaauuggucgacu.....                                                                     | 2    | 1 | seq |
| .....aUcgggguagaguaauuggucgacu.....                                                                     | 1    | 1 | seq |
| .....agcgggguagaguaauuAgucgacu.....                                                                     | 2    | 1 | seq |
| .....agcggggAagaguaauuggucgacu.....                                                                     | 1    | 1 | seq |
| .....agcgggguagaguaauuggucgGcu.....                                                                     | 11   | 1 | seq |
| .....agcgAgguagaguaauuggucgacu.....                                                                     | 1    | 1 | seq |
| .....agcgggguagaguaauuggCcgaacu.....                                                                    | 4    | 1 | seq |
| .....aAcgggguagaguaauuggucgacu.....                                                                     | 1    | 1 | seq |
| .....agcgggguagagGaauggucgacu.....                                                                      | 1    | 1 | seq |
| .....agcgggguagaguaauCggucgacu.....                                                                     | 7    | 1 | seq |
| .....agcgggguagaguaauuggucgacu.....                                                                     | 1853 | 0 | seq |
| .....Ggcgggguagaguaauuggucgacu.....                                                                     | 8    | 1 | seq |
| .....agcGgguagaguaauuggucgacu.....                                                                      | 1    | 1 | seq |
| .....agcgggguagaguaauuggucgaGuc.....                                                                    | 1    | 1 | seq |
| .....agcgggguagaguaauuggucgacuU.....                                                                    | 29   | 1 | seq |
| .....agcgggguagaguaauuggucgacuc.....                                                                    | 536  | 0 | seq |
| .....agcgggguagagCaauggucgacuc.....                                                                     | 1    | 1 | seq |
| .....agcgggguagagAuaauuggucgacuc.....                                                                   | 1    | 1 | seq |
| .....agcgggguGagaguaauuggucgacuc.....                                                                   | 1    | 1 | seq |
| .....agcgggguagaguaauuggCcgaacu.....                                                                    | 3    | 1 | seq |
| .....agcgggguagaguaaCuggucgacuc.....                                                                    | 2    | 1 | seq |
| .....agcgggguagaguaauuggucUacu.....                                                                     | 1    | 1 | seq |
| .....agAgggguagaguaauuggucgacuc.....                                                                    | 1    | 1 | seq |
| .....agUgggguagaguaauuggucgacuc.....                                                                    | 1    | 1 | seq |
| .....aAcgggguagaguaauuggucgacuc.....                                                                    | 1    | 1 | seq |
| .....Ggcgggguagaguaauuggucgacuc.....                                                                    | 1    | 1 | seq |
| .....agcgggguagaguaGuuggucgacuc.....                                                                    | 2    | 1 | seq |
| .....agcgggguagaguaauugAucgacuc.....                                                                    | 1    | 1 | seq |
| .....agcggggGagaguaauuggucgacuc.....                                                                    | 1    | 1 | seq |
| .....agcgggguagGguauuuggucgacuc.....                                                                    | 1    | 1 | seq |
| .....agcgggguagaguaauuggucgacuA.....                                                                    | 11   | 1 | seq |
| .....agcAgggguagaguaauuggucgacuc.....                                                                   | 2    | 1 | seq |
| .....agcgggguagagGuauuggucgacuc.....                                                                    | 3    | 1 | seq |
| .....agcgggguagaguaauuggucgacCc.....                                                                    | 7    | 1 | seq |
| .....agcggggCagaguaauuggucgacuc.....                                                                    | 1    | 1 | seq |
| .....agcggggUgaguaauuggucgacuc.....                                                                     | 1    | 1 | seq |
| .....agcgggguagaguaauuggucgacuA.....                                                                    | 7    | 1 | seq |
| .....agcgggguagaguaauuggucgacucAuc.....                                                                 | 1    | 1 | seq |
| .....agcgggguagaguaauuggucgacucguc.....                                                                 | 2    | 0 | seq |
| .....agcgggguagaguaauuggucgacucUuc.....                                                                 | 1    | 1 | seq |
| .....agcgggguagaguaauuggucgacucCca.....                                                                 | 1    | 1 | seq |
| .....agcgggguagaguaauuggucgacucAucagg.....                                                              | 2    | 1 | seq |
| .....agcgggguagaguaauuggucgacucgucagg.....                                                              | 1    | 0 | seq |
| .....agcgggguagaguaauuggucgacucUucagg.....                                                              | 3    | 1 | seq |
| .....agcgggguagaguaauuggucgacucCucagg.....                                                              | 1    | 1 | seq |
| .....agcgggguagaguaauuggucgacucgucagC.....                                                              | 1    | 1 | seq |
| .....agcgggguagGguauuuggucgacucgucaggc.....                                                             | 1    | 1 | seq |
| .....agcgggguagaguaauuggucgacucgucaggc.....                                                             | 4    | 0 | seq |
| .....agcgggguagaguaauuggucgacucCucaggc.....                                                             | 1    | 1 | seq |
| .....agcgggguagaguaauuggucgacucgucaggU.....                                                             | 1    | 1 | seq |
| .....agcgggguagagGuauuggucgacucgucaggc.....                                                             | 1    | 1 | seq |
| .....agcgggguagaguaauuggucgacucUucaggc.....                                                             | 1    | 1 | seq |
| .....agcgggguagaguaauuggucgacucCucaggcc.....                                                            | 6    | 1 | seq |
| .....agcgggguagaguaauuggucgacucAucaggcc.....                                                            | 2    | 1 | seq |
| .....agcgggguagaguaauuggucgacucUucaggcc.....                                                            | 11   | 1 | seq |
| .....agcgggguagaguaauuggucgacucgucaggcA.....                                                            | 3    | 1 | seq |
| .....agcgggguagaguaauuggucgacucgucaggcc.....                                                            | 19   | 0 | seq |
| .....agcgggguagaguaauuggucgacucgucaggcU.....                                                            | 8    | 1 | seq |
| .....agcgggguagaguaauuggucgacucgucaggccu.....                                                           | 2    | 0 | seq |
| .....gcgggguagaguaauug.....                                                                             | 109  | 0 | seq |
| .....gcgggguagaguaauCg.....                                                                             | 3    | 1 | seq |
| .....gcgggguagaguaauuA.....                                                                             | 3    | 1 | seq |
| .....gcggggAagaguaauug.....                                                                             | 2    | 1 | seq |
| .....gcAaggguagaguaauug.....                                                                            | 1    | 1 | seq |
| .....gcggggCagaguaauug.....                                                                             | 1    | 1 | seq |
| .....gcgggguagagGuauug.....                                                                             | 2    | 1 | seq |
| .....Ccgggguagaguaauug.....                                                                             | 1    | 1 | seq |
| .....Acgggguagaguaauug.....                                                                             | 1    | 1 | seq |



## Mature

## Star

|                                                                                                            |     |   |     |
|------------------------------------------------------------------------------------------------------------|-----|---|-----|
| acagggaaauaacgaacgauagcgggguagaguaauuggucacugcagccuuauuauuauuauuggggccugaaaaucugggguucgaauccugcccucgcccucc |     |   |     |
| .gcgggguaagaguaauugC.                                                                                      | 1   | 1 | seq |
| .gcgggguaUaguaauugg.                                                                                       | 1   | 1 | seq |
| .gUgggguaagaguaauugg.                                                                                      | 1   | 1 | seq |
| .gcgggguaagaguaauugA.                                                                                      | 11  | 1 | seq |
| .gcgggguaagaguaauugU.                                                                                      | 2   | 1 | seq |
| .gcggAguaagaguaauugg.                                                                                      | 1   | 1 | seq |
| .gcgggguaagGguauuugg.                                                                                      | 1   | 1 | seq |
| .gcgggguaagaguaauuugg.                                                                                     | 133 | 0 | seq |
| .gcgggguaagaguaauuCG.                                                                                      | 1   | 1 | seq |
| .gcgggguaagaguaauuuggG.                                                                                    | 1   | 1 | seq |
| .gcAggguagaguaauuuggu.                                                                                     | 1   | 1 | seq |
| .gcgggguaagGguauuuggu.                                                                                     | 1   | 1 | seq |
| .gcgggguaagaguaauuuggA.                                                                                    | 2   | 1 | seq |
| .gcgggguaagaguaauuuggu.                                                                                    | 110 | 0 | seq |
| .gcgggguaagaguGauuuggu.                                                                                    | 1   | 1 | seq |
| .gcgggguaagaguaauuuggC.                                                                                    | 12  | 1 | seq |
| .Acgggguaagaguaauuugguc.                                                                                   | 1   | 1 | seq |
| .gcgggguaagGguauuugguc.                                                                                    | 1   | 1 | seq |
| .gcgggguaagaguaauuugguc.                                                                                   | 84  | 0 | seq |
| .gcgggguaagaguaauuugguA.                                                                                   | 3   | 1 | seq |
| .gcggggCagaguaauuugguc.                                                                                    | 1   | 1 | seq |
| .gcgggguaagaguaaCugguc.                                                                                    | 1   | 1 | seq |
| .gcgggguaagaguaauUgucg.                                                                                    | 1   | 1 | seq |
| .gUgggguaagaguaauuuggucg.                                                                                  | 1   | 1 | seq |
| .gcgggguaagaguaauuuggucg.                                                                                  | 251 | 0 | seq |
| .gcgggguaagGguauuuggucg.                                                                                   | 1   | 1 | seq |
| .gcgggguaagaguaauuuggucg.                                                                                  | 1   | 1 | seq |
| .gcgggguaagaguaauuuggucU.                                                                                  | 5   | 1 | seq |
| .gcgggguaagagAauuuggucg.                                                                                   | 1   | 1 | seq |
| .gcgggguaagaguaaCuggucg.                                                                                   | 1   | 1 | seq |
| .gcggggCagaguaauuuggucg.                                                                                   | 1   | 1 | seq |
| .gcgggCuagaguaauuuggucg.                                                                                   | 1   | 1 | seq |
| .gcgggguaagaguaaCggucg.                                                                                    | 1   | 1 | seq |
| .gcgggguaagaguaaGuggucg.                                                                                   | 1   | 1 | seq |
| .gcAggguagaguaauuuggucg.                                                                                   | 1   | 1 | seq |
| .gcggggGagaguaauuuggucg.                                                                                   | 1   | 1 | seq |
| .gcgggguaagaguaauuAGucg.                                                                                   | 1   | 1 | seq |
| .gcgggguaagaguaauuuggCcg.                                                                                  | 1   | 1 | seq |
| .gcgggguaagaguaUuuggucga.                                                                                  | 1   | 1 | seq |
| .gcgggguaagaguaauuuggucgG.                                                                                 | 1   | 1 | seq |
| .gcgggguaagaguaauuuggucga.                                                                                 | 98  | 0 | seq |
| .Ncgggguaagaguaauuuggucga.                                                                                 | 1   | 1 | seq |
| .Ucgggguaagaguaauuuggucga.                                                                                 | 2   | 1 | seq |
| .gcgggguaagagCaauuggucga.                                                                                  | 1   | 1 | seq |
| .gcgggguaagaguaauuuggucga.                                                                                 | 1   | 1 | seq |
| .gcggggCagaguaauuuggucga.                                                                                  | 1   | 1 | seq |
| .gcgggguaagaguaauuuggucgaU.                                                                                | 8   | 1 | seq |
| .gcgggguaagaguaaCggucgac.                                                                                  | 1   | 1 | seq |
| .gcgggguaagagCaauuggucgac.                                                                                 | 1   | 1 | seq |
| .gcgggguaagaguaauuuggucgaA.                                                                                | 1   | 1 | seq |
| .gcgggguaagaguaauuuggucgac.                                                                                | 48  | 0 | seq |
| .gcgggguaGgaguaauuuggucgacu.                                                                               | 1   | 1 | seq |
| .gcgggguaagaguaauuuggucgacu.                                                                               | 234 | 0 | seq |
| .gcgggguaagGguauuuggucgacu.                                                                                | 1   | 1 | seq |
| .gcgggguaagaguaauuuggucgCcu.                                                                               | 1   | 1 | seq |
| .gcggggAagaguaauuuggucgacu.                                                                                | 1   | 1 | seq |
| .gcgggguaagaAuaauuuggucgacu.                                                                               | 1   | 1 | seq |
| .gcgggguaagaguaauuuggucgacG.                                                                               | 7   | 1 | seq |
| .gUgggguaagaguaauuuggucgacu.                                                                               | 1   | 1 | seq |
| .gcgggguaagaguaauuuggucgaUu.                                                                               | 2   | 1 | seq |
| .gcgggguaagaguaauuuggucgacA.                                                                               | 10  | 1 | seq |
| .Ccgggguaagaguaauuuggucgacu.                                                                               | 1   | 1 | seq |
| .gcgggguaagaguaauuuggucgacC.                                                                               | 50  | 1 | seq |
| .gcgggguaagaguaaCggucgacu.                                                                                 | 1   | 1 | seq |
| .gcgAgguagaguaauuuggucgacu.                                                                                | 1   | 1 | seq |
| .gcAggguagaguaauuuggucgacu.                                                                                | 1   | 1 | seq |
| .gcgggguaagaguaauuuggAcgacu.                                                                               | 1   | 1 | seq |
| .gcgggguaagaguGauuuggucgacuc.                                                                              | 1   | 1 | seq |
| .gcgggguaagaguaauuuggucgacuA.                                                                              | 2   | 1 | seq |
| .gcgggguaagaguaauuuggucgacuU.                                                                              | 2   | 1 | seq |

## Mature

## Star

|                                                                                                                |    |   |     |
|----------------------------------------------------------------------------------------------------------------|----|---|-----|
| acagggaaauaacgaacgauagcgggguagaguaauuggucgacucgucagggccuauuauuauuauuggggccugaaaaucucggguucgaauccugcccucgcccucc |    |   |     |
| .....gcgggguaagGguaauuggucgacuc.....                                                                           | 1  | 1 | seq |
| .....gcgggguaagaguaauuggucgacuc.....                                                                           | 43 | 0 | seq |
| .....gcgggguaagaguaauuggucgacucAuc.....                                                                        | 1  | 1 | seq |
| .....gcgggguaagaguaauuggucgacucUucagg.....                                                                     | 1  | 1 | seq |
| .....gcgggguaagaguaauuggucgacucAucaggcc.....                                                                   | 1  | 1 | seq |
| .....gcgggguaagaguaauuggucgacucCucaggcc.....                                                                   | 7  | 1 | seq |
| .....gcgggguaagaguaauuggucgacucUucaggcc.....                                                                   | 5  | 1 | seq |
| .....gcgggguaagaguaauuggucgacucgucaggcc.....                                                                   | 4  | 0 | seq |
| .....cgggguagaguaauugg.....                                                                                    | 1  | 1 | seq |
| .....cgggguagaguaauugg.....                                                                                    | 54 | 0 | seq |
| .....cgggguagaguaauugA.....                                                                                    | 3  | 1 | seq |
| .....Gggguagaguaauugg.....                                                                                     | 1  | 1 | seq |
| .....cgggguagaguaauuggC.....                                                                                   | 7  | 1 | seq |
| .....cgggguagaguaauugggu.....                                                                                  | 35 | 0 | seq |
| .....cgggguagaguaauuggG.....                                                                                   | 1  | 1 | seq |
| .....cgggguagaguaauugguc.....                                                                                  | 37 | 0 | seq |
| .....cgggguagGguaauugguc.....                                                                                  | 2  | 1 | seq |
| .....cgggguagaguaauCgguc.....                                                                                  | 1  | 1 | seq |
| .....cgggguagaguaauuggucU.....                                                                                 | 1  | 1 | seq |
| .....cgggguagaguaauuggguG.....                                                                                 | 1  | 1 | seq |
| .....cgggguagaguaauuggucg.....                                                                                 | 92 | 0 | seq |
| .....cgggguagaguaauuAgucg.....                                                                                 | 2  | 1 | seq |
| .....cAggguaagaguaauuggucg.....                                                                                | 1  | 1 | seq |
| .....cgggguagaguaauuggucC.....                                                                                 | 1  | 1 | seq |
| .....cgggguagGguaauuggucg.....                                                                                 | 1  | 1 | seq |
| .....Uggguagaguaauuggucg.....                                                                                  | 1  | 1 | seq |
| .....cgggguagaguaauuggucgU.....                                                                                | 1  | 1 | seq |
| .....cgggguagaguaGuuggucga.....                                                                                | 1  | 1 | seq |
| .....cgggguagaguaauuggucga.....                                                                                | 26 | 0 | seq |
| .....cgGAguaagaguaauuggucgac.....                                                                              | 1  | 1 | seq |
| .....cgggguagaguaauuggucgac.....                                                                               | 19 | 0 | seq |
| .....cgggguagaguaGuuggucgac.....                                                                               | 1  | 1 | seq |
| .....cgggguagaguaauuggucgacA.....                                                                              | 1  | 1 | seq |
| .....cgggguagaguaauuggucgacu.....                                                                              | 39 | 0 | seq |
| .....cgggguagaguaauuggucgacG.....                                                                              | 1  | 1 | seq |
| .....cgggguagaguaauuggucgacC.....                                                                              | 6  | 1 | seq |
| .....cgggguagaguaauuggucgacuc.....                                                                             | 7  | 0 | seq |
| .....cgggguagaguaauuggucgacucAucaggcc.....                                                                     | 1  | 1 | seq |
| .....cgggguagaguaauuggucgacucUucaggcc.....                                                                     | 1  | 1 | seq |
| .....cgggguagaguaauuggucgacucgucaggcc.....                                                                     | 1  | 0 | seq |
| .....gggguaagaguaauuggC.....                                                                                   | 1  | 1 | seq |
| .....gggguaagaguaauugggu.....                                                                                  | 1  | 0 | seq |
| .....gggguaagaguaauugguc.....                                                                                  | 4  | 0 | seq |
| .....gggguaagaguaauuggucg.....                                                                                 | 7  | 0 | seq |
| .....gggguaagaguaauuggucga.....                                                                                | 1  | 0 | seq |
| .....gggguaagaguaauuggucgac.....                                                                               | 5  | 0 | seq |
| .....Cggguagaguaauuggucgacu.....                                                                               | 1  | 1 | seq |
| .....ggguagaguaauuggucgacu.....                                                                                | 1  | 0 | seq |
| .....ggguagaguaauugguc.....                                                                                    | 4  | 0 | seq |
| .....ggguagaguaauuggguA.....                                                                                   | 1  | 1 | seq |
| .....ggguagaguaauuggCc.....                                                                                    | 1  | 1 | seq |
| .....ggguagaguaauuggucg.....                                                                                   | 4  | 0 | seq |
| .....ggguagaguaauuggucga.....                                                                                  | 5  | 0 | seq |
| .....ggguagaguaauuggucgU.....                                                                                  | 1  | 1 | seq |
| .....ggguagaguaauuggucgac.....                                                                                 | 1  | 0 | seq |
| .....ggguagaguaauuggucgaU.....                                                                                 | 1  | 1 | seq |
| .....ggguagaguaauuggucgacu.....                                                                                | 2  | 0 | seq |
| .....gguaagaguaauuggucg.....                                                                                   | 1  | 0 | seq |
| .....gguaagaguaauuggucga.....                                                                                  | 3  | 0 | seq |
| .....gguaagaguaauuggucgacuc.....                                                                               | 1  | 0 | seq |
| .....guagaguaauuggucga.....                                                                                    | 1  | 0 | seq |
| .....guagaguaauuggucgacC.....                                                                                  | 1  | 1 | seq |
| .....guagaguaauuggucgacu.....                                                                                  | 2  | 0 | seq |
| .....guagaguaauuggucgacG.....                                                                                  | 1  | 1 | seq |
| .....uagaguaauuggucgacC.....                                                                                   | 1  | 1 | seq |
| .....uagaguaauuggucgacu.....                                                                                   | 7  | 0 | seq |
| .....uagaguaauuggucgacG.....                                                                                   | 1  | 1 | seq |
| .....agaguaauuggucgacu.....                                                                                    | 3  | 0 | seq |
| .....agaguaauuggucgacucgucagg.....                                                                             | 1  | 0 | seq |
| .....aguaauuggucgacucU.....                                                                                    | 1  | 1 | seq |

## Mature

## Star

acagggaauaacgaacgauagcgggguagaguaauuggucgacucgucaggccuuauuuauuuauuggggccugaaaaucucggguucgaauccugcccucgcucc

|                                    |    |   |     |
|------------------------------------|----|---|-----|
| .....uauuggucgacucUuc.....         | 1  | 1 | seq |
| .....uauuggucgacucgucagg.....      | 1  | 0 | seq |
| .....uauuggucgacucAucaggccu.....   | 1  | 1 | seq |
| .....aauggucgacucUucag.....        | 1  | 1 | seq |
| .....aauggucgacucgucagg.....       | 1  | 0 | seq |
| .....aauggucgacucUucaggc.....      | 1  | 1 | seq |
| .....aauggucgacucgucaggcU.....     | 1  | 1 | seq |
| .....auuggucgacucUucaggc.....      | 2  | 1 | seq |
| .....auuggucgacucgucaggcc.....     | 1  | 0 | seq |
| .....auuggucgacucgucaggccA.....    | 1  | 1 | seq |
| .....uuggucgacucUucagg.....        | 3  | 1 | seq |
| .....uuggucgacucAucagg.....        | 1  | 1 | seq |
| .....uuggucgacucgucagg.....        | 1  | 0 | seq |
| .....uuggucgacucUucaggc.....       | 3  | 1 | seq |
| .....uuggucgacucCucaggc.....       | 1  | 1 | seq |
| .....uuggucgacucgucaggc.....       | 1  | 0 | seq |
| .....uuggucgacucAucaggc.....       | 1  | 1 | seq |
| .....uuggucgacucgucaggccu.....     | 2  | 0 | seq |
| .....uggucgacucAucaggc.....        | 1  | 1 | seq |
| .....uggucgacucUucaggc.....        | 1  | 1 | seq |
| .....uggucgacucgucaggccu.....      | 1  | 0 | seq |
| .....uggucgacucgucaggccA.....      | 1  | 1 | seq |
| .....gguucgaaucuccgccCcg.....      | 2  | 1 | seq |
| .....gguucgaaucuccgccCcgcc.....    | 3  | 1 | seq |
| .....gguucgaaucuccgccCcgccu.....   | 4  | 1 | seq |
| .....gguucgaaucuccgccCcgccuc.....  | 12 | 1 | seq |
| .....gguucgaaucuccgccCcgccucc..... | 5  | 1 | seq |
| .....guucgaaucuccgccCcgcc.....     | 6  | 1 | seq |
| .....guucgaaucuccgccCcgccu.....    | 9  | 1 | seq |
| .....guucgaaucuccgccCcgccuc.....   | 3  | 1 | seq |
| .....guucgaaucuccgccCcgccucc.....  | 3  | 1 | seq |
| .....uucgaaucuccgccCcg.....        | 1  | 1 | seq |
| .....uucgaaucuccgccCcgcc.....      | 1  | 1 | seq |
| .....uucgaaucuccgccCcgcc.....      | 4  | 1 | seq |
| .....uucgaaucuccgccCcgccu.....     | 4  | 1 | seq |
| .....uucgaaucuccgccCcgccuc.....    | 6  | 1 | seq |
| .....uucgaaucuccgccCcgccucc.....   | 1  | 1 | seq |
| .....ucgaaucuccgccCcgcc.....       | 5  | 1 | seq |
| .....ucgaaucuccgccCcgcc.....       | 17 | 1 | seq |
| .....ucgaaucuccgccCcgccu.....      | 14 | 1 | seq |
| .....ucgaaucuccgccCcgccuc.....     | 9  | 1 | seq |
| .....ucgaaucuccgccCcgccucc.....    | 6  | 1 | seq |
| .....cgaaucuccgccCcgcc.....        | 6  | 1 | seq |
| .....cgaaucuccgccCcgccu.....       | 7  | 1 | seq |
| .....cgaaucuccgccCcgccuc.....      | 5  | 1 | seq |
| .....cgaaucuccgccCcgccucc.....     | 6  | 1 | seq |
| .....gaaucuccgccCcgccu.....        | 3  | 1 | seq |
| .....gaaucuccgccCcgccuc.....       | 3  | 1 | seq |
| .....gaaucuccgccCcgccucc.....      | 3  | 1 | seq |
| .....aaucuccgccCcgccucc.....       | 27 | 1 | seq |
| .....aucuccgccCcgccucc.....        | 57 | 1 | seq |



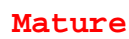

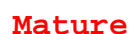[illegible]

Provisional ID : MA\_13826\_5055  
 Score total : 1.1  
 Score for star read(s) : -1.3  
 Score for read counts : -1.3  
 Score for mfe : 2.2  
 Score for randfold : 1.6  
 Score for cons. seed :  
 Total read count : 9  
 Mature read count : 9  
 Loop read count : 0  
 Star read count : 0

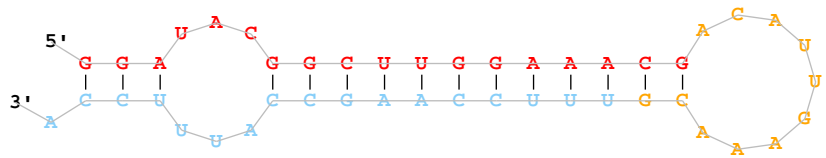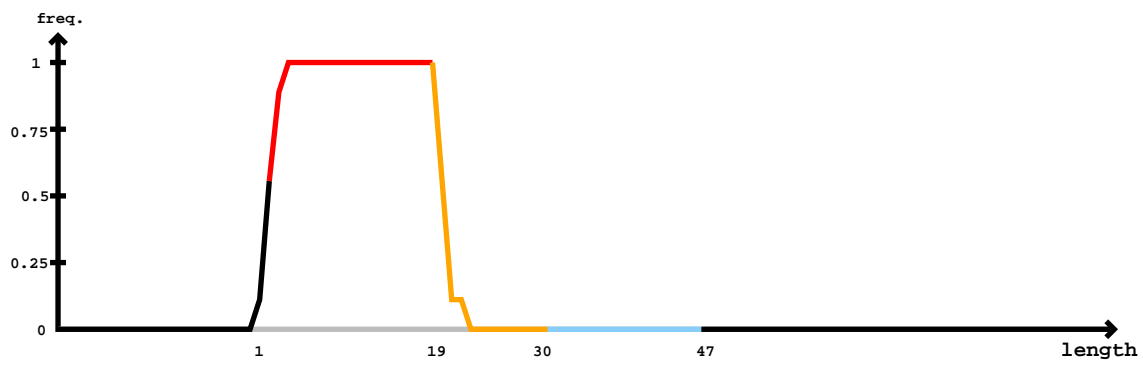

| Mature |                                                                                                                   | Star  |     |  |        |  |
|--------|-------------------------------------------------------------------------------------------------------------------|-------|-----|--|--------|--|
| 5'     | uucggaacuaaaauggaggggaucggcuuggaaacgacauugaaacguuuccaagccauuuccaccgauucaguuucugaaaauagggauggcguauc(cccccuu        | -3'   | exp |  |        |  |
|        | ((((((((((((((((((((((((((((((((((((((((((((((((((((((((((((((((((((((((((((((((((((((((((((((((((((((((((((((((( | reads | mm  |  | sample |  |
|        | .....gggauacggcuuggaaacgGca.....                                                                                  | 1     | 1   |  | seq    |  |
|        | .....gggauacggcuuggaaacg.....                                                                                     | 4     | 0   |  | seq    |  |
|        | .....gauacggcuuggaaacg.....                                                                                       | 1     | 0   |  | seq    |  |
|        | .....gauacgUcuuggaaacga.....                                                                                      | 1     | 1   |  | seq    |  |
|        | .....gauacggcuuggaaacgG.....                                                                                      | 1     | 1   |  | seq    |  |
|        | .....auacggcuuggaaacgG.....                                                                                       | 1     | 1   |  | seq    |  |

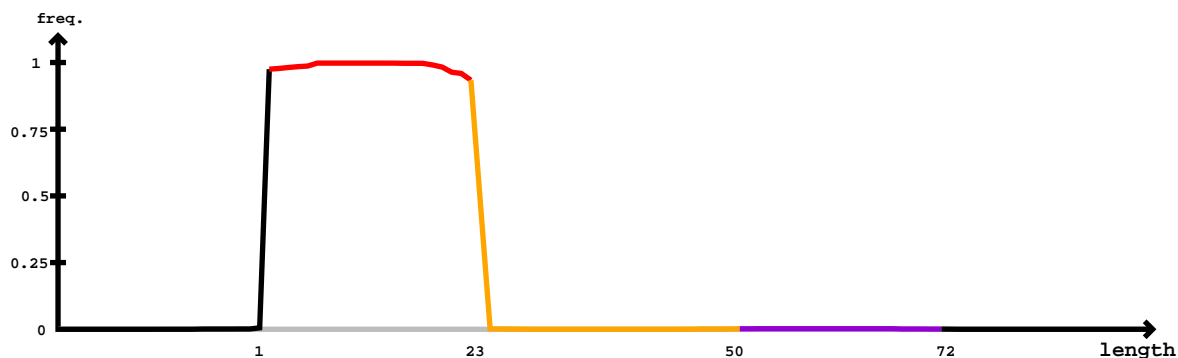

Star

[illegible]



## Mature

## Star

agagguuuuaggaggugaucuucacaucugggccacgaugguuuuauuuuucucuguuuuuuuaucauaaa

|                                   |       |   |     |
|-----------------------------------|-------|---|-----|
| .....ucacaucuggCccacgau.....      | 4     | 1 | seq |
| .....ucacaucugggccacgau.....      | 83    | 0 | seq |
| .....ucacaucugggccacgaA.....      | 1     | 1 | seq |
| .....ucacaucAgggccacgau.....      | 1     | 1 | seq |
| .....ucacaucugggccacgaG.....      | 6     | 1 | seq |
| .....ucacaucugggccacgaC.....      | 12    | 1 | seq |
| .....ucacaCugggccacgau.....       | 2     | 1 | seq |
| .....ucacGucugggccacgau.....      | 188   | 1 | seq |
| .....Ccacaucugggccacgaug.....     | 1     | 1 | seq |
| .....ucaUaucugggccacgaug.....     | 1     | 1 | seq |
| .....ucacaucuggUccacgaug.....     | 1     | 1 | seq |
| .....ucacaucugggccacgaCg.....     | 1     | 1 | seq |
| .....ucacaucugggccacgauA.....     | 14    | 1 | seq |
| .....ucacaucugggccacgCug.....     | 1     | 1 | seq |
| .....ucacaucugggccacgaug.....     | 81    | 0 | seq |
| .....ucacaucugggccAacgaug.....    | 1     | 1 | seq |
| .....ucacaucuggCccacgaug.....     | 6     | 1 | seq |
| .....ucacaucugggccacgauC.....     | 21    | 1 | seq |
| .....ucacaucAgggccacgaug.....     | 1     | 1 | seq |
| .....ucacGucugggccacgaug.....     | 536   | 1 | seq |
| .....ucacaucugggccUcgaug.....     | 1     | 1 | seq |
| .....ucacaucugggccacgauU.....     | 30    | 1 | seq |
| .....ucacaucCgggccacgaug.....     | 3     | 1 | seq |
| .....ucacGucugggccacgaugg.....    | 121   | 1 | seq |
| .....ucacaucugggccacgauAg.....    | 1     | 1 | seq |
| .....ucacaucugggccacgaugU.....    | 1     | 1 | seq |
| .....ucacaucugggccacgaugg.....    | 24    | 0 | seq |
| .....ucacaucugggccacgauCg.....    | 2     | 1 | seq |
| .....ucacaucuggCccacgaugg.....    | 1     | 1 | seq |
| .....ucacaucugggccacgaugC.....    | 1     | 1 | seq |
| .....ucacaucAgggccacgauggu.....   | 1     | 1 | seq |
| .....ucacGucugggccacgauggu.....   | 514   | 1 | seq |
| .....ucacaCugggccacgauggu.....    | 1     | 1 | seq |
| .....ucacaucugggccacgauggA.....   | 3     | 1 | seq |
| .....ucacaucuggAccacgauggu.....   | 1     | 1 | seq |
| .....ucacaucugggccacgauggC.....   | 32    | 1 | seq |
| .....ucacaucugggccacgGuggu.....   | 1     | 1 | seq |
| .....ucacaucuggCccacgauggu.....   | 7     | 1 | seq |
| .....ucacauUugggccacgauggu.....   | 1     | 1 | seq |
| .....ucacaucugggccacgauggG.....   | 8     | 1 | seq |
| .....ucacaucugggccacgaugCu.....   | 1     | 1 | seq |
| .....ucacaucugggccGcgauggu.....   | 1     | 1 | seq |
| .....ucacaucugggccaUgauggu.....   | 1     | 1 | seq |
| .....ucacaucugggccacgauggu.....   | 172   | 0 | seq |
| .....ucacaucugggccacGgaugguu..... | 2     | 1 | seq |
| .....ucacaucugggccacgauggCu.....  | 9     | 1 | seq |
| .....ucacaucugggcUacgaugguu.....  | 1     | 1 | seq |
| .....ucacaucugggccacgauggAu.....  | 2     | 1 | seq |
| .....Acacaucugggccacgaugguu.....  | 4     | 1 | seq |
| .....ucacGucugggccacgaugguu.....  | 31318 | 1 | seq |
| .....ucacaucCgggccacgaugguu.....  | 3     | 1 | seq |
| .....ucacaucugggccacgaugUuu.....  | 1     | 1 | seq |
| .....ucacaucugggccacgaugguA.....  | 26    | 1 | seq |
| .....ucacaucugggccacgaugguG.....  | 23    | 1 | seq |
| .....ucacaucugggccacgaugguC.....  | 285   | 1 | seq |
| .....Ccacaucugggccacgaugguu.....  | 4     | 1 | seq |
| .....Ncacaucugggccacgaugguu.....  | 6     | 1 | seq |
| .....ucacaucugggccacgauggGu.....  | 7     | 1 | seq |
| .....ucacaucuggUccacgaugguu.....  | 1     | 1 | seq |
| .....ucacaucugggccacUaugguu.....  | 2     | 1 | seq |
| .....ucacaucugggccGcgaugguu.....  | 6     | 1 | seq |
| .....ucacaCugggccacgaugguu.....   | 3     | 1 | seq |
| .....ucacUucugggccacgaugguu.....  | 1     | 1 | seq |
| .....ucacaucuAgggccacgaugguu..... | 1     | 1 | seq |
| .....ucacaucugCgccacgaugguu.....  | 2     | 1 | seq |
| .....ucacaucAgggccacgaugguu.....  | 7     | 1 | seq |
| .....ucacaucuggAccacgaugguu.....  | 2     | 1 | seq |
| .....Gcacaucugggccacgaugguu.....  | 2     | 1 | seq |
| .....ucacaucugggccacgGugguu.....  | 8     | 1 | seq |
| .....ucGcaucugggccacgaugguu.....  | 7     | 1 | seq |

## Mature

## Star

agagguuuuaggaggugaucuuucacaucuggggccacgaugguuuuauuuuucucugguuuuuuuuaucauaaa

|                                       |      |   |     |
|---------------------------------------|------|---|-----|
| .....ucacaucuggggccacgaCgguu.....     | 3    | 1 | seq |
| .....ucaUaucuggggccacgaugguu.....     | 3    | 1 | seq |
| .....ucacaucuggggccUcgaugguu.....     | 2    | 1 | seq |
| .....ucacaucuggCccacgaugguu.....      | 1101 | 1 | seq |
| .....ucacaucuggggccacgaugguu.....     | 1675 | 0 | seq |
| .....ucacaucuggggccacgaugguuA.....    | 4    | 1 | seq |
| .....uUacaucuggggccacgaugguuu.....    | 3    | 1 | seq |
| .....ucacaucuggggccacgaugguuC.....    | 51   | 1 | seq |
| .....ucacGucuggggccacgaugguuu.....    | 240  | 1 | seq |
| .....ucGcucuggggccacgaugguuu.....     | 1    | 1 | seq |
| .....ucacaucuggggccacgaugguuu.....    | 7    | 0 | seq |
| .....ucacaucuggCccacgaugguuu.....     | 1    | 1 | seq |
| .....ucacaucuggggccacgaugguuuU.....   | 1    | 1 | seq |
| .....ucacaucuggggccacgaugguuuC.....   | 1    | 1 | seq |
| .....ucacaucuggggccacgaugguuuu.....   | 2    | 0 | seq |
| .....ucacaucuggggccacgaugguuuGu.....  | 1    | 1 | seq |
| .....ucacaucuggggccacgaugguuCau.....  | 1    | 1 | seq |
| .....ucacaucuggggccacgaugguuCauc..... | 1    | 1 | seq |
| .....cacGucuggggccacgau.....          | 1    | 1 | seq |
| .....cacaucuggggccacgau.....          | 1    | 0 | seq |
| .....cacGucuggggccacgaug.....         | 5    | 1 | seq |
| .....cacaucuggggccacgaug.....         | 2    | 0 | seq |
| .....cacGucuggggccacgaugg.....        | 6    | 1 | seq |
| .....cacGucuggggccacgauggu.....       | 18   | 1 | seq |
| .....cacaucuggggccacgauggu.....       | 3    | 0 | seq |
| .....cacaucuggggccacgaugguG.....      | 1    | 1 | seq |
| .....cacaucuggggccacgaugguu.....      | 7    | 0 | seq |
| .....cacGucuggggccacgaugguu.....      | 22   | 1 | seq |
| .....cacaucuggggccacgaugguC.....      | 1    | 1 | seq |
| .....cacaucuggCccacgaugguu.....       | 3    | 1 | seq |
| .....cacGucuggggccacgaugguuu.....     | 33   | 1 | seq |
| .....cacaucuggggccacgaugguuC.....     | 1    | 1 | seq |
| .....acGucuggggccacgaug.....          | 12   | 1 | seq |
| .....acaucuggggccacgaug.....          | 1    | 0 | seq |
| .....acaucuggggccacgaugg.....         | 3    | 0 | seq |
| .....acGucuggggccacgaugg.....         | 3    | 1 | seq |
| .....acGucuggggccacgauggu.....        | 6    | 1 | seq |
| .....acaucuggggccacgauggu.....        | 7    | 0 | seq |
| .....acaucuggggccacgaugguu.....       | 9    | 0 | seq |
| .....acGucuggggccacgaugguu.....       | 76   | 1 | seq |
| .....acaucuggCccacgaugguu.....        | 2    | 1 | seq |
| .....acGucuggggccacgaugguuu.....      | 22   | 1 | seq |
| .....caucuggggccacgaCgg.....          | 1    | 1 | seq |
| .....caucuggggccacgaugg.....          | 9    | 0 | seq |
| .....caucuggggccacgauggC.....         | 4    | 1 | seq |
| .....caucuggggccacgaAggu.....         | 1    | 1 | seq |
| .....caucuggggccacgauggu.....         | 35   | 0 | seq |
| .....caucGggggccacgauggu.....         | 1    | 1 | seq |
| .....caucuggggccacgauggA.....         | 1    | 1 | seq |
| .....caucuggggccacgauggGu.....        | 1    | 1 | seq |
| .....caucuggggccacgaugguu.....        | 15   | 0 | seq |
| .....caucuggggccacgaugguuC.....       | 1    | 1 | seq |
| .....caucuggCccacgaugguu.....         | 1    | 1 | seq |
| .....cGucuggggccacgaugguu.....        | 44   | 1 | seq |
| .....caucCggggccacgaugguu.....        | 1    | 1 | seq |
| .....cGucuggggccacgaugguuu.....       | 2    | 1 | seq |
| .....aucuggggccacgauggu.....          | 4    | 0 | seq |
| .....aucuggggccacgauggA.....          | 1    | 1 | seq |
| .....aucuggggccacgauggGu.....         | 1    | 1 | seq |
| .....Uucuggggccacgaugguu.....         | 1    | 1 | seq |
| .....aucuggggccacgaugguu.....         | 60   | 0 | seq |
| .....aucuggggccacgauggCu.....         | 1    | 1 | seq |
| .....aucuggggccacgaugguuC.....        | 11   | 1 | seq |
| .....aucuggCccacgaugguu.....          | 1    | 1 | seq |
| .....aucGggggccacgaugguu.....         | 3    | 1 | seq |
| .....aucuggggccacgaugguuC.....        | 1    | 1 | seq |
| .....ucuggggccacgauggGu.....          | 2    | 1 | seq |
| .....ucuggggccCcgauugguu.....         | 50   | 1 | seq |
| .....Ccuggggccacgaugguu.....          | 2    | 1 | seq |
| .....ucuggggccacgaugguuC.....         | 46   | 1 | seq |

## Mature

## Star

|                                                                        |                                            |   |     |  |
|------------------------------------------------------------------------|--------------------------------------------|---|-----|--|
| agagguuuuggaggugaucuucacacucugggccacgaugguuuauuuuucucuguuuuuuuaucauaaa | ccauggugccccagagagaagagcaccuucgccuucguuuau |   |     |  |
| .....ucugggccacgaugguA.....                                            | 6                                          | 1 | seq |  |
| .....Acugggccacgaugguu.....                                            | 1                                          | 1 | seq |  |
| .....ucugggcUacgaugguu.....                                            | 1                                          | 1 | seq |  |
| .....ucugggccacgaugguu.....                                            | 262                                        | 0 | seq |  |
| .....ucugggAcacgaugguu.....                                            | 1                                          | 1 | seq |  |
| .....ucugUgccacgaugguu.....                                            | 1                                          | 1 | seq |  |
| .....ucugggccacgauggAu.....                                            | 1                                          | 1 | seq |  |
| .....ucugAgccacgaugguu.....                                            | 1                                          | 1 | seq |  |
| .....ucugggccacgaugguuu.....                                           | 4                                          | 0 | seq |  |
| .....ucugggccCcgauuguuu.....                                           | 1                                          | 1 | seq |  |
| .....ucugggccacgaugguuua.....                                          | 2                                          | 0 | seq |  |
| .....ucugggccacgaugguuuau.....                                         | 2                                          | 0 | seq |  |
| .....ucugggccacgaugguuAauC.....                                        | 3                                          | 1 | seq |  |
| .....ucugggAccacgaugguuuauC.....                                       | 7                                          | 1 | seq |  |
| .....ucCgggccacgaugguuuauC.....                                        | 10                                         | 1 | seq |  |
| .....ucugggccacgaugguuuauG.....                                        | 3                                          | 1 | seq |  |
| .....ucugggccacgaugguuuauUu.....                                       | 2                                          | 1 | seq |  |
| .....ucugggccacgaugguuAaucu.....                                       | 3                                          | 1 | seq |  |
| .....ucugggAccacgaugguuuauCu.....                                      | 3                                          | 1 | seq |  |
| .....ucCgggccacgaugguuuauCu.....                                       | 9                                          | 1 | seq |  |
| .....ucCgggccacgaugguuuauCu.....                                       | 1                                          | 1 | seq |  |
| .....ucCgggccacgaugguuuauCuuc.....                                     | 1                                          | 1 | seq |  |
| .....ucauaaaccgauggugccccagauU.....                                    | 1                                          | 1 | seq |  |
| .....cauaaaccgauggugccccag.....                                        | 1                                          | 0 | seq |  |
| .....auaaaccgauggugccccagau.....                                       | 2                                          | 0 | seq |  |
| .....auaaaccgauggugccccagauC.....                                      | 1                                          | 1 | seq |  |
| .....uaaaccgauggugccccagauA.....                                       | 2                                          | 1 | seq |  |
| .....uaaaccGuggugccccagaug.....                                        | 1                                          | 1 | seq |  |
| .....uaaaccuCGugccccagaug.....                                         | 3                                          | 1 | seq |  |
| .....uaaaccgauggugccccagaug.....                                       | 30                                         | 0 | seq |  |
| .....uaaaccgauggugccccagauGU.....                                      | 1                                          | 1 | seq |  |
| .....aaccuCGugccccaga.....                                             | 1                                          | 1 | seq |  |
| .....ccauggugccccagaug.....                                            | 1                                          | 0 | seq |  |
| .....ccauggugccccagagaga.....                                          | 5                                          | 0 | seq |  |
| .....ccauggugccccagagagG.....                                          | 1                                          | 1 | seq |  |
| .....ccauggugccccagagagaa.....                                         | 3                                          | 0 | seq |  |
| .....ccauggugccccGgaugagaag.....                                       | 1                                          | 1 | seq |  |
| .....ccauggugccccagagagaag.....                                        | 15                                         | 0 | seq |  |
| .....cauggugccccagagagaag.....                                         | 1                                          | 0 | seq |  |
| .....auggugccccagagaga.....                                            | 3                                          | 0 | seq |  |
| .....auggugccccagagagaaA.....                                          | 1                                          | 1 | seq |  |
| .....auggugccccagagagaag.....                                          | 7                                          | 0 | seq |  |



# Mature Star

augugguucuaugguuaguggugaggagacauuggacuuuugaauccauaaccaggaguucaaaauaucgauggaaccuacauucuuuuuucacuccuuuaauuauugguu

|                                          |      |   |     |
|------------------------------------------|------|---|-----|
| .....uagugguAaggacauuggacuu.....         | 2    | 1 | seq |
| .....uaguggugaggacauuggacuu.....         | 1    | 0 | seq |
| .....uagugguCaggacauuggacuu.....         | 1    | 1 | seq |
| .....uagCggugaggacauuggacuu.....         | 11   | 1 | seq |
| .....uaguggugaggacauuggacuuGg.....       | 1    | 1 | seq |
| .....uaguggugaggacauuggacuuGgaaucca..... | 2    | 1 | seq |
| .....aguggugaggacauugC.....              | 1    | 1 | seq |
| .....aguggugaggacauugg.....              | 18   | 0 | seq |
| .....aguggugaggacauCgg.....              | 1    | 1 | seq |
| .....aguggugaggacauugA.....              | 1    | 1 | seq |
| .....aguggugaggacauugga.....             | 6    | 0 | seq |
| .....aguggugaggacauuggacG.....           | 5    | 1 | seq |
| .....aguggugaggCcauuggacu.....           | 1    | 1 | seq |
| .....aguggugaggacauuggacA.....           | 5    | 1 | seq |
| .....aguggugGggacauuggacu.....           | 1    | 1 | seq |
| .....aguggugaggacauuggacC.....           | 25   | 1 | seq |
| .....aguggugaggacauuggacu.....           | 115  | 0 | seq |
| .....aguggugaggacauuggacuu.....          | 2    | 0 | seq |
| .....agugguCaggacauuggacuu.....          | 2    | 1 | seq |
| .....agCggugaggacauuggacuu.....          | 4    | 1 | seq |
| .....agugguAaggacauuggacuu.....          | 1    | 1 | seq |
| .....aguggugaggacauuggacuuG.....         | 1    | 1 | seq |
| .....guggugaggacauugga.....              | 47   | 0 | seq |
| .....guggugaggacauuggac.....             | 1    | 0 | seq |
| .....guggugaggacauugAacu.....            | 1    | 1 | seq |
| .....guggugaggagauuggacu.....            | 1    | 1 | seq |
| .....gugUugaggacauuggacu.....            | 1    | 1 | seq |
| .....guggugaggGcauuggacu.....            | 3    | 1 | seq |
| .....Nuggugaggacauuggacu.....            | 1    | 1 | seq |
| .....guggugaggacAauggacu.....            | 2    | 1 | seq |
| .....Auggugaggacauuggacu.....            | 2    | 1 | seq |
| .....guggugaggacauuAgacu.....            | 1    | 1 | seq |
| .....guggugaggacauuggacu.....            | 1382 | 0 | seq |
| .....guggugCggacauuggacu.....            | 1    | 1 | seq |
| .....guggugaggacauuggaUu.....            | 4    | 1 | seq |
| .....guggugaggacauuggUcu.....            | 1    | 1 | seq |
| .....guggugaggacauuggacG.....            | 49   | 1 | seq |
| .....Cuggugaggacauuggacu.....            | 2    | 1 | seq |
| .....guggugagAacauuggacu.....            | 3    | 1 | seq |
| .....Uuggugaggacauuggacu.....            | 1    | 1 | seq |
| .....guggugaggacauCggacu.....            | 1    | 1 | seq |
| .....guggugaggacauAaggacu.....           | 2    | 1 | seq |
| .....guggCgaggacauuggacu.....            | 3    | 1 | seq |
| .....guggugUggacauuggacu.....            | 2    | 1 | seq |
| .....gAggugaggacauuggacu.....            | 1    | 1 | seq |
| .....guggugaggUcauuggacu.....            | 1    | 1 | seq |
| .....guggugaggacGuuggacu.....            | 2    | 1 | seq |
| .....guggugaggacauuggacA.....            | 36   | 1 | seq |
| .....guggugGggacauuggacu.....            | 8    | 1 | seq |
| .....guggugaggacauuggacC.....            | 233  | 1 | seq |
| .....guggugaggacauGggacu.....            | 1    | 1 | seq |
| .....guggugaggacaCuggacu.....            | 1    | 1 | seq |
| .....guggugaggCcauuggacu.....            | 1    | 1 | seq |
| .....guggugaggacauuggCcu.....            | 1    | 1 | seq |
| .....gugAuggagacauuggacu.....            | 1    | 1 | seq |
| .....gugguCaggacauuggacuu.....           | 7    | 1 | seq |
| .....gugguUaggacauuggacuu.....           | 1    | 1 | seq |
| .....gugguAaggacauuggacuu.....           | 4    | 1 | seq |
| .....guggugaggacauuggacCu.....           | 4    | 1 | seq |
| .....guggugaggacauuggacuu.....           | 15   | 0 | seq |
| .....gCggugaggacauuggacuu.....           | 23   | 1 | seq |
| .....uggugaggacauuggac.....              | 8    | 0 | seq |
| .....uggugaggacauuggCc.....              | 1    | 1 | seq |
| .....uggugaggacauuggaU.....              | 1    | 1 | seq |
| .....uggugaggUcauuggacu.....             | 1    | 1 | seq |
| .....uggGgaggacauuggacu.....             | 1    | 1 | seq |
| .....uggCgaggacauuggacu.....             | 16   | 1 | seq |
| .....Nggugaggacauuggacu.....             | 8    | 1 | seq |
| .....uggugaggacauugAacu.....             | 1    | 1 | seq |
| .....uggugGggacauuggacu.....             | 20   | 1 | seq |

# Mature Star

augugguucuaugguauaguggugaggagacauuggacuuugaauccaauaaccaggaguucaaauaucgauggaaccuacauucuuuguuuuucaucuuuaauuauugguu

|                                                     |      |   |     |
|-----------------------------------------------------|------|---|-----|
| .....uggugaggacauuggCcu.....                        | 3    | 1 | seq |
| .....uggugaggacauuggacu.....                        | 4851 | 0 | seq |
| .....uggugaggacacuggacu.....                        | 9    | 1 | seq |
| .....ugAugaggacauuggacu.....                        | 1    | 1 | seq |
| .....uggAgaggacauuggacu.....                        | 3    | 1 | seq |
| .....uggugaggacauAggacu.....                        | 3    | 1 | seq |
| .....uggugaggCcauuggacu.....                        | 1    | 1 | seq |
| .....uggugaggacauuggaUu.....                        | 3    | 1 | seq |
| .....uggugCggacauuggacu.....                        | 1    | 1 | seq |
| .....uggugaggacauugCacu.....                        | 2    | 1 | seq |
| .....uggugaggacauuggacC.....                        | 848  | 1 | seq |
| .....uggugaggacauugUacu.....                        | 2    | 1 | seq |
| .....uggugaggacauGggacu.....                        | 3    | 1 | seq |
| .....uCGugaggacauuggacu.....                        | 1    | 1 | seq |
| .....uggugaggacauuggUcu.....                        | 3    | 1 | seq |
| .....uggugaggacaAuggacu.....                        | 1    | 1 | seq |
| .....uggugaggacauuAgacu.....                        | 3    | 1 | seq |
| .....uggugUggacauuggacu.....                        | 4    | 1 | seq |
| .....uggugagAacuuggacu.....                         | 3    | 1 | seq |
| .....uggugaggacauCggacu.....                        | 15   | 1 | seq |
| .....uggugaAgacauuggacu.....                        | 1    | 1 | seq |
| .....uggugaggacaGuggacu.....                        | 1    | 1 | seq |
| .....uAugaggacauuggacu.....                         | 4    | 1 | seq |
| .....uggugaggacauuggacG.....                        | 166  | 1 | seq |
| .....uggugaggacauuggacA.....                        | 176  | 1 | seq |
| .....ugguAaggacauuggacuu.....                       | 13   | 1 | seq |
| .....uggugaggacauuggacuu.....                       | 33   | 0 | seq |
| .....uggugaggacauuggGcuu.....                       | 1    | 1 | seq |
| .....ugguUaggacauuggacuu.....                       | 1    | 1 | seq |
| .....Gggugaggacauuggacuu.....                       | 1    | 1 | seq |
| .....uggugaggacauuggacCu.....                       | 1    | 1 | seq |
| .....uggugaggacauuggacuG.....                       | 7    | 1 | seq |
| .....ugguCaggacauuggacuu.....                       | 7    | 1 | seq |
| .....Aggugaggacauuggacuu.....                       | 1    | 1 | seq |
| .....Cggugaggacauuggacuu.....                       | 29   | 1 | seq |
| .....uggugaggacauuggacuGu.....                      | 1    | 1 | seq |
| .....uggugaggacauuggacuuu.....                      | 2    | 0 | seq |
| .....uggugaggacauuggacuuug.....                     | 1    | 0 | seq |
| .....uggugaggacauuggacuuGgaaucca.....               | 1    | 1 | seq |
| .....uggugaggacauuggacuuugaaucca.....               | 2    | 0 | seq |
| .....uggugaggacauuggacuuugaauccaGuaacccgaguuca..... | 1    | 1 | seq |
| .....ggugaggacauuggaUu.....                         | 1    | 1 | seq |
| .....ggugaggacaCuggacu.....                         | 6    | 1 | seq |
| .....ggugaggacauuAgacu.....                         | 2    | 1 | seq |
| .....ggugGggacauuggacu.....                         | 5    | 1 | seq |
| .....CGugaggacauuggacu.....                         | 2    | 1 | seq |
| .....ggugaAgacuuggacu.....                          | 1    | 1 | seq |
| .....ggugaggacauGggacu.....                         | 1    | 1 | seq |
| .....ggCgaggacauuggacu.....                         | 9    | 1 | seq |
| .....ggugaggacauuggacA.....                         | 63   | 1 | seq |
| .....Agugaggacauuggacu.....                         | 3    | 1 | seq |
| .....ggugaggacauuggUcu.....                         | 1    | 1 | seq |
| .....ggugaggacauCggacu.....                         | 3    | 1 | seq |
| .....ggugaggacaGuggacu.....                         | 1    | 1 | seq |
| .....ggugagAacuuggacu.....                          | 1    | 1 | seq |
| .....ggugaggacauuggacC.....                         | 288  | 1 | seq |
| .....ggugaggacauuggacu.....                         | 3    | 1 | seq |
| .....gAugaggacauuggacu.....                         | 3    | 1 | seq |
| .....ggAgaggacauuggacu.....                         | 2    | 1 | seq |
| .....ggugaggacauuggacG.....                         | 75   | 1 | seq |
| .....Ugugaggacauuggacu.....                         | 2    | 1 | seq |
| .....ggugaggacauuUgacu.....                         | 1    | 1 | seq |
| .....ggugaUgacuuggacu.....                          | 1    | 1 | seq |
| .....ggugaggUcauuggacu.....                         | 1    | 1 | seq |
| .....ggugagUacuuggacu.....                          | 1    | 1 | seq |
| .....ggugUggacauuggacu.....                         | 3    | 1 | seq |
| .....ggugaggacauugAacu.....                         | 1    | 1 | seq |
| .....ggugaggacauuggaGu.....                         | 1    | 1 | seq |
| .....ggugaggacauuggacu.....                         | 1978 | 0 | seq |
| .....ggugaggacauAggacu.....                         | 1    | 1 | seq |

# Mature Star

|                                                                                                               |    |   |     |
|---------------------------------------------------------------------------------------------------------------|----|---|-----|
| augugguucuaugguauaguggugaggacauuggacuuugaauccaauaaccgagauucaaaauaucgauggaaccuacauucuuuuuuccauccuuuaauuauugguu |    |   |     |
| .....Ngugaggacauuggacu.....                                                                                   | 1  | 1 | seq |
| .....ggugaggacauuggacCu.....                                                                                  | 1  | 1 | seq |
| .....gguUaggacauuggacuu.....                                                                                  | 17 | 1 | seq |
| .....ggugaggacauuggacuu.....                                                                                  | 42 | 0 | seq |
| .....ggugaggacauuggGcuu.....                                                                                  | 1  | 1 | seq |
| .....ggugagUacauuggacuu.....                                                                                  | 1  | 1 | seq |
| .....gguUaggacauuggacuu.....                                                                                  | 5  | 1 | seq |
| .....gguCaggacauuggacuu.....                                                                                  | 8  | 1 | seq |
| .....gguUaggacauuggacuuu.....                                                                                 | 1  | 1 | seq |
| .....ggugaggacauuggacuuug.....                                                                                | 1  | 0 | seq |
| .....gguCaggacauuggacuuugaauuc.....                                                                           | 1  | 1 | seq |
| .....ggugaggacauuggacuuugaaucca.....                                                                          | 1  | 0 | seq |
| .....gugaggacauuggacuu.....                                                                                   | 6  | 0 | seq |
| .....guCaggacauuggacuu.....                                                                                   | 1  | 1 | seq |
| .....guUaggacauuggacuu.....                                                                                   | 3  | 1 | seq |
| .....gugaggacauuggacuuu.....                                                                                  | 1  | 0 | seq |
| .....gugaggacauuggacuuG.....                                                                                  | 1  | 1 | seq |
| .....gugaggacauuggacuuGg.....                                                                                 | 1  | 1 | seq |
| .....gugaggacauuggacuuug.....                                                                                 | 1  | 0 | seq |
| .....gugaggacauuggacuuGgaaucc.....                                                                            | 1  | 1 | seq |
| .....gugaggacauuggacuuGgaauccaa.....                                                                          | 1  | 1 | seq |
| .....uUaggacauuggacuuu.....                                                                                   | 1  | 1 | seq |
| .....uCaggacauuggacuuu.....                                                                                   | 1  | 1 | seq |
| .....ugaggacauuggacuuC.....                                                                                   | 2  | 1 | seq |
| .....ugaggacauuggacuuG.....                                                                                   | 1  | 1 | seq |
| .....uCaggacauuggacuuug.....                                                                                  | 2  | 1 | seq |
| .....ugaggacauuggGcuuug.....                                                                                  | 1  | 1 | seq |
| .....ugaggacauuggacuuug.....                                                                                  | 3  | 0 | seq |
| .....ugaggacauuggacuuugaaucc.....                                                                             | 2  | 0 | seq |
| .....uUaggacauuggacuuugaaucca.....                                                                            | 1  | 1 | seq |
| .....ugaggacauuggacuuugaaucca.....                                                                            | 3  | 0 | seq |
| .....uUaggacauuggacuuugaaucca.....                                                                            | 1  | 1 | seq |
| .....gaggacauuggacuuug.....                                                                                   | 2  | 0 | seq |
| .....Uaggacauuggacuuug.....                                                                                   | 3  | 1 | seq |
| .....Caggacauuggacuuug.....                                                                                   | 1  | 1 | seq |
| .....aggacauuggacuuugaaucca.....                                                                              | 2  | 0 | seq |
| .....aggacauuggacuuugaauccaGuaacccgagu.....                                                                   | 1  | 1 | seq |
| .....ggacauuggacuuugaaucca.....                                                                               | 1  | 0 | seq |
| .....acauuggacuuugaaucca.....                                                                                 | 1  | 0 | seq |
| .....cauuggacuuugaauca.....                                                                                   | 1  | 1 | seq |
| .....Gauuggacuuugaaucca.....                                                                                  | 1  | 1 | seq |
| .....auuggacuuugaaucca.....                                                                                   | 1  | 0 | seq |
| .....cuuugaauccaGuaacccga.....                                                                                | 1  | 1 | seq |
| .....cuuugaauccaGuaacccgagu.....                                                                              | 1  | 1 | seq |
| .....aauccaauaaccgaguuc.....                                                                                  | 1  | 0 | seq |
| .....auccaauaaccgaguu.....                                                                                    | 1  | 0 | seq |
| .....auccaauaaccgaguuc.....                                                                                   | 1  | 0 | seq |
| .....uccaUuaacccgaguuc.....                                                                                   | 1  | 1 | seq |
| .....uccaauaaccgaguuc.....                                                                                    | 1  | 0 | seq |

Provisional ID : MA\_13984\_4785  
 Score total : 0.3  
 Score for star read(s) : -1.3  
 Score for read counts : 0  
 Score for mfe : 0  
 Score for randfold : 1.6  
 Score for cons. seed :  
 Total read count : 15  
 Mature read count : 15  
 Loop read count : 0  
 Star read count : 0

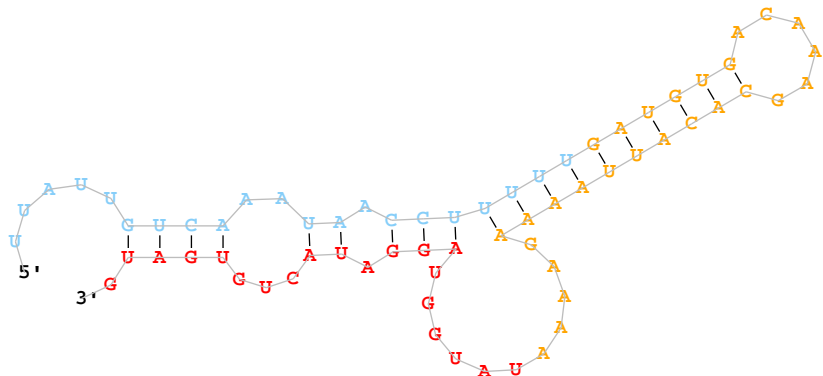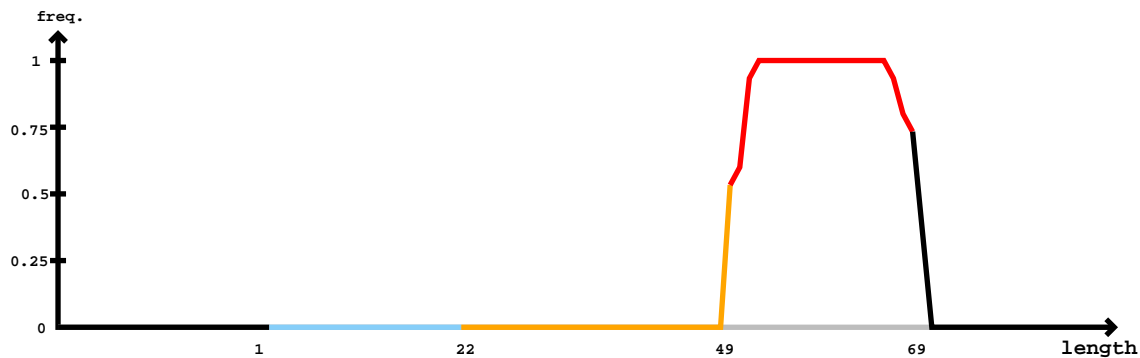

Star

Mature

| 5'                   |                      | -3'                         | exp                                  |       |    |
|----------------------|----------------------|-----------------------------|--------------------------------------|-------|----|
| uguugcauuaauggcuucua | uuaugucaaaauaacuuuuu | gaugugacaaagcacauuaaaagaaaa | uagguaggauacugugauggaggagauaugaucaua | reads | mm |
| (((((                | (((((                | (((((                       | (((((                                | 1     | 1  |
| .....                | .....                | .....                       | .....                                | 1     | 1  |
| .....                | .....                | .....                       | .....                                | 1     | 1  |
| .....                | .....                | .....                       | .....                                | 5     | 1  |
| .....                | .....                | .....                       | .....                                | 1     | 0  |
| .....                | .....                | .....                       | .....                                | 5     | 0  |
| .....                | .....                | .....                       | .....                                | 1     | 0  |



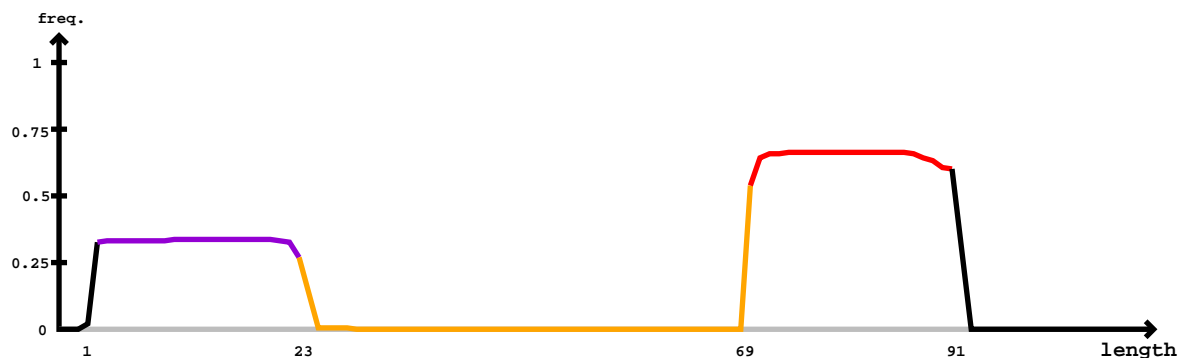

## Mature

[illegible]

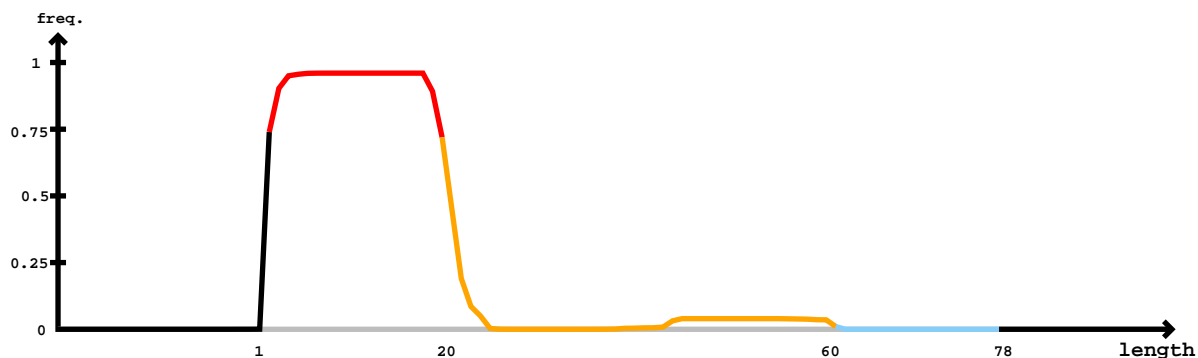

Star

|                                                                                                                               | -3'   | exp |        |
|-------------------------------------------------------------------------------------------------------------------------------|-------|-----|--------|
| 5'- auuuaaaaauauuuuggcaguccgguuguagucuaaguuaggguuaguuuucauuugucugcucaccccgagagaccggguucaauuuccugacaacggaaguuaaaaauauuuuuuguag |       |     |        |
| . . . ((((((((((((((.-(((((((((. . . (((((.(. . . ((.-((((.(. . . ))))))). . . ) . )))))). . . ))))))))))) . . . . .          | reads | mm  | sample |
| . . . . . aCuuccgguuguagucuagu . . . . .                                                                                      | 1     | 1   | seq    |
| . . . . . Cguuccgguuguagucuaguug . . . . .                                                                                    | 1     | 1   | seq    |
| . . . . . guuccgguuguCgucuagu . . . . .                                                                                       | 1     | 1   | seq    |
| . . . . . uCcpgguuguagucuagu . . . . .                                                                                        | 1     | 1   | seq    |
| . . . . . uuuccgguuguagucuagu . . . . .                                                                                       | 1     | 0   | seq    |
| . . . . . uuuccgguuguagucuaguug . . . . .                                                                                     | 1     | 0   | seq    |
| . . . . . uuuccgCuguagucuaguug . . . . .                                                                                      | 1     | 1   | seq    |
| . . . . . uuuccgguuguagucuaguugg . . . . .                                                                                    | 1     | 0   | seq    |
| . . . . . uuuccgguuguagucuaguugggu . . . . .                                                                                  | 1     | 0   | seq    |
| . . . . . uuuccgguuguagucuaguugguu . . . . .                                                                                  | 2     | 0   | seq    |
| . . . . . uccgguuguagucuagCu . . . . .                                                                                        | 77    | 1   | seq    |
| . . . . . uccUuuuguagucuagu . . . . .                                                                                         | 1     | 1   | seq    |
| . . . . . uccgguuguGgucuagu . . . . .                                                                                         | 7     | 1   | seq    |
| . . . . . uccgAuguagucuagu . . . . .                                                                                          | 1     | 1   | seq    |
| . . . . . uccgCuguagucuagu . . . . .                                                                                          | 6     | 1   | seq    |
| . . . . . uccgguuguagucuagGu . . . . .                                                                                        | 6     | 1   | seq    |
| . . . . . uccgguuguagucGagu . . . . .                                                                                         | 2     | 1   | seq    |
| . . . . . uccgguuguagucuCGu . . . . .                                                                                         | 1     | 1   | seq    |
| . . . . . uccgguuguagucuagG . . . . .                                                                                         | 35    | 1   | seq    |
| . . . . . uccgguuguagucuACuu . . . . .                                                                                        | 1     | 1   | seq    |
| . . . . . uccgguuguagACuagu . . . . .                                                                                         | 3     | 1   | seq    |
| . . . . . uccgguugCagucuagu . . . . .                                                                                         | 3     | 1   | seq    |
| . . . . . uccgguuguTgucuagu . . . . .                                                                                         | 11    | 1   | seq    |
| . . . . . Gccgguuguagucuagu . . . . .                                                                                         | 3     | 1   | seq    |
| . . . . . uccgguuguagucuagA . . . . .                                                                                         | 121   | 1   | seq    |
| . . . . . Nccgguuguagucuagu . . . . .                                                                                         | 4     | 1   | seq    |
| . . . . . uccgguuguagucuagu . . . . .                                                                                         | 2009  | 0   | seq    |
| . . . . . uccgguuAuagucuagu . . . . .                                                                                         | 1     | 1   | seq    |
| . . . . . uccgguuguagucuTgu . . . . .                                                                                         | 1     | 1   | seq    |
| . . . . . uccgguuguagGcuagu . . . . .                                                                                         | 2     | 1   | seq    |
| . . . . . uccguAguagucuagu . . . . .                                                                                          | 1     | 1   | seq    |
| . . . . . uccgguuguagucuaguC . . . . .                                                                                        | 288   | 1   | seq    |
| . . . . . uccguugGagucuagu . . . . .                                                                                          | 1     | 1   | seq    |
| . . . . . uccguuguAuacuaguug . . . . .                                                                                        | 2     | 1   | seq    |

**Mature**

Star

|                                                                                                                                 |      |   |     |
|---------------------------------------------------------------------------------------------------------------------------------|------|---|-----|
| aaauaaauaaauuuuggcaguuuccguguuagucuaaguuugguuuaguuuacauugucugcucaccccgagagacccggguuccaaauccugacaaacgggaaguuuaaaauaaauuuuuuguaag |      |   |     |
| .....ucGguuuguaagucuaaguuug.....                                                                                                | 2    | 1 | seq |
| .....ucCguuuguuGguucuaaguuug.....                                                                                               | 8    | 1 | seq |
| .....ucCguuuguuagucuaaguuug.....                                                                                                | 4470 | 0 | seq |
| .....ucCguuuguaagGcuaguuug.....                                                                                                 | 2    | 1 | seq |
| .....ucCguuuguaagucuaagGuug.....                                                                                                | 16   | 1 | seq |
| .....ucCguuuguuagucGaguuug.....                                                                                                 | 2    | 1 | seq |
| .....ucCguuuguaagAcuaaguuug.....                                                                                                | 3    | 1 | seq |
| .....Gccguuuguaagucuaaguuug.....                                                                                                | 4    | 1 | seq |
| .....ucCguuAguagucuaaguuug.....                                                                                                 | 3    | 1 | seq |
| .....ucCgCuuguagucuaaguuug.....                                                                                                 | 8    | 1 | seq |
| .....ucCguuuguaagucuCguug.....                                                                                                  | 1    | 1 | seq |
| .....Nccguuuguaagucuaaguuug.....                                                                                                | 4    | 1 | seq |
| .....uccPuuguaagucuaaguuug.....                                                                                                 | 1    | 1 | seq |
| .....ucCguuCuagucuaaguuug.....                                                                                                  | 1    | 1 | seq |
| .....ucCguuuguaagucuaagCuug.....                                                                                                | 98   | 1 | seq |
| .....ucCguuuguaagucuaagAuug.....                                                                                                | 3    | 1 | seq |
| .....ucCguuugCagucuaaguuug.....                                                                                                 | 10   | 1 | seq |
| .....ucCguuuguaaguAuaguuug.....                                                                                                 | 1    | 1 | seq |
| .....ucCguuugAagucuaaguuug.....                                                                                                 | 1    | 1 | seq |
| .....ucCguuuguaPuucuaaguuug.....                                                                                                | 3    | 1 | seq |
| .....ucCgGuuguagucuaaguuug.....                                                                                                 | 1    | 1 | seq |
| .....ucCguuuguaagucuaaguAg.....                                                                                                 | 34   | 1 | seq |
| .....ucCguuuguaagucuaaguuC.....                                                                                                 | 6    | 1 | seq |
| .....ucCguuuguaCuucuaaguuug.....                                                                                                | 1    | 1 | seq |
| .....ucCguuuguaaguPuaguuug.....                                                                                                 | 5    | 1 | seq |
| .....ucCguuugGagucuaaguuug.....                                                                                                 | 1    | 1 | seq |
| .....ucCguuuguaagucuaaguGg.....                                                                                                 | 19   | 1 | seq |
| .....ucCguuuguuPgucuaaguuug.....                                                                                                | 1    | 1 | seq |
| .....ucCguuAuagucuaaguuug.....                                                                                                  | 3    | 1 | seq |
| .....ucCguuuguuCguucuaaguuug.....                                                                                               | 2    | 1 | seq |
| .....ucCguuuguaagucuaaguuuPu.....                                                                                               | 22   | 1 | seq |
| .....ucCguuuguaagucuaaguCg.....                                                                                                 | 29   | 1 | seq |
| .....ucCguuuguaagucuaaguuuA.....                                                                                                | 203  | 1 | seq |
| .....ucCguuuguaagucuaaPuug.....                                                                                                 | 2    | 1 | seq |
| .....Gccguuuguaagucuaaguuggg.....                                                                                               | 15   | 1 | seq |
| .....ucCgCuuguagucuaaguuggg.....                                                                                                | 18   | 1 | seq |
| .....ucCguuuguaaguGuaguuggg.....                                                                                                | 1    | 1 | seq |
| .....ucCguuugCagucuaaguuggg.....                                                                                                | 18   | 1 | seq |
| .....ucCguuuguaAuucuaaguuggg.....                                                                                               | 5    | 1 | seq |
| .....ucCguuuguuPgucuaaguuggg.....                                                                                               | 6    | 1 | seq |
| .....uNccguuuguaagucuaaguuggg.....                                                                                              | 1    | 1 | seq |
| .....Accguuuguaagucuaaguuggg.....                                                                                               | 6    | 1 | seq |
| .....ucCguuuguaagucuaagGuuggg.....                                                                                              | 3    | 1 | seq |
| .....ucCguuugAagucuaaguuggg.....                                                                                                | 3    | 1 | seq |
| .....uAccguuuguaagucuaaguuggg.....                                                                                              | 1    | 1 | seq |
| .....ucCguuuguaagucuCguuggg.....                                                                                                | 1    | 1 | seq |
| .....ucCguuuguaagucGaguuggg.....                                                                                                | 1    | 1 | seq |
| .....ucCguuuguaagucuaagCuuggg.....                                                                                              | 71   | 1 | seq |
| .....ucCguuuguaagucuaaguuuCg.....                                                                                               | 3    | 1 | seq |
| .....ucCguuuguaagucuaagAuuggg.....                                                                                              | 3    | 1 | seq |
| .....ucCguuuguaagucuaaguugA.....                                                                                                | 592  | 1 | seq |
| .....uccPuuguaagucuaaguuggg.....                                                                                                | 1    | 1 | seq |
| .....ucCguuuguaagucuaaguugPu.....                                                                                               | 97   | 1 | seq |
| .....ucCguuuguaagucuaaguuuAg.....                                                                                               | 41   | 1 | seq |
| .....ucCguuuguuGguucuaaguuggg.....                                                                                              | 25   | 1 | seq |
| .....Nccguuuguaagucuaaguuggg.....                                                                                               | 12   | 1 | seq |
| .....ucCguuGguagucuaaguuggg.....                                                                                                | 1    | 1 | seq |
| .....ucCgGuuguagucuaaguuggg.....                                                                                                | 1    | 1 | seq |
| .....ucCguuuguaaguPuaguuggg.....                                                                                                | 7    | 1 | seq |
| .....ucCguuAguagucuaaguuggg.....                                                                                                | 3    | 1 | seq |
| .....ucCguuugGaguucuaaguuggg.....                                                                                               | 1    | 1 | seq |
| .....ucCguuuguaagucuuPgauuggg.....                                                                                              | 3    | 1 | seq |
| .....ucGguuuguaagucuaaguuggg.....                                                                                               | 1    | 1 | seq |
| .....ucCguuuguaagucuaaguugC.....                                                                                                | 71   | 1 | seq |
| .....ucCguuuguaagucuaaguuggg.....                                                                                               | 7467 | 0 | seq |
| .....ucCgAuuguagucuaaguuggg.....                                                                                                | 4    | 1 | seq |
| .....ucCguuuguaagGcuaguuggg.....                                                                                                | 3    | 1 | seq |
| .....ucCguuuguaaguAuaguuggg.....                                                                                                | 1    | 1 | seq |
| .....ucCguuuguaagucAaguuggg.....                                                                                                | 1    | 1 | seq |
| .....ucCguuuguaagAcuaaguuggg.....                                                                                               | 5    | 1 | seq |

## Mature

## Star

[illegible]

|                                     |      |   |     |
|-------------------------------------|------|---|-----|
| .....uccguugugCgucuaugugg.....      | 2    | 1 | seq |
| .....uccguugugagucuauguggg.....     | 11   | 1 | seq |
| .....uccguugugagucuaugagg.....      | 44   | 1 | seq |
| .....uccguugugagucuaCuugg.....      | 1    | 1 | seq |
| .....uccguugugagucuauguCgg.....     | 34   | 1 | seq |
| .....uccCuugugagucuauguggu.....     | 1    | 1 | seq |
| .....uccguugugaguUuaguuggu.....     | 1    | 1 | seq |
| .....Gccguugugagucuauguuuggu.....   | 5    | 1 | seq |
| .....uccguuguaAucauguuuggu.....     | 1    | 1 | seq |
| .....uccguugugaguGuaguuggu.....     | 1    | 1 | seq |
| .....uccguugugagucuaugugggG.....    | 124  | 1 | seq |
| .....uccguugugagucuaCuuggu.....     | 1    | 1 | seq |
| .....uccguugugGgucuauguuuggu.....   | 13   | 1 | seq |
| .....uccguugugagucuauguuuggC.....   | 1484 | 1 | seq |
| .....uccguugugagucuauguggggu.....   | 3    | 1 | seq |
| .....uccguugugagucuauguaAggu.....   | 22   | 1 | seq |
| .....uccgCugugagucuauguuuggu.....   | 12   | 1 | seq |
| .....uccgguuAuagucuauguuuggu.....   | 1    | 1 | seq |
| .....uccguugugagucuaagAuuggu.....   | 1    | 1 | seq |
| .....uccguugugagucuauguuuggA.....   | 85   | 1 | seq |
| .....uccguugugagucuauguuuggu.....   | 3642 | 0 | seq |
| .....Nccguugugagucuauguuuggu.....   | 7    | 1 | seq |
| .....Cccguugugagucuauguuuggu.....   | 11   | 1 | seq |
| .....uccguugugaguAuaguuggu.....     | 1    | 1 | seq |
| .....uccguugugagAcuauguuuggu.....   | 3    | 1 | seq |
| .....Accguugugagucuauguuuggu.....   | 1    | 1 | seq |
| .....uccguugugagucuuUguuggu.....    | 3    | 1 | seq |
| .....uccguuguaUucuauguuuggu.....    | 1    | 1 | seq |
| .....uccguugugagucGaguuggu.....     | 1    | 1 | seq |
| .....uccguugAgagucuauguuuggu.....   | 1    | 1 | seq |
| .....uccguugugagucuauguuuC.....     | 1    | 1 | seq |
| .....uccguugugagucuauguuCG.....     | 1    | 1 | seq |
| .....uccguugugagucuaUuuggu.....     | 1    | 1 | seq |
| .....uccguugugagucuauguuuAgu.....   | 5    | 1 | seq |
| .....uccGguugugagucuauguuuggu.....  | 2    | 1 | seq |
| .....uccguugguUgucuauguuuggu.....   | 1    | 1 | seq |
| .....uccguugugagucuaagGuuggu.....   | 2    | 1 | seq |
| .....uccguugugagucuauguCgg.....     | 5    | 1 | seq |
| .....uccguugugagucAaguuggu.....     | 1    | 1 | seq |
| .....uccguugGagucuauguuuggu.....    | 6    | 1 | seq |
| .....uccguuAguagucuauguuuggu.....   | 2    | 1 | seq |
| .....uccguugugagucuaagCuggu.....    | 15   | 1 | seq |
| .....uccguugugagucuauguuuAu.....    | 38   | 1 | seq |
| .....uccgGuugugagucuauguuugguu..... | 1    | 1 | seq |
| .....uccguugugagucuuCguugguu.....   | 1    | 1 | seq |
| .....uccguugugagucuauguuugguu.....  | 2760 | 0 | seq |
| .....uccguugugagucuauguCgguu.....   | 3    | 1 | seq |
| .....uccguugGagucuauguuugguu.....   | 5    | 1 | seq |
| .....uccguugguGgucuauguuuggu.....   | 8    | 1 | seq |
| .....uccguugugagucuauguuuggAu.....  | 6    | 1 | seq |
| .....uccguugugagucuauguuuggGu.....  | 11   | 1 | seq |
| .....uccguugugagucGaguugguu.....    | 2    | 1 | seq |
| .....Cccguugugagucuauguuugguu.....  | 11   | 1 | seq |
| .....uccguugugaguUuaguugguu.....    | 1    | 1 | seq |
| .....uccguugugagucuaagAuuggu.....   | 1    | 1 | seq |
| .....uccguugugagucuaugugguu.....    | 1    | 1 | seq |
| .....Gccguugugagucuauguuuggu.....   | 2    | 1 | seq |
| .....uccguugugagucuaagCugguu.....   | 20   | 1 | seq |
| .....uccgAuugugagucuauguuugguu..... | 2    | 1 | seq |
| .....Accguugugagucuauguuugguu.....  | 4    | 1 | seq |
| .....uccguugugagucuaugAgguu.....    | 39   | 1 | seq |
| .....uccguugugagucuaagGuuggu.....   | 1    | 1 | seq |
| .....uccgCuugagucuauguuuggu.....    | 8    | 1 | seq |
| .....uccguuguaAucauguuugggu.....    | 2    | 1 | seq |
| .....uccguugugagucuauguuuggCu.....  | 99   | 1 | seq |
| .....Nccguugugagucuauguuugguu.....  | 2    | 1 | seq |
| .....uccguugugagAcuauguuugguu.....  | 2    | 1 | seq |
| .....uccguugugagucuauguuuggAu.....  | 82   | 1 | seq |
| .....uccguugugagucuauguuuAguu.....  | 1    | 1 | seq |
| .....uccguuuAuagucuauguuugguu.....  | 2    | 1 | seq |

**Mature**

Star

|                                                                                                                                   |      |   |     |
|-----------------------------------------------------------------------------------------------------------------------------------|------|---|-----|
| aaauaaauaaauuuugggcaaguucccgugugagucuaaguuuggguuaguuuacauugucugcucacacccgagagacccggguuuccaaauccugacaaacggaaguuaaaauaaauuuuuuguaag |      |   |     |
| .....uccgugugagucuaaguuugAuu.....                                                                                                 | 550  | 1 | seq |
| .....uccgugugagucuaaguuugAuua.....                                                                                                | 11   | 1 | seq |
| .....Cccgugugagucuaaguuugguu.....                                                                                                 | 5    | 1 | seq |
| .....uccgugugugucuaaguuugguu.....                                                                                                 | 3    | 1 | seq |
| .....uccgugugagucuaaguuagguu.....                                                                                                 | 16   | 1 | seq |
| .....uccUuuugugagucuaaguuugguu.....                                                                                               | 1    | 1 | seq |
| .....uccgugugCagucuaaguuugguu.....                                                                                                | 1    | 1 | seq |
| .....uccguAguagucuaaguuugguu.....                                                                                                 | 1    | 1 | seq |
| .....uccgugugaguguaaguuugguu.....                                                                                                 | 1    | 1 | seq |
| .....uccgugugagGcuaguuugguu.....                                                                                                  | 2    | 1 | seq |
| .....Nccgugugagucuaaguuugguu.....                                                                                                 | 2    | 1 | seq |
| .....uccgugugagucuaaguuugguuU.....                                                                                                | 9    | 1 | seq |
| .....Gccgugugagucuaaguuugguu.....                                                                                                 | 1    | 1 | seq |
| .....ucGgugugagucuaaguuugguu.....                                                                                                 | 1    | 1 | seq |
| .....uccgugugUgucuaaguuugguu.....                                                                                                 | 1    | 1 | seq |
| .....uccgugugagAcuaguuugguu.....                                                                                                  | 4    | 1 | seq |
| .....Accgugugagucuaaguuugguu.....                                                                                                 | 1    | 1 | seq |
| .....uccgugugagucuaaguuuggGu.....                                                                                                 | 3    | 1 | seq |
| .....uccgugugagCcuaguuugguu.....                                                                                                  | 4    | 1 | seq |
| .....uccgugugagucuaagCuggu.....                                                                                                   | 6    | 1 | seq |
| .....uccgugugagucuaaguuAgu.....                                                                                                   | 4    | 1 | seq |
| .....uccgugugagucucuguuugguu.....                                                                                                 | 1    | 1 | seq |
| .....uccguguguaAucuaaguuugguu.....                                                                                                | 1    | 1 | seq |
| .....uccgugugagucuaagAugguu.....                                                                                                  | 1    | 1 | seq |
| .....uccgugugagucuaaguuugguuG.....                                                                                                | 9    | 1 | seq |
| .....uccgCugagucuaaguuugguu.....                                                                                                  | 3    | 1 | seq |
| .....uccgugugagucuaaguuugguuC.....                                                                                                | 1    | 1 | seq |
| .....uccgugugaguuAuaaguuugguu.....                                                                                                | 1    | 1 | seq |
| .....uccgugugagucuaaguuugguuA.....                                                                                                | 1    | 1 | seq |
| .....uccgugugagucuaaguuuggGu.....                                                                                                 | 12   | 1 | seq |
| .....uccgugugaguuUuaaguuugguu.....                                                                                                | 3    | 1 | seq |
| .....uccgugugagucuaaguuugguu.....                                                                                                 | 1097 | 0 | seq |
| .....uccgugugagucucuguuugguu.....                                                                                                 | 1    | 1 | seq |
| .....uccgugugagucCaguuugguuag.....                                                                                                | 1    | 1 | seq |
| .....uccgAugagucuaaguuugguuag.....                                                                                                | 1    | 1 | seq |
| .....uccgugugugucuaaguuugguuag.....                                                                                               | 5    | 1 | seq |
| .....uccgugugagucuaaguuugAuag.....                                                                                                | 4    | 1 | seq |
| .....uccgugugagucuaagAugguuag.....                                                                                                | 1    | 1 | seq |
| .....uccgugugagucucuguuugguuag.....                                                                                               | 2    | 1 | seq |
| .....uccgugugagucucuguuugguuag.....                                                                                               | 4    | 1 | seq |
| .....uccgugugagucuaaguuuggCuag.....                                                                                               | 10   | 1 | seq |
| .....uccgugugagucuaaguuugguuGg.....                                                                                               | 8    | 1 | seq |
| .....uccgCugagucuaaguuugguuag.....                                                                                                | 4    | 1 | seq |
| .....Nccgugugagucuaaguuugguuag.....                                                                                               | 1    | 1 | seq |
| .....uccgugugagCcuaguuugguuag.....                                                                                                | 5    | 1 | seq |
| .....uccgugugagucAaguuugguuag.....                                                                                                | 2    | 1 | seq |
| .....Accgugugagucuaaguuugguuag.....                                                                                               | 3    | 1 | seq |
| .....uccgugugCagucuaaguuugguuag.....                                                                                              | 1    | 1 | seq |
| .....uccgugugagucuaaguuugguuac.....                                                                                               | 3    | 1 | seq |
| .....uccgugugagucuaaguuugguuUg.....                                                                                               | 4    | 1 | seq |
| .....uccguguuUuaagucuaaguuugguuag.....                                                                                            | 2    | 1 | seq |
| .....uccgugugagucuaagGuugguuag.....                                                                                               | 2    | 1 | seq |
| .....uccUuuugagucuaaguuugguuag.....                                                                                               | 1    | 1 | seq |
| .....uccgugugagucuaaguuugguuauU.....                                                                                              | 1    | 1 | seq |
| .....uccgugugagucuaaguuuggGuag.....                                                                                               | 1    | 1 | seq |
| .....uccgugugagucuaaguuaggGuag.....                                                                                               | 21   | 1 | seq |
| .....uccgugugagucuaaguuuAguuag.....                                                                                               | 2    | 1 | seq |
| .....uccgugugaguuUuaaguuugguuag.....                                                                                              | 1    | 1 | seq |
| .....uccgugugagAcuaguuugguuag.....                                                                                                | 1    | 1 | seq |
| .....uccgugugagucuaaguuCgguuag.....                                                                                               | 4    | 1 | seq |
| .....Gccgugugagucuaaguuugguuag.....                                                                                               | 1    | 1 | seq |
| .....uccgugugagucuaaguuugguuag.....                                                                                               | 1451 | 0 | seq |
| .....Cccgugugagucuaaguuugguuag.....                                                                                               | 5    | 1 | seq |
| .....uccgugugagucuaagCugguuag.....                                                                                                | 32   | 1 | seq |
| .....uccgugugagucuaaguuuggAuag.....                                                                                               | 2    | 1 | seq |
| .....uccgugugagucuaaguuugguuagC.....                                                                                              | 10   | 1 | seq |
| .....uccgugugugucuaaguuugguuaguu.....                                                                                             | 1    | 1 | seq |
| .....uccgugugagucuaaguuugguuaguu.....                                                                                             | 7    | 0 | seq |
| .....uccgugugagucuaaguuugguuagA.....                                                                                              | 72   | 1 | seq |
| .....uccgugugagucuaaguuugguuCagu.....                                                                                             | 5    | 1 | seq |

## Mature

## Star

[illegible]

|                             |      |   |     |
|-----------------------------|------|---|-----|
| uccguuguagucuaagCugguuagu   | 1    | 1 | seq |
| uccguuguagucuaaguugguuagGu  | 5    | 1 | seq |
| uccguuguagucuaaguugguuaguA  | 1    | 1 | seq |
| uccguuguagucuaaguugguuagGuu | 2    | 1 | seq |
| ccguugCagucuaaguug          | 3    | 1 | seq |
| ccguuguagucuaaguCg          | 15   | 1 | seq |
| ccguuguaAucuaaguug          | 4    | 1 | seq |
| Ncguuguagucuaaguug          | 2    | 1 | seq |
| ccguuguagGcuaguug           | 1    | 1 | seq |
| ccgCuguagucuaaguug          | 1    | 1 | seq |
| ccguuguagucuaaguGg          | 8    | 1 | seq |
| ccguuguagucuaaguug          | 1464 | 0 | seq |
| ccguuguagucuaaguuC          | 1    | 1 | seq |
| ccguuguagucuaaguAg          | 4    | 1 | seq |
| ccguuguagucuaaguA           | 54   | 1 | seq |
| ccguuguagucuaagCug          | 29   | 1 | seq |
| ccguugAagucuaaguug          | 1    | 1 | seq |
| ccguGguagucuaaguug          | 1    | 1 | seq |
| ccgAuguagucuaaguug          | 1    | 1 | seq |
| ccguuguagAcuaaguug          | 1    | 1 | seq |
| ccguuguagucuaagGug          | 2    | 1 | seq |
| cGguuguagucuaaguug          | 1    | 1 | seq |
| ccguuguGgucaaguug           | 3    | 1 | seq |
| ccguuguagucuaaguU           | 5    | 1 | seq |
| ccguuguCgucuaaguug          | 4    | 1 | seq |
| ccUuuguagucuaaguugg         | 2    | 1 | seq |
| ccguuguagucuaaguAgg         | 2    | 1 | seq |
| ccgCuguagucuaaguugg         | 9    | 1 | seq |
| ccguuguUgucaaguugg          | 1    | 1 | seq |
| ccCuuguagucuaaguugg         | 1    | 1 | seq |
| ccguuguagAcuaaguugg         | 1    | 1 | seq |
| ccguuguagucuaagGugg         | 1    | 1 | seq |
| Ncguuguagucuaaguugg         | 4    | 1 | seq |
| ccguuguagucuaagAugg         | 3    | 1 | seq |
| ccguuguagucuaaguCgg         | 7    | 1 | seq |
| ccguugGagucuaaguugg         | 2    | 1 | seq |
| ccgAuguagucuaaguugg         | 1    | 1 | seq |
| ccguuguCgucaaguugg          | 4    | 1 | seq |
| ccgGuguagucuaaguugg         | 2    | 1 | seq |
| ccguuguagucuaaguUggg        | 4    | 1 | seq |
| ccguugCagucuaaguugg         | 2    | 1 | seq |
| ccguuguaAucuaaguugg         | 2    | 1 | seq |
| ccguuguagucuaaguugg         | 1691 | 0 | seq |
| cGguuguagucuaaguugg         | 1    | 1 | seq |
| ccguuguaguUuaguugg          | 1    | 1 | seq |
| ccguuguagucuaaguUAg         | 6    | 1 | seq |
| ccguuguagucuaagCugg         | 9    | 1 | seq |
| ccguuguaguuGuaaguuggu       | 1    | 1 | seq |
| ccguugAagucuaaguuggu        | 1    | 1 | seq |
| ccguuguagucuaaguUAgu        | 1    | 1 | seq |
| ccguuguagucuaaguuggu        | 1885 | 0 | seq |
| ccUuuguagucuaaguuggu        | 1    | 1 | seq |
| ccguuguUgucaaguuggu         | 1    | 1 | seq |
| ccguuguagucuaaguugCu        | 1    | 1 | seq |
| ccguuguagucuaaguUAggu       | 7    | 1 | seq |
| ccguuguagucuaaguUgggu       | 2    | 1 | seq |
| ccgAuguagucuaaguuggu        | 2    | 1 | seq |
| ccguuguagucuaaguuggA        | 40   | 1 | seq |
| ccguuguCgucuaaguuggu        | 1    | 1 | seq |
| ccguuguagucuaaguCgggu       | 3    | 1 | seq |
| Ncguuguagucuaaguuggu        | 1    | 1 | seq |
| ccgCuguagucuaaguuggu        | 8    | 1 | seq |
| ccguuguagucuaaguuCgu        | 3    | 1 | seq |
| ccguuguGgucaaguuggu         | 3    | 1 | seq |
| ccguuguagucuaaguugAu        | 1    | 1 | seq |
| ccguugCagucuaaguuggu        | 3    | 1 | seq |
| ccguuguagucuaagCuggu        | 9    | 1 | seq |
| ccguuguagucuaaguuggC        | 504  | 1 | seq |
| ccguuAagucuaaguuggu         | 3    | 1 | seq |
| ccguuguagucuaaguugguu       | 174  | 0 | seq |

## Mature

## Star

aauuaaaauauuuuggcaguuuccgguugagucagugguuacuuucauuugucugucucacccgagagacccggggucaauuuccugacaacggaaguuaaaauauuuuuguag  
.....ccguuUuaguucuaguugguu.....  
.....ccguuguaagucuaaguAgguu.....  
.....ccguuguaagucuaagCugguu.....  
.....ccguuguaagucuaaguugAuu.....  
.....ccguuguaagucuaaguugguA.....  
.....ccguuguaagucuaaguuggCu.....  
.....ccgAuguaagucuaaguugguuA.....  
.....ccguuguaagucuaaguugguuA.....  
.....ccguuguaagucuaaguCgguuA.....  
.....ccguuguaagucuaaguuggguuU.....  
.....ccguugCagucuaaguugguuA.....  
.....ccguuguaagucuaaguAgguuag.....  
.....ccguuguaaguUuaguugguuag.....  
.....ccguuguaagucuaaguugguuAC.....  
.....ccguuguaagucUGguugguuag.....  
.....ccguuguaagAcuaaguugguuag.....  
.....ccguuguaagucuaaguugguuag.....  
.....ccguuguaagucuaaguCgguuag.....  
.....ccguuguaagucuaaguuggguuGg.....  
.....ccguuguaagucuaaguuggguagA.....  
.....ccguuguaagucuaaguuggguuagu.....  
.....ccguuguaagucuaaguugguCagu.....  
.....ccguuguaagucuaaguuggguagGu.....  
.....cguugUGucuaaguugg.....  
.....cgCugaagucuaaguugg.....  
.....cguuguaagucuaaguAgg.....  
.....Nguuguaagucuaaguugg.....  
.....cguuguaagucuaaguCgg.....  
.....cguuguaagucuaagAugg.....  
.....cguuguaagucuaaguugg.....  
.....cguugCagucuaaguugg.....  
.....cguuguaagucAaguugg.....  
.....cgAuguaagucuaaguugg.....  
.....cguuguaagucuCguugg.....  
.....cguuguaagucuaagCugg.....  
.....cguuguaagucuaaguGgg.....  
.....cguuguaagucuaaguuAg.....  
.....cgGugaagucuaaguugg.....  
.....cguugnuUgucuaaguugg.....  
.....cguuAuagucuaaguugg.....  
.....cguuguaagucuaaguugCu.....  
.....cguuguaagGcuaguuggu.....  
.....cguuguaagucGaguuggu.....  
.....cgAuguaagucuaaguuggu.....  
.....cguuguaagucuaaguuAgu.....  
.....cguuguaagucuaaguuggA.....  
.....cguuguaagucuaaguAggu.....  
.....cguuguaagucuaaguGgggu.....  
.....cguuAuagucuaaguuggu.....  
.....cguuguaagucuaagCuggu.....  
.....cgCugaagucuaaguuggu.....  
.....cguugnuGgucuaaguuggu.....  
.....cguuguaUucuaaguuggu.....  
.....cguuguaagucuaaguuggu.....  
.....cguugCagucuaaguuggu.....  
.....cguuguaagucuaaguugUu.....  
.....cguuguaagucuaaguuggC.....  
.....cguuguaagucuaaguuggCu.....  
.....cguuguaagucuaaguGgggu.....  
.....cguuguaagucuaaguugggu.....  
.....cguuguaagucuaagCugguuA.....  
.....cguuguaagucuaaguugguuA.....  
.....cguuguaagucuaaguugguuag.....  
.....cguuguaagucuaagCugguuag.....  
.....cguuguaagCcuaguugguuag.....  
.....cguuguaagucuaaguugguCagu.....  
.....guuguaagucuaaguuggC.....  
.....guAuguaagucuaaguuggu.....  
.....guuguaagucuaaguuggA.....  
.....guuguaagucuaagCuggu.....

## Mature

## Star

|                              |                    |                                         |                        |                |     |   |     |
|------------------------------|--------------------|-----------------------------------------|------------------------|----------------|-----|---|-----|
| auuuuaauauuuuuggcaguu        | uccgugugagucuaaguu | gguaguuucauuugucugucucacccgagagaccggguu | aaauccugacaaacgggaaguu | aaaauauuuuugua |     |   |     |
| .....guugua                  | gucua              | guuguu                                  |                        |                | 148 | 0 | seq |
| .....guugua                  | gucua              | guuu                                    |                        |                | 1   | 1 | seq |
| .....guugua                  | gucua              | guuu                                    |                        |                | 21  | 0 | seq |
| .....guugua                  | gucua              | guuuA                                   |                        |                | 1   | 1 | seq |
| .....gu                      | Gguagucua          | guuu                                    |                        |                | 1   | 1 | seq |
| .....gu                      | guagucua           | guuu                                    |                        |                | 4   | 0 | seq |
| .....gu                      | guagucua           | guuuag                                  |                        |                | 4   | 0 | seq |
| .....gu                      | guagucua           | guuuagGu                                |                        |                | 1   | 1 | seq |
| .....uu                      | guagucua           | guuu                                    |                        |                | 1   | 1 | seq |
| .....uu                      | guagucua           | guuuA                                   |                        |                | 2   | 1 | seq |
| .....uu                      | guagucua           | guuu                                    |                        |                | 70  | 0 | seq |
| .....u                       | guagucua           | guuu                                    |                        |                | 1   | 1 | seq |
| .....Gu                      | guagucua           | guuu                                    |                        |                | 1   | 1 | seq |
| .....uu                      | guu                | guaguu                                  |                        |                | 1   | 1 | seq |
| .....uu                      | guagucua           | guuu                                    |                        |                | 2   | 1 | seq |
| .....uu                      | guagucua           | guuu                                    |                        |                | 1   | 1 | seq |
| .....uu                      | guagucua           | guuu                                    |                        |                | 24  | 0 | seq |
| .....uu                      | guagucua           | guuuag                                  |                        |                | 28  | 0 | seq |
| .....uu                      | guagucua           | guuuAC                                  |                        |                | 1   | 1 | seq |
| .....uu                      | guagucua           | guuuag                                  |                        |                | 3   | 1 | seq |
| .....uu                      | guagucua           | guuuagGu                                |                        |                | 1   | 1 | seq |
| .....u                       | guagucua           | guuu                                    |                        |                | 3   | 0 | seq |
| .....u                       | guagucua           | guuu                                    |                        |                | 2   | 1 | seq |
| .....u                       | guagucua           | guuuag                                  |                        |                | 1   | 1 | seq |
| .....u                       | guagucua           | guuuag                                  |                        |                | 19  | 0 | seq |
| .....u                       | guagucua           | guuuagu                                 |                        |                | 1   | 0 | seq |
| .....u                       | guagucua           | guuuCagu                                |                        |                | 1   | 1 | seq |
| .....u                       | guagucua           | guuuag                                  |                        |                | 1   | 0 | seq |
| .....gcucucacccgagagaccggg   |                    |                                         |                        |                | 1   | 0 | seq |
| .....gcucucacccgagagaccgggu  |                    |                                         |                        |                | 1   | 0 | seq |
| .....cucucacccgagagaccggg    |                    |                                         |                        |                | 1   | 0 | seq |
| .....cucucacccgagagaccggg    |                    |                                         |                        |                | 1   | 0 | seq |
| .....cucucacccgagagaccgAgg   |                    |                                         |                        |                | 1   | 1 | seq |
| .....cucucacccgagagaccgggu   |                    |                                         |                        |                | 2   | 0 | seq |
| .....cucCcacccgagagaccgggu   |                    |                                         |                        |                | 1   | 1 | seq |
| .....cucucacccgGgagaccgggu   |                    |                                         |                        |                | 1   | 1 | seq |
| .....cucucacccgagagaccggguu  |                    |                                         |                        |                | 1   | 0 | seq |
| .....cucucacccgagagaccggguC  |                    |                                         |                        |                | 1   | 1 | seq |
| .....cucucacccgagagaccggguuc |                    |                                         |                        |                | 2   | 0 | seq |
| .....ucucacccgagagaccgg      |                    |                                         |                        |                | 3   | 0 | seq |
| .....ucucacccgagagaccggg     |                    |                                         |                        |                | 3   | 0 | seq |
| .....ucucacccgagagaccgggg    |                    |                                         |                        |                | 2   | 0 | seq |
| .....ucucacccgagagaccggggC   |                    |                                         |                        |                | 1   | 1 | seq |
| .....ucucacccgagagaccgggu    |                    |                                         |                        |                | 2   | 0 | seq |
| .....ucucaUccgagagaccgggu    |                    |                                         |                        |                | 1   | 1 | seq |
| .....cucacccgagagaccgg       |                    |                                         |                        |                | 20  | 0 | seq |
| .....cucacccgagagaccC        |                    |                                         |                        |                | 1   | 1 | seq |
| .....cucacccgagagaccggg      |                    |                                         |                        |                | 13  | 0 | seq |
| .....cucacccgagagaccgggC     |                    |                                         |                        |                | 1   | 1 | seq |
| .....cucacccgagagaccgggA     |                    |                                         |                        |                | 1   | 1 | seq |
| .....cucacccgagagaccgggg     |                    |                                         |                        |                | 11  | 0 | seq |
| .....cucaUccgagagaccgggu     |                    |                                         |                        |                | 1   | 1 | seq |
| .....cucacccgagagaccgggu     |                    |                                         |                        |                | 52  | 0 | seq |
| .....cucacccgagagGccccgggu   |                    |                                         |                        |                | 1   | 1 | seq |
| .....cucacccgagagaccggggC    |                    |                                         |                        |                | 6   | 1 | seq |
| .....cucacccgagagaccggggG    |                    |                                         |                        |                | 1   | 1 | seq |
| .....cucacccgagagaccgggguu   |                    |                                         |                        |                | 3   | 0 | seq |
| .....cucacccgagagaccgggguC   |                    |                                         |                        |                | 1   | 1 | seq |
| .....cucacccgagagaccgggguuc  |                    |                                         |                        |                | 1   | 0 | seq |
| .....cucaUccgagagaccgggguuc  |                    |                                         |                        |                | 1   | 1 | seq |
| .....ucacccgagagaccggg       |                    |                                         |                        |                | 5   | 0 | seq |
| .....ucacccgagagaccgggg      |                    |                                         |                        |                | 6   | 0 | seq |
| .....Ccacccgagagaccgggu      |                    |                                         |                        |                | 1   | 1 | seq |
| .....ucacccgagagaccgggu      |                    |                                         |                        |                | 2   | 0 | seq |
| .....ucacccgagagaccgggAu     |                    |                                         |                        |                | 1   | 1 | seq |
| .....Acacccgagagaccgggguuc   |                    |                                         |                        |                | 1   | 1 | seq |
| .....ucaUccgagagaccgggguuc   |                    |                                         |                        |                | 1   | 1 | seq |
| .....ucaUccgagagaccgggguuc   |                    |                                         |                        |                | 2   | 1 | seq |
| .....caccggagagaccgggC       |                    |                                         |                        |                | 1   | 1 | seq |
| .....caccggagagaccgggg       |                    |                                         |                        |                | 1   | 0 | seq |



## Mature

Star

|                                 |     |   |     |
|---------------------------------|-----|---|-----|
| .....cacccgagagacccggA.....     | 1   | 1 | seq |
| .....caUccgagagacccgggu.....    | 1   | 1 | seq |
| .....cacccgagagacccgggu.....    | 2   | 0 | seq |
| .....caUccgagagacccggguu.....   | 1   | 1 | seq |
| .....cacccgagagacccggguuc.....  | 1   | 0 | seq |
| .....caUccgagagacccggguuc.....  | 34  | 1 | seq |
| .....caUccgagagacccggguuca..... | 2   | 1 | seq |
| .....acccgagagUcccggggu.....    | 1   | 1 | seq |
| .....aAaccgagagacccgggu.....    | 1   | 1 | seq |
| .....aUccgagagacccgggu.....     | 2   | 1 | seq |
| .....aUccgagagacccggguuc.....   | 6   | 1 | seq |
| .....cccgagagacccggguu.....     | 9   | 0 | seq |
| .....cccgagagacccAgguu.....     | 1   | 1 | seq |
| .....cccgagagacccggguC.....     | 2   | 1 | seq |
| .....cccgagagacccggguuU.....    | 3   | 1 | seq |
| .....cccgagagacccggguuA.....    | 1   | 1 | seq |
| .....cccUagagacccggguuc.....    | 1   | 1 | seq |
| .....cccgagagacccgggGuc.....    | 1   | 1 | seq |
| .....cccgagagacUcgggguuc.....   | 1   | 1 | seq |
| .....cccgagagacccggguGc.....    | 1   | 1 | seq |
| .....cccgagagacccUggguuc.....   | 1   | 1 | seq |
| .....cccgagagacccAgguuc.....    | 2   | 1 | seq |
| .....Uccgagagacccggguuc.....    | 8   | 1 | seq |
| .....cccgagagacccggguuc.....    | 58  | 0 | seq |
| .....cccgagagacccggguCc.....    | 1   | 1 | seq |
| .....cccgagagacccggguuca.....   | 8   | 0 | seq |
| .....ccgGgagacccggguuc.....     | 1   | 1 | seq |
| .....ccgagagacccggguuU.....     | 29  | 1 | seq |
| .....ccgagagacccggguGc.....     | 4   | 1 | seq |
| .....ccgagagacccggguCc.....     | 7   | 1 | seq |
| .....ccgagagacccggguuc.....     | 758 | 0 | seq |
| .....ccgagagacAaggguuc.....     | 1   | 1 | seq |
| .....ccgagagaGccggguuc.....     | 2   | 1 | seq |
| .....ccgagGgacccggguuc.....     | 2   | 1 | seq |
| .....ccgagagacccggguAc.....     | 1   | 1 | seq |
| .....ccgagagacccAgguuc.....     | 2   | 1 | seq |
| .....ccgagagacccgggGuc.....     | 2   | 1 | seq |
| .....Ncgagagacccggguuc.....     | 1   | 1 | seq |
| .....ccgagagacccgggCuc.....     | 1   | 1 | seq |
| .....ccgagagacccgggAuc.....     | 2   | 1 | seq |
| .....ccgagagacccUggguuc.....    | 2   | 1 | seq |
| .....ccgagUgacccggguuc.....     | 1   | 1 | seq |
| .....Acgagagacccggguuc.....     | 1   | 1 | seq |
| .....ccgagagacUcgggguuc.....    | 1   | 1 | seq |
| .....ccgagagacccGggguuc.....    | 3   | 1 | seq |
| .....ccgagagGcccggguuc.....     | 1   | 1 | seq |
| .....ccgagagacccggguuA.....     | 8   | 1 | seq |
| .....ccgagagacccggguuca.....    | 63  | 0 | seq |
| .....ccgagagacccggguucU.....    | 1   | 1 | seq |
| .....ccgagagacccgggGuca.....    | 1   | 1 | seq |
| .....ccgagagacccUggguuca.....   | 1   | 1 | seq |
| .....cgagagacccggguuca.....     | 295 | 0 | seq |
| .....cgaUagacccggguuca.....     | 1   | 1 | seq |
| .....cgagagacccggguucC.....     | 2   | 1 | seq |
| .....cgagagacUcgggguuca.....    | 1   | 1 | seq |
| .....cgagagacccgggGuca.....     | 1   | 1 | seq |
| .....cgagagacccggguucU.....     | 2   | 1 | seq |
| .....cgagGgacccggguuca.....     | 3   | 1 | seq |
| .....cgagagacccggguuGa.....     | 1   | 1 | seq |
| .....cgagagacccggguCca.....     | 2   | 1 | seq |
| .....Ggagagacccggguuca.....     | 1   | 1 | seq |
| .....cgagagacccgggCuca.....     | 1   | 1 | seq |
| .....cgagagGcccggguuca.....     | 1   | 1 | seq |
| .....cgagagacccggguucaG.....    | 1   | 1 | seq |

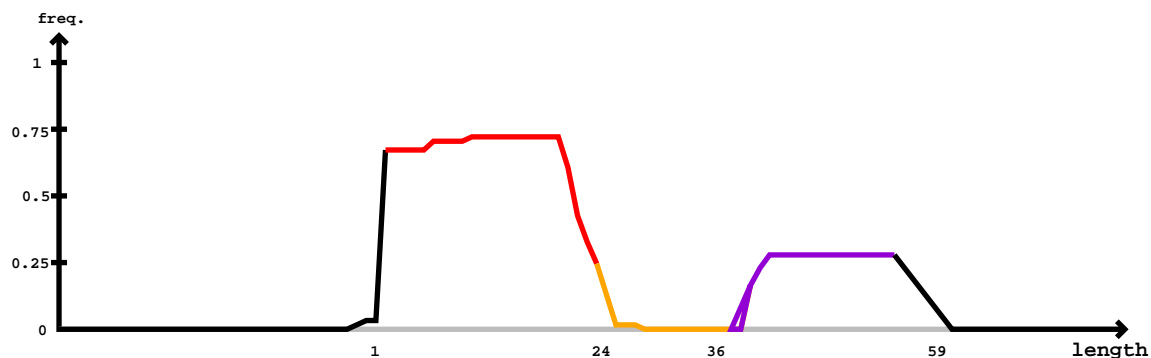

Star

|     |                                                                                                                    |       |     |
|-----|--------------------------------------------------------------------------------------------------------------------|-------|-----|
| 5'- | gauauugaucuguuugucugguaauugcauauugccuacuagagaacuggaugauuucgugaauugguuuucguuucaguuccguuggaggcagagagauacagaucccuguuu | -3'   | obs |
|     | gauauugaucuguuugucugguaauugcauauugccuacuagagaacuggaugauuucgugaauugguuuucguuucaguuccguuggaggcagagagauacagaucccuguuu |       | exp |
|     | (((((..((((((...(((.....((((((((((((((((((((((((....)))..)))))))).)))))))).))))).))))).                            | reads | mm  |
|     | .....auugccuUcuagagaacuggaugauu.....                                                                               | 1     | 1   |
|     | .....UCgccuacuagagaacuggaugau.....                                                                                 | 1     | 1   |
|     | .....gccuUcuagagaacuggau.....                                                                                      | 7     | 1   |
|     | .....gccuUcuagagaacuggaug.....                                                                                     | 11    | 1   |
|     | .....gccuUcuagagaacuggauga.....                                                                                    | 6     | 1   |
|     | .....gccuUcuagagaacuggaugau.....                                                                                   | 4     | 1   |
|     | .....gccuUcuagagaacuggaugauu.....                                                                                  | 11    | 1   |
|     | .....cuagagaacuggaugauu.....                                                                                       | 2     | 0   |
|     | .....agaacuggaugauucgcG.....                                                                                       | 1     | 1   |
|     | .....uucaguuccguuggaggU.....                                                                                       | 1     | 1   |
|     | .....uucaguuccguuggaggc.....                                                                                       | 1     | 0   |
|     | .....uucaguuccguuggaggca.....                                                                                      | 8     | 0   |
|     | .....ucaguuccguuggaggU.....                                                                                        | 1     | 1   |
|     | .....ucaguuccguuggaggc.....                                                                                        | 1     | 0   |
|     | .....ucaguuccguuggaggca.....                                                                                       | 2     | 0   |
|     | .....caguuccguuggaggca.....                                                                                        | 3     | 0   |
|     |                                                                                                                    |       | seq |

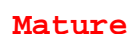[illegible]

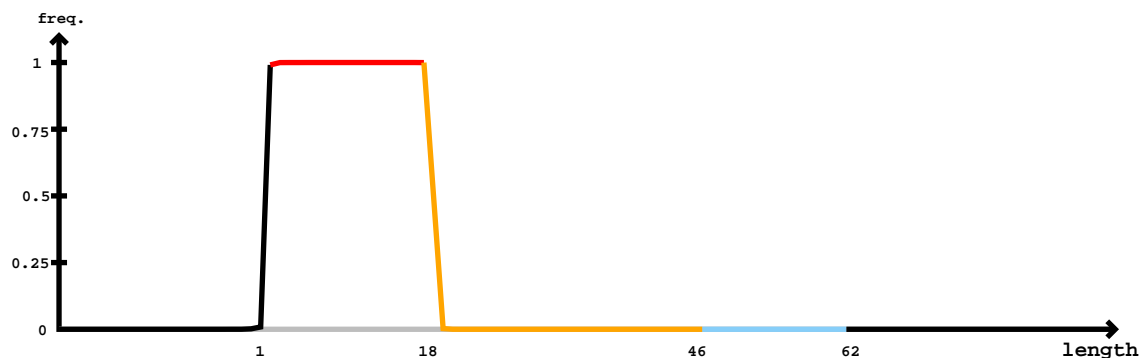

Star

## Mature

## Star

|                                 |                    |                  |            |                    |                              |  |  |  |
|---------------------------------|--------------------|------------------|------------|--------------------|------------------------------|--|--|--|
| uggaguauaucacaacagug            | ugagaacuuugaagacua | uggggggcacucuccu | uggugccuaa | ugucuuuccagugacaua | cugugacauagauccacauuuauucuuc |  |  |  |
| .....Ggagaacuuugaagacu.....     | 80                 | 1                | seq        |                    |                              |  |  |  |
| .....ugCgaacuuugaagacu.....     | 8                  | 1                | seq        |                    |                              |  |  |  |
| .....ugagaacuuugaGgacu.....     | 219                | 1                | seq        |                    |                              |  |  |  |
| .....ugagaacGuugaagacu.....     | 5                  | 1                | seq        |                    |                              |  |  |  |
| .....ugagaacuuCgaagacu.....     | 122                | 1                | seq        |                    |                              |  |  |  |
| .....ugagaacuuugaagacu.....     | 52535              | 0                | seq        |                    |                              |  |  |  |
| .....ugagaacuuugCagacu.....     | 4                  | 1                | seq        |                    |                              |  |  |  |
| .....ugagaacuuugaCgacu.....     | 10                 | 1                | seq        |                    |                              |  |  |  |
| .....ugagaacuuuCaagacu.....     | 9                  | 1                | seq        |                    |                              |  |  |  |
| .....uNagaacuuugaagacu.....     | 1                  | 1                | seq        |                    |                              |  |  |  |
| .....ugagaacuuuUaagacu.....     | 8                  | 1                | seq        |                    |                              |  |  |  |
| .....uAagaacuuugaagacu.....     | 34                 | 1                | seq        |                    |                              |  |  |  |
| .....Ngagaacuuugaagacu.....     | 64                 | 1                | seq        |                    |                              |  |  |  |
| .....uUagaacuuugaagacu.....     | 26                 | 1                | seq        |                    |                              |  |  |  |
| .....uCagaacuuugaagacu.....     | 2                  | 1                | seq        |                    |                              |  |  |  |
| .....ugagGacuugaagacua.....     | 17                 | 1                | seq        |                    |                              |  |  |  |
| .....uAagaacuuugaagacua.....    | 4                  | 1                | seq        |                    |                              |  |  |  |
| .....ugagaacuuugaUgacua.....    | 3                  | 1                | seq        |                    |                              |  |  |  |
| .....ugagaacuuugaGgacua.....    | 20                 | 1                | seq        |                    |                              |  |  |  |
| .....Ngagaacuuugaagacua.....    | 4                  | 1                | seq        |                    |                              |  |  |  |
| .....ugagaGcuugaagacua.....     | 9                  | 1                | seq        |                    |                              |  |  |  |
| .....ugagaacuuugaagacua.....    | 3913               | 0                | seq        |                    |                              |  |  |  |
| .....ugagaacuuugGagacua.....    | 23                 | 1                | seq        |                    |                              |  |  |  |
| .....ugUgaacuuugaagacua.....    | 2                  | 1                | seq        |                    |                              |  |  |  |
| .....ugagCacuugaagacua.....     | 3                  | 1                | seq        |                    |                              |  |  |  |
| .....ugagaacuuugaagacGa.....    | 21                 | 1                | seq        |                    |                              |  |  |  |
| .....uUagaacuuugaagacua.....    | 2                  | 1                | seq        |                    |                              |  |  |  |
| .....ugagaacuuuCaagacua.....    | 1                  | 1                | seq        |                    |                              |  |  |  |
| .....ugaUaacuuugaagacua.....    | 1                  | 1                | seq        |                    |                              |  |  |  |
| .....ugagaacuuGugaagacua.....   | 1                  | 1                | seq        |                    |                              |  |  |  |
| .....ugagaacuuuUaagacua.....    | 1                  | 1                | seq        |                    |                              |  |  |  |
| .....ugagaacuuugaaAacua.....    | 1                  | 1                | seq        |                    |                              |  |  |  |
| .....ugaCaacuuugaagacua.....    | 2                  | 1                | seq        |                    |                              |  |  |  |
| .....ugagaacAuugaagacua.....    | 1                  | 1                | seq        |                    |                              |  |  |  |
| .....ugagaacuuCgaagacua.....    | 7                  | 1                | seq        |                    |                              |  |  |  |
| .....Cgagaacuuugaagacua.....    | 7                  | 1                | seq        |                    |                              |  |  |  |
| .....Ggagaacuuugaagacua.....    | 7                  | 1                | seq        |                    |                              |  |  |  |
| .....ugagaacuuugaagacCa.....    | 53                 | 1                | seq        |                    |                              |  |  |  |
| .....ugGgaacuuugaagacua.....    | 16                 | 1                | seq        |                    |                              |  |  |  |
| .....ugagaacuuugaagacuaG.....   | 2                  | 1                | seq        |                    |                              |  |  |  |
| .....ugagaacuuugaagacuGu.....   | 106                | 1                | seq        |                    |                              |  |  |  |
| .....ugagaacuuugaagacuau.....   | 1                  | 0                | seq        |                    |                              |  |  |  |
| .....ugagaacuuugaagacGau.....   | 1                  | 1                | seq        |                    |                              |  |  |  |
| .....ugagaacuuugaagacuauA.....  | 1                  | 1                | seq        |                    |                              |  |  |  |
| .....ugagaacuuugaagacuGug.....  | 1                  | 1                | seq        |                    |                              |  |  |  |
| .....gagaacuuugaGgacua.....     | 3                  | 1                | seq        |                    |                              |  |  |  |
| .....gagGacuugaagacua.....      | 2                  | 1                | seq        |                    |                              |  |  |  |
| .....gGgaacuuugaagacua.....     | 1                  | 1                | seq        |                    |                              |  |  |  |
| .....gagaacuuugaagacCa.....     | 6                  | 1                | seq        |                    |                              |  |  |  |
| .....gagaacuuugGagacua.....     | 1                  | 1                | seq        |                    |                              |  |  |  |
| .....gagaacuuugaagacGa.....     | 3                  | 1                | seq        |                    |                              |  |  |  |
| .....gagaCcuugaagacua.....      | 1                  | 1                | seq        |                    |                              |  |  |  |
| .....gagaGcuugaagacua.....      | 1                  | 1                | seq        |                    |                              |  |  |  |
| .....gagaacuuugaagacua.....     | 467                | 0                | seq        |                    |                              |  |  |  |
| .....Nagaacuuugaagacua.....     | 1                  | 1                | seq        |                    |                              |  |  |  |
| .....Cagaacuuugaagacua.....     | 1                  | 1                | seq        |                    |                              |  |  |  |
| .....gagaacuuugaagacuGu.....    | 23                 | 1                | seq        |                    |                              |  |  |  |
| .....agaacuuugaagacuGu.....     | 15                 | 1                | seq        |                    |                              |  |  |  |
| .....aaAuugaagacuaugg.....      | 1                  | 1                | seq        |                    |                              |  |  |  |
| .....acuugaagacuGugggg.....     | 1                  | 1                | seq        |                    |                              |  |  |  |
| .....acugugacauagauccacauu..... | 1                  | 0                | seq        |                    |                              |  |  |  |

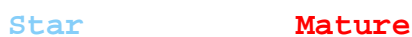

| 5'                                                                            | gaucccucaaaaauccagaaaaacuaguggagcaugaguug <u>uauccagcucuaaauagauuguuaaccaauuuagaauagagugggagcc</u> aacucacuuuaagaugggaaag | -3' | exp |        |  |
|-------------------------------------------------------------------------------|---------------------------------------------------------------------------------------------------------------------------|-----|-----|--------|--|
| ..(((.(....(((.(.....))))).(((((((.((((.(.....)))))).))))).))))).))))).)))).. | reads                                                                                                                     | mm  |     | sample |  |
| .....uGuagaauagagugggagc.....                                                 | 2                                                                                                                         | 1   |     | seq    |  |
| .....uGuagaauagagugggagcc.....                                                | 5                                                                                                                         | 1   |     | seq    |  |
| .....uuuagaauuAagugggagcc.....                                                | 5                                                                                                                         | 1   |     | seq    |  |
| .....uGuagaauagagugggagcca.....                                               | 4                                                                                                                         | 1   |     | seq    |  |
| .....Guagaauagagugggagcc.....                                                 | 1                                                                                                                         | 1   |     | seq    |  |
| .....uagaauagagugggagcc.....                                                  | 2                                                                                                                         | 0   |     | seq    |  |
| .....uagaauaAugggagcc.....                                                    | 1                                                                                                                         | 1   |     | seq    |  |
| .....uagaauagagugggagccG.....                                                 | 9                                                                                                                         | 1   |     | seq    |  |
| .....uagaauagagugggagcca.....                                                 | 5                                                                                                                         | 0   |     | seq    |  |
| .....uagaauagagugggagccU.....                                                 | 2                                                                                                                         | 1   |     | seq    |  |

Provisional ID : MA\_156628\_7498  
Score total : 0  
Score for star read(s) : -1.3  
Score for read counts : 0  
Score for mfe : -0.2  
Score for randfold : 1.6  
Score for cons. seed :  
Total read count : 5323  
Mature read count : 5312  
Loop read count : 11  
Star read count : 0

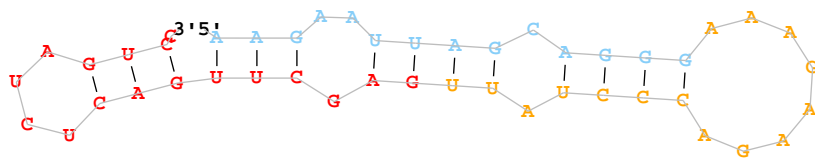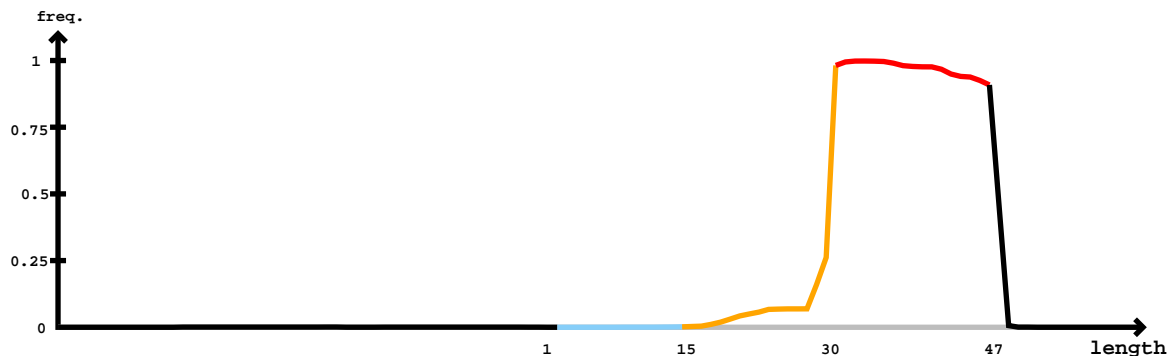

## Star Mature

| 5'                                                                  |                                                 | -3'   | exp |        |
|---------------------------------------------------------------------|-------------------------------------------------|-------|-----|--------|
| cugucccuagauacuaucuaagagaaacuaaccaaggggaugggcuuggaagaauuagcaggg     | aaagaagaccuauuagagcuugacucuaaguccuaaccuaucauagu | reads | mm  | sample |
| ...(((.....))).....(((.....(((.....(((.....))).....))).....)))..... |                                                 | 4     | 1   | seq    |
| .....uacuaucuaagCgaaacu.....                                        |                                                 | 1     | 1   | seq    |
| .....cuacauccaagggaaCgggcu.....                                     |                                                 | 2     | 0   | seq    |
| .....ccaaggggaugggcuug.....                                         |                                                 | 2     | 0   | seq    |
| .....agcaggggaagaagacc.....                                         |                                                 | 1     | 1   | seq    |
| .....gggaaagaagaccuCu.....                                          |                                                 | 1     | 0   | seq    |
| .....gggaaagaagaccuauuagagcuugacucu.....                            |                                                 | 1     | 1   | seq    |
| .....ggaagaagaccuauuagagcuugacuc.....                               |                                                 | 1     | 0   | seq    |
| .....gaaagaagaccuauuagagcuugacucCa.....                             |                                                 | 1     | 1   | seq    |
| .....gaaagaagaccuauuagagcuugacucuaaguc.....                         |                                                 | 1     | 0   | seq    |
| .....aaagaagaccuauuagagcuugacuc.....                                |                                                 | 1     | 1   | seq    |
| .....aaagaagaccuauuagagcuug.....                                    |                                                 | 2     | 0   | seq    |
| .....aaagaagaccuauuagagcuugacucuaagu.....                           |                                                 | 1     | 0   | seq    |
| .....aagaagaccuCuugagcu.....                                        |                                                 | 1     | 1   | seq    |
| .....aagaagaccuauuagagcuu.....                                      |                                                 | 3     | 0   | seq    |
| .....aagaagaccuauuagagcuug.....                                     |                                                 | 2     | 0   | seq    |
| .....aagaagaccuauuagagcuugacucu.....                                |                                                 | 5     | 0   | seq    |
| .....agaagaccuauuagagU.....                                         |                                                 | 2     | 1   | seq    |
| .....agaagaccuauuagagc.....                                         |                                                 | 1     | 0   | seq    |
| .....agaagaccuauuagagcu.....                                        |                                                 | 1     | 0   | seq    |
| .....agaagaccuauuagagcuu.....                                       |                                                 | 4     | 0   | seq    |
| .....agaagaccuauuagagcuC.....                                       |                                                 | 2     | 1   | seq    |
| .....agaagaccuCuugagcuug.....                                       |                                                 | 1     | 1   | seq    |
| .....agaagaccuauuagagcuug.....                                      |                                                 | 7     | 0   | seq    |
| .....agaagaccuauuagagcuuA.....                                      |                                                 | 1     | 1   | seq    |
| .....agaagaccuCuugagcuuga.....                                      |                                                 | 1     | 1   | seq    |
| .....agaagaccuauuagagcuugacuU.....                                  |                                                 | 1     | 1   | seq    |
| .....agaagaccuauuagagcuugacucu.....                                 |                                                 | 6     | 0   | seq    |
| .....agaagaccuCuugagcuugacucu.....                                  |                                                 | 2     | 1   | seq    |
| .....agaagaccuCuugagcuugacucua.....                                 |                                                 | 1     | 1   | seq    |
| .....agaagaccuauuagagcuugacucua.....                                |                                                 | 2     | 0   | seq    |
| .....agaagaccuauuagagcuugacucuaag.....                              |                                                 | 1     | 0   | seq    |
| .....agaagaccuauuagagcuugacucuaagu.....                             |                                                 | 2     | 0   | seq    |

## Star

## Mature

cugucccuagauacuaucuaagagaacacauccaagggaaugggcuuggaagaauuagcagggaaagaagaccuuuagagcuugacucuaaguccuaacccauucauagu

|                                            |    |   |     |
|--------------------------------------------|----|---|-----|
| .....agaagaccuuuagagcuugacucuaaguc.....    | 1  | 0 | seq |
| .....agaagaccuuuagagcuugacucuaaguccGa..... | 2  | 1 | seq |
| .....gaagaccuuuagagcu.....                 | 3  | 0 | seq |
| .....gaagaccuuuagagcC.....                 | 1  | 1 | seq |
| .....gaagaccuuuagGgcu.....                 | 1  | 1 | seq |
| .....gaagaccuuuagagcuC.....                | 1  | 1 | seq |
| .....gaagaccuuuagagcuu.....                | 5  | 0 | seq |
| .....gaagaccuuuagagcuug.....               | 9  | 0 | seq |
| .....gaagaccuuuagagcuGg.....               | 1  | 1 | seq |
| .....gaagaccuuuagagcuuga.....              | 1  | 0 | seq |
| .....gaagaccuuuagagcuugac.....             | 1  | 0 | seq |
| .....gaagaccuuuagagcuugacuc.....           | 3  | 0 | seq |
| .....gaagaccuuuagagcuugacucu.....          | 2  | 1 | seq |
| .....gaagaccuuuagagcuugacucu.....          | 7  | 0 | seq |
| .....gaagaccuuuagagcuugacucua.....         | 7  | 0 | seq |
| .....gaagaccuuuagagcuugacucuaagu.....      | 2  | 0 | seq |
| .....gaGgaccuuuagagcuugacucuaagu.....      | 1  | 1 | seq |
| .....gaagaccuuuagagcuugacucuaaguc.....     | 1  | 0 | seq |
| .....gaagaccuuuagagcuugacucuaagucc.....    | 1  | 0 | seq |
| .....gaagaccuuuagagcuugacucuaaguccGa.....  | 1  | 1 | seq |
| .....aagaccuuuagagcuC.....                 | 1  | 1 | seq |
| .....aagaccuuuagagcuu.....                 | 17 | 0 | seq |
| .....aagaccuuuagagcuu.....                 | 2  | 1 | seq |
| .....aagaccuuuagagcuug.....                | 16 | 0 | seq |
| .....aagaccuuuagagcuuga.....               | 3  | 0 | seq |
| .....aagaccuuuagagcuugacuc.....            | 6  | 0 | seq |
| .....aagaccuuuagagcuugacuc.....            | 1  | 1 | seq |
| .....aagaccuuuagagcCugacucu.....           | 1  | 1 | seq |
| .....aagaccuuuagagcuugacucu.....           | 1  | 1 | seq |
| .....aagaccuuuagagcuugacucu.....           | 5  | 0 | seq |
| .....aagaccuuuagagcuugacucu.....           | 2  | 1 | seq |
| .....aagaccuuuagagcuugacucA.....           | 1  | 1 | seq |
| .....aagaccuuuagagcuugacucC.....           | 2  | 1 | seq |
| .....aagaccuuuagagcuugacucua.....          | 3  | 0 | seq |
| .....aagaccuuuagagcuugacucua.....          | 1  | 1 | seq |
| .....aagaccuuuagagcuugacucuaag.....        | 1  | 0 | seq |
| .....aagaccuuuagagcuugacucuaagu.....       | 1  | 0 | seq |
| .....aagaccuuuagagcuugacucuaaguccGa.....   | 1  | 1 | seq |
| .....agaccuuuagagcuug.....                 | 13 | 0 | seq |
| .....agaccuuuagagcuuga.....                | 7  | 0 | seq |
| .....agaccuuuagagcuugac.....               | 3  | 0 | seq |
| .....agaccuuuagagcuugacuU.....             | 2  | 1 | seq |
| .....agaccuuuagagcuugacuc.....             | 7  | 0 | seq |
| .....agaccuuuagagcuugacucC.....            | 3  | 1 | seq |
| .....agaccuuuagagcuugacucu.....            | 1  | 1 | seq |
| .....agaccuuuagagcuugaAucu.....            | 1  | 1 | seq |
| .....agaccuuuagagcuugacucu.....            | 13 | 0 | seq |
| .....agaccuuuagagcuugacucua.....           | 7  | 0 | seq |
| .....agaccuuuagagcuugacucuaag.....         | 3  | 0 | seq |
| .....agaccuuuagagcuugacucuaagC.....        | 1  | 1 | seq |
| .....agaccuuuagagcuugacucuaagu.....        | 3  | 0 | seq |
| .....agaccuuuagagcuugacucuaaguc.....       | 2  | 0 | seq |
| .....agaccuuuagagcuugacucuaagucc.....      | 2  | 1 | seq |
| .....gaccuuuagagcuuga.....                 | 5  | 0 | seq |
| .....gaccuuuagagcuugac.....                | 2  | 0 | seq |
| .....gaccuuuagagcuugac.....                | 1  | 1 | seq |
| .....gaccuuuagagcuugacuc.....              | 1  | 0 | seq |
| .....gaccuuuagagcuugacuA.....              | 1  | 1 | seq |
| .....gaccuuuagagcuugacucu.....             | 1  | 1 | seq |
| .....gaccuuuagagcuugacucu.....             | 9  | 0 | seq |
| .....gaccuuuagagcuGgacucu.....             | 1  | 1 | seq |
| .....gaccuuuagagcuugacucC.....             | 4  | 1 | seq |
| .....gaccuuuagagcuugacucua.....            | 1  | 1 | seq |
| .....gaccuuuagagcuugacucua.....            | 5  | 0 | seq |
| .....gaccuuuagagcuCgacucua.....            | 1  | 1 | seq |
| .....gaccuuuagagcuugacucuaag.....          | 3  | 0 | seq |
| .....gaccuuuagagcuugacucuaagu.....         | 2  | 0 | seq |
| .....gaccuuuagagcuugacucuaagu.....         | 1  | 1 | seq |
| .....gaccuuuagagcuugacucuaagC.....         | 1  | 1 | seq |
| .....gaccuuuagagcuugacucuaagucc.....       | 2  | 0 | seq |



## Star

## Mature

cugucccuagauacuaucuaagagaacacauccaaggggaugggcuuggaagaauuagcagggaaagaagaccuauuagagcuugacucuaaguccaaacccauucauagu

|                                       |     |   |     |
|---------------------------------------|-----|---|-----|
| .....gacccuUuugagcuugacucuaagucc..... | 1   | 1 | seq |
| .....accuauuagagcuugac.....           | 1   | 0 | seq |
| .....accuauuagagcuugacu.....          | 1   | 0 | seq |
| .....accuauuagagcuugacuc.....         | 6   | 0 | seq |
| .....accuCuugagcuugacuc.....          | 1   | 1 | seq |
| .....accuauuagagcuugacucA.....        | 1   | 1 | seq |
| .....accuauuagagcuugacucu.....        | 14  | 0 | seq |
| .....accuauuagagcuugacucC.....        | 1   | 1 | seq |
| .....accuauuagagcuugacucua.....       | 6   | 0 | seq |
| .....accuauuagagcuugacucuaag.....     | 4   | 0 | seq |
| .....accuauuagagcuugacucuaagu.....    | 4   | 0 | seq |
| .....accuauuagagcuugacucuaagucc.....  | 1   | 0 | seq |
| .....cccuauuagagcuugacuc.....         | 17  | 0 | seq |
| .....cccuCuugagcuugacuc.....          | 1   | 1 | seq |
| .....cccuauuagagcuuUacuc.....         | 1   | 1 | seq |
| .....cccuCuagagcuugacuc.....          | 1   | 1 | seq |
| .....cccuauuagagcAugacucu.....        | 1   | 1 | seq |
| .....cccuauuagagcuugacucu.....        | 13  | 0 | seq |
| .....cccuauuagagUuugacucu.....        | 1   | 1 | seq |
| .....cccuauuagagcuugacCcu.....        | 1   | 1 | seq |
| .....cccuCuugagcuugacucua.....        | 1   | 1 | seq |
| .....cccuauuagagcuugacucua.....       | 11  | 0 | seq |
| .....cccuauuagagcCugacucua.....       | 1   | 1 | seq |
| .....cccuauuagagcuugacucuaag.....     | 1   | 0 | seq |
| .....cccuauuagagcuugacucuaagu.....    | 5   | 0 | seq |
| .....cccuauuagagcuugacucuaaguc.....   | 1   | 0 | seq |
| .....cccuauuagagcuugacucuaagucc.....  | 1   | 0 | seq |
| .....cccuUuugagcuugacucuaagucc.....   | 1   | 1 | seq |
| .....ccuauuagagcuugacuc.....          | 1   | 0 | seq |
| .....ccuauuagagcuugacucu.....         | 1   | 0 | seq |
| .....ccuauuagagcuugacucua.....        | 1   | 0 | seq |
| .....ccuauuagagcuugacucuaagu.....     | 1   | 0 | seq |
| .....ccuauuagagcuugacucuaaguc.....    | 1   | 0 | seq |
| .....ccuUuugagcuugacucuaagucc.....    | 1   | 1 | seq |
| .....cuauuagagcuugacucu.....          | 2   | 0 | seq |
| .....cuauuagagcuugacucua.....         | 1   | 0 | seq |
| .....cuauuagagcuugacucuaag.....       | 1   | 0 | seq |
| .....cuauuagagcuugacucuaagu.....      | 1   | 0 | seq |
| .....cuauuagagcuugacucuaagucc.....    | 1   | 0 | seq |
| .....Nuugagcuugacucuaagucc.....       | 1   | 1 | seq |
| .....uugagcuugacucuaagG.....          | 2   | 1 | seq |
| .....uugagcuugacucuaagu.....          | 45  | 0 | seq |
| .....Cugagcuugacucuaaguc.....         | 1   | 1 | seq |
| .....uugagcuugacucuaaguc.....         | 43  | 0 | seq |
| .....uugagcuugacucuaagucG.....        | 3   | 1 | seq |
| .....Augagcuugacucuaagucc.....        | 1   | 1 | seq |
| .....Cugagcuugacucuaagucc.....        | 3   | 1 | seq |
| .....Gugagcuugacucuaagucc.....        | 1   | 1 | seq |
| .....uugagcuugacucAagucc.....         | 2   | 1 | seq |
| .....uugagcAugacucuaagucc.....        | 1   | 1 | seq |
| .....uugagcuugacucuaagucc.....        | 408 | 0 | seq |
| .....uugagcuugacucuaaguccC.....       | 5   | 1 | seq |
| .....uugagcuugacucuaaguccu.....       | 6   | 0 | seq |
| .....uagagcuugacucuaaguc.....         | 41  | 0 | seq |
| .....uUagcuugacucuaaguc.....          | 1   | 1 | seq |
| .....uagagcAugacucuaaguc.....         | 1   | 1 | seq |
| .....uCagcuugacucuaaguc.....          | 1   | 1 | seq |
| .....uagagcuugacucuaagucG.....        | 1   | 1 | seq |
| .....Agagcuugacucuaagucc.....         | 2   | 1 | seq |
| .....uagagcuugacucuaaguGc.....        | 1   | 1 | seq |
| .....uUagcuugacucuaagucc.....         | 1   | 1 | seq |
| .....uagagcuCgacucuaagucc.....        | 1   | 1 | seq |
| .....Ngagcuugacucuaagucc.....         | 1   | 1 | seq |
| .....uagagcuugacucuaagucc.....        | 519 | 0 | seq |
| .....uagagcuugacucuaaguccu.....       | 5   | 0 | seq |
| .....uagagcuugacucuaaguccC.....       | 4   | 1 | seq |
| .....uagagcuugacucuaaguccCa.....      | 2   | 1 | seq |
| .....gagcuCgacucuaagucc.....          | 14  | 1 | seq |
| .....gagcGugacucuaagucc.....          | 3   | 1 | seq |

## Star

## Mature

|                                                                                                                   |      |   |     |
|-------------------------------------------------------------------------------------------------------------------|------|---|-----|
| cugucccuagauacuaucuaagagaaacuacauccaagggaaugggcuuggaagaauuagcaggggaagaagaccuauuagagcuugacucuaaguccuaacccauucauagu |      |   |     |
| .....gagcuugUcucuaagucc.....                                                                                      | 1    | 1 | seq |
| .....Uagcuugacucuaagucc.....                                                                                      | 13   | 1 | seq |
| .....Nagcuugacucuaagucc.....                                                                                      | 8    | 1 | seq |
| .....gagcuugacuGuaagucc.....                                                                                      | 2    | 1 | seq |
| .....gagcuugacucuaagucc.....                                                                                      | 3987 | 0 | seq |
| .....gagcuugacucGagucc.....                                                                                       | 1    | 1 | seq |
| .....gagcuugacucuaagucG.....                                                                                      | 18   | 1 | seq |
| .....gagUuugacucuaagucc.....                                                                                      | 9    | 1 | seq |
| .....gagcuugacGcuagucc.....                                                                                       | 1    | 1 | seq |
| .....Cagcuugacucuaagucc.....                                                                                      | 2    | 1 | seq |
| .....gUgcuaugacucuaagucc.....                                                                                     | 1    | 1 | seq |
| .....gCgcuaugacucuaagucc.....                                                                                     | 2    | 1 | seq |
| .....gagcAugacucuaagucc.....                                                                                      | 2    | 1 | seq |
| .....gagcuugacucuaagGcc.....                                                                                      | 5    | 1 | seq |
| .....gagcuAugacucuaagucc.....                                                                                     | 1    | 1 | seq |
| .....gagcuGgacucuaagucc.....                                                                                      | 2    | 1 | seq |
| .....gagcuugGcucuaagucc.....                                                                                      | 13   | 1 | seq |
| .....gagcuugGcucuaaguccu.....                                                                                     | 1    | 1 | seq |
| .....gagcuugacucuaaguccu.....                                                                                     | 29   | 0 | seq |
| .....gagcuugacucuaagucGu.....                                                                                     | 1    | 1 | seq |
| .....agcuugGcucuaaguccu.....                                                                                      | 2    | 1 | seq |
| .....agcuugacucuCguccu.....                                                                                       | 1    | 1 | seq |
| .....agcuugacucuCguccu.....                                                                                       | 2    | 1 | seq |
| .....agcuugacucuaaguccu.....                                                                                      | 58   | 0 | seq |
| .....Ggcuaugacucuaaguccu.....                                                                                     | 1    | 1 | seq |
| .....agcuugacucuaaguccua.....                                                                                     | 1    | 0 | seq |
| .....agcuugacucuaaguccCa.....                                                                                     | 9    | 1 | seq |
| .....gcuugacucuaaguccua.....                                                                                      | 2    | 0 | seq |
| .....gcuugacucuaaguccC.....                                                                                       | 1    | 1 | seq |
| .....gcuugacucuaaguccCa.....                                                                                      | 13   | 1 | seq |
| .....gcuugacucuaaguGcua.....                                                                                      | 1    | 1 | seq |
| .....gcuugacucuaaguccGaac.....                                                                                    | 2    | 1 | seq |
| .....cuugacucuaaguccGaac.....                                                                                     | 1    | 1 | seq |

Provisional ID : MA\_157730\_8434  
 Score total : 268.2  
 Score for star read(s) : 3.9  
 Score for read counts : 278  
 Score for mfe : -11.4  
 Score for randfold : -2.2  
 Score for cons. seed :  
 Total read count : 557  
 Mature read count : 554  
 Loop read count : 0  
 Star read count : 3

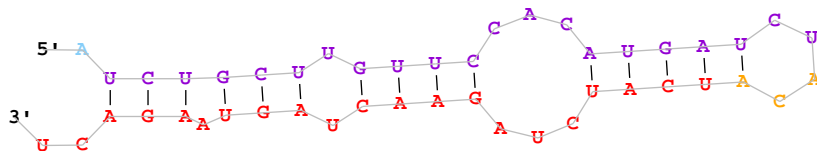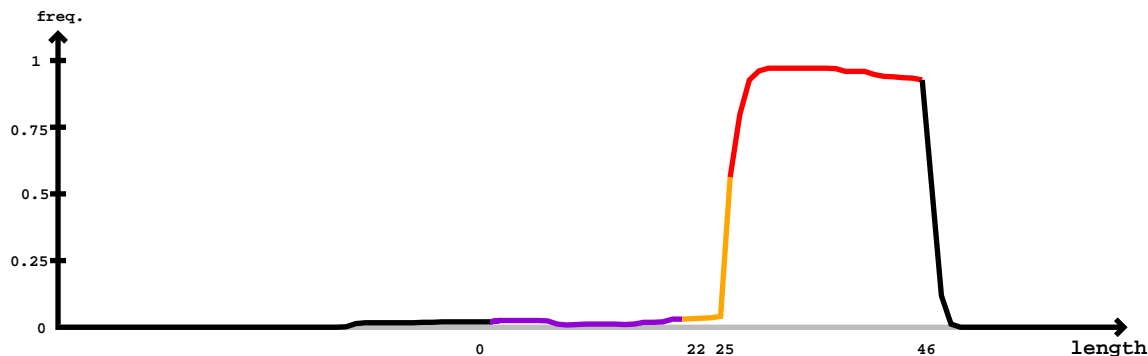

### Star Mature

| 5' -                                                                                                    | obs | exp | reads | mm | sample |
|---------------------------------------------------------------------------------------------------------|-----|-----|-------|----|--------|
| uaucgggagaaaacaucuuuaacuguaacuggcaaaagugcaucugcuuguccacaugaucuacacaucaucuaagaaagacuuaaaaagauaagagugacaa |     |     |       |    |        |
| ((((((((.....)))))).....(((.....))).....(((.....(((.....(((.....)))))).....)))).....)))).....)))).....  |     |     |       |    |        |
| .....aacGggcaaaagugcaucugc.....                                                                         |     |     | 1     | 1  | seq    |
| .....acGggcaaaagugcaucugcu.....                                                                         |     |     | 7     | 1  | seq    |
| .....cGggcaaaagugcaucugcuu.....                                                                         |     |     | 2     | 1  | seq    |
| .....aaagugcaucugcuuguucca.....                                                                         |     |     | 1     | 0  | seq    |
| .....agugcaucugcuuguuccaca.....                                                                         |     |     | 1     | 0  | seq    |
| .....ucugcuugCuccacaugaucu.....                                                                         |     |     | 1     | 1  | seq    |
| .....ucugcuuguuccacaugaucu.....                                                                         |     |     | 2     | 0  | seq    |
| .....uuccacaugaucuacaucauG.....                                                                         |     |     | 1     | 1  | seq    |
| .....uccacaugaucuacaucaucu.....                                                                         |     |     | 1     | 0  | seq    |
| .....augaucuacaucaucuagaac.....                                                                         |     |     | 1     | 0  | seq    |
| .....ugaucuacaucaucuUaacu.....                                                                          |     |     | 1     | 1  | seq    |
| .....ugaucuacaucaucuagaacu.....                                                                         |     |     | 4     | 0  | seq    |
| .....aucuacaucaucuagaacu.....                                                                           |     |     | 1     | 0  | seq    |
| .....ucuacaucaucuagaacuagC.....                                                                         |     |     | 2     | 1  | seq    |
| .....ucuacaucaucuagaacuagu.....                                                                         |     |     | 4     | 0  | seq    |
| .....uacaucaucuagaacuaguaa.....                                                                         |     |     | 1     | 0  | seq    |
| .....acaucaucuagaacuagu.....                                                                            |     |     | 1     | 0  | seq    |
| .....acaucaucuUaacuagua.....                                                                            |     |     | 1     | 1  | seq    |
| .....acaucaucuagaacuagua.....                                                                           |     |     | 1     | 0  | seq    |
| .....acaucaucuagaacuaguaag.....                                                                         |     |     | 2     | 0  | seq    |
| .....aucaucuagaacuagua.....                                                                             |     |     | 2     | 0  | seq    |
| .....aucaucuagaacuaguaagac.....                                                                         |     |     | 1     | 0  | seq    |
| .....ucaucuagaacuaguaagac.....                                                                          |     |     | 1     | 0  | seq    |
| .....ucaucuagaacuaguaagacC.....                                                                         |     |     | 41    | 1  | seq    |
| .....ucaucuagaacuaguaagaUu.....                                                                         |     |     | 1     | 1  | seq    |
| .....ucaucuagaacuaguaagacG.....                                                                         |     |     | 2     | 1  | seq    |
| .....ucaucuGgaacuaguaagacu.....                                                                         |     |     | 2     | 1  | seq    |
| .....ucaucuagGacuaguaagacu.....                                                                         |     |     | 1     | 1  | seq    |
| .....uUaucuagaacuaguaagacu.....                                                                         |     |     | 1     | 1  | seq    |
| .....ucaucuagaacuaguaagacu.....                                                                         |     |     | 232   | 0  | seq    |
| .....ucaCcuagaacuaguaagacu.....                                                                         |     |     | 2     | 1  | seq    |
| .....ucaucuagaacuaguaagacA.....                                                                         |     |     | 5     | 1  | seq    |
| .....ucaucuagaacuUaacuagacu.....                                                                        |     |     | 1     | 1  | seq    |

## Star

## Mature

|                                                                                           |                     |
|-------------------------------------------------------------------------------------------|---------------------|
| uaucgggagaaauacauuuuacuguaacugggcaaaagugcaucugcuuguuccacaugaucuacaucaucuaagaacuaaguaagacu | ucaaagauaagagugacaa |
| .....ucaucCagaacuaaguaagacu.....                                                          | 11seq               |
| .....Ccaucuaagaacuaaguaagacu.....                                                         | 11seq               |
| .....Ncaucuaagaacuaaguaagacu.....                                                         | 21seq               |
| .....ucaucuaagaacuaaguaGgacu.....                                                         | 11seq               |
| .....ucaucuaagaacuaaguaagGcu.....                                                         | 11seq               |
| .....ucaucuaagaacuaaguaagacuu.....                                                        | 100seq              |
| .....ucaucuaagaacuaaguaagacuC.....                                                        | 11seq               |
| .....ucaucuaagaGcuaguaagacuu.....                                                         | 11seq               |
| .....ucaucuaagaacuaaguaagacuG.....                                                        | 11seq               |
| .....caucuaagaacuaaguaagac.....                                                           | 20seq               |
| .....caucuaagaacuaaguaagacA.....                                                          | 11seq               |
| .....caucuaagaacuaaguaagacC.....                                                          | 11seq               |
| .....caucuaagaacuaaguaagacu.....                                                          | 120seq              |
| .....caucuaagaacuaaguaagacG.....                                                          | 11seq               |
| .....caucuaagaacuaaguaagacuG.....                                                         | 151seq              |
| .....caucuaagaacuaaguaagacCu.....                                                         | 11seq               |
| .....caucuaagaacuaaguaagacuC.....                                                         | 111seq              |
| .....caucuaagaGacuaguaagacuu.....                                                         | 11seq               |
| .....caucuaagaacuaaguaGgacuu.....                                                         | 11seq               |
| .....caucuaagaacuaaguaagacuu.....                                                         | 890seq              |
| .....caucuaagaacuaaguaagacuA.....                                                         | 31seq               |
| .....aucuaagaacuaaguaaga.....                                                             | 10seq               |
| .....aucuaagaacuaaguaagacC.....                                                           | 31seq               |
| .....aucuaagaacuaaguaagacu.....                                                           | 120seq              |
| .....aucuaagaacuaaguaagacuu.....                                                          | 20seq               |
| .....aucuaagaacuaaguaagacuuc.....                                                         | 50seq               |
| .....aucuaagaacuaaguaagacuuU.....                                                         | 541seq              |
| .....ucuagaacuaaguaagacA.....                                                             | 11seq               |
| .....ucuagaacuaaguaagacu.....                                                             | 40seq               |
| .....ucuagaacuaaguaagacC.....                                                             | 31seq               |
| .....ucuagaacuaaguaagacuG.....                                                            | 21seq               |
| .....ucuagaacuaaguaagacuuU.....                                                           | 31seq               |
| .....ucuagaacuaaguaagacuuUa.....                                                          | 71seq               |
| .....cuagaacuaaguaagacG.....                                                              | 11seq               |
| .....cuagaacuaaguaagacu.....                                                              | 40seq               |
| .....cuagaacuaaguaagacuG.....                                                             | 11seq               |
| .....uagaacuaaguaagacuu.....                                                              | 10seq               |
| .....agaacuaaguaagacuuU.....                                                              | 11seq               |

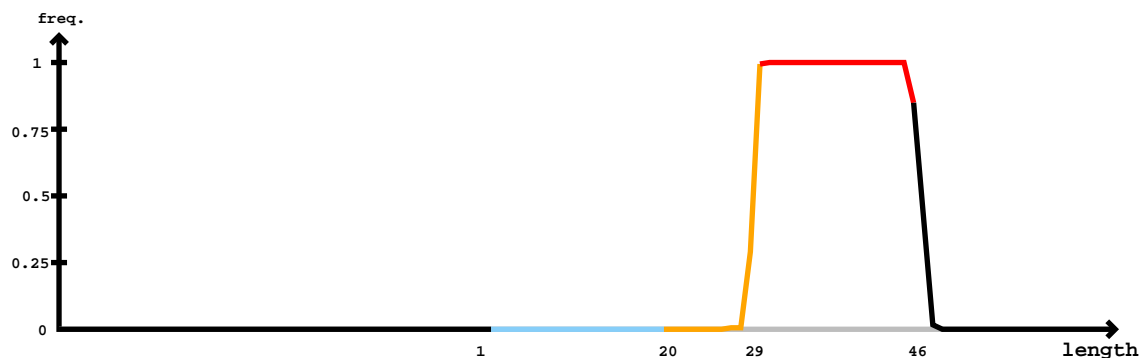

| 5'                                                                                             | Star               | Mature                      | -3'                  | exp   |    |
|------------------------------------------------------------------------------------------------|--------------------|-----------------------------|----------------------|-------|----|
| guugucgaugcucuccaagaggggccuaucaggagagacug                                                      | gaaagcucugcaucuauc | cugugauaauugggaucgagagcucca | uuaccuccuuaaaccuuuuu |       |    |
| .....((((((.....)))))).....((((((.....((((((((((((((((.....)))).....)))))))))))).....))))..... |                    |                             |                      | reads | mm |
| .....uCaugggaucgagagcucc.....                                                                  |                    |                             |                      | 1     | 1  |
| .....augggauccgagagcucc.....                                                                   |                    |                             |                      | 23    | 0  |
| .....auggUaucgagagcucc.....                                                                    |                    |                             |                      | 2     | 1  |
| .....augggauccgagagcucU.....                                                                   |                    |                             |                      | 1     | 1  |
| .....augggauccgagagcucca.....                                                                  |                    |                             |                      | 16    | 0  |
| .....augggauccgagagcuccC.....                                                                  |                    |                             |                      | 1     | 1  |
| .....augggauccgagagcAcca.....                                                                  |                    |                             |                      | 1     | 1  |
| .....auggUaucgagagcucca.....                                                                   |                    |                             |                      | 2     | 1  |
| .....augggauccgagagcuccG.....                                                                  |                    |                             |                      | 2     | 1  |
| .....auggAaucgagagcuccau.....                                                                  |                    |                             |                      | 3     | 1  |
| .....ugggauccgagagcuccG.....                                                                   |                    |                             |                      | 6     | 1  |
| .....ugggauccgagagcucca.....                                                                   |                    |                             |                      | 97    | 0  |
| .....uggCaucgagagcucca.....                                                                    |                    |                             |                      | 5     | 1  |
| .....Ggggaucgagagcucca.....                                                                    |                    |                             |                      | 1     | 1  |
| .....ugggauccUagagcucca.....                                                                   |                    |                             |                      | 1     | 1  |
| .....ugggauccgagagcuUca.....                                                                   |                    |                             |                      | 1     | 1  |
| .....uggAaucgagagcuccau.....                                                                   |                    |                             |                      | 12    | 1  |
| .....ugggauccgagagcuccaAu.....                                                                 |                    |                             |                      | 1     | 1  |
| .....uggAaucgagagcuccauu.....                                                                  |                    |                             |                      | 2     | 1  |
| .....ggAaucgagagcuccau.....                                                                    |                    |                             |                      | 1     | 1  |



# Star Mature

ugccagagguacggggaucgaucccccgcaucuccaccuucuauguuauuaauaaauuuuaacagaaaaauugaauguggguguuauagaguaaaauccuugggcuuu

|                               |     |   |     |
|-------------------------------|-----|---|-----|
| .....auuccccgcaucuccac.....   | 1   | 0 | seq |
| .....auGccccgcaucuccac.....   | 1   | 1 | seq |
| .....auucUccgcaucuccacc.....  | 1   | 1 | seq |
| .....auuccccgcaucuccacc.....  | 8   | 0 | seq |
| .....auuccoUgcaucuccacc.....  | 3   | 1 | seq |
| .....Guuccccgcaucuccacc.....  | 1   | 1 | seq |
| .....auGccccgcaucuccacc.....  | 1   | 1 | seq |
| .....Cuuccccgcaucuccacc.....  | 2   | 1 | seq |
| .....auuccccgcaucuccaccA..... | 13  | 1 | seq |
| .....auuccccgcaucuccaccu..... | 1   | 0 | seq |
| .....Uuuccccgcaucuccaccu..... | 6   | 1 | seq |
| .....uGccccgcaucuccacc.....   | 13  | 1 | seq |
| .....uuccccgcaucuccGcc.....   | 2   | 1 | seq |
| .....uucUccgcaucuccacc.....   | 15  | 1 | seq |
| .....uuccUcgcaucuccacc.....   | 12  | 1 | seq |
| .....uuccccgcaucuccacc.....   | 249 | 0 | seq |
| .....Cuuccccgcaucuccacc.....  | 1   | 1 | seq |
| .....uuccccgcaucuccaccG.....  | 1   | 1 | seq |
| .....uuccccgcaucuccaccA.....  | 9   | 1 | seq |
| .....uuUcccgcaucuccacc.....   | 2   | 1 | seq |
| .....uuccccUcaucuccacc.....   | 1   | 1 | seq |
| .....uuccccgcaucAccacc.....   | 1   | 1 | seq |
| .....uuccccAcaucuccacc.....   | 1   | 1 | seq |
| .....uuccccgUaucuccacc.....   | 1   | 1 | seq |
| .....uuccccgcaucuccaccG.....  | 18  | 1 | seq |
| .....uuccccgcaucuccaccC.....  | 5   | 1 | seq |
| .....uuccccgcaucuccaccu.....  | 2   | 0 | seq |
| .....ucUccgcaucuccaccu.....   | 3   | 1 | seq |
| .....uccccgcaucuccaccu.....   | 8   | 0 | seq |
| .....uccccgcaucuccaccC.....   | 5   | 1 | seq |
| .....Gccccgcaucuccaccu.....   | 2   | 1 | seq |
| .....uccUcgcaucuccaccu.....   | 2   | 1 | seq |
| .....uccccgcaucuccaccG.....   | 36  | 1 | seq |
| .....ccccgcaucuccaccCu.....   | 1   | 1 | seq |
| .....ccccgcaucuccaccuG.....   | 1   | 1 | seq |
| .....ccccgcaucuccaccAuc.....  | 2   | 1 | seq |

Provisional ID : MA\_161279\_16541  
 Score total : 0.3  
 Score for star read(s) : -1.3  
 Score for read counts : 0  
 Score for mfe : 0  
 Score for randfold : 1.6  
 Score for cons. seed :  
 Total read count : 228  
 Mature read count : 227  
 Loop read count : 1  
 Star read count : 0

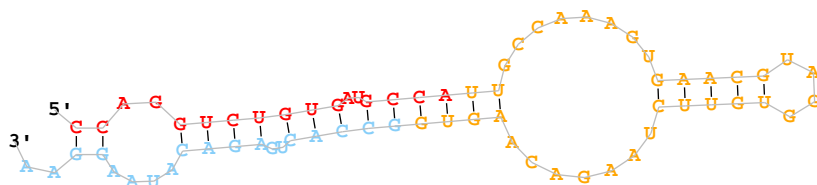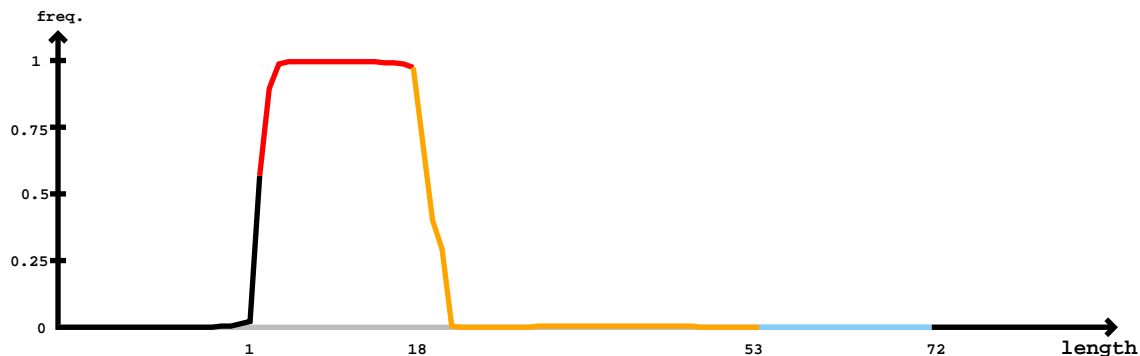

### Mature

### Star

| 5' -                                                                                                                 | -3'   | exp |        |
|----------------------------------------------------------------------------------------------------------------------|-------|-----|--------|
| aggcuuugagaagaauuuu <b>ccaggucugugaugccaauugccaaagugaacguagguguucuaagacaaguggccacugagacauaggaa</b> aaacuuguccuuaauaa | reads | mm  | sample |
| .....((.(((.(((((((.(((((((.....(((.....))))).))))).))))).)))).....                                                  | 1     | 1   | seq    |
| .....uCuuccaggucugugau.....                                                                                          | 1     | 1   | seq    |
| .....uuAcaggucugugaugc.....                                                                                          | 1     | 1   | seq    |
| .....uuAcaggucugugaugcc.....                                                                                         | 1     | 1   | seq    |
| .....uAcaggucugugaugcc.....                                                                                          | 2     | 1   | seq    |
| .....Acaggucugugaugcca.....                                                                                          | 122   | 1   | seq    |
| .....ccaggucugugaugccC.....                                                                                          | 3     | 1   | seq    |
| .....caggucugugaugccaG.....                                                                                          | 1     | 1   | seq    |
| .....caggucugugaugccGu.....                                                                                          | 1     | 1   | seq    |
| .....caggucugugaugccUu.....                                                                                          | 4     | 1   | seq    |
| .....caggucugugaugccaau.....                                                                                         | 6     | 0   | seq    |
| .....caggucugugaugccGuu.....                                                                                         | 4     | 1   | seq    |
| .....caggucugugaugccUuu.....                                                                                         | 12    | 1   | seq    |
| .....caggucugugaugccCuug.....                                                                                        | 45    | 1   | seq    |
| .....caggucugugaugccaauA.....                                                                                        | 2     | 1   | seq    |
| .....aggucugugaugccaau.....                                                                                          | 1     | 0   | seq    |
| .....aggucugugaugccaCu.....                                                                                          | 1     | 1   | seq    |
| .....aggucugugaugccauC.....                                                                                          | 1     | 1   | seq    |
| .....aggucugugaugccCuug.....                                                                                         | 17    | 1   | seq    |
| .....aggucugugaugccCuugc.....                                                                                        | 1     | 1   | seq    |
| .....ggucugugaugccCuug.....                                                                                          | 2     | 1   | seq    |
| .....acgCagguguucuaaga.....                                                                                          | 1     | 1   | seq    |



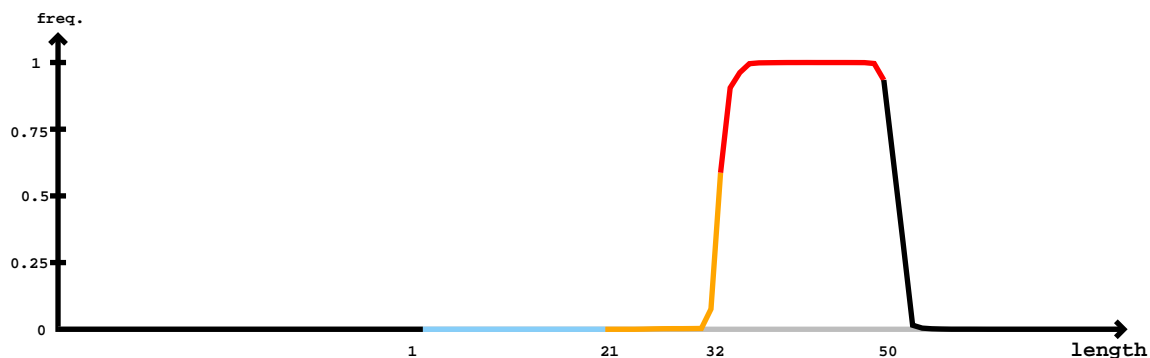

## Mature

| 5' | cauauguaauaugcuaagcguaaagcuauggauc                                                         | cauuuaaacuccauaguuagugcgcuuugcguaagaguaacuggggaugagugaccucucaggaaguccua | -3' | exp    |  |
|----|--------------------------------------------------------------------------------------------|-------------------------------------------------------------------------|-----|--------|--|
|    | ((.((((((((((.(...)))))))).( ((((((((((((((((((.(...)))))))).)))).)))).((.((((.(...)))))). | reads                                                                   | mm  | sample |  |
|    | .....gugcgcuuGggcuagaguaaguacugggauga.....                                                 | 1                                                                       | 1   | seq    |  |
|    | .....gcgcuuugggcuagagua.....                                                               | 1                                                                       | 0   | seq    |  |
|    | .....gcgcuuuuggcuaagagua.....                                                              | 1                                                                       | 0   | seq    |  |
|    | .....gcgcuuuuggcuaagaguaaguacugg.....                                                      | 1                                                                       | 0   | seq    |  |
|    | .....gcgcuuuuggcuaagaguaaguacuggga.....                                                    | 1                                                                       | 0   | seq    |  |
|    | .....gcgcuuuuggcuaagaguaaguacugggaug.....                                                  | 1                                                                       | 0   | seq    |  |
|    | .....gcgcuuuGggcuagaguaaguacugggauga.....                                                  | 16                                                                      | 1   | seq    |  |
|    | .....gcgcuuuGggcuagaguaaguacugggaugag.....                                                 | 7                                                                       | 1   | seq    |  |
|    | .....gcgcuuuGggcuagaguaaguacugggaugagag.....                                               | 2                                                                       | 1   | seq    |  |
|    | .....gcgcuuuGggcuagaguaaguacugggaugagag.....                                               | 4                                                                       | 1   | seq    |  |
|    | .....cgcuuGggcuagagua.....                                                                 | 1                                                                       | 1   | seq    |  |
|    | .....cgcuuGggcuagagua.....                                                                 | 1                                                                       | 1   | seq    |  |
|    | .....cgcuuGggcuagaguaaguacuggga.....                                                       | 2                                                                       | 1   | seq    |  |
|    | .....cgcuuGggcuagaguaaguacugggauga.....                                                    | 37                                                                      | 1   | seq    |  |
|    | .....cgcuuGggcuagaguaaguacugggaugag.....                                                   | 11                                                                      | 1   | seq    |  |
|    | .....cgcuuGggcuagaguaaguacugggaugagag.....                                                 | 2                                                                       | 1   | seq    |  |
|    | .....cgcuuGggcuagaguaaguacugggaugagag.....                                                 | 3                                                                       | 1   | seq    |  |
|    | .....gcuuuggcuaagagua.....                                                                 | 1                                                                       | 0   | seq    |  |
|    | .....gcuuuggcuaagaguaagu.....                                                              | 2                                                                       | 0   | seq    |  |
|    | .....gcuuGggcuagaguaaguacugg.....                                                          | 1                                                                       | 1   | seq    |  |
|    | .....gcuuuggcuaagaguaaguacuggga.....                                                       | 2                                                                       | 0   | seq    |  |
|    | .....gcuuuggcuaagaguaaguacugggU.....                                                       | 1                                                                       | 1   | seq    |  |
|    | .....gcuuuggcuaagGguaguacugggaug.....                                                      | 1                                                                       | 1   | seq    |  |
|    | .....gcuuuggcuaagaguaaguacugggaug.....                                                     | 1                                                                       | 0   | seq    |  |
|    | .....gcuuGggcuagaguaaguacugggauga.....                                                     | 20                                                                      | 1   | seq    |  |
|    | .....gcuuGggcuagaguaaguacugggaugag.....                                                    | 1                                                                       | 1   | seq    |  |
|    | .....gcuuGggcuagaguaaguacugggaugagag.....                                                  | 4                                                                       | 1   | seq    |  |
|    | .....cuuuggcuaagagua.....                                                                  | 3                                                                       | 0   | seq    |  |
|    | .....cuuGggcuagaguaaguacug.....                                                            | 1                                                                       | 1   | seq    |  |
|    | .....cuuuggcuaagaguaaguacug.....                                                           | 1                                                                       | 0   | seq    |  |
|    | .....cuuuggcuaagaguaaguUuggga.....                                                         | 1                                                                       | 1   | seq    |  |
|    | .....cuuuggcuaagaguaaguacugggG.....                                                        | 1                                                                       | 1   | seq    |  |
|    | .....cuuuggcuaagaguaaguacugggaug.....                                                      | 3                                                                       | 0   | seq    |  |
|    | .....cuuGggcuagaguaaguacugggaug.....                                                       | 1                                                                       | 1   | seq    |  |

## Star

## Mature

cau auguauaugccuauagcguuaaugcauuggaucccauuauaacuccauaguuaagugcgcuuuggcuagaguaguacuggggaugagugaccucucaggaaguccua

|                                     |       |   |     |
|-------------------------------------|-------|---|-----|
| .....uuuggcuagaguaguacugg.....      | 1     | 0 | seq |
| .....uuggcuagaguaguacu.....         | 2     | 0 | seq |
| .....Nuggcuagaguaguacug.....        | 1     | 1 | seq |
| .....uuggcuagaguaguacug.....        | 2     | 0 | seq |
| .....uuggcuagaguaguacugg.....       | 1     | 0 | seq |
| .....Nuggcuagaguaguacuggg.....      | 1     | 1 | seq |
| .....uuggcuagaguaguacuggg.....      | 1     | 0 | seq |
| .....uuggcuagaguaguacuggA.....      | 1     | 1 | seq |
| .....Nuggcuagaguaguacuggga.....     | 1     | 1 | seq |
| .....uuggcuagaguaguacuggga.....     | 2     | 0 | seq |
| .....uuggcuagaguaguacugggaC.....    | 1     | 1 | seq |
| .....Nuggcuagaguaguacugggaug.....   | 2     | 1 | seq |
| .....uuggcuagaguaguacugggaugaU..... | 1     | 1 | seq |
| .....uggcuagaguaguacug.....         | 3     | 0 | seq |
| .....Nggcuagaguaguacug.....         | 1     | 1 | seq |
| .....Nggcuagaguaguacugg.....        | 2     | 1 | seq |
| .....uggcuagaguaguacuggg.....       | 2     | 0 | seq |
| .....uGcguagaguaguacuggga.....      | 1     | 1 | seq |
| .....uUgcuagaguaguacuggga.....      | 1     | 1 | seq |
| .....Cggcuagaguaguacuggga.....      | 1     | 1 | seq |
| .....uggcuagaguaguacuggga.....      | 3     | 0 | seq |
| .....Nggcuagaguaguacuggga.....      | 1     | 1 | seq |
| .....uggcuagGguaguacugggau.....     | 2     | 1 | seq |
| .....uggcuagaguaguacugggaC.....     | 1     | 1 | seq |
| .....uggcuagaguaguacugggau.....     | 3     | 0 | seq |
| .....Cggcuagaguaguacugggaug.....    | 2     | 1 | seq |
| .....uggcuagaguaguacugggaug.....    | 5     | 0 | seq |
| .....ggcuagaguaguacugg.....         | 198   | 0 | seq |
| .....ggcuagaguaguacuggg.....        | 307   | 0 | seq |
| .....ggcuagaguaguacuggga.....       | 1632  | 0 | seq |
| .....ggcuagaguCguacuggga.....       | 1     | 1 | seq |
| .....Ngcuagaguaguacuggga.....       | 2     | 1 | seq |
| .....ggcuagagGaguacugggau.....      | 759   | 0 | seq |
| .....ggcuagaguaguaGugggau.....      | 1     | 1 | seq |
| .....Ngcuagaguaguacugggaug.....     | 2     | 1 | seq |
| .....ggcuagaguaguacugggaug.....     | 1421  | 0 | seq |
| .....ggcuagGguaguacugggauga.....    | 1     | 1 | seq |
| .....ggcuagaguaguacugggauga.....    | 35    | 0 | seq |
| .....ggcuagagGaguacugggauga.....    | 1     | 1 | seq |
| .....ggcuagaguaguacugggCugag.....   | 1     | 1 | seq |
| .....ggcuagaguaguacugggaugag.....   | 3     | 0 | seq |
| .....ggcuagaguGguacugggaugag.....   | 1     | 1 | seq |
| .....gcuagaguaguacuggg.....         | 3399  | 0 | seq |
| .....Ncuagaguaguacuggg.....         | 2     | 1 | seq |
| .....gcuCgaguaguacuggg.....         | 1     | 1 | seq |
| .....gcuagaguaguaGuggg.....         | 1     | 1 | seq |
| .....gcuCgaguaguacuggga.....        | 2     | 1 | seq |
| .....gcuagaguCguacuggga.....        | 3     | 1 | seq |
| .....gcuagaguaguaGuggga.....        | 3     | 1 | seq |
| .....gNuagaguaguacuggga.....        | 2     | 1 | seq |
| .....gcuagaguaguacuggga.....        | 15937 | 0 | seq |
| .....Ncuagaguaguacuggga.....        | 24    | 1 | seq |
| .....Ncuagaguaguacugggau.....       | 7     | 1 | seq |
| .....gcuagaguaguacugggau.....       | 3648  | 0 | seq |
| .....Ncuagaguaguacugggaug.....      | 8     | 1 | seq |
| .....gNuagaguaguacugggaug.....      | 2     | 1 | seq |
| .....gcuagaguaguacugggaug.....      | 7467  | 0 | seq |
| .....gcuagaguCguacugggaug.....      | 1     | 1 | seq |
| .....gcuagaguaguaGugggauga.....     | 1     | 1 | seq |
| .....gcuagaguaguacugggAauga.....    | 1     | 1 | seq |
| .....gcuagaguaguacugggGuga.....     | 2     | 1 | seq |
| .....gcuagaguaguGcugggauga.....     | 1     | 1 | seq |
| .....gcuagaguaguacugggaAga.....     | 1     | 1 | seq |
| .....Ucuagaguaguacugggauga.....     | 1     | 1 | seq |
| .....gcuagaguaguUcugggauga.....     | 1     | 1 | seq |
| .....gcuagaguaguacugggaGga.....     | 2     | 1 | seq |
| .....gcuagaguaguacugggauga.....     | 110   | 0 | seq |
| .....gcuagGguaguacugggauga.....     | 13    | 1 | seq |
| .....Acuagaguaguacugggauga.....     | 1     | 1 | seq |
| .....gcuagagCaguacugggauga.....     | 1     | 1 | seq |

## Star

## Mature

cauauaguuauugccuauagcguuaauugcauuggaucccauuauaacuccauaguuaagugcgcuuuggccuagaguaguacuggggaugagugaccucucaggaaguccua

|                                          |       |   |     |
|------------------------------------------|-------|---|-----|
| .....gcuagagCaguacugggauagag.....        | 1     | 1 | seq |
| .....gcuagaguaguacugggauagag.....        | 7     | 0 | seq |
| .....gcuagaguaguacugggauagauU.....       | 1     | 1 | seq |
| .....gcuagaguaguacugggauagagC.....       | 1     | 1 | seq |
| .....gcuagaguaguacugggauagCgu.....       | 2     | 1 | seq |
| .....gcuagaguaguacugggauagagug.....      | 1     | 0 | seq |
| .....gcuagaguaguacugggauagaguga.....     | 1     | 0 | seq |
| .....cuagaguCguacugggga.....             | 1     | 1 | seq |
| .....cuagaguaguacugggga.....             | 11182 | 0 | seq |
| .....Nuagaguaguacugggga.....             | 17    | 1 | seq |
| .....Nuagaguaguacugggau.....             | 1     | 1 | seq |
| .....cuagaguaguacugggau.....             | 1705  | 0 | seq |
| .....cuagaguaguacugggauag.....           | 5911  | 0 | seq |
| .....cuagaguCguacugggauag.....           | 2     | 1 | seq |
| .....Nuagaguaguacugggauag.....           | 14    | 1 | seq |
| .....cuCgaguaguacugggauag.....           | 1     | 1 | seq |
| .....cuagGguaguacugggauaga.....          | 23    | 1 | seq |
| .....cuagaguaguacugggGuga.....           | 1     | 1 | seq |
| .....cuGgaguaguacugggauaga.....          | 1     | 1 | seq |
| .....cuagaguagCacugggauaga.....          | 1     | 1 | seq |
| .....cuagUguaguacugggauaga.....          | 1     | 1 | seq |
| .....cuagaguaguacugggauaga.....          | 173   | 0 | seq |
| .....cuagaguaguacugggauUa.....           | 1     | 1 | seq |
| .....cuagGguaguacugggauagag.....         | 3     | 1 | seq |
| .....cuagaguaguacugggauagaU.....         | 1     | 1 | seq |
| .....cuagaguaguacugggauagNg.....         | 1     | 1 | seq |
| .....cuagaguaguacugggauagag.....         | 28    | 0 | seq |
| .....cuagaguaguacugggauagagu.....        | 7     | 0 | seq |
| .....Nuagaguaguacugggauagagu.....        | 1     | 1 | seq |
| .....cuagaguaguacugggGugagu.....         | 1     | 1 | seq |
| .....cuagaguaguacugggauagCgu.....        | 1     | 1 | seq |
| .....cuagaguaguacugggauagagG.....        | 1     | 1 | seq |
| .....cuagaguaguacugggAaugagu.....        | 1     | 1 | seq |
| .....cuagaguaguacugggauagagug.....       | 1     | 0 | seq |
| .....uagaguaguacugggau.....              | 1470  | 0 | seq |
| .....uCgaguaguacugggau.....              | 1     | 1 | seq |
| .....Nagaguaguacugggau.....              | 2     | 1 | seq |
| .....uagaguCguacugggauag.....            | 1     | 1 | seq |
| .....uCgaguaguacugggauag.....            | 1     | 1 | seq |
| .....Nagaguaguacugggauag.....            | 1     | 1 | seq |
| .....uagaguaguacugggauag.....            | 1889  | 0 | seq |
| .....uagaUuaguacugggauaga.....           | 1     | 1 | seq |
| .....uagaguaguacugggauaga.....           | 30    | 0 | seq |
| .....uagGguaguacugggauaga.....           | 4     | 1 | seq |
| .....uagaguaguacugggauUa.....            | 1     | 1 | seq |
| .....uagaguaguacugggauagag.....          | 5     | 0 | seq |
| .....uagaAuaguacugggauagag.....          | 1     | 1 | seq |
| .....uagaguaguacugggauagagu.....         | 2     | 0 | seq |
| .....uagaguaguacugggAaugagu.....         | 1     | 1 | seq |
| .....uagaguaguacugggauagaCu.....         | 1     | 1 | seq |
| .....uagaguaguacugggauagagugaccucCc..... | 1     | 1 | seq |
| .....agaguaguacugggauag.....             | 1946  | 0 | seq |
| .....Ngaguaguacugggauag.....             | 3     | 1 | seq |
| .....Cgaguaguacugggauag.....             | 3     | 1 | seq |
| .....agGguaguacugggauaga.....            | 3     | 1 | seq |
| .....agaguaguacugggauaga.....            | 41    | 0 | seq |
| .....agaguaguacugggauagag.....           | 8     | 0 | seq |
| .....agGguaguacugggauagag.....           | 1     | 1 | seq |
| .....agaguaguacugggauagagug.....         | 1     | 0 | seq |
| .....agaguaguacugggauagaguC.....         | 1     | 1 | seq |
| .....gaguaguacCgggauaga.....             | 1     | 1 | seq |
| .....gaguaguacugggauUa.....              | 1     | 1 | seq |
| .....gaguaguacuggggaAga.....             | 1     | 1 | seq |
| .....Uaguaguacugggauaga.....             | 1     | 1 | seq |
| .....gaguaguacuggggaGga.....             | 3     | 1 | seq |
| .....gGguaguacugggauaga.....             | 5     | 1 | seq |
| .....gaguGguacugggauaga.....             | 1     | 1 | seq |
| .....gaguaguacugggauaga.....             | 114   | 0 | seq |
| .....Naguaguacugggauaga.....             | 1     | 1 | seq |
| .....gUguaguacugggauaga.....             | 1     | 1 | seq |

Star

Mature

|                                      |                             |                                                       |   |     |  |
|--------------------------------------|-----------------------------|-------------------------------------------------------|---|-----|--|
| cauaguuauaugccuauagcguuaaugcauuggauc | ccauuuaaacuccauaguua        | agugcgcuuuggcuagaguaguacugggaugagugaccucucaggaaguccua |   |     |  |
| .....                                | .gaguaguacugggaugag.....    | 39                                                    | 0 | seq |  |
| .....                                | .gGguaguacugggaugag.....    | 2                                                     | 1 | seq |  |
| .....                                | .gaguaguaGugggaugag.....    | 1                                                     | 1 | seq |  |
| .....                                | .gaguaguGcugggaugag.....    | 1                                                     | 1 | seq |  |
| .....                                | .gaguaguacCgggaugag.....    | 1                                                     | 1 | seq |  |
| .....                                | .gaguaguacugggaugagu.....   | 4                                                     | 0 | seq |  |
| .....                                | .gaguaguacugggaugagu.....   | 3                                                     | 1 | seq |  |
| .....                                | .gaguaguacugggaugagug.....  | 6                                                     | 0 | seq |  |
| .....                                | .aguaguacugggaugag.....     | 22                                                    | 0 | seq |  |
| .....                                | .Gguaguacugggaugag.....     | 1                                                     | 1 | seq |  |
| .....                                | .aguaguacugggaugagu.....    | 4                                                     | 0 | seq |  |
| .....                                | .aguaguacugggaugagC.....    | 2                                                     | 1 | seq |  |
| .....                                | .aguaguacugggaugagug.....   | 2                                                     | 0 | seq |  |
| .....                                | .aguaguacugggaugagGg.....   | 1                                                     | 1 | seq |  |
| .....                                | .guaguacugggaugagu.....     | 15                                                    | 0 | seq |  |
| .....                                | .guaguacugggaugagu.....     | 1                                                     | 1 | seq |  |
| .....                                | .guaguacugggaugagC.....     | 2                                                     | 1 | seq |  |
| .....                                | .guaguacugggaugagug.....    | 4                                                     | 0 | seq |  |
| .....                                | .guaguacugggaugagugacc..... | 1                                                     | 0 | seq |  |
| .....                                | .uaguacugggaugaUug.....     | 1                                                     | 1 | seq |  |
| .....                                | .uaAuacugggaugagug.....     | 1                                                     | 1 | seq |  |
| .....                                | .uaguacugggaugagug.....     | 13                                                    | 0 | seq |  |
| .....                                | .uaguacugggaugagugacc.....  | 1                                                     | 0 | seq |  |
| .....                                | .uaguacugggaugagugGcc.....  | 1                                                     | 1 | seq |  |
| .....                                | .aguacugggaugagugacc.....   | 1                                                     | 0 | seq |  |
| .....                                | .aguacugggaugagugaccC.....  | 1                                                     | 1 | seq |  |
| .....                                | .guacugggaugagugacc.....    | 1                                                     | 0 | seq |  |
| .....                                | .guacugggaugagugGccu.....   | 1                                                     | 1 | seq |  |
| .....                                | .uacugggaugagugaccu.....    | 1                                                     | 0 | seq |  |

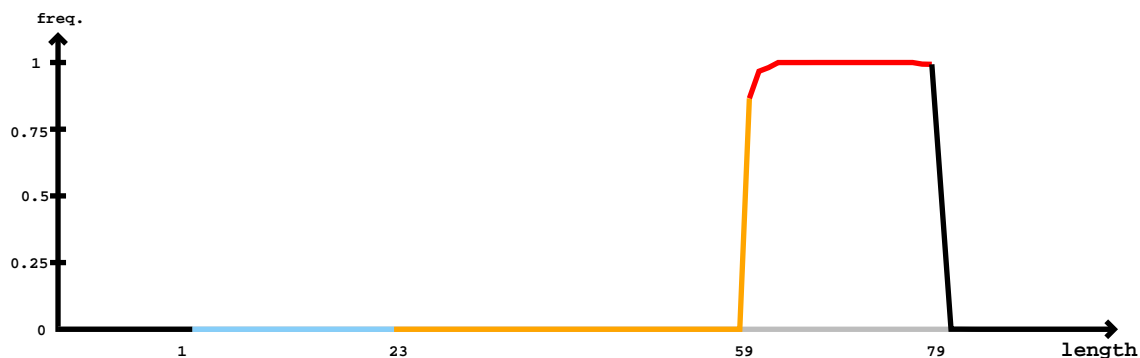

## Mature

[illegible]

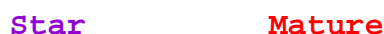

| 5'                                                                                                                                   | obs | exp | reads | mm | sample |
|--------------------------------------------------------------------------------------------------------------------------------------|-----|-----|-------|----|--------|
| uugugcaccaggaaaaaaaucauuaguggaaucuuuugua <u>uaagggaauagaaggaaauuau</u> <u>cuaaaau</u> <u>uguaaaugacuaugccuagau</u> cucaaagaaaugacaau | -3' |     |       |    |        |
| uugugcaccaggaaaaaaaucauuaguggaaucuuuugua <u>uaagggaauagaaggaaauuau</u> <u>cuaaaau</u> <u>uguaaaugacuaugccuagau</u> cucaaagaaaugacaau |     |     |       |    |        |
| (((((...(((...(((.....)))))).(((((...(((...(((.....)))))).((.....)))))).((.....)))))).((.....)))))).                                 |     |     |       |    |        |
| .....uaagggaauagaaggaaauuau.....                                                                                                     |     |     | 1     | 0  | seq    |
| .....agggaauagaaggaaauuau.....                                                                                                       |     |     | 1     | 0  | seq    |
| .....gggaauagaaggaaauuau.....                                                                                                        |     |     | 1     | 0  | seq    |
| .....uCuguaaaugacuaugccuagau <u>cucaa</u> .....                                                                                      |     |     | 1     | 1  | seq    |
| .....Uuguaaaugacuaugccuagau.....                                                                                                     |     |     | 3     | 1  | seq    |
| .....Nuguaaaugacuaugccuagau.....                                                                                                     |     |     | 1     | 1  | seq    |
| .....uguaaaugacuaugccC.....                                                                                                          |     |     | 4     | 1  | seq    |
| .....uguaaaugacuaugccu.....                                                                                                          |     |     | 21    | 0  | seq    |
| .....uguaaaugacuaugccG.....                                                                                                          |     |     | 1     | 1  | seq    |
| .....uguaaaugacuaugccA.....                                                                                                          |     |     | 1     | 1  | seq    |
| .....uguaaaugacuaugccua.....                                                                                                         |     |     | 16    | 0  | seq    |
| .....uguaaaugacuaugccuaA.....                                                                                                        |     |     | 1     | 1  | seq    |
| .....uguaaaugacuaugccuag.....                                                                                                        |     |     | 17    | 0  | seq    |
| .....uguaaaugacuaugccCag.....                                                                                                        |     |     | 1     | 1  | seq    |
| .....uguaaaugacuaugccuagC.....                                                                                                       |     |     | 1     | 1  | seq    |
| .....uguaaaugacuaugccuagG.....                                                                                                       |     |     | 1     | 1  | seq    |
| .....uguaaaugacuaugccuaga.....                                                                                                       |     |     | 5     | 0  | seq    |
| .....uguaaaugacuaugccuagau.....                                                                                                      |     |     | 213   | 0  | seq    |
| .....uguaaaugacuaugccuagaA.....                                                                                                      |     |     | 1     | 1  | seq    |
| .....Cguaaaugacuaugccuagau.....                                                                                                      |     |     | 1     | 1  | seq    |
| .....uguaaaugacuaugccuagaC.....                                                                                                      |     |     | 26    | 1  | seq    |
| .....uguaaaugacAaugccuagau.....                                                                                                      |     |     | 1     | 1  | seq    |
| .....uguaaaugacuaugccuagaG.....                                                                                                      |     |     | 2     | 1  | seq    |
| .....uguaaaugacuaugccCagau.....                                                                                                      |     |     | 2     | 1  | seq    |
| .....Gguaaaugacuaugccuagau.....                                                                                                      |     |     | 1     | 1  | seq    |
| .....uguGauugacuaugccuagauc.....                                                                                                     |     |     | 1     | 1  | seq    |
| .....uguaaaugacuaugccuagaCc.....                                                                                                     |     |     | 4     | 1  | seq    |
| .....uguaaaugacuaugccuagauU.....                                                                                                     |     |     | 6     | 1  | seq    |
| .....uguaaaugacuaugccuagGuc.....                                                                                                     |     |     | 1     | 1  | seq    |
| .....uguaaaugacuaugccuagauc.....                                                                                                     |     |     | 73    | 0  | seq    |
| .....Cguaaaugacuaugccuagauc.....                                                                                                     |     |     | 2     | 1  | seq    |
| .....uguaaaugacuaugccuagau <u>cu</u> .....                                                                                           |     |     | 4     | 0  | seq    |
| .....uguaaaugacuaugccuagau <u>cuc</u> .....                                                                                          |     |     | 5     | 0  | seq    |

## Star

## Mature

|                                                                                                                                                |   |   |     |
|------------------------------------------------------------------------------------------------------------------------------------------------|---|---|-----|
| uugugcaccaggaaaaaaaaaaucauuaguggaaucauuugua <u>uaagggaugaagg</u> aaauuau <u>cu</u> aa <u>ua</u> uguaauugacuaugccuagau <u>cu</u> caaagaaugacaau |   |   |     |
| .....uguaauugacuaugccuagaucu <u>ca</u> .....                                                                                                   | 4 | 0 | seq |
| .....uguaauugacuaugccuagaucu <u>caa</u> .....                                                                                                  | 2 | 0 | seq |
| .....guaauugGcuauGCCua.....                                                                                                                    | 1 | 1 | seq |
| .....guaauugacuaugccuagau.....                                                                                                                 | 2 | 0 | seq |
| .....guaauugacuaugccuagauc <u>uc</u> .....                                                                                                     | 2 | 0 | seq |
| .....uaauugacuaugccuaga <u>C</u> .....                                                                                                         | 2 | 1 | seq |
| .....uaauugacuaugccuaga <u>u</u> .....                                                                                                         | 3 | 0 | seq |
| .....uaaGugacuaugccuaga <u>uc</u> .....                                                                                                        | 1 | 1 | seq |
| .....uaauugacuaugccuaga <u>uc</u> .....                                                                                                        | 4 | 0 | seq |
| .....uaauugacuaugccuaga <u>uc</u> .....                                                                                                        | 2 | 0 | seq |
| .....aaauugacuaugccuaga <u>u</u> .....                                                                                                         | 1 | 0 | seq |
| .....auugacuaugccuaga <u>u</u> .....                                                                                                           | 3 | 0 | seq |
| .....auugacuaugccuaga <u>C</u> .....                                                                                                           | 1 | 1 | seq |
| .....auuCa <u>cu</u> auGCCuaga <u>uc</u> .....                                                                                                 | 1 | 1 | seq |
| .....auugacuaugccuaga <u>uc</u> .....                                                                                                          | 1 | 0 | seq |
| .....auugacuaugccuaga <u>uc</u> .....                                                                                                          | 1 | 0 | seq |
| .....auugacuaugccuaga <u>uc</u> .....                                                                                                          | 1 | 0 | seq |
| .....auugacuaugccuaga <u>uc</u> .....                                                                                                          | 1 | 0 | seq |
| .....auugacuaugccuaga <u>uc</u> .....                                                                                                          | 1 | 0 | seq |
| .....uugacuaugccuaga <u>uc</u> .....                                                                                                           | 1 | 0 | seq |
| .....uugacuaugccuaga <u>uc</u> U.....                                                                                                          | 1 | 1 | seq |
| .....uugacuaugccuaga <u>uc</u> caU.....                                                                                                        | 1 | 1 | seq |
| .....ugacuaugccuaga <u>uc</u> ca.....                                                                                                          | 2 | 0 | seq |
| .....gacuaugccuaga <u>uc</u> .....                                                                                                             | 3 | 0 | seq |
| .....gacuaugccuaga <u>uc</u> ca.....                                                                                                           | 2 | 0 | seq |
| .....acuauGCCuaga <u>uc</u> ca.....                                                                                                            | 1 | 0 | seq |

A diagram of a single-stranded RNA molecule. The sugar-phosphate backbone is shown as a zigzag line. Bases are represented by letters A, U, C, G. Complementary bases are connected by vertical lines representing hydrogen bonds: A pairs with U, U pairs with A, C pairs with G, and G pairs with C. The sequence from left to right is: 3' end (C-G), followed by a loop (G-C), then a series of pairs (A-U, C-G, G-C, G-C, G-C, G-C, U-A, A-G, A-U), another loop (U-C), and finally a tail ending in A-A at the 5' end.

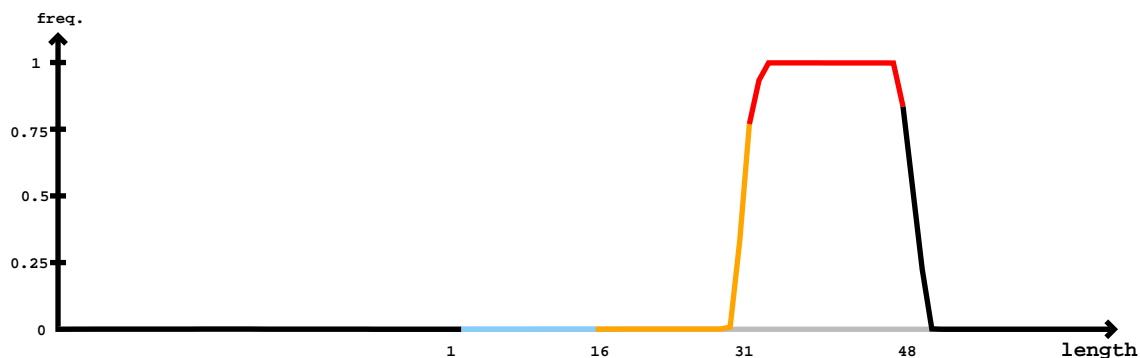

| 5' -                                                                           | acaaaacugaaggacuucaauugggcugacaucguugaaggu | gccuggggcuagaucuucaacaauuguuaguuucuggggccgcacgcgcgaugaggauunnnnnnnnnnnnnnn | -3'   | exp |        |
|--------------------------------------------------------------------------------|--------------------------------------------|----------------------------------------------------------------------------|-------|-----|--------|
| .....((((((((.....)))))))))((((((((((((((((((((.....))))).)))).))))).))))..... |                                            |                                                                            | reads | mm  | sample |
| Ucaaaacugaaggacuucaa.....                                                      |                                            |                                                                            | 1     | 1   | seq    |
| ..aaaacugaaggacuuca.....                                                       |                                            |                                                                            | 1     | 0   | seq    |
| ......acuucaauugggcugaGauc.....                                                |                                            |                                                                            | 1     | 1   | seq    |
| .....cuggggcuagaucuuCacaauuu.....                                              |                                            |                                                                            | 1     | 1   | seq    |
| .....uagaucuucCacaauuguuaguu.....                                              |                                            |                                                                            | 1     | 1   | seq    |
| .....aacaauuguuaguuUugggc.....                                                 |                                            |                                                                            | 1     | 1   | seq    |
| .....guUguucuggggccgcacgcgcga.....                                             |                                            |                                                                            | 1     | 1   | seq    |
| .....Nguucuggggccgcacgcg.....                                                  |                                            |                                                                            | 1     | 1   | seq    |
| .....aguucuggggccgcacgcgcg.....                                                |                                            |                                                                            | 5     | 0   | seq    |
| .....Cguucuggggccgcacgcgcg.....                                                |                                            |                                                                            | 3     | 1   | seq    |
| .....Nguucuggggccgcacgcgcg.....                                                |                                            |                                                                            | 3     | 1   | seq    |
| .....Cguucuggggccgcacgcgcg.....                                                |                                            |                                                                            | 5     | 1   | seq    |
| .....aguucuggggccgcacgcgcg.....                                                |                                            |                                                                            | 1     | 0   | seq    |
| .....aguucuggggccgcacgcgcga.....                                               |                                            |                                                                            | 1     | 0   | seq    |
| .....aguucuggggccgcacgcgcgG.....                                               |                                            |                                                                            | 7     | 1   | seq    |
| .....Nguucuggggccgcacgcgcga.....                                               |                                            |                                                                            | 1     | 1   | seq    |
| .....Uguucuggggccgcacgcgcgau.....                                              |                                            |                                                                            | 1     | 1   | seq    |
| .....guucuggggccgcacgcgcg.....                                                 |                                            |                                                                            | 512   | 0   | seq    |
| .....guucuggggccgcacgcgU.....                                                  |                                            |                                                                            | 10    | 1   | seq    |
| .....gCucuggggccgcacgcgcg.....                                                 |                                            |                                                                            | 1     | 1   | seq    |
| .....guucuggggccgcacgcgcA.....                                                 |                                            |                                                                            | 59    | 1   | seq    |
| .....guCcuggggccgcacgcgcg.....                                                 |                                            |                                                                            | 3     | 1   | seq    |
| .....guucuggggccgcGgcgcg.....                                                  |                                            |                                                                            | 2     | 1   | seq    |
| .....guucCggggccgcacgcgcg.....                                                 |                                            |                                                                            | 1     | 1   | seq    |
| .....guucuggggccgcacgcGg.....                                                  |                                            |                                                                            | 3     | 1   | seq    |
| .....guucuggggccgcGgcg.....                                                    |                                            |                                                                            | 1     | 1   | seq    |
| .....Uuucuggggccgcacgcgcg.....                                                 |                                            |                                                                            | 1     | 1   | seq    |
| .....guucAgggccgcacgcgcg.....                                                  |                                            |                                                                            | 1     | 1   | seq    |
| .....guucugggAcgcacgcgcg.....                                                  |                                            |                                                                            | 1     | 1   | seq    |
| .....guucuggggccgcacgcC.....                                                   |                                            |                                                                            | 5     | 1   | seq    |
| .....Nuucuggggccgcacgcgcg.....                                                 |                                            |                                                                            | 1     | 1   | seq    |
| .....guucCggggccgcacgcgcg.....                                                 |                                            |                                                                            | 1     | 1   | seq    |
| .....guucuggggccgcacgcgcU.....                                                 |                                            |                                                                            | 62    | 1   | seq    |
| .....gCucuggggccgcacgcgcg.....                                                 |                                            |                                                                            | 1     | 1   | seq    |



## Star

## Mature

acaaaacugaaggacuucaauggcugacaucguugaaggugccuggggcuagaucuucaacaauuguuaguuuucuggggcgacgcgcgaugaggauunnnnnnnnnnnnn

|                                 |     |   |     |
|---------------------------------|-----|---|-----|
| .....guucuggggccgcacgcgcG.....  | 3   | 1 | seq |
| .....Cuucuggggccgcacgcgc.....   | 1   | 1 | seq |
| .....guucuggggccgcacgcCc.....   | 1   | 1 | seq |
| .....guucuggggccgcacgcgc.....   | 314 | 0 | seq |
| .....guucuggggccgcacgcAc.....   | 1   | 1 | seq |
| .....guucuggggccgcCcgcgc.....   | 2   | 1 | seq |
| .....guCuggggccgcacgcgc.....    | 1   | 1 | seq |
| .....guucuggggccUcagcgca.....   | 1   | 1 | seq |
| .....guucuggggccgcacgcgc.....   | 48  | 0 | seq |
| .....guCuggggccgcacgcgc.....    | 1   | 1 | seq |
| .....guucuggggccgcacgcgcU.....  | 10  | 1 | seq |
| .....guucugAgccgcacgcgc.....    | 1   | 1 | seq |
| .....Uuucuggggccgcacgcgc.....   | 1   | 1 | seq |
| .....guucuggggccgcacgcgcC.....  | 8   | 1 | seq |
| .....guucuggggccgcacgcgcU.....  | 2   | 0 | seq |
| .....guucuggggccgcacgcgcGu..... | 156 | 1 | seq |
| .....guucuggggccgcacgcgcCu..... | 1   | 1 | seq |
| .....uucuggggccgcCcgcgc.....    | 3   | 1 | seq |
| .....uucuggggcAgcacgcgc.....    | 1   | 1 | seq |
| .....Nucuggggccgcacgcgc.....    | 4   | 1 | seq |
| .....uucuggggccgcacgcAc.....    | 1   | 1 | seq |
| .....uucCggggccgcacgcgc.....    | 2   | 1 | seq |
| .....uucuggggccgcacgcgc.....    | 586 | 0 | seq |
| .....Cucuggggccgcacgcgc.....    | 3   | 1 | seq |
| .....uucAgggccgcacgcgc.....     | 1   | 1 | seq |
| .....Aucuggggccgcacgcgc.....    | 1   | 1 | seq |
| .....uCuuggggccgcacgcgc.....    | 1   | 1 | seq |
| .....uucuggggccgcacgcgcU.....   | 108 | 1 | seq |
| .....uucuggggccgcacgcgc.....    | 1   | 1 | seq |
| .....uucuggggccgcGacgcgc.....   | 1   | 1 | seq |
| .....uucuggggccgcacgcgcG.....   | 7   | 1 | seq |
| .....uucuggggccgcacgcUgca.....  | 3   | 1 | seq |
| .....uucUAgggccgcacgcgc.....    | 1   | 1 | seq |
| .....uucuggggccgcUcgcgc.....    | 1   | 1 | seq |
| .....uucuggggccgcacgcgcU.....   | 84  | 1 | seq |
| .....uucuggggccgcacgcgcC.....   | 54  | 1 | seq |
| .....Cucuggggccgcacgcgc.....    | 4   | 1 | seq |
| .....uucuggggcAgcacgcgc.....    | 1   | 1 | seq |
| .....uucCggggccgcacgcgc.....    | 2   | 1 | seq |
| .....uucuggggccgcCcgcgc.....    | 2   | 1 | seq |
| .....uucuggggccgcacgcgcUa.....  | 2   | 1 | seq |
| .....uucuggggccgcAcgcgc.....    | 1   | 1 | seq |
| .....uucuggggccgcUgcgc.....     | 1   | 1 | seq |
| .....uCuuggggccgcacgcgc.....    | 4   | 1 | seq |
| .....uucuggggccgcGgcgc.....     | 1   | 1 | seq |
| .....uucuggggccgcacgcAc.....    | 3   | 1 | seq |
| .....uucuggggccgcGacgcgc.....   | 1   | 1 | seq |
| .....uucuggggccgcacgcgc.....    | 501 | 0 | seq |
| .....GuCuggggccgcacgcgc.....    | 2   | 1 | seq |
| .....uucuggggccgcacgcgcG.....   | 1   | 1 | seq |
| .....uuUuggggccgcacgcgc.....    | 2   | 1 | seq |
| .....uucuggggccgcacgcgcCu.....  | 2   | 1 | seq |
| .....uucuggggccgcacgcgcGu.....  | 246 | 1 | seq |
| .....uucuggggccgcacgcgcU.....   | 2   | 0 | seq |
| .....ucuggggccgUacgcgc.....     | 2   | 1 | seq |
| .....ucuggggccgcacgcgcG.....    | 1   | 1 | seq |
| .....ucuggggccgcacgcgc.....     | 322 | 0 | seq |
| .....Ccuggggccgcacgcgc.....     | 1   | 1 | seq |
| .....ucuggggccgcAcgcgc.....     | 2   | 1 | seq |
| .....ucuggggccgcacgcgcC.....    | 35  | 1 | seq |
| .....ucuggggccgcacgcgcUa.....   | 1   | 1 | seq |
| .....ucuggggccAcacgcgc.....     | 1   | 1 | seq |
| .....ucuggggccgcacgcgcU.....    | 53  | 1 | seq |
| .....ucuggggccgcacgcAc.....     | 2   | 1 | seq |
| .....ucUggccgcacgcgc.....       | 1   | 1 | seq |
| .....ucuggggccgcUgcgc.....      | 1   | 1 | seq |
| .....ucuggggccgcacgcgcGa.....   | 1   | 1 | seq |
| .....ucuggggccgcCcgcgc.....     | 3   | 1 | seq |
| .....ucuggggccgcacgcgcAa.....   | 1   | 1 | seq |
| .....uUuggggccgcacgcgc.....     | 1   | 1 | seq |

Star

## Mature

acaaaacugaaggacuucaauggcugacaucguugaaggu**gccugggcuagaucu**uacaacauguuguag**uucuggggccgcacgcgc**augaggauunnnnnnnnnnnnn

|                               |     |   |     |
|-------------------------------|-----|---|-----|
| .....ucugggccgcacgcgcgau..... | 1   | 0 | seq |
| .....ucugggccgcacgcgcGu.....  | 186 | 1 | seq |
| .....ucugggccgcacgcgcGug..... | 1   | 1 | seq |
| .....cugggccgcacgcgcCu.....   | 4   | 1 | seq |
| .....cugggccgcacgcgcGu.....   | 239 | 1 | seq |
| .....cugggccgcacgcgcGug.....  | 2   | 1 | seq |
| .....cugggccgcacgcgcUug.....  | 1   | 1 | seq |
| .....cugggccgcacgcgcaug.....  | 1   | 0 | seq |

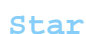[illegible]

## Star

## Mature

accacacuggggucauuguccgacaguuggagccaauguugacaaaauugggucaucuaauuuucccacuucuggauuuuauugaagccuuguuaucaaaagaaga

|                                |     |   |     |
|--------------------------------|-----|---|-----|
| .....ucuggauuuuauugaGag.....   | 3   | 1 | seq |
| .....ucuggaAuuaugaaag.....     | 1   | 1 | seq |
| .....ucuggauGuaugaaag.....     | 2   | 1 | seq |
| .....uUuuggauuuuauugaag.....   | 4   | 1 | seq |
| .....ucuggGuuuuauugaag.....    | 16  | 1 | seq |
| .....ucuggUuuuauugaag.....     | 1   | 1 | seq |
| .....ucuuAgauuuuauugaag.....   | 2   | 1 | seq |
| .....ucuggauuuuauugaaCC.....   | 1   | 1 | seq |
| .....ucuggauuuuauugaagU.....   | 5   | 1 | seq |
| .....ucuggauuuuauugaagUc.....  | 1   | 1 | seq |
| .....ucuggauuuuauugaagGc.....  | 7   | 1 | seq |
| .....ucuggauuuuauugaagcA.....  | 2   | 1 | seq |
| .....ucuggauuuuauugaagcc.....  | 1   | 0 | seq |
| .....ucuggauuuuauugaagcG.....  | 1   | 1 | seq |
| .....ucuggauuuuauugaagGcu..... | 1   | 1 | seq |
| .....ucuggauuuuauugaagccA..... | 1   | 1 | seq |
| .....ucuggauuuuauugaagccu..... | 1   | 0 | seq |
| .....ucuggauuuuauugaagccG..... | 4   | 1 | seq |
| .....ucuggauuuuauugaagAcu..... | 151 | 1 | seq |
| .....ucuggauuuuauugaagAuu..... | 1   | 1 | seq |
| .....cuuggauuuuauugaagU.....   | 3   | 1 | seq |
| .....cuuggauuuuauugaagcA.....  | 1   | 1 | seq |
| .....uuggauuCaugaagcc.....     | 1   | 1 | seq |
| .....uggauuuuauugaagccG.....   | 2   | 1 | seq |

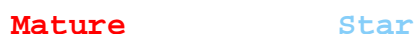

Mature Star

Mature Star

aguuaagugcacucaggaagaguaguacugggaugagugaccgcccgagaaguccuaguauuuuacaugccuauggcauuuuauaaacuuaaguccaauuuaucccacau

|                                     |    |   |     |
|-------------------------------------|----|---|-----|
| .....gaguaguacUggggaugag.....       | 1  | 1 | seq |
| .....gaguaguGcuggggaugag.....       | 1  | 1 | seq |
| .....gGguaguacuggggaugag.....       | 2  | 1 | seq |
| .....gaguaguacuggggaugag.....       | 39 | 0 | seq |
| .....gaguaguacCggggaugag.....       | 1  | 1 | seq |
| .....gaguaguacuggglaugagu.....      | 3  | 1 | seq |
| .....gaguaguacuggggaugagu.....      | 4  | 0 | seq |
| .....gaguaguacuggggaugagug.....     | 6  | 0 | seq |
| .....Gguaguacuggggaugag.....        | 1  | 1 | seq |
| .....aguaguacuggggaugag.....        | 22 | 0 | seq |
| .....aguaguacuggggaugagC.....       | 2  | 1 | seq |
| .....aguaguacuggggaugagu.....       | 4  | 0 | seq |
| .....aguaguacuggggaugagGg.....      | 1  | 1 | seq |
| .....aguaguacuggggaugagug.....      | 2  | 0 | seq |
| .....aguaguacuggggaugUguagaccg..... | 1  | 1 | seq |
| .....guaguacuggglaugagu.....        | 1  | 1 | seq |
| .....guaguacuggggaugagu.....        | 15 | 0 | seq |
| .....guaguacuggggaugagC.....        | 2  | 1 | seq |
| .....guaguacuggggaugagug.....       | 4  | 0 | seq |
| .....guaguacuggggaugagugacc.....    | 1  | 0 | seq |
| .....uaguacuggggaugagug.....        | 13 | 0 | seq |
| .....uaguacuggggaugaUug.....        | 1  | 1 | seq |
| .....uaauacuggggaugagug.....        | 1  | 1 | seq |
| .....uaguacuggggaugagugacc.....     | 1  | 0 | seq |
| .....uaguacuggggaugagugGcc.....     | 1  | 1 | seq |
| .....aguacuggggaugagugacc.....      | 1  | 0 | seq |
| .....aguacuggggaugagugaccC.....     | 1  | 1 | seq |
| .....guacuggggaugagugacc.....       | 1  | 0 | seq |

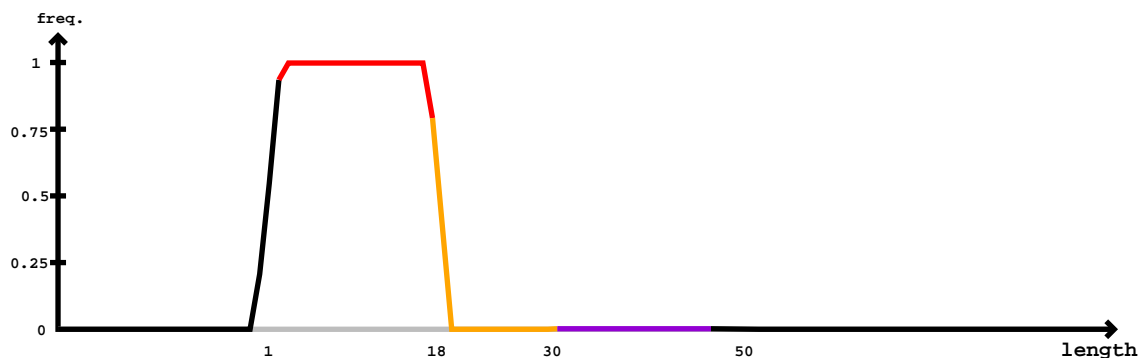

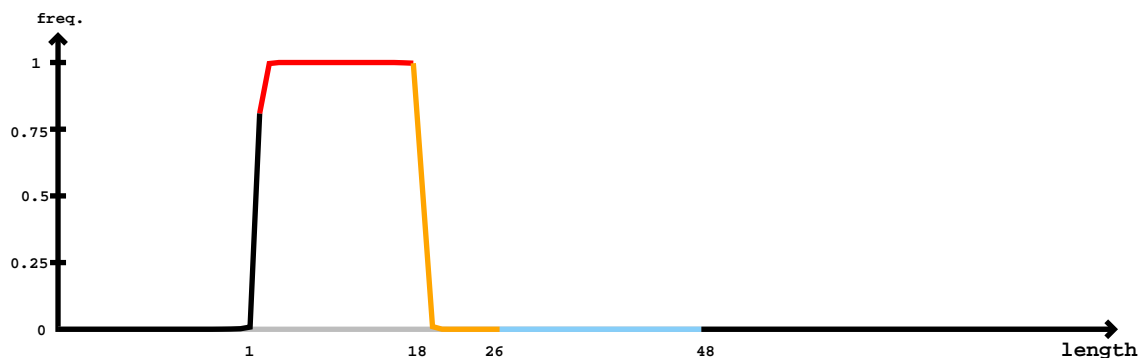

|                                                                                          | -3'   | exp |        |
|------------------------------------------------------------------------------------------|-------|-----|--------|
| .(((.((((.((((.....((((((((((((((...))))))....)))))))....))))). .... ))..)))))))). ..... | reads | mm  | sample |
| .....aGauaguaguacugggaug.....                                                            | 1     | 1   | seq    |
| .....Cuauaguaguacugggaugggc.....                                                         | 1     | 1   | seq    |
| .....uauaguaguacugggaugggA.....                                                          | 1     | 1   | seq    |
| .....uaGaguaguacugggauggggca.....                                                        | 2     | 1   | seq    |
| .....Cuaguaguacugggaug.....                                                              | 2     | 1   | seq    |
| .....auaguaguacugggaug.....                                                              | 3     | 0   | seq    |
| .....Nuaguaguacugggaug.....                                                              | 1     | 1   | seq    |
| .....Cuaguaguacugggauggg.....                                                            | 1     | 1   | seq    |
| .....Nuaguaguacugggaugggg.....                                                           | 1     | 1   | seq    |
| .....uaguaguacugggaugaA.....                                                             | 1     | 1   | seq    |
| .....uaguaguacugggaugg.....                                                              | 5     | 0   | seq    |
| .....Naguaguacugggaugg.....                                                              | 4     | 1   | seq    |
| .....uaguaguacugggaugggg.....                                                            | 10    | 0   | seq    |
| .....Naguaguacugggaugggg.....                                                            | 7     | 1   | seq    |
| .....uaguaguacugggauggggc.....                                                           | 1     | 0   | seq    |
| .....uaguaguacugggauggggA.....                                                           | 1     | 1   | seq    |
| .....Gaguaguacugggauggggca.....                                                          | 11    | 1   | seq    |
| .....aguaguacugggaugggg.....                                                             | 4372  | 0   | seq    |
| .....Nguaguacugggaugggg.....                                                             | 6     | 1   | seq    |
| .....aAuaguacugggauggggc.....                                                            | 1     | 1   | seq    |
| .....aguaguacugggaCgggc.....                                                             | 1     | 1   | seq    |
| .....aguaguacugggGugggc.....                                                             | 6     | 1   | seq    |
| .....aguaguacugggauggGC.....                                                             | 3     | 1   | seq    |
| .....aguaguacugggaAgggc.....                                                             | 1     | 1   | seq    |
| .....aguaguacugggaugggAc.....                                                            | 1     | 1   | seq    |
| .....aguaguacAggggaugggc.....                                                            | 1     | 1   | seq    |
| .....aguaAuacugggauggggc.....                                                            | 1     | 1   | seq    |
| .....agCaguacugggauggggc.....                                                            | 1     | 1   | seq    |
| .....aguaguacGgggauggggc.....                                                            | 1     | 1   | seq    |
| .....aguaguacugggauCggc.....                                                             | 2     | 1   | seq    |
| .....aguaguGcugggauggggc.....                                                            | 1     | 1   | seq    |
| .....aguaguacugggauggggG.....                                                            | 131   | 1   | seq    |
| .....Gguaguacugggauggggc.....                                                            | 5     | 1   | seq    |
| .....aguaguacCgggauggggc.....                                                            | 3     | 1   | seq    |



Mature

Star

|                                                                                                                                       |      |   |     |
|---------------------------------------------------------------------------------------------------------------------------------------|------|---|-----|
| uuagcaugcucaggauau <u>aguaguacugggaugggg</u> <u>aaaccgcc</u> cgaaaaguccuaguuuuuac <u>a</u> ugccuaugggcauuuuuauuuuuaguccaauuuuauccacau |      |   |     |
| .....aguaguacugggaugAgc.....                                                                                                          | 2    | 1 | seq |
| .....aguaguacugggaugggc.....                                                                                                          | 596  | 0 | seq |
| .....aguaguacugggaucGggca.....                                                                                                        | 1    | 1 | seq |
| .....aguaguacugggaugggcU.....                                                                                                         | 2    | 1 | seq |
| .....aguaguacugggaugggcC.....                                                                                                         | 2    | 1 | seq |
| .....aguaguacugggaugggGc.....                                                                                                         | 1    | 1 | seq |
| .....aguaguacugggauggggca.....                                                                                                        | 7    | 0 | seq |
| .....gCaguacugggaugggc.....                                                                                                           | 4    | 1 | seq |
| .....Uuaguacugggaugggc.....                                                                                                           | 1    | 1 | seq |
| .....guaguacugggaugAgc.....                                                                                                           | 2    | 1 | seq |
| .....guaguacuAggaugggc.....                                                                                                           | 1    | 1 | seq |
| .....guaguacuUggaugggc.....                                                                                                           | 1    | 1 | seq |
| .....guaguacugUgaugggc.....                                                                                                           | 1    | 1 | seq |
| .....guaguacugggaCgggc.....                                                                                                           | 2    | 1 | seq |
| .....guaguacugggCugggc.....                                                                                                           | 1    | 1 | seq |
| .....guaguacugggauggAc.....                                                                                                           | 3    | 1 | seq |
| .....guGguacugggaugggc.....                                                                                                           | 5    | 1 | seq |
| .....guaguacugggaGgggc.....                                                                                                           | 1    | 1 | seq |
| .....Auaguacugggaugggc.....                                                                                                           | 1    | 1 | seq |
| .....guaguacugggaugggc.....                                                                                                           | 1142 | 0 | seq |
| .....guUguacugggaugggc.....                                                                                                           | 1    | 1 | seq |
| .....Nuaguacugggaugggc.....                                                                                                           | 2    | 1 | seq |
| .....guaguacugggaAgggc.....                                                                                                           | 2    | 1 | seq |
| .....guaguacugggGugggc.....                                                                                                           | 4    | 1 | seq |
| .....guaguacGgggaugggc.....                                                                                                           | 1    | 1 | seq |
| .....guaguGcuugggaugggc.....                                                                                                          | 8    | 1 | seq |
| .....guaguacugggauggGc.....                                                                                                           | 2    | 1 | seq |
| .....guaguacCgggaugggc.....                                                                                                           | 1    | 1 | seq |
| .....guaguacugggaugggcU.....                                                                                                          | 4    | 1 | seq |
| .....guaguacugggauggggca.....                                                                                                         | 5    | 0 | seq |
| .....guaguacGgggauggggca.....                                                                                                         | 1    | 1 | seq |
| .....guaguacugggaugggcC.....                                                                                                          | 3    | 1 | seq |
| .....uaguacugggaAgggca.....                                                                                                           | 1    | 1 | seq |
| .....uaguacugggauggggca.....                                                                                                          | 14   | 0 | seq |
| .....uaguacugggaugggcC.....                                                                                                           | 3    | 1 | seq |
| .....uaguacugggaugggcU.....                                                                                                           | 6    | 1 | seq |
| .....uaguacugggaugggcCa.....                                                                                                          | 1    | 1 | seq |

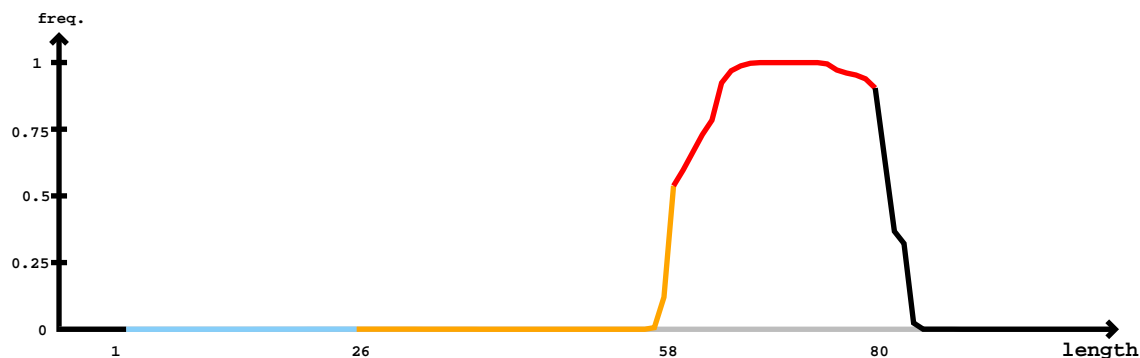

## Mature

[illegible]

## Star

## Mature

acacaagucuccaaaaaucauaagaccaguaugagggcugacaccuucccaguuuuaagguaaggaaguuggugaccugaugauggggaaaccaacgacugaa

|                                       |      |   |     |
|---------------------------------------|------|---|-----|
| .....agguaaggaaguuggugaUcug.....      | 1    | 1 | seq |
| .....agguaGggaaguuggugaccug.....      | 1    | 1 | seq |
| .....agguaaaggaGguuggugaccug.....     | 1    | 1 | seq |
| .....agguaaggaaguuggugaccuC.....      | 1    | 1 | seq |
| .....agguaaggaaguuggugaccGg.....      | 1    | 1 | seq |
| .....aggCuaaggaaguuggugaccuga.....    | 1    | 1 | seq |
| .....agguaaggaaguuggugaccugG.....     | 5    | 1 | seq |
| .....agguaaaggaaguuggugaccCga.....    | 1    | 1 | seq |
| .....agguaaaggaGguuggugaccuga.....    | 2    | 1 | seq |
| .....Ggguuaaggaaguuggugaccuga.....    | 1    | 1 | seq |
| .....aggAuaaggaaguuggugaccuga.....    | 1    | 1 | seq |
| .....agguaaggaaguuggugUccuga.....     | 1    | 1 | seq |
| .....agguaaggaaguuggugaccuCa.....     | 1    | 1 | seq |
| .....agguaaaggaaguuggugaccAga.....    | 1    | 1 | seq |
| .....agguaaaggaaguuggugaccuga.....    | 140  | 0 | seq |
| .....agguaaggaagCuggugaccuga.....     | 1    | 1 | seq |
| .....agguaaaggaaguuggugaccugaG.....   | 1    | 1 | seq |
| .....agguaaaggaaguuggugaccugau.....   | 16   | 0 | seq |
| .....agguaaggaaguuggCgaccugau.....    | 1    | 1 | seq |
| .....aggCuaaggaaguuggugaccugau.....   | 1    | 1 | seq |
| .....agguaaaggaaguuggugaccugaC.....   | 2    | 1 | seq |
| .....Ngguuaaggaaguuggugaccugau.....   | 1    | 1 | seq |
| .....agguCaaggaaguuggugaccugaug.....  | 1    | 1 | seq |
| .....agguaaggaaguuggugaccugaug.....   | 150  | 0 | seq |
| .....agguaagUaaguuggugaccugaug.....   | 1    | 1 | seq |
| .....agguaaaggaaguuggugGccugaug.....  | 1    | 1 | seq |
| .....aAguaaaggaaguuggugaccugaug.....  | 1    | 1 | seq |
| .....agguaaaggaaguugguUaccugaug.....  | 1    | 1 | seq |
| .....agguaaaggaaguuggugaccugGug.....  | 2    | 1 | seq |
| .....Ggguuaaggaaguuggugaccugaug.....  | 1    | 1 | seq |
| .....Ugguuaaggaaguuggugaccugaug.....  | 1    | 1 | seq |
| .....agguaaaggaaguuggugaccugaCg.....  | 3    | 1 | seq |
| .....agguaaaggaaguuggugaccugauga..... | 6    | 0 | seq |
| .....agguaaaggaaguuggugaccugaugG..... | 2    | 1 | seq |
| .....gguuaGggaaguuggug.....           | 1    | 1 | seq |
| .....gguuaaggaaguugggAg.....          | 1    | 1 | seq |
| .....gguuaaggaaguugguA.....           | 2    | 1 | seq |
| .....gguuaaaggaaguuggug.....          | 56   | 0 | seq |
| .....gguuaaggaaguugguU.....           | 2    | 1 | seq |
| .....gguuaaggaaguugguga.....          | 21   | 0 | seq |
| .....gguuaaaggaaguuggugG.....         | 1    | 1 | seq |
| .....gguuaaggaaguuggugaU.....         | 1    | 1 | seq |
| .....gguuaaggaaguuggugac.....         | 13   | 0 | seq |
| .....gguuaaaggaaguuggugGc.....        | 1    | 1 | seq |
| .....gguuaaggaaguuggugacc.....        | 5    | 0 | seq |
| .....gguuaaggaaguuggugaccG.....       | 4    | 1 | seq |
| .....gguuaaaggaaguuggCgaccu.....      | 1    | 1 | seq |
| .....gguuaaggaaguuggugaccC.....       | 7    | 1 | seq |
| .....gguuaaggaaguuggugUccu.....       | 1    | 1 | seq |
| .....gguuaaaggaaguuggugaccu.....      | 40   | 0 | seq |
| .....gguuaaaggaaguuggugaccCg.....     | 15   | 1 | seq |
| .....gguuaaggaaguCggugaccug.....      | 1    | 1 | seq |
| .....gguuaaaggaaguuggugaccug.....     | 1157 | 0 | seq |
| .....Cguuaaggaaguuggugaccug.....      | 1    | 1 | seq |
| .....gguCaaggaaguuggugaccug.....      | 2    | 1 | seq |
| .....gguuaagUaaguuggugaccug.....      | 2    | 1 | seq |
| .....gguuaaggaGguuggugaccug.....      | 8    | 1 | seq |
| .....gguuaaggaaguuggGgaccug.....      | 2    | 1 | seq |
| .....gguuaaaggaaguuggugaccAg.....     | 5    | 1 | seq |
| .....gguuaaggaaguuggugaccAug.....     | 1    | 1 | seq |
| .....gguuaaggaaguuggugaccGg.....      | 10   | 1 | seq |
| .....ggGuaaggaaguuggugaccug.....      | 3    | 1 | seq |
| .....gguuaaggaaguuggugaccGug.....     | 1    | 1 | seq |
| .....ggCuaaggaaguuggugaccug.....      | 2    | 1 | seq |
| .....gguuaaggGaguuggugaccug.....      | 3    | 1 | seq |
| .....gguGaaggaaguuggugaccug.....      | 1    | 1 | seq |
| .....gguuGaggaaguuggugaccug.....      | 4    | 1 | seq |
| .....gguuaaaggaaguuggugaccuU.....     | 15   | 1 | seq |
| .....gguuaaggaaguuggCgaccug.....      | 4    | 1 | seq |
| .....gguuaGggaaguuggugaccug.....      | 5    | 1 | seq |

## Star

## Mature

acacaagucuccaaaaaucauaagaccagugaugagggcugacaccuucccaguuuuuaagguaaggaaguuggugaccugaugauggggaaccaacgacugaa

|                                      |     |   |     |
|--------------------------------------|-----|---|-----|
| .....gguaaaggaaguuggugaccuC.....     | 8   | 1 | seq |
| .....gguuUaggaaguuggugaccug.....     | 1   | 1 | seq |
| .....gguaaaggaaguuggugaccug.....     | 1   | 1 | seq |
| .....gguaaaggaaguuggugGccug.....     | 7   | 1 | seq |
| .....gguaaUggaaguuggugaccug.....     | 1   | 1 | seq |
| .....gguaaaggaaguUgugaccug.....      | 1   | 1 | seq |
| .....Aguaaaggaaguuggugaccug.....     | 1   | 1 | seq |
| .....gguaaaggaaguuggugaccugG.....    | 2   | 1 | seq |
| .....gguaaaggaaguuggugaccugC.....    | 1   | 1 | seq |
| .....gguuGaggaaguuggugaccuga.....    | 1   | 1 | seq |
| .....ggGuaaggaaguuggugaccuga.....    | 1   | 1 | seq |
| .....Aguaaaggaaguuggugaccuga.....    | 1   | 1 | seq |
| .....gguaaaggaaguuggugaccuga.....    | 125 | 0 | seq |
| .....gguaaaggaaguuggugaccugaC.....   | 7   | 1 | seq |
| .....gguaaaggaaguuggugaccugau.....   | 1   | 1 | seq |
| .....gguaaggaaguuggugaccugau.....    | 1   | 1 | seq |
| .....gguaaaggaaguuggugaccugau.....   | 58  | 0 | seq |
| .....gguaaaggaaguuggugaccugUu.....   | 1   | 1 | seq |
| .....gguaaaggaaguCggugaccugaug.....  | 1   | 1 | seq |
| .....gguaaaggaaguuggugaccugGug.....  | 1   | 1 | seq |
| .....gguaaaggaaguuggugaccugaug.....  | 396 | 0 | seq |
| .....gguaaaggaaguuggGgaccugaug.....  | 3   | 1 | seq |
| .....gguaaGggaaguuggugaccugaug.....  | 2   | 1 | seq |
| .....gguaaaggaagCugugaccugaug.....   | 1   | 1 | seq |
| .....gguaaaggaCguuggugaccugaug.....  | 1   | 1 | seq |
| .....gguaaaggaaguuggugaccGgaug.....  | 1   | 1 | seq |
| .....gguaaaggaagAuggugaccugaug.....  | 1   | 1 | seq |
| .....gguaaaggaaguuggugaccugaGg.....  | 1   | 1 | seq |
| .....gguaaaggaaguuggugGccugaug.....  | 3   | 1 | seq |
| .....gguaaaggaAuuggugaccugaug.....   | 1   | 1 | seq |
| .....gguaaaggaGguuggugaccugaug.....  | 2   | 1 | seq |
| .....gguaaaggaaguuggugaccugaCg.....  | 1   | 1 | seq |
| .....Aguaaaggaaguuggugaccugaug.....  | 1   | 1 | seq |
| .....gguaaaggaaguuggugaccCgaug.....  | 1   | 1 | seq |
| .....gguaaaggGaguuggugaccugaug.....  | 2   | 1 | seq |
| .....gguaaaggaaguuggugaccugaugU..... | 1   | 1 | seq |
| .....gguaaaggaaguuggugaccugCuga..... | 1   | 1 | seq |
| .....gguaaaggaaguuggugaccugauga..... | 23  | 0 | seq |
| .....guuaaggaaguugguga.....          | 9   | 0 | seq |
| .....guuaaggaaguuggugaU.....         | 1   | 1 | seq |
| .....guuaaggaaguuggugac.....         | 1   | 0 | seq |
| .....guuaaggaaguuggugacc.....        | 12  | 0 | seq |
| .....Uuuuaaggaaguuggugacc.....       | 1   | 1 | seq |
| .....guuaaggaaguuggugacA.....        | 1   | 1 | seq |
| .....guCaaggaaguuggugaccu.....       | 1   | 1 | seq |
| .....guuaaggGaguuggugaccu.....       | 1   | 1 | seq |
| .....guuaaggaaguuggugaccG.....       | 1   | 1 | seq |
| .....guuaaggaaguuggugaccC.....       | 3   | 1 | seq |
| .....guuaaggaaguuggugaccu.....       | 20  | 0 | seq |
| .....guuaaggGaguuggugaccug.....      | 1   | 1 | seq |
| .....guuaaggaaguuggugaccCg.....      | 2   | 1 | seq |
| .....guuaaggaGguuggugaccug.....      | 1   | 1 | seq |
| .....guuaaggaaguuggugaccuU.....      | 1   | 1 | seq |
| .....guuaUggaaguuggugaccug.....      | 1   | 1 | seq |
| .....guuaaggaaguugguUaccug.....      | 1   | 1 | seq |
| .....guuaaggaaguuggugaccug.....      | 88  | 0 | seq |
| .....Auuaaggaaguuggugaccug.....      | 1   | 1 | seq |
| .....guuaaggaaguuggugacGug.....      | 1   | 1 | seq |
| .....guuaaggaaguuggGgaccug.....      | 2   | 1 | seq |
| .....guuaaggaaguuggugaccAg.....      | 1   | 1 | seq |
| .....Uuuuaaggaaguuggugaccug.....     | 1   | 1 | seq |
| .....guuaUggaaguuggugaccuga.....     | 1   | 1 | seq |
| .....guuaaggaaguuggugaccugG.....     | 2   | 1 | seq |
| .....guuaaggaaguuggugaccuga.....     | 13  | 0 | seq |
| .....guuaaggaGguuggugaccugau.....    | 1   | 1 | seq |
| .....guuaaggaaguuggugaccugaC.....    | 4   | 1 | seq |
| .....guuaaggaaguUAgugaccugau.....    | 1   | 1 | seq |
| .....guuaaggaaguuggugaccugGu.....    | 1   | 1 | seq |
| .....guuaaggaaguuggugaccugau.....    | 30  | 0 | seq |
| .....guuaaggaaguuggGgaccugaug.....   | 1   | 1 | seq |

## Star

## Mature

acacaagucuccaaaaaucauaagaccaguaugagggcugacaccuucccaguuuuuaaggguuaaggaaguuggugaccugaugauggggaaaccaacgacugaa

|                                     |     |   |     |
|-------------------------------------|-----|---|-----|
| .....gCuaaggaaguuggugaccugaug.....  | 1   | 1 | seq |
| .....Auuaggaaguuggugaccugaug.....   | 1   | 1 | seq |
| .....guuaaggaaguuggugaccugaug.....  | 80  | 0 | seq |
| .....guuaaggaaguuggugaccugaCg.....  | 1   | 1 | seq |
| .....guuaaggaaguuggugaccugauga..... | 4   | 0 | seq |
| .....uuaggaaguuggugacc.....         | 3   | 0 | seq |
| .....uuaggaaguCggugacc.....         | 1   | 1 | seq |
| .....uuaggaaguuggugacc.....         | 21  | 0 | seq |
| .....uuaggaaguuggugaccG.....        | 1   | 1 | seq |
| .....uuaggaaguuggugaccC.....        | 6   | 1 | seq |
| .....uuaggaaguuggugaccA.....        | 3   | 1 | seq |
| .....uuaggaaguuggugaccu.....        | 27  | 0 | seq |
| .....uuaggaaguuggugaccug.....       | 92  | 0 | seq |
| .....uuaggaaguuggugaccAg.....       | 1   | 1 | seq |
| .....uuaggGaguuggugaccug.....       | 1   | 1 | seq |
| .....Nuaggaaguuggugaccug.....       | 1   | 1 | seq |
| .....uuaggaaguuggugaccGg.....       | 1   | 1 | seq |
| .....uuaggaaguuggugaccGg.....       | 1   | 1 | seq |
| .....uuaggaaguuggugaccuU.....       | 2   | 1 | seq |
| .....uuaggaaguuggugaccCg.....       | 2   | 1 | seq |
| .....uuaggaaguuggugaccug.....       | 1   | 1 | seq |
| .....uuaggaaguCggugaccug.....       | 1   | 1 | seq |
| .....uuaggaaguuggugaccuga.....      | 24  | 0 | seq |
| .....uuaggaaguuggugaccugG.....      | 1   | 1 | seq |
| .....uuaggaaguuggugaccugau.....     | 9   | 0 | seq |
| .....uuaggaaguuggugaccugaC.....     | 2   | 1 | seq |
| .....uuaggaaguugguUaccugaug.....    | 1   | 1 | seq |
| .....uuaggaaguuggugaccugGug.....    | 2   | 1 | seq |
| .....uuaggaaguuggugaccugaCg.....    | 2   | 1 | seq |
| .....uuaggaaguuggugaccugaug.....    | 112 | 0 | seq |
| .....uuaggaaguugUgaccugaug.....     | 2   | 1 | seq |
| .....uuaggaaguuggCgaccugaug.....    | 1   | 1 | seq |
| .....uCaaggaaguuggugaccugaug.....   | 1   | 1 | seq |
| .....uuaggaaguugAugaccugaug.....    | 1   | 1 | seq |
| .....uuGaggaaguuggugaccugauga.....  | 1   | 1 | seq |
| .....uuaggaaguuggugaccugauga.....   | 4   | 0 | seq |
| .....uaaggaaguuggugacc.....         | 24  | 0 | seq |
| .....uaaggaagGuggugacc.....         | 1   | 1 | seq |
| .....uaaggaaguuggugaccu.....        | 14  | 0 | seq |
| .....uaaggaaguuggugaccG.....        | 2   | 1 | seq |
| .....uaaggaaguuggugaccA.....        | 1   | 1 | seq |
| .....uaaggaaguuggugaccC.....        | 7   | 1 | seq |
| .....uaaggGaguuggugaccug.....       | 1   | 1 | seq |
| .....uaaggaaguuggugaccug.....       | 75  | 0 | seq |
| .....uaaggaaguuggugaccCg.....       | 1   | 1 | seq |
| .....Aaaggaaguuggugaccug.....       | 1   | 1 | seq |
| .....Caaggaaguuggugaccug.....       | 1   | 1 | seq |
| .....Caaggaaguuggugaccuga.....      | 2   | 1 | seq |
| .....uaGggaaguuggugaccuga.....      | 1   | 1 | seq |
| .....uaaggaaguuCgugaccuga.....      | 1   | 1 | seq |
| .....uaaggaaguuggugaccuga.....      | 25  | 0 | seq |
| .....uaaggaaguuggugaccugaA.....     | 1   | 1 | seq |
| .....uaaggaaguuggugaccugau.....     | 8   | 0 | seq |
| .....uaaggaaguuggugaccugaCg.....    | 2   | 1 | seq |
| .....uaaggaaguuggCgaccugaug.....    | 1   | 1 | seq |
| .....uaaggaaguuggugaccugGug.....    | 1   | 1 | seq |
| .....uaaggaaguuggugaccugaug.....    | 148 | 0 | seq |
| .....uaaggaaguuggugaccugauU.....    | 1   | 1 | seq |
| .....Gaaggaaguuggugaccugaug.....    | 1   | 1 | seq |
| .....uaaggaaguuggugGccugaug.....    | 1   | 1 | seq |
| .....uaaggaaguuggugaccugauga.....   | 7   | 0 | seq |
| .....aaggaaguuggugaccC.....         | 3   | 1 | seq |
| .....aaggaaguuggugaccu.....         | 20  | 0 | seq |
| .....aaggaaguuggugaccG.....         | 2   | 1 | seq |
| .....aaggaaguuggugaccA.....         | 2   | 1 | seq |
| .....aaggGaguuggugaccu.....         | 1   | 1 | seq |
| .....aaggaaguuggugaccGg.....        | 1   | 1 | seq |
| .....aaggaGguuggugaccug.....        | 1   | 1 | seq |
| .....aaggaaguugguAaccug.....        | 1   | 1 | seq |
| .....aaggaaguuggugaccug.....        | 109 | 0 | seq |

## Star

## Mature

acacaagucuccaaaaaucauaagaccgauaugagggcgacaccuucccaguucuaauagguuaaggaaguuggugaccugaugauggggaaccaacgacugaa

|                                   |     |   |     |
|-----------------------------------|-----|---|-----|
| .....aaggaagCuggugaccug.....      | 1   | 1 | seq |
| .....aaggaaguuggCgaccug.....      | 1   | 1 | seq |
| .....Gaggaaguuggugaccug.....      | 1   | 1 | seq |
| .....aaggGaguuggugaccug.....      | 1   | 1 | seq |
| .....aaggaaguuggugGccug.....      | 1   | 1 | seq |
| .....aaggaaguuggugaccuU.....      | 1   | 1 | seq |
| .....aaggaaguuggugaccuC.....      | 1   | 1 | seq |
| .....aaggaaguuggugaccAg.....      | 2   | 1 | seq |
| .....aGggaaguuggugaccug.....      | 1   | 1 | seq |
| .....aaggaaguuggugaccuga.....     | 30  | 0 | seq |
| .....aaggGaguuggugaccuga.....     | 1   | 1 | seq |
| .....aaggaaguuggugaccugau.....    | 6   | 0 | seq |
| .....aaggaaguuggugaccugaug.....   | 70  | 0 | seq |
| .....aaggaaguGggugaccugaug.....   | 1   | 1 | seq |
| .....aaggaaguuggugaccugGug.....   | 2   | 1 | seq |
| .....aaggaGguuggugaccugaug.....   | 1   | 1 | seq |
| .....aaggaaguuggugaccugauga.....  | 6   | 0 | seq |
| .....aggaaguuggugaccuU.....       | 6   | 1 | seq |
| .....aggaagCuggugaccug.....       | 1   | 1 | seq |
| .....aggaaguuggGgaccug.....       | 1   | 1 | seq |
| .....aggaaguuggugaccGg.....       | 2   | 1 | seq |
| .....aggaaguugguAaccug.....       | 1   | 1 | seq |
| .....aggaaguuggugaccAg.....       | 1   | 1 | seq |
| .....aggaaguuggAgaccug.....       | 1   | 1 | seq |
| .....Nggaaguuggugaccug.....       | 1   | 1 | seq |
| .....aggaaguuggugaccCg.....       | 2   | 1 | seq |
| .....aggGaguuggugaccug.....       | 2   | 1 | seq |
| .....aggaaguuggugGccug.....       | 1   | 1 | seq |
| .....aggaaguuggugacAug.....       | 1   | 1 | seq |
| .....aggaaguuggugaccug.....       | 287 | 0 | seq |
| .....aggaaguuggCgaccug.....       | 1   | 1 | seq |
| .....aggaaguCggugaccug.....       | 1   | 1 | seq |
| .....aggaaguuggugaccuC.....       | 1   | 1 | seq |
| .....aggaGguuggugaccug.....       | 4   | 1 | seq |
| .....Gggaaguuggugaccug.....       | 2   | 1 | seq |
| .....aggaaguuggugaccugG.....      | 2   | 1 | seq |
| .....aggaGguuggugaccuga.....      | 3   | 1 | seq |
| .....aggaaguuggugaccuga.....      | 111 | 0 | seq |
| .....aggaaguAaggugaccuga.....     | 1   | 1 | seq |
| .....aggaaguuggugaccugaG.....     | 2   | 1 | seq |
| .....aggaaguuggugaccugaC.....     | 3   | 1 | seq |
| .....aggaaguuggugaccugau.....     | 25  | 0 | seq |
| .....aggaGguuggugaccugaug.....    | 1   | 1 | seq |
| .....Gggaaguuggugaccugaug.....    | 1   | 1 | seq |
| .....aggaaguuggugaccugaCg.....    | 4   | 1 | seq |
| .....aggaaguuggugaccCgaug.....    | 1   | 1 | seq |
| .....agAaguuggugaccugaug.....     | 1   | 1 | seq |
| .....aggaaguuggugaccugaGg.....    | 1   | 1 | seq |
| .....aggaaguuggugaccugaug.....    | 195 | 0 | seq |
| .....aggaaguuggugaccugCug.....    | 1   | 1 | seq |
| .....aggGaguuggugaccugaug.....    | 1   | 1 | seq |
| .....aggaaguuggugGccugaug.....    | 1   | 1 | seq |
| .....aggaaguuggugaccugaugU.....   | 1   | 1 | seq |
| .....aggaaguuggugaccugaugG.....   | 1   | 1 | seq |
| .....aggaaguuggugGccugauga.....   | 1   | 1 | seq |
| .....aggaaguuggugaccugauga.....   | 16  | 0 | seq |
| .....aggaaguuggugaccugaugggg..... | 1   | 0 | seq |
| .....ggaaguuggugaccuga.....       | 51  | 0 | seq |
| .....ggaaguuggugaccuUa.....       | 1   | 1 | seq |
| .....ggaaguuggugaccugG.....       | 2   | 1 | seq |
| .....ggaaguuggugaccugU.....       | 1   | 1 | seq |
| .....ggaaguuggugaccugau.....      | 26  | 0 | seq |
| .....ggaaguuggugaccugaC.....      | 1   | 1 | seq |
| .....ggaaguuggugaccugaCg.....     | 1   | 1 | seq |
| .....ggGaguuggugaccugaug.....     | 1   | 1 | seq |
| .....ggaaguuggugaccugaGg.....     | 2   | 1 | seq |
| .....ggaaguugAugaccugaug.....     | 1   | 1 | seq |
| .....ggaaguuggugaccugaug.....     | 116 | 0 | seq |
| .....ggaaguuggugGccugaug.....     | 1   | 1 | seq |
| .....ggaaguuggugaccCgaug.....     | 2   | 1 | seq |

## Star

## Mature

|                                                                                                                                    |    |   |     |
|------------------------------------------------------------------------------------------------------------------------------------|----|---|-----|
| acacaagucuccaaaaaucauaagacc <u>g</u> uaugagggcugacaccuucccag <u>u</u> cuauaagguuaaggaag <u>u</u> ggugaccugaugauggggaaaccaacgacugaa |    |   |     |
| .....ggaaguuggugaccGgauga.....                                                                                                     | 1  | 1 | seq |
| .....ggaaguuggugaccuga <u>g</u> a.....                                                                                             | 17 | 0 | seq |
| .....ggaaguuggugaccuga <u>U</u> .....                                                                                              | 1  | 1 | seq |
| .....gaaguuggugaccugaC.....                                                                                                        | 3  | 1 | seq |
| .....gaaguuggugaccuga <u>u</u> .....                                                                                               | 13 | 0 | seq |
| .....gaaguuggCgaccuga <u>g</u> .....                                                                                               | 1  | 1 | seq |
| .....gaagCuggugaccuga <u>g</u> .....                                                                                               | 1  | 1 | seq |
| .....gUaguuggugaccuga <u>g</u> .....                                                                                               | 1  | 1 | seq |
| .....gaaguuggugaccugG <u>u</u> g.....                                                                                              | 1  | 1 | seq |
| .....gaaguuggugaccugaCg.....                                                                                                       | 2  | 1 | seq |
| .....Naaguuggugaccuga <u>g</u> .....                                                                                               | 1  | 1 | seq |
| .....gaaguuggugaccuga <u>g</u> .....                                                                                               | 63 | 0 | seq |
| .....gaaguuggugaccuga <u>g</u> a.....                                                                                              | 5  | 0 | seq |
| .....aaguuggugaccugG <u>u</u> g.....                                                                                               | 1  | 1 | seq |
| .....aaguuggugaccuga <u>g</u> .....                                                                                                | 42 | 0 | seq |
| .....aaguuggugaccuga <u>g</u> a.....                                                                                               | 5  | 0 | seq |
| .....aguuggugaccugaG <u>g</u> a.....                                                                                               | 1  | 1 | seq |
| .....aguuggugaccuga <u>U</u> .....                                                                                                 | 1  | 1 | seq |
| .....aguuggugaccuga <u>g</u> a.....                                                                                                | 10 | 0 | seq |

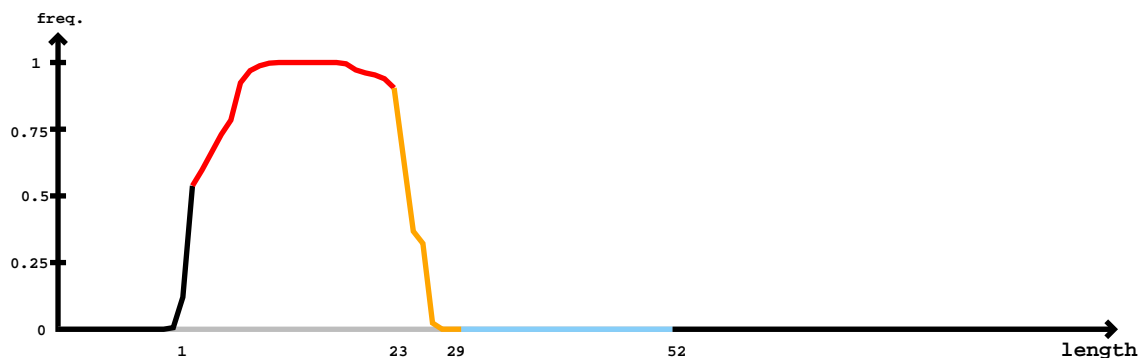

Star

| 5'                                                                                                             | -3'   | exp |        |
|----------------------------------------------------------------------------------------------------------------|-------|-----|--------|
| ccagguucuaaaggguuaaggaagguugugacccugaugauggggaacccaacgcagcugaagccucuaugaauguugucacacuaaauuuucuuacaggcagaaaaauu | reads | mm  | sample |
| .(((((((.(((((((.((.(((((((.((((.....)))...)))))).))..)))))).)))))))).(((((((.....))))))....                   | 2     | 0   | seq    |
| .....aagguuaaggaagguuggu.....                                                                                  | 4     | 0   | seq    |
| .....aagguuaaggaagguugguA.....                                                                                 | 1     | 1   | seq    |
| .....aagguuaaggaagguugguGa.....                                                                                | 1     | 0   | seq    |
| .....aagguuGaggaagguugguGac.....                                                                               | 1     | 1   | seq    |
| .....aagguuaaggaagguugguGac.....                                                                               | 1     | 0   | seq    |
| .....CagguuaaggaagguugguGaccug.....                                                                            | 1     | 1   | seq    |
| .....aagguuaaggaagguugguGaccuC.....                                                                            | 1     | 1   | seq    |
| .....aagguuaaggaagguugguGaccug.....                                                                            | 3     | 0   | seq    |
| .....aagguuaaggaagguugguGaccuga.....                                                                           | 2     | 0   | seq    |
| .....GagguuaaggaagguugguGaccuga.....                                                                           | 1     | 1   | seq    |
| .....aagguuaaggaagguugguGaccugaug.....                                                                         | 12    | 0   | seq    |
| .....agguuaUggaagguuggu.....                                                                                   | 1     | 1   | seq    |
| .....agguuaaggaagguugggC.....                                                                                  | 1     | 1   | seq    |
| .....agguuaaggaagguuggu.....                                                                                   | 20    | 0   | seq    |
| .....agguuaaggaagguugggGg.....                                                                                 | 1     | 1   | seq    |
| .....agguuaaggaagguugguA.....                                                                                  | 2     | 1   | seq    |
| .....agguuaaggaagguugggAg.....                                                                                 | 1     | 1   | seq    |
| .....agguuaaggaagguugguG.....                                                                                  | 40    | 0   | seq    |
| .....agguuaaggaagguugggCg.....                                                                                 | 1     | 1   | seq    |
| .....agguuaaggaagguugguU.....                                                                                  | 1     | 1   | seq    |
| .....agguuaaggaagguugguGa.....                                                                                 | 21    | 0   | seq    |
| .....agguuaaggaagguugguGg.....                                                                                 | 1     | 1   | seq    |
| .....agAuaaggaagguugguGa.....                                                                                  | 1     | 1   | seq    |
| .....agguuaaggaagguugguGac.....                                                                                | 15    | 0   | seq    |
| .....agguCaaggaagguugguGac.....                                                                                | 1     | 1   | seq    |
| .....agguuaaggaagguugguGacc.....                                                                               | 5     | 0   | seq    |
| .....agguuaaggaagguugguGaccA.....                                                                              | 1     | 1   | seq    |
| .....agguuaaggaagguugguGaccu.....                                                                              | 1     | 0   | seq    |
| .....agguuaaggaagguugggCgaccug.....                                                                            | 1     | 1   | seq    |
| .....agguuaaggaGguugguGaccug.....                                                                              | 1     | 1   | seq    |
| .....agguuaaggaagguugguGaccCg.....                                                                             | 1     | 1   | seq    |
| .....agguuaaggaagguugguGaUcug.....                                                                             | 1     | 1   | seq    |
| .....agguuaaggaagguugguGaccGg.....                                                                             | 1     | 1   | seq    |



## Mature

## Star

ccaguucuaaaggguuaagggaagugggugaccugaugauggggaaaccaacgcacugaagccucuaugaaauugugucacaaucuaaaauuucucaggcagaaaaauu

|                                         |      |   |     |
|-----------------------------------------|------|---|-----|
| .....aggguuaagggaagugggugaccug.....     | 96   | 0 | seq |
| .....aggguuaagggaagugggugaccuC.....     | 1    | 1 | seq |
| .....aggguuaGggaagugggugaccug.....      | 1    | 1 | seq |
| .....aggguuaagggaagugggugaccuCa.....    | 1    | 1 | seq |
| .....aggguuaagggaagCuggugaccuga.....    | 1    | 1 | seq |
| .....aggAuaagggaagugggugaccuga.....     | 1    | 1 | seq |
| .....aggguuaagggaagugggugaccCga.....    | 1    | 1 | seq |
| .....aggguuaagggaagugggugaccuga.....    | 140  | 0 | seq |
| .....aggCuaagggaagugggugaccuga.....     | 1    | 1 | seq |
| .....Gggguuaagggaagugggugaccuga.....    | 1    | 1 | seq |
| .....aggguuaagggaagugggugaccugG.....    | 5    | 1 | seq |
| .....aggguuaagggaagugggugUccuga.....    | 1    | 1 | seq |
| .....aggguuaagggaGguuggugaccuga.....    | 2    | 1 | seq |
| .....aggguuaagggaagugggugaccAga.....    | 1    | 1 | seq |
| .....aggguuaagggaagugggugaccugaG.....   | 1    | 1 | seq |
| .....aggguuaagggaagugggCgaccugau.....   | 1    | 1 | seq |
| .....aggCuaagggaagugggugaccugau.....    | 1    | 1 | seq |
| .....Ngguuaagggaagugggugaccugau.....    | 1    | 1 | seq |
| .....aggguuaagggaagugggugaccugau.....   | 16   | 0 | seq |
| .....aggguuaagggaagugggugaccugaC.....   | 2    | 1 | seq |
| .....aggguuaagUaagugggugaccugaug.....   | 1    | 1 | seq |
| .....aAguuaagggaagugggugaccugaug.....   | 1    | 1 | seq |
| .....aggguuaagggaagugggugaccugaCg.....  | 3    | 1 | seq |
| .....aggguuaagggaagugggugaccugGug.....  | 2    | 1 | seq |
| .....aggguCaagggaagugggugaccugaug.....  | 1    | 1 | seq |
| .....aggguuaagggaagugggugaccugaug.....  | 150  | 0 | seq |
| .....Gggguuaagggaagugggugaccugaug.....  | 1    | 1 | seq |
| .....Uggguuaagggaagugggugaccugaug.....  | 1    | 1 | seq |
| .....aggguuaagggaagugguUaccugaug.....   | 1    | 1 | seq |
| .....aggguuaagggaagugggugGccugaug.....  | 1    | 1 | seq |
| .....aggguuaagggaagugggugaccugauga..... | 6    | 0 | seq |
| .....aggguuaagggaagugggugaccugaugG..... | 2    | 1 | seq |
| .....ggguuaagggaagugggU.....            | 2    | 1 | seq |
| .....ggguuaagggaagugggAg.....           | 1    | 1 | seq |
| .....ggguuaGggaagugggug.....            | 1    | 1 | seq |
| .....ggguuaagggaagugggUA.....           | 2    | 1 | seq |
| .....ggguuaagggaagugggug.....           | 56   | 0 | seq |
| .....ggguuaagggaaguggguga.....          | 21   | 0 | seq |
| .....ggguuaagggaagugggugG.....          | 1    | 1 | seq |
| .....ggguuaagggaagugggugGc.....         | 1    | 1 | seq |
| .....ggguuaagggaagugggugaU.....         | 1    | 1 | seq |
| .....ggguuaagggaagugggugac.....         | 13   | 0 | seq |
| .....ggguuaagggaagugggugacc.....        | 5    | 0 | seq |
| .....ggguuaagggaagugggugaccu.....       | 40   | 0 | seq |
| .....ggguuaagggaagugggugUccu.....       | 1    | 1 | seq |
| .....ggguuaagggaagugggugaccG.....       | 4    | 1 | seq |
| .....ggguuaagggaagugggCgaccu.....       | 1    | 1 | seq |
| .....ggguuaagggaagugggugaccC.....       | 7    | 1 | seq |
| .....ggguuaaggGaguuggugaccug.....       | 3    | 1 | seq |
| .....ggguuaagggaaguuUgugaccug.....      | 1    | 1 | seq |
| .....ggguuaagggaagugggugaccGg.....      | 10   | 1 | seq |
| .....ggguuaagggaagugggGgaccug.....      | 2    | 1 | seq |
| .....ggguCaagggaagugggugaccug.....      | 2    | 1 | seq |
| .....ggguuaagggaagugggugaccuC.....      | 8    | 1 | seq |
| .....ggguuaagggaagugggugaccCg.....      | 15   | 1 | seq |
| .....ggguuaagggaagugggugaccAg.....      | 5    | 1 | seq |
| .....ggguGaagggaagugggugaccug.....      | 1    | 1 | seq |
| .....ggguuaagggaGguuggugaccug.....      | 8    | 1 | seq |
| .....ggGuuaagggaagugggugaccug.....      | 3    | 1 | seq |
| .....ggguuaUggaagugggugaccug.....       | 1    | 1 | seq |
| .....ggguuaagggaagugggugGccug.....      | 7    | 1 | seq |
| .....Cguuaagggaagugggugaccug.....       | 1    | 1 | seq |
| .....ggguuaagggaagugggugaccAug.....     | 1    | 1 | seq |
| .....ggguuaagggaagugggugaccGug.....     | 1    | 1 | seq |
| .....ggguuaGggaagugggugaccug.....       | 5    | 1 | seq |
| .....ggguUaggaagugggugaccug.....        | 1    | 1 | seq |
| .....Aguuaagggaagugggugaccug.....       | 1    | 1 | seq |
| .....ggguuaagggaagugggugaccug.....      | 1157 | 0 | seq |
| .....ggguuaagggaagugggugaccuU.....      | 15   | 1 | seq |
| .....ggguuaagggaagugggCgaccug.....      | 4    | 1 | seq |

## Mature

## Star

ccaguucuaaaggguuaagggaagugggugaccugaugauggggaaaccaacgacugaagccucuaugaaauugugucacaaucuaaaauucuuacaggcagaaaauu

|                                        |     |   |     |
|----------------------------------------|-----|---|-----|
| .....ggCuaaggaagugggugaccug.....       | 2   | 1 | seq |
| .....gguuGaggaagugggugaccug.....       | 4   | 1 | seq |
| .....gguuaaagggaaguCggugaccug.....     | 1   | 1 | seq |
| .....gguuaaagUaagugggugaccug.....      | 2   | 1 | seq |
| .....gguuaaagggaagugAugaccug.....      | 1   | 1 | seq |
| .....gguuaaagggaagugggugaccugG.....    | 2   | 1 | seq |
| .....Aguuaaggaagugggugaccuga.....      | 1   | 1 | seq |
| .....gguuaaagggaagugggugaccuga.....    | 125 | 0 | seq |
| .....gguuGaggaagugggugaccuga.....      | 1   | 1 | seq |
| .....ggGuaaggaagugggugaccuga.....      | 1   | 1 | seq |
| .....gguuaaagggaagugggugaccugC.....    | 1   | 1 | seq |
| .....gguuaaagggaaguAaggugaccugau.....  | 1   | 1 | seq |
| .....gguGaaggaagugggugaccugau.....     | 1   | 1 | seq |
| .....gguuaaagggaagugggugaccugUu.....   | 1   | 1 | seq |
| .....gguuaaagggaagugggugaccugau.....   | 58  | 0 | seq |
| .....gguuaaagggaagugggugaccugaC.....   | 7   | 1 | seq |
| .....gguuaaagggaagugggugaccGgaug.....  | 1   | 1 | seq |
| .....gguuaaagggaagAuggugaccugaug.....  | 1   | 1 | seq |
| .....gguuaaagggaaguCggugaccugaug.....  | 1   | 1 | seq |
| .....gguuaaagggaauAugggugaccugaug..... | 1   | 1 | seq |
| .....gguuGggaagugggugaccugaug.....     | 2   | 1 | seq |
| .....gguuaaagggaagCuggugaccugaug.....  | 1   | 1 | seq |
| .....gguuaaagggaagugggugaccugaug.....  | 396 | 0 | seq |
| .....Aguuaaggaagugggugaccugaug.....    | 1   | 1 | seq |
| .....gguuaaagggaagugggugaccCgaug.....  | 1   | 1 | seq |
| .....gguuaaagggaagugggugaccugGu.....   | 1   | 1 | seq |
| .....gguuaaagggaCguuggugaccugaug.....  | 1   | 1 | seq |
| .....gguuaaaggGaguuggugaccugaug.....   | 2   | 1 | seq |
| .....gguuaaagggaagugggugaccugaCg.....  | 1   | 1 | seq |
| .....gguuaaagggaGguuggugaccugaug.....  | 2   | 1 | seq |
| .....gguuaaagggaagugggugGccugaug.....  | 3   | 1 | seq |
| .....gguuaaagggaagugggugaccugaGg.....  | 1   | 1 | seq |
| .....gguuaaagggaagugggCgaccugaug.....  | 3   | 1 | seq |
| .....gguuaaagggaagugggugaccugCuga..... | 1   | 1 | seq |
| .....gguuaaagggaagugggugaccugaUG.....  | 1   | 1 | seq |
| .....gguuaaagggaagugggugaccugauga..... | 23  | 0 | seq |
| .....guuaagggaaguggguga.....           | 9   | 0 | seq |
| .....guuaagggaagugggugaU.....          | 1   | 1 | seq |
| .....guuaagggaagugggugac.....          | 1   | 0 | seq |
| .....guuaagggaagugggugacA.....         | 1   | 1 | seq |
| .....guuaagggaagugggugacc.....         | 12  | 0 | seq |
| .....Uuuagggaagugggugacc.....          | 1   | 1 | seq |
| .....guCaagggaagugggugaccu.....        | 1   | 1 | seq |
| .....guuaagggaagugggugaccC.....        | 3   | 1 | seq |
| .....guuaagggaagugggugaccu.....        | 20  | 0 | seq |
| .....guuaagggaagugggugaccG.....        | 1   | 1 | seq |
| .....guuaaggGaguuggugaccu.....         | 1   | 1 | seq |
| .....guuaUggaagugggugaccug.....        | 1   | 1 | seq |
| .....guuaagggaagugguUaccug.....        | 1   | 1 | seq |
| .....Uuuagggaagugggugaccug.....        | 1   | 1 | seq |
| .....guuaagggaagugggugaccuU.....       | 1   | 1 | seq |
| .....guuaagggaagugggugaccug.....       | 88  | 0 | seq |
| .....guuaagggaGguuggugaccug.....       | 1   | 1 | seq |
| .....guuaagggaagugggCgaccug.....       | 2   | 1 | seq |
| .....Auuaagggaagugggugaccug.....       | 1   | 1 | seq |
| .....guuaagggaagugggugaccAg.....       | 1   | 1 | seq |
| .....guuaagggaagugggugacGu.....        | 1   | 1 | seq |
| .....guuaagggaagugggugaccCg.....       | 2   | 1 | seq |
| .....guuaaggGaguuggugaccug.....        | 1   | 1 | seq |
| .....guuaagggaagugggugaccugG.....      | 2   | 1 | seq |
| .....guuaagggaagugggugaccuga.....      | 13  | 0 | seq |
| .....guuaUggaagugggugaccuga.....       | 1   | 1 | seq |
| .....guuaagggaagugggugaccugaC.....     | 4   | 1 | seq |
| .....guuaagggaagugggugaccugau.....     | 30  | 0 | seq |
| .....guuaagggaGguuggugaccugau.....     | 1   | 1 | seq |
| .....guuaagggaaguuAugugaccugau.....    | 1   | 1 | seq |
| .....guuaagggaagugggugaccugGu.....     | 1   | 1 | seq |
| .....guuaagggaagugggCgaccugaug.....    | 1   | 1 | seq |
| .....guuaagggaagugggugaccugaCg.....    | 1   | 1 | seq |
| .....gCuaagggaagugggugaccugaug.....    | 1   | 1 | seq |

## Mature

## Star

ccaguucuaaaggguuaaggaagugggugaccugaugauggggaaccaacgacugaagccucuaugaaauugugucacaaacuaaaauuucuccaggcagaaaaauu

|                                     |     |   |     |
|-------------------------------------|-----|---|-----|
| .....guuaaggaagugggugaccugaug.....  | 80  | 0 | seq |
| .....Auuaaggaagugggugaccugaug.....  | 1   | 1 | seq |
| .....guuaaggaagugggugaccugauga..... | 4   | 0 | seq |
| .....uuaaggaagugggugac.....         | 3   | 0 | seq |
| .....uuaaggaaguCggugacc.....        | 1   | 1 | seq |
| .....uuaaggaagugggugacc.....        | 21  | 0 | seq |
| .....uuaaggaagugggugaccC.....       | 6   | 1 | seq |
| .....uuaaggaagugggugaccA.....       | 3   | 1 | seq |
| .....uuaaggaagugggugaccG.....       | 1   | 1 | seq |
| .....uuaaggaagugggugaccu.....       | 27  | 0 | seq |
| .....uuaaggaagugggugacGug.....      | 1   | 1 | seq |
| .....uuaaggaagugggugaccGg.....      | 1   | 1 | seq |
| .....uuaaggaagugggugaccAg.....      | 1   | 1 | seq |
| .....Nuuaaggaagugggugaccug.....     | 1   | 1 | seq |
| .....uuaGggaagugggugaccug.....      | 1   | 1 | seq |
| .....uuaaggaagugggugaccug.....      | 92  | 0 | seq |
| .....uuaaggGaguugggugaccug.....     | 1   | 1 | seq |
| .....uuaaggaaguCggugaccug.....      | 1   | 1 | seq |
| .....uuaaggaagugggugaccCg.....      | 2   | 1 | seq |
| .....uuaaggaagugggugaccuU.....      | 2   | 1 | seq |
| .....uuaaggaagugggugaccuga.....     | 24  | 0 | seq |
| .....uuaaggaagugggugaccugG.....     | 1   | 1 | seq |
| .....uuaaggaagugggugaccugau.....    | 9   | 0 | seq |
| .....uuaaggaagugggugaccugaC.....    | 2   | 1 | seq |
| .....uuaaggaagugggugaccugaug.....   | 112 | 0 | seq |
| .....uCaaggaagugggugaccugaug.....   | 1   | 1 | seq |
| .....uuaaggaagugUgaccugaug.....     | 2   | 1 | seq |
| .....uuaaggaagugguUaccugaug.....    | 1   | 1 | seq |
| .....uuaaggaagugggugaccugaCg.....   | 2   | 1 | seq |
| .....uuaaggaagugggugaccugGug.....   | 2   | 1 | seq |
| .....uuaaggaagugggCgaccugaug.....   | 1   | 1 | seq |
| .....uuaaggaaguggAugaccugaug.....   | 1   | 1 | seq |
| .....uuaaggaagugggugaccugauga.....  | 4   | 0 | seq |
| .....uuGaggaagugggugaccugauga.....  | 1   | 1 | seq |
| .....uaaggaagGugggugacc.....        | 1   | 1 | seq |
| .....uaaggaagugggugacc.....         | 24  | 0 | seq |
| .....uaaggaagugggugaccC.....        | 7   | 1 | seq |
| .....uaaggaagugggugaccG.....        | 2   | 1 | seq |
| .....uaaggaagugggugaccA.....        | 1   | 1 | seq |
| .....uaaggaagugggugaccu.....        | 14  | 0 | seq |
| .....uaaggaagugggugaccug.....       | 75  | 0 | seq |
| .....Aaaggaagugggugaccug.....       | 1   | 1 | seq |
| .....uaaggaagugggugaccCg.....       | 1   | 1 | seq |
| .....Caaggaagugggugaccug.....       | 1   | 1 | seq |
| .....uaaggGaguugggugaccug.....      | 1   | 1 | seq |
| .....uaGggaagugggugaccuga.....      | 1   | 1 | seq |
| .....uaaggaagugggugaccuga.....      | 25  | 0 | seq |
| .....Caaggaagugggugaccuga.....      | 2   | 1 | seq |
| .....uaaggaaguuCgugaccuga.....      | 1   | 1 | seq |
| .....uaaggaagugggugaccugaA.....     | 1   | 1 | seq |
| .....uaaggaagugggugaccugau.....     | 8   | 0 | seq |
| .....Gaaggaagugggugaccugaug.....    | 1   | 1 | seq |
| .....uaaggaagugggugaccugGug.....    | 1   | 1 | seq |
| .....uaaggaagugggugaccugauU.....    | 1   | 1 | seq |
| .....uaaggaagugggugaccugaCg.....    | 2   | 1 | seq |
| .....uaaggaagugggugGccugaug.....    | 1   | 1 | seq |
| .....uaaggaagugggCgaccugaug.....    | 1   | 1 | seq |
| .....uaaggaagugggugaccugaug.....    | 148 | 0 | seq |
| .....uaaggaagugggugaccugauga.....   | 7   | 0 | seq |
| .....aaggaagugggugaccG.....         | 2   | 1 | seq |
| .....aaggaagugggugaccu.....         | 20  | 0 | seq |
| .....aaggGaguugggugaccu.....        | 1   | 1 | seq |
| .....aaggaagugggugaccC.....         | 3   | 1 | seq |
| .....aaggaagugggugaccA.....         | 2   | 1 | seq |
| .....aaggaagugguAaccug.....         | 1   | 1 | seq |
| .....aGggaagugggugaccug.....        | 1   | 1 | seq |
| .....aaggaagugggugaccug.....        | 109 | 0 | seq |
| .....Gaggaagugggugaccug.....        | 1   | 1 | seq |
| .....aaggaagugggugaccuC.....        | 1   | 1 | seq |
| .....aaggaagugggCgaccug.....        | 1   | 1 | seq |

## Mature

## Star

ccaguucuaaagguaaggaaugggugaccugaugaugggaaaccaacgacugaagccuccuaugaaauugugucacaaacuaaaaauucuccaggcagaaaaauu

|                                    |     |   |     |
|------------------------------------|-----|---|-----|
| .....aaggAGuuuggugaccug.....       | 1   | 1 | seq |
| .....aaggaaguuuggugGccug.....      | 1   | 1 | seq |
| .....aaggaaguuuggugaccGg.....      | 1   | 1 | seq |
| .....aaggaagCuggugaccug.....       | 1   | 1 | seq |
| .....aaggaaguuuggugaccAg.....      | 2   | 1 | seq |
| .....aaggaaguuuggugaccuU.....      | 1   | 1 | seq |
| .....aaggGaguuggugaccug.....       | 1   | 1 | seq |
| .....aaggGaguuggugaccuga.....      | 1   | 1 | seq |
| .....aaggaaguuuggugaccuga.....     | 30  | 0 | seq |
| .....aaggaaguuuggugaccugau.....    | 6   | 0 | seq |
| .....aaggaGguuggugaccugaug.....    | 1   | 1 | seq |
| .....aaggaaguuuggugaccugGug.....   | 2   | 1 | seq |
| .....aaggaaguuuggugaccugaug.....   | 1   | 1 | seq |
| .....aaggaaguuuggugaccugaug.....   | 70  | 0 | seq |
| .....aaggaaguuuggugaccugauga.....  | 6   | 0 | seq |
| .....aggaaguuuggugaccug.....       | 287 | 0 | seq |
| .....aggaGguuggugaccug.....        | 4   | 1 | seq |
| .....aggaaguuuggugaccuC.....       | 1   | 1 | seq |
| .....aggaaguuuggugGccug.....       | 1   | 1 | seq |
| .....aggaaguuugguAaccug.....       | 1   | 1 | seq |
| .....aggaaguuuggugaccuU.....       | 6   | 1 | seq |
| .....aggaaguuuggugaccGg.....       | 2   | 1 | seq |
| .....aggaaguuuggugaccAg.....       | 1   | 1 | seq |
| .....aggaaguuuggAgaccug.....       | 1   | 1 | seq |
| .....aggaaguuuggGgaccug.....       | 1   | 1 | seq |
| .....aggGaguuggugaccug.....        | 2   | 1 | seq |
| .....aggaaguCggugaccug.....        | 1   | 1 | seq |
| .....aggaaguuuggugacAug.....       | 1   | 1 | seq |
| .....aggaaguuuggugaccCg.....       | 2   | 1 | seq |
| .....Gggaaguuuggugaccug.....       | 2   | 1 | seq |
| .....aggaagCuggugaccug.....        | 1   | 1 | seq |
| .....aggaaguuuggCgaccug.....       | 1   | 1 | seq |
| .....Nggaaguuuggugaccug.....       | 1   | 1 | seq |
| .....aggaaguuuggugaccuga.....      | 111 | 0 | seq |
| .....aggaaguuuggugaccugG.....      | 2   | 1 | seq |
| .....aggaaguAggugaccuga.....       | 1   | 1 | seq |
| .....aggaGguuggugaccuga.....       | 3   | 1 | seq |
| .....aggaaguuuggugaccugaC.....     | 3   | 1 | seq |
| .....aggaaguuuggugaccugaG.....     | 2   | 1 | seq |
| .....aggaaguuuggugaccugau.....     | 25  | 0 | seq |
| .....aggaaguuuggugaccugCug.....    | 1   | 1 | seq |
| .....aggaaguuuggugaccCgaug.....    | 1   | 1 | seq |
| .....aggGaguuggugaccugaug.....     | 1   | 1 | seq |
| .....Gggaaguuuggugaccugaug.....    | 1   | 1 | seq |
| .....aggaaguuuggugGccugaug.....    | 1   | 1 | seq |
| .....agAaaguuggugaccugaug.....     | 1   | 1 | seq |
| .....aggaGguuggugaccugaug.....     | 1   | 1 | seq |
| .....aggaaguuuggugaccugaGg.....    | 1   | 1 | seq |
| .....aggaaguuuggugaccugaCg.....    | 4   | 1 | seq |
| .....aggaaguuuggugaccugaug.....    | 195 | 0 | seq |
| .....aggaaguuuggugaccugaugU.....   | 1   | 1 | seq |
| .....aggaaguuuggugGccugauga.....   | 1   | 1 | seq |
| .....aggaaguuuggugaccugaugG.....   | 1   | 1 | seq |
| .....aggaaguuuggugaccugauga.....   | 16  | 0 | seq |
| .....aggaaguuuggugaccugaugugg..... | 1   | 0 | seq |
| .....ggaaguuuggugaccuga.....       | 51  | 0 | seq |
| .....ggaaguuuggugaccugU.....       | 1   | 1 | seq |
| .....ggaaguuuggugaccugG.....       | 2   | 1 | seq |
| .....ggaaguuuggugaccuUa.....       | 1   | 1 | seq |
| .....ggaaguuuggugaccugau.....      | 26  | 0 | seq |
| .....ggaaguuuggugaccugaC.....      | 1   | 1 | seq |
| .....ggaaguuuggugaccugaug.....     | 116 | 0 | seq |
| .....ggaaguuuggugaccugaGg.....     | 2   | 1 | seq |
| .....ggaaguuuggugGccugaug.....     | 1   | 1 | seq |
| .....ggGaguuggugaccugaug.....      | 1   | 1 | seq |
| .....ggaaguuugAugaccugaug.....     | 1   | 1 | seq |
| .....ggaaguuuggugaccugaCg.....     | 1   | 1 | seq |
| .....ggaaguuuggugaccCgaug.....     | 2   | 1 | seq |
| .....ggaaguuuggugaccugauga.....    | 17  | 0 | seq |
| .....ggaaguuuggugaccugaugU.....    | 1   | 1 | seq |

Mature

Star

|                                                                                                               |    |   |     |
|---------------------------------------------------------------------------------------------------------------|----|---|-----|
| ccaguucuaaaggguuaagggaaguuggugaccugaugauggggaaaccaacgacugaagccucuauugaauuguugucacaacuaauaaauuucucaggcagaaaaau |    |   |     |
| .....ggaaguuggugaccGgauga.....                                                                                | 1  | 1 | seq |
| .....gaaguuggugaccugau.....                                                                                   | 13 | 0 | seq |
| .....gaaguuggugaccugaC.....                                                                                   | 3  | 1 | seq |
| .....gUaguuggugaccugaug.....                                                                                  | 1  | 1 | seq |
| .....gaagCuggugaccugaug.....                                                                                  | 1  | 1 | seq |
| .....gaaguuggugaccugaug.....                                                                                  | 63 | 0 | seq |
| .....gaaguuggugaccugaCg.....                                                                                  | 2  | 1 | seq |
| .....gaaguuggCgaccugaug.....                                                                                  | 1  | 1 | seq |
| .....gaaguuggugaccugGug.....                                                                                  | 1  | 1 | seq |
| .....Naaguuggugaccugaug.....                                                                                  | 1  | 1 | seq |
| .....gaaguuggugaccugauga.....                                                                                 | 5  | 0 | seq |
| .....aaguuggugaccugGug.....                                                                                   | 1  | 1 | seq |
| .....aaguuggugaccugaug.....                                                                                   | 42 | 0 | seq |
| .....aaguuggugaccugauga.....                                                                                  | 5  | 0 | seq |
| .....aguuggugaccugauga.....                                                                                   | 10 | 0 | seq |
| .....aguuggugaccugaGga.....                                                                                   | 1  | 1 | seq |
| .....aguuggugaccugaugU.....                                                                                   | 1  | 1 | seq |

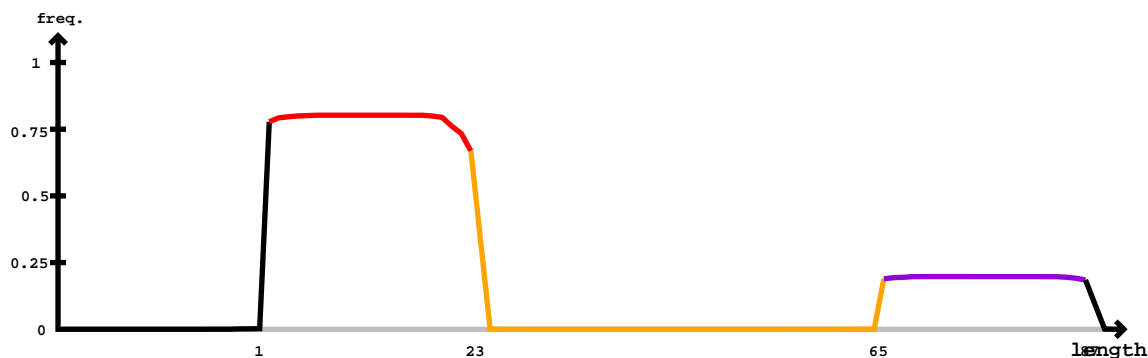

## Star

|    |                                                                                                                   |       |     |
|----|-------------------------------------------------------------------------------------------------------------------|-------|-----|
| 5' | agaggaagaggaagcgaagguguuucugacgucgaccacgugguuuacuuuaagauuugcaguaauaacccaacuaacccgaggucacgucgucaagaacaccuuu        | -3'   | obs |
|    | agaggaagaggaagcgaagguguuucugacgucgaccacgugguuuacuuuaagauuugcaguaauaacccaacuaacccgaggucacgucgucaagaacaccuuu        |       | exp |
|    | .....(((((((((((((((((((((((((((((((((((((((((((((((((((((((((((((((((((((((((((((((((((((((((((((((((((((((((((( | reads | mm  |
|    | Cgaggaagaggaagcga.....                                                                                            | 1     | 1   |
|    | .....agcgaagguguuucuga.....                                                                                       | 2     | 0   |
|    | .....agcgaagguguuucga.....                                                                                        | 1     | 1   |
|    | .....agcgaagguguuucugaG.....                                                                                      | 1     | 1   |
|    | .....agcgaagguguuucugacguc.....                                                                                   | 1     | 0   |
|    | .....cgaagguguuucugacgucA.....                                                                                    | 2     | 1   |
|    | .....cgaGgguguuucugacgucg.....                                                                                    | 1     | 1   |
|    | .....cgaagguguuucugacgucug.....                                                                                   | 15    | 0   |
|    | .....cgaagguguuucugacgucuggGcc.....                                                                               | 1     | 1   |
|    | .....gaagguguuucugacgucugg.....                                                                                   | 1     | 0   |
|    | .....gaagguguuucugacgucugA.....                                                                                   | 1     | 1   |
|    | .....gaagguguuucugacgucuggacc.....                                                                                | 4     | 0   |
|    | .....gaagguguuucugacgucuggacA.....                                                                                | 1     | 1   |
|    | .....gaagguguuucugacgucuggGcc.....                                                                                | 1     | 1   |
|    | .....aaggguCuucugacgucugga.....                                                                                   | 1     | 1   |
|    | .....aaggguuuucugacgucuggacc.....                                                                                 | 1     | 0   |
|    | .....agguCuucugacgucugg.....                                                                                      | 2     | 1   |
|    | .....agguCuucugacgucugga.....                                                                                     | 7     | 1   |
|    | .....agguCuucugacgucuggac.....                                                                                    | 1     | 1   |
|    | .....aCguguuucugacgucuggacc.....                                                                                  | 122   | 1   |
|    | .....aggguuuucugacgucuggGcc.....                                                                                  | 13    | 1   |
|    | .....gguguuucugacgucuggacU.....                                                                                   | 4     | 1   |
|    | .....gguguuucugacAucuggacc.....                                                                                   | 1     | 1   |
|    | .....gguguuucugacgucuggacc.....                                                                                   | 14    | 0   |
|    | .....gguguuucugacgucuggGcc.....                                                                                   | 3     | 1   |
|    | .....Cguguuucugacgucuggacca.....                                                                                  | 4     | 1   |
|    | .....gguguuucugacgucuggaccacg.....                                                                                | 2     | 0   |
|    | .....Cuguucugacgucugg.....                                                                                        | 1     | 1   |
|    | .....guguucugacgucuggGc.....                                                                                      | 2     | 1   |
|    | .....guguucugacgucuggGcc.....                                                                                     | 47    | 1   |
|    | .....guguucugacgucuggacc.....                                                                                     | 5     | 0   |
|    | .....guguucugacgucuggacU.....                                                                                     | 1     | 1   |
|    | .....Cuguucugacgucuggacc.....                                                                                     | 1     | 1   |

## Mature

## Star

agaggaagaggaagcgaagguguuucugacgucuggaccacgugguuuacuuuaagauuugcaguaauaacccaaucaacuaccgcgguccagucgucaagaacaccuuu

|                                       |     |   |     |
|---------------------------------------|-----|---|-----|
| .....guAuucuuugacgucucuggacc.....     | 1   | 1 | seq |
| .....guAuucuuugacgucucuggacca.....    | 1   | 1 | seq |
| .....guguuucuuugacgucucuggGcca.....   | 10  | 1 | seq |
| .....guguuucuuugacgucucuggaccaU.....  | 2   | 1 | seq |
| .....guAuucuuugacgucucuggaccac.....   | 1   | 1 | seq |
| .....guguuucuuugacgucucuggaccac.....  | 1   | 0 | seq |
| .....Cuguuucuuugacgucucuggaccacg..... | 4   | 1 | seq |
| .....guguuucuuugacgucucuggGccacg..... | 3   | 1 | seq |
| .....Auguuucuuugacgucucuggaccacg..... | 1   | 1 | seq |
| .....guUuucuuugacgucucuggaccacg.....  | 1   | 1 | seq |
| .....ugCucuugacgucucugga.....         | 1   | 1 | seq |
| .....uguuucuuugacgucCgga.....         | 1   | 1 | seq |
| .....uguuucuuugacgucAga.....          | 1   | 1 | seq |
| .....uguuucuuugacgucucuggC.....       | 1   | 1 | seq |
| .....uguuucuuugacgucucuggG.....       | 28  | 1 | seq |
| .....uguuucuuugacgCcuugga.....        | 1   | 1 | seq |
| .....uguuucuuugacgAcugga.....         | 1   | 1 | seq |
| .....uAuucuuugacgucucugga.....        | 60  | 1 | seq |
| .....uCuucuuugacgucucugga.....        | 1   | 1 | seq |
| .....uguuucuuugacgucCgga.....         | 1   | 1 | seq |
| .....uguuucugGcgucucugga.....         | 2   | 1 | seq |
| .....uguuucuuugacgucucugga.....       | 252 | 0 | seq |
| .....uguuucuuAacgucucuggac.....       | 2   | 1 | seq |
| .....uguuucCgacgucucuggac.....        | 1   | 1 | seq |
| .....uguuucuuugacgucucuggGc.....      | 163 | 1 | seq |
| .....Cguuucuuugacgucucuggac.....      | 1   | 1 | seq |
| .....uguuucuuugacgucucuggac.....      | 335 | 0 | seq |
| .....uguuucugGcgucucuggac.....        | 2   | 1 | seq |
| .....uguuucuuugacgucucuggaA.....      | 5   | 1 | seq |
| .....uguuucCgacgucucuggac.....        | 1   | 1 | seq |
| .....uAuucuuugacgucucuggac.....       | 27  | 1 | seq |
| .....uguuucuuugacgucCgga.....         | 1   | 1 | seq |
| .....uguuucuuugacgucucuggCc.....      | 1   | 1 | seq |
| .....uguuucuuugacgucAga.....          | 1   | 1 | seq |
| .....uguuucuuugacgucucuggaU.....      | 34  | 1 | seq |
| .....uguuucuuugacgucucuggaA.....      | 123 | 1 | seq |
| .....uguuucuuugacgucCgga.....         | 3   | 1 | seq |
| .....uguuGuugacgucucuggacc.....       | 2   | 1 | seq |
| .....uAuucuuugacgucucuggacc.....      | 251 | 1 | seq |
| .....uguuucGgacgucucuggacc.....       | 1   | 1 | seq |
| .....uguuucuuugCcgucucuggacc.....     | 1   | 1 | seq |
| .....uguuucuuugacgucucuggaU.....      | 429 | 1 | seq |
| .....Gguuucuuugacgucucuggacc.....     | 7   | 1 | seq |
| .....uguuucuuAacgucucuggacc.....      | 1   | 1 | seq |
| .....uguCcuugacgucucuggacc.....       | 6   | 1 | seq |
| .....uguuAuugacgucucuggacc.....       | 1   | 1 | seq |
| .....ugGuuucuuugacgucucuggacc.....    | 2   | 1 | seq |
| .....uguuucuuugaUgucucuggacc.....     | 1   | 1 | seq |
| .....uguuucuuugacguGuuggacc.....      | 1   | 1 | seq |
| .....uguuucuuugacgucucuggCcc.....     | 1   | 1 | seq |
| .....uguuucuuugGcgucucuggacc.....     | 9   | 1 | seq |
| .....uguuucuuugacgucucuggGcc.....     | 228 | 1 | seq |
| .....uguuAuucuuugacgucucuggacc.....   | 1   | 1 | seq |
| .....uguuucuuugacgucugAacc.....       | 1   | 1 | seq |
| .....uguuucCugacgucucuggacc.....      | 4   | 1 | seq |
| .....uguuUuuugacgucucuggacc.....      | 2   | 1 | seq |
| .....uguuucuuugacAucucuggacc.....     | 8   | 1 | seq |
| .....uguuucuuugacgucAggacc.....       | 3   | 1 | seq |
| .....uguuucuuugacgCcuuggacc.....      | 4   | 1 | seq |
| .....uguuucuuugacgucGggacc.....       | 2   | 1 | seq |
| .....uguuucuuugacgucuggaAc.....       | 2   | 1 | seq |
| .....ugAuucuuugacgucucuggacc.....     | 1   | 1 | seq |
| .....uguuucCgacgucucuggacc.....       | 8   | 1 | seq |
| .....Nguuucuuugacgucucuggacc.....     | 2   | 1 | seq |
| .....uguuucuuugacgucucuggacG.....     | 12  | 1 | seq |
| .....uguuucAugacgucucuggacc.....      | 1   | 1 | seq |
| .....uguuucuuugacgucuggaUc.....       | 7   | 1 | seq |
| .....uguuGcuugacgucucuggacc.....      | 1   | 1 | seq |
| .....ugCucuugacgucucuggacc.....       | 8   | 1 | seq |
| .....uguuucuuugacguUuggacc.....       | 1   | 1 | seq |

## Mature

## Star

agaggaagaggaagcgaagguuguuucugacgucuggaccacgugguuuacuuuaagauuugcaguaauaacccaucaacuaccgcgguccagucgucaagaacaccuuu

|                                  |      |   |     |
|----------------------------------|------|---|-----|
| .....uguuucugacCucuggacc.....    | 1    | 1 | seq |
| .....Aguuucugacgucuggacc.....    | 3    | 1 | seq |
| .....Cguuucugacgucuggacc.....    | 7    | 1 | seq |
| .....uguuucugacgucuggacc.....    | 2213 | 0 | seq |
| .....uguuucugacgucugCacc.....    | 6    | 1 | seq |
| .....uguuucugacgucuggGcca.....   | 256  | 1 | seq |
| .....uguuucugaUgucuggacca.....   | 3    | 1 | seq |
| .....uguuuUuugacgucuggacca.....  | 1    | 1 | seq |
| .....uguuucUgacgucuggacca.....   | 8    | 1 | seq |
| .....uguCcuugacgucuggacca.....   | 5    | 1 | seq |
| .....uguuucUgacgucuggacca.....   | 1    | 1 | seq |
| .....uguuucugacgucuggacca.....   | 1648 | 0 | seq |
| .....uguuucugCcgucuggacca.....   | 1    | 1 | seq |
| .....Cguuucugacgucuggacca.....   | 3    | 1 | seq |
| .....ugCucuugacgucuggacca.....   | 4    | 1 | seq |
| .....uguuucugacgucCggacca.....   | 6    | 1 | seq |
| .....uguuucUgacgucuggacca.....   | 3    | 1 | seq |
| .....uguuucugacgucugCacca.....   | 4    | 1 | seq |
| .....uguuucugacgucuggacAa.....   | 3    | 1 | seq |
| .....uguuucugacgucuggaccC.....   | 26   | 1 | seq |
| .....uguuucugUcgucuggacca.....   | 2    | 1 | seq |
| .....Aguuucugacgucuggacca.....   | 1    | 1 | seq |
| .....uguuuAuugacgucuggacca.....  | 1    | 1 | seq |
| .....uguuucugacgucUgacca.....    | 2    | 1 | seq |
| .....uguuucugacgucuggUcca.....   | 3    | 1 | seq |
| .....uguuucugaAgucuggacca.....   | 1    | 1 | seq |
| .....uguuucugacgucAggacca.....   | 1    | 1 | seq |
| .....uguuucugGcgucuggacca.....   | 7    | 1 | seq |
| .....uguuucugacgucuggacUa.....   | 3    | 1 | seq |
| .....uguuucugacgucuggaUca.....   | 2    | 1 | seq |
| .....uAuucugacgucuggacca.....    | 579  | 1 | seq |
| .....uguuucugacgCcuggacca.....   | 5    | 1 | seq |
| .....uguuucugacUucuggacca.....   | 1    | 1 | seq |
| .....uguuucugacgucuggaccU.....   | 43   | 1 | seq |
| .....uguuucugacgGcuggacca.....   | 1    | 1 | seq |
| .....uguuucugacgucUacca.....     | 3    | 1 | seq |
| .....uguuucugacAucuggacca.....   | 1    | 1 | seq |
| .....uguuucugacgucuggCcca.....   | 1    | 1 | seq |
| .....uguuucugacgucuggacGa.....   | 1    | 1 | seq |
| .....uguuucugacgucuggaccG.....   | 92   | 1 | seq |
| .....uguuucugacguUuggacca.....   | 1    | 1 | seq |
| .....uguuucugaUgucuggaccac.....  | 8    | 1 | seq |
| .....uAuucugacgucuggaccac.....   | 849  | 1 | seq |
| .....uguuucugacgucuggaccaG.....  | 56   | 1 | seq |
| .....Aguuucugacgucuggaccac.....  | 7    | 1 | seq |
| .....uguuucugacgucGggaccac.....  | 1    | 1 | seq |
| .....uguuucugacgucuggaGcac.....  | 1    | 1 | seq |
| .....uguuucugacgucUgaccac.....   | 5    | 1 | seq |
| .....uguuucugacCucuggaccac.....  | 1    | 1 | seq |
| .....ugAuucugacgucuggaccac.....  | 2    | 1 | seq |
| .....Cguuucugacgucuggaccac.....  | 17   | 1 | seq |
| .....uguuucugacguUuggaccac.....  | 6    | 1 | seq |
| .....uguuucugUcgucuggaccac.....  | 2    | 1 | seq |
| .....uguuucugacgucuggacGac.....  | 2    | 1 | seq |
| .....uguuucugacgucugCaccac.....  | 3    | 1 | seq |
| .....uguuucugacgucuggCccac.....  | 1    | 1 | seq |
| .....uguuucugacAucuggaccac.....  | 10   | 1 | seq |
| .....Nguuucugacgucuggaccac.....  | 5    | 1 | seq |
| .....uguuucugacgucuggaccaA.....  | 57   | 1 | seq |
| .....uguuucugacgucuggacAac.....  | 2    | 1 | seq |
| .....uguuucugacgucuggaccCc.....  | 3    | 1 | seq |
| .....uguCcuugacgucuggaccac.....  | 18   | 1 | seq |
| .....uguuuUuugacgucuggaccac..... | 3    | 1 | seq |
| .....uguuucUgacgucuggaccac.....  | 3    | 1 | seq |
| .....uguuucGugacgucuggaccac..... | 1    | 1 | seq |
| .....uguuucUgacgucuggaccac.....  | 12   | 1 | seq |
| .....uguuucAugacgucuggaccac..... | 2    | 1 | seq |
| .....uguuucugacgAcuggaccac.....  | 1    | 1 | seq |
| .....uguuucugacgucAggaccac.....  | 3    | 1 | seq |
| .....uguuucugacgGcuggaccac.....  | 1    | 1 | seq |



## Mature

## Star

agaggaagaggaagcgaagguuguuucugacgucugggaccacgugguuuacuuuaagauuugcaguaauaacccaaucaacuaccgcgguccagucgucaagaacaccuuu

|                                    |       |   |     |
|------------------------------------|-------|---|-----|
| .....ugGuccuugacgucugggaccac.....  | 4     | 1 | seq |
| .....uguuucugGcgucugggaccac.....   | 20    | 1 | seq |
| .....uguuucGgacgucugggaccac.....   | 18    | 1 | seq |
| .....uguuucugacgucuggaUcac.....    | 11    | 1 | seq |
| .....uguuucugacgugGggaccac.....    | 2     | 1 | seq |
| .....uguuucugacgucugAaccac.....    | 6     | 1 | seq |
| .....uUuucugacgucugggaccac.....    | 1     | 1 | seq |
| .....ugCuccuugacgucugggaccac.....  | 13    | 1 | seq |
| .....uguuucugacgucuggGccac.....    | 222   | 1 | seq |
| .....uguuucuuAacgucugggaccac.....  | 3     | 1 | seq |
| .....uguAcuugacgucugggaccac.....   | 2     | 1 | seq |
| .....uguuucugacguAuggaccac.....    | 1     | 1 | seq |
| .....uCuucugacgucugggaccac.....    | 1     | 1 | seq |
| .....uguuucugacgucugggaccUc.....   | 6     | 1 | seq |
| .....uguuucugacgucugggaccGc.....   | 35    | 1 | seq |
| .....uguuucugacgucugggaccaU.....   | 699   | 1 | seq |
| .....uguuucugacgucugggacUac.....   | 10    | 1 | seq |
| .....uguuGugacgucugggaccac.....    | 2     | 1 | seq |
| .....Gguucugacgucugggaccac.....    | 8     | 1 | seq |
| .....uguuucugacgucugggaccac.....   | 5927  | 0 | seq |
| .....uguuucugagGgucugggaccac.....  | 1     | 1 | seq |
| .....uguuucugacgCcgugggaccac.....  | 16    | 1 | seq |
| .....uguuucugacgucCggaccac.....    | 12    | 1 | seq |
| .....Gguucugacgucugggaccacg.....   | 83    | 1 | seq |
| .....uguuucugacgucAagaccacg.....   | 39    | 1 | seq |
| .....uguuucugacgucugggaccacA.....  | 4701  | 1 | seq |
| .....uUuucugacgucugggaccacg.....   | 4     | 1 | seq |
| .....uguuucugaGgucugggaccacg.....  | 6     | 1 | seq |
| .....uguuucugacgucuCgaccacg.....   | 5     | 1 | seq |
| .....uguuucugaUgucugggaccacg.....  | 45    | 1 | seq |
| .....uguuucugacgucugggacUacg.....  | 55    | 1 | seq |
| .....uguuucugacgGcugggaccacg.....  | 6     | 1 | seq |
| .....uguuucugacgucugUaccacg.....   | 11    | 1 | seq |
| .....uguuucugacgucuggaUcacg.....   | 36    | 1 | seq |
| .....uguuucugacgucugggacGacg.....  | 17    | 1 | seq |
| .....ugCuccuugacgucugggaccacg..... | 119   | 1 | seq |
| .....uguuucugacgucugggaccacg.....  | 50534 | 0 | seq |
| .....uguAcuugacgucugggaccacg.....  | 40    | 1 | seq |
| .....uguuucugacgucGggaccacg.....   | 13    | 1 | seq |
| .....uguuucugCcgucugggaccacg.....  | 7     | 1 | seq |
| .....Nguuucugacgucugggaccacg.....  | 58    | 1 | seq |
| .....uguuucugaAguugggaccacg.....   | 3     | 1 | seq |
| .....Aguuucugacgucugggaccacg.....  | 56    | 1 | seq |
| .....uguuucugacgucugggaccCcg.....  | 17    | 1 | seq |
| .....ugAuccuugacgucugggaccacg..... | 16    | 1 | seq |
| .....uguuucugacgucAaggaccacg.....  | 41    | 1 | seq |
| .....uguuucugacgugAuggaccacg.....  | 7     | 1 | seq |
| .....uguCcuugacgucugggaccacg.....  | 130   | 1 | seq |
| .....uguuucAagacgucugggaccacg..... | 11    | 1 | seq |
| .....uguuucugacgucugggaccaUg.....  | 258   | 1 | seq |
| .....uguuucugacCucugggaccacg.....  | 9     | 1 | seq |
| .....ugGuccuugacgucugggaccacg..... | 21    | 1 | seq |
| .....uguuUuugacgucugggaccacg.....  | 35    | 1 | seq |
| .....uguuucugacgucuggGccacg.....   | 16429 | 1 | seq |
| .....uguuucugacUucugggaccacg.....  | 7     | 1 | seq |
| .....uguuucugacAucugggaccacg.....  | 65    | 1 | seq |
| .....uguuucugacgucCggaccacg.....   | 123   | 1 | seq |
| .....uguucGugacgucugggaccacg.....  | 7     | 1 | seq |
| .....uguuucugacgucUgaccacg.....    | 1     | 1 | seq |
| .....uguuucGgacgucugggaccacg.....  | 5     | 1 | seq |
| .....uguuucugGcgucugggaccacg.....  | 245   | 1 | seq |
| .....uguuucugacgucuggUccacg.....   | 14    | 1 | seq |
| .....uguuucugacgAucugggaccacg..... | 18    | 1 | seq |
| .....uguuucugacgucugggaccaNg.....  | 2     | 1 | seq |
| .....uguuuAuugacgucugggaccacg..... | 4     | 1 | seq |
| .....uguuucugacgucuggaAacacg.....  | 7     | 1 | seq |
| .....Cguuucugacgucugggaccacg.....  | 132   | 1 | seq |
| .....uguuucUgacgucugggaccacg.....  | 116   | 1 | seq |
| .....uguuucugacgCcgugggaccacg..... | 144   | 1 | seq |
| .....uguuucugacgucugggacAacg.....  | 20    | 1 | seq |

## Mature

## Star

|                                                                                                                  |      |   |     |
|------------------------------------------------------------------------------------------------------------------|------|---|-----|
| agaggaagaggaagcgaagguuuuugacgucuggaccacgugguuuacuuuuaagauuugcaguuauaacccaaucaacuacgcgggucacagucgucagaagaacacuuuu |      |   |     |
| .....uguuucuuugacgucugAaccacg.....                                                                               | 35   | 1 | seq |
| .....uguuucuuugacgucuggCccacg.....                                                                               | 5    | 1 | seq |
| .....uguuGcuugacgucuggaccacg.....                                                                                | 15   | 1 | seq |
| .....uguuucuCgacgucuggaccacg.....                                                                                | 139  | 1 | seq |
| .....uguuucuuugUcgucuggaccacg.....                                                                               | 16   | 1 | seq |
| .....uguuucuuugacgucuggaccacGg.....                                                                              | 23   | 1 | seq |
| .....uguuucuuugacgucugCaccacg.....                                                                               | 4    | 1 | seq |
| .....uguuucuuugacgucuggaccGcg.....                                                                               | 259  | 1 | seq |
| .....uAuucuuugacgucuggaccacg.....                                                                                | 7158 | 1 | seq |
| .....uguuucuuugacgucuggaccacg.....                                                                               | 13   | 1 | seq |
| .....uguuucAugacgucuggaccacg.....                                                                                | 16   | 1 | seq |
| .....uguuucuuugacgucuggaccacU.....                                                                               | 882  | 1 | seq |
| .....uguuGuugacgucuggaccacg.....                                                                                 | 6    | 1 | seq |
| .....uguuucuuugacgucuggaccacAag.....                                                                             | 66   | 1 | seq |
| .....uguuucuuugacgucuggaccacC.....                                                                               | 425  | 1 | seq |
| .....uguuucuuugacgucuggaccUcg.....                                                                               | 36   | 1 | seq |
| .....uguuucuuUacgucuggaccacg.....                                                                                | 2    | 1 | seq |
| .....uguuucuuAacgucuggaccacg.....                                                                                | 20   | 1 | seq |
| .....uNuucuuugacgucuggaccacg.....                                                                                | 1    | 1 | seq |
| .....uguuucuuugacguUuggaccacg.....                                                                               | 22   | 1 | seq |
| .....uguuucuuugacgucuggaGcacg.....                                                                               | 8    | 1 | seq |
| .....uguuucuuugacgCuggaccacgu.....                                                                               | 2    | 1 | seq |
| .....uguGcuugacgucuggaccacggu.....                                                                               | 1    | 1 | seq |
| .....uguuucuuugacgucuggaccacgC.....                                                                              | 96   | 1 | seq |
| .....uguuucuuugacgucuggaccacCu.....                                                                              | 3    | 1 | seq |
| .....uguuucuuugacgucuggacUacgu.....                                                                              | 1    | 1 | seq |
| .....uguuucCuugacgucuggaccacggu.....                                                                             | 2    | 1 | seq |
| .....uguuucuuugacgucuggGccacgu.....                                                                              | 22   | 1 | seq |
| .....uguuucuuugacgucuggaccacUu.....                                                                              | 19   | 1 | seq |
| .....uguCcuugacgucuggaccacggu.....                                                                               | 1    | 1 | seq |
| .....uguuucuuugacgucuggaccacggu.....                                                                             | 398  | 0 | seq |
| .....uguuucuuugacgucuggaccGcggu.....                                                                             | 3    | 1 | seq |
| .....uAuucuuugacgucuggaccacggu.....                                                                              | 94   | 1 | seq |
| .....uguuucuuugacgucCggaccacgu.....                                                                              | 1    | 1 | seq |
| .....uguuucuuugGcgucuggaccacggu.....                                                                             | 1    | 1 | seq |
| .....Cguuucuuugacgucuggaccacggu.....                                                                             | 1    | 1 | seq |
| .....uguuucuuugacgucuggaccacgA.....                                                                              | 44   | 1 | seq |
| .....ugGucuuugacgucuggaccacggu.....                                                                              | 1    | 1 | seq |
| .....uguuucuCgacgucuggaccacggu.....                                                                              | 1    | 1 | seq |
| .....uguuucuuugacgucuggaccUcggu.....                                                                             | 1    | 1 | seq |
| .....Gguuucuuugacgucuggaccacggu.....                                                                             | 2    | 1 | seq |
| .....uguuucuuugacgucuggaccacgG.....                                                                              | 23   | 1 | seq |
| .....uguuucuuUacgucuggaccacggu.....                                                                              | 1    | 1 | seq |
| .....ugCucuuugacgucuggaccacggu.....                                                                              | 1    | 1 | seq |
| .....uguuucuuugacgucuggaccacgguU.....                                                                            | 24   | 1 | seq |
| .....uguuucuuugacgucuggaccacgAag.....                                                                            | 13   | 1 | seq |
| .....uguuucuuugacgucuggaccacgug.....                                                                             | 16   | 0 | seq |
| .....uguuucuuugacgucuggaccacgguC.....                                                                            | 5    | 1 | seq |
| .....uguuucuuugacgucuggGccacgug.....                                                                             | 4    | 1 | seq |
| .....uguuucuuugacgucuggaccGcgug.....                                                                             | 1    | 1 | seq |
| .....uguuucuuugacgucuggaccacgGg.....                                                                             | 9    | 1 | seq |
| .....uguuucuuugacgucuggaccacgCg.....                                                                             | 1    | 1 | seq |
| .....uguuucuuugGcgucuggaccacgug.....                                                                             | 1    | 1 | seq |
| .....uguuucuuugacgucuggaccacgguA.....                                                                            | 6    | 1 | seq |
| .....uAuucuuugacgucuggaccacgug.....                                                                              | 3    | 1 | seq |
| .....uguuucuuugacgucuggaccacgGgg.....                                                                            | 1    | 1 | seq |
| .....uguuucuuugacgucuggaccacgCgg.....                                                                            | 2    | 1 | seq |
| .....uguuucuuugacgucuggaccacgguU.....                                                                            | 1    | 1 | seq |
| .....uguuucuuugacgucuggaccacgguCg.....                                                                           | 3    | 1 | seq |
| .....uguuucuuugacgucuggaccacgguUg.....                                                                           | 4    | 1 | seq |
| .....uguuucuuugacgucuggaccacgguA.....                                                                            | 1    | 1 | seq |
| .....uguuucuuugacgucuggaccacgAagg.....                                                                           | 2    | 1 | seq |
| .....uguuucuuugacgucuggaccacgCgggu.....                                                                          | 1    | 1 | seq |
| .....uguuucuuugacgucuggaccacgguGgu.....                                                                          | 1    | 1 | seq |
| .....uguuucuuugacgucuggaccacgguGgu.....                                                                          | 1    | 1 | seq |
| .....guuucuuugacgucuggaU.....                                                                                    | 3    | 1 | seq |
| .....guuucuuugacgucuggGc.....                                                                                    | 10   | 1 | seq |
| .....guuucuCgacgucuggac.....                                                                                     | 1    | 1 | seq |

## Mature

## Star

agaggaagaggaagcgaaggguuuuugacgucuggccacgugguuuuacuuuagauuugcaguuauaacccaucaacuaccgcgguccagucgucaagaacaccuuu

|                          |     |   |     |
|--------------------------|-----|---|-----|
| .guucuuugacgucuggac      | 44  | 0 | seq |
| .guucuuugacgucuggacG     | 1   | 1 | seq |
| .guucuuugacgucuggacAc    | 1   | 1 | seq |
| .Auucuuugacgucuggacc     | 13  | 1 | seq |
| .gCucuugacgucuggacc      | 1   | 1 | seq |
| .guucuuugacgucuggacU     | 64  | 1 | seq |
| .guGcuugacgucuggacc      | 2   | 1 | seq |
| .guucCugacgucuggacc      | 1   | 1 | seq |
| .guucuuugacgucugCacc     | 2   | 1 | seq |
| .guucuuugacgucugUacc     | 1   | 1 | seq |
| .guucuuugacgucuggacc     | 422 | 0 | seq |
| .guucuCgacgucuggacc      | 1   | 1 | seq |
| .guucuuugacgucCggacc     | 1   | 1 | seq |
| .guucuuugGcgucuggacc     | 1   | 1 | seq |
| .guucuuugacgucuggacA     | 14  | 1 | seq |
| .guCcuugacgucuggacc      | 1   | 1 | seq |
| .guucuuugacgCcuugacc     | 2   | 1 | seq |
| .guucuuugacgucuggGcc     | 4   | 1 | seq |
| .guucuuugacgucAggacca    | 1   | 1 | seq |
| .guucuuugacgAcuggacca    | 1   | 1 | seq |
| .guucuuugacgucuggaccG    | 32  | 1 | seq |
| .guucuuugacgucAgaacca    | 1   | 1 | seq |
| .guucuuugacgucuggacca    | 607 | 0 | seq |
| .guucuuugacgucuggaccC    | 6   | 1 | seq |
| .guuUuugacgucuggacca     | 1   | 1 | seq |
| .guucuuugaUgucuggacca    | 1   | 1 | seq |
| .guucuuugacAucuggacca    | 2   | 1 | seq |
| .guucuuugacgucuggaccU    | 12  | 1 | seq |
| .gCucuugacgucuggacca     | 1   | 1 | seq |
| .Uuucuuugacgucuggacca    | 2   | 1 | seq |
| .Auucuuugacgucuggacca    | 8   | 1 | seq |
| .guucuuugacgucuggGcca    | 15  | 1 | seq |
| .guucuuugacgucugAacca    | 1   | 1 | seq |
| .guucuuugGcgucuggacca    | 1   | 1 | seq |
| .guCcuugacgucuggacca     | 2   | 1 | seq |
| .guucuCgacgucuggacca     | 4   | 1 | seq |
| .guucCugacgucuggacca     | 1   | 1 | seq |
| .guucuuugacgucCggacca    | 2   | 1 | seq |
| .guucuuugacgCcuugacca    | 2   | 1 | seq |
| .guucuuugacgGcuugacca    | 1   | 1 | seq |
| .guucuuugacgucuggacUa    | 1   | 1 | seq |
| .guucuuugacgucuggaccGc   | 1   | 1 | seq |
| .guucuuugacgucuggaUcac   | 1   | 1 | seq |
| .gCucuugacgucuggaccac    | 1   | 1 | seq |
| .guucuuugacgucuggaccac   | 101 | 0 | seq |
| .guucuuugacgucuggUccac   | 1   | 1 | seq |
| .guucuuugacgucuggaccaA   | 1   | 1 | seq |
| .guucuuugacgucuggaccaU   | 16  | 1 | seq |
| .guucuuugacgucAggaccac   | 1   | 1 | seq |
| .guucuuugacgucuggaccaG   | 1   | 1 | seq |
| .Auucuuugacgucuggaccac   | 14  | 1 | seq |
| .guucuuugGcgucuggaccacg  | 1   | 1 | seq |
| .guucuuugacgucAgaaccacg  | 1   | 1 | seq |
| .guucuuugacgCcuugaccacg  | 1   | 1 | seq |
| .Cuucuuugacgucuggaccacg  | 1   | 1 | seq |
| .guucuuugacgucuggaccacC  | 4   | 1 | seq |
| .guucuuugaUgucuggaccacg  | 1   | 1 | seq |
| .guucCugacgucuggaccacg   | 2   | 1 | seq |
| .guucuuugacgucuggaccacA  | 14  | 1 | seq |
| .guucuuugacgucuggaccacg  | 163 | 0 | seq |
| .guucuuugacgucuggaccGcg  | 2   | 1 | seq |
| .guCcuugacgucuggaccacg   | 1   | 1 | seq |
| .guucuuugacgucuggaccacU  | 2   | 1 | seq |
| .guucuuugacgucuggaccaUg  | 1   | 1 | seq |
| .Auucuuugacgucuggaccacg  | 190 | 1 | seq |
| .guucuuugacgucuggGccacg  | 8   | 1 | seq |
| .guucuuugacgAcuggaccacgu | 1   | 1 | seq |
| .guucuuugGcgucuggaccacgu | 2   | 1 | seq |
| .guucuuugacgucuggGccacgu | 4   | 1 | seq |
| .Auucuuugacgucuggaccacgu | 4   | 1 | seq |

## Mature

## Star

agaggaagaggaagcgaaggguuucuuuagacgucugggaccacgugguuuuacuuuaagauuugcaguuauaacccaucaacuacgcgguccagucgucaagaacaccuuu

|                                      |     |   |     |
|--------------------------------------|-----|---|-----|
| .....guucuuuagacgucugggaccacgC.....  | 7   | 1 | seq |
| .....guucuuuagacgucugggaccacgu.....  | 36  | 0 | seq |
| .....guucuuuagacgucugAaccacgu.....   | 1   | 1 | seq |
| .....guucuuuagacgCcuugaccacgu.....   | 1   | 1 | seq |
| .....guucuuuagacgucugggaccacguC..... | 1   | 1 | seq |
| .....uuuuuAacgucugggacc.....         | 1   | 1 | seq |
| .....uuuuuagacgucugggacc.....        | 1   | 1 | seq |
| .....uuuuuUacgucugggacc.....         | 1   | 1 | seq |
| .....uuuuuagacgucugggGcc.....        | 1   | 1 | seq |
| .....uuuuuagacgucugggacU.....        | 8   | 1 | seq |
| .....uuuuuagacgucugggacc.....        | 34  | 0 | seq |
| .....uuuuuagacgucugggaccU.....       | 1   | 1 | seq |
| .....uuuuuagacgucugggaccC.....       | 2   | 1 | seq |
| .....uuuuuagacgucugggGcca.....       | 6   | 1 | seq |
| .....uuuuuagacgucugggaccA.....       | 43  | 0 | seq |
| .....uuuuuagacgucugggaccG.....       | 1   | 1 | seq |
| .....uuuuuagacgucugggaccac.....      | 1   | 1 | seq |
| .....uuuuuagacgucugggaccac.....      | 36  | 0 | seq |
| .....uuuuuagacgCcuugaccac.....       | 1   | 1 | seq |
| .....uuuuuagacgucugggaccA.....       | 1   | 1 | seq |
| .....uuuuuagacgucugggaccA.....       | 1   | 1 | seq |
| .....uuuuuagacgucugggGccac.....      | 3   | 1 | seq |
| .....uuuuuagacgucugggaccacU.....     | 3   | 1 | seq |
| .....uuuuuagacgucugggaccacA.....     | 4   | 1 | seq |
| .....uuuuuagacgucugggaccGcg.....     | 1   | 1 | seq |
| .....uuuuuagCcgucugggaccacg.....     | 1   | 1 | seq |
| .....uuuuuagacgucugggaccacg.....     | 2   | 1 | seq |
| .....uuuuuagacgucugggGccacg.....     | 7   | 1 | seq |
| .....uuuuuagacgucugggaccacg.....     | 70  | 0 | seq |
| .....uuuuuagacgucugggaccacgG.....    | 8   | 1 | seq |
| .....uuuuuagacgucugggaccacUu.....    | 1   | 1 | seq |
| .....uuuuuagacgucugggaccacgu.....    | 7   | 0 | seq |
| .....uuuuuagacgucugggaccacgA.....    | 253 | 1 | seq |
| .....uuuuuagacgucugggaccacgug.....   | 3   | 0 | seq |
| .....uuuuuagacgucugggaccacguA.....   | 1   | 1 | seq |
| .....uuuuuagacgucugggGccacgug.....   | 1   | 1 | seq |
| .....uuuuuagacgucugggaccG.....       | 4   | 1 | seq |
| .....uuuuuagacgucugggaccA.....       | 50  | 0 | seq |
| .....uuuuuagacgCcuugaccA.....        | 1   | 1 | seq |
| .....uuuuuagacgucugggGcca.....       | 6   | 1 | seq |
| .....uuuuuagacgucugggaccA.....       | 1   | 1 | seq |
| .....uuuuuagacgucugggaccac.....      | 1   | 1 | seq |
| .....uuuuuagacgucugggGccac.....      | 3   | 1 | seq |
| .....uuuuuagacgucugggaccA.....       | 1   | 1 | seq |
| .....uuuuuagacgucugggaccA.....       | 1   | 1 | seq |
| .....uuuuuagacgucugggaccac.....      | 38  | 0 | seq |
| .....uuuuuagacgucugggaccacg.....     | 133 | 0 | seq |
| .....uuuuuagacAucugggaccacg.....     | 1   | 1 | seq |
| .....uuuuuagacgucugggacUacg.....     | 1   | 1 | seq |
| .....uuuuuagacgucugggaccacC.....     | 2   | 1 | seq |
| .....uuuuuagacgucugggaccGcg.....     | 1   | 1 | seq |
| .....uuuuuagacgucugggaccacA.....     | 13  | 1 | seq |
| .....uuuuuagacgucugggaccacU.....     | 3   | 1 | seq |
| .....uuuuuagacgucugggaccacg.....     | 2   | 1 | seq |
| .....uuuuuagGcgucugggaccacg.....     | 2   | 1 | seq |
| .....uuuuuagacgucugggGccacg.....     | 27  | 1 | seq |
| .....uuuuuagacgCcuugaccacg.....      | 2   | 1 | seq |
| .....uuuuuagacgGcuugaccacg.....      | 1   | 1 | seq |
| .....uuuuuagacgucugggaccacgu.....    | 2   | 0 | seq |
| .....uuuuuagacgucugggaccacgG.....    | 3   | 1 | seq |
| .....uuuuuagacgucugggaccacgA.....    | 63  | 1 | seq |
| .....uuuuuagacgucugggaccacgC.....    | 1   | 1 | seq |
| .....uuuuuagacgucugggaccacgAg.....   | 12  | 1 | seq |
| .....uuuuuagacgucugggaccGcgug.....   | 1   | 1 | seq |
| .....uuuuuagacgucugggaccacguUg.....  | 1   | 1 | seq |
| .....uuuuuagacgucugggaccacgugC.....  | 5   | 1 | seq |
| .....uuuuuagacgucugggaccacgAgg.....  | 3   | 1 | seq |
| .....uuuuuagacgucugggaccacgugU.....  | 7   | 1 | seq |
| .....uuuuuagGcgucugggaccac.....      | 1   | 1 | seq |
| .....uuuuuagacgucugggaccA.....       | 4   | 1 | seq |

## Mature

## Star

|                                                                                                                              |     |   |     |
|------------------------------------------------------------------------------------------------------------------------------|-----|---|-----|
| agaggaagaggaagcgaaggguuuc <u>uugacgucuggaccacg</u> guuuacuuuagauuugcaguaauaacccauca <u>cuaccg</u> cgguccagucgucaagaacacccuuu |     |   |     |
| .....cuugacgucuggaccac.....                                                                                                  | 24  | 0 | seq |
| .....cuugacgucuggaccacA.....                                                                                                 | 14  | 1 | seq |
| .....cuugacgucuggaccacUg.....                                                                                                | 1   | 1 | seq |
| .....cuugacgCcuugaccacg.....                                                                                                 | 1   | 1 | seq |
| .....cuugacgucuggaccacg.....                                                                                                 | 101 | 0 | seq |
| .....cuugacgucuggaccacC.....                                                                                                 | 1   | 1 | seq |
| .....cuugacgucUAgaccacg.....                                                                                                 | 1   | 1 | seq |
| .....cuugacgucuggacUacg.....                                                                                                 | 1   | 1 | seq |
| .....cuugacgucuggGccacg.....                                                                                                 | 26  | 1 | seq |
| .....cuugacgucuggaccacgu.....                                                                                                | 1   | 0 | seq |
| .....cuugacgucuggaccacgugUu.....                                                                                             | 6   | 1 | seq |
| .....uugCcgucuggaccacg.....                                                                                                  | 1   | 1 | seq |
| .....uugacgucuggGccacg.....                                                                                                  | 12  | 1 | seq |
| .....uugacgucuggaccacC.....                                                                                                  | 1   | 1 | seq |
| .....uugaUgucuggaccacg.....                                                                                                  | 1   | 1 | seq |
| .....uugacgucuggaccacU.....                                                                                                  | 2   | 1 | seq |
| .....uCgacgucuggaccacg.....                                                                                                  | 1   | 1 | seq |
| .....uugacgucuggaccacA.....                                                                                                  | 12  | 1 | seq |
| .....uugacgucuggaccacg.....                                                                                                  | 115 | 0 | seq |
| .....uugUcgucuggaccacg.....                                                                                                  | 2   | 1 | seq |
| .....uugacgucuggaccacgA.....                                                                                                 | 8   | 1 | seq |
| .....uugacgucuggaccacgC.....                                                                                                 | 1   | 1 | seq |
| .....uugacgucuggaccacgu.....                                                                                                 | 1   | 0 | seq |
| .....uugacgucuggaccacguU.....                                                                                                | 1   | 1 | seq |
| .....uugacgucuggaccacgugA.....                                                                                               | 1   | 1 | seq |
| .....uugacgucuggaccacgugC.....                                                                                               | 1   | 1 | seq |
| .....uugacgucuggaccacgugUuu.....                                                                                             | 1   | 1 | seq |
| .....ugacgucuggaccacgug.....                                                                                                 | 1   | 0 | seq |
| .....ugacgucuggaccacgAg.....                                                                                                 | 1   | 1 | seq |
| .....uAacgucuggaccacgugg.....                                                                                                | 1   | 1 | seq |
| .....caucaacuaUcgcggucca.....                                                                                                | 1   | 1 | seq |
| .....aucaacuaUcgcgguccagu.....                                                                                               | 1   | 1 | seq |
| .....ucaacuaUcgcgguccagu.....                                                                                                | 1   | 1 | seq |
| .....caacuaUcgcgguccagu.....                                                                                                 | 1   | 1 | seq |
| .....aacuaUcgcgguccagu.....                                                                                                  | 1   | 1 | seq |
| .....aacuaUcgcgguccaguc.....                                                                                                 | 1   | 1 | seq |
| .....aacuaUcgcgguccagucg.....                                                                                                | 1   | 1 | seq |
| .....acuaUcgcgguccagucguc.....                                                                                               | 1   | 1 | seq |
| .....acuaUcgcgguccagucguc.....                                                                                               | 2   | 1 | seq |
| .....uaUcgcgguccagucguc.....                                                                                                 | 2   | 1 | seq |
| .....uaUcgcgguccagucguc <u>caag</u> .....                                                                                    | 2   | 1 | seq |
| .....uaUcgcgguccagucguc <u>caagaac</u> .....                                                                                 | 2   | 1 | seq |
| .....aUcgcgguccagucguc <u>caaga</u> .....                                                                                    | 5   | 1 | seq |
| .....Ucgcgguccagucguc <u>caaga</u> .....                                                                                     | 1   | 1 | seq |
| .....Ucgcgguccagucguc <u>caagaa</u> .....                                                                                    | 1   | 1 | seq |
| .....Ucgcgguccagucguc <u>caagaac</u> .....                                                                                   | 1   | 1 | seq |
| .....cgcgguccagucgucUagaa.....                                                                                               | 1   | 1 | seq |
| .....cgcgguccagucgucUagaa <u>c</u> .....                                                                                     | 14  | 1 | seq |
| .....cgcgguccagucguc <u>caagaacacU</u> .....                                                                                 | 1   | 1 | seq |
| .....cgcgguccagucguc <u>caagaacacA</u> .....                                                                                 | 1   | 1 | seq |
| .....cgcgguccagucgucUagaa <u>acac</u> .....                                                                                  | 4   | 1 | seq |
| .....cgcgguccagucguc <u>caagaacac</u> .....                                                                                  | 1   | 0 | seq |
| .....gcggguccagucgucUaga.....                                                                                                | 1   | 1 | seq |
| .....gcggguccagucguc <u>caagaac</u> .....                                                                                    | 1   | 0 | seq |
| .....gcggguccagucgucUaga <u>c</u> .....                                                                                      | 6   | 1 | seq |
| .....gcggguccagucgucUaga <u>aca</u> .....                                                                                    | 14  | 1 | seq |
| .....gcggguccagucguc <u>caagaaca</u> .....                                                                                   | 5   | 0 | seq |
| .....gcggguccagucgucUaga <u>acac</u> .....                                                                                   | 1   | 1 | seq |
| .....gcggguccagucgucUaga <u>acacac</u> .....                                                                                 | 23  | 1 | seq |
| .....gcggguccagucguc <u>caagaacac</u> .....                                                                                  | 4   | 0 | seq |
| .....gcggguccagucgucUaga <u>acac</u> .....                                                                                   | 1   | 1 | seq |
| .....cgguccagucguc <u>caaga</u> .....                                                                                        | 2   | 0 | seq |
| .....cgguccagucgucUaga.....                                                                                                  | 20  | 1 | seq |
| .....cgguccagucguc <u>caagaa</u> .....                                                                                       | 1   | 0 | seq |
| .....cgguccagucgucUaga.....                                                                                                  | 10  | 1 | seq |
| .....cgguccagCcguc <u>caagaac</u> .....                                                                                      | 1   | 1 | seq |
| .....cgguccagucguc <u>caagaGc</u> .....                                                                                      | 1   | 1 | seq |
| .....cgguccagucguc <u>caagaac</u> .....                                                                                      | 16  | 0 | seq |
| .....cgguccagucgucUaga <u>ac</u> .....                                                                                       | 76  | 1 | seq |

## Mature

## Star

agaggaagaggaagcgaaggguuucuugacgucuggaccacgugguuuacuuuaagauuugcaguaauaacccaucaacuaccg

|                                     |       |   |     |
|-------------------------------------|-------|---|-----|
| .....cgguccagucgucagaU.....         | 2     | 1 | seq |
| .....cgguccagucgCcaagaac.....       | 1     | 1 | seq |
| .....cgguccagucgucaaAaaca.....      | 1     | 1 | seq |
| .....cgguccagucgucUagaaca.....      | 97    | 1 | seq |
| .....cgguccagucgucagaacU.....       | 1     | 1 | seq |
| .....cgguccagucgucagaacG.....       | 2     | 1 | seq |
| .....cgguccagucgucagaaca.....       | 36    | 0 | seq |
| .....cgguccagucgucagaacaU.....      | 9     | 1 | seq |
| .....cgguccCgucgucagaacac.....      | 1     | 1 | seq |
| .....Agguccagucgucagaacac.....      | 1     | 1 | seq |
| .....cgguccagucgucagaacaA.....      | 2     | 1 | seq |
| .....cggCccagucgucagaacac.....      | 2     | 1 | seq |
| .....cgguccagucgucagaacac.....      | 130   | 0 | seq |
| .....cgguccagucgucagUacac.....      | 1     | 1 | seq |
| .....cgguccagucgucagaacac.....      | 2     | 1 | seq |
| .....cgguccagucgucagaacCc.....      | 1     | 1 | seq |
| .....cgguccagucgucUagaacac.....     | 510   | 1 | seq |
| .....cgguccagucgucagaacacA.....     | 14    | 1 | seq |
| .....cggCccagucgucagaacaccc.....    | 5     | 1 | seq |
| .....cgAuccagucgucagaacaccc.....    | 1     | 1 | seq |
| .....cgguccagucgucGgaacaccc.....    | 4     | 1 | seq |
| .....cggGccagucgucagaacaccc.....    | 1     | 1 | seq |
| .....cgguccagucgCcaagaacaccc.....   | 2     | 1 | seq |
| .....cgguccGgucgucagaacaccc.....    | 3     | 1 | seq |
| .....cgguccagucgucagaacaccc.....    | 1     | 1 | seq |
| .....cgguccagucgucGagaacaccc.....   | 5     | 1 | seq |
| .....cgguccagucgucUagaacaccc.....   | 22203 | 1 | seq |
| .....cgguccagucgucagGacaccc.....    | 2     | 1 | seq |
| .....cgguccagucgucagaacGcc.....     | 1     | 1 | seq |
| .....cgguccUgucgucagaacaccc.....    | 1     | 1 | seq |
| .....cgguccagucgucUaacaaccc.....    | 1     | 1 | seq |
| .....cgguccagucgucagaacaU.....      | 67    | 1 | seq |
| .....cgguccagucgucagaacaUc.....     | 4     | 1 | seq |
| .....cgguccagucgucagaGcacc.....     | 2     | 1 | seq |
| .....cgguccagucgucagaacUcc.....     | 1     | 1 | seq |
| .....cgguccagucgucCagaacaccc.....   | 47    | 1 | seq |
| .....Agguccagucgucagaacaccc.....    | 2     | 1 | seq |
| .....cgguccagucgucagaacaccc.....    | 571   | 0 | seq |
| .....cgguccagucgucagaacacccu.....   | 8     | 0 | seq |
| .....cgguccagucgucagaacacccG.....   | 1     | 1 | seq |
| .....cgguccagucgucagaacacccC.....   | 1     | 1 | seq |
| .....cgguccagucgucUagaacacccu.....  | 114   | 1 | seq |
| .....cgguccagucgucagaacacccuuG..... | 1     | 1 | seq |
| .....gguccagucgucUagaa.....         | 1     | 1 | seq |
| .....gguccagucgucagaac.....         | 4     | 0 | seq |
| .....gguccagucgucUagaac.....        | 89    | 1 | seq |
| .....gguccagucgucUagaaca.....       | 246   | 1 | seq |
| .....gguccagucgucagaaca.....        | 1     | 0 | seq |
| .....gguccagucgucUagaacac.....      | 97    | 1 | seq |
| .....gguccagucgucagaacac.....       | 2     | 0 | seq |
| .....gguccagucgucCagaacaccc.....    | 1     | 1 | seq |
| .....gguccagucgucagaacaccc.....     | 2     | 0 | seq |
| .....gguccagucgucUagaacaccc.....    | 109   | 1 | seq |
| .....guccagucgucUagaac.....         | 41    | 1 | seq |
| .....guccagucgucUagaaca.....        | 73    | 1 | seq |
| .....guccagucgucagaacU.....         | 1     | 1 | seq |
| .....guccagucgucUagaacac.....       | 17    | 1 | seq |
| .....guccagucgucagaacaccc.....      | 12    | 0 | seq |
| .....guccagucgucagaacacU.....       | 2     | 1 | seq |
| .....guccagucgucUagaacaccc.....     | 7     | 1 | seq |
| .....guccagucgucUagaacacccu.....    | 5     | 1 | seq |
| .....uccagucgucagaacC.....          | 1     | 1 | seq |
| .....uccagucgucUagaaca.....         | 7     | 1 | seq |
| .....uccagucgucagaaca.....          | 1     | 0 | seq |
| .....Gccagucgucagaaca.....          | 1     | 1 | seq |
| .....uccagucgucUagaacac.....        | 6     | 1 | seq |
| .....uccagucgucagaacac.....         | 2     | 0 | seq |
| .....uccagucgucUagaacaccc.....      | 36    | 1 | seq |
| .....uccagucgucagaacacU.....        | 1     | 1 | seq |
| .....uccagucgucagaacaccc.....       | 4     | 0 | seq |

## Mature

## Star

|                                                                                       |               |              |   |     |  |
|---------------------------------------------------------------------------------------|---------------|--------------|---|-----|--|
| agaggaagaggaagcgaagguguuucuugacgucuggaccacgugguuuacuuuaagauuugcaguaauaacccaucaacuaccg | cgguccagucguc | caagaacacuuu |   |     |  |
| .....uccagucguc                                                                       | caagaacaccu.. | 1            | 0 | seq |  |
| .....uccagucguc                                                                       | Uagaacaccu..  | 178          | 1 | seq |  |
| .....uccagucguc                                                                       | caagaacacuu.  | 8            | 0 | seq |  |
| .....uccagucguc                                                                       | Uagaacacuu.   | 77           | 1 | seq |  |
| .....uccagucguc                                                                       | Uagaacacuuu   | 7            | 1 | seq |  |
| .....ccagucguc                                                                        | Uagaacac...   | 4            | 1 | seq |  |
| .....ccagucguc                                                                        | Uagaacacc...  | 11           | 1 | seq |  |
| .....cagucguc                                                                         | Uagaacacc...  | 21           | 1 | seq |  |
| .....cagucguc                                                                         | Uagaacaccu..  | 1            | 1 | seq |  |





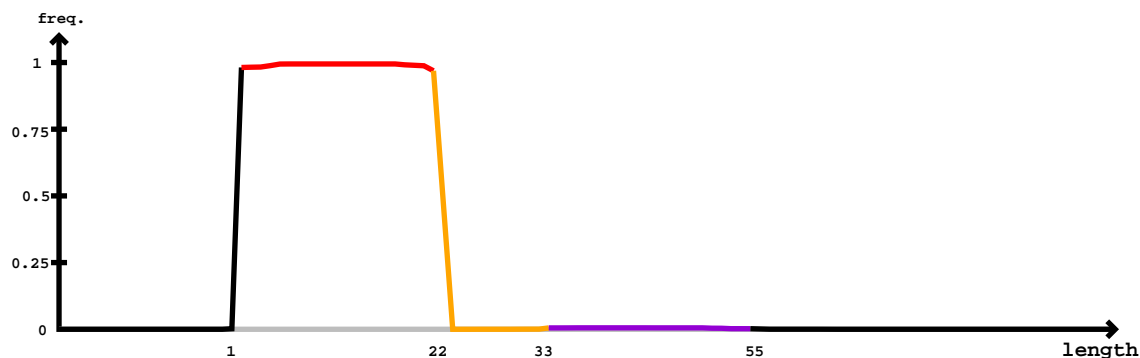

Star

[illegible]

## Mature

## Star

|                                                                                                                                                        |    |   |     |
|--------------------------------------------------------------------------------------------------------------------------------------------------------|----|---|-----|
| ggcuuggguaggauuaggcgcacugggcauaacucugacc <u>cauaguuuau</u> gggucagaguuuu <u>ugccaguu</u> ccgccc <u>cauucc</u> auuugugccuuu <u>aagua</u> auuucagaaaugga |    |   |     |
| .....acuggcauaacucugacca.....                                                                                                                          | 7  | 0 | seq |
| .....acuggcauaacucugaccG.....                                                                                                                          | 57 | 1 | seq |
| .....cuggcauaacucugaca.....                                                                                                                            | 2  | 1 | seq |
| .....cuggcauaacucugacc.....                                                                                                                            | 80 | 0 | seq |
| .....cuggcauaacucugacU.....                                                                                                                            | 13 | 1 | seq |
| .....cuggcauaacucugaccG.....                                                                                                                           | 74 | 1 | seq |
| .....cuggcauaacucugaccU.....                                                                                                                           | 2  | 1 | seq |
| .....cuggcauaacucugacca.....                                                                                                                           | 10 | 0 | seq |
| .....uggcauaacucugaccG.....                                                                                                                            | 7  | 1 | seq |
| .....uaUuuuauuggucagaguu.....                                                                                                                          | 1  | 1 | seq |
| .....uuuauuggucagaguuuug.....                                                                                                                          | 3  | 0 | seq |
| .....uggucagaguuuugccGguuc.....                                                                                                                        | 1  | 1 | seq |
| .....uggucagaguuuugccGguucc.....                                                                                                                       | 3  | 1 | seq |
| .....ggucagaguuuugccGguucc.....                                                                                                                        | 5  | 1 | seq |
| .....gucagaguuuugccGgu.....                                                                                                                            | 1  | 1 | seq |
| .....gucagaguuuugccGguucc.....                                                                                                                         | 1  | 1 | seq |
| .....ucagaguuuugccGgu.....                                                                                                                             | 38 | 1 | seq |
| .....ucagaguuuugccaguu.....                                                                                                                            | 1  | 0 | seq |
| .....ucagaguuuugccGguuc.....                                                                                                                           | 5  | 1 | seq |
| .....ucagaguuuugccGguucc.....                                                                                                                          | 36 | 1 | seq |
| .....ucagaguuuugccGguuccgc.....                                                                                                                        | 1  | 1 | seq |
| .....ucagaguuuugccaguuccgU.....                                                                                                                        | 1  | 1 | seq |
| .....ucagaguuuugccaguuccgcc.....                                                                                                                       | 25 | 0 | seq |
| .....ucagaguuuugccaguuccgcU.....                                                                                                                       | 8  | 1 | seq |
| .....ucagaguuuugccaguuccgcA.....                                                                                                                       | 3  | 1 | seq |
| .....ucagaguuuugccaUuuccgcc.....                                                                                                                       | 1  | 1 | seq |
| .....ucagaguuuugccagGuccgcc.....                                                                                                                       | 1  | 1 | seq |
| .....ucagaguuuugccaguuccAcc.....                                                                                                                       | 7  | 1 | seq |
| .....ucagaguuuugccGguuccgcc.....                                                                                                                       | 10 | 1 | seq |
| .....cagaguuuugccGguucc.....                                                                                                                           | 1  | 1 | seq |
| .....agaguuuugccGguucc.....                                                                                                                            | 2  | 1 | seq |
| .....agaguuuugccGguuccgcc.....                                                                                                                         | 1  | 1 | seq |
| .....gaguuuugccaguuccgc.....                                                                                                                           | 1  | 0 | seq |
| .....gaguuuugccaguuccgcc.....                                                                                                                          | 1  | 0 | seq |
| .....gaguuuugccaguuccgcccauuccC.....                                                                                                                   | 2  | 1 | seq |
| .....gaguuuugccaguuccgcccauuccua.....                                                                                                                  | 2  | 0 | seq |
| .....gaguuuugccaguuccgcccaCuccuau.....                                                                                                                 | 1  | 1 | seq |

[illegible]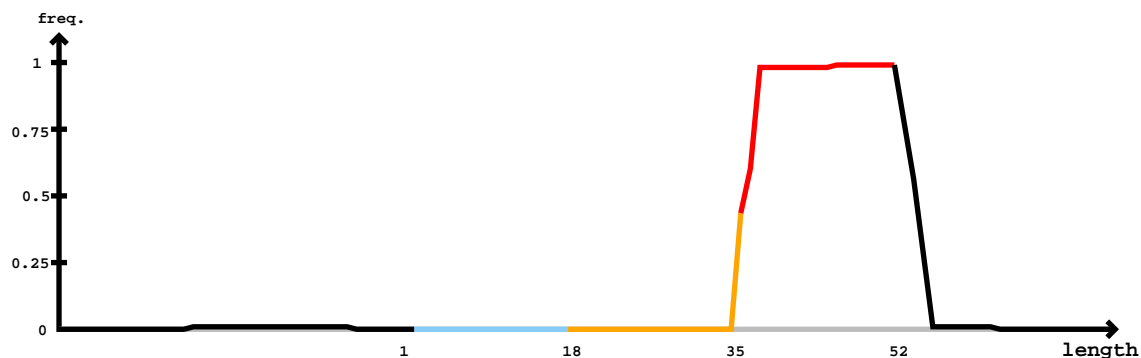

## Mature

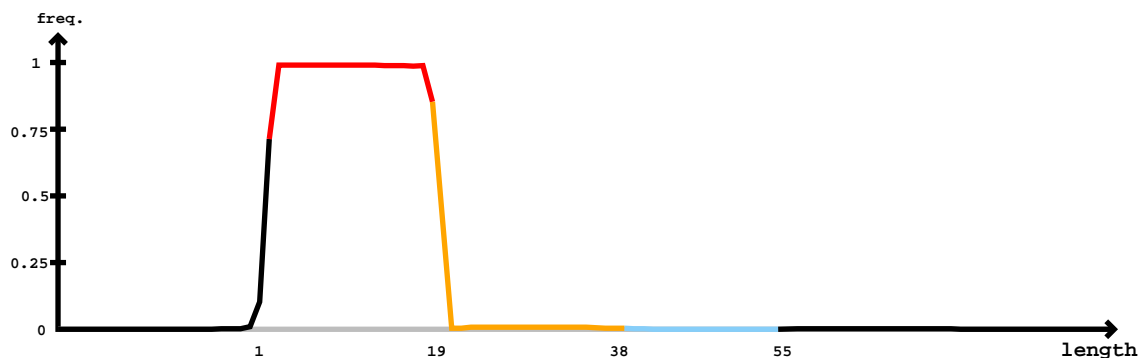

Star

| 5'-                                                                                  |       | -3' | exp    |  |
|--------------------------------------------------------------------------------------|-------|-----|--------|--|
| .(((.....((((((.....(((.(((((.(((.....)))..))))).)))).)..))))).(((.....)))....)).... | reads | mm  | sample |  |
| .....auUgggcucucuugaaa.....                                                          | 1     | 1   | seq    |  |
| .....Agcucucauugaaagca.....                                                          | 1     | 1   | seq    |  |
| .....Agcucucauugaaagcacca.....                                                       | 2     | 1   | seq    |  |
| .....gAcucucauugaaagcacca.....                                                       | 1     | 1   | seq    |  |
| .....Ccucucauugaaagcacc.....                                                         | 1     | 1   | seq    |  |
| .....gcucucauugaaagcacc.....                                                         | 4     | 0   | seq    |  |
| .....Acucucauugaaagcacc.....                                                         | 3     | 1   | seq    |  |
| .....gcucucaUGaaagcacca.....                                                         | 1     | 1   | seq    |  |
| .....Acucucauugaaagcacca.....                                                        | 10    | 1   | seq    |  |
| .....gcucucaCugaaagcacca.....                                                        | 1     | 1   | seq    |  |
| .....Ccucucauugaaagcacca.....                                                        | 2     | 1   | seq    |  |
| .....gcucucauugaaaUcacca.....                                                        | 1     | 1   | seq    |  |
| .....gAcucucauugaaagcacca.....                                                       | 2     | 1   | seq    |  |
| .....Ncucucauugaaagcacca.....                                                        | 1     | 1   | seq    |  |
| .....gcucucauugaaagcacca.....                                                        | 20    | 0   | seq    |  |
| .....gcucucaGugaaagcacca.....                                                        | 1     | 1   | seq    |  |
| .....gcucucauuAaaagcacca.....                                                        | 1     | 1   | seq    |  |
| .....cucucauugaaagcacU.....                                                          | 7     | 1   | seq    |  |
| .....cucucaGugaaagcacc.....                                                          | 4     | 1   | seq    |  |
| .....cucucauugUaagcacc.....                                                          | 1     | 1   | seq    |  |
| .....cucucauuCaaagcacc.....                                                          | 1     | 1   | seq    |  |
| .....cucucauuUaaagcacc.....                                                          | 1     | 1   | seq    |  |
| .....cucucauuAaaagcacc.....                                                          | 5     | 1   | seq    |  |
| .....cucucauugaaagcacc.....                                                          | 44    | 0   | seq    |  |
| .....cucucauugGaagcacca.....                                                         | 2     | 1   | seq    |  |
| .....cucucauCgaagcacca.....                                                          | 1     | 1   | seq    |  |
| .....cucucauugaaagcacU.....                                                          | 3     | 1   | seq    |  |
| .....cucucauuAaaagcacca.....                                                         | 16    | 1   | seq    |  |
| .....cucucaCugaaagcacca.....                                                         | 2     | 1   | seq    |  |
| .....cucucGuugaaagcacca.....                                                         | 1     | 1   | seq    |  |
| .....Uucucauugaaagcacca.....                                                         | 2     | 1   | seq    |  |
| .....cucucauugaaagcaccG.....                                                         | 6     | 1   | seq    |  |
| .....cucucaGugaaagcacca.....                                                         | 5     | 1   | seq    |  |
| .....cucucauugaaagcaccC.....                                                         | 2     | 1   | seq    |  |

# Mature

# Star

|                                                                                                          |     |   |     |
|----------------------------------------------------------------------------------------------------------|-----|---|-----|
| ugggcucccguaacaaugggcucucauugaagcaccaucccucuaccagggaagguguuccucaccaagcccaucuugucucugaaaagacaugcuugccccgu |     |   |     |
| .....cucucauuUaaagcacca.....                                                                             | 2   | 1 | seq |
| .....cucucauugaagcacca.....                                                                              | 206 | 0 | seq |
| .....cucucauugaagcGcca.....                                                                              | 3   | 1 | seq |
| .....cucucauugaagcaccac.....                                                                             | 1   | 0 | seq |
| .....ucucauugaagcaccC.....                                                                               | 1   | 1 | seq |
| .....ucCcauugaagcacca.....                                                                               | 1   | 1 | seq |
| .....ucucauugaagcaccG.....                                                                               | 6   | 1 | seq |
| .....ucucaCugaaagcacca.....                                                                              | 1   | 1 | seq |
| .....ucucauugaagcaccU.....                                                                               | 2   | 1 | seq |
| .....ucucauuAaaagcacca.....                                                                              | 8   | 1 | seq |
| .....ucucauugaagcGcacca.....                                                                             | 1   | 1 | seq |
| .....ucucaGugaaagcacca.....                                                                              | 3   | 1 | seq |
| .....ucucauuCaaagcacca.....                                                                              | 1   | 1 | seq |
| .....Ccucauugaagcacca.....                                                                               | 2   | 1 | seq |
| .....ucucauugaagcacca.....                                                                               | 117 | 0 | seq |
| .....cacucccucuuaGcaagga.....                                                                            | 1   | 1 | seq |
| .....acucccucuuaGagg.....                                                                                | 1   | 1 | seq |
| .....ccucuuaGaggagg.....                                                                                 | 1   | 1 | seq |
| .....ccucuuaGaggaggug.....                                                                               | 1   | 1 | seq |
| .....aucuugucucugaaa.....                                                                                | 1   | 0 | seq |

5' UUC CAC AGC UUU CUC GAA CUC UUA C-G UGU GAG CAG CAG A G C A G A U C  
3' A A G G G U G U C A A A G A A C U U G A A A U U A U A C C U U G A U G

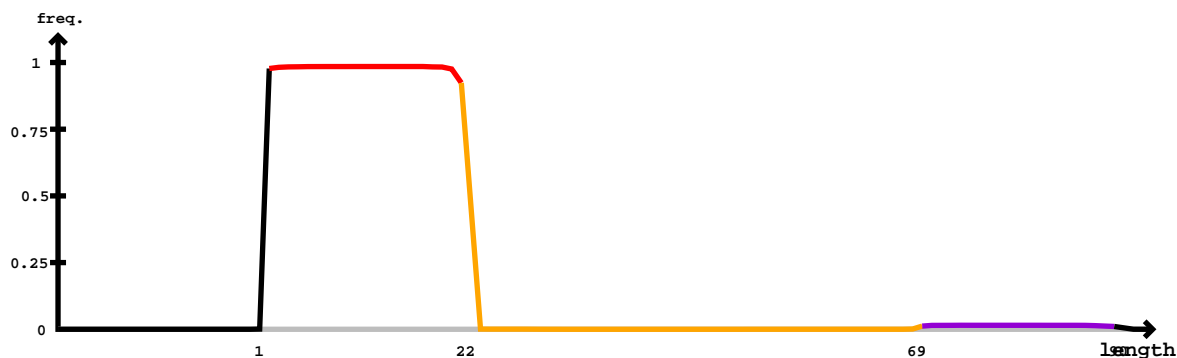

Star

[illegible]

## Mature

## Star

ugacgaaucugucauaacuuuuccacagcuuucuuugaacuuuacguguacgggacgaggagauucugauuucuaacgucugcgauuaaaguucaagaaaacugugggaaagca

|                                   |       |   |     |
|-----------------------------------|-------|---|-----|
| .....uuccGcagcuuucuuugaacu.....   | 3     | 1 | seq |
| .....uuccacagcuuucuuugaacC.....   | 153   | 1 | seq |
| .....uuccacagcuuucuuugaacu.....   | 848   | 0 | seq |
| .....uGccacagcuuucuuugaacu.....   | 1     | 1 | seq |
| .....uuccacagcuuucuuAgaacuu.....  | 8     | 1 | seq |
| .....uuccUcagcuuucuuugaacu.....   | 12    | 1 | seq |
| .....uuccacagcuuucGugaacuu.....   | 2     | 1 | seq |
| .....uuccacagcCuucuuugaacuu.....  | 59    | 1 | seq |
| .....uuccacagcuuucAugaacuu.....   | 10    | 1 | seq |
| .....uuccacagcuCucuugaacuu.....   | 30    | 1 | seq |
| .....uuccacagcuuuUuugaacuu.....   | 5     | 1 | seq |
| .....uuccacagcuuucUGaacu.....     | 8     | 1 | seq |
| .....uuccaGagcuuucuuugaacu.....   | 2     | 1 | seq |
| .....uuAcacagcuuucuuugaacu.....   | 5     | 1 | seq |
| .....uuccacagcuuucuuugaacuN.....  | 1     | 1 | seq |
| .....uucUacagcuuucuuugaacu.....   | 14    | 1 | seq |
| .....uuccGcagcuuucuuugaacu.....   | 53    | 1 | seq |
| .....uucGacagcuuucuuugaacu.....   | 1     | 1 | seq |
| .....uuccacagcuuAcuugaacu.....    | 1     | 1 | seq |
| .....uuccacaAcuuucuuugaacu.....   | 8     | 1 | seq |
| .....Guccacagcuuucuuugaacu.....   | 22    | 1 | seq |
| .....uuccacaUcuuucuuugaacu.....   | 1     | 1 | seq |
| .....uuccacagUuuucuuugaacu.....   | 11    | 1 | seq |
| .....uAccacagcuuucuuugaacu.....   | 10    | 1 | seq |
| .....Auccacagcuuucuuugaacu.....   | 12    | 1 | seq |
| .....uuccacCGcuuucuuugaacu.....   | 3     | 1 | seq |
| .....uuccacagcuuucuuugaacCu.....  | 55    | 1 | seq |
| .....uuccacUgcuuucuuugaacu.....   | 9     | 1 | seq |
| .....uuccacagcuuuGuugaacu.....    | 4     | 1 | seq |
| .....uuccacagcuuucuuugaacu.....   | 16608 | 0 | seq |
| .....uuccacagcuuucuuGcacuu.....   | 5     | 1 | seq |
| .....uuccacagcuuucuuugaaGuu.....  | 3     | 1 | seq |
| .....uuccacagcuuAucuugaacu.....   | 5     | 1 | seq |
| .....uuccacagAuucuuugaacu.....    | 1     | 1 | seq |
| .....uuccacagcuuucuuugaCcuu.....  | 1     | 1 | seq |
| .....uuccaUagcuuucuuugaacu.....   | 13    | 1 | seq |
| .....uuccacagcuuucuuugaaAu.....   | 2     | 1 | seq |
| .....uuccacagcuuucuuCgaacu.....   | 51    | 1 | seq |
| .....uuccacagcuuucuuugaaUuu.....  | 12    | 1 | seq |
| .....uuccacagcAuucuuugaacu.....   | 3     | 1 | seq |
| .....uCccacagcuuucuuugaacu.....   | 46    | 1 | seq |
| .....uuccacagcuuucuuUGacu.....    | 9     | 1 | seq |
| .....uuccacagcuuucCugaacu.....    | 41    | 1 | seq |
| .....uuccacagcuuucuuugaacuC.....  | 2434  | 1 | seq |
| .....uuccacagcuuucuuugaacAu.....  | 12    | 1 | seq |
| .....uuccacagGuuucuuugaacu.....   | 3     | 1 | seq |
| .....uuGcacagcuuucuuugaacu.....   | 6     | 1 | seq |
| .....uuccacagcuuucuuugaacu.....   | 25    | 1 | seq |
| .....uuccCagcuuucuuugaacu.....    | 3     | 1 | seq |
| .....uuccacagcuGucuugaacu.....    | 8     | 1 | seq |
| .....uuccacagcuuucuuugaacuG.....  | 271   | 1 | seq |
| .....uuccacagcuuucuuUGacu.....    | 58    | 1 | seq |
| .....uuccacagcuuCuugaacu.....     | 43    | 1 | seq |
| .....uuccacagcuuucuuugaacGu.....  | 28    | 1 | seq |
| .....uuUcacagcuuucuuugaacu.....   | 13    | 1 | seq |
| .....uucAacagcuuucuuugaacu.....   | 1     | 1 | seq |
| .....uuccacagcuuucuuAaacuu.....   | 3     | 1 | seq |
| .....uuccacagcuuucuuugaGcuu.....  | 61    | 1 | seq |
| .....Cuccacagcuuucuuugaacu.....   | 64    | 1 | seq |
| .....uuccacagcGuucuuugaacu.....   | 2     | 1 | seq |
| .....uuccacagcuuucuuugaacuuc..... | 31    | 1 | seq |
| .....uuccacagcuuucuuCgaacu.....   | 1     | 1 | seq |
| .....uuccGcagcuuucuuugaacuuu..... | 1     | 1 | seq |
| .....uuccacagcuuucuuugaGcuuu..... | 1     | 1 | seq |
| .....uuccacagcuCucuugaacuuu.....  | 1     | 1 | seq |
| .....uuccacagcuuucuuugaacuuu..... | 167   | 0 | seq |
| .....Cuccacagcuuucuuugaacuuu..... | 1     | 1 | seq |
| .....uuccacagcuuucuuugaacuAu..... | 2     | 1 | seq |
| .....uCccacagcuuucuuugaacuuu..... | 1     | 1 | seq |
| .....uuccacGgcuuucuuugaacuuu..... | 1     | 1 | seq |

## Mature

## Star

|                                                                                                                                   |     |   |     |
|-----------------------------------------------------------------------------------------------------------------------------------|-----|---|-----|
| ugacgaaucugucauacuu <u>uuccacagcuuuucugaacuuu</u> acgugucgaggacgaggagauucugauuuucacgucugcgauu <u>aaaguucaagaaaa</u> cugugggaaagca |     |   |     |
| .....uuccacagcuuuucugaacuuGa.....                                                                                                 | 1   | 1 | seq |
| .....uuccacagcuuuucugaacuuuU.....                                                                                                 | 1   | 1 | seq |
| .....uuccacagcuuuucugaacuuCac.....                                                                                                | 1   | 1 | seq |
| .....uccacagcuuuucugaac.....                                                                                                      | 7   | 0 | seq |
| .....uccacUgcuuucugaacu.....                                                                                                      | 1   | 1 | seq |
| .....uccacagcuuuucugaacu.....                                                                                                     | 20  | 0 | seq |
| .....uccacagcuuuucugaacC.....                                                                                                     | 7   | 1 | seq |
| .....Cccacagcuuuucugaacuu.....                                                                                                    | 1   | 1 | seq |
| .....uUccacagcuuuucugaacuu.....                                                                                                   | 2   | 1 | seq |
| .....uccacagcuuuucugUacu.....                                                                                                     | 1   | 1 | seq |
| .....uccacagcuuuucugaacuu.....                                                                                                    | 29  | 0 | seq |
| .....uccacagcuuuucugaacuC.....                                                                                                    | 1   | 1 | seq |
| .....uccacagcuuuucugaacuC.....                                                                                                    | 4   | 1 | seq |
| .....uccacagcuuuucugaacuuu.....                                                                                                   | 23  | 0 | seq |
| .....uccacagcuuuucugaacuuu.....                                                                                                   | 2   | 0 | seq |
| .....ccacagcuuuucugaac.....                                                                                                       | 8   | 0 | seq |
| .....ccacagcuuuucugaaU.....                                                                                                       | 2   | 1 | seq |
| .....ccacagcuuuucugaaA.....                                                                                                       | 1   | 1 | seq |
| .....ccacagcuuuucugaacC.....                                                                                                      | 1   | 1 | seq |
| .....ccacagcuuuucugaacG.....                                                                                                      | 1   | 1 | seq |
| .....ccacagcuuuucugaacu.....                                                                                                      | 18  | 0 | seq |
| .....ccacagcuuuucugaacuC.....                                                                                                     | 1   | 1 | seq |
| .....ccacagcuuuucugaacu.....                                                                                                      | 5   | 0 | seq |
| .....cacagcuuuucugaacC.....                                                                                                       | 1   | 1 | seq |
| .....cacagcuuuucugaacu.....                                                                                                       | 1   | 0 | seq |
| .....cacagcuuuucugaacu.....                                                                                                       | 4   | 0 | seq |
| .....cacagcuuuucugaacuC.....                                                                                                      | 1   | 1 | seq |
| .....cacagcuuuucugaacuuuacguguc.....                                                                                              | 1   | 0 | seq |
| .....cacagcuuuucugaacuuuacgugacgg.....                                                                                            | 1   | 0 | seq |
| .....acagcuuuucugaacuu.....                                                                                                       | 10  | 0 | seq |
| .....acagcuuuucugaacuC.....                                                                                                       | 2   | 1 | seq |
| .....acagcuCucuugaacu.....                                                                                                        | 1   | 1 | seq |
| .....acagcuuuucugaacuuuacgug.....                                                                                                 | 1   | 0 | seq |
| .....cagcuuuucugaacuuu.....                                                                                                       | 1   | 0 | seq |
| .....cagcuuuucugaacuuuacgugu.....                                                                                                 | 1   | 0 | seq |
| .....cagcuuuucugaacuuuacgugacg.....                                                                                               | 1   | 0 | seq |
| .....agcuuuucugaacuuuacgugu.....                                                                                                  | 1   | 0 | seq |
| .....uuucugaacuuuacgugu.....                                                                                                      | 2   | 0 | seq |
| .....uuucugaacuuuacgugGa.....                                                                                                     | 1   | 1 | seq |
| .....ucugaacuuuacgugu.....                                                                                                        | 1   | 0 | seq |
| .....gauuuucacgucugUgauuuuaguucaag.....                                                                                           | 1   | 1 | seq |
| .....ucuacgucugUgauuuuaguuca.....                                                                                                 | 1   | 1 | seq |
| .....ugUgauuuuaguucaagaaaacu.....                                                                                                 | 1   | 1 | seq |
| .....aguucaagaaaaacuguggg.....                                                                                                    | 1   | 0 | seq |
| .....aguucaagaaaaacuguggga.....                                                                                                   | 4   | 0 | seq |
| .....aguucaagaaaaacugugggaa.....                                                                                                  | 3   | 0 | seq |
| .....aguucaagaaaaacugugggaaa.....                                                                                                 | 8   | 0 | seq |
| .....aguucaagaaaGacugugggaaa.....                                                                                                 | 1   | 1 | seq |
| .....guucaagaaaaacuguggg.....                                                                                                     | 4   | 0 | seq |
| .....guucaUgaaaaacuguggg.....                                                                                                     | 1   | 1 | seq |
| .....Nuucaagaaaaacuguggg.....                                                                                                     | 1   | 1 | seq |
| .....guucaagaaaaacuguggg.....                                                                                                     | 13  | 0 | seq |
| .....guucaagaaaaacuguggGA.....                                                                                                    | 2   | 1 | seq |
| .....guucaagaaaaacugugggG.....                                                                                                    | 3   | 1 | seq |
| .....guucaagaaaaacuguggga.....                                                                                                    | 23  | 0 | seq |
| .....guucaagaaaaacugugggGa.....                                                                                                   | 1   | 1 | seq |
| .....guucaagaaaaacugugggaG.....                                                                                                   | 1   | 1 | seq |
| .....guucaagaaaaacugugggaa.....                                                                                                   | 20  | 0 | seq |
| .....guucaagaaaacCgugggaa.....                                                                                                    | 1   | 1 | seq |
| .....guucaagaaaaacugugggaU.....                                                                                                   | 1   | 1 | seq |
| .....guuUaagaaaaacugugggaaa.....                                                                                                  | 1   | 1 | seq |
| .....guucaagaaaaacugugggaGa.....                                                                                                  | 1   | 1 | seq |
| .....Auucaagaaaaacugugggaaa.....                                                                                                  | 1   | 1 | seq |
| .....guucGagaaaaacugugggaaa.....                                                                                                  | 1   | 1 | seq |
| .....guucaagaaaGcugugggaaa.....                                                                                                   | 1   | 1 | seq |
| .....guucaGgaaaaacugugggaaa.....                                                                                                  | 3   | 1 | seq |
| .....guucaagaaaaacugugggaaG.....                                                                                                  | 1   | 1 | seq |
| .....guucaagaaaaacugAgggaaa.....                                                                                                  | 1   | 1 | seq |
| .....guucaagaaaaacugugggaaa.....                                                                                                  | 162 | 0 | seq |
| .....guucaagaaaaacugugggaaaC.....                                                                                                 | 1   | 1 | seq |



## Mature

## Star

|                                                                                                                    |    |   |     |
|--------------------------------------------------------------------------------------------------------------------|----|---|-----|
| ugacgaaucugucauacuuuuccacagcuuucugaacuuuacguguaacgggacgaggagauucugauuuucuaacgucugcgaauaaaguucaagaaaaacugugggaaagca |    |   |     |
| .....guucaagaaaaacugugggaaaA..                                                                                     | 1  | 1 | seq |
| .....uucaagaaaaacuguggg.....                                                                                       | 5  | 0 | seq |
| .....uucagaaaGcuguggga.....                                                                                        | 1  | 1 | seq |
| .....uucaagaaaaacuguggga.....                                                                                      | 4  | 0 | seq |
| .....uucaagaaaaacugugggaa....                                                                                      | 5  | 0 | seq |
| .....Cucaagaaaaacugugggaaa...                                                                                      | 1  | 1 | seq |
| .....uucaagaaaaacugugggaaa...                                                                                      | 18 | 0 | seq |
| .....uucaagaaaaacugugggaaG...                                                                                      | 2  | 1 | seq |
| .....uucaagaaaaacugugggaaaU..                                                                                      | 20 | 1 | seq |
| .....ucaagaaaaacugugggaaaU..                                                                                       | 1  | 1 | seq |
| .....ucaagaaaaacugugggaaaUc.                                                                                       | 2  | 1 | seq |
| .....caagaaaaacugugggaa.....                                                                                       | 1  | 0 | seq |
| .....aagGaaacugugggaaa....                                                                                         | 1  | 1 | seq |
| .....aagaaaaacugugggaaa....                                                                                        | 6  | 0 | seq |

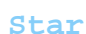[illegible]

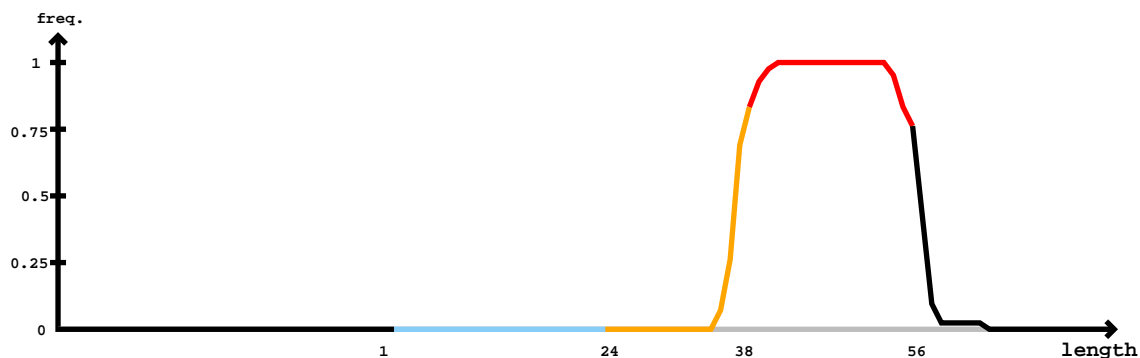

## Mature

| 5'                                                                              | acaa <u>uuccacuc</u> cugaa <u>uugucuc</u> uu <u>acacg</u> <u>cggguagg</u> gg <u>uaggcc</u> cu <u>gguc</u> ca <u>aguuuu</u> aa <u>acagggcuc</u> g <u>auac</u> ca <u>ugua</u> agg <u>ucuc</u> ug <u>ucccc</u> ac | -3' | exp    |  |
|---------------------------------------------------------------------------------|----------------------------------------------------------------------------------------------------------------------------------------------------------------------------------------------------------------|-----|--------|--|
| ((((((((.....))))))....(((((((.....(((.....(((.....)))))))))))).)).)).)))))))). | reads                                                                                                                                                                                                          | mm  | sample |  |
| .....Uaccaggggcucugauaccaug.....                                                | 2                                                                                                                                                                                                              | 1   | seq    |  |
| .....Naccaggggcucugauaccaug.....                                                | 1                                                                                                                                                                                                              | 1   | seq    |  |
| .....accaggggcucugauacc.....                                                    | 2                                                                                                                                                                                                              | 0   | seq    |  |
| .....accaggggcucugauacca.....                                                   | 1                                                                                                                                                                                                              | 0   | seq    |  |
| .....aAcaggggcucugauacc <u>au</u> .....                                         | 1                                                                                                                                                                                                              | 1   | seq    |  |
| .....accaggggcucugauaccaug.....                                                 | 1                                                                                                                                                                                                              | 0   | seq    |  |
| .....accGgggcucugauaccaug.....                                                  | 1                                                                                                                                                                                                              | 1   | seq    |  |
| .....acUaggggcucugauaccaug.....                                                 | 1                                                                                                                                                                                                              | 1   | seq    |  |
| .....accaggggcucugauaccaug.....                                                 | 1                                                                                                                                                                                                              | 0   | seq    |  |
| .....ccaggggUucugauacca.....                                                    | 1                                                                                                                                                                                                              | 1   | seq    |  |
| .....ccaggggcucugauaGca.....                                                    | 1                                                                                                                                                                                                              | 1   | seq    |  |
| .....ccaggggcucugauacca.....                                                    | 2                                                                                                                                                                                                              | 0   | seq    |  |
| .....ccaggggcucugauacc <u>au</u> .....                                          | 2                                                                                                                                                                                                              | 0   | seq    |  |
| .....ccaggggcucugauacc <u>au</u> A.....                                         | 1                                                                                                                                                                                                              | 1   | seq    |  |
| .....cUaggggcucugauaccaug.....                                                  | 2                                                                                                                                                                                                              | 1   | seq    |  |
| .....ccaggggcucugauaccaug.....                                                  | 3                                                                                                                                                                                                              | 0   | seq    |  |
| .....ccaggggcucugauGccaug.....                                                  | 1                                                                                                                                                                                                              | 1   | seq    |  |
| .....Acaggggcucugauaccaug.....                                                  | 1                                                                                                                                                                                                              | 1   | seq    |  |
| .....ccaggggcucugauaccaug.....                                                  | 3                                                                                                                                                                                                              | 0   | seq    |  |
| .....ccaggggcucugauaccaugA.....                                                 | 1                                                                                                                                                                                                              | 1   | seq    |  |
| .....caggggcucugauaccaug.....                                                   | 5                                                                                                                                                                                                              | 0   | seq    |  |
| .....caAggcucugauaccaug.....                                                    | 1                                                                                                                                                                                                              | 1   | seq    |  |
| .....aggAcucugauaccaug.....                                                     | 1                                                                                                                                                                                                              | 1   | seq    |  |
| .....agAgcucugauaccaug.....                                                     | 1                                                                                                                                                                                                              | 1   | seq    |  |
| .....aggggcucugauaccaugU.....                                                   | 1                                                                                                                                                                                                              | 1   | seq    |  |
| .....aUgggcucugauaccaug <u>u</u> aaagg.....                                     | 1                                                                                                                                                                                                              | 1   | seq    |  |
| .....gAgcucugauaccaug.....                                                      | 1                                                                                                                                                                                                              | 1   | seq    |  |
| .....gCgcucugauaccaug.....                                                      | 1                                                                                                                                                                                                              | 1   | seq    |  |
| .....ggcucugauaccaugA.....                                                      | 1                                                                                                                                                                                                              | 1   | seq    |  |

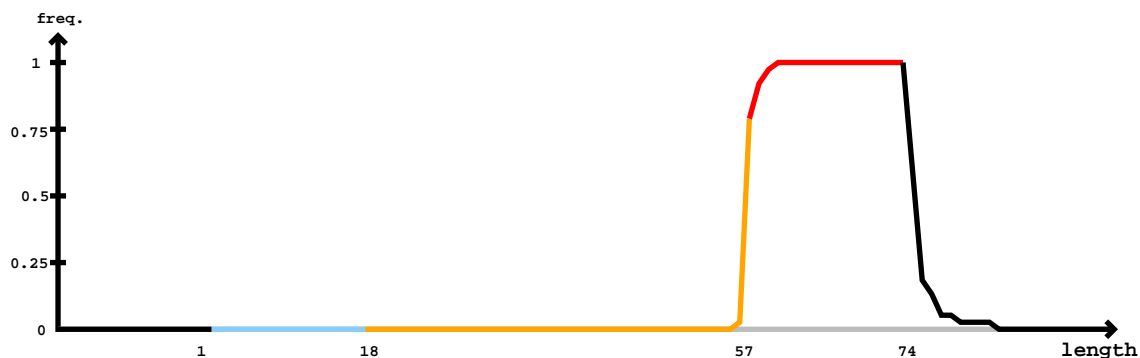

## Mature

[illegible]

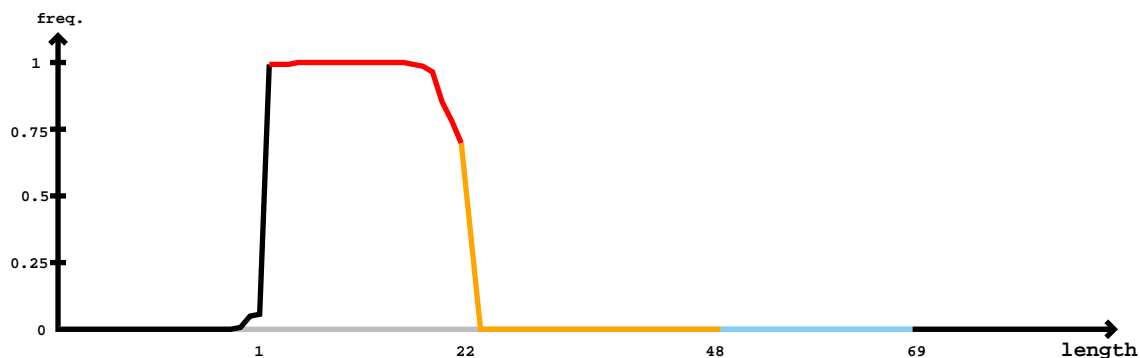

Star

[illegible]

[illegible]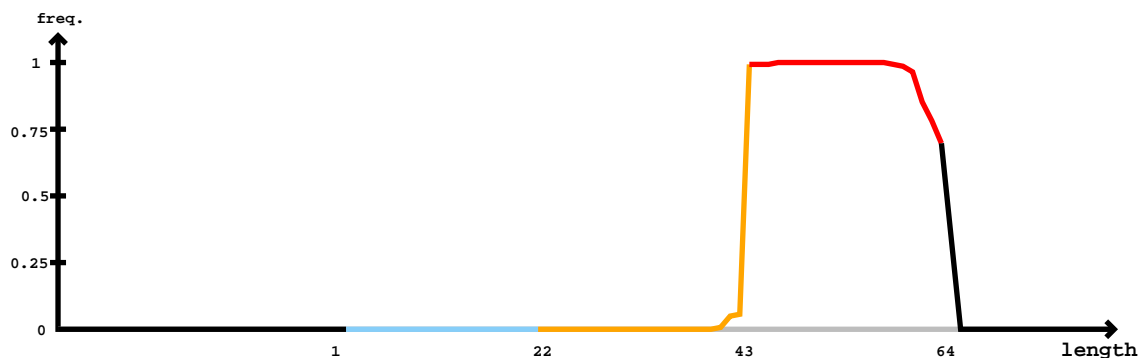

## Mature

[illegible]

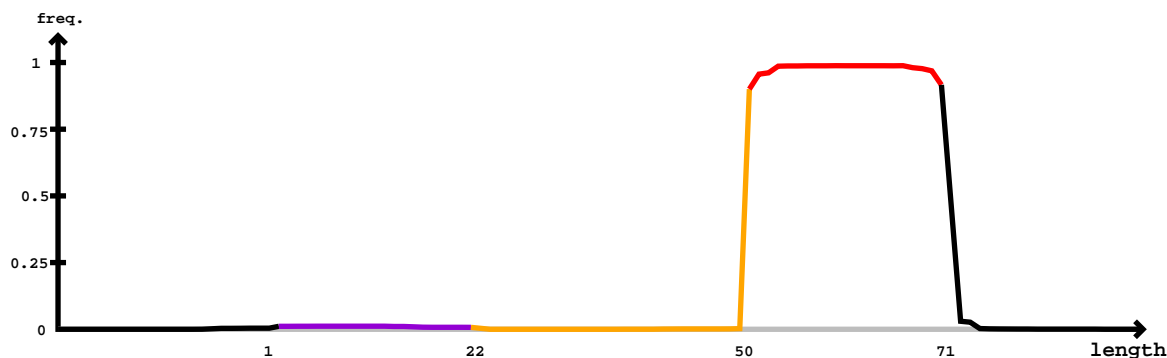

## Mature

[illegible]

Star

## Mature

agcaguaaaagugccagaaggaaaagauauagcagucaaaguucucucauuguucuccaaacaagugaacuuuuacugcuauaucuuuuccuucuuugcaauuuuaccauug

|                                   |      |   |     |
|-----------------------------------|------|---|-----|
| .uuuuacugcuaauaucuuuC.....        | 3    | 1 | seq |
| .uuuuacugcuaauaucuCuuc.....       | 1    | 1 | seq |
| .uuuuacugcuaauaucuuuCc.....       | 2    | 1 | seq |
| .uuGuacugcuaauaucuuuuc.....       | 1    | 1 | seq |
| .uuuuacugcuaauaucuuuuc.....       | 222  | 0 | seq |
| .uuuuacugcuaauaucuuuuA.....       | 1    | 1 | seq |
| .uuuuGcugcuaauaucuuuuc.....       | 2    | 1 | seq |
| .uuuuacugcuaauaucuuuuU.....       | 6    | 1 | seq |
| .uuuuacugcuaauaucuuuuAc.....      | 1    | 1 | seq |
| .uuuuacugcuaauaCcuuuuc.....       | 2    | 1 | seq |
| .Auuuacugcuaauaucuuuuc.....       | 1    | 1 | seq |
| .uuuuacugcuaauaucuuuuAc.....      | 5    | 1 | seq |
| .uuuuacugcuUuaucuuuuuc.....       | 2    | 1 | seq |
| .uuuCaugcuaauaucuuuuuc.....       | 5    | 1 | seq |
| .uuuuGcugcuaauaucuuuuuc.....      | 7    | 1 | seq |
| .uuuuacugcuaauaucuuCucc.....      | 12   | 1 | seq |
| .uuuuUcugcuaauaucuuuuuc.....      | 1    | 1 | seq |
| .uuuuacugcuaauaGcuuuuuc.....      | 1    | 1 | seq |
| .uuGuacugcuaauaucuuuuuc.....      | 2    | 1 | seq |
| .uuuuacugcuCuauaucuuuuc.....      | 1    | 1 | seq |
| .uCuuaugcuaauaucuuuuuc.....       | 9    | 1 | seq |
| .uuuuacugcuaauaucuuuuG.....       | 3    | 1 | seq |
| .uuuuacugcuaauaAcAuuuuc.....      | 1    | 1 | seq |
| .uuuuacugcuaauaucuuuuUc.....      | 7    | 1 | seq |
| .uuuuacCgcuauaucuuuuuc.....       | 5    | 1 | seq |
| .uuuuacugcuGuauaucuuuuc.....      | 6    | 1 | seq |
| .uuuuacugcuaCauaucuuuuc.....      | 6    | 1 | seq |
| .uuuuacugAuaauaucuuuuuc.....      | 1    | 1 | seq |
| .uuuuacugcuaauaucuuuCc.....       | 4    | 1 | seq |
| .uuuuacugcuauGcuuuuuc.....        | 6    | 1 | seq |
| .uuuuacugcuaauaucuCuuc.....       | 5    | 1 | seq |
| .Cuuuacugcuaauaucuuuuuc.....      | 16   | 1 | seq |
| .uuuuacugUuaauaucuuuuuc.....      | 3    | 1 | seq |
| .Nuuuacugcuaauaucuuuuuc.....      | 5    | 1 | seq |
| .uuuuacugcuaauaAuuuuc.....        | 2    | 1 | seq |
| .Guuuacugcuaauaucuuuuuc.....      | 6    | 1 | seq |
| .Auuuacugcuaauaucuuuuuc.....      | 1    | 1 | seq |
| .uuuuUugcuaauaucuuuuuc.....       | 3    | 1 | seq |
| .uuuuacugcCauaucuuuuuc.....       | 10   | 1 | seq |
| .uuuuacugcuaauaucuuuuuc.....      | 3508 | 0 | seq |
| .uuuuacuAcuaauaucuuuuuc.....      | 3    | 1 | seq |
| .uuuuacugcuaauaucuuuuU.....       | 244  | 1 | seq |
| .uuuuacugcuaauaUuuuuuc.....       | 1    | 1 | seq |
| .uuCuacugcuaauaucuuuuuc.....      | 4    | 1 | seq |
| .uuuuacugcuaauaucCuuuuc.....      | 29   | 1 | seq |
| .uuuuacugcuaauaucuuuuAc.....      | 84   | 1 | seq |
| .uuuuacGgcuaauaucuuuuuc.....      | 4    | 1 | seq |
| .uuuuacugcuaaCcuuuuuc.....        | 8    | 1 | seq |
| .uGuuaugcuaauaucuuuuuc.....       | 1    | 1 | seq |
| .uAuuaugcuaauaucuuuuuc.....       | 1    | 1 | seq |
| .uuuuacAgcuaauaucuuuuccu.....     | 3    | 1 | seq |
| .uuuuacugcuaauaucuuuuAc.....      | 2    | 1 | seq |
| .uuuuacugcuaauaucuuuuccu.....     | 8    | 0 | seq |
| .uuuuacugcuaauaucuuuuUu.....      | 2    | 1 | seq |
| .uuuuacugcuaauaucuuuuUcu.....     | 1    | 1 | seq |
| .uuuuacugcuaauaucuuuuCc.....      | 3    | 1 | seq |
| .uuuuacugcuaauaucuuuuccuGc.....   | 1    | 1 | seq |
| .uuuuacugcuaauaucuuuuccuuU.....   | 2    | 1 | seq |
| .uuuuacugcuaauaucuuuuccuuAu.....  | 1    | 1 | seq |
| .uuuuacugcuaauaucuuuuCcCucu.....  | 1    | 1 | seq |
| .uuuuacugcuaauaucuuuuccuuUuu..... | 1    | 1 | seq |
| .uuuacugcuaauaucuuC.....          | 1    | 1 | seq |
| .uuuacugcuaauaucuuu.....          | 1    | 0 | seq |
| .uuuacugcuaauaucuuuu.....         | 3    | 0 | seq |
| .uuuacugcuaauaucuuuC.....         | 1    | 1 | seq |
| .uuuacugcuaauaucuuuuuc.....       | 6    | 0 | seq |
| .uuuacCgcuaauaucuuuuuc.....       | 2    | 1 | seq |
| .uuuacugcuaauaucuuuuuc.....       | 27   | 0 | seq |
| .uuuacugcuaauaucuuuuU.....        | 2    | 1 | seq |
| .uuuacugcuaauaucuuuuAcAu.....     | 2    | 1 | seq |



## Star

## Mature

|                       |                  |                               |                 |                          |      |     |
|-----------------------|------------------|-------------------------------|-----------------|--------------------------|------|-----|
| agcaguaaaagugccagaagg | aaaagauauagcaguc | aaagucucucauugucuccaaacaaguga | acuuuuacugcuaua | ucuuuuuccuucugcaauuuuacc | auug |     |
| .....                 | uuuacugU         | uaauaucuuuuccu                | .....           | 1                        | 1    | seq |
| .....                 | Cuuacugcuaua     | ucuuuuccu                     | .....           | 1                        | 1    | seq |
| .....                 | uuuacugcuaua     | ucuuuuccu                     | .....           | 171                      | 0    | seq |
| .....                 | uuuacugcuaua     | ucCuuuccu                     | .....           | 2                        | 1    | seq |
| .....                 | uuuacAgcuaua     | ucuuuuccu                     | .....           | 1                        | 1    | seq |
| .....                 | uuuacugcuaua     | ucuuuccC                      | .....           | 30                       | 1    | seq |
| .....                 | uuuagGugcuaua    | ucuuuuccu                     | .....           | 1                        | 1    | seq |
| .....                 | uuuacugcuaua     | ucuuuUcu                      | .....           | 1                        | 1    | seq |
| .....                 | uuuacugcuaua     | ucuuuccG                      | .....           | 6                        | 1    | seq |
| .....                 | uuuacugcuauG     | ucuuuuccu                     | .....           | 1                        | 1    | seq |
| .....                 | uuuacugcuaua     | ucuuuccA                      | .....           | 11                       | 1    | seq |
| .....                 | uuuGcugcuaua     | ucuuuuccu                     | .....           | 1                        | 1    | seq |
| .....                 | uuuacugcuaua     | ucuuuccuu                     | .....           | 1                        | 0    | seq |
| .....                 | uuacugcuaua      | ucuuuuc                       | .....           | 3                        | 0    | seq |
| .....                 | uuacugcuaua      | ucuuuucU                      | .....           | 1                        | 1    | seq |
| .....                 | uuacugcuaua      | ucuuuucc                      | .....           | 4                        | 0    | seq |
| .....                 | uuacugcuaua      | ucuuuuccuu                    | .....           | 12                       | 0    | seq |
| .....                 | uuacugcuaua      | ucuuuuccuC                    | .....           | 3                        | 1    | seq |
| .....                 | uuacugcuaua      | ucuuuuccuG                    | .....           | 1                        | 1    | seq |
| .....                 | uacugcuaua       | ucuuuuc                       | .....           | 3                        | 0    | seq |
| .....                 | uacugcuaua       | ucuuuucc                      | .....           | 4                        | 0    | seq |
| .....                 | uacugcuaua       | ucuuuuccu                     | .....           | 2                        | 0    | seq |
| .....                 | uacugcuaua       | ucuuuuccuuc                   | .....           | 101                      | 0    | seq |
| .....                 | uGcugcuaua       | ucuuuuccuuc                   | .....           | 1                        | 1    | seq |
| .....                 | uacugcuaua       | ucuuuuccuuA                   | .....           | 2                        | 1    | seq |
| .....                 | uacGgcua         | uaucuuuuccuuc                 | .....           | 1                        | 1    | seq |
| .....                 | uacugcuaua       | ucuuuuccuuU                   | .....           | 4                        | 1    | seq |
| .....                 | uacugcuaua       | ucuuuCCuuc                    | .....           | 1                        | 1    | seq |
| .....                 | uacugcuGu        | uaucuuuuccuuc                 | .....           | 1                        | 1    | seq |
| .....                 | uacugcuaua       | Ccuuuuccuuc                   | .....           | 1                        | 1    | seq |
| .....                 | acugcuaua        | ucuuuuccuuc                   | .....           | 1                        | 0    | seq |
| .....                 | acugcuaua        | ucuuuuccuuA                   | .....           | 1                        | 1    | seq |
| .....                 | acugcuaua        | ucuuuuccuucu                  | .....           | 1                        | 0    | seq |
| .....                 | acugcuaua        | ucuuuuccuucC                  | .....           | 1                        | 1    | seq |
| .....                 | ugcuaua          | ucuuuuccuucuu                 | .....           | 1                        | 0    | seq |
| .....                 | ugcuaua          | ucuuuuccuucug                 | .....           | 1                        | 0    | seq |
| .....                 | ugcuaua          | ucuuuuccCucuugc               | .....           | 1                        | 1    | seq |
| .....                 | uaauucuuuuccuuc  | ugcaa                         | .....           | 2                        | 0    | seq |
| .....                 | uuuccuucug       | caauuuuacA                    | .....           | 2                        | 1    | seq |

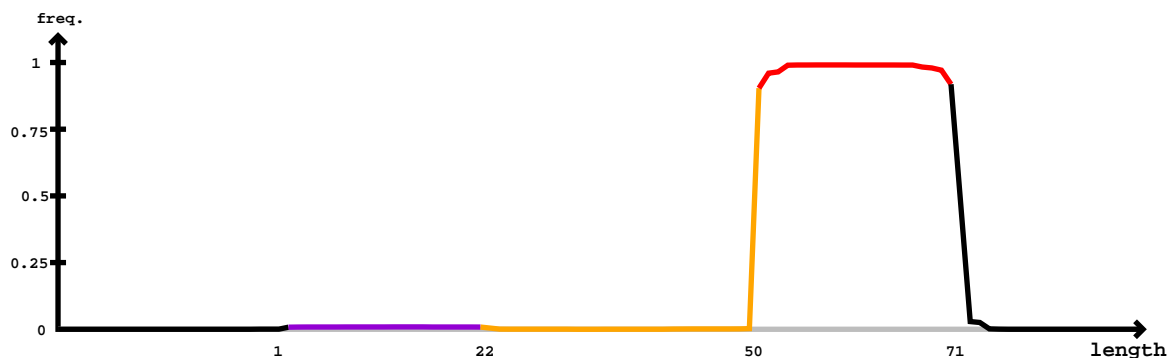

## Mature

[illegible]

## Star

## Mature

uaacaguaaaagugccagagggaagaaagauuagcagucuaaagugcucucacauuguccuccaagcaagugaacuuuuuacugcuauaucuuuuccuuuuuacaaauuuuaccaau

|                                        |      |   |     |
|----------------------------------------|------|---|-----|
| .....uuuuuacugcuauaCcuuuuc.....        | 2    | 1 | seq |
| .....uuuuGcugcuauaucuuuuc.....         | 2    | 1 | seq |
| .....Auuuuacugcuauaucuuuuc.....        | 1    | 1 | seq |
| .....uuuuuacugcuauaucuCuuc.....        | 1    | 1 | seq |
| .....uuuuuacugcuauaucuuuuc.....        | 222  | 0 | seq |
| .....uuuuuacugcuauaucuuuuA.....        | 1    | 1 | seq |
| .....uuCuacugcuauaucuuuucc.....        | 4    | 1 | seq |
| .....uuuuuacugcuauaCcuuuuuc.....       | 8    | 1 | seq |
| .....uuuuuacCgcuauaucuuuucc.....       | 5    | 1 | seq |
| .....uuuuuacugcuauaucuuuuU.....        | 244  | 1 | seq |
| .....uuuuuUugcuauaucuuuucc.....        | 3    | 1 | seq |
| .....uuuuuacugcuauauAuuuuuc.....       | 2    | 1 | seq |
| .....Guuuuacugcuauaucuuuucc.....       | 6    | 1 | seq |
| .....uuuuuacuAcuauaucuuuucc.....       | 3    | 1 | seq |
| .....uuuuuacugcuauaucuuuuuA.....       | 84   | 1 | seq |
| .....Nuuuuacugcuauaucuuuucc.....       | 5    | 1 | seq |
| .....uuuuuacugcuauaGcuuuuuc.....       | 1    | 1 | seq |
| .....Auuuuacugcuauaucuuuucc.....       | 1    | 1 | seq |
| .....uuuCaugcuauaucuuuucc.....         | 5    | 1 | seq |
| .....uuuuuacugcuauaucuuuucc.....       | 3508 | 0 | seq |
| .....uuuuuacugcuauaucuuuCC.....        | 4    | 1 | seq |
| .....uuuuuacugcuUuauaucuuuucc.....     | 2    | 1 | seq |
| .....uuuuuacugcuGuauaucuuuucc.....     | 6    | 1 | seq |
| .....uuGuuacugcuauaucuuuucc.....       | 2    | 1 | seq |
| .....uuuuuacugcCauaucuuuucc.....       | 10   | 1 | seq |
| .....uuuuGcugcuauaucuuuucc.....        | 7    | 1 | seq |
| .....uAuuuacugcuauaucuuuucc.....       | 1    | 1 | seq |
| .....uuuuuacugcuauGucuuuucc.....       | 6    | 1 | seq |
| .....uuuuuacugcuauauCuuuuc.....        | 1    | 1 | seq |
| .....uuuuuacugcuauaucCuuucc.....       | 29   | 1 | seq |
| .....Cuuuuacugcuauaucuuuucc.....       | 16   | 1 | seq |
| .....uuuuuacugAuauaucuuuucc.....       | 1    | 1 | seq |
| .....uuuuuacugcuCuauaucuuuucc.....     | 1    | 1 | seq |
| .....uuuuuacugcuauaucuuuUc.....        | 7    | 1 | seq |
| .....uuuuUcugcuauaucuuuucc.....        | 1    | 1 | seq |
| .....uuuuuacugcuauaucuuuAc.....        | 5    | 1 | seq |
| .....uuuuuacugcuauaucuuCuucc.....      | 12   | 1 | seq |
| .....uuuuuacugUuauaucuuuucc.....       | 3    | 1 | seq |
| .....uGuuuacugcuauaucuuuucc.....       | 1    | 1 | seq |
| .....uuuuuacGgcuauaucuuuucc.....       | 4    | 1 | seq |
| .....uuuuuacugcuCaucuuuucc.....        | 6    | 1 | seq |
| .....uuuuuacugcuauauUuuuucc.....       | 1    | 1 | seq |
| .....uuuuuacugcuauaucuCuucc.....       | 5    | 1 | seq |
| .....uCuuuacugcuauaucuuuucc.....       | 9    | 1 | seq |
| .....uuuuuacugcuauaucuuuuG.....        | 3    | 1 | seq |
| .....uuuuuacugcuauaucuuuuUu.....       | 2    | 1 | seq |
| .....uuuuuacugcuauaucuuuuuccC.....     | 3    | 1 | seq |
| .....uuuuuacAgcuauaucuuuuuccu.....     | 3    | 1 | seq |
| .....uuuuuacugcuauaucuuuuuccu.....     | 8    | 0 | seq |
| .....uuuuuacugcuauaucuuuuUcu.....      | 1    | 1 | seq |
| .....uuuuuacugcuauaucuuuuuccA.....     | 2    | 1 | seq |
| .....uuuuuacugcuauaucuuuuuccuuU.....   | 2    | 1 | seq |
| .....uuuuuacugcuauaucuuuuuccuGc.....   | 1    | 1 | seq |
| .....uuuuuacugcuauaucuuuuuccuuAu.....  | 1    | 1 | seq |
| .....uuuuuacugcuauaucuuuuuccCucu.....  | 1    | 1 | seq |
| .....uuuuuacugcuauaucuuuuuccuuUuu..... | 1    | 1 | seq |
| .....uuuuuacugcuauaucuuC.....          | 1    | 1 | seq |
| .....uuuuuacugcuauaucuuu.....          | 1    | 0 | seq |
| .....uuuuuacugcuauaucuuuC.....         | 1    | 1 | seq |
| .....uuuuuacugcuauaucuuuu.....         | 3    | 0 | seq |
| .....uuuuuacugcuauaucuuuuuc.....       | 6    | 0 | seq |
| .....uuuuuacugcuauaucuuuuucc.....      | 27   | 0 | seq |
| .....uuuuuacugcuauaucuuuuU.....        | 2    | 1 | seq |
| .....uuuuuacCgcuauaucuuuuucc.....      | 2    | 1 | seq |
| .....uuuuuacugcuauGucuuuuuccu.....     | 1    | 1 | seq |
| .....uuuuuGugcuauaucuuuuuccu.....      | 1    | 1 | seq |
| .....uuuuuacAgcuauaucuuuuuccu.....     | 1    | 1 | seq |
| .....uuuGcugcuauaucuuuuuccu.....       | 1    | 1 | seq |
| .....uuuuuacugcuauaucuuuuuccC.....     | 30   | 1 | seq |
| .....uuuuuacugcuauaucuuuuuccA.....     | 11   | 1 | seq |

## Star

## Mature

|                                                                                                                    |     |   |     |
|--------------------------------------------------------------------------------------------------------------------|-----|---|-----|
| uaacaguaaaagugccagagggaaaagauuagcagucaaagugcucucauuguccuccaagcaagugaacuuuuuacugcuaauaucuuuuuccuuucuuacaauuuuaccaau |     |   |     |
| .....Cuuaucugcuaauaucuuuuuccu.....                                                                                 | 1   | 1 | seq |
| .....uuuacugcuaauaucuuuuuccu.....                                                                                  | 171 | 0 | seq |
| .....uuuacugcuaauaucuuuuuccG.....                                                                                  | 6   | 1 | seq |
| .....uuuacugUuaauaucuuuuuccu.....                                                                                  | 1   | 1 | seq |
| .....uuuacugcuaauaucuuuuucAu.....                                                                                  | 2   | 1 | seq |
| .....uuuacugcuaauaucuuuuuUcu.....                                                                                  | 1   | 1 | seq |
| .....uuuacugcuaauaucuuuuuccu.....                                                                                  | 2   | 1 | seq |
| .....uuuacugcuaauaucuuuuuccuu.....                                                                                 | 1   | 0 | seq |
| .....uuacugcuaauaucuuuuuc.....                                                                                     | 3   | 0 | seq |
| .....uuacugcuaauaucuuuuucc.....                                                                                    | 4   | 0 | seq |
| .....uuacugcuaauaucuuuuucU.....                                                                                    | 1   | 1 | seq |
| .....uuacugcuaauaucuuuuuccuC.....                                                                                  | 3   | 1 | seq |
| .....uuacugcuaauaucuuuuuccuu.....                                                                                  | 12  | 0 | seq |
| .....uuacugcuaauaucuuuuuccuG.....                                                                                  | 1   | 1 | seq |
| .....uacugcuaauaucuuuuuc.....                                                                                      | 3   | 0 | seq |
| .....uacugcuaauaucuuuuucc.....                                                                                     | 4   | 0 | seq |
| .....uacugcuaauaucuuuuuccu.....                                                                                    | 2   | 0 | seq |
| .....uacugcuaauaucuuuuCccuuc.....                                                                                  | 1   | 1 | seq |
| .....uacugcuaauaucuuuuuccuuA.....                                                                                  | 2   | 1 | seq |
| .....uacCgcuaauaucuuuuuccuuc.....                                                                                  | 1   | 1 | seq |
| .....uacugcuaauaucuuuuuccuuU.....                                                                                  | 4   | 1 | seq |
| .....uacugcuaauaucuuuuuccuuc.....                                                                                  | 101 | 0 | seq |
| .....uacugcuGuauaucuuuuuccuuc.....                                                                                 | 1   | 1 | seq |
| .....uacugcuaaCcuuuuccuuc.....                                                                                     | 1   | 1 | seq |
| .....uGcugcuaauaucuuuuuccuuc.....                                                                                  | 1   | 1 | seq |
| .....acugcuaauaucuuuuuccuuc.....                                                                                   | 1   | 0 | seq |
| .....acugcuaauaucuuuuuccuucU.....                                                                                  | 1   | 0 | seq |
| .....acugcuaauaucuuuuuccuucA.....                                                                                  | 1   | 1 | seq |
| .....acugcuaauaucuuuuuccuucC.....                                                                                  | 1   | 1 | seq |
| .....ugcuaauaucuuuuuccuucuu.....                                                                                   | 1   | 0 | seq |

Provisional ID : MA\_18595\_3427  
 Score total : 4412.6  
 Score for star read(s) : 3.9  
 Score for read counts : 4491.7  
 Score for mfe : -80.7  
 Score for randfold : -2.2  
 Score for cons. seed :  
 Total read count : 8822  
 Mature read count : 8821  
 Loop read count : 0  
 Star read count : 1

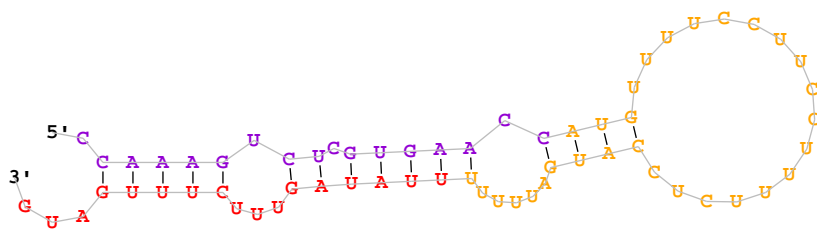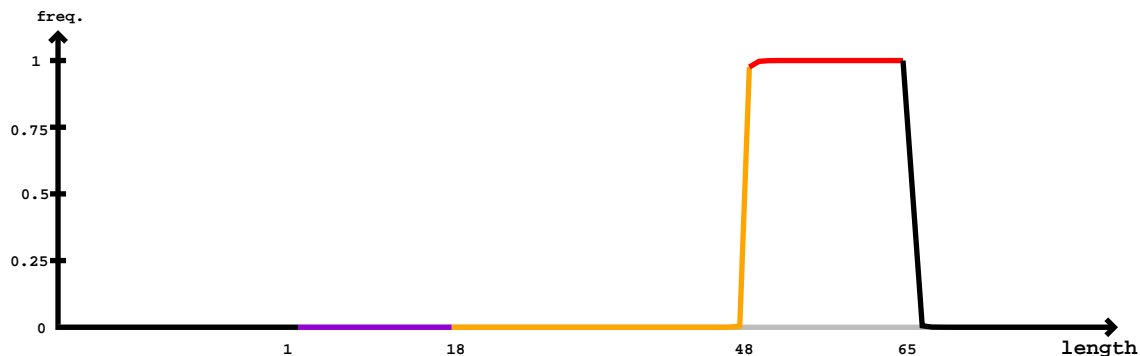

## Star

## Mature

| 5' -                                                                    | 3'               | obs                                            | exp                     | reads | mm | sample |
|-------------------------------------------------------------------------|------------------|------------------------------------------------|-------------------------|-------|----|--------|
| auguguaauucuccuccaguuu                                                  | ccaagucucgugaacc | auguuuuccuuccuuuucccaugauuuuuuuauaguuucuuugaug | auguuuauagaucuaguguaaaa | 1     | 1  | seq    |
| auguguaauucuccuccaguuu                                                  | ccaagucucgugaacc | auguuuuccuuccuuuucccaugauuuuuuuauaguuucuuugaug | auguuuauagaucuaguguaaaa | 1     | 1  | seq    |
| .....(((.....(((.....(((.....(((.....)))).....)))).....)))).....))..... | ccaagucucUgaacc  | .....                                          | .....                   | 1     | 1  | seq    |
| .....                                                                   | .....            | .....                                          | .....                   | 1     | 1  | seq    |
| .....                                                                   | .....            | .....                                          | .....                   | 1     | 1  | seq    |
| .....                                                                   | .....            | .....                                          | .....                   | 1     | 1  | seq    |
| .....                                                                   | .....            | .....                                          | .....                   | 1     | 1  | seq    |
| .....                                                                   | .....            | .....                                          | .....                   | 10    | 0  | seq    |
| .....                                                                   | .....            | .....                                          | .....                   | 1     | 1  | seq    |
| .....                                                                   | .....            | .....                                          | .....                   | 12    | 1  | seq    |
| .....                                                                   | .....            | .....                                          | .....                   | 1     | 1  | seq    |
| .....                                                                   | .....            | .....                                          | .....                   | 6     | 1  | seq    |
| .....                                                                   | .....            | .....                                          | .....                   | 1     | 1  | seq    |
| .....                                                                   | .....            | .....                                          | .....                   | 10    | 1  | seq    |
| .....                                                                   | .....            | .....                                          | .....                   | 2     | 1  | seq    |
| .....                                                                   | .....            | .....                                          | .....                   | 3     | 1  | seq    |
| .....                                                                   | .....            | .....                                          | .....                   | 8104  | 0  | seq    |
| .....                                                                   | .....            | .....                                          | .....                   | 1     | 1  | seq    |
| .....                                                                   | .....            | .....                                          | .....                   | 1     | 1  | seq    |
| .....                                                                   | .....            | .....                                          | .....                   | 12    | 1  | seq    |
| .....                                                                   | .....            | .....                                          | .....                   | 2     | 1  | seq    |
| .....                                                                   | .....            | .....                                          | .....                   | 1     | 1  | seq    |
| .....                                                                   | .....            | .....                                          | .....                   | 3     | 1  | seq    |
| .....                                                                   | .....            | .....                                          | .....                   | 1     | 1  | seq    |
| .....                                                                   | .....            | .....                                          | .....                   | 18    | 1  | seq    |
| .....                                                                   | .....            | .....                                          | .....                   | 2     | 1  | seq    |
| .....                                                                   | .....            | .....                                          | .....                   | 7     | 1  | seq    |
| .....                                                                   | .....            | .....                                          | .....                   | 3     | 1  | seq    |
| .....                                                                   | .....            | .....                                          | .....                   | 17    | 1  | seq    |
| .....                                                                   | .....            | .....                                          | .....                   | 7     | 1  | seq    |
| .....                                                                   | .....            | .....                                          | .....                   | 1     | 1  | seq    |
| .....                                                                   | .....            | .....                                          | .....                   | 1     | 1  | seq    |
| .....                                                                   | .....            | .....                                          | .....                   | 308   | 0  | seq    |
| .....                                                                   | .....            | .....                                          | .....                   | 3     | 1  | seq    |

## Star

## Mature

auguguaauucuccuccaguuuccaaagucucgugaaccaguuuuuccuuuuucuccaugauuuuuuuuuuaguuuuuuuugaugauguuuugaucuaguguaaaa

|                                  |     |   |     |
|----------------------------------|-----|---|-----|
| .....uCauaguuuuuuuugauga.....    | 1   | 1 | seq |
| .....uuauaguuCuuuugauga.....     | 2   | 1 | seq |
| .....uuauaguuuuuuuugaugC.....    | 48  | 1 | seq |
| .....uuauaguuuuuCuuugauga.....   | 1   | 1 | seq |
| .....uuauaguuuuuCugauga.....     | 1   | 1 | seq |
| .....uuauaguuuuuCugauga.....     | 2   | 1 | seq |
| .....uuauaguuuuuuuugaugau.....   | 6   | 0 | seq |
| .....uuauaguuuuuuuugaugCu.....   | 2   | 1 | seq |
| .....uuauaguuuuuuuugaugGugu..... | 1   | 1 | seq |
| .....uuauaguuuuuuuugauga.....    | 159 | 0 | seq |
| .....Aauaguuuuuuuugauga.....     | 1   | 1 | seq |
| .....uuauaguuuuuCuuugauga.....   | 1   | 1 | seq |
| .....uuauaguuuuuugaGga.....      | 2   | 1 | seq |
| .....uuauaguCuuuugauga.....      | 1   | 1 | seq |
| .....uuauaguuuuuuuugaugC.....    | 14  | 1 | seq |
| .....uuauaguuCuuuugauga.....     | 2   | 1 | seq |
| .....uuauaguuuuuugaCga.....      | 1   | 1 | seq |
| .....uuauaguuuuuuuugaugCu.....   | 2   | 1 | seq |
| .....uuauaguuuuuuuugaugau.....   | 4   | 0 | seq |
| .....aAaguuuuuuuugaugau.....     | 1   | 1 | seq |
| .....auaguuuuuuuugaugau.....     | 14  | 0 | seq |
| .....auaguuuuuuuugaugCu.....     | 7   | 1 | seq |
| .....auaguuuuuCugaugaug.....     | 1   | 1 | seq |
| .....auaguuuuuuuugaugaCg.....    | 1   | 1 | seq |
| .....uaguuuuuuuugaugUug.....     | 1   | 1 | seq |
| .....uaguuuuuuuugaugCug.....     | 1   | 1 | seq |
| .....uaguuuuuuuugaugGugu.....    | 1   | 1 | seq |

Provisional ID : MA\_18986\_1036  
 Score total : 1.6  
 Score for star read(s) : -1.3  
 Score for read counts : 0  
 Score for mfe : 1.3  
 Score for randfold : 1.6  
 Score for cons. seed :  
 Total read count : 48694  
 Mature read count : 48694  
 Loop read count : 0  
 Star read count : 0

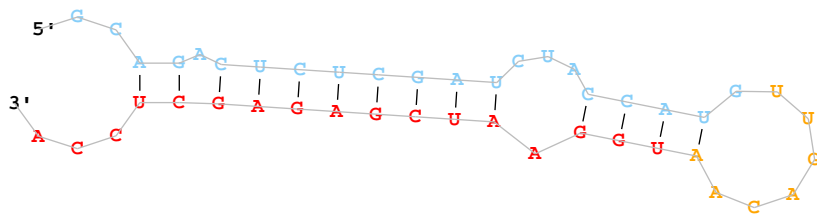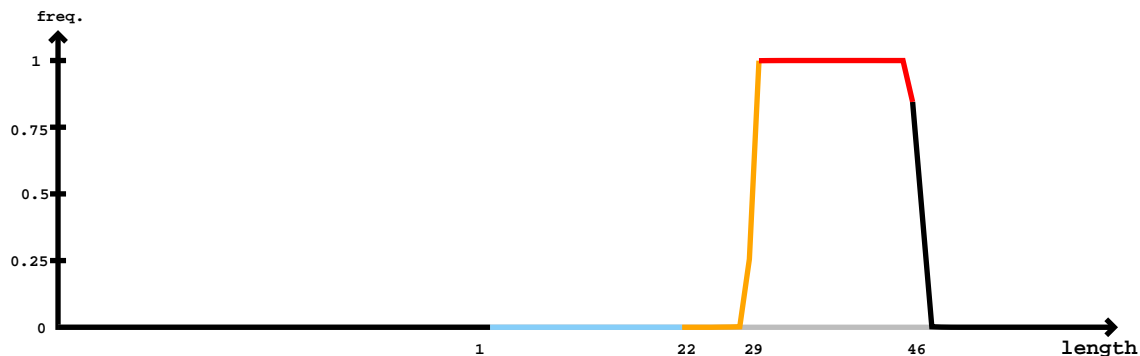

|    |                                                                                                    | Star                   |  | Mature                    |  |       |     |        |  |
|----|----------------------------------------------------------------------------------------------------|------------------------|--|---------------------------|--|-------|-----|--------|--|
| 5' |                                                                                                    |                        |  |                           |  | -3'   | exp |        |  |
|    | gaggcugaugcucucucaaagagggcccuuggcgaggaaucg                                                         | gcagacucucgaucuaaccaug |  | uugacaauggaauucgagagcucca |  |       |     |        |  |
|    | ...(((.(.((((((.....))))))..).)).(((.....(((.(.((((((.....((((.....)))))).....)))))).....))))..... |                        |  |                           |  | reads | mm  | sample |  |
|    | .....Gcaauggaauucgagagc.....                                                                       |                        |  |                           |  | 1     | 1   | seq    |  |
|    | .....acCauggaauucgagagc.....                                                                       |                        |  |                           |  | 2     | 1   | seq    |  |
|    | .....acCauggaauucgagagcucc.....                                                                    |                        |  |                           |  | 1     | 1   | seq    |  |
|    | .....acCauggaauucgagagcucca.....                                                                   |                        |  |                           |  | 13    | 1   | seq    |  |
|    | .....cUauggaauucgagagcucc.....                                                                     |                        |  |                           |  | 13    | 1   | seq    |  |
|    | .....cUauggaauucgagagcucca.....                                                                    |                        |  |                           |  | 1     | 1   | seq    |  |
|    | .....caaGggaauucgagagcucc.....                                                                     |                        |  |                           |  | 1     | 1   | seq    |  |
|    | .....Aaauggaauucgagagcucc.....                                                                     |                        |  |                           |  | 1     | 1   | seq    |  |
|    | .....cGauggaauucgagagcucc.....                                                                     |                        |  |                           |  | 1     | 1   | seq    |  |
|    | .....cUauggaauucgagagcucc.....                                                                     |                        |  |                           |  | 7     | 1   | seq    |  |
|    | .....cUauggaauucgagagcucca.....                                                                    |                        |  |                           |  | 7     | 1   | seq    |  |
|    | .....caauggaauucgagagcucca.....                                                                    |                        |  |                           |  | 1     | 0   | seq    |  |
|    | .....cCauggaauucgagagcuccacc.....                                                                  |                        |  |                           |  | 2     | 1   | seq    |  |
|    | .....Uauggaauucgagagcucc.....                                                                      |                        |  |                           |  | 1     | 1   | seq    |  |
|    | .....aUuggaauucgagagcucc.....                                                                      |                        |  |                           |  | 1     | 1   | seq    |  |
|    | .....Uauggaauucgagagcucc.....                                                                      |                        |  |                           |  | 13    | 1   | seq    |  |
|    | .....aaGggaauucgagagcucc.....                                                                      |                        |  |                           |  | 1     | 1   | seq    |  |
|    | .....Nauggaaucgagagcucc.....                                                                       |                        |  |                           |  | 3     | 1   | seq    |  |
|    | .....aauggaaucgagagcuccU.....                                                                      |                        |  |                           |  | 1     | 1   | seq    |  |
|    | .....aauggaaucgagagcucc.....                                                                       |                        |  |                           |  | 1     | 1   | seq    |  |
|    | .....Gauggaauucgagagcucc.....                                                                      |                        |  |                           |  | 4     | 1   | seq    |  |
|    | .....aaCggaauucgagagcucc.....                                                                      |                        |  |                           |  | 1     | 1   | seq    |  |
|    | .....Nauggaaucgagagcucca.....                                                                      |                        |  |                           |  | 3     | 1   | seq    |  |
|    | .....aauggaaucgagagcuccU.....                                                                      |                        |  |                           |  | 1     | 1   | seq    |  |
|    | .....aauggaaucgagagcucca.....                                                                      |                        |  |                           |  | 1     | 0   | seq    |  |
|    | .....aauggaaucgagagcuccG.....                                                                      |                        |  |                           |  | 1     | 1   | seq    |  |
|    | .....Uauggaauucgagagcucca.....                                                                     |                        |  |                           |  | 1     | 1   | seq    |  |
|    | .....aUuggaauucgagagcucca.....                                                                     |                        |  |                           |  | 2     | 1   | seq    |  |
|    | .....Gauggaauucgagagcucca.....                                                                     |                        |  |                           |  | 5     | 1   | seq    |  |
|    | .....auggaauucgagagcucc.....                                                                       |                        |  |                           |  | 6191  | 0   | seq    |  |
|    | .....auggaauucgagagcucc.....                                                                       |                        |  |                           |  | 24    | 1   | seq    |  |
|    | .....auggaauucgagagcucc.....                                                                       |                        |  |                           |  | 4     | 1   | seq    |  |
|    | .....auggaauucgagagcucc.....                                                                       |                        |  |                           |  | 1     | 1   | seq    |  |
|    | .....auggaauucgagagcucc.....                                                                       |                        |  |                           |  | 4     | 1   | seq    |  |

## Star

## Mature

gaggcugaugcucucucaaagagggcccuuggcgaggaaucgagacucucgaucuccauguugaccaauggaucgagagcuccaccuccacuuuacuguguuu

|                                |      |   |     |
|--------------------------------|------|---|-----|
| .....augCaaucgagagcucc.....    | 1    | 1 | seq |
| .....auggaaucgagagcuAc.....    | 5    | 1 | seq |
| .....auggaaUAgagagcucc.....    | 2    | 1 | seq |
| .....Uuggaaucgagagcucc.....    | 3    | 1 | seq |
| .....auggaaucgagagcucU.....    | 871  | 1 | seq |
| .....Nuggaaucgagagcucc.....    | 9    | 1 | seq |
| .....auggaaucgaUagcucc.....    | 1    | 1 | seq |
| .....auAgaucgagagcucc.....     | 2    | 1 | seq |
| .....augUaaucgagagcucc.....    | 3    | 1 | seq |
| .....auggaaCcgagagcucc.....    | 12   | 1 | seq |
| .....auggaaucgagaUcucc.....    | 1    | 1 | seq |
| .....Guggaaucgagagcucc.....    | 29   | 1 | seq |
| .....auggaaucgagagcucGc.....   | 3    | 1 | seq |
| .....auggaaucgagagcucA.....    | 221  | 1 | seq |
| .....auggaUucgagagcucc.....    | 2    | 1 | seq |
| .....auggaaucgaAagcucc.....    | 2    | 1 | seq |
| .....auggaaucgagagcuUc.....    | 11   | 1 | seq |
| .....auggaaucgagagcucG.....    | 22   | 1 | seq |
| .....Cuggaaucgagagcucc.....    | 7    | 1 | seq |
| .....aAggaaucgagagcucc.....    | 3    | 1 | seq |
| .....auggUaucgagagcucc.....    | 2    | 1 | seq |
| .....auUgaucgagagcucc.....     | 4    | 1 | seq |
| .....auggaaucUagagcucc.....    | 7    | 1 | seq |
| .....auggaaucgGagagcucc.....   | 20   | 1 | seq |
| .....auggaaucgagagcCcc.....    | 22   | 1 | seq |
| .....auggaGucgagagcucc.....    | 18   | 1 | seq |
| .....auggaaucgagagcGcc.....    | 11   | 1 | seq |
| .....auggaaucgUgagcucc.....    | 1    | 1 | seq |
| .....auggaaucgagCgcucc.....    | 2    | 1 | seq |
| .....augAaaucgagagcucc.....    | 1    | 1 | seq |
| .....auggaaucgagagcucca.....   | 4356 | 0 | seq |
| .....augAaaucgagagcucca.....   | 1    | 1 | seq |
| .....auggaUucgagagcucca.....   | 1    | 1 | seq |
| .....auAgaucgagagcucca.....    | 8    | 1 | seq |
| .....auggaaucgagagcGcca.....   | 8    | 1 | seq |
| .....Cuggaaucgagagcucca.....   | 3    | 1 | seq |
| .....auggaGucgagagcucca.....   | 16   | 1 | seq |
| .....Uuggaaucgagagcucca.....   | 6    | 1 | seq |
| .....auggaaucgagagcucUa.....   | 4    | 1 | seq |
| .....auggaaCcgagagcucca.....   | 8    | 1 | seq |
| .....auCgaucgagagcucca.....    | 1    | 1 | seq |
| .....auggaaucgagagUucca.....   | 4    | 1 | seq |
| .....auggaaucgGgagcucca.....   | 13   | 1 | seq |
| .....auggaaucgagagcuccC.....   | 50   | 1 | seq |
| .....auggaaucUagagcucca.....   | 5    | 1 | seq |
| .....Nuggaaucgagagcucca.....   | 10   | 1 | seq |
| .....auggaaucgCgagcucca.....   | 1    | 1 | seq |
| .....auggaaucgagagGucca.....   | 1    | 1 | seq |
| .....auggaaucCagagcucca.....   | 1    | 1 | seq |
| .....auggaaucgagagcCcca.....   | 18   | 1 | seq |
| .....auggaaucgUgagcucca.....   | 2    | 1 | seq |
| .....auggaaucgaAagcucca.....   | 2    | 1 | seq |
| .....auggUaucgagagcucca.....   | 2    | 1 | seq |
| .....auggaaucgagagcuccU.....   | 39   | 1 | seq |
| .....Guggaaucgagagcucca.....   | 22   | 1 | seq |
| .....auggaaucgagagcucGa.....   | 1    | 1 | seq |
| .....aAggaaucgagagcucca.....   | 5    | 1 | seq |
| .....auggaaucgagagcucGca.....  | 4    | 1 | seq |
| .....auggaaucgagaUcucca.....   | 1    | 1 | seq |
| .....auggaaucgagGgcucca.....   | 9    | 1 | seq |
| .....auggaaucgagagcucAa.....   | 1    | 1 | seq |
| .....auggaaucgagagcuccG.....   | 185  | 1 | seq |
| .....auggaaucgagagcAcca.....   | 13   | 1 | seq |
| .....augUaaucgagagcucca.....   | 3    | 1 | seq |
| .....auggaaucgaCagcucca.....   | 2    | 1 | seq |
| .....auggaaucgagagcuUca.....   | 3    | 1 | seq |
| .....auggaaucgagagcuccaG.....  | 12   | 1 | seq |
| .....auggaaucgagagcuccaU.....  | 3    | 1 | seq |
| .....auggaaucgagagcuccCc.....  | 1    | 1 | seq |
| .....auggaaucgagagcuccacG..... | 1    | 1 | seq |



## Star

## Mature

gaggcugaugcucucucaaagagggcccuuggcgaggaaaucggcagacucucgaucuccauguugaccaauggaauccgagagcuccaccuccuuuacuguguuu

|                                  |       |   |     |
|----------------------------------|-------|---|-----|
| .....auggaauccgagagcuccaGc.....  | 1     | 1 | seq |
| .....auggaauccgagagcuccacA.....  | 2     | 1 | seq |
| .....auggaauccgagagcuccacc.....  | 1     | 0 | seq |
| .....auggaauccgagagcuccaUc.....  | 1     | 1 | seq |
| .....auggaauccgagagcuccGcc.....  | 1     | 1 | seq |
| .....auggaauccgagagcuccaAc.....  | 1     | 1 | seq |
| .....auggaauccgagagcuccaAcu..... | 3     | 1 | seq |
| .....auggaauccgagagcuccaccA..... | 1     | 1 | seq |
| .....uggaauccgagaUcucca.....     | 3     | 1 | seq |
| .....uggaauccgagagcAcca.....     | 99    | 1 | seq |
| .....uggaauccgagagcucca.....     | 56    | 1 | seq |
| .....uggaauccgagagcuccGa.....    | 6     | 1 | seq |
| .....uggaauccgagagcuccC.....     | 363   | 1 | seq |
| .....uggaauccgagagcucca.....     | 18    | 1 | seq |
| .....uggaauccgagagcucca.....     | 2     | 1 | seq |
| .....Gggaauccgagagcucca.....     | 45    | 1 | seq |
| .....uggaauccgagagcucca.....     | 20    | 1 | seq |
| .....uggaauccgagagcucca.....     | 32    | 1 | seq |
| .....uggaauccgagagcucca.....     | 4     | 1 | seq |
| .....uGgaauccgagagcucca.....     | 2     | 1 | seq |
| .....uUgaauccgagagcucca.....     | 8     | 1 | seq |
| .....uggaauccgagagcucca.....     | 87    | 1 | seq |
| .....uggaauccgagagcucca.....     | 11    | 1 | seq |
| .....uggaauccgagagcucca.....     | 13    | 1 | seq |
| .....uggaUccgagagcucca.....      | 3     | 1 | seq |
| .....uggaauccgagagcucca.....     | 16    | 1 | seq |
| .....uggaauccgagagcucca.....     | 8     | 1 | seq |
| .....uggaauccgagagcucca.....     | 2     | 1 | seq |
| .....uggaauccgagagcucca.....     | 33    | 1 | seq |
| .....uggaauccgagagcucca.....     | 10    | 1 | seq |
| .....uggaauccgagagcucca.....     | 145   | 1 | seq |
| .....uggaUccgagagcucca.....      | 100   | 1 | seq |
| .....ugAauccgagagcucca.....      | 11    | 1 | seq |
| .....ugCauccgagagcucca.....      | 6     | 1 | seq |
| .....uggaauccgagagcucca.....     | 3     | 1 | seq |
| .....Aggaauccgagagcucca.....     | 37    | 1 | seq |
| .....uggaauccgagagcucca.....     | 124   | 1 | seq |
| .....uggaauccgagagcucca.....     | 20    | 1 | seq |
| .....ugUauccgagagcucca.....      | 11    | 1 | seq |
| .....uAgaauccgagagcucca.....     | 29    | 1 | seq |
| .....uggaauccgagagcucca.....     | 48    | 1 | seq |
| .....uggaauccgagagcucca.....     | 19    | 1 | seq |
| .....uggaauccgagagcucca.....     | 5     | 1 | seq |
| .....Nggaauccgagagcucca.....     | 40    | 1 | seq |
| .....uggCauccgagagcucca.....     | 5     | 1 | seq |
| .....uggaauccgagagcucca.....     | 32844 | 0 | seq |
| .....uggaauccgagagcucca.....     | 23    | 1 | seq |
| .....uggaauccgagagcucca.....     | 307   | 1 | seq |
| .....uggaauccgagagcucca.....     | 2     | 1 | seq |
| .....uggaauccgagagcucca.....     | 142   | 1 | seq |
| .....uggaauccgagagcucca.....     | 1370  | 1 | seq |
| .....uggaauccgagagcucca.....     | 3     | 1 | seq |
| .....uggaauGgagagcucca.....      | 3     | 1 | seq |
| .....uggaauccgagagcucca.....     | 50    | 1 | seq |
| .....uggaauccgagagcucca.....     | 3     | 0 | seq |
| .....uggaauccgagagcucca.....     | 12    | 1 | seq |
| .....uggaauccgagagcucca.....     | 29    | 1 | seq |
| .....uggaauccgagagcucca.....     | 5     | 1 | seq |
| .....uggaauccgagagcucca.....     | 1     | 1 | seq |
| .....uggaauccgagagcucca.....     | 4     | 1 | seq |
| .....uggaauccgagagcucca.....     | 4     | 0 | seq |
| .....uggaauccgagagcucca.....     | 1     | 1 | seq |
| .....uggaauccgagagcucca.....     | 3     | 1 | seq |
| .....uggaauccgagagcucca.....     | 2     | 1 | seq |
| .....uggaauccgagagcucca.....     | 2     | 1 | seq |
| .....uggaauccgagagcucca.....     | 9     | 1 | seq |
| .....uggaauccgagagcucca.....     | 1     | 1 | seq |
| .....ggaauccgagagcucca.....      | 11    | 1 | seq |
| .....ggaauccgagagcucca.....      | 1     | 1 | seq |
| .....ggaauccgagagcucca.....      | 1     | 1 | seq |

# Star

# Mature

|                                             |                          |               |                                |     |  |  |
|---------------------------------------------|--------------------------|---------------|--------------------------------|-----|--|--|
| gaggcugaugcucucucaaagagggcccuuggcgaggaaaucg | gcagacucucgaucuaaccaug   | uugacaauggaau | cgagagcuccaccuccacuuuacuguguuu |     |  |  |
| .....                                       | ggaaucgagagcuccacGu..... | 1             | 1                              | seq |  |  |
| .....                                       | ggaaucgagagcuccacAu..... | 1             | 1                              | seq |  |  |
| .....                                       | ggaaucgagagcuccaAcu..... | 1             | 1                              | seq |  |  |
| .....                                       | gaaucgagagcuccacA.....   | 1             | 1                              | seq |  |  |
| .....                                       | gaaucgagagcuccUcc.....   | 1             | 1                              | seq |  |  |
| .....                                       | gaaucgagagcuccaAc.....   | 4             | 1                              | seq |  |  |
| .....                                       | gaaucgagagcuccaGc.....   | 2             | 1                              | seq |  |  |
| .....                                       | gaaucgagagcuccaAcu.....  | 1             | 1                              | seq |  |  |
| .....                                       | gaaucgagagcuccaccA.....  | 3             | 1                              | seq |  |  |
| .....                                       | aaucgagagcuccaccu.....   | 1             | 0                              | seq |  |  |
| .....                                       | aaucgagagcuccaGcu.....   | 1             | 1                              | seq |  |  |
| .....                                       | aaucgagagcuccaAcuc.....  | 1             | 1                              | seq |  |  |
| .....                                       | aucgagagcuccaccCcca..... | 1             | 1                              | seq |  |  |

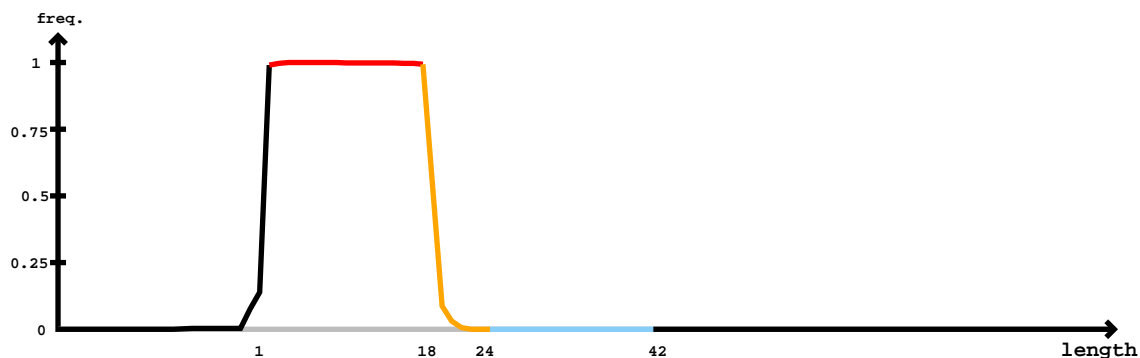[illegible]

**Mature**

Star

uagcgaaggucuuuuggggucuggggccacgaugguuagaaaacacaucgugggcuguaaauaccgcugcuacuguuagauggaaucagcagcuguggaggaggaggagg

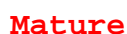

|    |                                                                                                                                           |              |
|----|-------------------------------------------------------------------------------------------------------------------------------------------|--------------|
| 5' | agaguucucgguuuuuucagaggguucaaaa <u>a</u> auggagauaucgguaaca <u>c</u> cccuuuuugcaggggugg <u>u</u> uguuguguaucucuguuuuuauugguugcaucucugauau | -3'      exp |
|    | .....(((((((.(((((((((((((((((((.(((.(.(((((.))))).)))).).)))..)))))))).)....)))))))).... reads      mm      sample                       |              |
|    | .....gguguuguguaucuuu..... 1      1      seq                                                                                              |              |
|    | .....Auuguuguguaucucuguuu..... 1      1      seq                                                                                          |              |
|    | .....uuguuguguaucucuguuu..... 2      0      seq                                                                                           |              |
|    | .....uuguuguguaucucuguuu..... 6      0      seq                                                                                           |              |
|    | .....uguuguguaucucuguuu..... 1      0      seq                                                                                            |              |
|    | .....guuguguaucucuguuu..... 2      0      seq                                                                                             |              |
|    | .....guuguguaucucuguuu..... 5      0      seq                                                                                             |              |
|    | .....uuguguaucucuguuu..... 1      0      seq                                                                                              |              |
|    | .....uuguguaucucuguuuuGu..... 1      1      seq                                                                                           |              |
|    | .....guaAcucuguuuuuauug..... 1      1      seq                                                                                            |              |

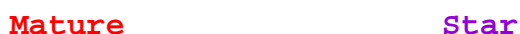

## Mature

## Star

caaguuuuugaacgcauuuuaaugacucucgggcaacagauaucucaacucucucacgaugugugugugugugugugugauuggaucuagcucgugugauugu

|                                        |      |   |     |
|----------------------------------------|------|---|-----|
| .....Guaugacucucgggcaacagaua.....      | 1    | 1 | seq |
| .....uuaugacucucgggcaacGgaua.....      | 1    | 1 | seq |
| .....Naaugacucucgggcaac.....           | 8    | 1 | seq |
| .....uaaugacuGucgggcaac.....           | 1    | 1 | seq |
| .....uaaugacucucgggcaGc.....           | 1    | 1 | seq |
| .....Caaugacucucgggcaac.....           | 5    | 1 | seq |
| .....uaaugacucucgggcaac.....           | 5    | 0 | seq |
| .....Gaaugacucucgggcaac.....           | 48   | 1 | seq |
| .....uaaugacucucgggcaaaU.....          | 1    | 1 | seq |
| .....uCaugacucucgggcaac.....           | 1    | 1 | seq |
| .....uaaugacucucgggcaacG.....          | 17   | 1 | seq |
| .....Aaaugacucucgggcaaca.....          | 1380 | 1 | seq |
| .....Naaugacucucgggcaaca.....          | 3    | 1 | seq |
| .....Caaugacucucgggcaaca.....          | 6    | 1 | seq |
| .....Gaaugacucucgggcaaca.....          | 13   | 1 | seq |
| .....Aaaugacucucgggcaacag.....         | 62   | 1 | seq |
| .....uaaugacucucgggcaacCg.....         | 1    | 1 | seq |
| .....uaaugacucucgggcaacGg.....         | 6    | 1 | seq |
| .....uaaugacucucgggcaacGga.....        | 35   | 1 | seq |
| .....Aaaugacucucgggcaacaga.....        | 26   | 1 | seq |
| .....Aaaugacucucgggcaacagau.....       | 1    | 1 | seq |
| .....uaaugacucucgggcaacGgau.....       | 1    | 1 | seq |
| .....uaaugacucucgggcaacGgaua.....      | 21   | 1 | seq |
| .....Aaaugacucucgggcaacagaua.....      | 19   | 1 | seq |
| .....Aaaugacucucgggcaacagauauc.....    | 8    | 1 | seq |
| .....uaaugacucucgggcaacGgauauc.....    | 7    | 1 | seq |
| .....uaaugacucucgggcaacGgauaucu.....   | 3    | 1 | seq |
| .....Aaaugacucucgggcaacagauaucu.....   | 2    | 1 | seq |
| .....Aaaugacucucgggcaacagauaucuc.....  | 2    | 1 | seq |
| .....uaaugacucucgggcaacGgauaucuc.....  | 1    | 1 | seq |
| .....uaaugacucucgggcaacGgauaucuca..... | 1    | 1 | seq |
| .....aaUacucucgggcaaca.....            | 3    | 1 | seq |
| .....Gaugacucucgggcaaca.....           | 29   | 1 | seq |
| .....aaugacucAcgggcaaca.....           | 3    | 1 | seq |
| .....aaugacucucgggcaUca.....           | 1    | 1 | seq |
| .....aUugacucucgggcaaca.....           | 2    | 1 | seq |
| .....aaugacucucgggcUaca.....           | 3    | 1 | seq |
| .....aaugacucucgggcaGca.....           | 20   | 1 | seq |
| .....aaugacucucgggUaaca.....           | 2    | 1 | seq |
| .....aaugacucucgggcCaca.....           | 2    | 1 | seq |
| .....aaGgacucucgggcaaca.....           | 2    | 1 | seq |
| .....aaugacCucgggcaaca.....            | 15   | 1 | seq |
| .....aaugUcucucgggcaaca.....           | 5    | 1 | seq |
| .....aaugacucucgggcaCca.....           | 14   | 1 | seq |
| .....aaugacucucgggcaaca.....           | 5290 | 0 | seq |
| .....aaugaUucucgggcaaca.....           | 4    | 1 | seq |
| .....aaCgacucucgggcaaca.....           | 17   | 1 | seq |
| .....Uaugacucucgggcaaca.....           | 5    | 1 | seq |
| .....Caugacucucgggcaaca.....           | 4    | 1 | seq |
| .....aaugacucucgggcaacU.....           | 810  | 1 | seq |
| .....aaugacucCcggaaca.....             | 13   | 1 | seq |
| .....aaAgacucucgggcaaca.....           | 8    | 1 | seq |
| .....aaugGcucucgggcaaca.....           | 12   | 1 | seq |
| .....aaugacucucgggcaaAa.....           | 1    | 1 | seq |
| .....aaUAcucucgggcaaca.....            | 2    | 1 | seq |
| .....aaugacucucgggAaaca.....           | 1    | 1 | seq |
| .....aaugacucGcggaaca.....             | 2    | 1 | seq |
| .....aaugacucucgggcGaca.....           | 19   | 1 | seq |
| .....aaugacucucgggcaaGa.....           | 2    | 1 | seq |
| .....aaugacucucgggcaaUa.....           | 4    | 1 | seq |
| .....aaugacucucgggGaaca.....           | 5    | 1 | seq |
| .....aaugacucucgggcaacC.....           | 354  | 1 | seq |
| .....Naugacucucgggcaaca.....           | 11   | 1 | seq |
| .....aaugacuUucgggaaca.....            | 3    | 1 | seq |
| .....aGugacucucgggcaaca.....           | 17   | 1 | seq |
| .....aaugaUucucgggcaacag.....          | 1    | 1 | seq |
| .....Gaugacucucgggcaacag.....          | 1    | 1 | seq |
| .....aaugacucucgggcaUcag.....          | 1    | 1 | seq |
| .....aaugacucucgggcaacaC.....          | 1    | 1 | seq |
| .....aaugacucucgggcaGcag.....          | 2    | 1 | seq |

## Mature

## Star

caaguuuuugaacgcauuuuaaugacucucgggcaacagauaucuacacucucucacgaugugugugugugugugugugauuggaucuagcucgugugauugu

|                                         |     |   |     |
|-----------------------------------------|-----|---|-----|
| .....aaugacucucgggcaacaA.....           | 3   | 1 | seq |
| .....aaugacucucgggGacag.....            | 4   | 1 | seq |
| .....aaugacucucgggcaacUg.....           | 21  | 1 | seq |
| .....aaugacucCcgggcaacag.....           | 2   | 1 | seq |
| .....aaugacucucgggcaacag.....           | 255 | 0 | seq |
| .....aaugacucUgggcaacag.....            | 1   | 1 | seq |
| .....aaugacucucgggcaacCg.....           | 48  | 1 | seq |
| .....aaugacucucgUcaacag.....            | 1   | 1 | seq |
| .....aaAgacucucgggcaacag.....           | 1   | 1 | seq |
| .....aaugGcucucgggcaacag.....           | 2   | 1 | seq |
| .....aaugacCcucgggcaacag.....           | 1   | 1 | seq |
| .....aaugacucucgggcaacUga.....          | 17  | 1 | seq |
| .....aaugacucucgggcaacaga.....          | 100 | 0 | seq |
| .....aaugacucucgggcaacCga.....          | 11  | 1 | seq |
| .....aaugacucucgggcaacagG.....          | 1   | 1 | seq |
| .....aaugacucucgggcaacagU.....          | 2   | 1 | seq |
| .....Uaugacucucgggcaacaga.....          | 1   | 1 | seq |
| .....aaugacucucgggcaacaCa.....          | 1   | 1 | seq |
| .....aaugacucucgggcaGcaga.....          | 1   | 1 | seq |
| .....aaugacucucgggcaacagau.....         | 4   | 0 | seq |
| .....aaugacucucgggcaacagaC.....         | 1   | 1 | seq |
| .....aaugacucucgggcaacaUau.....         | 1   | 1 | seq |
| .....aaugacucucgggcaacUgau.....         | 1   | 1 | seq |
| .....aaugacucucgggcaacUgaa.....         | 16  | 1 | seq |
| .....aaugacucucgggcaacagaua.....        | 92  | 0 | seq |
| .....aaugGcucucgggcaacagaua.....        | 1   | 1 | seq |
| .....aaugacucucgggcaacagGua.....        | 2   | 1 | seq |
| .....aGugacucucgggcaacagaua.....        | 1   | 1 | seq |
| .....aaugacucucgggcaacagauU.....        | 1   | 1 | seq |
| .....aaugacucucgggcaacCga.....          | 6   | 1 | seq |
| .....aaugacucucgggcaacagauau.....       | 1   | 0 | seq |
| .....aaugacucucgggcaacUgauau.....       | 1   | 1 | seq |
| .....aaugacucucgggcaacUgauauc.....      | 7   | 1 | seq |
| .....aaugacucucgggcaacagauaCc.....      | 1   | 1 | seq |
| .....aaugacucucgggcaacagauauc.....      | 27  | 0 | seq |
| .....aaugacucucgggcaacUgauaucu.....     | 2   | 1 | seq |
| .....aaugacucucgggcaacagauaucC.....     | 2   | 1 | seq |
| .....aGugacucucgggcaacagauaucu.....     | 1   | 1 | seq |
| .....aaugacucucgggcaacagauaucu.....     | 11  | 0 | seq |
| .....aaugacucucgggcaacCga.....          | 1   | 1 | seq |
| .....aaugacucucgggcaacagauaucuc.....    | 6   | 0 | seq |
| .....aaugacucucgggcaacagauaucuca.....   | 2   | 0 | seq |
| .....aaugacucucgggcaacagauaucucG.....   | 15  | 1 | seq |
| .....aaugacucucgggcaacagauaucucC.....   | 1   | 1 | seq |
| .....aaugacucucgggcaacagauaucucGac..... | 1   | 1 | seq |
| .....aaugacucucgggcaacagauaucucaGc..... | 2   | 1 | seq |
| .....augacucucgggGacag.....             | 1   | 1 | seq |
| .....augacucAcgggcaacag.....            | 2   | 1 | seq |
| .....augacucucgggcaaAag.....            | 1   | 1 | seq |
| .....aCgacucucgggcaacag.....            | 3   | 1 | seq |
| .....Nugacucucgggcaacag.....            | 1   | 1 | seq |
| .....augacAcucgggcaacag.....            | 1   | 1 | seq |
| .....augacucucgggcaacaU.....            | 1   | 1 | seq |
| .....augacucucgggcaacaA.....            | 13  | 1 | seq |
| .....augacCcucgggcaacag.....            | 3   | 1 | seq |
| .....augacucucgggcaGcag.....            | 1   | 1 | seq |
| .....augacucucgggcaacag.....            | 554 | 0 | seq |
| .....augacucucgggcaacUg.....            | 44  | 1 | seq |
| .....augacucucgggcaacCg.....            | 109 | 1 | seq |
| .....auUacucucgggcaacag.....            | 1   | 1 | seq |
| .....augGcucucgggcaacag.....            | 3   | 1 | seq |
| .....augacucucgggcaUcag.....            | 2   | 1 | seq |
| .....augacucuAgggcaacag.....            | 1   | 1 | seq |
| .....Gugacucucgggcaacag.....            | 3   | 1 | seq |
| .....augUcucucgggcaacag.....            | 1   | 1 | seq |
| .....augacucucgggcaacaC.....            | 4   | 1 | seq |
| .....augacucCcgggcaacag.....            | 1   | 1 | seq |
| .....augacucucgggcaacagG.....           | 4   | 1 | seq |
| .....aCgacucucgggcaacaga.....           | 1   | 1 | seq |
| .....augacucucgggcaacaAa.....           | 1   | 1 | seq |



## Mature

## Star

caaguuuuugaacgcauuuuauagacucucgggcaacagauaucucaacucucucacgaugugugugugugugugugugauuggaucucgucgugugauugu

|                                        |     |   |     |
|----------------------------------------|-----|---|-----|
| .....augacucucgggaUcaga.....           | 1   | 1 | seq |
| .....augacGcucgggcaacaga.....          | 1   | 1 | seq |
| .....augacucucgggcaGcaga.....          | 1   | 1 | seq |
| .....augacucucgggcaacCga.....          | 18  | 1 | seq |
| .....Gugacucucgggcaacaga.....          | 1   | 1 | seq |
| .....augacucucgggcaacagU.....          | 3   | 1 | seq |
| .....aAgacucucgggcaacaga.....          | 1   | 1 | seq |
| .....augacucucgggcaacaga.....          | 184 | 0 | seq |
| .....augacucucgggcaacUga.....          | 37  | 1 | seq |
| .....augacucucgggcaacCgau.....         | 2   | 1 | seq |
| .....augacucucgggcaGcagau.....         | 1   | 1 | seq |
| .....augacucucgggcaacagaC.....         | 1   | 1 | seq |
| .....augacucucgggcaacUgau.....         | 3   | 1 | seq |
| .....augacucucgggcaacaUau.....         | 5   | 1 | seq |
| .....augacucucgggcaacagau.....         | 21  | 0 | seq |
| .....augacCucgggcaacagaua.....         | 1   | 1 | seq |
| .....augacucucgggcaacagauU.....        | 6   | 1 | seq |
| .....augacucucgggcaacUgaa.....         | 29  | 1 | seq |
| .....augacucucgggcaacagaCa.....        | 6   | 1 | seq |
| .....augacucucgggUacagaua.....         | 1   | 1 | seq |
| .....augacucucgggcaacCgaua.....        | 13  | 1 | seq |
| .....augacucucgggcaacagaAa.....        | 1   | 1 | seq |
| .....augacucucgggcaacagaua.....        | 149 | 0 | seq |
| .....augacucucgggcaacagauC.....        | 2   | 1 | seq |
| .....augacucucgggcaacagauG.....        | 1   | 1 | seq |
| .....augacucucgCcaacagaua.....         | 1   | 1 | seq |
| .....augacucucgggcaacagGua.....        | 2   | 1 | seq |
| .....augacucucgggGacagaua.....         | 1   | 1 | seq |
| .....augacucucgggcaacagauau.....       | 3   | 0 | seq |
| .....augacucucgggcaacUgauau.....       | 1   | 1 | seq |
| .....augacucucgggcaacagauaC.....       | 1   | 1 | seq |
| .....augacucucgggcaacCgauau.....       | 1   | 1 | seq |
| .....augacucucgggcaacagauaG.....       | 1   | 1 | seq |
| .....augacucucgggcaacagauauU.....      | 1   | 1 | seq |
| .....augacucucgggcaacCgauauc.....      | 5   | 1 | seq |
| .....augGcucucgggcaacagauauc.....      | 1   | 1 | seq |
| .....augacucucgggAaacagauauc.....      | 1   | 1 | seq |
| .....augacucucgggcaacagauauc.....      | 69  | 0 | seq |
| .....augacucucgggcaacagauauA.....      | 1   | 1 | seq |
| .....augacucucgggcaacagauaCc.....      | 1   | 1 | seq |
| .....augacucucgggcaacagGuauc.....      | 1   | 1 | seq |
| .....Nugacucucgggcaacagauauc.....      | 1   | 1 | seq |
| .....augacucucgggcaacUgauauc.....      | 18  | 1 | seq |
| .....augacucAcgggcaacagauauc.....      | 1   | 1 | seq |
| .....augacuUucgggcaacagauauc.....      | 1   | 1 | seq |
| .....augacucucgggcaGcagauauc.....      | 1   | 1 | seq |
| .....augacucucgggcaacUgauaucu.....     | 4   | 1 | seq |
| .....augacucucgggcaacagauaucC.....     | 2   | 1 | seq |
| .....augacucucgggcaacagauaucG.....     | 1   | 1 | seq |
| .....augacucucgggcaacagauaucu.....     | 6   | 0 | seq |
| .....augacucucgggcaacagauaucA.....     | 1   | 1 | seq |
| .....augacucCcgggcaacagauaucuc.....    | 1   | 1 | seq |
| .....augacucucgggcaacagauaucuc.....    | 9   | 0 | seq |
| .....augacucucgggcaacUgauaucuc.....    | 2   | 1 | seq |
| .....augacucucgggcaacCgauaucuc.....    | 1   | 1 | seq |
| .....augacucucgggcaacagauaucucG.....   | 30  | 1 | seq |
| .....augacucucgggcaacagauaucuca.....   | 1   | 0 | seq |
| .....augacucucgggcaacGgauaucucaaa..... | 3   | 1 | seq |
| .....augacucucgggcaacGgauaucucaac..... | 2   | 1 | seq |
| .....ugacucucgggcaacCga.....           | 8   | 1 | seq |
| .....ugacucucgggcaacagG.....           | 3   | 1 | seq |
| .....ugacucucgggcaacUga.....           | 15  | 1 | seq |
| .....Cgacucucgggcaacaga.....           | 1   | 1 | seq |
| .....ugacucucgggcaacagC.....           | 1   | 1 | seq |
| .....ugacucucgggGacaga.....            | 1   | 1 | seq |
| .....ugacucucgggcaacaga.....           | 73  | 0 | seq |
| .....ugacucucgggcaacagau.....          | 18  | 0 | seq |
| .....ugacucCcgggcaacagau.....          | 1   | 1 | seq |
| .....ugacucucgggcaacCgau.....          | 1   | 1 | seq |
| .....ugacucucgggcaacUgau.....          | 5   | 1 | seq |

## Mature

## Star

caaguuuuugaacgcauuuuauugacucucgggcaacagauaucucaacucucucacgaugugugugugugugugugugauuggaucuagcucgugugauugu

|                                       |    |   |     |
|---------------------------------------|----|---|-----|
| .....ugacCucucgggcaacagaua.....       | 1  | 1 | seq |
| .....ugacucucgggcaGcagaua.....        | 1  | 1 | seq |
| .....ugacucucgggcaacagaua.....        | 56 | 0 | seq |
| .....ugacucucgggcaacagaCa.....        | 1  | 1 | seq |
| .....ugacucucgggcaacCgaua.....        | 5  | 1 | seq |
| .....ugacucucgggcaacagauU.....        | 2  | 1 | seq |
| .....ugacucucgggcaacUgaua.....        | 9  | 1 | seq |
| .....ugacucucgggcaacUgauau.....       | 1  | 1 | seq |
| .....ugacucucgggcaacagauau.....       | 2  | 0 | seq |
| .....ugacucucgggcaacCgauauc.....      | 2  | 1 | seq |
| .....ugacCucucgggcaacagauauc.....     | 1  | 1 | seq |
| .....ugacucucgggcaacagauauc.....      | 25 | 0 | seq |
| .....ugacucucgggcaacagauauU.....      | 2  | 1 | seq |
| .....ugacucCcgggcaacagauauc.....      | 1  | 1 | seq |
| .....ugacucucgggcaacUgauauc.....      | 5  | 1 | seq |
| .....ugacucucgggcaacUgauaucu.....     | 11 | 1 | seq |
| .....ugacucucgggcaacagauaucu.....     | 32 | 0 | seq |
| .....ugacucucgggcaacagauaucG.....     | 1  | 1 | seq |
| .....ugacucucgggcaacagauaucC.....     | 10 | 1 | seq |
| .....ugacucucgggcaacagauaucA.....     | 3  | 1 | seq |
| .....ugacucucgggcaacCgauaucu.....     | 3  | 1 | seq |
| .....uAacucucgggcaacagauaucu.....     | 1  | 1 | seq |
| .....ugacucucgggcaacagauaucuc.....    | 9  | 0 | seq |
| .....ugacucucgggcaacCgauaucuc.....    | 1  | 1 | seq |
| .....ugacucucgggcaacUgauaucuc.....    | 2  | 1 | seq |
| .....ugacucucgggcaacagauaucuca.....   | 3  | 0 | seq |
| .....ugacucucgggcaacagauaucucG.....   | 19 | 1 | seq |
| .....ugacucucgggcaacagauaucucGa.....  | 1  | 1 | seq |
| .....ugacucucgggcaacGgauauaucuca..... | 1  | 1 | seq |
| .....gacucucgggcaacUgau.....          | 4  | 1 | seq |
| .....gacucucgggcaacagau.....          | 4  | 0 | seq |
| .....gacucucgggcaacagCu.....          | 1  | 1 | seq |
| .....Nacucucgggcaacagau.....          | 1  | 1 | seq |
| .....gacucucgggcaacaUau.....          | 1  | 1 | seq |
| .....gacucucgggcaacCgau.....          | 2  | 1 | seq |
| .....gacucucgggcaacUgaua.....         | 12 | 1 | seq |
| .....gacucucgggcaacCgaua.....         | 6  | 1 | seq |
| .....gacucucgggcGacagaua.....         | 1  | 1 | seq |
| .....gacucucgggcaacagaCa.....         | 4  | 1 | seq |
| .....gacucuUgggcaacagaua.....         | 1  | 1 | seq |
| .....gacucucgggcaacagaua.....         | 50 | 0 | seq |
| .....gacucucgggUaacagaua.....         | 1  | 1 | seq |
| .....gacucucgggcaacagauU.....         | 2  | 1 | seq |
| .....gacucucgggcaacUgauau.....        | 1  | 1 | seq |
| .....gacucucgggcaacCgauau.....        | 1  | 1 | seq |
| .....gacucucgggcaacagauau.....        | 2  | 0 | seq |
| .....gacucucgggcaacUgauauc.....       | 2  | 1 | seq |
| .....gGcucucgggcaacagauauc.....       | 1  | 1 | seq |
| .....gacucucgggcaacCgauauc.....       | 1  | 1 | seq |
| .....gacucucgggcaacagauaCc.....       | 1  | 1 | seq |
| .....gacucucgggcaacagauauc.....       | 9  | 0 | seq |
| .....gacucucgggcaacagauaucC.....      | 1  | 1 | seq |
| .....gacucucgggcaacagauaucu.....      | 13 | 0 | seq |
| .....gacucucgggcaacUgauaucu.....      | 2  | 1 | seq |
| .....gacucucgggcaacagauaucuc.....     | 3  | 0 | seq |
| .....gacucucgggcaacagauaucGc.....     | 1  | 1 | seq |
| .....gacucucgggcaacCgauaucuc.....     | 1  | 1 | seq |
| .....gacucucgggcaacUgauaucuca.....    | 1  | 1 | seq |
| .....gacucucgggcaacCgauaucuca.....    | 1  | 1 | seq |
| .....gacucucgggcaacagauaucucU.....    | 1  | 1 | seq |
| .....gacucucgggcaacagauaucucG.....    | 24 | 1 | seq |
| .....gacucucgggcaacagauaucucGa.....   | 1  | 1 | seq |
| .....gacucucgggcaacGgauaucuca.....    | 2  | 1 | seq |
| .....gacucucgggcaacGgauaucucaac.....  | 1  | 1 | seq |
| .....acucucUgcaacagaua.....           | 1  | 1 | seq |
| .....acucucgggcaacUgaua.....          | 5  | 1 | seq |
| .....acucucgggcaacCgaua.....          | 1  | 1 | seq |
| .....acucucgggcaacagauauc.....        | 2  | 0 | seq |
| .....acucucgggcaacagauaucC.....       | 1  | 1 | seq |
| .....acucucgggcaacagauaucu.....       | 6  | 0 | seq |

Star

[illegible]

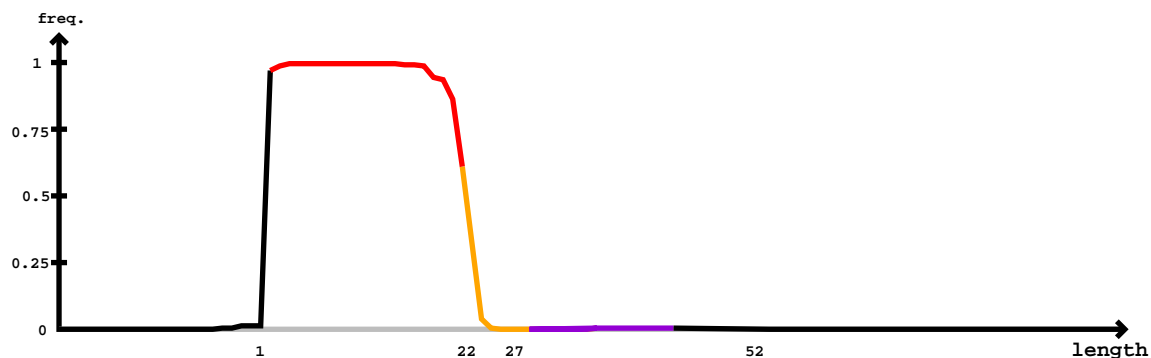

Star

| 5' -                                                                                                                | -3'   | obs |        |
|---------------------------------------------------------------------------------------------------------------------|-------|-----|--------|
|                                                                                                                     |       | exp |        |
|                                                                                                                     | reads | mm  | sample |
| ugcugcaccucuuuguugguuuugaauugugguugcugcaacaaugacuguuugucaauuguugggauucagacugcagcuggggaacgaaguuguugguugcuuuugcaacu   |       |     |        |
| ugcugcaccucuuuguugguuuugaauugugguugcugcaacaaugacuguuuguugcaauuguugggauucagacugcagcuggggaacgaaguuguugguugcuuuugcaacu |       |     |        |
| ((((( ((((((.....((( ((( ((((((.....)))))).))))..). ....))))))))) ((((((.....)))))).)))).....))....                 |       |     |        |
| .....ugguuuugaauugguugcugc.....                                                                                     | 1     | 0   | seq    |
| .....guuuugaauugguugc.....                                                                                          | 1     | 0   | seq    |
| .....guuuugaauugguugcugca.....                                                                                      | 1     | 0   | seq    |
| .....ugaauugguugcugca.....                                                                                          | 9     | 0   | seq    |
| .....ugaauugguugcugcaaa.....                                                                                        | 1     | 0   | seq    |
| .....ugaauugguugcugcaaac.....                                                                                       | 15    | 0   | seq    |
| .....ugaauugguugcugcaau.....                                                                                        | 1     | 1   | seq    |
| .....ugaauugguugcugcaaacG.....                                                                                      | 3     | 1   | seq    |
| .....ugaauugguugcugcaaca.....                                                                                       | 50    | 0   | seq    |
| .....ugaaCGugguugcugcaaca.....                                                                                      | 1     | 1   | seq    |
| .....ugGaugugguugcugcaaca.....                                                                                      | 1     | 1   | seq    |
| .....ugaauugguugcugcaacaU.....                                                                                      | 1     | 1   | seq    |
| .....ugaauugguugcCGcaacaa.....                                                                                      | 2     | 1   | seq    |
| .....ugaauugguugcugcaacaG.....                                                                                      | 1     | 1   | seq    |
| .....ugaauugguugcugcGacaa.....                                                                                      | 1     | 1   | seq    |
| .....ugaauuggCugcugcaacaa.....                                                                                      | 1     | 1   | seq    |
| .....ugaauugguugcugcaacaa.....                                                                                      | 119   | 0   | seq    |
| .....ugaauugguugcugcaacUa.....                                                                                      | 1     | 1   | seq    |
| .....ugaGugugguugcugcaacaa.....                                                                                     | 1     | 1   | seq    |
| .....ugaauugguugcugcaacaUu.....                                                                                     | 1     | 1   | seq    |
| .....ugaauugguugcugcaacaaC.....                                                                                     | 1     | 1   | seq    |
| .....ugaauugguugcugcaacaau.....                                                                                     | 4     | 0   | seq    |
| .....ugaauugguugcugcaacaauU.....                                                                                    | 8     | 1   | seq    |
| .....ugaauugguugcugcaacaauUa.....                                                                                   | 1     | 1   | seq    |
| .....gaauugguugcugcaa.....                                                                                          | 1     | 0   | seq    |
| .....gaauugguugcugcaaac.....                                                                                        | 1     | 0   | seq    |
| .....gaauugguugcugcaaca.....                                                                                        | 2     | 0   | seq    |
| .....aaugguugcugcaaca.....                                                                                          | 1     | 0   | seq    |
| .....Gaugguugcugcaaca.....                                                                                          | 1     | 1   | seq    |
| .....aauguuggUauucaga.....                                                                                          | 1     | 1   | seq    |

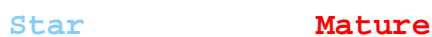[illegible]

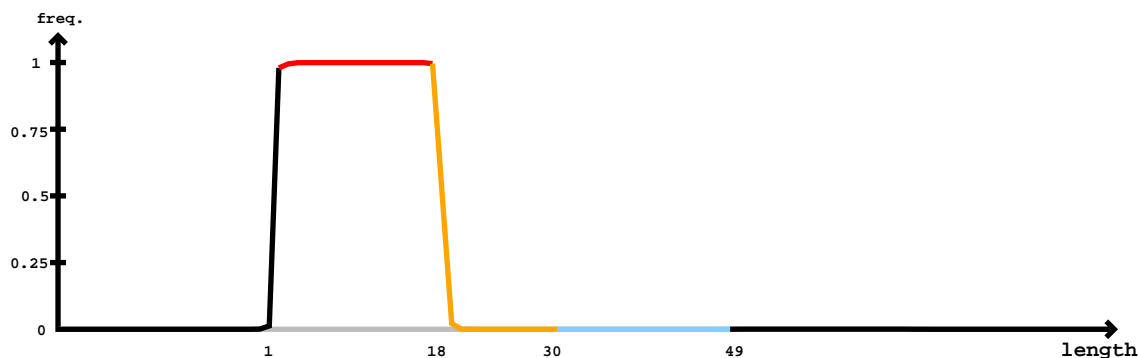

Star

[illegible]

Mature

Star

|                                                                                                                        |    |   |     |
|------------------------------------------------------------------------------------------------------------------------|----|---|-----|
| uccaaccuaacucagauuuuugagagguguagaa <u>uaggaagagcaca</u> uccaaccuaacucagauuuuugagagguguaggaa <u>uacg</u> aaauuccuuaaacc |    |   |     |
| .....ugagagguguagaauaga.....                                                                                           | 1  | 0 | seq |
| .....ugagagguguagaauaAa.....                                                                                           | 62 | 1 | seq |
| .....ugagagguguagaauagGg.....                                                                                          | 3  | 1 | seq |
| .....gagagguguagaauaAa.....                                                                                            | 28 | 1 | seq |
| .....gagagguguagaauaga.....                                                                                            | 1  | 0 | seq |
| .....gagguguagaauagaCa.....                                                                                            | 1  | 1 | seq |
| .....uuuuugaAagguguaggaa <u>uu</u> .....                                                                               | 1  | 1 | seq |
| .....Cuugagagguguaggaa.....                                                                                            | 1  | 1 | seq |
| .....uuugaAagguguaggaa.....                                                                                            | 1  | 1 | seq |

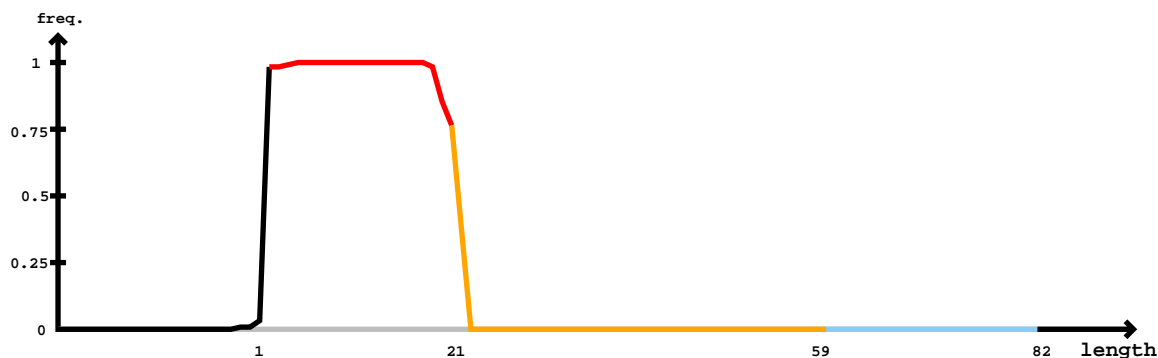

Star



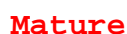[illegible]

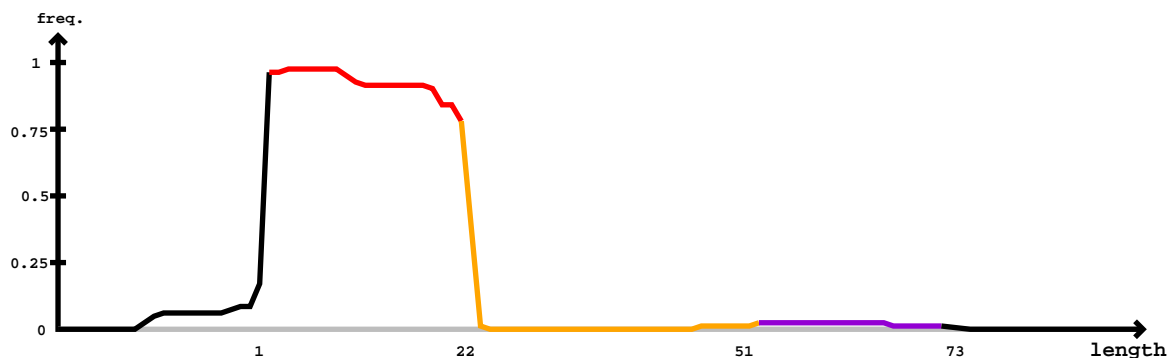

Star

[illegible]

[illegible]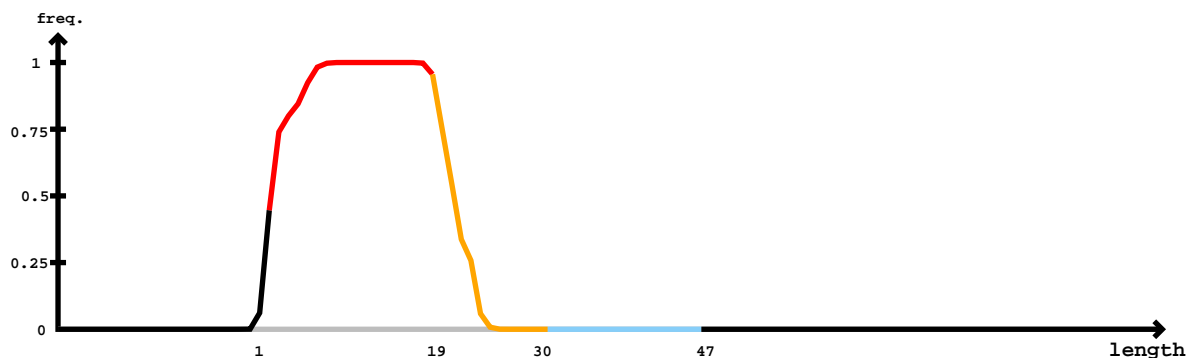

Star

[illegible]

## Mature

## Star

|                                                                                                                    |       |   |     |
|--------------------------------------------------------------------------------------------------------------------|-------|---|-----|
| ucuuaguuagcaugcucagggcuagaguaguacuggggaugggcgaccgcccagacaguccuaguguuuuacaugccuagacauuuuauaaacuuaguccaaauuuaucccaca |       |   |     |
| .....ggcuagaguaguacuggggaugggccc.....                                                                              | 113   | 0 | seq |
| .....ggcuagaguaguacuggggauggggG.....                                                                               | 23    | 1 | seq |
| .....ggcuagaguaguacuggggaugggCc.....                                                                               | 1     | 1 | seq |
| .....ggcuagaguaguacuggggaugggUc.....                                                                               | 1     | 1 | seq |
| .....ggcuagaguagGacuggggaugggccc.....                                                                              | 1     | 1 | seq |
| .....ggcuagaguaguacuggggauggggcg.....                                                                              | 8     | 0 | seq |
| .....ggUuagaguaguacuggggauggggcg.....                                                                              | 1     | 1 | seq |
| .....ggcuagaguaguacuggggauggggcA.....                                                                              | 1     | 1 | seq |
| .....ggcuagaguaguacuggggauggggGg.....                                                                              | 8     | 1 | seq |
| .....ggcuagGguaguacuggggauggggcg.....                                                                              | 1     | 1 | seq |
| .....gcuagaguaguacugggg.....                                                                                       | 3399  | 0 | seq |
| .....Ncuagaguaguacugggg.....                                                                                       | 2     | 1 | seq |
| .....gcuCgaguaguacugggg.....                                                                                       | 1     | 1 | seq |
| .....gcuagaguaguagGugggg.....                                                                                      | 1     | 1 | seq |
| .....gcuagaguCguacugggga.....                                                                                      | 3     | 1 | seq |
| .....gcuagaguaguagGuggga.....                                                                                      | 3     | 1 | seq |
| .....gcuagaguaguacugggga.....                                                                                      | 15937 | 0 | seq |
| .....gcuCgaguaguacugggga.....                                                                                      | 2     | 1 | seq |
| .....gNuagaguaguacugggga.....                                                                                      | 2     | 1 | seq |
| .....Ncuagaguaguacugggga.....                                                                                      | 24    | 1 | seq |
| .....Ncuagaguaguacuggggaug.....                                                                                    | 7     | 1 | seq |
| .....gcuagaguaguacuggggaug.....                                                                                    | 3648  | 0 | seq |
| .....gNuagaguaguacuggggaug.....                                                                                    | 2     | 1 | seq |
| .....gcuagaguCguacuggggaug.....                                                                                    | 1     | 1 | seq |
| .....Ncuagaguaguacuggggaug.....                                                                                    | 8     | 1 | seq |
| .....gcuagaguaguacuggggaug.....                                                                                    | 7467  | 0 | seq |
| .....Ncuagaguaguacuggggaugg.....                                                                                   | 1     | 1 | seq |
| .....gcuagaguaguacuggggaugg.....                                                                                   | 1676  | 0 | seq |
| .....Ncuagaguaguacuggggaugggg.....                                                                                 | 2     | 1 | seq |
| .....gcuagaguaguacuggggaugggg.....                                                                                 | 1812  | 0 | seq |
| .....gcuagaguaguacuggggaugAgc.....                                                                                 | 1     | 1 | seq |
| .....gcuagaguaguacuggggauggggc.....                                                                                | 166   | 0 | seq |
| .....gcuagaguaguacuggggauggggG.....                                                                                | 37    | 1 | seq |
| .....gcuagaguGguacuggggauggggc.....                                                                                | 1     | 1 | seq |
| .....Ucuagaguaguacuggggauggggc.....                                                                                | 1     | 1 | seq |
| .....gcuagagCaguacuggggauggggc.....                                                                                | 1     | 1 | seq |
| .....gcuagGguaguacuggggauggggc.....                                                                                | 15    | 1 | seq |
| .....gcuagaguaguacuggggauggggcU.....                                                                               | 5     | 1 | seq |
| .....gcuagaguaguacuggggauggggGg.....                                                                               | 10    | 1 | seq |
| .....gcuagGguaguacuggggauggggcg.....                                                                               | 2     | 1 | seq |
| .....gcuagaguaguacuggggauggggcg.....                                                                               | 21    | 0 | seq |
| .....gcuagaguaguacuggggaCggggcg.....                                                                               | 1     | 1 | seq |
| .....gcuagaguaguacuggggauggggcA.....                                                                               | 4     | 1 | seq |
| .....gcuagaguaguacuggggauggggcC.....                                                                               | 1     | 1 | seq |
| .....gcuagaguaguacuggggauggggGga.....                                                                              | 2     | 1 | seq |
| .....gcuagaguaguacuggggauggggcgUc.....                                                                             | 1     | 1 | seq |
| .....cuagaguCguacugggga.....                                                                                       | 1     | 1 | seq |
| .....Nuagaguaguacugggga.....                                                                                       | 17    | 1 | seq |
| .....cuagaguaguacugggga.....                                                                                       | 11182 | 0 | seq |
| .....cuagaguaguacuggggaug.....                                                                                     | 1705  | 0 | seq |
| .....Nuagaguaguacuggggaug.....                                                                                     | 1     | 1 | seq |
| .....Nuagaguaguacuggggaug.....                                                                                     | 14    | 1 | seq |
| .....cuagaguaguacuggggaug.....                                                                                     | 5911  | 0 | seq |
| .....cuagaguCguacuggggaug.....                                                                                     | 2     | 1 | seq |
| .....cuCgaguaguacuggggaug.....                                                                                     | 1     | 1 | seq |
| .....cuCgaguaguacuggggaugg.....                                                                                    | 1     | 1 | seq |
| .....Nuagaguaguacuggggaugg.....                                                                                    | 2     | 1 | seq |
| .....cuagaguaguacuggggaugg.....                                                                                    | 2280  | 0 | seq |
| .....cuagaguaguacuggggaugggg.....                                                                                  | 4071  | 0 | seq |
| .....Nuagaguaguacuggggaugggg.....                                                                                  | 5     | 1 | seq |
| .....cuCgaguaguacuggggaugggg.....                                                                                  | 2     | 1 | seq |
| .....cuagaguaguacuggggaugNg.....                                                                                   | 1     | 1 | seq |
| .....cuagaguAguacuggggauggggc.....                                                                                 | 1     | 1 | seq |
| .....cuagGguaguacuggggauggggc.....                                                                                 | 49    | 1 | seq |
| .....cuagagCaguacuggggauggggc.....                                                                                 | 4     | 1 | seq |
| .....cuuUaguaguacuggggauggggc.....                                                                                 | 1     | 1 | seq |
| .....cuagaguaguacuggggauggggG.....                                                                                 | 124   | 1 | seq |
| .....cuagaguaguacuggggaCggggc.....                                                                                 | 2     | 1 | seq |
| .....cuCgaguaguacuggggauggggc.....                                                                                 | 1     | 1 | seq |
| .....cuagaguUguacuggggauggggc.....                                                                                 | 1     | 1 | seq |

## Mature

## Star

ucuuaguuagcaugcucagcagcuagaguuagcuaggggacggccagacaguccuaguguuuacauGCCuagacauuuuaaaacuuaguccaauuuaucccccaca

|                                      |      |   |     |
|--------------------------------------|------|---|-----|
| .....cuagagAaguuacuggggaugggc.....   | 1    | 1 | seq |
| .....cuagaguGguacuuggggaugggc.....   | 3    | 1 | seq |
| .....Guagaguaguuacuggggaugggc.....   | 1    | 1 | seq |
| .....cuagaguaguuacuggggaugggc.....   | 639  | 0 | seq |
| .....cuagaAuuaguuacuggggaugggc.....  | 1    | 1 | seq |
| .....cuagaguaguuacugggGugggc.....    | 1    | 1 | seq |
| .....cuagaguaguuacCgggaugggc.....    | 3    | 1 | seq |
| .....cuagaguaguuGcuuggggaugggc.....  | 1    | 1 | seq |
| .....cuagaguaguuacuggggaugggCc.....  | 4    | 1 | seq |
| .....cuagaguaguuacuggggaugggUc.....  | 1    | 1 | seq |
| .....cuagaUuuaguuacuggggaugggc.....  | 1    | 1 | seq |
| .....cuagGguaguuacuggggaugggcg.....  | 3    | 1 | seq |
| .....cuagaguaguuacuggggaugggcU.....  | 3    | 1 | seq |
| .....Auuagaguaguuacuggggaugggcg..... | 1    | 1 | seq |
| .....cuagagCaguacuuggggaugggcg.....  | 1    | 1 | seq |
| .....cuagaguaguuacuggggaugggcC.....  | 1    | 1 | seq |
| .....cuagaguaguuacuggggaCgggcg.....  | 2    | 1 | seq |
| .....cuagaguaguuacuggggaugggGg.....  | 18   | 1 | seq |
| .....cuagaguaguuacuggggaugggcA.....  | 7    | 1 | seq |
| .....cuagaguaguuacuggggaugggcg.....  | 46   | 0 | seq |
| .....cuagaguaguuacuggggaugggCcg..... | 1    | 1 | seq |
| .....uCGaguaguuacuggggau.....        | 1    | 1 | seq |
| .....uagaguaguuacuggggau.....        | 1470 | 0 | seq |
| .....Nagaguaguuacuggggau.....        | 2    | 1 | seq |
| .....Nagaguaguuacuggggaug.....       | 1    | 1 | seq |
| .....uagaguaguuacuggggaug.....       | 1889 | 0 | seq |
| .....uagaguCguacuuggggaug.....       | 1    | 1 | seq |
| .....uCGaguaguuacuggggaug.....       | 1    | 1 | seq |
| .....uagaguaguuacuggggaugg.....      | 523  | 0 | seq |
| .....Nagaguaguuacuggggauggg.....     | 1    | 1 | seq |
| .....uagaguaguuacuggggauggg.....     | 1169 | 0 | seq |
| .....uUgaguaguuacuggggaugggc.....    | 1    | 1 | seq |
| .....uagaguaguuacugggGugggc.....     | 1    | 1 | seq |
| .....uagaguaguuacugggGugggc.....     | 1    | 1 | seq |
| .....uagGguaguuacuggggaugggc.....    | 16   | 1 | seq |
| .....uagaguaguuacuggggaugggG.....    | 56   | 1 | seq |
| .....uagaguaguuacuggggaugggc.....    | 201  | 0 | seq |
| .....uagaguaguuacCgggaugggc.....     | 1    | 1 | seq |
| .....uagaguaguuacuggggaCgggc.....    | 2    | 1 | seq |
| .....uagaguGguacuuggggaugggc.....    | 1    | 1 | seq |
| .....uagaguaguuacuggggaugggcA.....   | 2    | 1 | seq |
| .....uagaguaguuacuggggaugggCc.....   | 1    | 1 | seq |
| .....uagGguaguuacuggggaugggcg.....   | 1    | 1 | seq |
| .....uagaguaguuacuggggaugggGg.....   | 6    | 1 | seq |
| .....uagaguaguuacuggggaugggcU.....   | 2    | 1 | seq |
| .....uagaguaguuacuggggaugggcg.....   | 8    | 0 | seq |
| .....Ngaguaguuacuggggaug.....        | 3    | 1 | seq |
| .....agaguaguuacuggggaug.....        | 1946 | 0 | seq |
| .....Cgaguaguuacuggggaug.....        | 3    | 1 | seq |
| .....agaguaguuacuggggaugg.....       | 545  | 0 | seq |
| .....Ngaguaguuacuggggauggg.....      | 1    | 1 | seq |
| .....agaguaguuacuggggauggg.....      | 1297 | 0 | seq |
| .....agaguaguuacuggggaugggG.....     | 46   | 1 | seq |
| .....Ggaguaguuacuggggaugggc.....     | 2    | 1 | seq |
| .....agaguGguacuuggggaugggc.....     | 1    | 1 | seq |
| .....agaAuuaguuacuggggaugggc.....    | 1    | 1 | seq |
| .....agGguaguuacuggggaugggc.....     | 11   | 1 | seq |
| .....agaguaguuacuggggaCgggc.....     | 1    | 1 | seq |
| .....agagCaguacuuggggaugggc.....     | 1    | 1 | seq |
| .....agaguaguuacuggggaugggUc.....    | 1    | 1 | seq |
| .....agaguaguuacugggGugggc.....      | 1    | 1 | seq |
| .....agaguaguuGcuuggggaugggc.....    | 1    | 1 | seq |
| .....agaguaguuacAggggaugggc.....     | 1    | 1 | seq |
| .....agaguaguuacuggggaugggc.....     | 168  | 0 | seq |
| .....Ggaguaguuacuggggaugggcg.....    | 1    | 1 | seq |
| .....agaguaguuacuggggaugggcC.....    | 1    | 1 | seq |
| .....agaguaguuacuggggaugggGg.....    | 6    | 1 | seq |
| .....agGguaguuacuggggaugggcg.....    | 1    | 1 | seq |
| .....agaguaguuacuggggaugggcU.....    | 1    | 1 | seq |
| .....agaguaguuacuggggaugggcg.....    | 10   | 0 | seq |

## Mature

## Star

ucuuaguuagcaugcucagggcuagaguagucuggggaugggacgacccgacagacaguccuaguguuuuacaugccuagacauuuuauaaacuuaguccaaauuuaucccaca

|                                       |      |   |     |
|---------------------------------------|------|---|-----|
| .....agaguaguacuggggaugggacgC.....    | 1    | 1 | seq |
| .....Naguaguacuggggauggg.....         | 4    | 1 | seq |
| .....gaguaguacuggggauggg.....         | 1687 | 0 | seq |
| .....gaguaguacuggggauggg.....         | 4418 | 0 | seq |
| .....Naguaguacuggggauggg.....         | 7    | 1 | seq |
| .....gaguaguGcuggggaugggc.....        | 2    | 1 | seq |
| .....gaguaguacuggggaugggAc.....       | 3    | 1 | seq |
| .....gaguaguacCggggaugggc.....        | 2    | 1 | seq |
| .....gaguaguacuggggaugggc.....        | 641  | 0 | seq |
| .....gaguaguacugggGugggc.....         | 6    | 1 | seq |
| .....gaguaguacuggggaugggCc.....       | 4    | 1 | seq |
| .....gaguaguacuggggaugggc.....        | 3    | 1 | seq |
| .....gaguaguacuggggaugggG.....        | 148  | 1 | seq |
| .....gaguaguGuggggaugggc.....         | 1    | 1 | seq |
| .....gUguaguacuggggaugggc.....        | 1    | 1 | seq |
| .....gGguaguacuggggaugggc.....        | 10   | 1 | seq |
| .....gaguaguaUuggggaugggc.....        | 1    | 1 | seq |
| .....gaguaguacAggggaugggc.....        | 1    | 1 | seq |
| .....gaguaguacuggggaugggc.....        | 3    | 1 | seq |
| .....gaCuaguacuggggaugggc.....        | 1    | 1 | seq |
| .....gaguagGacuggggaugggc.....        | 1    | 1 | seq |
| .....gaguagAacuggggaugggc.....        | 1    | 1 | seq |
| .....gagCaguacuggggaugggc.....        | 2    | 1 | seq |
| .....gaguaguacuggggaugggcg.....       | 32   | 0 | seq |
| .....gaguaguacuggggaugggcU.....       | 3    | 1 | seq |
| .....gaguaguacuggggaugggAcg.....      | 1    | 1 | seq |
| .....gaguaguacuggggaugggCcgc.....     | 1    | 1 | seq |
| .....gaguaguacuggggaugggcg.....       | 2    | 1 | seq |
| .....gaguaguacuggggaugggcg.....       | 2    | 1 | seq |
| .....gaguaguacuggggaugggGg.....       | 28   | 1 | seq |
| .....gaguaguacuggggaugggG.....        | 11   | 1 | seq |
| .....gaguaguacuggggaugggCc.....       | 3    | 1 | seq |
| .....gaguaguacuggggaugggcg.....       | 1    | 1 | seq |
| .....gaguaguacuggggaugggcgG.....      | 2    | 1 | seq |
| .....gaguaguacuggggaugggcgU.....      | 1    | 1 | seq |
| .....gaguaguacuggggaugggGga.....      | 1    | 1 | seq |
| .....gaguaguacuggggaugggcgaccCcc..... | 1    | 1 | seq |
| .....aguaguacuggggauggg.....          | 4372 | 0 | seq |
| .....Nguaguacuggggauggg.....          | 6    | 1 | seq |
| .....Gguaguacuggggaugggc.....         | 5    | 1 | seq |
| .....aguaguacuggggaugggAgc.....       | 2    | 1 | seq |
| .....agCaguacuggggaugggc.....         | 1    | 1 | seq |
| .....aguaguacuggggaugggc.....         | 2    | 1 | seq |
| .....aLuaguacuggggaugggc.....         | 1    | 1 | seq |
| .....aguaguGcuggggaugggc.....         | 1    | 1 | seq |
| .....aguaguacugggGugggc.....          | 6    | 1 | seq |
| .....aguaguacAggggaugggc.....         | 1    | 1 | seq |
| .....aguaguacuggggaugggAc.....        | 1    | 1 | seq |
| .....aguaAuacuggggaugggc.....         | 1    | 1 | seq |
| .....aguaguacCggggaugggc.....         | 3    | 1 | seq |
| .....aguaguacuggggaugggCc.....        | 3    | 1 | seq |
| .....aguaguacuggggaugggc.....         | 1    | 1 | seq |
| .....aguaguacuggggaugggc.....         | 596  | 0 | seq |
| .....aguaguacuggggaugggc.....         | 1    | 1 | seq |
| .....aguaguacuggggaugggG.....         | 131  | 1 | seq |
| .....aguaguacuggggaugggc.....         | 1    | 1 | seq |
| .....aguaguacuggggaugggcg.....        | 27   | 0 | seq |
| .....aguaguacuggggaugggcU.....        | 2    | 1 | seq |
| .....aguaguacuggggaugggcg.....        | 1    | 1 | seq |
| .....aguaguacuggggaugggGg.....        | 20   | 1 | seq |
| .....aguaguacuggggaugggAcg.....       | 1    | 1 | seq |
| .....aguaguacuggggaugggcC.....        | 2    | 1 | seq |
| .....guUguaguacuggggaugggc.....       | 1    | 1 | seq |
| .....guaguacuggggaugggc.....          | 2    | 1 | seq |
| .....guaguacuggggaugggc.....          | 1    | 1 | seq |
| .....gCaguacuggggaugggc.....          | 4    | 1 | seq |
| .....guaguGcuggggaugggc.....          | 8    | 1 | seq |
| .....guaguacuggggaugggCc.....         | 2    | 1 | seq |
| .....Auaguacuggggaugggc.....          | 1    | 1 | seq |
| .....guaguacuggggaugggAc.....         | 2    | 1 | seq |

## Mature

## Star

ucuuaguuagcaugcucagggcuagaguagucugggaugggacgacccagacaguccuaguguuuuacaugccuagacauuuuauaaacuaguccaauuuaucccaca

|                                  |      |   |     |
|----------------------------------|------|---|-----|
| .....guaguacCgggaugggc.....      | 1    | 1 | seq |
| .....guaguacuUgggaugggc.....     | 1    | 1 | seq |
| .....guaguacuggggCugggc.....     | 1    | 1 | seq |
| .....guaguacuggggGugggc.....     | 4    | 1 | seq |
| .....guGuaguacuggggaugggc.....   | 5    | 1 | seq |
| .....guaguacGgggaugggc.....      | 1    | 1 | seq |
| .....guaguacuggggauggAc.....     | 3    | 1 | seq |
| .....guaguacuggggaugggc.....     | 1142 | 0 | seq |
| .....guaguacuggggaAgggc.....     | 2    | 1 | seq |
| .....guaguacuAggaugggc.....      | 1    | 1 | seq |
| .....Nuaguacuggggaugggc.....     | 2    | 1 | seq |
| .....guaguacugUgaugggc.....      | 1    | 1 | seq |
| .....Uuaguacuggggaugggc.....     | 1    | 1 | seq |
| .....guaguacuggggauggCcg.....    | 2    | 1 | seq |
| .....guaguacuggggaGgggcg.....    | 1    | 1 | seq |
| .....guaAuacuggggaugggcg.....    | 1    | 1 | seq |
| .....guaguacuggggaugggcU.....    | 4    | 1 | seq |
| .....guaguacuggggaugggGg.....    | 41   | 1 | seq |
| .....guaguGcuggggaugggcg.....    | 1    | 1 | seq |
| .....guaguacuggggaucggcg.....    | 1    | 1 | seq |
| .....guaguacCgggaugggcg.....     | 1    | 1 | seq |
| .....guaguacuggggaugggcC.....    | 3    | 1 | seq |
| .....guaguacuggggaugggAcg.....   | 2    | 1 | seq |
| .....guaguacuggggaugggcg.....    | 75   | 0 | seq |
| .....guaguacuggggaugggGga.....   | 1    | 1 | seq |
| .....guaguacuggggauggggcga.....  | 3    | 0 | seq |
| .....uaguacuggggauggCcg.....     | 2    | 1 | seq |
| .....uaUuacuggggaugggcg.....     | 1    | 1 | seq |
| .....uaguacuggggaucggcg.....     | 2    | 1 | seq |
| .....Caguacuggggaugggcg.....     | 1    | 1 | seq |
| .....uaguacuggggaugggcg.....     | 113  | 0 | seq |
| .....uaguacuggggaugggcU.....     | 6    | 1 | seq |
| .....uaguacuggggaugggGg.....     | 82   | 1 | seq |
| .....uaguacuggggaGgggcg.....     | 2    | 1 | seq |
| .....uaguacuggggaugggcC.....     | 3    | 1 | seq |
| .....uaguacuggggaugggcCa.....    | 1    | 1 | seq |
| .....uaguacuggggaugggcga.....    | 1    | 0 | seq |
| .....uaguacuggggauggggcgU.....   | 1    | 1 | seq |
| .....uaguacuggggaugggcgacc.....  | 2    | 0 | seq |
| .....uaguacuggggaugggcgaccC..... | 1    | 1 | seq |
| .....aguacuggggaugggGga.....     | 3    | 1 | seq |
| .....aguGcuggggaugggcga.....     | 1    | 1 | seq |
| .....aguacuggggaugggcgU.....     | 1    | 1 | seq |
| .....aguacuggggaugggGgacc.....   | 2    | 1 | seq |
| .....aguacuggggaugggcgacc.....   | 1    | 0 | seq |
| .....guacuggggaugggcgac.....     | 1    | 0 | seq |
| .....guacuggggaugggcgGcc.....    | 1    | 1 | seq |
| .....uacuggggaugggcgacc.....     | 1    | 0 | seq |
| .....acuggggaugggcgaccC.....     | 1    | 1 | seq |

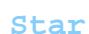[illegible]



Star

## Mature

cggguuuucugucagauuugugaaguuuugguagaguuacaaauuuuuuuuuugaaaauuaagugagggaguuguuacuugaaaaaggguuuacaauccauuuacg

|                              |   |   |     |
|------------------------------|---|---|-----|
| .....guguuacuuugaaaaaAg..... | 3 | 1 | seq |
| .....uuguuacuuugaaaaaag..... | 7 | 0 | seq |
| .....uuguuacuuugaaaaaAg..... | 1 | 1 | seq |
| .....uguuacuuugaaaaaAg.....  | 1 | 1 | seq |
| .....uguuacuuugaaaaaagC..... | 1 | 1 | seq |

[illegible]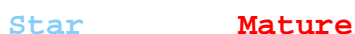

|                                                                                                             |                                                                                                                   |       |     |        |
|-------------------------------------------------------------------------------------------------------------|-------------------------------------------------------------------------------------------------------------------|-------|-----|--------|
| 5'-                                                                                                         | cguucuauccgaaaagccaacagguaaaaaaagggaugacugua <b>caguucguacaguccacguggcaugucgacuggcagaucgacgguccauacaacugacgug</b> | -3'   | exp |        |
| (((((...(((.....((((.....))))). ....)))..((((((((((....((((((((((.....)))))).)))))..))..)))))).. .. .))))). |                                                                                                                   | reads | mm  | sample |
| .....aaUaagggaugacugua.....                                                                                 | 1                                                                                                                 | 1     |     | seq    |
| .....aagggaugacuguaUG.....                                                                                  | 1                                                                                                                 | 1     |     | seq    |
| .....Uucgacugugcagaucg.....                                                                                 | 4                                                                                                                 | 1     |     | seq    |
| .....Uucgacugugcagaucgu.....                                                                                | 6                                                                                                                 | 1     |     | seq    |
| .....Uucgacugugcagaucgua.....                                                                               | 7                                                                                                                 | 1     |     | seq    |
| .....Uucgacugugcagaucguac.....                                                                              | 1                                                                                                                 | 1     |     | seq    |
| .....Uucgacugugcagaucguacg.....                                                                             | 2                                                                                                                 | 1     |     | seq    |
| .....gucgacugugcagaucguaUG.....                                                                             | 1                                                                                                                 | 1     |     | seq    |
| .....ucgacugugcagaucgu.....                                                                                 | 3                                                                                                                 | 0     |     | seq    |
| .....ucgacugugcagaucgC.....                                                                                 | 1                                                                                                                 | 1     |     | seq    |
| .....ucgacugugcagaucguU.....                                                                                | 2                                                                                                                 | 1     |     | seq    |
| .....ucgacugugcagaucgua.....                                                                                | 5                                                                                                                 | 0     |     | seq    |
| .....ucgacugugcagaucguaUG.....                                                                              | 3                                                                                                                 | 1     |     | seq    |
| .....ucgacugugcagaucguaUgg.....                                                                             | 1                                                                                                                 | 1     |     | seq    |
| .....cgacugugcagaucgCa.....                                                                                 | 1                                                                                                                 | 1     |     | seq    |
| .....cgacugugcagaucgua.....                                                                                 | 1                                                                                                                 | 0     |     | seq    |
| .....cgacugugcagaucguaU.....                                                                                | 1                                                                                                                 | 1     |     | seq    |
| .....cgacugugcagaucguaUG.....                                                                               | 3                                                                                                                 | 1     |     | seq    |
| .....acugugcagaucguaUG.....                                                                                 | 2                                                                                                                 | 1     |     | seq    |

[illegible]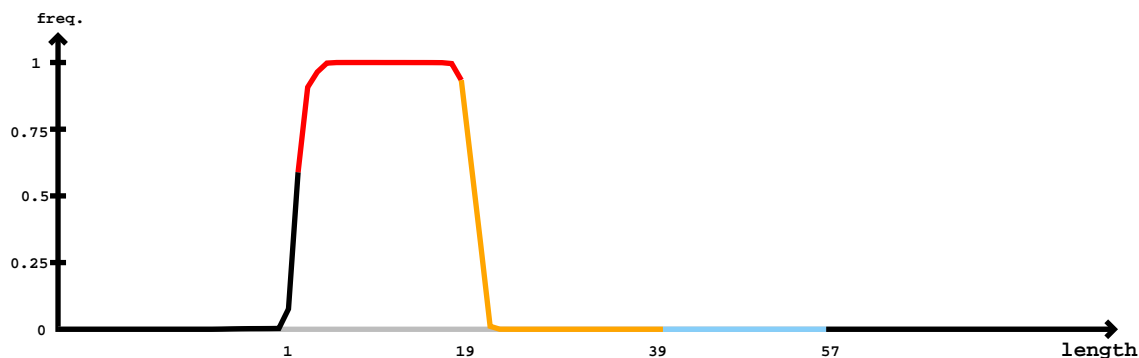

Star

[illegible]

## Star

[illegible]

## Mature

## Star

gcucuguagugaagugcgcuuaggcuagaguguagucuggggaugaagacugccuggggaauuccuaguauuuuacaugccuaugggcauuuuauaaacuuagacuaauuga

|                                  |      |   |     |
|----------------------------------|------|---|-----|
| .....Nuagaguaguacuggga.....      | 17   | 1 | seq |
| .....cuagaguCguacuggga.....      | 1    | 1 | seq |
| .....Nuagaguaguacugggau.....     | 1    | 1 | seq |
| .....cuagaguaguacugggau.....     | 1705 | 0 | seq |
| .....cuagaguaguacugggaug.....    | 5911 | 0 | seq |
| .....cuagaguCguacugggaug.....    | 2    | 1 | seq |
| .....Nuagaguaguacugggaug.....    | 14   | 1 | seq |
| .....cuCgaguaguacugggaug.....    | 1    | 1 | seq |
| .....cuGgaguaguacugggauga.....   | 1    | 1 | seq |
| .....cuagaguaguacugggauUa.....   | 1    | 1 | seq |
| .....cuagGguaguacugggauga.....   | 23   | 1 | seq |
| .....cuagaguagCacugggauga.....   | 1    | 1 | seq |
| .....cuagaguaguacugggGuga.....   | 1    | 1 | seq |
| .....cuagUguaguacugggauga.....   | 1    | 1 | seq |
| .....cuagaguaguacugggauga.....   | 173  | 0 | seq |
| .....cuagaguaguacugggaugaU.....  | 1    | 1 | seq |
| .....cuagaguaguacugggaugaGg..... | 1    | 1 | seq |
| .....cuagaguaguacugggGugaag..... | 1    | 1 | seq |
| .....uCgaguaguacugggau.....      | 1    | 1 | seq |
| .....uagaguaguacugggau.....      | 1470 | 0 | seq |
| .....Nagaguaguacugggau.....      | 2    | 1 | seq |
| .....uCgaguaguacugggaug.....     | 1    | 1 | seq |
| .....uagaguaguacugggaug.....     | 1889 | 0 | seq |
| .....uagaguCguacugggaug.....     | 1    | 1 | seq |
| .....Nagaguaguacugggaug.....     | 1    | 1 | seq |
| .....uagaUuaguacugggauga.....    | 1    | 1 | seq |
| .....uagaguaguacugggauUa.....    | 1    | 1 | seq |
| .....uagGguaguacugggauga.....    | 4    | 1 | seq |
| .....uagaguaguacugggauga.....    | 30   | 0 | seq |
| .....uagaguaguacugggaugCa.....   | 2    | 1 | seq |
| .....Cgaguaguacugggaug.....      | 3    | 1 | seq |
| .....agaguaguacugggaug.....      | 1946 | 0 | seq |
| .....Ngaguaguacugggaug.....      | 3    | 1 | seq |
| .....agaguaguacugggauga.....     | 41   | 0 | seq |
| .....agGguaguacugggauga.....     | 3    | 1 | seq |
| .....Naguaguacugggauga.....      | 1    | 1 | seq |
| .....gaguaguacugggauga.....      | 114  | 0 | seq |
| .....gUguaguacugggauga.....      | 1    | 1 | seq |
| .....gGguaguacugggauga.....      | 5    | 1 | seq |
| .....gaguaguacugggaGga.....      | 3    | 1 | seq |
| .....gaguaguacCgggauga.....      | 1    | 1 | seq |
| .....Uaguaguacugggauga.....      | 1    | 1 | seq |
| .....gaguaguacugggauUa.....      | 1    | 1 | seq |
| .....gaguGguacugggauga.....      | 1    | 1 | seq |
| .....gaguaguacugggaAga.....      | 1    | 1 | seq |
| .....gaguaguacugggaugaa.....     | 1    | 0 | seq |
| .....aguaguacugggaugGag.....     | 1    | 1 | seq |
| .....guaguacugggaugGaga.....     | 1    | 1 | seq |
| .....guacugggaugaagacA.....      | 1    | 1 | seq |

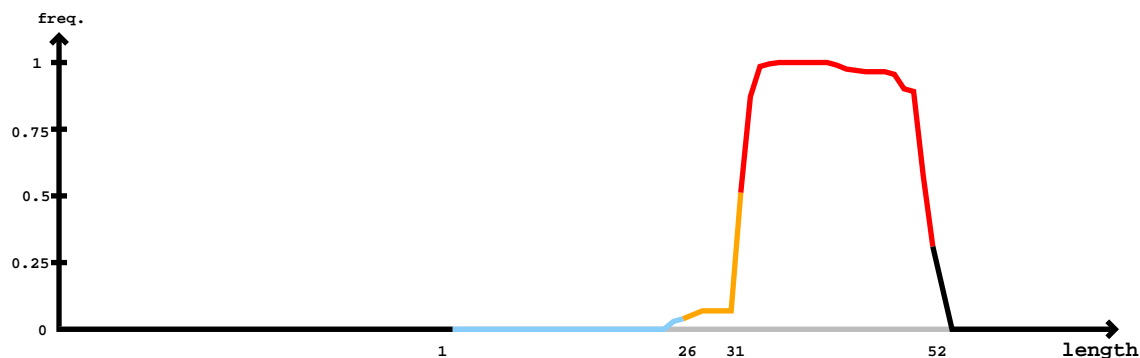

| 5'                                                                                     | Star | Mature                     | -3'   | exp |        |
|----------------------------------------------------------------------------------------|------|----------------------------|-------|-----|--------|
| ccccccucgguuuccuaccugaaacggaucgaaacucggaaaucgguaucgucggccagg                           |      | aaacgucgucggucguacuguauggc |       |     |        |
| ...((.(((((((.....)))))))).(((((((.....(((((((.(((.....)))))))))))))).)))).))))). .... |      |                            | reads | mm  | sample |
| .....ggaaacgCcgucggucg.....                                                            |      |                            | 2     | 1   | seq    |
| .....ggaaacgCcgucggucgu.....                                                           |      |                            | 2     | 1   | seq    |
| .....ggaaacgCcgucggucgua.....                                                          |      |                            | 1     | 1   | seq    |
| .....ggaaacgCcgucggucguac.....                                                         |      |                            | 1     | 1   | seq    |
| .....gaaacgCcgucggucgu.....                                                            |      |                            | 1     | 1   | seq    |
| .....gaaacgCcgucggucguacuguaug.....                                                    |      |                            | 1     | 1   | seq    |
| .....aaacgCcgucggucguacugu.....                                                        |      |                            | 1     | 1   | seq    |
| .....aaacgCcgucggucguacugua.....                                                       |      |                            | 3     | 1   | seq    |
| .....aacgCcgucggucguacugu.....                                                         |      |                            | 1     | 1   | seq    |
| .....aacgCcgucggucguacugua.....                                                        |      |                            | 1     | 1   | seq    |
| .....Ccgucggucguacugua.....                                                            |      |                            | 7     | 1   | seq    |
| .....Ccgucggucguacugua.....                                                            |      |                            | 1     | 1   | seq    |
| .....Ccgucggucguacuguaug.....                                                          |      |                            | 21    | 1   | seq    |
| .....Ncgucggucguacuguaugg.....                                                         |      |                            | 1     | 1   | seq    |
| .....Ccgucggucguacuguaugg.....                                                         |      |                            | 23    | 1   | seq    |
| .....Ccgucggucguacuguauggc.....                                                        |      |                            | 36    | 1   | seq    |
| .....Ccgucggucguacuguauggcg.....                                                       |      |                            | 1     | 1   | seq    |
| .....cgucggucguacugua.....                                                             |      |                            | 1     | 0   | seq    |
| .....cgucggucguacuguaug.....                                                           |      |                            | 30    | 0   | seq    |
| .....cAucggucguacuguaug.....                                                           |      |                            | 1     | 1   | seq    |
| .....cgucggAcguaug.....                                                                |      |                            | 1     | 1   | seq    |
| .....cgucggucguacuguaugA.....                                                          |      |                            | 2     | 1   | seq    |
| .....cgucggucguacuguaugg.....                                                          |      |                            | 13    | 0   | seq    |
| .....cgCcgucguacuguaugg.....                                                           |      |                            | 1     | 1   | seq    |
| .....cgucggucguacugCauggc.....                                                         |      |                            | 1     | 1   | seq    |
| .....cgucggucguacuguauggc.....                                                         |      |                            | 19    | 0   | seq    |
| .....cgucggucguacuguauggG.....                                                         |      |                            | 4     | 1   | seq    |
| .....gucggucguacuguaA.....                                                             |      |                            | 1     | 1   | seq    |
| .....gucggucguacuguaug.....                                                            |      |                            | 9     | 0   | seq    |
| .....gucggucguacuguaugA.....                                                           |      |                            | 1     | 1   | seq    |
| .....gucggucguacuguaugg.....                                                           |      |                            | 12    | 0   | seq    |
| .....ucggucguacuguaugg.....                                                            |      |                            | 1     | 0   | seq    |
| .....ucggucguacuguauggc.....                                                           |      |                            | 1     | 0   | seq    |
| .....cgucguacuguauggc.....                                                             |      |                            | 1     | 0   | seq    |

Star

Mature

cccccccucggguuccuaccugaaaccgauacgaaacu<sup>gggaaucggguacgauacggccagg</sup><sup>aaacgucgucggguacuguauggc</sup>guuucucgauuuggaaac

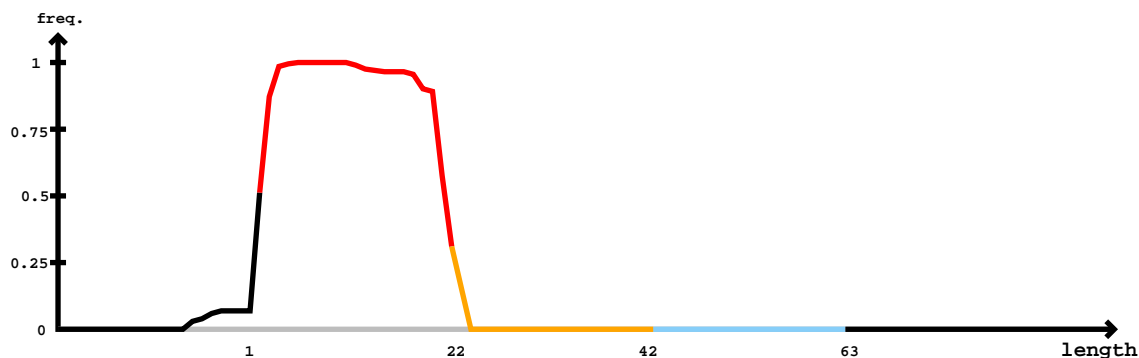

Star



**Mature**

**Star**

acgauacggccaggaacgucgucggucguacuguaugggcguuucucgaauuggaaacgcuauacggguacugccagcggcguuuccuggccguaccagcccguacggc

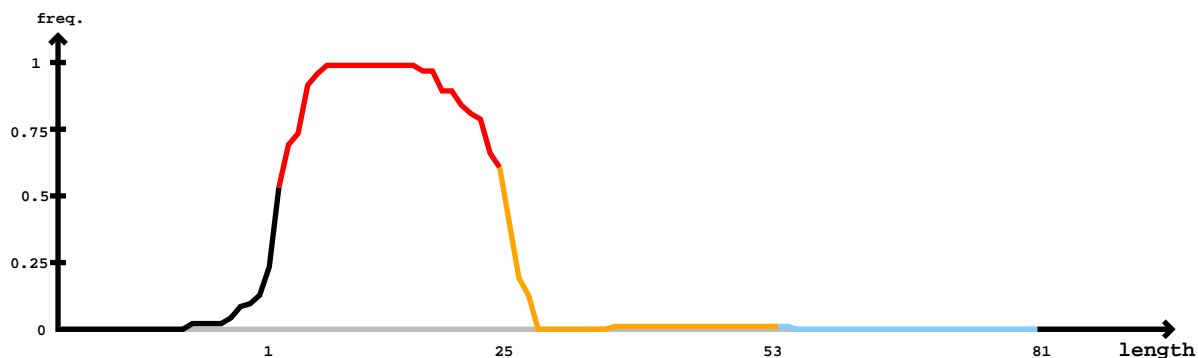

Star

| 5'- | ggaaugcacaauuuuccuauucguuuucugauuugccgagaucgcacagggcguaagggcaaaagagcauacgcga              | gaucuaaaagagcaauccgaaaaacaaauaauuaaaacc | -3'   | exp |        |
|-----|-------------------------------------------------------------------------------------------|-----------------------------------------|-------|-----|--------|
|     | ((((((((.....))))))....((((((-((((((((.....((((((-.....)))))).))))....).))))..))))). .... |                                         | reads | mm  | sample |
|     | .....uuuuuccuUucuguuuucugauuugc.....                                                      |                                         | 2     | 1   | seq    |
|     | .....ccuUucuguuuucugauuugccgag.....                                                       |                                         | 2     | 1   | seq    |
|     | .....cuCucuguuuucugauuugccg.....                                                          |                                         | 1     | 1   | seq    |
|     | .....cuUucuguuuucugauuugccg.....                                                          |                                         | 1     | 1   | seq    |
|     | .....cuCucuguuuucugauuugccgag.....                                                        |                                         | 1     | 1   | seq    |
|     | .....cuUucuguuuucugauuugccgaga.....                                                       |                                         | 1     | 1   | seq    |
|     | .....uCucuguuuucugauuugccg.....                                                           |                                         | 1     | 1   | seq    |
|     | .....Cucuguuuucugauuugccg.....                                                            |                                         | 1     | 1   | seq    |
|     | .....Cucuguuuucugauuugccgag.....                                                          |                                         | 1     | 1   | seq    |
|     | .....Cucuguuuucugauuugccgagau.....                                                        |                                         | 1     | 1   | seq    |
|     | .....ucuguuuucugauuugccg.....                                                             |                                         | 1     | 0   | seq    |
|     | .....ucuguuuucugauuugcUgag.....                                                           |                                         | 1     | 1   | seq    |
|     | .....ucuguuuucugauuUccgagau.....                                                          |                                         | 1     | 1   | seq    |
|     | .....ucuguuuucugauuugccgagau.....                                                         |                                         | 2     | 0   | seq    |
|     | .....ucuguuuucugauuugccgagauU.....                                                        |                                         | 1     | 1   | seq    |
|     | .....ucuguuuucugauuugccgagaucg.....                                                       |                                         | 4     | 0   | seq    |
|     | .....cuguuuucugauuugccg.....                                                              |                                         | 1     | 0   | seq    |
|     | .....cuguuuucugauuugcUg.....                                                              |                                         | 1     | 1   | seq    |
|     | .....cuAuuucugauuugccgagau.....                                                           |                                         | 1     | 1   | seq    |
|     | .....cuguuuucugauuugccgagau.....                                                          |                                         | 1     | 0   | seq    |
|     | .....cugCuucugauuugccgagaucgc.....                                                        |                                         | 1     | 1   | seq    |
|     | .....cuguuuucugauuugccgagaucgA.....                                                       |                                         | 1     | 1   | seq    |
|     | .....cuguuuucugauuugccgagaucgc.....                                                       |                                         | 19    | 0   | seq    |
|     | .....Uuguuuucugauuugccgagaucgc.....                                                       |                                         | 2     | 1   | seq    |
|     | .....cuguuuucugauuugcUgagaucgc.....                                                       |                                         | 1     | 1   | seq    |
|     | .....uAuuucugauuugccgagau.....                                                            |                                         | 1     | 1   | seq    |
|     | .....uguuuucugauuUaccgagau.....                                                           |                                         | 1     | 1   | seq    |
|     | .....uguuuucugauuugcUgagau.....                                                           |                                         | 1     | 1   | seq    |
|     | .....uguuuucugauuugccgagau.....                                                           |                                         | 1     | 0   | seq    |
|     | .....uguuuucugauuugcUgagaucgc.....                                                        |                                         | 1     | 1   | seq    |
|     | .....uguuuucugauuugccgagaucgc.....                                                        |                                         | 1     | 0   | seq    |
|     | .....uguuuucugauuugccgagaucgcC.....                                                       |                                         | 2     | 1   | seq    |
|     | .....uguuuucugauuugccgagaucgcU.....                                                       |                                         | 4     | 1   | seq    |
|     | .....uguuuucugauuugccgagaucgca.....                                                       |                                         | 3     | 0   | seq    |

Mature

Star

|                      |                           |                              |                            |               |   |   |     |
|----------------------|---------------------------|------------------------------|----------------------------|---------------|---|---|-----|
| ggaagaucacauuuuccuau | cuguuuucugauuugccgagaucgc | acaggggcguagggcaaagagcauacgc | gaucuaaaagagcauuccgaaaacaa | aaauaaaaaccaa |   |   |     |
| .....                | guuucugauuugccgagaucgc    | .....                        |                            |               | 1 | 0 | seq |
| .....                | guuucugauuugccgagaucgcUc  | .....                        |                            |               | 3 | 1 | seq |
| .....                | uuucugauuugccgagauc       | .....                        |                            |               | 2 | 1 | seq |
| .....                | uuucugauuugccgagauc       | .....                        |                            |               | 2 | 0 | seq |
| .....                | uuucugauuugccgagaucg      | .....                        |                            |               | 1 | 0 | seq |
| .....                | uuucugauuugccgagaucgc     | .....                        |                            |               | 1 | 0 | seq |
| .....                | uuucugauuugccgagaucgcUc   | .....                        |                            |               | 3 | 1 | seq |
| .....                | uuucugauuugccgagaucgcaca  | .....                        |                            |               | 2 | 0 | seq |
| .....                | uuucugauuugccgagaucgcUca  | .....                        |                            |               | 6 | 1 | seq |
| .....                | uucugauuugccgagau         | .....                        |                            |               | 1 | 0 | seq |
| .....                | uucugauuugccgagaucgc      | .....                        |                            |               | 1 | 0 | seq |
| .....                | uucugauuugccgagauUgca     | .....                        |                            |               | 1 | 1 | seq |
| .....                | uucugauuugccgagaucgcaca   | .....                        |                            |               | 1 | 0 | seq |
| .....                | ucugauuugccgagaucgcUca    | .....                        |                            |               | 3 | 1 | seq |
| .....                | ggcaaagagcauacgcagC       | .....                        |                            |               | 1 | 1 | seq |



**Mature**

Star

| Sequence                                                                                                                                 | Count | Category | Label |
|------------------------------------------------------------------------------------------------------------------------------------------|-------|----------|-------|
| ugccaugccagcaauucugua <u>aaugcuucacccucaa</u> ugcc <u>caauuu</u> aaauuacaucaauuucacugcugcgagauuggg <u>cagugagggugaga</u> ucauuacagaaauag | 5     | 1        | seq   |
| .....uaugcuucacccucaa <u>ugcG</u> .....                                                                                                  | 1     | 1        | seq   |
| .....ua <u>Gugcuucacccucaa</u> ugcc.....                                                                                                 | 1     | 1        | seq   |
| .....u <u>Gaugcuucacccucaa</u> ugcc.....                                                                                                 | 1     | 1        | seq   |
| .....ua <u>augcuucacccucaa</u> ugcU.....                                                                                                 | 127   | 1        | seq   |
| .....u <u>Caugcuucacccucaa</u> ugcc.....                                                                                                 | 1     | 1        | seq   |
| .....ua <u>augcuucacccucaa</u> ugccA.....                                                                                                | 1     | 1        | seq   |
| .....ua <u>augcuucacccucaa</u> ugccU.....                                                                                                | 2     | 1        | seq   |
| .....ua <u>augcuucacccucaa</u> ugccC.....                                                                                                | 1     | 1        | seq   |
| .....a <u>augcuucacccucaa</u> ug.....                                                                                                    | 1     | 0        | seq   |
| .....a <u>augcuucacccucaa</u> ugcc.....                                                                                                  | 2     | 0        | seq   |
| .....a <u>augcuucacccucaa</u> ugccc.....                                                                                                 | 1     | 1        | seq   |
| .....a <u>augcuucacccucaa</u> ugccU.....                                                                                                 | 1     | 1        | seq   |
| .....a <u>ugcuucacccucaa</u> ugc.....                                                                                                    | 1     | 0        | seq   |
| .....a <u>ugcuucacccucaa</u> ugcU.....                                                                                                   | 1     | 1        | seq   |
| .....u <u>gcuucacccucaa</u> ugcc.....                                                                                                    | 1     | 0        | seq   |
| .....cuucacccucaa <u>ugccca</u> Guu.....                                                                                                 | 1     | 1        | seq   |
| .....ucacccucaa <u>ugccca</u> uu.....                                                                                                    | 1     | 0        | seq   |
| .....ucacccucaa <u>ugccca</u> uuuu.....                                                                                                  | 1     | 0        | seq   |
| .....Nc <u>acccucaa</u> ugcccauuuu.....                                                                                                  | 1     | 1        | seq   |
| .....a <u>gaauugggca</u> Augagggugaa.....                                                                                                | 1     | 1        | seq   |
| .....g <u>auugggca</u> Augaggggu.....                                                                                                    | 1     | 1        | seq   |

[illegible]

## Star

## Mature

|                             |                             |                        |                       |                      |  |  |  |
|-----------------------------|-----------------------------|------------------------|-----------------------|----------------------|--|--|--|
| gcagaagagugggaaagcucagguuuu | ggggauguaggcuugggugg        | aguggggaagaccacgcuagcc | aaagaacucuucaauagaaag | aggucccauuucggaaaauc |  |  |  |
| .....                       | Uaagaacucuucaauagaaag.....  | 1                      | 1                     | seq                  |  |  |  |
| .....                       | aaGgaacucuucaauagaaag.....  | 1                      | 1                     | seq                  |  |  |  |
| .....                       | aaagaacucuucaauagaaGg.....  | 2                      | 1                     | seq                  |  |  |  |
| .....                       | aaagaacucCucaauagaaag.....  | 2                      | 1                     | seq                  |  |  |  |
| .....                       | aaagaGcucuucaauagaaag.....  | 2                      | 1                     | seq                  |  |  |  |
| .....                       | aaagaacucuCcaauagaaag.....  | 2                      | 1                     | seq                  |  |  |  |
| .....                       | aaagaacucuuUaaauagaaag..... | 19                     | 1                     | seq                  |  |  |  |
| .....                       | aaagaacucUAcaauagaaag.....  | 1                      | 1                     | seq                  |  |  |  |
| .....                       | aaagaacucuucaauagaaag.....  | 265                    | 0                     | seq                  |  |  |  |
| .....                       | Gaagaacucuucaauagaaag.....  | 2                      | 1                     | seq                  |  |  |  |
| .....                       | aaagaacucuuGauagaaag.....   | 1                      | 1                     | seq                  |  |  |  |
| .....                       | aagaacucuucaauagaa.....     | 1                      | 0                     | seq                  |  |  |  |
| .....                       | aagaacucuucaauagaa.....     | 1                      | 0                     | seq                  |  |  |  |
| .....                       | aagaacucuucaauagaaag.....   | 3                      | 0                     | seq                  |  |  |  |
| .....                       | aagaacucuucaauagaaaga.....  | 36                     | 0                     | seq                  |  |  |  |
| .....                       | aagaacucuucaGuagaaaga.....  | 2                      | 1                     | seq                  |  |  |  |
| .....                       | agaacucuucaauagaaa.....     | 1                      | 0                     | seq                  |  |  |  |
| .....                       | agaacucuucaauagaaaga.....   | 1                      | 0                     | seq                  |  |  |  |
| .....                       | agaacucuucaauagaaagaA.....  | 1                      | 1                     | seq                  |  |  |  |





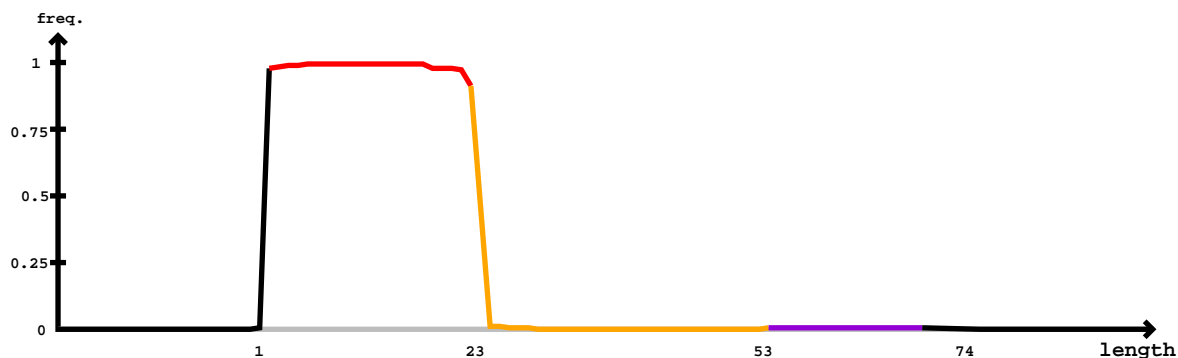

Star

[illegible]



## Star

## Mature

|                                                     |                    |                              |                 |
|-----------------------------------------------------|--------------------|------------------------------|-----------------|
| uacauggugagagcgucgcuuugcaugcgagagguacggggguucgauacc | cgguagagcgucgcuuug | caugcgagagguacggggguucgauacc | cccgcaucuccaaua |
| ...ugguagagcUcucgcuuug                              | 2                  | 1                            | seq             |
| ...ugguagagcgucgcuuug                               | 4                  | 0                            | seq             |
| ...ugguagagcgucgcuuGgc                              | 1                  | 1                            | seq             |
| ...ugguagagcUcucgcuuugc                             | 1                  | 1                            | seq             |
| ...ugguagagcgGcgcuuugcaugcg                         | 1                  | 1                            | seq             |
| ...ugguagagcgucgcuuugcaugcgaga                      | 2                  | 0                            | seq             |
| ...ugguagagcgucgcuuGgcgaugcgagagg                   | 1                  | 1                            | seq             |
| ...uGguagagcgucgcuuugcaugcgagagguA                  | 2                  | 1                            | seq             |
| ...ugguagagcgucgcuuGgcgaugcgagagguA                 | 1                  | 1                            | seq             |
| ...ugguagagcgGcgcuuugcaugcgagagguacggg              | 1                  | 1                            | seq             |
| ...ugguagagcgGcgcuuugcaugcgagagguacggggguuc         | 1                  | 1                            | seq             |
| ...gguagagcgucgcuu                                  | 16                 | 0                            | seq             |
| ...Cguagagcgucgcuu                                  | 2                  | 1                            | seq             |
| ...gguGgagcgucgcuu                                  | 2                  | 1                            | seq             |
| ...guagagcgucgcuuugcaugcg                           | 2                  | 0                            | seq             |
| ...agagcgucgcuuugcaugcgagagguacggggguucg            | 2                  | 0                            | seq             |
| ...Aagcgucgcuuugcaugcgagagguacggggguuc              | 2                  | 1                            | seq             |
| ...agcgucgcuuugcaugcgagagguacggggguA                | 2                  | 1                            | seq             |
| ...agcgucgcuuugcaugcgagagguacggggguuc               | 2                  | 0                            | seq             |
| ...agcgucgcuuugcUugcgagagguacggggguucg              | 4                  | 1                            | seq             |
| ...gcucgcuuugcaugcgagagguacgggggu                   | 2                  | 0                            | seq             |
| ...ucgcuuugcaugcgagagguacggggguucg                  | 2                  | 0                            | seq             |
| ...cgcuuugcaugcgagagguacgggggu                      | 2                  | 0                            | seq             |
| ...cgcuuugcaugcgagagguacggggguuc                    | 2                  | 0                            | seq             |
| ...cgcuuugcaugcgagagguacggggguucg                   | 6                  | 0                            | seq             |
| ...gcuuugcaugcgagagCuacggggguu                      | 2                  | 1                            | seq             |
| ...cuuugcaugcgagagguacggggguuc                      | 2                  | 0                            | seq             |
| ...uuGcgauugcgagagguacggggg                         | 2                  | 1                            | seq             |
| ...uugcaugcgagagguacgggggu                          | 4                  | 0                            | seq             |
| ...uugcaugcgagagguacggggguu                         | 2                  | 0                            | seq             |
| ...ugcUugcgagagguacggggguuc                         | 2                  | 1                            | seq             |
| ...ugcaugcgagagguacggggguuc                         | 2                  | 0                            | seq             |
| ...ugcaugcgagagguacggggguucg                        | 4                  | 0                            | seq             |
| ...ugcUugcgagagguacggggguucg                        | 2                  | 1                            | seq             |
| ...gcaugcgagagguacggg                               | 2                  | 0                            | seq             |
| ...gcUugcgagagguacggg                               | 2                  | 1                            | seq             |
| ...gcaugcgagagguacggggguu                           | 2                  | 0                            | seq             |
| ...gcUugcgagagguacggggguu                           | 2                  | 1                            | seq             |
| ...gcUugcgagagguacggggguuc                          | 4                  | 1                            | seq             |
| ...gcaugcgagagguacggggguucg                         | 6                  | 0                            | seq             |
| ...Ccaugcgagagguacggggguucg                         | 2                  | 1                            | seq             |
| ...caugcgagagguacggg                                | 2                  | 0                            | seq             |
| ...cUugcgagagguacggg                                | 6                  | 1                            | seq             |
| ...caugcgagagUuacgggg                               | 2                  | 1                            | seq             |
| ...cUugcgagagguacgggg                               | 2                  | 1                            | seq             |
| ...cUugcgagagguacggggg                              | 4                  | 1                            | seq             |
| ...caugcgagagguacggggg                              | 6                  | 0                            | seq             |
| ...caugcgagagguacgggggu                             | 10                 | 0                            | seq             |
| ...cUugcgagagguacgggggu                             | 6                  | 1                            | seq             |
| ...caugcgagUgguacgggggu                             | 2                  | 1                            | seq             |
| ...caugcgagagguacggggguu                            | 6                  | 0                            | seq             |
| ...cUugcgagagguacggggguu                            | 10                 | 1                            | seq             |
| ...caugcgagagguacggggguuc                           | 16                 | 0                            | seq             |
| ...cUugcgagagguacggggguuc                           | 30                 | 1                            | seq             |
| ...cCugcgagagguacggggguuc                           | 4                  | 1                            | seq             |
| ...cCugcgagagguacggggguucg                          | 8                  | 1                            | seq             |
| ...caugcgagagguacggggguucU                          | 2                  | 1                            | seq             |
| ...cUugcgagagguacggggguucg                          | 42                 | 1                            | seq             |
| ...caugcgagagguacggggguucg                          | 20                 | 0                            | seq             |
| ...caugcgagagguacggggguucga                         | 2                  | 0                            | seq             |
| ...cUugcgagagguacggggguucgau                        | 2                  | 1                            | seq             |
| ...augcgagagguacggggg                               | 8                  | 0                            | seq             |
| ...augcgagUgguacgggggu                              | 2                  | 1                            | seq             |
| ...Uugcgagagguacgggggu                              | 4                  | 1                            | seq             |
| ...augcgagagguacgggggu                              | 4                  | 0                            | seq             |
| ...Cugcgagagguacggggguu                             | 6                  | 1                            | seq             |
| ...Uugcgagagguacggggguu                             | 6                  | 1                            | seq             |
| ...Uugcgagagguacggggguuc                            | 38                 | 1                            | seq             |
| ...augcgagagCuacggggguuc                            | 2                  | 1                            | seq             |
| ...augcgagagguacggggguuc                            | 18                 | 0                            | seq             |

## Star

## Mature

|                                                                                                               |       |   |     |
|---------------------------------------------------------------------------------------------------------------|-------|---|-----|
| uacaugguagagcgucgcuuugcaugcgagagguacggggguucgauaccgguagagcgucgcuuugcaugcgagagguacggggguucgauaccgccgaucuccaaua |       |   |     |
| .....Cugcgagagguacggggguuc.....                                                                               | 34    | 1 | seq |
| .....Nugcgagagguacggggguucg.....                                                                              | 2     | 1 | seq |
| .....Uugcgagagguacggggguucg.....                                                                              | 64    | 1 | seq |
| .....Cugcgagagguacggggguucg.....                                                                              | 24    | 1 | seq |
| .....augcgagagggAacggggguucg.....                                                                             | 2     | 1 | seq |
| .....augcgagagguacggggguucg.....                                                                              | 24    | 0 | seq |
| .....uUcgagagguacgggggu.....                                                                                  | 2     | 1 | seq |
| .....ugcgaUagguacgggggu.....                                                                                  | 2     | 1 | seq |
| .....ugcgagagguacUgggu.....                                                                                   | 4     | 1 | seq |
| .....ugcgagagguacgCggu.....                                                                                   | 6     | 1 | seq |
| .....ugcgagagguacgggggu.....                                                                                  | 4326  | 0 | seq |
| .....ugcgagagguacggUgu.....                                                                                   | 4     | 1 | seq |
| .....uCcagagagguacgggggu.....                                                                                 | 2     | 1 | seq |
| .....Ggcgagagguacgggggu.....                                                                                  | 6     | 1 | seq |
| .....ugcgagagguAagggu.....                                                                                    | 2     | 1 | seq |
| .....ugcgagagguacgUgggu.....                                                                                  | 4     | 1 | seq |
| .....ugcgagagguUcgggggu.....                                                                                  | 6     | 1 | seq |
| .....ugcgagagggAacgggggu.....                                                                                 | 2     | 1 | seq |
| .....ugcUagagguacgggggu.....                                                                                  | 4     | 1 | seq |
| .....ugcgagagCuacgggggu.....                                                                                  | 2     | 1 | seq |
| .....Ngcgagagguacgggggu.....                                                                                  | 10    | 1 | seq |
| .....ugcgagUggguacgggggu.....                                                                                 | 4     | 1 | seq |
| .....uAacgagagguacgggggu.....                                                                                 | 10    | 1 | seq |
| .....ugcgagagguacggggC.....                                                                                   | 704   | 1 | seq |
| .....ugcgagagUuacgggggu.....                                                                                  | 2     | 1 | seq |
| .....ugcgagaUguacgggggu.....                                                                                  | 2     | 1 | seq |
| .....ugcgagagNuacgggggu.....                                                                                  | 2     | 1 | seq |
| .....ugcgagagguGcgggggu.....                                                                                  | 14    | 1 | seq |
| .....ugcgagagguacgggCu.....                                                                                   | 8     | 1 | seq |
| .....ugcgagagguacggUguu.....                                                                                  | 2     | 1 | seq |
| .....ugcgagagggAacggggguu.....                                                                                | 2     | 1 | seq |
| .....ugcgagagguacggggguA.....                                                                                 | 68    | 1 | seq |
| .....ugcgagagguacggggCu.....                                                                                  | 50    | 1 | seq |
| .....ugcgagUggguacggggguu.....                                                                                | 2     | 1 | seq |
| .....ugcgagaAguacggggguu.....                                                                                 | 4     | 1 | seq |
| .....uAacgagagguacggggguu.....                                                                                | 4     | 1 | seq |
| .....ugcgagagguacggggguC.....                                                                                 | 682   | 1 | seq |
| .....Ngcgagagguacggggguu.....                                                                                 | 4     | 1 | seq |
| .....ugcgagagguUcggggguu.....                                                                                 | 4     | 1 | seq |
| .....ugcgagagguGcggggguu.....                                                                                 | 14    | 1 | seq |
| .....ugcgagagUuacggggguu.....                                                                                 | 4     | 1 | seq |
| .....ugcUagagguacggggguu.....                                                                                 | 2     | 1 | seq |
| .....ugcgagaUguacggggguu.....                                                                                 | 2     | 1 | seq |
| .....ugcgagagguacUggguu.....                                                                                  | 4     | 1 | seq |
| .....Ggcgagagguacggggguu.....                                                                                 | 6     | 1 | seq |
| .....ugcgagagguacggggguu.....                                                                                 | 4182  | 0 | seq |
| .....ugcgagagguacggggguAc.....                                                                                | 2     | 1 | seq |
| .....ugcgagagguacggggguA.....                                                                                 | 206   | 1 | seq |
| .....ugcgagagggAacggggguuc.....                                                                               | 2     | 1 | seq |
| .....ugcgagagguCcgggguuc.....                                                                                 | 2     | 1 | seq |
| .....ugcgagagguUcggggguuc.....                                                                                | 2     | 1 | seq |
| .....ugcgagagguacUggggguuc.....                                                                               | 4     | 1 | seq |
| .....ugcgCgagguacggggguuc.....                                                                                | 4     | 1 | seq |
| .....ugcgagagguacggggguGc.....                                                                                | 34    | 1 | seq |
| .....ugcgagagUuacggggguuc.....                                                                                | 2     | 1 | seq |
| .....uUcgagagguacggggguuc.....                                                                                | 2     | 1 | seq |
| .....ugcgagagguacggggCuC.....                                                                                 | 64    | 1 | seq |
| .....Ggcgagagguacggggguuc.....                                                                                | 26    | 1 | seq |
| .....ugcgagagguacgCgguuc.....                                                                                 | 2     | 1 | seq |
| .....ugcUagagguacggggguuc.....                                                                                | 6     | 1 | seq |
| .....ugcgagagguacggggguuc.....                                                                                | 14250 | 0 | seq |
| .....ugcgaUagguacggggguuc.....                                                                                | 2     | 1 | seq |
| .....ugcgagaAguacggggguuc.....                                                                                | 2     | 1 | seq |
| .....ugcgagagguacCggguuc.....                                                                                 | 2     | 1 | seq |
| .....ugcgagagguacggggguCc.....                                                                                | 132   | 1 | seq |
| .....ugcgagagguacggUguuc.....                                                                                 | 4     | 1 | seq |
| .....ugcgagUggguacggggguuc.....                                                                               | 22    | 1 | seq |
| .....ugcgagagguacgUggguuc.....                                                                                | 6     | 1 | seq |
| .....ugcgagagguacgggCuuc.....                                                                                 | 2     | 1 | seq |
| .....ugcgaCagguacggggguuc.....                                                                                | 4     | 1 | seq |

## Star

## Mature

uacaugguagagcgcgcguuugcaugcgcagagguacggggguucgauaccgguagagcgcgcguuugcaugcgcagagguacggggguucgauaccgcgcgaucuccaaua

|                                    |       |   |     |
|------------------------------------|-------|---|-----|
| .....ugcgagagguGcgggguuc.....      | 36    | 1 | seq |
| .....ugcgagagCuacggggguuc.....     | 2     | 1 | seq |
| .....uAcgagagguacggggguuc.....     | 30    | 1 | seq |
| .....Ngcgagagguacggggguuc.....     | 18    | 1 | seq |
| .....uGgagagguacggggguuc.....      | 4     | 1 | seq |
| .....ugcgagagguacggggGuCcg.....    | 28    | 1 | seq |
| .....ugcgagagUuacggggguucg.....    | 4     | 1 | seq |
| .....uAcgagagguacggggguucg.....    | 18    | 1 | seq |
| .....ugcgagagguGcgggguucg.....     | 22    | 1 | seq |
| .....ugcgagagguacggggguucU.....    | 136   | 1 | seq |
| .....ugcgagagguacggUguucg.....     | 6     | 1 | seq |
| .....ugcgagCgguacggggguucg.....    | 2     | 1 | seq |
| .....ugcgagagguacUggguucg.....     | 10    | 1 | seq |
| .....ugcgagagguacggggguucg.....    | 10064 | 0 | seq |
| .....ugcgagaAguacggggguucg.....    | 4     | 1 | seq |
| .....ugcgagagCuacggggguucg.....    | 2     | 1 | seq |
| .....ugcgagaggAacggggguucg.....    | 10    | 1 | seq |
| .....ugcgagUggguacggggguucg.....   | 18    | 1 | seq |
| .....uCcagagagguacggggguucg.....   | 2     | 1 | seq |
| .....ugcUagagguacggggguucg.....    | 2     | 1 | seq |
| .....ugAgagagguacggggguucg.....    | 4     | 1 | seq |
| .....ugGgagagguacggggguucg.....    | 2     | 1 | seq |
| .....ugcgagagguacggggguGcg.....    | 16    | 1 | seq |
| .....ugcgagagguacggggGuCcg.....    | 20    | 1 | seq |
| .....ugcgagagguacggggguuAag.....   | 12    | 1 | seq |
| .....Ggcgagagguacggggguucg.....    | 10    | 1 | seq |
| .....ugcgaUagguacggggguucg.....    | 4     | 1 | seq |
| .....ugcgagagguacgAagguucg.....    | 6     | 1 | seq |
| .....Ngcgagagguacggggguucg.....    | 6     | 1 | seq |
| .....ugcgagagguacggggguAcg.....    | 4     | 1 | seq |
| .....ugcgagagguUcgggguucg.....     | 12    | 1 | seq |
| .....ugcgagagguacggggguucgca.....  | 6     | 0 | seq |
| .....ugcgagagguacggggGuCcgca.....  | 2     | 1 | seq |
| .....ugcgagagguacggggguAcgca.....  | 2     | 1 | seq |
| .....ugcgagagguacggggguucCa.....   | 2     | 1 | seq |
| .....ugcgagagguacgAagguucgca.....  | 2     | 1 | seq |
| .....ugcgagagguacggggguucgGu.....  | 4     | 1 | seq |
| .....ugcgagagguacggggguucgcau..... | 2     | 0 | seq |
| .....gcgagagguacggggguuA.....      | 48    | 1 | seq |
| .....gcgagagguGcgggguu.....        | 8     | 1 | seq |
| .....gcgagagCuacggggguu.....       | 2     | 1 | seq |
| .....Ncgagagguacggggguu.....       | 4     | 1 | seq |
| .....gcgagagguacggggGu.....        | 28    | 1 | seq |
| .....gcgagUggguacggggguu.....      | 2     | 1 | seq |
| .....gcgagagguacggggGuC.....       | 386   | 1 | seq |
| .....gcgagagguacUggguu.....        | 2     | 1 | seq |
| .....gcgagagguacggggguu.....       | 2298  | 0 | seq |
| .....Ucgagagguacggggguu.....       | 6     | 1 | seq |
| .....gcgagaggAacggggguu.....       | 2     | 1 | seq |
| .....Acgagagguacggggguu.....       | 6     | 1 | seq |
| .....gcgagagguacgCgguuc.....       | 2     | 1 | seq |
| .....gcgagagguacggggguuc.....      | 7948  | 0 | seq |
| .....gcgagagguacCggguuc.....       | 2     | 1 | seq |
| .....Ncgagagguacggggguuc.....      | 12    | 1 | seq |
| .....gcgCgagguacggggguuc.....      | 2     | 1 | seq |
| .....gcgagagguacggggGuCuc.....     | 48    | 1 | seq |
| .....gcgagagguacggggGuCC.....      | 70    | 1 | seq |
| .....gGgagagguacggggguuc.....      | 2     | 1 | seq |
| .....Acgagagguacggggguuc.....      | 24    | 1 | seq |
| .....gcgagagCuacggggguuc.....      | 2     | 1 | seq |
| .....gcgagagguGcgggguuc.....       | 12    | 1 | seq |
| .....gcgagagguUcgggguuc.....       | 2     | 1 | seq |
| .....gcgagagUuacggggguuc.....      | 2     | 1 | seq |
| .....gcgagCgguacggggguuc.....      | 6     | 1 | seq |
| .....Ccagagguacggggguuc.....       | 2     | 1 | seq |
| .....gcgagagguacggggGuC.....       | 14    | 1 | seq |
| .....gcgagagguacggggCuuc.....      | 2     | 1 | seq |
| .....gcgagagguacggggguuA.....      | 82    | 1 | seq |
| .....gcgagagguacggCguuc.....       | 2     | 1 | seq |
| .....gcgagaAguacggggguuc.....      | 4     | 1 | seq |

## Star

## Mature

|                                                    |                    |                              |                 |
|----------------------------------------------------|--------------------|------------------------------|-----------------|
| uacaugguagagcgucgcuuugcaugcgagagguacggggguucgauacc | cgguagagcgucgcuuug | caugcgagagguacggggguucgauacc | cgcgcaucuccaaua |
| .....gcgagUgguaacggggguuc.....                     | 12                 | 1                            | seq             |
| .....gcgagagguacUggguuc.....                       | 2                  | 1                            | seq             |
| .....Ucgagagguacggggguuc.....                      | 4                  | 1                            | seq             |
| .....gcgagagguacggUguuc.....                       | 4                  | 1                            | seq             |
| .....gcgagagguacggggguucU.....                     | 68                 | 1                            | seq             |
| .....gcUagagguacggggguucg.....                     | 8                  | 1                            | seq             |
| .....gcgagagguUcggggguucg.....                     | 2                  | 1                            | seq             |
| .....gcgagCgguaacggggguucg.....                    | 2                  | 1                            | seq             |
| .....gcgagagguacggggguGcg.....                     | 6                  | 1                            | seq             |
| .....gcgagUgguaacggggguucg.....                    | 4                  | 1                            | seq             |
| .....Ucgagagguacggggguucg.....                     | 6                  | 1                            | seq             |
| .....gcgagagguacUggguucg.....                      | 2                  | 1                            | seq             |
| .....gcgagaAguacggggguucg.....                     | 2                  | 1                            | seq             |
| .....gcgagagguacggggguCcg.....                     | 22                 | 1                            | seq             |
| .....Acgagagguacggggguucg.....                     | 12                 | 1                            | seq             |
| .....gcgagagguacggggguuAg.....                     | 4                  | 1                            | seq             |
| .....gcgagaggAacggggguucg.....                     | 8                  | 1                            | seq             |
| .....Ncgagagguacggggguucg.....                     | 2                  | 1                            | seq             |
| .....gcgagagguacggggCucg.....                      | 16                 | 1                            | seq             |
| .....gcgagagguacggggguucg.....                     | 5312               | 0                            | seq             |
| .....gcgagagguUcggggguucg.....                     | 16                 | 1                            | seq             |
| .....Ccgagagguacggggguucg.....                     | 2                  | 1                            | seq             |
| .....gcgagagguacggggguucgG.....                    | 2                  | 1                            | seq             |
| .....gcgagagguacggggguucgC.....                    | 2                  | 1                            | seq             |
| .....gcgagagguacggggguucCa.....                    | 2                  | 1                            | seq             |
| .....gcgagagguacggggguucgCu.....                   | 2                  | 1                            | seq             |
| .....gcgagagguacggggguucgau.....                   | 4                  | 0                            | seq             |
| .....gcgagagguacggggguucgUu.....                   | 4                  | 1                            | seq             |
| .....gcgagagguacggggguucgaGa.....                  | 2                  | 1                            | seq             |
| .....cgagagguacggggguuc.....                       | 182                | 0                            | seq             |
| .....cgagUgguaacggggguuc.....                      | 2                  | 1                            | seq             |
| .....cgagagguacggggguuA.....                       | 2                  | 1                            | seq             |
| .....cUagagguacggggguuc.....                       | 2                  | 1                            | seq             |
| .....Ggagagguacggggguuc.....                       | 2                  | 1                            | seq             |
| .....cgagagguUcggggguuc.....                       | 2                  | 1                            | seq             |
| .....cgagagguacggggguuAg.....                      | 2                  | 1                            | seq             |
| .....cgagagguacggggguucU.....                      | 2                  | 1                            | seq             |
| .....Agagagguacggggguucg.....                      | 2                  | 1                            | seq             |
| .....cgagagguacggggguCcg.....                      | 2                  | 1                            | seq             |
| .....cgagagguacggggguucg.....                      | 106                | 0                            | seq             |
| .....gagagguacggggCucg.....                        | 4                  | 1                            | seq             |
| .....gagagguacggggguucg.....                       | 728                | 0                            | seq             |
| .....gagagguGcggggguucg.....                       | 2                  | 1                            | seq             |
| .....gagagguacggggguGcg.....                       | 2                  | 1                            | seq             |
| .....gagagguacgAgguucg.....                        | 2                  | 1                            | seq             |
| .....gagagguacggggguCcg.....                       | 2                  | 1                            | seq             |
| .....Cagagguacggggguucg.....                       | 2                  | 1                            | seq             |
| .....gaUagguacggggguucg.....                       | 2                  | 1                            | seq             |
| .....gagagguacggggguuAg.....                       | 4                  | 1                            | seq             |
| .....agagguacggggguucgG.....                       | 2                  | 1                            | seq             |
| .....agagguacggggguucga.....                       | 6                  | 0                            | seq             |
| .....agagguacggggguucgC.....                       | 2                  | 1                            | seq             |
| .....agagguacggggguucgau.....                      | 2                  | 0                            | seq             |
| .....agagguacggggguucgUuac.....                    | 2                  | 1                            | seq             |
| .....gagguacggggguucgaC.....                       | 2                  | 1                            | seq             |
| .....gagguacggggguucgUua.....                      | 2                  | 1                            | seq             |
| .....gagguacggggguucgUuac.....                     | 2                  | 1                            | seq             |
| .....gagguacggggguucgGuacc.....                    | 2                  | 1                            | seq             |
| .....gagguacggggguucgUuaccc.....                   | 2                  | 1                            | seq             |
| .....agguacggggguucgaAa.....                       | 2                  | 1                            | seq             |
| .....cgguagagcgucgcuu.....                         | 4                  | 0                            | seq             |
| .....cgguagagcgucgcuuC.....                        | 3                  | 1                            | seq             |
| .....cgguagagcgucgcuuu.....                        | 14                 | 0                            | seq             |
| .....cgguagagcgucgcuuug.....                       | 1                  | 0                            | seq             |
| .....cgguagagcAcucgcuuugc.....                     | 1                  | 1                            | seq             |
| .....cgguagagcgucgcuuugc.....                      | 1                  | 0                            | seq             |
| .....Cguagagcgucgcuuu.....                         | 2                  | 1                            | seq             |
| .....gguagagcgucgcuuu.....                         | 16                 | 0                            | seq             |
| .....gguGgagcgucgcuuu.....                         | 2                  | 1                            | seq             |
| .....guagagcgucgcuuugcaugcg.....                   | 2                  | 0                            | seq             |

# Star Mature

|                                                                                                             |      |   |     |
|-------------------------------------------------------------------------------------------------------------|------|---|-----|
| uacaugguagagcgcucgcuuugcaugcgagagguacgggguucgauaccgguagagcgcucgcuuugcaugcgagagguacgggguucgauaccgcaucuccaaua |      |   |     |
| .....agagcgcucgcuuugcaugcgagagguacgggguucg.....                                                             | 2    | 0 | seq |
| .....Aagcgcucgcuuugcaugcgagagguacgggguuc.....                                                               | 2    | 1 | seq |
| .....agcgcucgcuuugcaugcgagagguacgggguuA.....                                                                | 2    | 1 | seq |
| .....agcgcucgcuuugcaugcgagagguacgggguuc.....                                                                | 2    | 0 | seq |
| .....agcgcucgcuuugcUugcgagagguacgggguucg.....                                                               | 4    | 1 | seq |
| .....gcucgcuuugcaugcgagagguacggggu.....                                                                     | 2    | 0 | seq |
| .....ucgcuuugcaugcgagagguacgggguucg.....                                                                    | 2    | 0 | seq |
| .....cgcuuugcaugcgagagguacggggu.....                                                                        | 2    | 0 | seq |
| .....cgcuuugcaugcgagagguacgggguuc.....                                                                      | 2    | 0 | seq |
| .....cgcuuugcaugcgagagguacgggguucg.....                                                                     | 6    | 0 | seq |
| .....gcuuugcaugcgagagCuaaggguu.....                                                                         | 2    | 1 | seq |
| .....cuuugcaugcgagagguacgggguuc.....                                                                        | 2    | 0 | seq |
| .....uuGgcaugcgagagguacgggg.....                                                                            | 2    | 1 | seq |
| .....uugcaugcgagagguacggggu.....                                                                            | 4    | 0 | seq |
| .....uugcaugcgagagguacgggguu.....                                                                           | 2    | 0 | seq |
| .....ugcUugcgagagguacgggguuc.....                                                                           | 2    | 1 | seq |
| .....ugcaugcgagagguacgggguuc.....                                                                           | 2    | 0 | seq |
| .....ugcaugcgagagguacgggguucg.....                                                                          | 4    | 0 | seq |
| .....ugcUugcgagagguacgggguucg.....                                                                          | 2    | 1 | seq |
| .....gcUugcgagagguacggg.....                                                                                | 2    | 1 | seq |
| .....gcaugcgagagguacggg.....                                                                                | 2    | 0 | seq |
| .....gcUugcgagagguacgggguu.....                                                                             | 2    | 1 | seq |
| .....gcaugcgagagguacgggguu.....                                                                             | 2    | 0 | seq |
| .....gcUugcgagagguacgggguuc.....                                                                            | 4    | 1 | seq |
| .....Ccaugcgagagguacgggguucg.....                                                                           | 2    | 1 | seq |
| .....gcaugcgagagguacgggguucg.....                                                                           | 6    | 0 | seq |
| .....cUugcgagagguacggg.....                                                                                 | 6    | 1 | seq |
| .....caugcgagagguacggg.....                                                                                 | 2    | 0 | seq |
| .....caugcgagagUuacgggg.....                                                                                | 2    | 1 | seq |
| .....caugcgagagguacggg.....                                                                                 | 6    | 0 | seq |
| .....cUugcgagagguacggg.....                                                                                 | 4    | 1 | seq |
| .....cCugcgagagguacggg.....                                                                                 | 2    | 1 | seq |
| .....caugcgagagguacggggu.....                                                                               | 10   | 0 | seq |
| .....caugcgagUggguacggggu.....                                                                              | 2    | 1 | seq |
| .....cUugcgagagguacggggu.....                                                                               | 6    | 1 | seq |
| .....cUugcgagagguacgggguu.....                                                                              | 10   | 1 | seq |
| .....caugcgagagguacgggguu.....                                                                              | 6    | 0 | seq |
| .....caugcgagagguacgggguuc.....                                                                             | 16   | 0 | seq |
| .....cCugcgagagguacgggguuc.....                                                                             | 4    | 1 | seq |
| .....cUugcgagagguacgggguuc.....                                                                             | 30   | 1 | seq |
| .....cUugcgagagguacgggguucg.....                                                                            | 42   | 1 | seq |
| .....cCugcgagagguacgggguucg.....                                                                            | 8    | 1 | seq |
| .....caugcgagagguacgggguucU.....                                                                            | 2    | 1 | seq |
| .....caugcgagagguacgggguucg.....                                                                            | 20   | 0 | seq |
| .....caugcgagagguacgggguucga.....                                                                           | 2    | 0 | seq |
| .....cUugcgagagguacgggguucgau.....                                                                          | 2    | 1 | seq |
| .....augcgagagguacgggg.....                                                                                 | 8    | 0 | seq |
| .....Uugcgagagguacggggu.....                                                                                | 4    | 1 | seq |
| .....augcgagUggguacggggu.....                                                                               | 2    | 1 | seq |
| .....augcgagagguacggggu.....                                                                                | 4    | 0 | seq |
| .....Uugcgagagguacgggguu.....                                                                               | 6    | 1 | seq |
| .....Cugcgagagguacgggguu.....                                                                               | 6    | 1 | seq |
| .....augcgagagguacgggguuc.....                                                                              | 18   | 0 | seq |
| .....Cugcgagagguacgggguuc.....                                                                              | 34   | 1 | seq |
| .....Uugcgagagguacgggguuc.....                                                                              | 38   | 1 | seq |
| .....augcgagagCuaaggguuuc.....                                                                              | 2    | 1 | seq |
| .....Cugcgagagguacgggguucg.....                                                                             | 24   | 1 | seq |
| .....Nugcgagagguacgggguucg.....                                                                             | 2    | 1 | seq |
| .....Uugcgagagguacgggguucg.....                                                                             | 64   | 1 | seq |
| .....augcgagagguacgggguucg.....                                                                             | 24   | 0 | seq |
| .....augcgagagggAacgggguucg.....                                                                            | 2    | 1 | seq |
| .....ugcgagagguacggggu.....                                                                                 | 4326 | 0 | seq |
| .....uAcgagagguacggggu.....                                                                                 | 10   | 1 | seq |
| .....ugcgagagNuacggggu.....                                                                                 | 2    | 1 | seq |
| .....ugcgagagCuaagggu.....                                                                                  | 2    | 1 | seq |
| .....ugcgagUggguacggggu.....                                                                                | 4    | 1 | seq |
| .....ugcgagagguGcggggu.....                                                                                 | 14   | 1 | seq |
| .....ugcUagagguacggggu.....                                                                                 | 4    | 1 | seq |
| .....uUcgagagguacggggu.....                                                                                 | 2    | 1 | seq |
| .....ugcgagagguacUgggu.....                                                                                 | 4    | 1 | seq |



Star

Mature

|                                                                                                                |       |   |     |
|----------------------------------------------------------------------------------------------------------------|-------|---|-----|
| uacaugguagagcgcucgcuuugcaugcgagagguacgggguucgauacccgguagagcgcucgcuuugcaugcgagagguacgggguucgauaccccgcaucuccaaua |       |   |     |
| .....ugcgagagguAgggggu.....                                                                                    | 2     | 1 | seq |
| .....Ngcgagagguacgggggu.....                                                                                   | 10    | 1 | seq |
| .....ugcgagagguUcggggu.....                                                                                    | 6     | 1 | seq |
| .....ugcgagaUguacgggggu.....                                                                                   | 2     | 1 | seq |
| .....ugcgagagguacgUgggu.....                                                                                   | 4     | 1 | seq |
| .....Gcgagagguacgggggu.....                                                                                    | 6     | 1 | seq |
| .....ugcgaUagguacgggggu.....                                                                                   | 2     | 1 | seq |
| .....ugcgagagguacggggC.....                                                                                    | 704   | 1 | seq |
| .....ugcgagagUuacgggggu.....                                                                                   | 2     | 1 | seq |
| .....ugcgagagguacggUgu.....                                                                                    | 4     | 1 | seq |
| .....uCcgagagguacgggggu.....                                                                                   | 2     | 1 | seq |
| .....ugcgagaggAacgggggu.....                                                                                   | 2     | 1 | seq |
| .....ugcgagagguacgCgggu.....                                                                                   | 6     | 1 | seq |
| .....ugcgagagguacgggCu.....                                                                                    | 8     | 1 | seq |
| .....ugcgagaUguacgggggu.....                                                                                   | 2     | 1 | seq |
| .....ugcgagagguGcgggggu.....                                                                                   | 14    | 1 | seq |
| .....ugcgagUggguacgggggu.....                                                                                  | 2     | 1 | seq |
| .....Ngcgagagguacgggggu.....                                                                                   | 4     | 1 | seq |
| .....ugcgagaggAacgggggu.....                                                                                   | 2     | 1 | seq |
| .....ugcgagagguacggUguu.....                                                                                   | 2     | 1 | seq |
| .....ugcgagaAguacgggggu.....                                                                                   | 4     | 1 | seq |
| .....ugcgagagguacUggguu.....                                                                                   | 4     | 1 | seq |
| .....ugcUagagguacgggggu.....                                                                                   | 2     | 1 | seq |
| .....ugcgagagguacggggCu.....                                                                                   | 50    | 1 | seq |
| .....Gcgagagguacgggggu.....                                                                                    | 6     | 1 | seq |
| .....ugcgagagUuacgggggu.....                                                                                   | 4     | 1 | seq |
| .....ugcgagagguUcggggu.....                                                                                    | 4     | 1 | seq |
| .....ugcgagagguacgggggu.....                                                                                   | 4182  | 0 | seq |
| .....ugcgagagguacggggguA.....                                                                                  | 68    | 1 | seq |
| .....ugcgagagguacggggguC.....                                                                                  | 682   | 1 | seq |
| .....uAcgagagguacgggggu.....                                                                                   | 4     | 1 | seq |
| .....ugGgagagguacggggguuc.....                                                                                 | 4     | 1 | seq |
| .....ugcgagagguGcggggguuc.....                                                                                 | 36    | 1 | seq |
| .....ugcgagagguacgggCuuc.....                                                                                  | 2     | 1 | seq |
| .....Ngcgagagguacggggguuc.....                                                                                 | 18    | 1 | seq |
| .....ugcgagagguacggggguGc.....                                                                                 | 34    | 1 | seq |
| .....ugcgagagguUcgggguuc.....                                                                                  | 2     | 1 | seq |
| .....ugcgCgagguacggggguuc.....                                                                                 | 4     | 1 | seq |
| .....Gcgagagguacggggguuc.....                                                                                  | 26    | 1 | seq |
| .....ugcgagagguacggggguuc.....                                                                                 | 14250 | 0 | seq |
| .....ugcgagagguacggggCu.....                                                                                   | 64    | 1 | seq |
| .....ugcgagagCuacggggguuc.....                                                                                 | 2     | 1 | seq |
| .....ugcgagagguacggggguAc.....                                                                                 | 2     | 1 | seq |
| .....ugcgaUagguacggggguuc.....                                                                                 | 2     | 1 | seq |
| .....ugcgagagguacgCggguuc.....                                                                                 | 2     | 1 | seq |
| .....ugcgagaggAacggggguuc.....                                                                                 | 2     | 1 | seq |
| .....ugcgagagguacUggguuc.....                                                                                  | 4     | 1 | seq |
| .....ugcgagUggguacggggguuc.....                                                                                | 22    | 1 | seq |
| .....uUcgagagguacggggguuc.....                                                                                 | 2     | 1 | seq |
| .....ugcgagagguacggUguuc.....                                                                                  | 4     | 1 | seq |
| .....ugcgagagguacggggguCc.....                                                                                 | 132   | 1 | seq |
| .....ugcgagaAguacggggguuc.....                                                                                 | 2     | 1 | seq |
| .....ugcgaCagguacggggguuc.....                                                                                 | 4     | 1 | seq |
| .....ugcgagagUuacggggguuc.....                                                                                 | 2     | 1 | seq |
| .....ugcgagagguacCggguuc.....                                                                                  | 2     | 1 | seq |
| .....ugcgagagguacgUggguuc.....                                                                                 | 6     | 1 | seq |
| .....ugcgagagguCcggggguuc.....                                                                                 | 2     | 1 | seq |
| .....uAcgagagguacggggguuc.....                                                                                 | 30    | 1 | seq |
| .....ugcUagagguacggggguuc.....                                                                                 | 6     | 1 | seq |
| .....ugcgagagguacggggguuA.....                                                                                 | 206   | 1 | seq |
| .....ugcgagagguacggggguuAg.....                                                                                | 12    | 1 | seq |
| .....ugcgagagguacggggCu.....                                                                                   | 28    | 1 | seq |
| .....ugcUagagguacggggguucg.....                                                                                | 2     | 1 | seq |
| .....ugcgagCggguacggggguucg.....                                                                               | 2     | 1 | seq |
| .....ugcgaUagguacggggguucg.....                                                                                | 4     | 1 | seq |
| .....ugcgagagguacggggguAcg.....                                                                                | 4     | 1 | seq |
| .....ugcgagagguacggggguucg.....                                                                                | 10064 | 0 | seq |
| .....ugcgagaggAacggggguucg.....                                                                                | 10    | 1 | seq |
| .....uCcgagagguacggggguucg.....                                                                                | 2     | 1 | seq |
| .....ugGgagagguacggggguucg.....                                                                                | 2     | 1 | seq |

Star

Mature

|                                                                                                                 |      |   |     |
|-----------------------------------------------------------------------------------------------------------------|------|---|-----|
| uacaugguagagcgcucgcuuugcaugcgagagguacgggguucgauacccgguagagcgcucgcuuugcaugcgagagguacggggguucgauaccccgcaucuccaaua |      |   |     |
| .....ugcgagaAguacggggguucg.....                                                                                 | 4    | 1 | seq |
| .....ugcgagUgguaacggggguucg.....                                                                                | 18   | 1 | seq |
| .....ugcgagagUuacggggguucg.....                                                                                 | 4    | 1 | seq |
| .....ugcgagagguUcggggguucg.....                                                                                 | 12   | 1 | seq |
| .....ugcgagagguacggggguucU.....                                                                                 | 136  | 1 | seq |
| .....uAcgagagguacggggguucg.....                                                                                 | 18   | 1 | seq |
| .....ugAgagagguacggggguucg.....                                                                                 | 4    | 1 | seq |
| .....ugcgagagguacggggguCcg.....                                                                                 | 20   | 1 | seq |
| .....ugcgagagguGcggggguucg.....                                                                                 | 22   | 1 | seq |
| .....ugcgagagguacgAgguucg.....                                                                                  | 6    | 1 | seq |
| .....ugcgagagCuacggggguucg.....                                                                                 | 2    | 1 | seq |
| .....ugcgagagguacggggguGcg.....                                                                                 | 16   | 1 | seq |
| .....ugcgagagguacggUguucg.....                                                                                  | 6    | 1 | seq |
| .....Ngcgagagguacggggguucg.....                                                                                 | 6    | 1 | seq |
| .....Gcgagagguacggggguucg.....                                                                                  | 10   | 1 | seq |
| .....ugcgagagguacUggguucg.....                                                                                  | 10   | 1 | seq |
| .....ugcgagagguacgAgguucga.....                                                                                 | 2    | 1 | seq |
| .....ugcgagagguacggggguucCa.....                                                                                | 2    | 1 | seq |
| .....ugcgagagguacggggCuca.....                                                                                  | 2    | 1 | seq |
| .....ugcgagagguacggggguucga.....                                                                                | 6    | 0 | seq |
| .....ugcgagagguacggggguAcga.....                                                                                | 2    | 1 | seq |
| .....ugcgagagguacggggguucgGu.....                                                                               | 4    | 1 | seq |
| .....ugcgagagguacggggguucgau.....                                                                               | 2    | 0 | seq |
| .....ugcgagagguacggggguucgUuaccccgca.....                                                                       | 2    | 1 | seq |
| .....ugcgagagguacggggguucgauaccccgcauc.....                                                                     | 1    | 0 | seq |
| .....gcgagagguacgggggu.....                                                                                     | 2298 | 0 | seq |
| .....gcgagagguGcgggggu.....                                                                                     | 8    | 1 | seq |
| .....gcgagagguacUgggu.....                                                                                      | 2    | 1 | seq |
| .....Acgagagguacgggggu.....                                                                                     | 6    | 1 | seq |
| .....gcgagagguacggggCu.....                                                                                     | 28   | 1 | seq |
| .....gcgagaggAacgggggu.....                                                                                     | 2    | 1 | seq |
| .....gcgagagguacggggguC.....                                                                                    | 386  | 1 | seq |
| .....gcgagUgguaacgggggu.....                                                                                    | 2    | 1 | seq |
| .....Ucgagagguacgggggu.....                                                                                     | 6    | 1 | seq |
| .....Ncgagagguacgggggu.....                                                                                     | 4    | 1 | seq |
| .....gcgagagCuacgggggu.....                                                                                     | 2    | 1 | seq |
| .....gcgagagguacggggguA.....                                                                                    | 48   | 1 | seq |
| .....gcgagagguacggggguCc.....                                                                                   | 70   | 1 | seq |
| .....Acgagagguacggggguuc.....                                                                                   | 24   | 1 | seq |
| .....gcgagagguacgggCuuc.....                                                                                    | 2    | 1 | seq |
| .....gcgagagguacggggCu.....                                                                                     | 48   | 1 | seq |
| .....gcgCgagguacggggguuc.....                                                                                   | 2    | 1 | seq |
| .....gcgagagguacgCggguuc.....                                                                                   | 2    | 1 | seq |
| .....gcgagagUuacggggguuc.....                                                                                   | 2    | 1 | seq |
| .....gcgagagguacggggguuc.....                                                                                   | 7948 | 0 | seq |
| .....gGgagagguacggggguuc.....                                                                                   | 2    | 1 | seq |
| .....gcgagagguUcggggguuc.....                                                                                   | 2    | 1 | seq |
| .....gcgagagguacggggguGc.....                                                                                   | 14   | 1 | seq |
| .....gcgagagCuacggggguuc.....                                                                                   | 2    | 1 | seq |
| .....gcgagagguacggUguuc.....                                                                                    | 4    | 1 | seq |
| .....gcgagagguGcggggguuc.....                                                                                   | 12   | 1 | seq |
| .....gcgagCgguaacggggguuc.....                                                                                  | 6    | 1 | seq |
| .....Ccagagagguacggggguuc.....                                                                                  | 2    | 1 | seq |
| .....gcgagagguacCggguuc.....                                                                                    | 2    | 1 | seq |
| .....gcgagagguacggCguuc.....                                                                                    | 2    | 1 | seq |
| .....Ncgagagguacggggguuc.....                                                                                   | 12   | 1 | seq |
| .....Ucgagagguacggggguuc.....                                                                                   | 4    | 1 | seq |
| .....gcgagUgguaacggggguuc.....                                                                                  | 12   | 1 | seq |
| .....gcgagagguacUggguuc.....                                                                                    | 2    | 1 | seq |
| .....gcgagaAguacggggguuc.....                                                                                   | 4    | 1 | seq |
| .....gcgagagguacggggguuA.....                                                                                   | 82   | 1 | seq |
| .....gcgagagguacggggguCcg.....                                                                                  | 22   | 1 | seq |
| .....gcgagagguacggggguuAg.....                                                                                  | 4    | 1 | seq |
| .....gcgagagguacggggCu.....                                                                                     | 16   | 1 | seq |
| .....gcgagagguacggggguucg.....                                                                                  | 5312 | 0 | seq |
| .....Acgagagguacggggguucg.....                                                                                  | 12   | 1 | seq |
| .....gcgagUgguaacggggguucg.....                                                                                 | 4    | 1 | seq |
| .....gcgagagguUcggggguucg.....                                                                                  | 2    | 1 | seq |
| .....gcgagagguacUggguucg.....                                                                                   | 2    | 1 | seq |
| .....gcgagagguacggggguucU.....                                                                                  | 68   | 1 | seq |

## Star

## Mature

uacaugguagagcgcucgcuuugcaugcgagagguacgggguucgauaccgguagagcgcucgcuuugcaugcgagagguacgggguucgauaccccgcaucuccaaua

|                                         |     |   |     |
|-----------------------------------------|-----|---|-----|
| .....Ncgagagguacgggguucg.....           | 2   | 1 | seq |
| .....Ucgagagguacgggguucg.....           | 6   | 1 | seq |
| .....gcgagCggguacgggguucg.....          | 2   | 1 | seq |
| .....gcgagagguacgggguGcg.....           | 6   | 1 | seq |
| .....gcgagaggAacgggguucg.....           | 8   | 1 | seq |
| .....gcUagagguacgggguucg.....           | 8   | 1 | seq |
| .....Ccgagagguacgggguucg.....           | 2   | 1 | seq |
| .....gcgagagguGcgggguucg.....           | 16  | 1 | seq |
| .....gcgagaAguacgggguucg.....           | 2   | 1 | seq |
| .....gcgagagguacgggguucCa.....          | 2   | 1 | seq |
| .....gcgagagguacgggguucgG.....          | 2   | 1 | seq |
| .....gcgagagguacgggguucgC.....          | 2   | 1 | seq |
| .....gcgagagguacgggguucgCu.....         | 2   | 1 | seq |
| .....gcgagagguacgggguucgau.....         | 4   | 0 | seq |
| .....gcgagagguacgggguucgUu.....         | 4   | 1 | seq |
| .....gcgagagguacgggguucgaGa.....        | 2   | 1 | seq |
| .....gcgagagguacgggguucgUuaccccgca..... | 2   | 1 | seq |
| .....gcgagagguacgggguucgGuaccccgca..... | 1   | 1 | seq |
| .....cgagagguacgggguuc.....             | 182 | 0 | seq |
| .....cgagagguUcgggguuc.....             | 2   | 1 | seq |
| .....Ggagagguacgggguuc.....             | 2   | 1 | seq |
| .....cgagUggguacgggguuc.....            | 2   | 1 | seq |
| .....cUagagguacgggguuc.....             | 2   | 1 | seq |
| .....cgagagguacgggguuA.....             | 2   | 1 | seq |
| .....cgagagguacgggguucg.....            | 106 | 0 | seq |
| .....cgagagguacgggguCcg.....            | 2   | 1 | seq |
| .....Agagagguacgggguucg.....            | 2   | 1 | seq |
| .....cgagagguacgggguuAg.....            | 2   | 1 | seq |
| .....cgagagguacgggguucU.....            | 2   | 1 | seq |
| .....gaUagguacgggguucg.....             | 2   | 1 | seq |
| .....gagagguGcgggguucg.....             | 2   | 1 | seq |
| .....gagagguacgAggguucg.....            | 2   | 1 | seq |
| .....Cagagguacgggguucg.....             | 2   | 1 | seq |
| .....gagagguacgggguucg.....             | 728 | 0 | seq |
| .....gagagguacgggguCcg.....             | 2   | 1 | seq |
| .....gagagguacgggguCucg.....            | 4   | 1 | seq |
| .....gagagguacgggguuAg.....             | 4   | 1 | seq |
| .....gagagguacgggguGcg.....             | 2   | 1 | seq |
| .....agagguacgggguucga.....             | 6   | 0 | seq |
| .....agagguacgggguucgG.....             | 2   | 1 | seq |
| .....agagguacgggguucgC.....             | 2   | 1 | seq |
| .....agagguacgggguucgau.....            | 2   | 0 | seq |
| .....agagguacgggguucgUuac.....          | 2   | 1 | seq |
| .....gagguacgggguucgaC.....             | 2   | 1 | seq |
| .....gagguacgggguucgUua.....            | 2   | 1 | seq |
| .....gagguacgggguucgUuac.....           | 2   | 1 | seq |
| .....gagguacgggguucgGuacc.....          | 2   | 1 | seq |
| .....gagguacgggguucgUuaccc.....         | 2   | 1 | seq |
| .....agguacgggguucgaAa.....             | 2   | 1 | seq |
| .....gguacgggguucgauaccccgcauc.....     | 1   | 0 | seq |
| .....guacgggguucgUuacccc.....           | 1   | 1 | seq |
| .....uacgggguucgGuaccccgca.....         | 1   | 1 | seq |
| .....uucgauaccccgcaucu.....             | 1   | 0 | seq |
| .....uucgauaccccgcaucucca.....          | 1   | 0 | seq |
| .....ucgGuaccccgcaucucc.....            | 1   | 1 | seq |
| .....ucgauaccccgcaucuccG.....           | 1   | 1 | seq |
| .....ucgGuaccccgcaucucca.....           | 1   | 1 | seq |
| .....gauaccccgcaucucca.....             | 1   | 0 | seq |
| .....uaccccgcaucuccaaCa.....            | 1   | 1 | seq |
| .....accccgcaucuccaaCa.....             | 1   | 1 | seq |
| .....accccgcaucuccaauG.....             | 1   | 1 | seq |

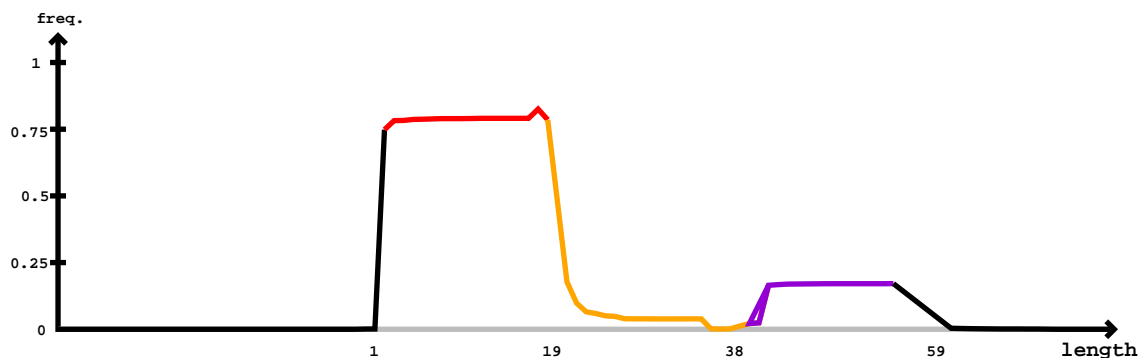

Star

| 5' | aagaaaacaaauaggagauuggggauaguaagucgggguuuagucacacgugguagagcucuuugcuuugcaugugagagguacgggguuucgauaccgccgaucucauaag  | -3'   | obs |        |
|----|-------------------------------------------------------------------------------------------------------------------|-------|-----|--------|
|    | aagaaaacaaauaggagauuggggauaguaagucgggguuuagucacacgugguagagcucuuugcuuugcaugugagagguacgggguuucgauaccgccgaucucauaag  |       | exp |        |
|    | .....((((((((.....(((((((.....(((((((.....(((((((.....)))))))))))))))).....))))).))..)))))).))))).))))).))))..... | reads | mm  | sample |
|    | .....ucggggλuagucacacg.....                                                                                       | 1     | 1   | seq    |
|    | .....ucggggλuagucacacgugguagagc.....                                                                              | 1     | 1   | seq    |
|    | .....cggggλuagucacacg.....                                                                                        | 1     | 1   | seq    |
|    | .....ggggλuagucacacgu.....                                                                                        | 114   | 1   | seq    |
|    | .....gggguuuagucacacλug.....                                                                                      | 1     | 1   | seq    |
|    | .....ggggλuagucacacgug.....                                                                                       | 1295  | 1   | seq    |
|    | .....ggggδuagucacacgug.....                                                                                       | 5     | 1   | seq    |
|    | .....ggggλuagucacacgugg.....                                                                                      | 232   | 1   | seq    |
|    | .....gggguuuagucacacgugg.....                                                                                     | 1     | 0   | seq    |
|    | .....ggggδuagucacacgugg.....                                                                                      | 1     | 1   | seq    |
|    | .....gggguuuagucacacλugg.....                                                                                     | 2     | 1   | seq    |
|    | .....ggggλuagucacacguggu.....                                                                                     | 198   | 1   | seq    |
|    | .....ggggλuagucacacguggua.....                                                                                    | 78    | 1   | seq    |
|    | .....ggggλuagucacacgugguag.....                                                                                   | 15    | 1   | seq    |
|    | .....ggggλuagucacacgugguaga.....                                                                                  | 17    | 1   | seq    |
|    | .....gggguuuagucacacλugguaga.....                                                                                 | 1     | 1   | seq    |
|    | .....ggggλuagucacacgugguagag.....                                                                                 | 6     | 1   | seq    |
|    | .....ggggλuagucacacgugguagagc.....                                                                                | 19    | 1   | seq    |
|    | .....ggggλuagucacacgugguagagcu.....                                                                               | 1     | 1   | seq    |
|    | .....gggλuagucacacgug.....                                                                                        | 65    | 1   | seq    |
|    | .....gggλuagucacacgugg.....                                                                                       | 12    | 1   | seq    |
|    | .....gggλuagucacacguggu.....                                                                                      | 7     | 1   | seq    |
|    | .....gggλuagucacacguggua.....                                                                                     | 4     | 1   | seq    |
|    | .....gggλuagucacacgugguaga.....                                                                                   | 2     | 1   | seq    |
|    | .....ggλuagucacacguggu.....                                                                                       | 1     | 1   | seq    |
|    | .....ggλuagucacacgugguagagc.....                                                                                  | 1     | 1   | seq    |
|    | .....gλuagucacacguggu.....                                                                                        | 6     | 1   | seq    |
|    | .....gλuagucacacguggua.....                                                                                       | 3     | 1   | seq    |
|    | .....gλuagucacacgugguag.....                                                                                      | 1     | 1   | seq    |
|    | .....λuagucacacguggua.....                                                                                        | 2     | 1   | seq    |
|    | .....uagucucaGgugguag.....                                                                                        | 1     | 1   | seq    |
|    | .....uagucucaGgugguaga.....                                                                                       | 1     | 0   | seq    |
|    | .....uagucucaGgugguagagc.....                                                                                     | 1     | 1   | seq    |

## Mature

## Star

aagaaaaaauaggagauuggggauguaagucgggguuuguagcucacgugguagagcucuugcuuugcauguagagguuacggggguucgauaccccgc\_aucucuaaag

|                                       |     |   |     |
|---------------------------------------|-----|---|-----|
| .....guagcucacgugguaga.....           | 1   | 0 | seq |
| .....guagcucaGgugguaga.....           | 1   | 1 | seq |
| .....guagcucacGgugguagagc.....        | 1   | 1 | seq |
| .....gcucacAugguagagcucu.....         | 1   | 1 | seq |
| .....cucacgugguagagcucuCgcuuu.....    | 2   | 1 | seq |
| .....ugguagagcucuAgcuu.....           | 1   | 1 | seq |
| .....ugguagagcGcuugcuuu.....          | 2   | 1 | seq |
| .....ugguagagcucuCgcuuu.....          | 81  | 1 | seq |
| .....ugguagagcucuAgcuuu.....          | 7   | 1 | seq |
| .....ugguagagcucuCgcuuug.....         | 2   | 1 | seq |
| .....ugguagagcucuCgcuuugc.....        | 1   | 1 | seq |
| .....gguagagcucuAgcuuu.....           | 7   | 1 | seq |
| .....uugcaugugagaUguacggggguu.....    | 1   | 1 | seq |
| .....augugagaUguacggggguuc.....       | 1   | 1 | seq |
| .....augugagaUguacggggguucg.....      | 1   | 1 | seq |
| .....augugagagguacggggguucg.....      | 1   | 0 | seq |
| .....ugugagagguacgggggu.....          | 1   | 0 | seq |
| .....ugugagaUguacgggggu.....          | 1   | 1 | seq |
| .....ugugGgagguacgggggu.....          | 1   | 1 | seq |
| .....ugugagagguacgggggG.....          | 1   | 1 | seq |
| .....ugugagaggCacggggguu.....         | 3   | 1 | seq |
| .....ugugagagguacggggguu.....         | 1   | 0 | seq |
| .....ugugagaUguacggggguuc.....        | 1   | 1 | seq |
| .....ugugagagguacggggguuc.....        | 6   | 0 | seq |
| .....ugGgagagguacggggguuc.....        | 2   | 1 | seq |
| .....ugugagagguacggggguuU.....        | 1   | 1 | seq |
| .....ugugagagguacggggguuAg.....       | 1   | 1 | seq |
| .....ugugagagguacggggguucg.....       | 5   | 0 | seq |
| .....ugGgagagguacggggguucg.....       | 1   | 1 | seq |
| .....ugAgagagguacggggguucg.....       | 2   | 1 | seq |
| .....Ggugagagguacggggguucg.....       | 1   | 1 | seq |
| .....gugagagguacggggguC.....          | 1   | 1 | seq |
| .....gugagaggCacggggguu.....          | 3   | 1 | seq |
| .....gugagagguacggggguu.....          | 1   | 0 | seq |
| .....gugagagguacggggguuc.....         | 7   | 0 | seq |
| .....gGgagagguacggggguuc.....         | 1   | 1 | seq |
| .....gugagaggGacggggguuc.....         | 1   | 1 | seq |
| .....gugagaggCacggggguuc.....         | 2   | 1 | seq |
| .....gugagaUguacggggguuc.....         | 1   | 1 | seq |
| .....gugagaggCacggggguucg.....        | 3   | 1 | seq |
| .....gugagagguacggggguCcg.....        | 1   | 1 | seq |
| .....gugagagguacggggguucg.....        | 4   | 0 | seq |
| .....ugagaggCacggggguuc.....          | 1   | 1 | seq |
| .....ugagaUguacggggguuc.....          | 2   | 1 | seq |
| .....Ggagagguacggggguuc.....          | 1   | 1 | seq |
| .....ugagaggCacggggguucg.....         | 1   | 1 | seq |
| .....ugagagguGcggggguucg.....         | 1   | 1 | seq |
| .....Agagagguacggggguucg.....         | 1   | 1 | seq |
| .....gaUaggguacggggguucg.....         | 1   | 1 | seq |
| .....gagagguacggggguucg.....          | 364 | 0 | seq |
| .....gagagguacggggguuAg.....          | 2   | 1 | seq |
| .....gagagguacggggCucg.....           | 2   | 1 | seq |
| .....gagagguacggggguGcg.....          | 1   | 1 | seq |
| .....Cagagguacggggguucg.....          | 1   | 1 | seq |
| .....gagagguacgAgguuucg.....          | 1   | 1 | seq |
| .....gagagguGcggggguucg.....          | 1   | 1 | seq |
| .....gagagguacggggguCcg.....          | 1   | 1 | seq |
| .....agagguacggggguucgC.....          | 1   | 1 | seq |
| .....agagguacggggguucgG.....          | 1   | 1 | seq |
| .....agagguacggggguucga.....          | 3   | 0 | seq |
| .....agagguacggggguucgau.....         | 1   | 0 | seq |
| .....agagguacggggguucgUuac.....       | 1   | 1 | seq |
| .....gagguacggggguucgaC.....          | 1   | 1 | seq |
| .....gagguacggggguucgUua.....         | 1   | 1 | seq |
| .....gagguacggggguucgUuac.....        | 1   | 1 | seq |
| .....gagguacggggguucgGuacc.....       | 1   | 1 | seq |
| .....gagguacggggguucgUuaccc.....      | 1   | 1 | seq |
| .....agguacggggguucgaAa.....          | 1   | 1 | seq |
| .....gguacggggguucgauaccccgc_auc..... | 1   | 0 | seq |
| .....guacggggguucgUuacccc.....        | 1   | 1 | seq |

Mature

Star

|                                                                         |                    |           |           |            |   |   |     |
|-------------------------------------------------------------------------|--------------------|-----------|-----------|------------|---|---|-----|
| aagaaaaaaaugggagauugggggauguaagucggggguugagcucacgugguagagcucucuuugcaugu | gagaggua           | cgggguucg | auaccccgc | aucucauaag |   |   |     |
| .....                                                                   | .....uacggggguucg  | Guaccccgc | a.....    |            | 1 | 1 | seq |
| .....                                                                   | .....uucgauaccccgc | aucu..... |           |            | 1 | 0 | seq |

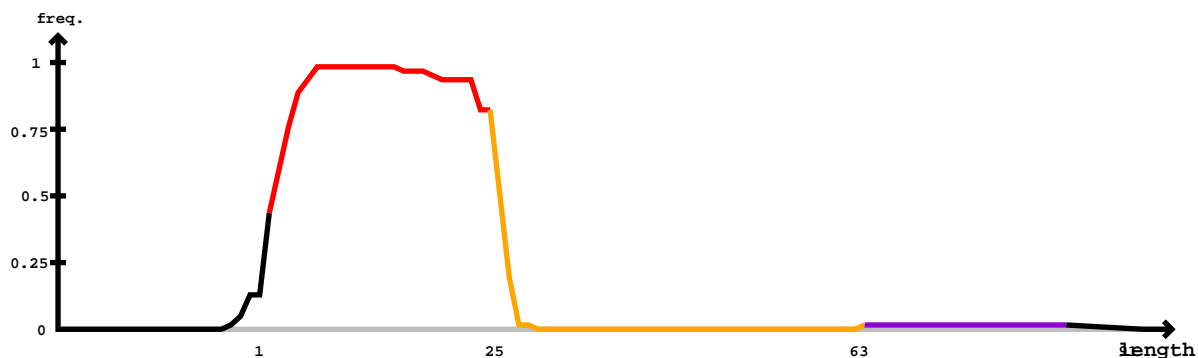

Star

| 5'                                                                                                                          | -3'   | obs |        |
|-----------------------------------------------------------------------------------------------------------------------------|-------|-----|--------|
|                                                                                                                             |       | exp |        |
| uugacauuauugugccaaaaagaguuguauugaauuuauuugauguguuuucuuuuaaaugggagaaagauucucuaauuuaaagaugcauggaagguauuuuucucaaaacaagaauuggc  |       |     |        |
| uugacauuauugugccaaaaagaguuguauugaauuuauuugauguguuuucuuuuaaaugggagaaagauucucuaauuuaaagaugcauggaagguauuuuucucaaaacaaaagauuggc |       |     |        |
| .....((((.....(((.....(((.....((((.....(((.....((((.....))))))))))))))))))))))))))))))))))))))))))))))))))))))))))))        | reads | mm  | sample |
| .....aaUagaguuguauugaauuuauu.....                                                                                           | 1     | 1   | seq    |
| .....aaagaguuguauGgaauu.....                                                                                                | 1     | 1   | seq    |
| .....aUagaguuguauugaauuuauu.....                                                                                            | 1     | 1   | seq    |
| .....Uagaguuguauugaauuuauuugaug.....                                                                                        | 5     | 1   | seq    |
| .....gaguuguauugaauuuauuugaug.....                                                                                          | 1     | 0   | seq    |
| .....gaguuguauugaauuuauuugaugug.....                                                                                        | 14    | 0   | seq    |
| .....gaguuguauugUauuuauuugaugug.....                                                                                        | 1     | 1   | seq    |
| .....gaguuguauugaauuuauuugaugugA.....                                                                                       | 1     | 1   | seq    |
| .....gaguuguauugaauuuauuGgaugug.....                                                                                        | 1     | 1   | seq    |
| .....gaguuguauugaauuuauuugaugGg.....                                                                                        | 1     | 1   | seq    |
| .....aguuguauugaauuuauuugaugug.....                                                                                         | 2     | 0   | seq    |
| .....aguuguauugaauuuauuugauguguu.....                                                                                       | 1     | 0   | seq    |
| .....aguuguauugaauuuauuugaugugC.....                                                                                        | 7     | 1   | seq    |
| .....guuguauugaauuuauuugaugug.....                                                                                          | 1     | 0   | seq    |
| .....guuguauugaauuuauuugaugugCu.....                                                                                        | 9     | 1   | seq    |
| .....uuguauugaauuuauuugaugugA.....                                                                                          | 1     | 1   | seq    |
| .....uuguauugaauuuauuugaugug.....                                                                                           | 7     | 0   | seq    |
| .....uguauugaauuuauuugaugugC.....                                                                                           | 2     | 1   | seq    |
| .....uguauugaauuuauuugaugugCuuc.....                                                                                        | 1     | 1   | seq    |
| .....guauugaauuuauuugaug.....                                                                                               | 1     | 0   | seq    |
| .....guauugaauuuauuugaugugCu.....                                                                                           | 2     | 1   | seq    |
| .....auggaagguauuuuucucaGaca.....                                                                                           | 1     | 1   | seq    |

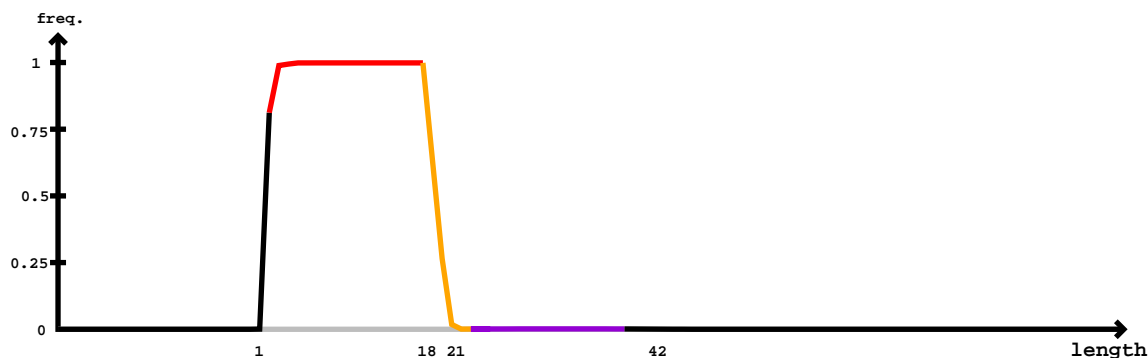

|    |                                                                                                                           |       |       |
|----|---------------------------------------------------------------------------------------------------------------------------|-------|-------|
| 5' | uuuguccauggaguggggcucgugagaagcucccgaaugggagagauuaugggaugacuucacccaagaggacuuagagacuugaugugacccaggcuauccagcu                | -3'   | obs   |
|    | uuuguccauggaguggggcucgugagaagcucccgaaugggagagauuaugggaugacuucacccaagaggacuuagagacuugaugugacccaggcuauccagcu                |       | exp   |
|    | ...((((((( ((((((((((((((((((((.....((((((.....))))))..))) )))))). ..... )))) )(((.....))).. )))).. ))). ..((((.....))).. | reads | mm    |
|    | . . . . . cucgugagaagUucccug . . . . .                                                                                    | 2     | 1 seq |
|    | . . . . . Guccgugagaagcucccug . . . . .                                                                                   | 1     | 1 seq |
|    | . . . . . cucgugagaagUucccuga . . . . .                                                                                   | 1     | 1 seq |
|    | . . . . . ucgugagaagGucccug . . . . .                                                                                     | 3     | 1 seq |
|    | . . . . . ucgugagaagcucccug . . . . .                                                                                     | 8     | 0 seq |
|    | . . . . . ucgugagaagUucccug . . . . .                                                                                     | 3588  | 1 seq |
|    | . . . . . ucgugagaagcucccuA . . . . .                                                                                     | 1     | 1 seq |
|    | . . . . . uUgugagaagcucccug . . . . .                                                                                     | 2     | 1 seq |
|    | . . . . . ucgugagaagAuucccug . . . . .                                                                                    | 2     | 1 seq |
|    | . . . . . ucgugagaagUucccuga . . . . .                                                                                    | 1193  | 1 seq |
|    | . . . . . ucgugagaagAuucccuga . . . . .                                                                                   | 2     | 1 seq |
|    | . . . . . ucgugagaagcucccugG . . . . .                                                                                    | 1     | 1 seq |
|    | . . . . . ucgugagaagcucccuga . . . . .                                                                                    | 2     | 0 seq |
|    | . . . . . ucgugagaagcucccugaa . . . . .                                                                                   | 5     | 0 seq |
|    | . . . . . ucgugagaagUucccugaa . . . . .                                                                                   | 507   | 1 seq |
|    | . . . . . ucgugagaagAuucccugaa . . . . .                                                                                  | 1     | 1 seq |
|    | . . . . . ucgugagaagUucccugaau . . . . .                                                                                  | 6     | 1 seq |
|    | . . . . . ucgugagaagcucccugaaC . . . . .                                                                                  | 1     | 1 seq |
|    | . . . . . cgugagaagcucccuga . . . . .                                                                                     | 4     | 0 seq |
|    | . . . . . cgugagaagcucccugaa . . . . .                                                                                    | 2     | 0 seq |
|    | . . . . . cgugagaagUucccugaa . . . . .                                                                                    | 1108  | 1 seq |
|    | . . . . . cgugagaagUucccugaau . . . . .                                                                                   | 42    | 1 seq |
|    | . . . . . cgugagaagcucccugaaC . . . . .                                                                                   | 3     | 1 seq |
|    | . . . . . gugagaagGucccugaa . . . . .                                                                                     | 1     | 1 seq |
|    | . . . . . gugagaagUucccugaau . . . . .                                                                                    | 35    | 1 seq |
|    | . . . . . ugagaagUucccugaau . . . . .                                                                                     | 28    | 1 seq |
|    | . . . . . agaagcucccugGaugg . . . . .                                                                                     | 1     | 1 seq |
|    | . . . . . augggagagauuGugggaugacu . . . . .                                                                               | 2     | 1 seq |
|    | . . . . . ugggagagaCuauuggga . . . . .                                                                                    | 1     | 1 seq |
|    | . . . . . ggagagaCuauugggaug . . . . .                                                                                    | 1     | 1 seq |
|    | . . . . . ggagagauuGugggaugacu . . . . .                                                                                  | 1     | 1 seq |
|    | . . . . . agagauuGugggaugacu . . . . .                                                                                    | 2     | 1 seq |
|    | . . . . . agaCuauugggaugacu . . . . .                                                                                     | 1     | 1 seq |



MatureStar

uuuguccauggaguggggcucgugagaagcuccugaagggaagagauuauugggaugacuuacaccaagaggacuugagacuugaugugacccaggcuauccagcuaa  
.....gauuGugggaugacuca.....11seq

Provisional ID : MA\_2472094\_41056  
 Score total : 3336.8  
 Score for star read(s) : 3.9  
 Score for read counts : 3334.4  
 Score for mfe : 0.8  
 Score for randfold : -2.2  
 Score for cons. seed :  
 Total read count : 6552  
 Mature read count : 6550  
 Loop read count : 0  
 Star read count : 2

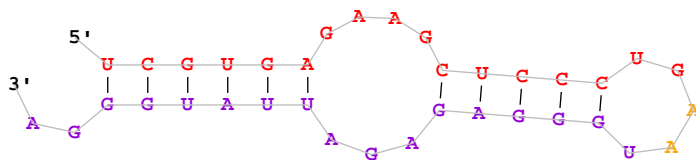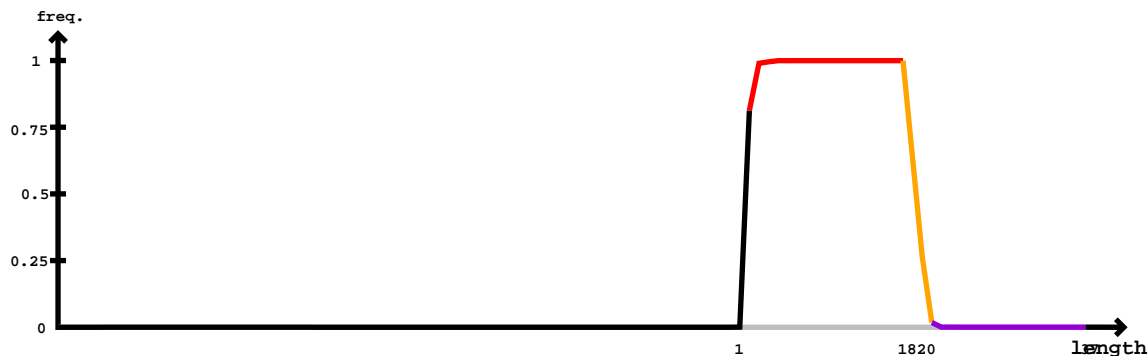

### Mature Star

| 5' -                                                                                                            | obs | reads | mm | sample |
|-----------------------------------------------------------------------------------------------------------------|-----|-------|----|--------|
| cugaguuggugaggacaacguugaaauugcuuacacgaagcaacgagaagauuuuguccauggagugguggcucgugagaagcucccugaaugggagagauuuugggauga | exp |       |    |        |
| cugaguuggugaggacaacguugaaauugcuuacacgaagcaacgagaagauuuuguccauggagugguggcucgugagaagcucccugaaugggagagauuuugggauga |     |       |    |        |
| .(((.(((((((((((.(((.....)))))))))))).)).....((((.....))))(((((((.....((((.....)))))).....))))))....            |     |       |    |        |
| ...aguuggugaggacaacCuugaa.....                                                                                  |     | 1     | 1  | seq    |
| .....cucgugagaagUucccug.....                                                                                    |     | 2     | 1  | seq    |
| .....Gucgugagaagcucccug.....                                                                                    |     | 1     | 1  | seq    |
| .....cucgugagaagUucccuga.....                                                                                   |     | 1     | 1  | seq    |
| .....uUgugagaagcucccug.....                                                                                     |     | 2     | 1  | seq    |
| .....ucgugagaagcucccuA.....                                                                                     |     | 1     | 1  | seq    |
| .....ucgugagaagUucccug.....                                                                                     |     | 3588  | 1  | seq    |
| .....ucgugagaagAucccug.....                                                                                     |     | 2     | 1  | seq    |
| .....ucgugagaagGucccug.....                                                                                     |     | 3     | 1  | seq    |
| .....ucgugagaagcucccug.....                                                                                     |     | 8     | 0  | seq    |
| .....ucgugagaagAucccuga.....                                                                                    |     | 2     | 1  | seq    |
| .....ucgugagaagcucccuga.....                                                                                    |     | 2     | 0  | seq    |
| .....ucgugagaagcucccugG.....                                                                                    |     | 1     | 1  | seq    |
| .....ucgugagaagUucccuga.....                                                                                    |     | 1193  | 1  | seq    |
| .....ucgugagaagAucccugaa.....                                                                                   |     | 1     | 1  | seq    |
| .....ucgugagaagUucccugaa.....                                                                                   |     | 507   | 1  | seq    |
| .....ucgugagaagcucccugaa.....                                                                                   |     | 5     | 0  | seq    |
| .....ucgugagaagcucccugaaC.....                                                                                  |     | 1     | 1  | seq    |
| .....ucgugagaagUucccugaa.....                                                                                   |     | 6     | 1  | seq    |
| .....cgugagaagcucccuga.....                                                                                     |     | 4     | 0  | seq    |
| .....cgugagaagUucccugaa.....                                                                                    |     | 1108  | 1  | seq    |
| .....cgugagaagcucccugaa.....                                                                                    |     | 2     | 0  | seq    |
| .....cgugagaagcucccugaaC.....                                                                                   |     | 3     | 1  | seq    |
| .....cgugagaagUucccugaa.....                                                                                    |     | 42    | 1  | seq    |
| .....gugagaagGucccugaa.....                                                                                     |     | 1     | 1  | seq    |
| .....gugagaagUucccugaa.....                                                                                     |     | 35    | 1  | seq    |
| .....ugagaagUucccugaa.....                                                                                      |     | 28    | 1  | seq    |
| .....agaagcucccugGaugg.....                                                                                     |     | 1     | 1  | seq    |
| .....ugggagagaCuauuggga.....                                                                                    |     | 1     | 1  | seq    |
| .....ggagagaCuauugggaug.....                                                                                    |     | 1     | 1  | seq    |

Provisional ID : MA\_2518465\_40205  
 Score total : 0.2  
 Score for star read(s) : -1.3  
 Score for read counts : 0  
 Score for mfe : 0  
 Score for randfold : 1.6  
 Score for cons. seed :  
 Total read count : 1101  
 Mature read count : 1101  
 Loop read count : 0  
 Star read count : 0

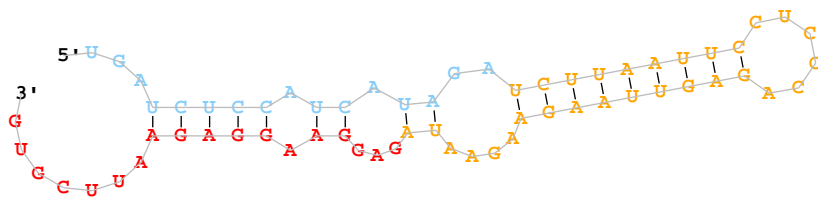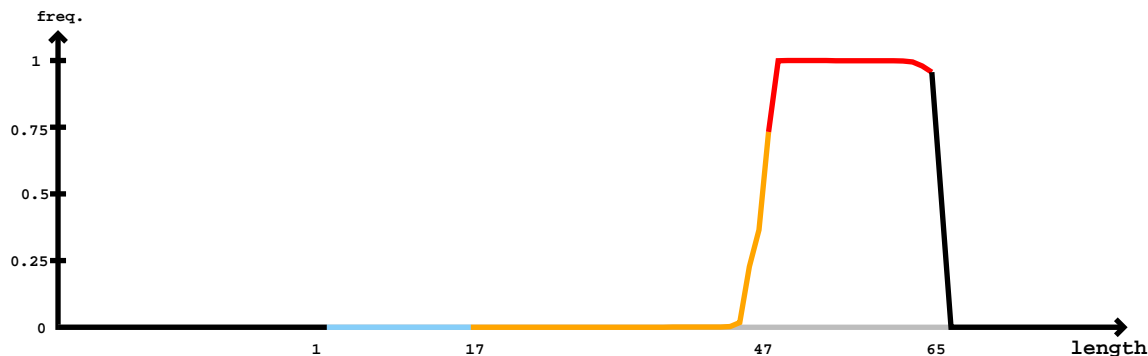

Star

Mature

| 5' -                                                                                                        | exp | reads | mm | sample |
|-------------------------------------------------------------------------------------------------------------|-----|-------|----|--------|
| uugaccaguccaaacagaccugagaugaucuccaucauagauuuuuuuccuccagaguuuagaagaauagaggaaaggagaaucguguuugacuaugacuggagaua | -3' |       |    |        |
| .....(((((((.....))))).(((((((.....)))))).....)))).....                                                     |     | 1     | 1  | seq    |
| .....aagUagaauagagggaag.....                                                                                |     | 1     | 1  | seq    |
| .....aaugaggaaggagaaGucg.....                                                                               |     | 2     | 1  | seq    |
| .....Guagaggaaggagaaau.....                                                                                 |     | 1     | 1  | seq    |
| .....Uuagaggaaggagaaucg.....                                                                                |     | 4     | 1  | seq    |
| .....Uuagaggaaggagaaucgu.....                                                                               |     | 2     | 1  | seq    |
| .....auagaggaaggagaaGucgu.....                                                                              |     | 10    | 1  | seq    |
| .....uagaggaaggagaaCc.....                                                                                  |     | 1     | 1  | seq    |
| .....uagaggaaggagaaauG.....                                                                                 |     | 2     | 1  | seq    |
| .....uagaggaaggagaaCuc.....                                                                                 |     | 1     | 1  | seq    |
| .....uagaggaaggagaaucg.....                                                                                 |     | 7     | 0  | seq    |
| .....uagaggaaggagaaCucg.....                                                                                |     | 2     | 1  | seq    |
| .....uagaggGaggagaaucg.....                                                                                 |     | 1     | 1  | seq    |
| .....uagaggaaggagaaucgC.....                                                                                |     | 1     | 1  | seq    |
| .....uagaggaaggagaaucgu.....                                                                                |     | 5     | 0  | seq    |
| .....uagaggaaggagaaCucgu.....                                                                               |     | 1     | 1  | seq    |
| .....uagaggaaggagaaGucgug.....                                                                              |     | 209   | 1  | seq    |
| .....uagaggaaggagaaucguA.....                                                                               |     | 5     | 1  | seq    |
| .....agaggaaggagaaucg.....                                                                                  |     | 1     | 0  | seq    |
| .....agaggaaggagaaCucgu.....                                                                                |     | 1     | 1  | seq    |
| .....agaggaaggagaaucguA.....                                                                                |     | 3     | 1  | seq    |
| .....agaggaaggagaaGucgug.....                                                                               |     | 147   | 1  | seq    |
| .....agaggaaggagaaGucgugu.....                                                                              |     | 2     | 1  | seq    |
| .....gaggaaggagaaCucgu.....                                                                                 |     | 1     | 1  | seq    |
| .....gaggaaggagaaucgu.....                                                                                  |     | 5     | 0  | seq    |
| .....gaggaaggagaaucguA.....                                                                                 |     | 6     | 1  | seq    |
| .....gaggaaggagaaGucgug.....                                                                                |     | 394   | 1  | seq    |
| .....gaggaaggagaaAucgug.....                                                                                |     | 1     | 1  | seq    |
| .....gaggaaggagaaGucgugu.....                                                                               |     | 5     | 1  | seq    |
| .....aggaaggagaaucguA.....                                                                                  |     | 5     | 1  | seq    |
| .....aggaaggagaaGucgug.....                                                                                 |     | 291   | 1  | seq    |
| .....aggaaggagaaGucgugu.....                                                                                |     | 3     | 1  | seq    |
| .....ggaaggagaaGucgugu.....                                                                                 |     | 1     | 1  | seq    |

[illegible]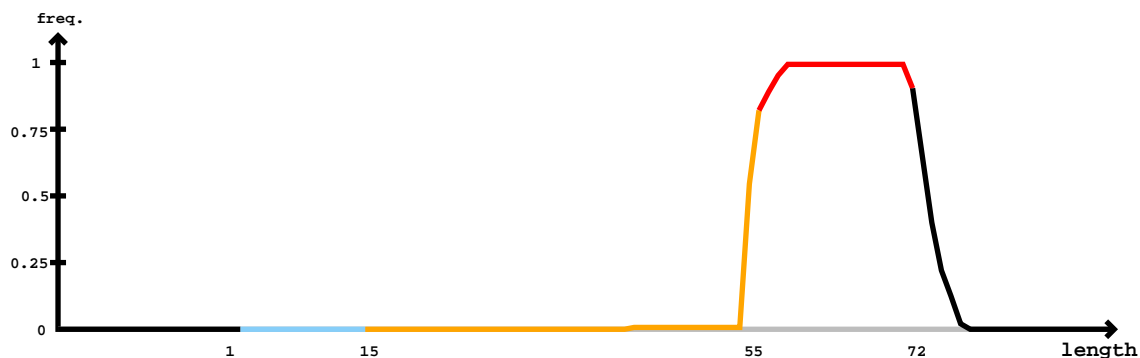

## Mature

[illegible]

The diagram shows a single-stranded RNA molecule. The sequence from 5' to 3' is: U, G, C, A, U, G, G, A, G, G, A, U, G, A, G, C, U, C, U, A, G. The last six nucleotides (A, G, C, U, C, U) are base-paired to form a hairpin loop. There is a bulge of one unpaired nucleotide (G) between the stem and the loop.

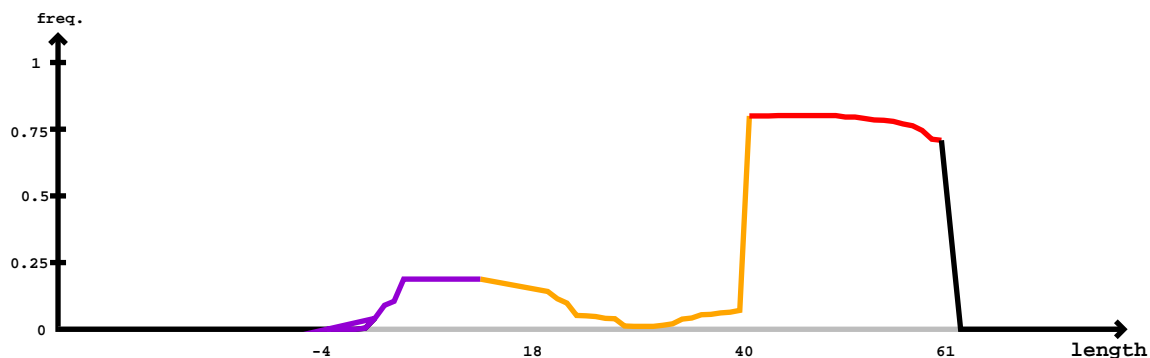

## Mature

[illegible]

Star

## Mature

aaauaaauuaaagucaggucucacuucaucaugaggaugagcucauccacucaaaaacaaaguucuggaugagcucuucucauggugaagucagagcuaucuuuuuu

|                                      |     |   |     |
|--------------------------------------|-----|---|-----|
| Cucuggaugagcucuucucauggug. . . . .   | 2   | 1 | seq |
| .ucuggaugagcucuucuca. . . . .        | 1   | 0 | seq |
| .ucuggaugagcucuucucaCg. . . . .      | 1   | 1 | seq |
| .ucuggaugagcucuucucaCggug. . . . .   | 1   | 1 | seq |
| .cuggaugagcucuucuc. . . . .          | 2   | 0 | seq |
| .cuggaugagcucuucucaC. . . . .        | 1   | 1 | seq |
| .cuggaugagcucuucucaugg. . . . .      | 1   | 0 | seq |
| .cuggaugagcucuucucauggug. . . . .    | 2   | 0 | seq |
| .cuggaugagcucuucucaCggug. . . . .    | 2   | 1 | seq |
| .cuggaugagcucuucucauggugaag. . . . . | 1   | 0 | seq |
| .uggaugagcucuucucaCggug. . . . .     | 1   | 1 | seq |
| .ggaugagcucuucucaCgg. . . . .        | 1   | 1 | seq |
| .ggaugagcucuucucauggugaag. . . . .   | 1   | 0 | seq |
| .ggaugagcucuucucauggugaaC. . . . .   | 2   | 1 | seq |
| .gaugagcucuucucaCgg. . . . .         | 1   | 1 | seq |
| .Aaugagcucuucucauggugaag. . . . .    | 1   | 1 | seq |
| .augagcucuucucaCggug. . . . .        | 1   | 1 | seq |
| .augagcucuucucaCgguga. . . . .       | 4   | 1 | seq |
| .ugagcucuucucaCggu. . . . .          | 2   | 1 | seq |
| .ugagcucuucucaCggug. . . . .         | 3   | 1 | seq |
| .ugagcucuucucauggug. . . . .         | 1   | 0 | seq |
| .Ngagcucuucucaugguga. . . . .        | 1   | 1 | seq |
| .ugagcucuucucaugguga. . . . .        | 9   | 0 | seq |
| .ugagcucuucucaCgguga. . . . .        | 10  | 1 | seq |
| .ugagcucuucucauggugaa. . . . .       | 1   | 0 | seq |
| .ugagcucuucucaCggugaa. . . . .       | 2   | 1 | seq |
| .ugagcucuucCcauggugaag. . . . .      | 3   | 1 | seq |
| .Cgagcucuucucauggugaag. . . . .      | 2   | 1 | seq |
| .ugagcucuucucaCggugaag. . . . .      | 330 | 1 | seq |
| .ugagcucuucucauUgugaag. . . . .      | 1   | 1 | seq |
| .ugagcucuucucauggugaGg. . . . .      | 1   | 1 | seq |
| .ugagcucuucucauggugaAA. . . . .      | 3   | 1 | seq |
| .ugagcucuCcucauggugaag. . . . .      | 1   | 1 | seq |
| .ugGgcucuucucauggugaag. . . . .      | 1   | 1 | seq |
| .ugagcucuucucauggugaaC. . . . .      | 2   | 1 | seq |
| .ugagcucuucucGuggugaag. . . . .      | 1   | 1 | seq |
| .ugagcucuucucauggugaag. . . . .      | 165 | 0 | seq |
| .ugagcucuucucauggugaaU. . . . .      | 1   | 1 | seq |
| .ugagcucuucucauggCgaag. . . . .      | 1   | 1 | seq |
| .ugagcucuucucauggugaagu. . . . .     | 2   | 0 | seq |
| .gcucuucucaCggugaag. . . . .         | 1   | 1 | seq |

Provisional ID : MA\_27253\_12947  
Score total : 263026.6  
Score for star read(s) : 3.9  
Score for read counts : 263027.1  
Score for mfe : -2.1  
Score for randfold : -2.2  
Score for cons. seed :  
Total read count : 515928  
Mature read count : 515437  
Loop read count : 0  
Star read count : 491

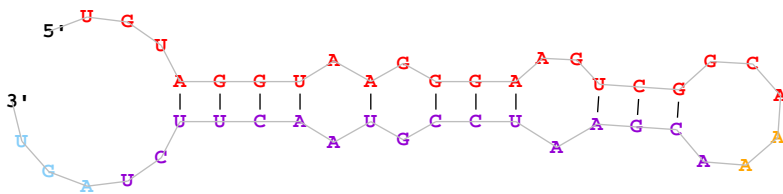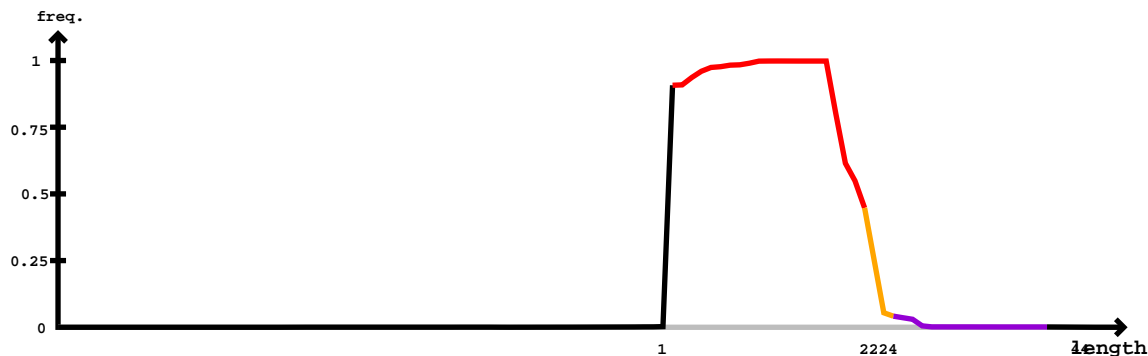

### Mature Star

| 5' -                                                                                        |                        | -3'       | obs      |          |       |
|---------------------------------------------------------------------------------------------|------------------------|-----------|----------|----------|-------|
| cacugaaaaauugaaauuguuucaggucuccaagguaaacagucuuuggucaauagaacau                               | uguagguuaaggggaagucggc | aaacgaauc | cguaacuc | uagugcaa | exp   |
| cacugaaaaauugaaauuguuucaggucuccaagguaaacagucuuuggucaauagaacau                               | uguagguuaaggggaagucggc | aaacgaauc | cguaacuc | uagugcaa |       |
| ..(((((((.....))))))....(((((((.....)))))).....(((((((.....))))))....(((((((.....)))))).... |                        |           |          |          | reads |
| .....Aucaggucuccaaggua.....                                                                 |                        |           |          |          | 2     |
| .....ucaggucuccaagguaa.....                                                                 |                        |           |          |          | 1     |
| .....ucaggucuccaagguaCa.....                                                                |                        |           |          |          | 1     |
| .....ucaggucuccaagguaUaacag.....                                                            |                        |           |          |          | 1     |
| .....ucaggucuccaagguaaacag.....                                                             |                        |           |          |          | 1     |
| .....ucaggucuccaagguaGacag.....                                                             |                        |           |          |          | 1     |
| .....ucaggucuccaagguaGaacagu.....                                                           |                        |           |          |          | 44    |
| .....caggucuccaagguaCaa.....                                                                |                        |           |          |          | 1     |
| .....caggucuccaagguaaaU.....                                                                |                        |           |          |          | 1     |
| .....caggucuccaagguaaacag.....                                                              |                        |           |          |          | 3     |
| .....caggucuccaagguaUaacag.....                                                             |                        |           |          |          | 1     |
| .....caggucuccaagguaCaacag.....                                                             |                        |           |          |          | 2     |
| .....caggucuccaagguaGaacagu.....                                                            |                        |           |          |          | 32    |
| .....caggucuccaagguaGaacaguc.....                                                           |                        |           |          |          | 1     |
| .....aggucuccaagguaUaacag.....                                                              |                        |           |          |          | 2     |
| .....aggucuccaagguaaacag.....                                                               |                        |           |          |          | 2     |
| .....aggucuccaagguaGaacagu.....                                                             |                        |           |          |          | 34    |
| .....aggucuccaagguaGaacaguc.....                                                            |                        |           |          |          | 1     |
| .....ggucuccaagguaGaacagu.....                                                              |                        |           |          |          | 6     |
| .....gucuccaagguaGaacagu.....                                                               |                        |           |          |          | 1     |
| .....ucuccaagguaGaacagu.....                                                                |                        |           |          |          | 3     |
| .....aacagucuCuggucaaua.....                                                                |                        |           |          |          | 2     |
| .....aacagucuCuggucaauagaac.....                                                            |                        |           |          |          | 2     |
| .....acagCcuuuggucaaua.....                                                                 |                        |           |          |          | 1     |
| .....acagCcuuuggucaaua.....                                                                 |                        |           |          |          | 1     |
| .....acagCcuuuggucaauag.....                                                                |                        |           |          |          | 1     |
| .....acagCcuuuggucaauaga.....                                                               |                        |           |          |          | 1     |
| .....acagucuCuggucaauaga.....                                                               |                        |           |          |          | 1     |
| .....acagucuCuggucaauagaac.....                                                             |                        |           |          |          | 4     |
| .....acagCcuuuggucaauagaaca.....                                                            |                        |           |          |          | 5     |
| .....acagucuCuggucaauagaaca.....                                                            |                        |           |          |          | 5     |
| .....cagucuCuggucaauag.....                                                                 |                        |           |          |          | 4     |
| .....cagucuCuggucaauaga.....                                                                |                        |           |          |          | 6     |

# Mature Star

|                                                                |                           |                     |          |
|----------------------------------------------------------------|---------------------------|---------------------|----------|
| cacugaaaaauugaauuuguuucaggucuccaagguaaacagucuuuggucaauagaacau  | uguaagguaaggggaagucggcaaa | acgaauccguaaacuucua | agugcaaa |
| .....cagucuCuggucaauagaac.....                                 | 2                         | 1                   | seq      |
| .....cagucuCuggucaauagaac.....                                 | 2                         | 1                   | seq      |
| .....cagucuCuggucaauagaac.....                                 | 12                        | 1                   | seq      |
| .....cagCcuuuggucaauagaac.....                                 | 2                         | 1                   | seq      |
| .....agCcuuuggucaauagaac.....                                  | 1                         | 1                   | seq      |
| .....agucuCuggucaauagaac.....                                  | 8                         | 1                   | seq      |
| .....agCcuuuggucaauagaac.....                                  | 3                         | 1                   | seq      |
| .....agCcuuuggucaauagaac.....                                  | 4                         | 1                   | seq      |
| .....agucuCuggucaauagaac.....                                  | 4                         | 1                   | seq      |
| .....gucuCuggucaauagaac.....                                   | 1                         | 1                   | seq      |
| .....cuGuggucaauagaac.....                                     | 1                         | 1                   | seq      |
| .....cuuuggucaauagaac.....                                     | 1                         | 0                   | seq      |
| .....cuuuggucaGuagaac.....                                     | 1                         | 1                   | seq      |
| .....cuuuggucaauagaacAguuagguuaggggaagucggcaaa.....            | 1                         | 1                   | seq      |
| .....uuuggucaauagaacAguuagguuaggggaagucggca.....               | 3                         | 1                   | seq      |
| .....uggucaauagaacAGug.....                                    | 12                        | 1                   | seq      |
| .....uAgucaauagaacauug.....                                    | 1                         | 1                   | seq      |
| .....uggucaauagaacauug.....                                    | 8                         | 0                   | seq      |
| .....uggucaauagaacAGugu.....                                   | 2                         | 1                   | seq      |
| .....uggucaauagaacAGugua.....                                  | 1                         | 1                   | seq      |
| .....uggucaauagaacAGuguag.....                                 | 1                         | 1                   | seq      |
| .....uggucaauagaacAGuguagg.....                                | 4                         | 1                   | seq      |
| .....uggucaauagaacAGuguaggua.....                              | 1                         | 1                   | seq      |
| .....uggucaauagaacAGuguaggua.....                              | 1                         | 1                   | seq      |
| .....uggucaauagaacAGuguagguaagggaa.....                        | 1                         | 1                   | seq      |
| .....uggucaauagaacauuguuagguuaggggaagucg.....                  | 1                         | 0                   | seq      |
| .....uggucaauagaacAGuguuagguuaggggaagucggc.....                | 1                         | 1                   | seq      |
| .....uggucaauagaacAGuguuagguuaggggaagucggca.....               | 1                         | 1                   | seq      |
| .....uggucaauagaacAGuguuagguuaggggaagucggca.....               | 1                         | 1                   | seq      |
| .....uggucaauagaacAGuguuagguuaggggaagucggca.....               | 1                         | 1                   | seq      |
| .....uggucaauagaacAGuguuagguuaggggaagucggcaaa.....             | 1                         | 1                   | seq      |
| .....uggucaauagaacAguuagguuaggggaagucggcaaaacga.....           | 6                         | 1                   | seq      |
| .....ggucaauagaacAGugu.....                                    | 1                         | 1                   | seq      |
| .....ggucaauagaacauugua.....                                   | 1                         | 0                   | seq      |
| .....ggucaauagaacAGuguagg.....                                 | 1                         | 1                   | seq      |
| .....ggucaauagaacAGuguagg.....                                 | 1                         | 1                   | seq      |
| .....ggucaauagaacAGuguaggua.....                               | 1                         | 1                   | seq      |
| .....ggucaauagaacauuguuagguG.....                              | 1                         | 1                   | seq      |
| .....ggucaauagaacauuguuagguu.....                              | 2                         | 0                   | seq      |
| .....ggucaauagaacAGuguuagguuaggggaagucg.....                   | 1                         | 1                   | seq      |
| .....ggucaauagaacAGuguuagguuaggggaagucggc.....                 | 3                         | 1                   | seq      |
| .....ggucaauagaacAGuguuagguuaggggaagucggca.....                | 2                         | 1                   | seq      |
| .....ggucaauagaacAguuagguuaggggaagucggcaaaacga.....            | 3                         | 1                   | seq      |
| .....ggucaauagaacauuguuagguuaggggaagucggcaaaacgGauccguaac..... | 1                         | 1                   | seq      |
| .....gucaauagaacAGuguagg.....                                  | 1                         | 1                   | seq      |
| .....gucaauagaacAGuguaggua.....                                | 4                         | 1                   | seq      |
| .....gucaauagaacauuguuagguu.....                               | 1                         | 0                   | seq      |
| .....gucaauagaacAGuguagguaag.....                              | 1                         | 1                   | seq      |
| .....gucaauagaacAGuguagguaaggg.....                            | 1                         | 1                   | seq      |
| .....gucaauagaacAGuguagguaagggga.....                          | 2                         | 1                   | seq      |
| .....gucaauagaacAGuguagguaaggggaagucggc.....                   | 1                         | 1                   | seq      |
| .....gucaauagaacAGuguagguaaggggaagucggca.....                  | 1                         | 1                   | seq      |
| .....gucaauagaacauuguuagguuaggggaagucggca.....                 | 1                         | 0                   | seq      |
| .....gucaauagaacAguuagguuaggggaagucggcaaaacga.....             | 5                         | 1                   | seq      |
| .....gucaauagaacauuguuagguuaggggaagucggcaaaacgGauccgua.....    | 1                         | 1                   | seq      |
| .....ucaauagaacAGuguagg.....                                   | 2                         | 1                   | seq      |
| .....ucaauagaacAGuguaggua.....                                 | 3                         | 1                   | seq      |
| .....ucaauagaacAGuguagguaag.....                               | 3                         | 1                   | seq      |
| .....ucaauagaacAGuguagguaaggg.....                             | 2                         | 1                   | seq      |
| .....ucaauagaacauuguuagguuaggg.....                            | 1                         | 0                   | seq      |
| .....ucaauagaacAGuguagguaaggggaag.....                         | 1                         | 1                   | seq      |
| .....ucaauagaacAGuguagguaaggggaagucg.....                      | 3                         | 1                   | seq      |
| .....ucaauagaacAGuguagguaaggggaagucgg.....                     | 1                         | 1                   | seq      |
| .....ucaauagaacAGuguagguaaggggaagucggc.....                    | 2                         | 1                   | seq      |
| .....ucaauagaacauuguuagguuaggggaagucggc.....                   | 2                         | 0                   | seq      |
| .....ucaGuagaacauuguuagguuaggggaagucggca.....                  | 1                         | 1                   | seq      |
| .....ucaauagaacAGuguagguaaggggaagucggca.....                   | 1                         | 1                   | seq      |
| .....ucaauagaacAguuagguuaggggaagucggcaaaacga.....              | 8                         | 1                   | seq      |
| .....caauagaacAGuguagg.....                                    | 2                         | 1                   | seq      |
| .....caauagaacauuguuaggC.....                                  | 1                         | 1                   | seq      |



# Mature Star

|                                                                                                                        |    |   |     |
|------------------------------------------------------------------------------------------------------------------------|----|---|-----|
| cacugaaaaauugaauuuguuucaggucuccaagguaaacagucuuuggucaauagaacau <u>uguagguaaggggaagucggcaaaacgaauccguaacuucua</u> gugcaa |    |   |     |
| .....cauagaacaGuguaggua.....                                                                                           | 2  | 1 | seq |
| .....cauagaacaGuguagguaa.....                                                                                          | 2  | 1 | seq |
| .....cauagaacaGuguagguaag.....                                                                                         | 1  | 1 | seq |
| .....cauagaacaGuguagguaagg.....                                                                                        | 1  | 1 | seq |
| .....cauagaacaGuguagguaagg.....                                                                                        | 1  | 1 | seq |
| .....cauagaacaGuguagguaagg.....                                                                                        | 2  | 1 | seq |
| .....cauagaacaGuguagguaagggaagucg.....                                                                                 | 2  | 1 | seq |
| .....cauagaacaGuguagguaagggaagucgg.....                                                                                | 1  | 1 | seq |
| .....cauagaacaGuguagguaagggaagucggc.....                                                                               | 2  | 1 | seq |
| .....cauagaacaGuguagguaagggaagucggca.....                                                                              | 1  | 1 | seq |
| .....cauagaacaGuguagguaagggaagucggcaaaacg.....                                                                         | 1  | 1 | seq |
| .....cauagaacaGuguagguaagggaagucggcaaaacga.....                                                                        | 9  | 1 | seq |
| .....auagaacaGuguaggua.....                                                                                            | 1  | 1 | seq |
| .....auagaacaGuguaggua.....                                                                                            | 5  | 1 | seq |
| .....auagaacaGuguagguaa.....                                                                                           | 1  | 1 | seq |
| .....auagaacaGuguagguaag.....                                                                                          | 1  | 1 | seq |
| .....auagaacaGuguagguaagg.....                                                                                         | 1  | 1 | seq |
| .....auagaacaGuguagguaagg.....                                                                                         | 2  | 1 | seq |
| .....auagaacaGuguagguaaggga.....                                                                                       | 2  | 0 | seq |
| .....auagaacaGuguagguaaggga.....                                                                                       | 1  | 1 | seq |
| .....auagaacaGuguagguaagggaaguc.....                                                                                   | 2  | 1 | seq |
| .....auagaacaGuguagguaagggaaguc.....                                                                                   | 1  | 0 | seq |
| .....auagaacaGuguagguaagggaagucg.....                                                                                  | 1  | 1 | seq |
| .....auagaacaGuguagguaagggaagucggc.....                                                                                | 1  | 1 | seq |
| .....auagaacaGuguagguaagggaagucggca.....                                                                               | 2  | 1 | seq |
| .....auagaacaGuguagguaagggaagucggcaaaacga.....                                                                         | 5  | 1 | seq |
| .....auagaacaGuguagguaagggaagucggcaaaacgcu.....                                                                        | 1  | 1 | seq |
| .....auagaacaGuguaggua.....                                                                                            | 2  | 0 | seq |
| .....auagaacaGuguaggua.....                                                                                            | 1  | 1 | seq |
| .....auagaacaGuguaggua.....                                                                                            | 10 | 1 | seq |
| .....auagaacaGuguagguaa.....                                                                                           | 2  | 1 | seq |
| .....auagaacaGuguagguaag.....                                                                                          | 2  | 1 | seq |
| .....auagaacaGuguagguaagg.....                                                                                         | 1  | 1 | seq |
| .....auagaacaGuguagguaagg.....                                                                                         | 5  | 1 | seq |
| .....auagaacaGuguagguaaggga.....                                                                                       | 4  | 1 | seq |
| .....auagaacaGuguagguaaggga.....                                                                                       | 1  | 0 | seq |
| .....auagaacaGuguagguaaggga.....                                                                                       | 1  | 0 | seq |
| .....auagaacaGuguagguaagggaag.....                                                                                     | 2  | 1 | seq |
| .....auagaacaGuguagguaagggaaguc.....                                                                                   | 3  | 1 | seq |
| .....auagaacaGuguagguaagggaaguc.....                                                                                   | 1  | 1 | seq |
| .....auagaacaGuguagguaagggaagucg.....                                                                                  | 4  | 1 | seq |
| .....auagaacaGuguagguaagggaagucgg.....                                                                                 | 2  | 1 | seq |
| .....auagaacaGuguagguaagggaagucggcaaa.....                                                                             | 1  | 1 | seq |
| .....auagaacaGuguagguaagggaagucggcaaaac.....                                                                           | 1  | 1 | seq |
| .....auagaacaGuguagguaagggaagucggcaaaacga.....                                                                         | 24 | 1 | seq |
| .....auagaacaGuguagguaagggaagucggcaaaacgaa.....                                                                        | 1  | 1 | seq |
| .....uagaacaGuguagguaa.....                                                                                            | 3  | 1 | seq |
| .....uagaacaGuguagguaag.....                                                                                           | 4  | 1 | seq |
| .....uagaacaGuguagguaag.....                                                                                           | 1  | 0 | seq |
| .....uagaacaGuguagguaag.....                                                                                           | 6  | 1 | seq |
| .....uagaacaGuguagguaagg.....                                                                                          | 1  | 0 | seq |
| .....uagaacaGuguagguaagg.....                                                                                          | 10 | 1 | seq |
| .....uagaacaGuguagguaaggga.....                                                                                        | 9  | 1 | seq |
| .....uagaacaGuguagguaaggga.....                                                                                        | 2  | 1 | seq |
| .....uagaacaGuguagguaaggga.....                                                                                        | 1  | 1 | seq |
| .....uagaacaGuguagguaagggaag.....                                                                                      | 1  | 1 | seq |
| .....uagaacaGuguagguaagggaaguc.....                                                                                    | 4  | 1 | seq |
| .....uagaacaGuguagguaagggaagucg.....                                                                                   | 2  | 1 | seq |
| .....uagaacaGuguagguaagggaagucggU.....                                                                                 | 1  | 1 | seq |
| .....uagaacaGuguagguaagggaagucggc.....                                                                                 | 1  | 1 | seq |
| .....uagaacaGuguagguaagggaagucggc.....                                                                                 | 1  | 1 | seq |
| .....uagaacaGuguagguaagggaagucggca.....                                                                                | 2  | 1 | seq |
| .....uagaacaGuguagguaagggaagucggca.....                                                                                | 1  | 0 | seq |
| .....uagaacaGuguagguaagggaagucggcaa.....                                                                               | 1  | 1 | seq |
| .....uagaacaGuguagguaagggaagucggcaaa.....                                                                              | 1  | 1 | seq |
| .....uagaacaGuguagguaagggaagucggcaaaacg.....                                                                           | 1  | 0 | seq |
| .....uagaacaGuguagguaagggaagucggcaaaacg.....                                                                           | 1  | 1 | seq |
| .....uagaacaGuguagguaagggaagucggcaaaacga.....                                                                          | 17 | 1 | seq |
| .....agaacaGuguagguaagg.....                                                                                           | 2  | 1 | seq |
| .....agaacaGuguagguaagg.....                                                                                           | 1  | 0 | seq |

# Mature Star

|                                                                                                                         |    |   |     |
|-------------------------------------------------------------------------------------------------------------------------|----|---|-----|
| cacugaaaaauugaauuuguuuucaggucuccaagguaaacagucuuuuggucaauagaacauu <u>guagguaaggggaagucggcaaaacgaauccguaacuucuagugcaa</u> |    |   |     |
| .....agaacaGuguagguuaaggg.....                                                                                          | 2  | 1 | seq |
| .....agaacaCuguagguuaaggg.....                                                                                          | 1  | 1 | seq |
| .....agaacaGuguagguuaagggga.....                                                                                        | 3  | 1 | seq |
| .....agaacaGuguagguuaaggggaag.....                                                                                      | 1  | 1 | seq |
| .....agaacaCuguagguuaaggggaagu.....                                                                                     | 1  | 1 | seq |
| .....agUacauuuguaagguuaaggggaagu.....                                                                                   | 1  | 1 | seq |
| .....agaacaGuguagguuaaggggaaguc.....                                                                                    | 1  | 1 | seq |
| .....agaacaGuguagguuaaggggaagucg.....                                                                                   | 1  | 1 | seq |
| .....agaacaGuguagguuaaggggaagucggca.....                                                                                | 1  | 1 | seq |
| .....agaacaGuguagguuaaggggaagucggcaaaacg.....                                                                           | 1  | 1 | seq |
| .....agaacaAguagguuaaggggaagucggcaaaacga.....                                                                           | 7  | 1 | seq |
| .....agaacaGuguagguuaaggggaagucggcaaaacga.....                                                                          | 1  | 1 | seq |
| .....gaacaGuguagguuaaggg.....                                                                                           | 5  | 1 | seq |
| .....gaacauuuguaagguuaaggg.....                                                                                         | 1  | 0 | seq |
| .....gaacaGuguagguuaagggg.....                                                                                          | 4  | 1 | seq |
| .....gaacauuuguaagguuaagggga.....                                                                                       | 1  | 0 | seq |
| .....gaacaGuguagguuaagggga.....                                                                                         | 4  | 1 | seq |
| .....gaacaGuguagguuaaggggaa.....                                                                                        | 1  | 1 | seq |
| .....gaacauuuguaagguuaagggCa.....                                                                                       | 1  | 1 | seq |
| .....gaacaGuguagguuaaggggaag.....                                                                                       | 3  | 1 | seq |
| .....gaacaGuguagguuaaggggaaguc.....                                                                                     | 4  | 1 | seq |
| .....gaacaGuguagguuaaggggaagucg.....                                                                                    | 3  | 1 | seq |
| .....gaacaGuguagguuaaggggaagucgg.....                                                                                   | 2  | 1 | seq |
| .....gaacaGuguagguuaaggggaagucggc.....                                                                                  | 2  | 1 | seq |
| .....gaacauuuguaagguuaaggggaagucggc.....                                                                                | 1  | 0 | seq |
| .....gaacauuuguaagguuaaggggaagucggca.....                                                                               | 1  | 0 | seq |
| .....gaacaGuguagguuaaggggaagucggca.....                                                                                 | 3  | 1 | seq |
| .....gaacaCuguagguuaaggggaagucggca.....                                                                                 | 1  | 1 | seq |
| .....gaacaAguagguuaaggggaagucggcaaaacga.....                                                                            | 11 | 1 | seq |
| .....gaacauuuguaagguuaaggggaagucggcaaaacgGauccgu.....                                                                   | 1  | 1 | seq |
| .....gaacauuuguaagguuaaggggaagucggcaaaacgGauccgua.....                                                                  | 1  | 1 | seq |
| .....aacaauuuguaagguuaaggg.....                                                                                         | 1  | 0 | seq |
| .....aacaGuguagguuaaggg.....                                                                                            | 1  | 1 | seq |
| .....aacaGuguagguuaagggga.....                                                                                          | 10 | 1 | seq |
| .....aacaCuguagguuaagggga.....                                                                                          | 1  | 1 | seq |
| .....aacaGuguagguuaaggggaa.....                                                                                         | 1  | 1 | seq |
| .....aacaCuguagguuaaggggaag.....                                                                                        | 1  | 1 | seq |
| .....aacaGuguagguuaaggggaag.....                                                                                        | 1  | 1 | seq |
| .....aacaGuguagguuaaggggaaguc.....                                                                                      | 1  | 1 | seq |
| .....aacaGuguagguuaaggggaagucg.....                                                                                     | 3  | 1 | seq |
| .....aacaauuuguaagguuaaggggaagucg.....                                                                                  | 1  | 0 | seq |
| .....aacaGuguagguuaaggggaagucgg.....                                                                                    | 2  | 1 | seq |
| .....aacaGuguagguuaaggggaagucggca.....                                                                                  | 4  | 1 | seq |
| .....aacaGuguagguuaaggggaagucggcaa.....                                                                                 | 1  | 1 | seq |
| .....aacaGuguagguuaaggggaagucggcaaa.....                                                                                | 1  | 1 | seq |
| .....aacaGuguagguuaaggggaagucggcaaaacg.....                                                                             | 1  | 1 | seq |
| .....aacaauuuguaagguuaaggggaagucggcaaaacgG.....                                                                         | 1  | 1 | seq |
| .....aacaAguagguuaaggggaagucggcaaaacga.....                                                                             | 15 | 1 | seq |
| .....aacaAguagguuaaggggaagucggcaaaacgaa.....                                                                            | 1  | 1 | seq |
| .....acaauuuguaagguuaagggga.....                                                                                        | 5  | 0 | seq |
| .....acaGuguagguuaagggga.....                                                                                           | 9  | 1 | seq |
| .....acaCuguagguuaagggga.....                                                                                           | 1  | 1 | seq |
| .....acaGuguagguuaaggggaa.....                                                                                          | 1  | 1 | seq |
| .....acaauuuguaagguuaaggggaag.....                                                                                      | 1  | 0 | seq |
| .....acaGuguagguuaaggggaag.....                                                                                         | 1  | 1 | seq |
| .....acaGuguagguuaaggggaaguc.....                                                                                       | 3  | 1 | seq |
| .....acaauuuguaagguuaaggggaaguc.....                                                                                    | 2  | 0 | seq |
| .....acaGuguagguuaaggggaagucg.....                                                                                      | 11 | 1 | seq |
| .....acaCuguagguuaaggggaagucg.....                                                                                      | 1  | 1 | seq |
| .....acaauuuguaagguuaaggggaagucg.....                                                                                   | 3  | 0 | seq |
| .....acaauuuguaagguuaaggggaagucgg.....                                                                                  | 1  | 0 | seq |
| .....acaGuguagguuaaggggaagucgg.....                                                                                     | 3  | 1 | seq |
| .....acaGuguagguuaaggggaagucggc.....                                                                                    | 5  | 1 | seq |
| .....acaCuguagguuaaggggaagucggc.....                                                                                    | 1  | 1 | seq |
| .....acaauuuguaagguuaaggggaagucggc.....                                                                                 | 3  | 0 | seq |
| .....acaGuguagguuaaggggaagucggca.....                                                                                   | 8  | 1 | seq |
| .....acaauuuguaagguuaaggggaUgucggca.....                                                                                | 1  | 1 | seq |
| .....acaauuuguaagguuaaggggaagucggca.....                                                                                | 3  | 0 | seq |
| .....acaGuguagguuaaggggaagucggcaa.....                                                                                  | 1  | 1 | seq |

# Mature Star

|                                                                                                                                   |    |   |     |
|-----------------------------------------------------------------------------------------------------------------------------------|----|---|-----|
| cacugaaaaauugaauuuguuucagggucuccaagguaaacagucuuugggucaaauagaacau <u>uguagguaaggggaagucggcaaa</u> acgaauccguaacuucua <u>gugcaa</u> |    |   |     |
| .....acauuguagguaaggggaagucggcaaaa.....                                                                                           | 1  | 0 | seq |
| .....acauuguagguaaggggaagucggcaaaa.....                                                                                           | 1  | 0 | seq |
| .....acaGuagguaaggggaagucggcaaaaac.....                                                                                           | 1  | 1 | seq |
| .....acaAuguagguaaggggaagucggcaaaaacga.....                                                                                       | 24 | 1 | seq |
| .....acauuguagguaaggggaagucggcaaaaacgGa.....                                                                                      | 1  | 1 | seq |
| .....acaAuguagguaaggggaagucggcaaaaacgaauccgu.....                                                                                 | 1  | 1 | seq |
| .....caGuagguaaggggaa.....                                                                                                        | 6  | 1 | seq |
| .....cauuguagguaaggggaa.....                                                                                                      | 1  | 0 | seq |
| .....cauuguagguaaggggaa.....                                                                                                      | 3  | 0 | seq |
| .....caGuagguaaggggaag.....                                                                                                       | 4  | 1 | seq |
| .....caGuagguaaggggaagu.....                                                                                                      | 3  | 1 | seq |
| .....caGuagguaaggggaaguc.....                                                                                                     | 15 | 1 | seq |
| .....caCuagguaaggggaaguc.....                                                                                                     | 2  | 1 | seq |
| .....cauuguagguaaggggaaguc.....                                                                                                   | 4  | 0 | seq |
| .....caGuagguaaggggaagucg.....                                                                                                    | 19 | 1 | seq |
| .....cauuguagguaaggggaagucU.....                                                                                                  | 1  | 1 | seq |
| .....caCuagguaaggggaagucg.....                                                                                                    | 3  | 1 | seq |
| .....caCuagguaaggggaagucgg.....                                                                                                   | 1  | 1 | seq |
| .....cauuguagguaaggggaagucgg.....                                                                                                 | 1  | 0 | seq |
| .....caGuagguaaggggaagucgg.....                                                                                                   | 4  | 1 | seq |
| .....caCuagguaaggggaagucggc.....                                                                                                  | 1  | 1 | seq |
| .....caGuagguaaggggaagucggc.....                                                                                                  | 6  | 1 | seq |
| .....cauuguagguaaggggaagucggU.....                                                                                                | 1  | 1 | seq |
| .....cauuguagguaaggggaagucggc.....                                                                                                | 2  | 0 | seq |
| .....caGuagguaaggggaagucggca.....                                                                                                 | 18 | 1 | seq |
| .....cauuguagguaaggggaagucggca.....                                                                                               | 3  | 0 | seq |
| .....caCuagguaaggggaagucggca.....                                                                                                 | 1  | 1 | seq |
| .....caGuagguaaggggaagucggcaaa.....                                                                                               | 2  | 1 | seq |
| .....caAuguagguaaggggaagucggcaaaaacga.....                                                                                        | 51 | 1 | seq |
| .....caAuguagguaaggggaagucggcaaaaacgaaucc.....                                                                                    | 1  | 1 | seq |
| .....cauuguagguaaggggaagucggcaaaaacgGauccg.....                                                                                   | 1  | 1 | seq |
| .....caAuguagguaaggggaagucggcaaaaacgaauccgu.....                                                                                  | 1  | 1 | seq |
| .....caAuguagguaaggggaagucggcaaaaacgaauccgua.....                                                                                 | 2  | 1 | seq |
| .....aGuagguaaggggaag.....                                                                                                        | 1  | 1 | seq |
| .....auuguagguaaggggaagu.....                                                                                                     | 1  | 0 | seq |
| .....Guuguagguaaggggaagu.....                                                                                                     | 1  | 1 | seq |
| .....auuguGgguaggggaagu.....                                                                                                      | 1  | 1 | seq |
| .....auuguagguaaggggaaguc.....                                                                                                    | 3  | 0 | seq |
| .....Guuguagguaaggggaaguc.....                                                                                                    | 1  | 1 | seq |
| .....aGuagguaaggggaaguc.....                                                                                                      | 6  | 1 | seq |
| .....aCuagguaaggggaagucg.....                                                                                                     | 2  | 1 | seq |
| .....auuguagguaaggggaagucg.....                                                                                                   | 2  | 0 | seq |
| .....aGuagguaaggggaagucg.....                                                                                                     | 8  | 1 | seq |
| .....aGuagguaaggggaagucggc.....                                                                                                   | 5  | 1 | seq |
| .....auuguagguaaggggaagucggc.....                                                                                                 | 1  | 0 | seq |
| .....aGuagguaaggggaagucggca.....                                                                                                  | 3  | 1 | seq |
| .....auuguagguaaggggaagucggca.....                                                                                                | 5  | 0 | seq |
| .....aCuagguaaggggaagucggca.....                                                                                                  | 1  | 1 | seq |
| .....Uuuguagguaaggggaagucggca.....                                                                                                | 1  | 1 | seq |
| .....aGuagguaaggggaagucggcaaa.....                                                                                                | 1  | 1 | seq |
| .....auuguagguaaggggaagucggcaaa.....                                                                                              | 1  | 0 | seq |
| .....aGuagguaaggggaagucggcaaaa.....                                                                                               | 1  | 1 | seq |
| .....aCuagguaaggggaagucggcaaaaacg.....                                                                                            | 1  | 1 | seq |
| .....aGuagguaaggggaagucggcaaaaacga.....                                                                                           | 1  | 1 | seq |
| .....auuguagguaaggggaagucggcaaaaacgG.....                                                                                         | 1  | 1 | seq |
| .....aAuguagguaaggggaagucggcaaaaacga.....                                                                                         | 18 | 1 | seq |
| .....auuguagguaaggggaagucggcaaaaacgGa.....                                                                                        | 1  | 1 | seq |
| .....Nuguagguaaggggaagu.....                                                                                                      | 1  | 1 | seq |
| .....Cuagguaaggggaaguc.....                                                                                                       | 19 | 1 | seq |
| .....uuguagguaaggggaaguc.....                                                                                                     | 11 | 0 | seq |
| .....Nuguagguaaggggaaguc.....                                                                                                     | 19 | 1 | seq |
| .....Nuguagguaaggggaagucg.....                                                                                                    | 21 | 1 | seq |
| .....uuguagguaaggggaagucg.....                                                                                                    | 15 | 0 | seq |
| .....Guagguaaggggaagucg.....                                                                                                      | 57 | 1 | seq |
| .....Cuagguaaggggaagucg.....                                                                                                      | 21 | 1 | seq |
| .....Cuagguaaggggaagucgg.....                                                                                                     | 5  | 1 | seq |
| .....uuguagguaaggggaagucgg.....                                                                                                   | 7  | 0 | seq |
| .....Nuguagguaaggggaagucgg.....                                                                                                   | 6  | 1 | seq |

# Mature Star

|                                                                |                                                     |   |     |  |
|----------------------------------------------------------------|-----------------------------------------------------|---|-----|--|
| cacugaaaaauugaauuuguuuucaggucuccaagguaaacagucuuuggucaauagaacau | uguaagguaaggggaagucggcaaaacgaauccguaaacuucuaugugcaa |   |     |  |
| .....Guguagguaaggggaagucggg.....                               | 16                                                  | 1 | seq |  |
| .....Cuguagguaaggggaagucgggc.....                              | 14                                                  | 1 | seq |  |
| .....Nuguagguaaggggaagucgggc.....                              | 9                                                   | 1 | seq |  |
| .....uGguagguaaggggaagucgggc.....                              | 1                                                   | 1 | seq |  |
| .....uuguagguaaggggaagucgggc.....                              | 7                                                   | 0 | seq |  |
| .....Guguagguaaggggaagucgggc.....                              | 33                                                  | 1 | seq |  |
| .....Nuguagguaaggggaagucgggca.....                             | 22                                                  | 1 | seq |  |
| .....uuguagguaaggggaagucgggca.....                             | 18                                                  | 0 | seq |  |
| .....uGguagguaaggggaagucgggca.....                             | 2                                                   | 1 | seq |  |
| .....Cuguagguaaggggaagucgggca.....                             | 31                                                  | 1 | seq |  |
| .....Guguagguaaggggaagucgggca.....                             | 93                                                  | 1 | seq |  |
| .....Nuguagguaaggggaagucgggcaa.....                            | 4                                                   | 1 | seq |  |
| .....Cuguagguaaggggaagucgggcaa.....                            | 1                                                   | 1 | seq |  |
| .....Guguagguaaggggaagucgggcaa.....                            | 4                                                   | 1 | seq |  |
| .....uGguagguaaggggaagucgggcaa.....                            | 1                                                   | 1 | seq |  |
| .....Guguagguaaggggaagucgggcaaaa.....                          | 1                                                   | 1 | seq |  |
| .....uuguagguaaggggaagucgggcaaaa.....                          | 1                                                   | 0 | seq |  |
| .....Cuguagguaaggggaagucgggcaaaa.....                          | 2                                                   | 1 | seq |  |
| .....Cuguagguaaggggaagucgggcaaaa.....                          | 1                                                   | 1 | seq |  |
| .....Guguagguaaggggaagucgggcaaaa.....                          | 2                                                   | 1 | seq |  |
| .....Cuguagguaaggggaagucgggcaaaaac.....                        | 1                                                   | 1 | seq |  |
| .....Guguagguaaggggaagucgggcaaaaac.....                        | 1                                                   | 1 | seq |  |
| .....Guguagguaaggggaagucgggcaaaaacg.....                       | 1                                                   | 1 | seq |  |
| .....Nuguagguaaggggaagucgggcaaaaacg.....                       | 1                                                   | 1 | seq |  |
| .....uuguagguaaggggaagucgggcaaaaacgG.....                      | 2                                                   | 1 | seq |  |
| .....Auguagguaaggggaagucgggcaaaaacga.....                      | 58                                                  | 1 | seq |  |
| .....Auguagguaaggggaagucgggcaaaaacgaa.....                     | 1                                                   | 1 | seq |  |
| .....Auguagguaaggggaagucgggcaaaaacgaaaucc.....                 | 1                                                   | 1 | seq |  |
| .....uuguagguaaggggaagucgggcaaaaacgGauccg.....                 | 2                                                   | 1 | seq |  |
| .....uuguagguaaggggaagucgggcaaaaacgGauccggu.....               | 1                                                   | 1 | seq |  |
| .....uuguagguaaggggaagucgggcaaaaacgGauccggu.....               | 3                                                   | 1 | seq |  |
| .....uuguagguaaggggaagucgggcaaaaacgGauccgguaac.....            | 1                                                   | 1 | seq |  |
| .....uuguagguaaggggaagucgggcaaaaacgGauccgguaacuu.....          | 1                                                   | 1 | seq |  |
| .....uguagguaCggggaaguc.....                                   | 17                                                  | 1 | seq |  |
| .....uguagguaaCgggaaguc.....                                   | 6                                                   | 1 | seq |  |
| .....uguagguaagUgaaguc.....                                    | 17                                                  | 1 | seq |  |
| .....uguagguaaggggaaguc.....                                   | 100865                                              | 0 | seq |  |
| .....uguagguaagCgaaguc.....                                    | 18                                                  | 1 | seq |  |
| .....ugGagguaaggggaaguc.....                                   | 54                                                  | 1 | seq |  |
| .....uguagguaCagggaaguc.....                                   | 4                                                   | 1 | seq |  |
| .....uguagguaaggggaUguc.....                                   | 40                                                  | 1 | seq |  |
| .....uguagguaaggggaGguc.....                                   | 334                                                 | 1 | seq |  |
| .....uguagguaaaggUaaguc.....                                   | 15                                                  | 1 | seq |  |
| .....uguagguaaagggaacUc.....                                   | 12                                                  | 1 | seq |  |
| .....uguagguaaAaggaaguc.....                                   | 66                                                  | 1 | seq |  |
| .....uguagCguaaggggaaguc.....                                  | 4                                                   | 1 | seq |  |
| .....uguaggAaaggggaaguc.....                                   | 42                                                  | 1 | seq |  |
| .....uguagguaUaggggaaguc.....                                  | 13                                                  | 1 | seq |  |
| .....uguUgguaaggggaaguc.....                                   | 68                                                  | 1 | seq |  |
| .....uguagguaaaggGaguc.....                                    | 14                                                  | 1 | seq |  |
| .....uguagguaaaggUaguc.....                                    | 63                                                  | 1 | seq |  |
| .....uCuagguaaggggaaguc.....                                   | 4                                                   | 1 | seq |  |
| .....uguGgguaaggggaaguc.....                                   | 221                                                 | 1 | seq |  |
| .....Nguagguaaggggaaguc.....                                   | 110                                                 | 1 | seq |  |
| .....uguagguaaggCaaguc.....                                    | 5                                                   | 1 | seq |  |
| .....uguagguaaggggaUuc.....                                    | 19                                                  | 1 | seq |  |
| .....uNuagguaaggggaaguc.....                                   | 2                                                   | 1 | seq |  |
| .....uguagCuaaggggaaguc.....                                   | 4                                                   | 1 | seq |  |
| .....uguagCuaaggggaagucg.....                                  | 3                                                   | 1 | seq |  |
| .....Cguagguaaggggaagucg.....                                  | 319                                                 | 1 | seq |  |
| .....uguagguaaCggaagucg.....                                   | 2                                                   | 1 | seq |  |
| .....uguagguaaagggaagGcg.....                                  | 366                                                 | 1 | seq |  |
| .....uguagguaaggggaUgucg.....                                  | 28                                                  | 1 | seq |  |
| .....uguagguaUaggggaagucg.....                                 | 9                                                   | 1 | seq |  |
| .....uguaggGaaaggggaagucg.....                                 | 34                                                  | 1 | seq |  |
| .....uguagguaagggGagucg.....                                   | 21                                                  | 1 | seq |  |
| .....uguaggCaaggggaagucg.....                                  | 157                                                 | 1 | seq |  |
| .....Gguagguaaagggaagucg.....                                  | 152                                                 | 1 | seq |  |
| .....uguaggAaaggggaagucg.....                                  | 23                                                  | 1 | seq |  |
| .....uguagguaaggggaagucg.....                                  | 93088                                               | 0 | seq |  |

# Mature Star

|                                                                   |                                                   |   |     |  |
|-------------------------------------------------------------------|---------------------------------------------------|---|-----|--|
| cacugaaaaauugaauuuuguuuucagggucuccaagguaaacagucuuugggucaauagaacau | uguagguaaggggaagucggcaaacgaauccguaaacuucuaugugcaa |   |     |  |
| .....uCuagguaaggggaagucg.....                                     | 8                                                 | 1 | seq |  |
| .....ugGagguaaggggaagucg.....                                     | 45                                                | 1 | seq |  |
| .....uguagguaaggggaalucg.....                                     | 33                                                | 1 | seq |  |
| .....uguagguaUggggaagucg.....                                     | 58                                                | 1 | seq |  |
| .....uguagguaagCgaagucg.....                                      | 17                                                | 1 | seq |  |
| .....uguUgguaaggggaagucg.....                                     | 66                                                | 1 | seq |  |
| .....uguagAuaaggggaagucg.....                                     | 41                                                | 1 | seq |  |
| .....uUuagguaaggggaagucg.....                                     | 35                                                | 1 | seq |  |
| .....uguagguaaggggaalucg.....                                     | 12                                                | 1 | seq |  |
| .....uguagguaaAggaagucg.....                                      | 39                                                | 1 | seq |  |
| .....uguagguaCagggaagucg.....                                     | 2                                                 | 1 | seq |  |
| .....uguaCguaaggggaagucg.....                                     | 4                                                 | 1 | seq |  |
| .....uguagguaaggCaagucg.....                                      | 3                                                 | 1 | seq |  |
| .....Nguagguaaggggaagucg.....                                     | 116                                               | 1 | seq |  |
| .....uguagguaagggUagucg.....                                      | 41                                                | 1 | seq |  |
| .....uguagguaaggggaalucg.....                                     | 6                                                 | 1 | seq |  |
| .....uguagguaaggggaGucg.....                                      | 320                                               | 1 | seq |  |
| .....uguagUuaaggggaagucg.....                                     | 8                                                 | 1 | seq |  |
| .....uguGgguaaggggaagucg.....                                     | 213                                               | 1 | seq |  |
| .....uguagguaCggggaagucg.....                                     | 18                                                | 1 | seq |  |
| .....uguagguaaggggaagucC.....                                     | 709                                               | 1 | seq |  |
| .....uguCgguaaggggaagucg.....                                     | 7                                                 | 1 | seq |  |
| .....uguagguaaggUaagucg.....                                      | 9                                                 | 1 | seq |  |
| .....uguagguaagUgaagucg.....                                      | 16                                                | 1 | seq |  |
| .....uNuagguaaggggaagucg.....                                     | 1                                                 | 1 | seq |  |
| .....uguagguaGagggaagucg.....                                     | 130                                               | 1 | seq |  |
| .....uguagguaaagggaagucg.....                                     | 82                                                | 1 | seq |  |
| .....uAuaagguaaggggaagucg.....                                    | 46                                                | 1 | seq |  |
| .....uguagguaaggggaagAcg.....                                     | 85                                                | 1 | seq |  |
| .....uguGgguaaggggaagucgg.....                                    | 66                                                | 1 | seq |  |
| .....uguaCguaaggggaagucgg.....                                    | 4                                                 | 1 | seq |  |
| .....uguagguaagCgaagucgg.....                                     | 3                                                 | 1 | seq |  |
| .....Nguagguaaggggaagucgg.....                                    | 39                                                | 1 | seq |  |
| .....uguagguaaggggaalucgg.....                                    | 11                                                | 1 | seq |  |
| .....uguagguaaggggaagGcgg.....                                    | 39                                                | 1 | seq |  |
| .....uguagguaaggggaagucCg.....                                    | 50                                                | 1 | seq |  |
| .....uguagguaUagggaagucgg.....                                    | 1                                                 | 1 | seq |  |
| .....uguagguaaagAgaagucgg.....                                    | 26                                                | 1 | seq |  |
| .....uNuagguaaggggaagucgg.....                                    | 1                                                 | 1 | seq |  |
| .....uguagguaCggggaagucgg.....                                    | 9                                                 | 1 | seq |  |
| .....uguagguaaggggaUucgg.....                                     | 8                                                 | 1 | seq |  |
| .....uguagguaGagggaagucgg.....                                    | 39                                                | 1 | seq |  |
| .....Gguagguaaggggaagucgg.....                                    | 54                                                | 1 | seq |  |
| .....uguUgguaaggggaagucgg.....                                    | 19                                                | 1 | seq |  |
| .....uguaggCaagggaagucgg.....                                     | 38                                                | 1 | seq |  |
| .....ugAagguaaggggaagucgg.....                                    | 12                                                | 1 | seq |  |
| .....uguagguaaggggaagAcgg.....                                    | 13                                                | 1 | seq |  |
| .....uguagUuaaggggaagucgg.....                                    | 4                                                 | 1 | seq |  |
| .....Cguaagguaaggggaagucgg.....                                   | 93                                                | 1 | seq |  |
| .....uguagAuaaggggaagucgg.....                                    | 12                                                | 1 | seq |  |
| .....uCuagguaaggggaagucgg.....                                    | 3                                                 | 1 | seq |  |
| .....uguagguaaggggaalucgg.....                                    | 6                                                 | 1 | seq |  |
| .....uAuaagguaaggggaagucgg.....                                   | 20                                                | 1 | seq |  |
| .....uguagguaagggCagucgg.....                                     | 2                                                 | 1 | seq |  |
| .....uguagguaagggUagucgg.....                                     | 18                                                | 1 | seq |  |
| .....uguagguaaggggaagucgg.....                                    | 29926                                             | 0 | seq |  |
| .....uguagguaagUgaagucgg.....                                     | 4                                                 | 1 | seq |  |
| .....uguaggGaagggaagucgg.....                                     | 7                                                 | 1 | seq |  |
| .....uguagguaaggggaalucgg.....                                    | 17                                                | 1 | seq |  |
| .....uguCgguaaggggaagucgg.....                                    | 2                                                 | 1 | seq |  |
| .....uguagguaCagggaagucgg.....                                    | 1                                                 | 1 | seq |  |
| .....uUuagguaaggggaagucgg.....                                    | 14                                                | 1 | seq |  |
| .....uguagguaaggggaagucUg.....                                    | 26                                                | 1 | seq |  |
| .....uguagguaUggggaagucgg.....                                    | 21                                                | 1 | seq |  |
| .....uguagguaaggggaagUGgg.....                                    | 5                                                 | 1 | seq |  |
| .....uguagguaaggggaagCcg.....                                     | 84                                                | 1 | seq |  |
| .....uguagguaagggGagucgg.....                                     | 106                                               | 1 | seq |  |
| .....uguagCuaaggggaagucgg.....                                    | 1                                                 | 1 | seq |  |
| .....uguagguaaggggaagucgC.....                                    | 207                                               | 1 | seq |  |
| .....ugGagguaaggggaagucgg.....                                    | 13                                                | 1 | seq |  |

# Mature Star

|                                                                 |                                                    |       |   |     |
|-----------------------------------------------------------------|----------------------------------------------------|-------|---|-----|
| cacugaaaaauugaaauuuguuuucaggucuccaagguaaacagucuuuggucaauagaacau | uguaagguaagggaaagucggcaaacgaauccguaaacuucuaagugcaa |       |   |     |
| .....                                                           | .....                                              | 4     | 1 | seq |
| .....                                                           | .....                                              | 14    | 1 | seq |
| .....                                                           | .....                                              | 3     | 1 | seq |
| .....                                                           | .....                                              | 111   | 1 | seq |
| .....                                                           | .....                                              | 1     | 1 | seq |
| .....                                                           | .....                                              | 48    | 1 | seq |
| .....                                                           | .....                                              | 91    | 1 | seq |
| .....                                                           | .....                                              | 1     | 1 | seq |
| .....                                                           | .....                                              | 5     | 1 | seq |
| .....                                                           | .....                                              | 24    | 1 | seq |
| .....                                                           | .....                                              | 4     | 1 | seq |
| .....                                                           | .....                                              | 5     | 1 | seq |
| .....                                                           | .....                                              | 5     | 1 | seq |
| .....                                                           | .....                                              | 6     | 1 | seq |
| .....                                                           | .....                                              | 16    | 1 | seq |
| .....                                                           | .....                                              | 124   | 1 | seq |
| .....                                                           | .....                                              | 24    | 1 | seq |
| .....                                                           | .....                                              | 8     | 1 | seq |
| .....                                                           | .....                                              | 30    | 1 | seq |
| .....                                                           | .....                                              | 138   | 1 | seq |
| .....                                                           | .....                                              | 9     | 1 | seq |
| .....                                                           | .....                                              | 4     | 1 | seq |
| .....                                                           | .....                                              | 87    | 1 | seq |
| .....                                                           | .....                                              | 20    | 1 | seq |
| .....                                                           | .....                                              | 26    | 1 | seq |
| .....                                                           | .....                                              | 33    | 1 | seq |
| .....                                                           | .....                                              | 11    | 1 | seq |
| .....                                                           | .....                                              | 4     | 1 | seq |
| .....                                                           | .....                                              | 15    | 1 | seq |
| .....                                                           | .....                                              | 19    | 1 | seq |
| .....                                                           | .....                                              | 7     | 1 | seq |
| .....                                                           | .....                                              | 4224  | 1 | seq |
| .....                                                           | .....                                              | 60    | 1 | seq |
| .....                                                           | .....                                              | 51    | 1 | seq |
| .....                                                           | .....                                              | 22    | 1 | seq |
| .....                                                           | .....                                              | 2     | 1 | seq |
| .....                                                           | .....                                              | 119   | 1 | seq |
| .....                                                           | .....                                              | 9     | 1 | seq |
| .....                                                           | .....                                              | 128   | 1 | seq |
| .....                                                           | .....                                              | 10    | 1 | seq |
| .....                                                           | .....                                              | 2     | 1 | seq |
| .....                                                           | .....                                              | 128   | 1 | seq |
| .....                                                           | .....                                              | 8     | 1 | seq |
| .....                                                           | .....                                              | 46    | 1 | seq |
| .....                                                           | .....                                              | 4     | 1 | seq |
| .....                                                           | .....                                              | 5     | 1 | seq |
| .....                                                           | .....                                              | 39071 | 0 | seq |
| .....                                                           | .....                                              | 1     | 1 | seq |
| .....                                                           | .....                                              | 5     | 1 | seq |
| .....                                                           | .....                                              | 77    | 1 | seq |
| .....                                                           | .....                                              | 4     | 1 | seq |
| .....                                                           | .....                                              | 14    | 1 | seq |
| .....                                                           | .....                                              | 109   | 1 | seq |
| .....                                                           | .....                                              | 9     | 1 | seq |
| .....                                                           | .....                                              | 20    | 1 | seq |
| .....                                                           | .....                                              | 434   | 1 | seq |
| .....                                                           | .....                                              | 2     | 1 | seq |
| .....                                                           | .....                                              | 130   | 1 | seq |
| .....                                                           | .....                                              | 418   | 1 | seq |
| .....                                                           | .....                                              | 101   | 1 | seq |
| .....                                                           | .....                                              | 104   | 1 | seq |
| .....                                                           | .....                                              | 69    | 1 | seq |
| .....                                                           | .....                                              | 59    | 1 | seq |
| .....                                                           | .....                                              | 190   | 1 | seq |
| .....                                                           | .....                                              | 5     | 1 | seq |
| .....                                                           | .....                                              | 84    | 1 | seq |
| .....                                                           | .....                                              | 41    | 1 | seq |
| .....                                                           | .....                                              | 138   | 1 | seq |
| .....                                                           | .....                                              | 23    | 1 | seq |
| .....                                                           | .....                                              | 29    | 1 | seq |

# Mature Star

|                                                                 |                                                   |        |   |     |
|-----------------------------------------------------------------|---------------------------------------------------|--------|---|-----|
| cacugaaaaauugaauuuuguuuucaggucuccaagguaaacagucuuuggucaauagaacau | uguagguuaaggggaagucggcaaacgaauccguaaacuucuagugcaa |        |   |     |
| .....                                                           | .....                                             | 473    | 1 | seq |
| .....                                                           | .....                                             | 9      | 1 | seq |
| .....                                                           | .....                                             | 83     | 1 | seq |
| .....                                                           | .....                                             | 64     | 1 | seq |
| .....                                                           | .....                                             | 164090 | 0 | seq |
| .....                                                           | .....                                             | 42     | 1 | seq |
| .....                                                           | .....                                             | 68     | 1 | seq |
| .....                                                           | .....                                             | 39     | 1 | seq |
| .....                                                           | .....                                             | 385    | 1 | seq |
| .....                                                           | .....                                             | 78     | 1 | seq |
| .....                                                           | .....                                             | 21     | 1 | seq |
| .....                                                           | .....                                             | 10     | 1 | seq |
| .....                                                           | .....                                             | 13     | 1 | seq |
| .....                                                           | .....                                             | 2      | 1 | seq |
| .....                                                           | .....                                             | 20     | 1 | seq |
| .....                                                           | .....                                             | 2      | 1 | seq |
| .....                                                           | .....                                             | 295    | 1 | seq |
| .....                                                           | .....                                             | 32     | 1 | seq |
| .....                                                           | .....                                             | 62     | 1 | seq |
| .....                                                           | .....                                             | 53     | 1 | seq |
| .....                                                           | .....                                             | 8      | 1 | seq |
| .....                                                           | .....                                             | 9      | 1 | seq |
| .....                                                           | .....                                             | 39     | 1 | seq |
| .....                                                           | .....                                             | 32     | 1 | seq |
| .....                                                           | .....                                             | 1196   | 1 | seq |
| .....                                                           | .....                                             | 6111   | 1 | seq |
| .....                                                           | .....                                             | 206    | 1 | seq |
| .....                                                           | .....                                             | 25     | 1 | seq |
| .....                                                           | .....                                             | 7      | 1 | seq |
| .....                                                           | .....                                             | 82     | 1 | seq |
| .....                                                           | .....                                             | 12     | 1 | seq |
| .....                                                           | .....                                             | 123    | 1 | seq |
| .....                                                           | .....                                             | 2      | 1 | seq |
| .....                                                           | .....                                             | 522    | 1 | seq |
| .....                                                           | .....                                             | 25     | 1 | seq |
| .....                                                           | .....                                             | 498    | 1 | seq |
| .....                                                           | .....                                             | 421    | 1 | seq |
| .....                                                           | .....                                             | 16     | 1 | seq |
| .....                                                           | .....                                             | 99     | 1 | seq |
| .....                                                           | .....                                             | 553    | 1 | seq |
| .....                                                           | .....                                             | 33     | 1 | seq |
| .....                                                           | .....                                             | 203    | 1 | seq |
| .....                                                           | .....                                             | 317    | 1 | seq |
| .....                                                           | .....                                             | 32     | 1 | seq |
| .....                                                           | .....                                             | 3      | 1 | seq |
| .....                                                           | .....                                             | 8      | 1 | seq |
| .....                                                           | .....                                             | 1      | 1 | seq |
| .....                                                           | .....                                             | 1      | 1 | seq |
| .....                                                           | .....                                             | 1      | 1 | seq |
| .....                                                           | .....                                             | 18     | 1 | seq |
| .....                                                           | .....                                             | 124    | 1 | seq |
| .....                                                           | .....                                             | 4770   | 0 | seq |
| .....                                                           | .....                                             | 2      | 1 | seq |
| .....                                                           | .....                                             | 12     | 1 | seq |
| .....                                                           | .....                                             | 13     | 1 | seq |
| .....                                                           | .....                                             | 1      | 1 | seq |
| .....                                                           | .....                                             | 13     | 1 | seq |
| .....                                                           | .....                                             | 1      | 1 | seq |
| .....                                                           | .....                                             | 5      | 1 | seq |
| .....                                                           | .....                                             | 4      | 1 | seq |
| .....                                                           | .....                                             | 1      | 1 | seq |
| .....                                                           | .....                                             | 8      | 1 | seq |
| .....                                                           | .....                                             | 7      | 1 | seq |
| .....                                                           | .....                                             | 1      | 1 | seq |
| .....                                                           | .....                                             | 3      | 1 | seq |
| .....                                                           | .....                                             | 4      | 1 | seq |
| .....                                                           | .....                                             | 15     | 1 | seq |
| .....                                                           | .....                                             | 1      | 1 | seq |
| .....                                                           | .....                                             | 72     | 1 | seq |
| .....                                                           | .....                                             | 2      | 1 | seq |

# Mature Star

|                                                                 |                                       |                    |         |     |
|-----------------------------------------------------------------|---------------------------------------|--------------------|---------|-----|
| cacugaaaaauugaaauuuguuuucaggucuccaagguaaacagucuuuggucaauagaacau | uguaagguaaggggaagucggcaaa             | acgaauccguaacuucua | agugcaa |     |
| .....                                                           | .....uguaagguaagUgaagucggcaa.....     | 1                  | 1       | seq |
| .....                                                           | .....uguGgguaaggggaagucggcaa.....     | 14                 | 1       | seq |
| .....                                                           | .....uguaagguaaggggaUgucggcaa.....    | 1                  | 1       | seq |
| .....                                                           | .....ugAagguaaaggggaagucggcaa.....    | 1                  | 1       | seq |
| .....                                                           | .....uguaagguaaaggggaagucgUcaa.....   | 3                  | 1       | seq |
| .....                                                           | .....uguaagguaaaggggaagucCgcaa.....   | 1                  | 1       | seq |
| .....                                                           | .....uguaagguaaagAgaagucggcaa.....    | 5                  | 1       | seq |
| .....                                                           | .....uguaagguaaaggggaagucggcGa.....   | 37                 | 1       | seq |
| .....                                                           | .....uguaagguaaaggggaagCcgga.....     | 11                 | 1       | seq |
| .....                                                           | .....uguaagAuaaggggaagucggcaa.....    | 6                  | 1       | seq |
| .....                                                           | .....uguUgguaaaggggaagucggcaa.....    | 2                  | 1       | seq |
| .....                                                           | .....uguaagguaaaggggaGgucggcaa.....   | 14                 | 1       | seq |
| .....                                                           | .....Nguagguaaaggggaagucggcaa.....    | 5                  | 1       | seq |
| .....                                                           | .....uguaagguaaaggggaagucUgcaa.....   | 3                  | 1       | seq |
| .....                                                           | .....uguaagguaaaggggaagucggcCa.....   | 8                  | 1       | seq |
| .....                                                           | .....uguaagguaaaggggaagucggUaa.....   | 4                  | 1       | seq |
| .....                                                           | .....uguaagguaaaggggaagucggcaaaa..... | 4338               | 0       | seq |
| .....                                                           | .....uguaagguaGgggaagucggcaaaa.....   | 16                 | 1       | seq |
| .....                                                           | .....Cguaagguaaaggggaagucggcaaaa..... | 15                 | 1       | seq |
| .....                                                           | .....uguaagguaaaggggaUucggcaaaa.....  | 1                  | 1       | seq |
| .....                                                           | .....uguaagguaaaggggaagucggGaaa.....  | 1                  | 1       | seq |
| .....                                                           | .....uguaagguaaaggggaagCcgga.....     | 8                  | 1       | seq |
| .....                                                           | .....uguaagguaaaggggaAucggcaaaa.....  | 1                  | 1       | seq |
| .....                                                           | .....uguaagguaaaggggaagAcggcaaaa..... | 2                  | 1       | seq |
| .....                                                           | .....uguaagguaaaggggaUgucggcaaaa..... | 1                  | 1       | seq |
| .....                                                           | .....uguaagguaaaggggaagucggcaaU.....  | 17                 | 1       | seq |
| .....                                                           | .....uguaagguaaUggaagucggcaaaa.....   | 1                  | 1       | seq |
| .....                                                           | .....uguaagguaaaggggaagucggcCa.....   | 1                  | 1       | seq |
| .....                                                           | .....uguaagguaaaggggaagucggcaaC.....  | 4                  | 1       | seq |
| .....                                                           | .....ugAagguaaaggggaagucggcaaaa.....  | 1                  | 1       | seq |
| .....                                                           | .....Gguaagguaaaggggaagucggcaaaa..... | 9                  | 1       | seq |
| .....                                                           | .....ugGagguaaaggggaagucggcaaaa.....  | 1                  | 1       | seq |
| .....                                                           | .....uguaagguaaagUgaagucggcaaaa.....  | 1                  | 1       | seq |
| .....                                                           | .....uguaagguaaaggggaagucggUaaa.....  | 4                  | 1       | seq |
| .....                                                           | .....Nguagguaaaggggaagucggcaaaa.....  | 12                 | 1       | seq |
| .....                                                           | .....uguaagAuaaggggaagucggcaaaa.....  | 1                  | 1       | seq |
| .....                                                           | .....uguaagguaUgggaagucggcaaaa.....   | 1                  | 1       | seq |
| .....                                                           | .....uguaagguaaagAgaagucggcaaaa.....  | 4                  | 1       | seq |
| .....                                                           | .....uguaagguaaaggggaagucgUcaaaa..... | 1                  | 1       | seq |
| .....                                                           | .....uguaagguaCgggaagucggcaaaa.....   | 1                  | 1       | seq |
| .....                                                           | .....uguaagguaaagggGagucggcaaaa.....  | 19                 | 1       | seq |
| .....                                                           | .....uguaagguaaaggggaagucggcGa.....   | 22                 | 1       | seq |
| .....                                                           | .....uguaagguaaaggggaagucgCcaaaa..... | 1                  | 1       | seq |
| .....                                                           | .....uguaaggCaaggggaagucggcaaaa.....  | 4                  | 1       | seq |
| .....                                                           | .....uguGgguaaaggggaagucggcaaaa.....  | 9                  | 1       | seq |
| .....                                                           | .....uguaaggGaaaggaagucggcaaaa.....   | 1                  | 1       | seq |
| .....                                                           | .....uguaagguaaaggggaGgucggcaaaa..... | 9                  | 1       | seq |
| .....                                                           | .....uAuaagguaaaggggaagucggcaaaa..... | 1                  | 1       | seq |
| .....                                                           | .....uguaagguaaaggggaagucUgcaaaa..... | 1                  | 1       | seq |
| .....                                                           | .....uguaagguaaaggggaagucggcGaa.....  | 14                 | 1       | seq |
| .....                                                           | .....uguaagguaaaggggaagUggcaaaa.....  | 1                  | 1       | seq |
| .....                                                           | .....uguUgguaaaggggaagucggcaaaa.....  | 4                  | 1       | seq |
| .....                                                           | .....uguaagguGaggggaagucggcaaaa.....  | 9                  | 1       | seq |
| .....                                                           | .....uguaagguaaAaggaagucggcaaaa.....  | 3                  | 1       | seq |
| .....                                                           | .....uguaagguaaaggggaagucggcaaG.....  | 61                 | 1       | seq |
| .....                                                           | .....uguaagguaaAaggaagucggcaaaa.....  | 1                  | 1       | seq |
| .....                                                           | .....uguaagAuaaggggaagucggcaaaa.....  | 1                  | 1       | seq |
| .....                                                           | .....uguaagguaaaggggaagucggcCa.....   | 3                  | 1       | seq |
| .....                                                           | .....uguaaggGaaaggaagucggcaaaa.....   | 1                  | 1       | seq |
| .....                                                           | .....uguaagguGaggggaagucggcaaaa.....  | 4                  | 1       | seq |
| .....                                                           | .....uguaagguaagAgaagucggcaaaa.....   | 2                  | 1       | seq |
| .....                                                           | .....uguaagguaaaggggaagucggcGaa.....  | 6                  | 1       | seq |
| .....                                                           | .....uguaagguaaUggaagucggcaaaa.....   | 1                  | 1       | seq |
| .....                                                           | .....uguaagguaaaggggaagucgUcaaaa..... | 1                  | 1       | seq |
| .....                                                           | .....uguaagguaagCgaagucggcaaaa.....   | 1                  | 1       | seq |
| .....                                                           | .....uguaagguaaaggggaagucggcGaaa..... | 6                  | 1       | seq |
| .....                                                           | .....Nguagguaaaggggaagucggcaaaa.....  | 2                  | 1       | seq |
| .....                                                           | .....uguaagguaaaggggaagGcgga.....     | 1                  | 1       | seq |
| .....                                                           | .....uguaaggAaaggggaagucggcaaaa.....  | 2                  | 1       | seq |
| .....                                                           | .....uguaagguaaaggggaAucggcaaaa.....  | 1                  | 1       | seq |



# Mature Star

|                                                                |                              |                    |         |      |   |     |
|----------------------------------------------------------------|------------------------------|--------------------|---------|------|---|-----|
| cacugaaaaauugaauuuguuuucaggucuccaagguaaacagucuuuggucaauagaacau | uguagguaaggggaagucggcaaa     | acgaauccguaacuucua | agugcaa |      |   |     |
| .....                                                          | uguagguaaggggaagucggcaaaa    |                    |         | 2    | 1 | seq |
| .....                                                          | uguUgguaaggggaagucggcaaaa    |                    |         | 2    | 1 | seq |
| .....                                                          | uguagguaagggGagucggcaaaa     |                    |         | 4    | 1 | seq |
| .....                                                          | uguagguaagggaaCucggcaaaa     |                    |         | 1    | 1 | seq |
| .....                                                          | uguagguaaggggaagAcggcaaaa    |                    |         | 3    | 1 | seq |
| .....                                                          | uguGgguaaggggaagucggcaaaa    |                    |         | 11   | 1 | seq |
| .....                                                          | uguagguaaggggaagucggcaaUa    |                    |         | 2    | 1 | seq |
| .....                                                          | uguagguaaggggaagucggcaaGa    |                    |         | 5    | 1 | seq |
| .....                                                          | uguagguaaggggaagCcggaaaa     |                    |         | 3    | 1 | seq |
| .....                                                          | uguagguaaggggaagucggcaCaa    |                    |         | 1    | 1 | seq |
| .....                                                          | uguagguaaggggaagucggcaaaC    |                    |         | 4    | 1 | seq |
| .....                                                          | uguagguaagggGagucggcaaaa     |                    |         | 2    | 1 | seq |
| .....                                                          | uguagguaGgggaagucggcaaaa     |                    |         | 8    | 1 | seq |
| .....                                                          | uguagguaUaggggaagucggcaaaa   |                    |         | 1    | 1 | seq |
| .....                                                          | uguagguaaggggaagucggcaaAG    |                    |         | 13   | 1 | seq |
| .....                                                          | uguagguaaggggaGgucggcaaaa    |                    |         | 5    | 1 | seq |
| .....                                                          | Cguagguaaggggaagucggcaaaa    |                    |         | 5    | 1 | seq |
| .....                                                          | uguaggCaaggggaagucggcaaaa    |                    |         | 3    | 1 | seq |
| .....                                                          | uguagguaaggggaagucggcaaaa    |                    |         | 1833 | 0 | seq |
| .....                                                          | ugGagguaaggggaagucggcaaaa    |                    |         | 1    | 1 | seq |
| .....                                                          | uguagguaaUggaagucggcaaaac    |                    |         | 1    | 1 | seq |
| .....                                                          | uguagguaaggggaagucggcaaAGC   |                    |         | 2    | 1 | seq |
| .....                                                          | uguagguaagggGagucggcaaaac    |                    |         | 7    | 1 | seq |
| .....                                                          | uguagguaaggggaagCcggaaaac    |                    |         | 4    | 1 | seq |
| .....                                                          | uguagguaGaggggaagucggcaaaac  |                    |         | 1    | 1 | seq |
| .....                                                          | uguagguaaggggaagucggcaAGac   |                    |         | 2    | 1 | seq |
| .....                                                          | uguagguaaggggaGgucggcaaaac   |                    |         | 1    | 1 | seq |
| .....                                                          | uguagguaaggggaagucggcaaAGac  |                    |         | 2    | 1 | seq |
| .....                                                          | uguGgguaaggggaagucggcaaaac   |                    |         | 4    | 1 | seq |
| .....                                                          | uguagguaaggggaagucggcaaAUc   |                    |         | 1    | 1 | seq |
| .....                                                          | uguagguaaggggaagAcggcaaaac   |                    |         | 1    | 1 | seq |
| .....                                                          | uguagguaagAGaagucggcaaaac    |                    |         | 1    | 1 | seq |
| .....                                                          | Nguaagguaaggggaagucggcaaaac  |                    |         | 2    | 1 | seq |
| .....                                                          | uguagguaaggggaagucggcaaaac   |                    |         | 972  | 0 | seq |
| .....                                                          | uguagguaagggUaagucggcaaaac   |                    |         | 1    | 1 | seq |
| .....                                                          | uguagguaaggggaagucggUaaaac   |                    |         | 2    | 1 | seq |
| .....                                                          | Cguagguaaggggaagucggcaaaac   |                    |         | 5    | 1 | seq |
| .....                                                          | uguagguaaggggaagucUgcaaaac   |                    |         | 1    | 1 | seq |
| .....                                                          | uguagguaaggggaUgucggcaaaac   |                    |         | 1    | 1 | seq |
| .....                                                          | uguagguaaggggaagucggcaaaAG   |                    |         | 1    | 1 | seq |
| .....                                                          | uguagguaaAGgaagucggcaaaac    |                    |         | 1    | 1 | seq |
| .....                                                          | uguagguaaggggaagucggcaaaA    |                    |         | 16   | 1 | seq |
| .....                                                          | uguaUguaaggggaagucggcaaaac   |                    |         | 1    | 1 | seq |
| .....                                                          | uguagguaaggggaagucggcaaCac   |                    |         | 1    | 1 | seq |
| .....                                                          | uguagguaaGgggaagucggcaaaac   |                    |         | 2    | 1 | seq |
| .....                                                          | uguagguaagCGaagucggcaaaac    |                    |         | 1    | 1 | seq |
| .....                                                          | uguagguaaggggaagucggcGaaac   |                    |         | 3    | 1 | seq |
| .....                                                          | uguagguaUgggaagucggcaaaac    |                    |         | 1    | 1 | seq |
| .....                                                          | Gguagguaaggggaagucggcaaaac   |                    |         | 2    | 1 | seq |
| .....                                                          | uguagguaaggggaagucggcaaaCc   |                    |         | 1    | 1 | seq |
| .....                                                          | uguagguaaAGgaagucggcaaaacG   |                    |         | 1    | 1 | seq |
| .....                                                          | uAuaagguaaggggaagucggcaaaacG |                    |         | 4    | 1 | seq |
| .....                                                          | uguagguaaggggaagucggcaaaacC  |                    |         | 16   | 1 | seq |
| .....                                                          | uguagguaaggggaagucAGcaaaacG  |                    |         | 10   | 1 | seq |
| .....                                                          | uguagguaaggggaCgucggcaaaacG  |                    |         | 2    | 1 | seq |
| .....                                                          | uguagguaaggggaagucggcaaaAGcg |                    |         | 12   | 1 | seq |
| .....                                                          | uguagguaaggggaagAcggcaaaacG  |                    |         | 1    | 1 | seq |
| .....                                                          | uguagguaaggggaagucggcaaaCCg  |                    |         | 1    | 1 | seq |
| .....                                                          | uguaUguaaggggaagucggcaaaacG  |                    |         | 1    | 1 | seq |
| .....                                                          | uguagguaaggggaUucggcaaaacG   |                    |         | 1    | 1 | seq |
| .....                                                          | uguagguaagggGagucggcaaaacG   |                    |         | 12   | 1 | seq |
| .....                                                          | ugAagguaaggggaagucggcaaaacG  |                    |         | 2    | 1 | seq |
| .....                                                          | uguaggAaagggaagucggcaaaacG   |                    |         | 2    | 1 | seq |
| .....                                                          | uguagguaGaggggaagucggcaaaacG |                    |         | 4    | 1 | seq |
| .....                                                          | uguagguaaggggaagucggcaaaacU  |                    |         | 10   | 1 | seq |
| .....                                                          | uguagguaaggggaagucggcaaCacG  |                    |         | 1    | 1 | seq |
| .....                                                          | uguagguaaggggaGgucggcaaaacG  |                    |         | 12   | 1 | seq |
| .....                                                          | uguagguaGgggaagucggcaaaacG   |                    |         | 13   | 1 | seq |
| .....                                                          | ugGagguaaagggaagucggcaaaacG  |                    |         | 2    | 1 | seq |
| .....                                                          | uguagguaaggggaagucggcaaGacG  |                    |         | 10   | 1 | seq |

**Mature**      **Star**

cacugaaaaauugaauuuguuucaggucuccaagguaaacagucuuuggucaauagaacauuguagguaagggagucggcaaacgaauccguaacuucuagugcaa

|                                                    |      |   |     |
|----------------------------------------------------|------|---|-----|
| .....uguagguuaaggggaagucggcaaaaAg.....             | 1    | 1 | seq |
| .....uguagguuaaggggaagucggcaGaaacg.....            | 4    | 1 | seq |
| .....uguagguuaCgggaagucggcaaaaacg.....             | 2    | 1 | seq |
| .....Cguagguuaaggggaagucggcaaaaacg.....            | 12   | 1 | seq |
| .....uguagguuaagUgaagucggcaaaaacg.....             | 1    | 1 | seq |
| .....uguagguuaaggggaagucggcaaaaUcg.....            | 1    | 1 | seq |
| .....uguagguuaagAgaaagucggcaaaaacg.....            | 4    | 1 | seq |
| .....uguagguuaaggggaaguaAggcaaaaacg.....           | 1    | 1 | seq |
| .....uguaggCaaggggaagucggcaaaaacg.....             | 2    | 1 | seq |
| .....uguagguuaaggggaagugGggcaaaaacg.....           | 1    | 1 | seq |
| .....uguagguuaaggggaagGcggcaaaaacg.....            | 1    | 1 | seq |
| .....uUuagguuaaggggaagucggcaaaaacg.....            | 2    | 1 | seq |
| .....uguagAuaaggggaagucggcaaaaacg.....             | 2    | 1 | seq |
| .....uguagguuaaggggaagucggcNaaaacg.....            | 1    | 1 | seq |
| .....uCuaagguuaaggggaagucggcaaaaacg.....           | 1    | 1 | seq |
| .....uguagguuaaggggaagucUgc aaaacg.....            | 3    | 1 | seq |
| .....Nguagguuaaggggaagucggcaaaaacg.....            | 6    | 1 | seq |
| .....uguuUgguaaggggaagucggcaaaaacg.....            | 3    | 1 | seq |
| .....uguagguuaaggggUagucggcaaaaacg.....            | 2    | 1 | seq |
| .....uguagguuaaggggaagucggcaaUacg.....             | 1    | 1 | seq |
| .....Gguagguuaaggggaagucggcaaaaacg.....            | 3    | 1 | seq |
| .....uguuGgguaaggggaagucggcaaaaacg.....            | 6    | 1 | seq |
| .....uguagguuaagggUaagucggcaaaaacg.....            | 2    | 1 | seq |
| .....uguagguuaaggggaagucggUaaaaacg.....            | 3    | 1 | seq |
| .....uguagguuaaggggaagucgAgcaaaaacg.....           | 4    | 1 | seq |
| .....uguagguuaaggggaagucggcaaaaGg.....             | 1    | 1 | seq |
| .....uguagguuaaggggaagucggcGaaaacg.....            | 7    | 1 | seq |
| .....uguagguuaaggggaagucCgc aaaacg.....            | 1    | 1 | seq |
| .....uguagguuaUgggaagucggcaaaaacg.....             | 2    | 1 | seq |
| .....uguagguuaaggggaagucggcaaaaacg.....            | 3395 | 0 | seq |
| .....uguagguuaaggggaagCcggc aaaacg.....            | 5    | 1 | seq |
| .....uguagguuaaggggaagucggcaaaaacga.....           | 263  | 0 | seq |
| .....uguagguuaaggggCagucggcaaaaacga.....           | 1    | 1 | seq |
| .....uguagguuaGgggaagucggcaaaaacga.....            | 1    | 1 | seq |
| .....uguagguuaaggggaagucggcaaaaacgC.....           | 35   | 1 | seq |
| .....uguagguuaaggggaagAgcgcaaaaacga.....           | 1    | 1 | seq |
| .....uguagguuaaggggaagucggcaaaGcg.....             | 1    | 1 | seq |
| .....Nguagguuaaggggaagucggcaaaaacga.....           | 1    | 1 | seq |
| .....uguagguuaaggggaagucggcaaaCcg.....             | 1    | 1 | seq |
| .....uguagguuaaggggaagucggcaaaaacgU.....           | 46   | 1 | seq |
| .....uguagguuaagAgaaagucggcaaaaacga.....           | 1    | 1 | seq |
| .....uguagguuaaggggaagucggcaaaaAg.....             | 1    | 1 | seq |
| .....uguuGgguaaggggaagucggcaaaaacga.....           | 1    | 1 | seq |
| .....uguagguuaaggggaagucggcaaaaacga.....           | 1    | 0 | seq |
| .....uguagguuaaggggaagucggcaaaaacgCa.....          | 3    | 1 | seq |
| .....uguagguuaaggggaagucggcaaaaacgCau.....         | 1    | 1 | seq |
| .....uguagguuaaggggaagucggcaaaaacgCauc.....        | 2    | 1 | seq |
| .....uguagguuaaggggaagucggcaaaaacgaauc.....        | 1    | 0 | seq |
| .....uguagguuaaggggaagucggcaaaaacgUaucc.....       | 2    | 1 | seq |
| .....uguagguuaaggggaagucggcaaaaacgaauccC.....      | 1    | 1 | seq |
| .....uguagguuaaggggaagucggcaaaaacgUauccg.....      | 1    | 1 | seq |
| .....uguagguuaaggggaagucggcaaaaacgaauccg.....      | 1    | 0 | seq |
| .....uguagguuaaggggaagucggcaaaaacgUauccgu.....     | 2    | 1 | seq |
| .....uguagguuaaggggaagucggcaaaaacgaauccgu.....     | 1    | 0 | seq |
| .....uguagguuaaggggaagucggcaaaaacgaauccgA.....     | 1    | 1 | seq |
| .....uguagguuaaggggaagucggcaaaaacgaauccgua.....    | 5    | 0 | seq |
| .....uguagguuaaggggaagucggcaaaaacgCauccgua.....    | 1    | 1 | seq |
| .....uguagguuaaggggaagucggcGaaacgaauccgua.....     | 1    | 1 | seq |
| .....uguagguuaaggggaagucggcaaaaacgaauccguaac.....  | 2    | 0 | seq |
| .....uguagguuaaggggaagucggcaaaaacgaauccguaacu..... | 2    | 0 | seq |
| .....Gguagguuaaggggaagucggcaaaaacgaauccguaacu..... | 1    | 1 | seq |
| .....uguagguuaaggggaagucggcaaaaacgCauccguaacu..... | 1    | 1 | seq |
| .....uguagguuaaggggaagucggcaaaaacgUauccguaacu..... | 2    | 1 | seq |
| .....guGgguaaggggaagucg.....                       | 1    | 1 | seq |
| .....Nuagguuaaggggaagucg.....                      | 1    | 1 | seq |
| .....Auaagguuaaggggaagucg.....                     | 1    | 1 | seq |
| .....Cuagguuaaggggaagucg.....                      | 7    | 1 | seq |
| .....guagguGaggggaagucg.....                       | 1    | 1 | seq |
| .....guagguuaaggggaagAg.....                       | 1    | 1 | seq |
| .....guagguuaaggggaagGcg.....                      | 1    | 1 | seq |

# Mature Star

|                                                                 |                                              |                    |         |     |  |  |
|-----------------------------------------------------------------|----------------------------------------------|--------------------|---------|-----|--|--|
| cacugaaaaauugaauuuuguuucaggucuccaagguaaacagucuuuggucaauagaacauu | guagguaaggggaagucggcaaa                      | acgaauccguaacuucua | agugcaa |     |  |  |
| .....                                                           | ..Uuagguaaggggaagucg.....                    | 15                 | 1       | seq |  |  |
| .....                                                           | ..guagguaaggggUagucg.....                    | 1                  | 1       | seq |  |  |
| .....                                                           | ..guagguaaagAgaagucg.....                    | 1                  | 1       | seq |  |  |
| .....                                                           | ..guagguaaaggUaaagucg.....                   | 1                  | 1       | seq |  |  |
| .....                                                           | ..guagguaaggggaGucg.....                     | 2                  | 1       | seq |  |  |
| .....                                                           | ..guagguaaggggaagucg.....                    | 184                | 0       | seq |  |  |
| .....                                                           | ..guagguaaggggaagucCg.....                   | 1                  | 1       | seq |  |  |
| .....                                                           | ..guagguaaggggGagucgg.....                   | 1                  | 1       | seq |  |  |
| .....                                                           | ..Uuagguaaggggaagucgg.....                   | 9                  | 1       | seq |  |  |
| .....                                                           | ..Cuagguaaggggaagucgg.....                   | 1                  | 1       | seq |  |  |
| .....                                                           | ..guagguaaggggaagucgg.....                   | 63                 | 0       | seq |  |  |
| .....                                                           | ..guagguaaggggaGucgg.....                    | 1                  | 1       | seq |  |  |
| .....                                                           | ..guagguaaggggaagucgC.....                   | 1                  | 1       | seq |  |  |
| .....                                                           | ..guagguaaggggaagucgg.....                   | 1                  | 1       | seq |  |  |
| .....                                                           | ..guagguaaggggaagucgC.....                   | 1                  | 1       | seq |  |  |
| .....                                                           | ..guagguaagAgaagucggc.....                   | 2                  | 1       | seq |  |  |
| .....                                                           | ..Uuagguaaggggaagucggc.....                  | 4                  | 1       | seq |  |  |
| .....                                                           | ..guagguaaggggaagucggc.....                  | 169                | 0       | seq |  |  |
| .....                                                           | ..guagguaaggggaGucggc.....                   | 1                  | 1       | seq |  |  |
| .....                                                           | ..Auagguaaggggaagucggc.....                  | 1                  | 1       | seq |  |  |
| .....                                                           | ..guagguaGgggaagucggc.....                   | 1                  | 1       | seq |  |  |
| .....                                                           | ..guagguaaggggaagucggU.....                  | 19                 | 1       | seq |  |  |
| .....                                                           | ..guagguaaggggaagucggcU.....                 | 1                  | 1       | seq |  |  |
| .....                                                           | ..guagguaaggggaagucggcG.....                 | 8                  | 1       | seq |  |  |
| .....                                                           | ..guagguaaggggaCucggcga.....                 | 1                  | 1       | seq |  |  |
| .....                                                           | ..Auagguaaggggaagucggcga.....                | 2                  | 1       | seq |  |  |
| .....                                                           | ..guagguaGgggaagucggcga.....                 | 1                  | 1       | seq |  |  |
| .....                                                           | ..guagguaaaggUaaagucggca.....                | 1                  | 1       | seq |  |  |
| .....                                                           | ..guagguaaggggaagucggca.....                 | 134                | 0       | seq |  |  |
| .....                                                           | ..Uuagguaaggggaagucggca.....                 | 11                 | 1       | seq |  |  |
| .....                                                           | ..Nuagguaaggggaagucggca.....                 | 1                  | 1       | seq |  |  |
| .....                                                           | ..Cuagguaaggggaagucggca.....                 | 1                  | 1       | seq |  |  |
| .....                                                           | ..guagguaaAgaagucggca.....                   | 2                  | 1       | seq |  |  |
| .....                                                           | ..guagguaaggggaagucgCca.....                 | 1                  | 1       | seq |  |  |
| .....                                                           | ..guagguaGgggaagucggcaa.....                 | 1                  | 1       | seq |  |  |
| .....                                                           | ..guagguaaggggaagucggcaa.....                | 12                 | 0       | seq |  |  |
| .....                                                           | ..guagguaaggggaagucggcaaaa.....              | 15                 | 0       | seq |  |  |
| .....                                                           | ..Uuagguaaggggaagucggcaaaa.....              | 3                  | 1       | seq |  |  |
| .....                                                           | ..guagguaaggggaagucggcaaaaG.....             | 1                  | 1       | seq |  |  |
| .....                                                           | ..guagguaaggggaagucggcaaaa.....              | 15                 | 0       | seq |  |  |
| .....                                                           | ..guagguaaggggaagucggcaaaaA.....             | 1                  | 1       | seq |  |  |
| .....                                                           | ..guagguaaggggaagucggcaaaaac.....            | 23                 | 0       | seq |  |  |
| .....                                                           | ..Auagguaaggggaagucggcaaaaac.....            | 1                  | 1       | seq |  |  |
| .....                                                           | ..guagguaaggggaagucgUcaaaaac.....            | 1                  | 1       | seq |  |  |
| .....                                                           | ..Uuagguaaggggaagucggcaaaaacg.....           | 1                  | 1       | seq |  |  |
| .....                                                           | ..Nuagguaaggggaagucggcaaaaacg.....           | 1                  | 1       | seq |  |  |
| .....                                                           | ..guagguaaggggaagucggcaaaaacg.....           | 38                 | 0       | seq |  |  |
| .....                                                           | ..guagguaaggggaagucggcaaaaacga.....          | 2                  | 0       | seq |  |  |
| .....                                                           | ..guagguaaggggaagucggcaaaaacgaauccguaac..... | 1                  | 0       | seq |  |  |
| .....                                                           | ..uaggCaaggggaagucgg.....                    | 4                  | 1       | seq |  |  |
| .....                                                           | ..uagguaaggggaagucgg.....                    | 2813               | 0       | seq |  |  |
| .....                                                           | ..uagguaagAgaagucgg.....                     | 1                  | 1       | seq |  |  |
| .....                                                           | ..uagguaagggGagucgg.....                     | 13                 | 1       | seq |  |  |
| .....                                                           | ..uagguaaggggaagucgC.....                    | 13                 | 1       | seq |  |  |
| .....                                                           | ..uGgguaaggggaagucgg.....                    | 3                  | 1       | seq |  |  |
| .....                                                           | ..uagguaaAgaagucgg.....                      | 1                  | 1       | seq |  |  |
| .....                                                           | ..uagAuaaggggaagucgg.....                    | 2                  | 1       | seq |  |  |
| .....                                                           | ..uagguaaaggUaaagucgg.....                   | 1                  | 1       | seq |  |  |
| .....                                                           | ..uagguaaggggaagucUg.....                    | 9                  | 1       | seq |  |  |
| .....                                                           | ..uaggGaaggggaagucgg.....                    | 1                  | 1       | seq |  |  |
| .....                                                           | ..uagguUaggggaagucgg.....                    | 1                  | 1       | seq |  |  |
| .....                                                           | ..Gagguaaggggaagucgg.....                    | 4                  | 1       | seq |  |  |
| .....                                                           | ..uagguaaggggaUucgg.....                     | 1                  | 1       | seq |  |  |
| .....                                                           | ..uagguaaggggaagCcg.....                     | 6                  | 1       | seq |  |  |
| .....                                                           | ..uagguaaggggaagAcgg.....                    | 1                  | 1       | seq |  |  |
| .....                                                           | ..uagguaaggggaagGcgg.....                    | 1                  | 1       | seq |  |  |
| .....                                                           | ..Aagguaaggggaagucgg.....                    | 2                  | 1       | seq |  |  |
| .....                                                           | ..uagguaaggggaagucCg.....                    | 5                  | 1       | seq |  |  |
| .....                                                           | ..uagguaagggUagucgg.....                     | 2                  | 1       | seq |  |  |
| .....                                                           | ..uagguaagggCagucgg.....                     | 2                  | 1       | seq |  |  |

# Mature Star

|                                                                 |                                                 |   |     |  |
|-----------------------------------------------------------------|-------------------------------------------------|---|-----|--|
| cacugaaaaauugaauuuguuuucaggucuccaagguaaacagucuuuggucaauagaacauu | uagguaaggggaagucggcaaacgaauccguaaacuucuaagugcaa |   |     |  |
| .....uUgguaaggggaagucggg.....                                   | 3                                               | 1 | seq |  |
| .....uaggAaaggggaagucggg.....                                   | 2                                               | 1 | seq |  |
| .....uagguaaggggaGgucggg.....                                   | 6                                               | 1 | seq |  |
| .....Nagguaaggggaagucggg.....                                   | 5                                               | 1 | seq |  |
| .....uagguaaggggaagucgggU.....                                  | 303                                             | 1 | seq |  |
| .....uGgguaaggggaagucgggc.....                                  | 7                                               | 1 | seq |  |
| .....uagguaagCgaagucgggc.....                                   | 2                                               | 1 | seq |  |
| .....uagguaaggggaagGcgggc.....                                  | 3                                               | 1 | seq |  |
| .....uagguaaggggaagucUgc.....                                   | 1                                               | 1 | seq |  |
| .....uagguaGgggaagucgggc.....                                   | 11                                              | 1 | seq |  |
| .....uagguaaggggUagucgggc.....                                  | 2                                               | 1 | seq |  |
| .....uagguaaggggaagAcgggc.....                                  | 3                                               | 1 | seq |  |
| .....uagguaaggggaagucgCc.....                                   | 8                                               | 1 | seq |  |
| .....Aagguaaggggaagucgggc.....                                  | 3                                               | 1 | seq |  |
| .....uagguaaggggaGgucgggc.....                                  | 6                                               | 1 | seq |  |
| .....uagguaaggggGagucgggc.....                                  | 9                                               | 1 | seq |  |
| .....uagguaaggggaAucgggc.....                                   | 1                                               | 1 | seq |  |
| .....uagguaaggggaagCcgggc.....                                  | 10                                              | 1 | seq |  |
| .....uagguaaggggaAucgggc.....                                   | 1                                               | 1 | seq |  |
| .....uagguaaggggaaguAggc.....                                   | 4                                               | 1 | seq |  |
| .....uagguaaggggaagucgggc.....                                  | 8                                               | 1 | seq |  |
| .....Gagguaaggggaagucgggc.....                                  | 5                                               | 1 | seq |  |
| .....uagguaaggggaagucgggc.....                                  | 2951                                            | 0 | seq |  |
| .....uagguaagggUaagucgggc.....                                  | 1                                               | 1 | seq |  |
| .....uagguaaggggaUucgggc.....                                   | 2                                               | 1 | seq |  |
| .....uagguaaggggaagucCcgc.....                                  | 2                                               | 1 | seq |  |
| .....uagAuaaggggaagucgggc.....                                  | 3                                               | 1 | seq |  |
| .....Nagguaaggggaagucgggc.....                                  | 3                                               | 1 | seq |  |
| .....uagCuaaggggaagucgggc.....                                  | 1                                               | 1 | seq |  |
| .....uaggCaaggggaagucgggc.....                                  | 1                                               | 1 | seq |  |
| .....uagguaaAggaagucgggc.....                                   | 3                                               | 1 | seq |  |
| .....uagUuaaggggaagucgggc.....                                  | 4                                               | 1 | seq |  |
| .....uaggGaaggggaagucgggc.....                                  | 2                                               | 1 | seq |  |
| .....uagguaagggUaagucgggca.....                                 | 5                                               | 1 | seq |  |
| .....uaggguCaggggaagucgggca.....                                | 1                                               | 1 | seq |  |
| .....uagguaagAgaagucgggca.....                                  | 2                                               | 1 | seq |  |
| .....uagguaaggggaUgucgggca.....                                 | 3                                               | 1 | seq |  |
| .....uagguaUgggaagucgggca.....                                  | 1                                               | 1 | seq |  |
| .....uagguaaAgaagucgggca.....                                   | 1                                               | 1 | seq |  |
| .....uaggguGaggggaagucgggca.....                                | 9                                               | 1 | seq |  |
| .....Nagguaaggggaagucgggca.....                                 | 6                                               | 1 | seq |  |
| .....uagguaaggggaAucgggca.....                                  | 3                                               | 1 | seq |  |
| .....uagguaaggggaagCcgggca.....                                 | 18                                              | 1 | seq |  |
| .....uagguaaUgggaagucgggca.....                                 | 1                                               | 1 | seq |  |
| .....uagguaaggggaGgucgggca.....                                 | 15                                              | 1 | seq |  |
| .....uagguaagggCaagucgggca.....                                 | 1                                               | 1 | seq |  |
| .....uagguaaggggaagAcgggca.....                                 | 4                                               | 1 | seq |  |
| .....uagguaaggggaagucgggUa.....                                 | 11                                              | 1 | seq |  |
| .....uaggCaaggggaagucgggca.....                                 | 15                                              | 1 | seq |  |
| .....uagguaaggggaCgucgggca.....                                 | 1                                               | 1 | seq |  |
| .....uagguaaggggaagucggcG.....                                  | 236                                             | 1 | seq |  |
| .....uagguaGgggaagucgggca.....                                  | 20                                              | 1 | seq |  |
| .....uagCuaaggggaagucgggca.....                                 | 2                                               | 1 | seq |  |
| .....uagguaaggggaagucggGca.....                                 | 7                                               | 1 | seq |  |
| .....uagguaaggggaaguGggca.....                                  | 2                                               | 1 | seq |  |
| .....uaggguUaggggaagucgggca.....                                | 1                                               | 1 | seq |  |
| .....uGgguaaggggaagucgggca.....                                 | 22                                              | 1 | seq |  |
| .....uagguaaggggaagucCgca.....                                  | 3                                               | 1 | seq |  |
| .....uagguaaggggaagucgUca.....                                  | 3                                               | 1 | seq |  |
| .....uagguaagUgaagucgggca.....                                  | 2                                               | 1 | seq |  |
| .....uagguaaggggaagGcgggca.....                                 | 4                                               | 1 | seq |  |
| .....uagguaaggggaagucUgc.....                                   | 2                                               | 1 | seq |  |
| .....uagguaaggggaagucggcC.....                                  | 17                                              | 1 | seq |  |
| .....Aagguaaggggaagucgggca.....                                 | 5                                               | 1 | seq |  |
| .....uagAuaaggggaagucgggca.....                                 | 3                                               | 1 | seq |  |
| .....uaggGaaggggaagucgggca.....                                 | 4                                               | 1 | seq |  |
| .....uUgguaaggggaagucgggca.....                                 | 3                                               | 1 | seq |  |
| .....uaggAaaggggaagucgggca.....                                 | 1                                               | 1 | seq |  |
| .....uagguaaggggaagucgCca.....                                  | 11                                              | 1 | seq |  |
| .....uagguaaggggaagucgggca.....                                 | 5715                                            | 0 | seq |  |

# Mature Star

|                                                                 |                                           |       |     |
|-----------------------------------------------------------------|-------------------------------------------|-------|-----|
| cacugaaaaauugaauuuguuuucaggucuccaagguaaacagucuuuggucaauagaacauu | uagguuaaggggaagucggcaaaacgaauccguaacuucua | gugca |     |
| .....uagguuaagggGagucggca.....                                  | 21                                        | 1     | seq |
| .....uagguuaaggggaagucggcU.....                                 | 40                                        | 1     | seq |
| .....uagguuaaggggaagUAggca.....                                 | 3                                         | 1     | seq |
| .....Gagguuaaggggaagucggca.....                                 | 8                                         | 1     | seq |
| .....uagguuaaggggUagucggca.....                                 | 5                                         | 1     | seq |
| .....uagguuaagggGagucggca.....                                  | 2                                         | 1     | seq |
| .....uagguuaagGAagucggcaa.....                                  | 1                                         | 1     | seq |
| .....uagguGaggggaagucggcaa.....                                 | 1                                         | 1     | seq |
| .....uaggCaaggggaagucggcaa.....                                 | 1                                         | 1     | seq |
| .....uagguuaaggggaUgucggcaa.....                                | 1                                         | 1     | seq |
| .....uGgguaaggggaagucggcaa.....                                 | 1                                         | 1     | seq |
| .....uagguuaaggggaagCcgga.....                                  | 3                                         | 1     | seq |
| .....uagguuaaggggaAucggcaa.....                                 | 1                                         | 1     | seq |
| .....uagguuaaggggaagucggcGa.....                                | 1                                         | 1     | seq |
| .....uagguuaaggggaagucggcCa.....                                | 1                                         | 1     | seq |
| .....uGgguaaggggaagucggcaa.....                                 | 1                                         | 1     | seq |
| .....uagguuaaggggaagCcgga.....                                  | 1                                         | 1     | seq |
| .....uagguuaaggggaagucggcaa.....                                | 424                                       | 0     | seq |
| .....Nagguuaaggggaagucggcaa.....                                | 1                                         | 1     | seq |
| .....uagguuaaggggaagucggcAU.....                                | 2                                         | 1     | seq |
| .....uaggGaaggggaagucggcaa.....                                 | 1                                         | 1     | seq |
| .....uagguuaaggggaagucggcAG.....                                | 6                                         | 1     | seq |
| .....uagguuaaggggaagucUGcaaa.....                               | 1                                         | 1     | seq |
| .....uGgguaaggggaagucggcaaaa.....                               | 2                                         | 1     | seq |
| .....uagguuaaggggaagucggcAGa.....                               | 4                                         | 1     | seq |
| .....uagguuaaggggaagAcggcaaaa.....                              | 1                                         | 1     | seq |
| .....uagguuaaggggaagucggcAGa.....                               | 1                                         | 1     | seq |
| .....uagguuaaggggaagCcgcaaaa.....                               | 2                                         | 1     | seq |
| .....uagguuaaggggaagucggcGaa.....                               | 1                                         | 1     | seq |
| .....Gagguuaaggggaagucggcaaaa.....                              | 1                                         | 1     | seq |
| .....uagguuaaggggaagUAggcaaaa.....                              | 1                                         | 1     | seq |
| .....uagguuaaggggaagucggcAG.....                                | 6                                         | 1     | seq |
| .....uagguuaaggggaagucggcaaaa.....                              | 423                                       | 0     | seq |
| .....uGgguaaggggaagucggcaaaa.....                               | 2                                         | 1     | seq |
| .....uagguuaaggggaagucggUaaa.....                               | 2                                         | 1     | seq |
| .....uagguuaagggGagucggcaaaa.....                               | 1                                         | 1     | seq |
| .....uagguuaaggggaagucggcaaU.....                               | 1                                         | 1     | seq |
| .....Nagguuaaggggaagucggcaaaa.....                              | 3                                         | 1     | seq |
| .....uagguuaGgggaagucggcaaaa.....                               | 2                                         | 1     | seq |
| .....Aagguuaaggggaagucggcaaaa.....                              | 2                                         | 1     | seq |
| .....uagguuaGgggaagucggcaaaaa.....                              | 1                                         | 1     | seq |
| .....uagguuaaggggaagucggcaaaaa.....                             | 180                                       | 0     | seq |
| .....uagguuaaggggaagucggcaaaaG.....                             | 1                                         | 1     | seq |
| .....uagguuaaggggaagCcggaaaaa.....                              | 1                                         | 1     | seq |
| .....uagguuaaggggaagucggcaaaaGc.....                            | 1                                         | 1     | seq |
| .....uagguuaaggggaagucggcaaaaac.....                            | 165                                       | 0     | seq |
| .....uagguuaaggggaagucggcaaaaA.....                             | 3                                         | 1     | seq |
| .....uGgguaaggggaagucggcaaaaac.....                             | 1                                         | 1     | seq |
| .....uagguuaagGAagucggcaaaaac.....                              | 1                                         | 1     | seq |
| .....uagguuaaggggaagucggcaaaaUc.....                            | 1                                         | 1     | seq |
| .....uagguuaaggggaagucggcaaGac.....                             | 1                                         | 1     | seq |
| .....uaggCaaggggaagucggcaaaaac.....                             | 1                                         | 1     | seq |
| .....uagguuaaggggaagucggcaaGacg.....                            | 2                                         | 1     | seq |
| .....uagguuaaggggaagucggcaaaaaAg.....                           | 1                                         | 1     | seq |
| .....uagguuaaggggaUgucggcaaaaacg.....                           | 1                                         | 1     | seq |
| .....uagguuaaggggaagucggcaaaaacU.....                           | 2                                         | 1     | seq |
| .....uagguuaaggggaagucggcaaaaGcg.....                           | 3                                         | 1     | seq |
| .....uagguuaGgggaagucggcaaaaacg.....                            | 1                                         | 1     | seq |
| .....Nagguuaaggggaagucggcaaaaacg.....                           | 2                                         | 1     | seq |
| .....uaggAaaggggaagucggcaaaaacg.....                            | 1                                         | 1     | seq |
| .....uagguuaaggggUagucggcaaaaacg.....                           | 1                                         | 1     | seq |
| .....Aagguuaaggggaagucggcaaaaacg.....                           | 1                                         | 1     | seq |
| .....uaggCaaggggaagucggcaaaaacg.....                            | 1                                         | 1     | seq |
| .....uagguuaaggggaagucggcaaaaacg.....                           | 466                                       | 0     | seq |
| .....uagguGaggggaagucggcaaaaacg.....                            | 1                                         | 1     | seq |
| .....uagguuaaggggaagucggcGaaaacg.....                           | 1                                         | 1     | seq |
| .....uagguuaaggggaagucggcaaaaacga.....                          | 38                                        | 0     | seq |
| .....uagguuaaggggaagucggcaaaaacgC.....                          | 3                                         | 1     | seq |
| .....uagguuaaggggaagucggcaaaaacgU.....                          | 9                                         | 1     | seq |
| .....uagguuaaggggaagucggcaaaaacgCa.....                         | 1                                         | 1     | seq |
| .....uagguuaaggggaagucggcaaaaacgaaucggu.....                    | 1                                         | 0     | seq |

# Mature Star

|                                                                                                               |      |   |     |
|---------------------------------------------------------------------------------------------------------------|------|---|-----|
| cacugaaaaauugaauuuguuuucaggucuccaagguaaacagucuuuggucaauagaacauuguagguaaggggaagucggcaaacgaauccguaacuucuagugcaa |      |   |     |
| .....uagguuaaggggaagucggcaaacgUauccgu.....                                                                    | 1    | 1 | seq |
| .....uagguuaaggggaagucggcaaacgaaucggu.....                                                                    | 2    | 0 | seq |
| .....uagguuaaggggaagucggcaaacgGauccguaacuucu.....                                                             | 2    | 1 | seq |
| .....Ngguuaaggggaagucggc.....                                                                                 | 5    | 1 | seq |
| .....agguuaaggggaagucCgc.....                                                                                 | 1    | 1 | seq |
| .....agguuaagAgaagucggc.....                                                                                  | 4    | 1 | seq |
| .....agguuaaggggaagucgCc.....                                                                                 | 10   | 1 | seq |
| .....aggCaaggggaagucggc.....                                                                                  | 11   | 1 | seq |
| .....agguuaaAggaagucggc.....                                                                                  | 2    | 1 | seq |
| .....Cgguuaaggggaagucggc.....                                                                                 | 5    | 1 | seq |
| .....agguuaaggggaaguAggc.....                                                                                 | 1    | 1 | seq |
| .....agguuaUggaagucggc.....                                                                                   | 1    | 1 | seq |
| .....agguuaagggGagucggc.....                                                                                  | 14   | 1 | seq |
| .....aggAaaggggaagucggc.....                                                                                  | 1    | 1 | seq |
| .....agguuaaggggaAucggc.....                                                                                  | 1    | 1 | seq |
| .....agguuaaCggaagucggc.....                                                                                  | 1    | 1 | seq |
| .....agguuaaggggaaguGggc.....                                                                                 | 1    | 1 | seq |
| .....agguuaaggggaagucggc.....                                                                                 | 18   | 1 | seq |
| .....agguuaaggggaagAcggc.....                                                                                 | 4    | 1 | seq |
| .....aggGaaggggaagucggc.....                                                                                  | 1    | 1 | seq |
| .....Ugguuaaggggaagucggc.....                                                                                 | 6    | 1 | seq |
| .....agAuaaggggaagucggc.....                                                                                  | 6    | 1 | seq |
| .....agguuaaggggaUgucggc.....                                                                                 | 1    | 1 | seq |
| .....agguuaGgggaagucggc.....                                                                                  | 8    | 1 | seq |
| .....agguuaaggggaUucggc.....                                                                                  | 2    | 1 | seq |
| .....agguuaagggGagucggc.....                                                                                  | 1    | 1 | seq |
| .....agguuaaggggaagGcggc.....                                                                                 | 5    | 1 | seq |
| .....agguuaaggggaagucUgc.....                                                                                 | 1    | 1 | seq |
| .....agguuaaggggaagCcggc.....                                                                                 | 9    | 1 | seq |
| .....agguuaaggggaagucggc.....                                                                                 | 3957 | 0 | seq |
| .....Ggguuaaggggaagucggc.....                                                                                 | 26   | 1 | seq |
| .....agguuaagggUagucggc.....                                                                                  | 2    | 1 | seq |
| .....agguuaaggggaGgucggc.....                                                                                 | 19   | 1 | seq |
| .....agguuaaUggaagucggca.....                                                                                 | 2    | 1 | seq |
| .....agguuaaggggaagucggcG.....                                                                                | 206  | 1 | seq |
| .....agguuaaggggaagucUgca.....                                                                                | 3    | 1 | seq |
| .....agguuaaggggaacCucggca.....                                                                               | 1    | 1 | seq |
| .....agguuaagAgaagucggca.....                                                                                 | 1    | 1 | seq |
| .....aggAaaggggaagucggca.....                                                                                 | 3    | 1 | seq |
| .....Ggguuaaggggaagucggca.....                                                                                | 22   | 1 | seq |
| .....agguuaGgggaagucggca.....                                                                                 | 8    | 1 | seq |
| .....agguuaaggggaUucggca.....                                                                                 | 1    | 1 | seq |
| .....agguuaaAggaagucggca.....                                                                                 | 3    | 1 | seq |
| .....agguuaagggUagucggca.....                                                                                 | 1    | 1 | seq |
| .....agguCaaggggaagucggca.....                                                                                | 1    | 1 | seq |
| .....Ngguuaaggggaagucggca.....                                                                                | 9    | 1 | seq |
| .....agguuaaggUaagucggca.....                                                                                 | 1    | 1 | seq |
| .....agguuaaggggaagucggcU.....                                                                                | 27   | 1 | seq |
| .....agguuaaggggaAucggca.....                                                                                 | 2    | 1 | seq |
| .....agguuaaggggaagucgUca.....                                                                                | 1    | 1 | seq |
| .....agUuaaggggaagucggca.....                                                                                 | 1    | 1 | seq |
| .....Cgguuaaggggaagucggca.....                                                                                | 4    | 1 | seq |
| .....agguuaaggggaagCcggca.....                                                                                | 9    | 1 | seq |
| .....agguuaaggggaagucgCca.....                                                                                | 8    | 1 | seq |
| .....agguuaaggggaagGcggca.....                                                                                | 2    | 1 | seq |
| .....agguuaUgggaagucggca.....                                                                                 | 3    | 1 | seq |
| .....agguuaCgggaagucggca.....                                                                                 | 1    | 1 | seq |
| .....agguuaaggggaagucggca.....                                                                                | 6000 | 0 | seq |
| .....aggCaaggggaagucggca.....                                                                                 | 7    | 1 | seq |
| .....agguuaaggggaGgucggca.....                                                                                | 24   | 1 | seq |
| .....agguGaggggaagucggca.....                                                                                 | 14   | 1 | seq |
| .....Ugguuaaggggaagucggca.....                                                                                | 3    | 1 | seq |
| .....agAuaaggggaagucggca.....                                                                                 | 8    | 1 | seq |
| .....agguuaaggggaaguGggca.....                                                                                | 1    | 1 | seq |
| .....agguuaagggGagucggca.....                                                                                 | 23   | 1 | seq |
| .....agguUaggggaagucggca.....                                                                                 | 2    | 1 | seq |
| .....agguuaaggggaUgucggca.....                                                                                | 2    | 1 | seq |
| .....agguuaaggggaagucggGa.....                                                                                | 3    | 1 | seq |
| .....aggGaaggggaagucggca.....                                                                                 | 4    | 1 | seq |
| .....agguuaaggggaagucggcC.....                                                                                | 15   | 1 | seq |

# Mature Star

|                                                                      |                                    |                    |         |   |     |  |
|----------------------------------------------------------------------|------------------------------------|--------------------|---------|---|-----|--|
| cacugaaaaaaauugaauuuuguuucagggucuccaagguaaacagucuuugggucaaauagaacauu | uguagguaaggggaagucggcaaa           | acgaauccguaacuucua | agugcaa |   |     |  |
| .....                                                                | agguuaaCggaagucggca                | .....              | 1       | 1 | seq |  |
| .....                                                                | agguuaaggggaagucCgca               | .....              | 4       | 1 | seq |  |
| .....                                                                | agguuaaggggaagAcggca               | .....              | 3       | 1 | seq |  |
| .....                                                                | agguuaaggggaagucggcaC              | .....              | 3       | 1 | seq |  |
| .....                                                                | agguuaaggggaagucggcaa              | .....              | 427     | 0 | seq |  |
| .....                                                                | Ggguaaggggaagucggcaa               | .....              | 3       | 1 | seq |  |
| .....                                                                | Ugguaaggggaagucggcaa               | .....              | 1       | 1 | seq |  |
| .....                                                                | Cgguaaggggaagucggcaa               | .....              | 2       | 1 | seq |  |
| .....                                                                | agguuaagggGagucggcaa               | .....              | 3       | 1 | seq |  |
| .....                                                                | agguuaaggggaagucggcaU              | .....              | 4       | 1 | seq |  |
| .....                                                                | agguuaaggggaagucGUcaa              | .....              | 2       | 1 | seq |  |
| .....                                                                | agguuaaggggaagucggcaG              | .....              | 11      | 1 | seq |  |
| .....                                                                | agguuaaggggaagucggcGa              | .....              | 3       | 1 | seq |  |
| .....                                                                | Ngguaaggggaagucggcaa               | .....              | 5       | 1 | seq |  |
| .....                                                                | agguuaagggGagucggcGaa              | .....              | 1       | 1 | seq |  |
| .....                                                                | agguuaGgggaagucggcaaa              | .....              | 1       | 1 | seq |  |
| .....                                                                | Ggguaaggggaagucggcaaa              | .....              | 2       | 1 | seq |  |
| .....                                                                | agguGaggggaagucggcaaa              | .....              | 1       | 1 | seq |  |
| .....                                                                | agAuaaggggaagucggcaaa              | .....              | 1       | 1 | seq |  |
| .....                                                                | agguuaagggGagucggcaaa              | .....              | 4       | 1 | seq |  |
| .....                                                                | agguuaaggggaagucggcaaa             | .....              | 389     | 0 | seq |  |
| .....                                                                | agguuaaggggaUucggcaaa              | .....              | 1       | 1 | seq |  |
| .....                                                                | agguuaaggggaGucggcaaa              | .....              | 2       | 1 | seq |  |
| .....                                                                | agguuaaggggaagucggcaaaG            | .....              | 4       | 1 | seq |  |
| .....                                                                | aggGaaaggggaagucggcaaa             | .....              | 1       | 1 | seq |  |
| .....                                                                | agguuaaggggaagucggcaaaC            | .....              | 2       | 1 | seq |  |
| .....                                                                | agguuaaggggaagucggcGa              | .....              | 6       | 1 | seq |  |
| .....                                                                | agguuaaggggaagucggcaaaG            | .....              | 1       | 1 | seq |  |
| .....                                                                | agguuaGgggaagucggcaaaa             | .....              | 1       | 1 | seq |  |
| .....                                                                | agguuaaggggaagucggcaaaa            | .....              | 181     | 0 | seq |  |
| .....                                                                | agguuaagggGagucggcaaaa             | .....              | 1       | 1 | seq |  |
| .....                                                                | Ggguaaggggaagucggcaaaaac           | .....              | 1       | 1 | seq |  |
| .....                                                                | agguuaaggggaagucggcaaaaac          | .....              | 157     | 0 | seq |  |
| .....                                                                | agguuaaUgggaagucggcaaaaacg         | .....              | 1       | 1 | seq |  |
| .....                                                                | agguuaaggggaagucggcaaaaacC         | .....              | 2       | 1 | seq |  |
| .....                                                                | agguuaaggggaagucggcGaaaacg         | .....              | 2       | 1 | seq |  |
| .....                                                                | agguuaGgggaagucggcaaaaacg          | .....              | 3       | 1 | seq |  |
| .....                                                                | agguuaaggggaUucggcaaaaacg          | .....              | 1       | 1 | seq |  |
| .....                                                                | agguuaaggggaagucggcaaaaGcg         | .....              | 2       | 1 | seq |  |
| .....                                                                | agguuaaggggaagucggcaaaaacg         | .....              | 324     | 0 | seq |  |
| .....                                                                | agguuaaggggaGucggcaaaaacg          | .....              | 1       | 1 | seq |  |
| .....                                                                | Ggguaaggggaagucggcaaaaacg          | .....              | 1       | 1 | seq |  |
| .....                                                                | agguuaagggGagucggcaaaaacg          | .....              | 3       | 1 | seq |  |
| .....                                                                | Cgguaaggggaagucggcaaaaacg          | .....              | 1       | 1 | seq |  |
| .....                                                                | agguuaaggggaagucggAaaaacga         | .....              | 1       | 1 | seq |  |
| .....                                                                | agguuaaggggaagCcggaaaaacga         | .....              | 1       | 1 | seq |  |
| .....                                                                | agguuaaggggaagucggcaaaaacgC        | .....              | 1       | 1 | seq |  |
| .....                                                                | agguuaaggggaagucggcaaaaacgU        | .....              | 2       | 1 | seq |  |
| .....                                                                | Ngguaaggggaagucggcaaaaacga         | .....              | 1       | 1 | seq |  |
| .....                                                                | agguuaaAggaagucggcaaaaacga         | .....              | 1       | 1 | seq |  |
| .....                                                                | agguuaagggUaagucggcaaaaacga        | .....              | 1       | 1 | seq |  |
| .....                                                                | agguuaaggggaagucggcaaaaacga        | .....              | 24      | 0 | seq |  |
| .....                                                                | agguuaaggggaagucggcaaaaacgaUu      | .....              | 1       | 1 | seq |  |
| .....                                                                | agguuaaggggaagucggcaaaaacgCauccg   | .....              | 1       | 1 | seq |  |
| .....                                                                | agguuaaggggaagucggcaaaaacgaauccgua | .....              | 2       | 0 | seq |  |
| .....                                                                | gguaaggggaagucggcU                 | .....              | 30      | 1 | seq |  |
| .....                                                                | Nguaaggggaagucggca                 | .....              | 11      | 1 | seq |  |
| .....                                                                | gguaaggggaagucggca                 | .....              | 5520    | 0 | seq |  |
| .....                                                                | gguaaggggaagucGUca                 | .....              | 2       | 1 | seq |  |
| .....                                                                | gguaaggggaagCcgga                  | .....              | 17      | 1 | seq |  |
| .....                                                                | Cguaaggggaagucggca                 | .....              | 1       | 1 | seq |  |
| .....                                                                | ggAaaggggaagucggca                 | .....              | 1       | 1 | seq |  |
| .....                                                                | gguaaggggaGucggca                  | .....              | 19      | 1 | seq |  |
| .....                                                                | gguaagggGagucggca                  | .....              | 14      | 1 | seq |  |
| .....                                                                | gguaaggggaCucggca                  | .....              | 2       | 1 | seq |  |
| .....                                                                | ggCaaggggaagucggca                 | .....              | 4       | 1 | seq |  |
| .....                                                                | gguaaggggaagAcggca                 | .....              | 1       | 1 | seq |  |
| .....                                                                | gguaaAggaagucggca                  | .....              | 1       | 1 | seq |  |
| .....                                                                | gguaaggggaagucggcC                 | .....              | 12      | 1 | seq |  |
| .....                                                                | gguCaggggaagucggca                 | .....              | 1       | 1 | seq |  |

# Mature Star

|                                                                                                                   |     |   |     |
|-------------------------------------------------------------------------------------------------------------------|-----|---|-----|
| cacugaaaaauugaauuuuguuucagggucuccaagguaaacagucuuugggucaauagaacauuguagguaaggggaagucggcaaacggauccgguaacuucuaugugcaa |     |   |     |
| .....gguGaggggaagucggca.....                                                                                      | 7   | 1 | seq |
| .....gguaaggggaCgucggca.....                                                                                      | 1   | 1 | seq |
| .....gguaaggggaagGcggca.....                                                                                      | 1   | 1 | seq |
| .....gguaaggggaagucggca.....                                                                                      | 1   | 1 | seq |
| .....gguaaggggaagucGca.....                                                                                       | 11  | 1 | seq |
| .....gguaaggggaagucCgca.....                                                                                      | 4   | 1 | seq |
| .....gguaagUggaagucggca.....                                                                                      | 3   | 1 | seq |
| .....gguaaUggaagucggca.....                                                                                       | 3   | 1 | seq |
| .....gguaaggggaagucggcG.....                                                                                      | 195 | 1 | seq |
| .....gguaagAgaagucggca.....                                                                                       | 3   | 1 | seq |
| .....gguaCgggaagucggca.....                                                                                       | 2   | 1 | seq |
| .....gguaaggggaagucggGa.....                                                                                      | 8   | 1 | seq |
| .....gguaagggCaagucggca.....                                                                                      | 2   | 1 | seq |
| .....gguaaggggaAucggca.....                                                                                       | 1   | 1 | seq |
| .....gguaUgggaagucggca.....                                                                                       | 3   | 1 | seq |
| .....gguaaggggaUucggca.....                                                                                       | 2   | 1 | seq |
| .....gguaagggUaagucggca.....                                                                                      | 3   | 1 | seq |
| .....gguaGgggaagucggca.....                                                                                       | 17  | 1 | seq |
| .....gguaagggUagucggca.....                                                                                       | 5   | 1 | seq |
| .....ggGaaggggaagucggca.....                                                                                      | 8   | 1 | seq |
| .....gUuaaggggaagucggca.....                                                                                      | 6   | 1 | seq |
| .....gguaaggggaagUaggca.....                                                                                      | 2   | 1 | seq |
| .....gAuaaggggaagucggca.....                                                                                      | 2   | 1 | seq |
| .....gguaaggggaagucggcaa.....                                                                                     | 365 | 0 | seq |
| .....ggCaaggggaagucggcaa.....                                                                                     | 1   | 1 | seq |
| .....gguGaggggaagucggcaa.....                                                                                     | 1   | 1 | seq |
| .....gguaaggggaGucggcaa.....                                                                                      | 2   | 1 | seq |
| .....gguaaggggaagucggcGa.....                                                                                     | 3   | 1 | seq |
| .....gguaaggggaagucggcCa.....                                                                                     | 1   | 1 | seq |
| .....gguaaggggaagucggcGaG.....                                                                                    | 6   | 1 | seq |
| .....Nguaggggaagucggcaa.....                                                                                      | 1   | 1 | seq |
| .....gguaaggggaagCcggcaaa.....                                                                                    | 2   | 1 | seq |
| .....gguaaggggaagucggcaaG.....                                                                                    | 2   | 1 | seq |
| .....gguaaggggaagucggcaaa.....                                                                                    | 318 | 0 | seq |
| .....Nguaggggaagucggcaaa.....                                                                                     | 1   | 1 | seq |
| .....gguaaggggaagucggUaaa.....                                                                                    | 1   | 1 | seq |
| .....gguaGgggaagucggcaaa.....                                                                                     | 1   | 1 | seq |
| .....gUuaaggggaagucggcaaa.....                                                                                    | 1   | 1 | seq |
| .....gguaaggggaGucggcaaa.....                                                                                     | 1   | 1 | seq |
| .....gguGaggggaagucggcaaa.....                                                                                    | 1   | 1 | seq |
| .....gguaaggggaagUggcaaa.....                                                                                     | 1   | 1 | seq |
| .....gguaaggggaagucggcaaaG.....                                                                                   | 1   | 1 | seq |
| .....gguaGgggaagucggcaaaa.....                                                                                    | 1   | 1 | seq |
| .....gguaaggggaagucCgcacaaa.....                                                                                  | 1   | 1 | seq |
| .....gguaaAaggaagucggcaaaa.....                                                                                   | 1   | 1 | seq |
| .....gguaagggGagucggcaaaa.....                                                                                    | 1   | 1 | seq |
| .....gguaaggggaagucggcGa.....                                                                                     | 1   | 1 | seq |
| .....gguaaggggaUucggcaaaa.....                                                                                    | 1   | 1 | seq |
| .....gguaaUggaagucggcaaaa.....                                                                                    | 1   | 1 | seq |
| .....gguaaggggaagucggcaaaa.....                                                                                   | 153 | 0 | seq |
| .....gguaaggggaGucggcaaaaC.....                                                                                   | 1   | 1 | seq |
| .....gguaaggggaagucggcaaaaC.....                                                                                  | 144 | 0 | seq |
| .....gguaaggggaagucggcaaGac.....                                                                                  | 2   | 1 | seq |
| .....gguaaggggaagucggGaaaC.....                                                                                   | 1   | 1 | seq |
| .....gguaaggggaagucggcaaaaC.....                                                                                  | 1   | 1 | seq |
| .....gguaaggggaagucggcaaaaCg.....                                                                                 | 2   | 1 | seq |
| .....gguaaggggaGucggcaaaaCg.....                                                                                  | 2   | 1 | seq |
| .....gguaaggggaagucGcaaaaCg.....                                                                                  | 1   | 1 | seq |
| .....UguaaggggaagucggcaaaaCg.....                                                                                 | 1   | 1 | seq |
| .....gguaagggUagucggcaaaaCg.....                                                                                  | 1   | 1 | seq |
| .....gguaaggggaagucggcaaUacg.....                                                                                 | 1   | 1 | seq |
| .....gguaagUgaagucggcaaaaCg.....                                                                                  | 1   | 1 | seq |
| .....gguaaggggaagucggcaaaaCg.....                                                                                 | 417 | 0 | seq |
| .....gguaaggggaagucggcGaGaacg.....                                                                                | 1   | 1 | seq |
| .....gguaaggggaagCcgcaaaaCg.....                                                                                  | 3   | 1 | seq |
| .....gguaaggggaagucggcaaaaCU.....                                                                                 | 1   | 1 | seq |
| .....gguaaggggaagucggcaaaaCC.....                                                                                 | 3   | 1 | seq |



# Mature Star

|                                                                                                               |     |   |     |
|---------------------------------------------------------------------------------------------------------------|-----|---|-----|
| cacugaaaaauugaauuuuguuucaggucuccaagguaaacagucuuuggucaauagaacauuguagguaaggggaagucggcaaacgaauccguaacuucuagugcaa |     |   |     |
| .....gguaaggggaagAcggcaaaacg.....                                                                             | 2   | 1 | seq |
| .....gguaaggggaagucggcaaGacg.....                                                                             | 3   | 1 | seq |
| .....gguaagggGagucggcaaaacga.....                                                                             | 1   | 1 | seq |
| .....gguaaggggaagucggcaaaacgC.....                                                                            | 1   | 1 | seq |
| .....gguaaggggaagucggcaaaacgU.....                                                                            | 6   | 1 | seq |
| .....gguaaggggaagucggcaaaacga.....                                                                            | 32  | 0 | seq |
| .....gguaaggggaagucggcaaaacgCa.....                                                                           | 1   | 1 | seq |
| .....gguaaggggaagucggcaaaacgaa.....                                                                           | 1   | 0 | seq |
| .....gguaaggggaagucggcaaaacgaauc.....                                                                         | 1   | 0 | seq |
| .....gguaaggggaagucggcaaaacgaaucCGU.....                                                                      | 1   | 0 | seq |
| .....gguaaggggaagucggcaaaacgUaucggu.....                                                                      | 1   | 1 | seq |
| .....gguaaggggaagucggcaaaacgaaucCGuaacC.....                                                                  | 1   | 1 | seq |
| .....gguaaggggaagucggcaaaacgGauccguaacuucu.....                                                               | 1   | 1 | seq |
| .....guaaggggaagucggGaa.....                                                                                  | 1   | 1 | seq |
| .....guaaggggaagAcggcaa.....                                                                                  | 1   | 1 | seq |
| .....guaaggggaGgucggcaa.....                                                                                  | 3   | 1 | seq |
| .....gCaaggggaagucggcaa.....                                                                                  | 2   | 1 | seq |
| .....guUaggggaagucggcaa.....                                                                                  | 1   | 1 | seq |
| .....guaagggUagucggcaa.....                                                                                   | 2   | 1 | seq |
| .....Nuaaggggaagucggcaa.....                                                                                  | 1   | 1 | seq |
| .....guGaggggaagucggcaa.....                                                                                  | 1   | 1 | seq |
| .....Uuaaggggaagucggcaa.....                                                                                  | 1   | 1 | seq |
| .....guaaggggaagucggcGa.....                                                                                  | 5   | 1 | seq |
| .....guaaggggaagucggcaa.....                                                                                  | 372 | 0 | seq |
| .....guaaggggaagucggcAG.....                                                                                  | 11  | 1 | seq |
| .....guaaggggaagucggcAU.....                                                                                  | 8   | 1 | seq |
| .....guaagGgaagucggcaa.....                                                                                   | 1   | 1 | seq |
| .....Auaaggggaagucggcaa.....                                                                                  | 1   | 1 | seq |
| .....guaaggggaagucggUaaa.....                                                                                 | 1   | 1 | seq |
| .....Uuaaggggaagucggcaaaa.....                                                                                | 1   | 1 | seq |
| .....Auaaggggaagucggcaaaa.....                                                                                | 2   | 1 | seq |
| .....guaaggggaagucggcGaa.....                                                                                 | 1   | 1 | seq |
| .....gCaaggggaagucggcaaaa.....                                                                                | 1   | 1 | seq |
| .....guaaggggaagucggcaaU.....                                                                                 | 1   | 1 | seq |
| .....guaaggggaGgucggcaaaa.....                                                                                | 1   | 1 | seq |
| .....guaUgggaagucggcaaaa.....                                                                                 | 1   | 1 | seq |
| .....guaGgggaagucggcaaaa.....                                                                                 | 1   | 1 | seq |
| .....guaaggggaagucggcaaG.....                                                                                 | 4   | 1 | seq |
| .....guaagGgaagucggcaaaa.....                                                                                 | 1   | 1 | seq |
| .....guaaggggaagucUgcaaaa.....                                                                                | 1   | 1 | seq |
| .....guaaggggaagCcggcaaaa.....                                                                                | 2   | 1 | seq |
| .....guaaggggaagucggcaaaa.....                                                                                | 280 | 0 | seq |
| .....guaGgggaagucggcaaaa.....                                                                                 | 1   | 1 | seq |
| .....guaaggggaagucggcaaaa.....                                                                                | 142 | 0 | seq |
| .....guaaggggaagucggcaaGaa.....                                                                               | 1   | 1 | seq |
| .....guaaggggaAucggcaaaac.....                                                                                | 1   | 1 | seq |
| .....guaaggggaagucggcAUaac.....                                                                               | 1   | 1 | seq |
| .....guaaggggaUgucggcaaaac.....                                                                               | 1   | 1 | seq |
| .....guaaggggaagucggcaaGac.....                                                                               | 1   | 1 | seq |
| .....guaaggggaagucggcaaaGc.....                                                                               | 2   | 1 | seq |
| .....guaaggggaGgucggcaaaac.....                                                                               | 1   | 1 | seq |
| .....guaaggggaagucggUaaaac.....                                                                               | 1   | 1 | seq |
| .....guaaggggaagucggcaaaac.....                                                                               | 172 | 0 | seq |
| .....gCaaggggaagucggcaaaac.....                                                                               | 1   | 1 | seq |
| .....guaaggggaagucggcGaaacg.....                                                                              | 2   | 1 | seq |
| .....guaagggGagucggcaaaacg.....                                                                               | 1   | 1 | seq |
| .....guaUgggaagucggcaaaacg.....                                                                               | 1   | 1 | seq |
| .....Auaaggggaagucggcaaaacg.....                                                                              | 1   | 1 | seq |
| .....guaaggggaGgucggcaaaacg.....                                                                              | 1   | 1 | seq |
| .....guaaggggaagucggUaaaacg.....                                                                              | 1   | 1 | seq |
| .....guaaggggaagucggcaaaacg.....                                                                              | 406 | 0 | seq |
| .....guaGgggaagucggcaaaacg.....                                                                               | 3   | 1 | seq |
| .....guaaggggaagucggcaaAGcg.....                                                                              | 1   | 1 | seq |
| .....guaaggggaagucggcGaacg.....                                                                               | 2   | 1 | seq |
| .....guUaggggaagucggcaaaacg.....                                                                              | 1   | 1 | seq |
| .....Uuaaggggaagucggcaaaacg.....                                                                              | 2   | 1 | seq |
| .....guaaggggaagucggcaaaacU.....                                                                              | 1   | 1 | seq |
| .....guaagGgaagucggcaaaacg.....                                                                               | 1   | 1 | seq |
| .....guaaggggaagucggcaaGacg.....                                                                              | 1   | 1 | seq |
| .....guaaggggaagucggcaaaacC.....                                                                              | 2   | 1 | seq |

# Mature Star

|                                                                 |                                                 |      |   |     |
|-----------------------------------------------------------------|-------------------------------------------------|------|---|-----|
| cacugaaaaaaugaaauuguuuucaggucuccaagguaaacagucuuuggucaauagaacauu | guagguaagggaaagucggcaaacgaauccguaacuucuaagugcaa |      |   |     |
| .....                                                           | guagggaagucggcaaaUacg.....                      | 1    | 1 | seq |
| .....                                                           | guaaAggaagucggcaaaacg.....                      | 1    | 1 | seq |
| .....                                                           | guGagggaagucggcaaaacg.....                      | 1    | 1 | seq |
| .....                                                           | guagggaagucggcaaaacgU.....                      | 3    | 1 | seq |
| .....                                                           | guagggaagucggcaaaacga.....                      | 44   | 0 | seq |
| .....                                                           | guaaUggaagucggcaaaacga.....                     | 1    | 1 | seq |
| .....                                                           | guagggaagucggcaaGacga.....                      | 1    | 1 | seq |
| .....                                                           | guagggaagucggcaaaacgC.....                      | 1    | 1 | seq |
| .....                                                           | guagggaagucggcaaaacgUau.....                    | 1    | 1 | seq |
| .....                                                           | guagggaagucggcaaaacgUauccgua.....               | 1    | 1 | seq |
| .....                                                           | guagggaagucggcaaaacgaauccguaac.....             | 2    | 0 | seq |
| .....                                                           | guagggaagucggcaaaacgUauccguaac.....             | 1    | 1 | seq |
| .....                                                           | uaagggaagucggUaaa.....                          | 2    | 1 | seq |
| .....                                                           | uaagggaagucggcGaa.....                          | 2    | 1 | seq |
| .....                                                           | uaagggaagucggcaaaa.....                         | 696  | 0 | seq |
| .....                                                           | uaagggaagCcggaaaa.....                          | 3    | 1 | seq |
| .....                                                           | uaagggaagucggcGaa.....                          | 1    | 1 | seq |
| .....                                                           | uaGgggaagucggcaaaa.....                         | 2    | 1 | seq |
| .....                                                           | uaagggaagucggcaaC.....                          | 1    | 1 | seq |
| .....                                                           | uaagggaagucggcaaG.....                          | 16   | 1 | seq |
| .....                                                           | uUagggaagucggcaaaa.....                         | 1    | 1 | seq |
| .....                                                           | uaaggGagucggcaaaa.....                          | 2    | 1 | seq |
| .....                                                           | Caagggaagucggcaaaa.....                         | 1    | 1 | seq |
| .....                                                           | uaagggaGgucggcaaaa.....                         | 4    | 1 | seq |
| .....                                                           | uaagggaagAcggcaaaa.....                         | 3    | 1 | seq |
| .....                                                           | uGagggaagucggcaaaa.....                         | 2    | 1 | seq |
| .....                                                           | uaaUggaagucggcaaaa.....                         | 1    | 1 | seq |
| .....                                                           | uaagAgaagucggcaaaa.....                         | 1    | 1 | seq |
| .....                                                           | uaagggaUgucggcaaaa.....                         | 1    | 1 | seq |
| .....                                                           | uaagggaagucggcaaaG.....                         | 4    | 1 | seq |
| .....                                                           | uaagggaagucggcaaGaa.....                        | 1    | 1 | seq |
| .....                                                           | uaagggaagucggcaaaa.....                         | 315  | 0 | seq |
| .....                                                           | uaagggaagucggcGaa.....                          | 2    | 1 | seq |
| .....                                                           | uaGgggaagucggcaaaa.....                         | 1    | 1 | seq |
| .....                                                           | uaagggaGgucggcaaaa.....                         | 1    | 1 | seq |
| .....                                                           | uaagggaagucggUaaaac.....                        | 1    | 1 | seq |
| .....                                                           | Caagggaagucggcaaaac.....                        | 2    | 1 | seq |
| .....                                                           | uaagggaagucggcaaaac.....                        | 323  | 0 | seq |
| .....                                                           | uaagggaagucggcaaaCc.....                        | 1    | 1 | seq |
| .....                                                           | uaagggaagucggcGaaC.....                         | 1    | 1 | seq |
| .....                                                           | uaagggaagucggcaaGac.....                        | 1    | 1 | seq |
| .....                                                           | uaagggaagucggcaUaac.....                        | 1    | 1 | seq |
| .....                                                           | uaagggaagucUgcaaaac.....                        | 1    | 1 | seq |
| .....                                                           | uaagggaGgucggcaaaac.....                        | 1    | 1 | seq |
| .....                                                           | uaagggaagCcggaaaac.....                         | 1    | 1 | seq |
| .....                                                           | uaagAgaagucggcaaaac.....                        | 1    | 1 | seq |
| .....                                                           | uaGgggaagucggcaaaac.....                        | 1    | 1 | seq |
| .....                                                           | uUagggaagucggcaaaacg.....                       | 1    | 1 | seq |
| .....                                                           | uaagggaagugggcaaaacg.....                       | 1    | 1 | seq |
| .....                                                           | uaagggaagCcggaaaacg.....                        | 1    | 1 | seq |
| .....                                                           | Caagggaagucggcaaaacg.....                       | 7    | 1 | seq |
| .....                                                           | Naagggaagucggcaaaacg.....                       | 2    | 1 | seq |
| .....                                                           | uaGgggaagucggcaaaacg.....                       | 4    | 1 | seq |
| .....                                                           | uaagggaagucggcaaUacg.....                       | 2    | 1 | seq |
| .....                                                           | uaagggaagucggUaaaacg.....                       | 2    | 1 | seq |
| .....                                                           | uaagggaagucggcaaaCc.....                        | 1    | 1 | seq |
| .....                                                           | uaagggaagAcggcaaaacg.....                       | 1    | 1 | seq |
| .....                                                           | uaagAgaagucggcaaaacg.....                       | 2    | 1 | seq |
| .....                                                           | Gaagggaagucggcaaaacg.....                       | 1    | 1 | seq |
| .....                                                           | uaagggaagucggcGaaacg.....                       | 4    | 1 | seq |
| .....                                                           | uaagggaagucggcaaaacC.....                       | 2    | 1 | seq |
| .....                                                           | uaagggaagucggcaUaacg.....                       | 1    | 1 | seq |
| .....                                                           | uaagggaGgucggcaaaacg.....                       | 10   | 1 | seq |
| .....                                                           | uaagggaagucggcaaGacg.....                       | 8    | 1 | seq |
| .....                                                           | uaagggaagucggcGaaacg.....                       | 3    | 1 | seq |
| .....                                                           | uGagggaagucggcaaaacg.....                       | 3    | 1 | seq |
| .....                                                           | uaaggGagucggcaaaacg.....                        | 3    | 1 | seq |
| .....                                                           | uaagggaagucggcaaaacg.....                       | 1276 | 0 | seq |
| .....                                                           | uaagggaagucggcaaaacU.....                       | 5    | 1 | seq |
| .....                                                           | Aaagggaagucggcaaaacg.....                       | 1    | 1 | seq |

# Mature Star

|                                                                                                               |     |   |     |
|---------------------------------------------------------------------------------------------------------------|-----|---|-----|
| cacugaaaaauugaauuuguuucaggucuccaagguaaacagucuuuggucaauagaacauuguagguaaggggaagucggcaaacgaauccguaacuucuaugugcaa |     |   |     |
| .....uaaggggaagucggcaaaaGg.....                                                                               | 1   | 1 | seq |
| .....uaaggggaagucggcaaaaGcg.....                                                                              | 2   | 1 | seq |
| .....uaaggggaauUucggcaaaaacg.....                                                                             | 1   | 1 | seq |
| .....uaaUggaagucggcaaaaacg.....                                                                               | 1   | 1 | seq |
| .....uaaggggCagucggcaaaaacg.....                                                                              | 1   | 1 | seq |
| .....uaaggggaagucggGaaaacg.....                                                                               | 1   | 1 | seq |
| .....uaaggggaGucggcaaaaacga.....                                                                              | 1   | 1 | seq |
| .....uaaggggaagucggcaaaaacgU.....                                                                             | 20  | 1 | seq |
| .....uaaggggaagucggcaaaaacga.....                                                                             | 135 | 0 | seq |
| .....uaaggggaagucggcaaGacga.....                                                                              | 2   | 1 | seq |
| .....uGaggggaagucggcaaaaacga.....                                                                             | 1   | 1 | seq |
| .....uaaggggaagucggcaaaaacgC.....                                                                             | 13  | 1 | seq |
| .....uaaggggaagucggcaaaaacCa.....                                                                             | 1   | 1 | seq |
| .....uaaggggaagCcgggcaaaaacga.....                                                                            | 1   | 1 | seq |
| .....uaaggggaagucggcaaaaacgaa.....                                                                            | 1   | 0 | seq |
| .....uaaggggaagucggcaaaaacgUau.....                                                                           | 1   | 1 | seq |
| .....uaaggggaagucggcaaaaacgaauccC.....                                                                        | 1   | 1 | seq |
| .....uaaggggaagucggcaaaaacgaauccgua.....                                                                      | 2   | 0 | seq |
| .....uaaggggaagucggcaaaaacgUauccguaacu.....                                                                   | 1   | 1 | seq |
| .....aaggggaagucggcaaaaG.....                                                                                 | 1   | 1 | seq |
| .....aaggggaagucggcaaaaC.....                                                                                 | 1   | 1 | seq |
| .....aaggggaauUucggcaaaa.....                                                                                 | 1   | 1 | seq |
| .....aGgggaagucggcaaaa.....                                                                                   | 1   | 1 | seq |
| .....aaggggaagucggcaaaa.....                                                                                  | 94  | 0 | seq |
| .....aaggggaGucggcaaaa.....                                                                                   | 1   | 1 | seq |
| .....aaggggaagucggcGaaa.....                                                                                  | 1   | 1 | seq |
| .....aGgggaagucggcaaaaac.....                                                                                 | 1   | 1 | seq |
| .....aaggggaagucggcaaGac.....                                                                                 | 1   | 1 | seq |
| .....Gaggggaagucggcaaaaac.....                                                                                | 3   | 1 | seq |
| .....aaggggaagCcgggcaaaaac.....                                                                               | 1   | 1 | seq |
| .....aaggggaagucggcaaaaac.....                                                                                | 143 | 0 | seq |
| .....aaggggaagucggcaGaacg.....                                                                                | 1   | 1 | seq |
| .....Caggggaagucggcaaaaacg.....                                                                               | 1   | 1 | seq |
| .....aaggggaagCcgggcaaaaacg.....                                                                              | 1   | 1 | seq |
| .....aaggggaaguGggcaaaaacg.....                                                                               | 1   | 1 | seq |
| .....aaggggaagucggcaaaaacC.....                                                                               | 3   | 1 | seq |
| .....aaggggGagucggcaaaaacg.....                                                                               | 2   | 1 | seq |
| .....aaggggaagucggUaaaacg.....                                                                                | 2   | 1 | seq |
| .....aaUggaagucggcaaaaacg.....                                                                                | 1   | 1 | seq |
| .....aGgggaagucggcaaaaacg.....                                                                                | 3   | 1 | seq |
| .....aaggggaGucggcaaaaacg.....                                                                                | 1   | 1 | seq |
| .....Naaggggaagucggcaaaaacg.....                                                                              | 2   | 1 | seq |
| .....aaggggaagucggcaaaaUcg.....                                                                               | 1   | 1 | seq |
| .....aaggggaagucggcaaaaacU.....                                                                               | 1   | 1 | seq |
| .....Uaggggaagucggcaaaaacg.....                                                                               | 2   | 1 | seq |
| .....aaggggaagucggcaaaaacg.....                                                                               | 355 | 0 | seq |
| .....aaggggaagucUgcaaaaacg.....                                                                               | 1   | 1 | seq |
| .....aaggggaauUucggcaaaaacg.....                                                                              | 1   | 1 | seq |
| .....Gaggggaagucggcaaaaacg.....                                                                               | 3   | 1 | seq |
| .....aaggggaagAcggcaaaaacg.....                                                                               | 1   | 1 | seq |
| .....aaggggaagucggcGaaaacg.....                                                                               | 2   | 1 | seq |
| .....aaggggaagCcgggcaaaaacga.....                                                                             | 1   | 1 | seq |
| .....aaAggaagucggcaaaaacga.....                                                                               | 1   | 1 | seq |
| .....aaggggaagucggcaaaaacgU.....                                                                              | 6   | 1 | seq |
| .....aaggggaagucggcGaacga.....                                                                                | 1   | 1 | seq |
| .....aaggggaagucggcGaaaacga.....                                                                              | 1   | 1 | seq |
| .....aaggggaagucggcaaaaacga.....                                                                              | 47  | 0 | seq |
| .....aaggggaagucggcaaaaacgC.....                                                                              | 2   | 1 | seq |
| .....aaggggaagucggcaaaaacgUa.....                                                                             | 1   | 1 | seq |
| .....aaggggaagucggcaaaaacgaUuc.....                                                                           | 1   | 1 | seq |
| .....aaggggaagucggcaaaaacgCauccg.....                                                                         | 1   | 1 | seq |
| .....aaggggaagucggcaaaaacgUauccguaaac.....                                                                    | 1   | 1 | seq |
| .....aaggggaagucggcaaaaacgaauccguaacu.....                                                                    | 1   | 0 | seq |
| .....aaggggaagucggcaaaaacgGauccguaacuucu.....                                                                 | 1   | 1 | seq |
| .....aggggaagucggcaaGac.....                                                                                  | 3   | 1 | seq |
| .....aggggaagucggcGaaac.....                                                                                  | 2   | 1 | seq |
| .....aggggaagucggcaaCac.....                                                                                  | 1   | 1 | seq |
| .....aggggaagucggcGaac.....                                                                                   | 1   | 1 | seq |
| .....agCgaagucggcaaaaac.....                                                                                  | 1   | 1 | seq |
| .....Ugggaagucggcaaaaac.....                                                                                  | 1   | 1 | seq |

# Mature Star

|                                                                                                                 |      |   |     |
|-----------------------------------------------------------------------------------------------------------------|------|---|-----|
| cacugaaaaauugaauuguuuucagggucuccaagguaaacagucuuugggucaauagaacauuguagguaaggggaagucggcaaacgaauccguaacuucuaugugcaa |      |   |     |
| .....aggggaagucggUaaaac.....                                                                                    | 1    | 1 | seq |
| .....aggggaagucggcaaaaG.....                                                                                    | 1    | 1 | seq |
| .....aggggaagucggcaaaaGc.....                                                                                   | 8    | 1 | seq |
| .....aggggaGgucggcaaaaac.....                                                                                   | 2    | 1 | seq |
| .....aggggaacCucggcaaaaac.....                                                                                  | 1    | 1 | seq |
| .....aggggaagGcggcaaaaac.....                                                                                   | 1    | 1 | seq |
| .....Ggggaagucggcaaaaac.....                                                                                    | 1    | 1 | seq |
| .....aggUaagucggcaaaaac.....                                                                                    | 2    | 1 | seq |
| .....aAggaagucggcaaaaac.....                                                                                    | 1    | 1 | seq |
| .....aggggaagucggcaaaaac.....                                                                                   | 759  | 0 | seq |
| .....aggggaUucggcaaaaac.....                                                                                    | 1    | 1 | seq |
| .....aggggaagucggcaaaaacg.....                                                                                  | 1    | 1 | seq |
| .....Cgggaagucggcaaaaacg.....                                                                                   | 1    | 1 | seq |
| .....aggggaagucggcaaGacg.....                                                                                   | 5    | 1 | seq |
| .....aggggaagucggcaaaaacC.....                                                                                  | 9    | 1 | seq |
| .....agggUagucggcaaaaacg.....                                                                                   | 2    | 1 | seq |
| .....aAggaagucggcaaaaacg.....                                                                                   | 1    | 1 | seq |
| .....aggggaagucggGaaaacg.....                                                                                   | 1    | 1 | seq |
| .....aggggaagucggcGaaaacg.....                                                                                  | 5    | 1 | seq |
| .....aggggaUucggcaaaaacg.....                                                                                   | 1    | 1 | seq |
| .....aggggaagucggcaaaaAg.....                                                                                   | 1    | 1 | seq |
| .....aggggaagucggcaaaaacU.....                                                                                  | 6    | 1 | seq |
| .....aggggaUucggcaaaaacg.....                                                                                   | 1    | 1 | seq |
| .....aggggaagCcgcaaaaacg.....                                                                                   | 3    | 1 | seq |
| .....aggggaagucggcaaaaacg.....                                                                                  | 1931 | 0 | seq |
| .....Ngggaagucggcaaaaacg.....                                                                                   | 1    | 1 | seq |
| .....aggggaagucggUaaaacg.....                                                                                   | 3    | 1 | seq |
| .....aggggaagucggcaaaaGcg.....                                                                                  | 3    | 1 | seq |
| .....aggggaagucggcaaaaCcg.....                                                                                  | 2    | 1 | seq |
| .....agggGagucggcaaaaacg.....                                                                                   | 5    | 1 | seq |
| .....Ggggaagucggcaaaaacg.....                                                                                   | 7    | 1 | seq |
| .....aggggaagucggcaGaaacg.....                                                                                  | 1    | 1 | seq |
| .....agUgaagucggcaaaaacg.....                                                                                   | 1    | 1 | seq |
| .....aggUaagucggcaaaaacg.....                                                                                   | 1    | 1 | seq |
| .....aggggaagAcggcaaaaacg.....                                                                                  | 1    | 1 | seq |
| .....aggggaagUaggcaaaaacg.....                                                                                  | 2    | 1 | seq |
| .....Ugggaagucggcaaaaacg.....                                                                                   | 2    | 1 | seq |
| .....aggggaagucggcaCaacg.....                                                                                   | 1    | 1 | seq |
| .....aggggaacCucggcaaaaacg.....                                                                                 | 1    | 1 | seq |
| .....aggggaagucgcCaaaacg.....                                                                                   | 1    | 1 | seq |
| .....aggggaGgucggcaaaaacg.....                                                                                  | 4    | 1 | seq |
| .....aggggaagucggGaaaacga.....                                                                                  | 1    | 1 | seq |
| .....aggggaagucggcaaaaacgU.....                                                                                 | 54   | 1 | seq |
| .....aggggaagucggcCaaaacga.....                                                                                 | 1    | 1 | seq |
| .....aggggaagucggcaaaaacgC.....                                                                                 | 20   | 1 | seq |
| .....aggggaagucggcaaaaacga.....                                                                                 | 273  | 0 | seq |
| .....aggggaagucggcaaaaAg.....                                                                                   | 1    | 1 | seq |
| .....Ggggaagucggcaaaaacga.....                                                                                  | 1    | 1 | seq |
| .....aggggaagucggcaGaaacga.....                                                                                 | 3    | 1 | seq |
| .....aggggaagucggUaaaacga.....                                                                                  | 1    | 1 | seq |
| .....aggggaagucgcAaaaacga.....                                                                                  | 1    | 1 | seq |
| .....aggggaagucggcaaaaacgCa.....                                                                                | 4    | 1 | seq |
| .....aggggaagucggcaaaaacgaa.....                                                                                | 1    | 0 | seq |
| .....aggggaagucggcaaaaacgCau.....                                                                               | 1    | 1 | seq |
| .....aggggaagucggcaaaaacgUauc.....                                                                              | 1    | 1 | seq |
| .....aggggaagucggcaaaaacgaauc.....                                                                              | 2    | 0 | seq |
| .....aggggaagucggcaaaaacgCaucc.....                                                                             | 1    | 1 | seq |
| .....aggggaagucggcaaaaacgUaucg.....                                                                             | 1    | 1 | seq |
| .....aggggaagucggcaaaaacgaaucg.....                                                                             | 1    | 0 | seq |
| .....aggggaagucggcaaaaacgaaucggu.....                                                                           | 1    | 0 | seq |
| .....aggggaagucggcaaaaacgUauccgua.....                                                                          | 3    | 1 | seq |
| .....aggggaagucggcaaaaacgUauccguaacu.....                                                                       | 1    | 1 | seq |
| .....aggggaagucggcaaaaacgGauccguaacuucu.....                                                                    | 1    | 1 | seq |
| .....gUgaagucggcaaaaacg.....                                                                                    | 4    | 1 | seq |
| .....gggaagucggcaaaaacC.....                                                                                    | 19   | 1 | seq |
| .....Cggaagucggcaaaaacg.....                                                                                    | 1    | 1 | seq |
| .....gggaagucggGaaaacg.....                                                                                     | 1    | 1 | seq |
| .....gggaUgucggcaaaaacg.....                                                                                    | 1    | 1 | seq |
| .....gggaagucggcaaaaacg.....                                                                                    | 3555 | 0 | seq |

# Mature Star

|                                                                                                                |     |   |     |
|----------------------------------------------------------------------------------------------------------------|-----|---|-----|
| cacugaaaaauugaauuuguuucaggucuccaagguaaacagucuuuggucaauagaacauuguaagguaagggaaagucggcaaacgaauccguaacuucuaagugcaa |     |   |     |
| .....gggaagGcggcaaaacg.....                                                                                    | 3   | 1 | seq |
| .....gggaagucggcaaUacg.....                                                                                    | 1   | 1 | seq |
| .....gggaaAucggcaaaacg.....                                                                                    | 1   | 1 | seq |
| .....gggaagucggcaUaacg.....                                                                                    | 2   | 1 | seq |
| .....gggaagucggcaaaCcg.....                                                                                    | 3   | 1 | seq |
| .....gggGagucggcaaaacg.....                                                                                    | 17  | 1 | seq |
| .....gggaagucggcaaaGcg.....                                                                                    | 14  | 1 | seq |
| .....gggCagucggcaaaacg.....                                                                                    | 1   | 1 | seq |
| .....gggaagucggcaaGacg.....                                                                                    | 12  | 1 | seq |
| .....gggaagucggcaaaUcg.....                                                                                    | 1   | 1 | seq |
| .....gAgaagucggcaaaacg.....                                                                                    | 4   | 1 | seq |
| .....Aggaagucggcaaaacg.....                                                                                    | 5   | 1 | seq |
| .....gggaagucggcaGaacg.....                                                                                    | 15  | 1 | seq |
| .....Nggaagucggcaaaacg.....                                                                                    | 3   | 1 | seq |
| .....gggUagucggcaaaacg.....                                                                                    | 4   | 1 | seq |
| .....gggaagucggcGaaacg.....                                                                                    | 6   | 1 | seq |
| .....gggaGgucggcaaaacg.....                                                                                    | 9   | 1 | seq |
| .....gggaagucggcaaaAag.....                                                                                    | 2   | 1 | seq |
| .....gggaagucggUaaacg.....                                                                                     | 3   | 1 | seq |
| .....gggaagCcgcaaaacg.....                                                                                     | 13  | 1 | seq |
| .....Uggaagucggcaaaacg.....                                                                                    | 6   | 1 | seq |
| .....gggaagucggcaaaacU.....                                                                                    | 13  | 1 | seq |
| .....gggaagucggAaaacga.....                                                                                    | 1   | 1 | seq |
| .....gggaagucggcaaGacga.....                                                                                   | 2   | 1 | seq |
| .....gggaagucCgcaaaacga.....                                                                                   | 1   | 1 | seq |
| .....gggaagucggcaaaacgC.....                                                                                   | 30  | 1 | seq |
| .....gggaagucggcaaaaUga.....                                                                                   | 1   | 1 | seq |
| .....gggaGgucggcaaaacga.....                                                                                   | 1   | 1 | seq |
| .....gggaagucggcaaaacga.....                                                                                   | 252 | 0 | seq |
| .....gggaagucggcaaaacgU.....                                                                                   | 32  | 1 | seq |
| .....gggaagucggcaaaacgaa.....                                                                                  | 5   | 0 | seq |
| .....gggaagucggcaaaacgCa.....                                                                                  | 2   | 1 | seq |
| .....gggaagucggcaaaacgaG.....                                                                                  | 1   | 1 | seq |
| .....gggaagucggcaaaacgCau.....                                                                                 | 1   | 1 | seq |
| .....gggaagucggcaaaacgaauc.....                                                                                | 1   | 0 | seq |
| .....gggaagucggcaaaacgUaucc.....                                                                               | 1   | 1 | seq |
| .....gggaagucggcaaaacgaaucg.....                                                                               | 1   | 0 | seq |
| .....gggaagucggcaaaacgaaucgguG.....                                                                            | 1   | 1 | seq |
| .....gggaagucggcaaaacgaaucgguaa.....                                                                           | 1   | 0 | seq |
| .....gggaagucggcaaaacgaaucgguacu.....                                                                          | 1   | 0 | seq |
| .....ggUagucggcaaaacga.....                                                                                    | 1   | 1 | seq |
| .....ggaagucggcaaaGcga.....                                                                                    | 1   | 1 | seq |
| .....Agaagucggcaaaacga.....                                                                                    | 1   | 1 | seq |
| .....ggaagucggcaGaacga.....                                                                                    | 1   | 1 | seq |
| .....ggaagucggcaaaacgU.....                                                                                    | 22  | 1 | seq |
| .....ggaagucggAaaacga.....                                                                                     | 1   | 1 | seq |
| .....ggaagCcgcaaaacga.....                                                                                     | 1   | 1 | seq |
| .....ggaagucggcaaaacga.....                                                                                    | 170 | 0 | seq |
| .....ggaagucggcaaaacgC.....                                                                                    | 11  | 1 | seq |
| .....ggaagucggcaaaacgCa.....                                                                                   | 3   | 1 | seq |
| .....ggaagucggcaaaacgUa.....                                                                                   | 2   | 1 | seq |
| .....ggaagucggcaaaacgaa.....                                                                                   | 2   | 0 | seq |
| .....ggaagucggcaaaacgCau.....                                                                                  | 2   | 1 | seq |
| .....ggaagucggcaaaacgaauc.....                                                                                 | 1   | 0 | seq |
| .....ggaagucggcaaaGcgaau.....                                                                                  | 1   | 1 | seq |
| .....ggaagucggcaaaacgUau.....                                                                                  | 1   | 1 | seq |
| .....ggaagucggcaaaacgaaucC.....                                                                                | 2   | 1 | seq |
| .....ggaagucggcaaaacgaaucg.....                                                                                | 1   | 0 | seq |
| .....ggaagucggcaaaacgUauccguacu.....                                                                           | 2   | 1 | seq |
| .....ggaagucggcaaaacgGauccguacuuc.....                                                                         | 2   | 1 | seq |
| .....gaagucggcaaaacgaa.....                                                                                    | 1   | 0 | seq |
| .....gaGgucggcaaaacgaa.....                                                                                    | 1   | 1 | seq |
| .....gaagucggcaaaacgUa.....                                                                                    | 3   | 1 | seq |
| .....gaagucggcaaaacgCa.....                                                                                    | 5   | 1 | seq |
| .....gaagucggcaaaacgCau.....                                                                                   | 1   | 1 | seq |
| .....gaagucggcaaaacgaa.....                                                                                    | 1   | 0 | seq |
| .....gaagucggcaaaacgaauc.....                                                                                  | 1   | 0 | seq |
| .....gaagucggcaaaacgaaucCA.....                                                                                | 2   | 1 | seq |
| .....gaagucggcaaaacgUauccg.....                                                                                | 1   | 1 | seq |
| .....gaagucggcaaaacgaaucg.....                                                                                 | 2   | 0 | seq |

# Mature Star

|                                                                                                                 |     |   |     |
|-----------------------------------------------------------------------------------------------------------------|-----|---|-----|
| cacugaaaaauugaauuuguuucaggucuccaagguaaaacagucuuugggucaauagaacauuguaagguaagggaagucggcaaacgaauccguaacuucuaugugcaa |     |   |     |
| .....gaagucggcaaaacgUauccgu.....                                                                                | 3   | 1 | seq |
| .....gaagucggcaaaacgaauccgu.....                                                                                | 2   | 0 | seq |
| .....gaagucggcaaaacgaauccgua.....                                                                               | 3   | 0 | seq |
| .....gaagucggcaaaacgUauccgua.....                                                                               | 3   | 1 | seq |
| .....gaagucggcaaaacgaauccguaac.....                                                                             | 2   | 0 | seq |
| .....gaagucggcaaaacgaauccguaacu.....                                                                            | 1   | 0 | seq |
| .....aagucggcaaaacgCaucc.....                                                                                   | 1   | 1 | seq |
| .....aagucggcaaaacgUaucc.....                                                                                   | 1   | 1 | seq |
| .....aagucggcaaaacgUauccg.....                                                                                  | 1   | 1 | seq |
| .....aagucggcaaaacgUauccgu.....                                                                                 | 1   | 1 | seq |
| .....aagucggcaaaacgaauccgua.....                                                                                | 1   | 0 | seq |
| .....aagucggcaaaacgaauccguaacu.....                                                                             | 1   | 0 | seq |
| .....aagucggcaaaacgGauccguaacuuc.....                                                                           | 1   | 1 | seq |
| .....agucggcaaaacgaauccU.....                                                                                   | 1   | 1 | seq |
| .....agucggcaaaacgaauccg.....                                                                                   | 1   | 0 | seq |
| .....agucggcaaaacgaauccgua.....                                                                                 | 1   | 0 | seq |
| .....ucggcaaaacgaauccgu.....                                                                                    | 3   | 0 | seq |
| .....ucggcaaaacgaauccgua.....                                                                                   | 2   | 0 | seq |
| .....ucggcaaaacgCauccguaacu.....                                                                                | 1   | 1 | seq |
| .....ucggcaaaacgCauccguaacuuc.....                                                                              | 1   | 1 | seq |
| .....ucggcaaaacgaauccguaacuuc.....                                                                              | 1   | 0 | seq |
| .....ucggcaaaacgGauccguaacuuc.....                                                                              | 7   | 1 | seq |
| .....cggcaaaacgaauccguaacu.....                                                                                 | 1   | 0 | seq |
| .....cggcaaaacgaauccguaacuucG.....                                                                              | 1   | 1 | seq |
| .....cggcaaaacgGauccguaacuuc.....                                                                               | 4   | 1 | seq |
| .....ggcaaaacgUauccgua.....                                                                                     | 1   | 1 | seq |
| .....ggcaaaacgaauccguaacu.....                                                                                  | 1   | 0 | seq |
| .....ggcaaaacgUauccguaacuuc.....                                                                                | 1   | 1 | seq |
| .....ggcaaaacgGauccguaacuuc.....                                                                                | 1   | 1 | seq |
| .....gcaaaacgaauccguaacu.....                                                                                   | 3   | 0 | seq |
| .....gcaaaacgaauccguaacuucG.....                                                                                | 1   | 1 | seq |
| .....gcaaaacgGauccguaacuuc.....                                                                                 | 17  | 1 | seq |
| .....caaaacgNauccguaacu.....                                                                                    | 1   | 1 | seq |
| .....caaaacgaauccguaacu.....                                                                                    | 1   | 0 | seq |
| .....caaaacgUauccguaacuuc.....                                                                                  | 1   | 1 | seq |
| .....caaaacgaauccguaacuucG.....                                                                                 | 1   | 1 | seq |
| .....caaaacgGauccguaacuuc.....                                                                                  | 51  | 1 | seq |
| .....aaaacgaauccguaacu.....                                                                                     | 2   | 0 | seq |
| .....aaaacgUauccguaacu.....                                                                                     | 2   | 1 | seq |
| .....aaaacgGauccguaacuuc.....                                                                                   | 13  | 1 | seq |
| .....aaacgUauccguaacu.....                                                                                      | 1   | 1 | seq |
| .....aaacgaauccguaacuuc.....                                                                                    | 3   | 0 | seq |
| .....aaacgGauccguaacuuc.....                                                                                    | 71  | 1 | seq |
| .....aaacgaauccguaacuucG.....                                                                                   | 8   | 1 | seq |
| .....aaacgaauccguaacuucA.....                                                                                   | 1   | 1 | seq |
| .....aaacgGauccguaacuucua.....                                                                                  | 1   | 1 | seq |
| .....aacgaauccguaacuuc.....                                                                                     | 4   | 0 | seq |
| .....aacgaauccguaacuucC.....                                                                                    | 1   | 1 | seq |
| .....aacgGauccguaacuuc.....                                                                                     | 123 | 1 | seq |
| .....aacgaauccguaacuucG.....                                                                                    | 5   | 1 | seq |
| .....acgGauccguaacuuc.....                                                                                      | 254 | 1 | seq |
| .....acgaauccguaacuucG.....                                                                                     | 14  | 1 | seq |
| .....acgaauccguaacuucGa.....                                                                                    | 2   | 1 | seq |
| .....acgGauccguaacuucag.....                                                                                    | 1   | 1 | seq |
| .....cgaauccguaacuucGa.....                                                                                     | 2   | 1 | seq |

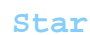[illegible]

## Mature

## Star

|                       |                            |                                  |                       |                 |      |   |     |
|-----------------------|----------------------------|----------------------------------|-----------------------|-----------------|------|---|-----|
| uuuuuccuacacuguuuaaua | ccuggggcucagacaccu         | aacucuucccccucgucuccagagauuuagcu | aaauuuggggagccugggguu | uagagaauucugagg |      |   |     |
| .....                 | .accuggggcucagacGcc.....   |                                  |                       |                 | 17   | 1 | seq |
| .....                 | .accuUgggcucagacacc.....   |                                  |                       |                 | 1    | 1 | seq |
| .....                 | .aGcuggggcucagacacc.....   |                                  |                       |                 | 1    | 1 | seq |
| .....                 | .accugAgcucagacacc.....    |                                  |                       |                 | 3    | 1 | seq |
| .....                 | .accuggggcucagUcacc.....   |                                  |                       |                 | 1    | 1 | seq |
| .....                 | .accuggggcucagacaccu.....  |                                  |                       |                 | 14   | 0 | seq |
| .....                 | .accuggggcucagacaccA.....  |                                  |                       |                 | 1346 | 1 | seq |
| .....                 | .accuggggcucagaGaccu.....  |                                  |                       |                 | 1    | 1 | seq |
| .....                 | .accuggggcucagacaccC.....  |                                  |                       |                 | 16   | 1 | seq |
| .....                 | .accuggggcucagacaccG.....  |                                  |                       |                 | 72   | 1 | seq |
| .....                 | .accuggggcucagacaccAa..... |                                  |                       |                 | 1    | 1 | seq |
| .....                 | .ccuggggcucagGcaccu.....   |                                  |                       |                 | 1    | 1 | seq |
| .....                 | .ccuggggcucagacaccC.....   |                                  |                       |                 | 91   | 1 | seq |
| .....                 | .ccuggggcucagacaccA.....   |                                  |                       |                 | 9803 | 1 | seq |
| .....                 | .ccuggggcuUagacaccu.....   |                                  |                       |                 | 4    | 1 | seq |
| .....                 | .Gcuggggcucagacaccu.....   |                                  |                       |                 | 1    | 1 | seq |
| .....                 | .ccuggggcucagaUaccu.....   |                                  |                       |                 | 1    | 1 | seq |
| .....                 | .ccuggggcucagacaccu.....   |                                  |                       |                 | 154  | 0 | seq |
| .....                 | .ccuggggcucagacaccG.....   |                                  |                       |                 | 463  | 1 | seq |
| .....                 | .ccuggggcucagacGccu.....   |                                  |                       |                 | 1    | 1 | seq |
| .....                 | .ccuggggcCagacaccu.....    |                                  |                       |                 | 1    | 1 | seq |
| .....                 | .ccuggggcucagacaccAa.....  |                                  |                       |                 | 3    | 1 | seq |
| .....                 | .cuggggcucagacaccAa.....   |                                  |                       |                 | 1    | 1 | seq |
| .....                 | .....cuggguuaAagaaucu..... |                                  |                       |                 | 1    | 1 | seq |





## Star

## Mature

aaggaguguaaaucagaguguuguugaacacuuugagggaaggaggcucugcaaggaugcauugagcaggccaaggaguguguaacaacucaacuuugaguucuguuag

|                                |     |   |     |
|--------------------------------|-----|---|-----|
| .....aaggaguguguaacaacG.....   | 13  | 1 | seq |
| .....aaggaguguguaUcaacu.....   | 1   | 1 | seq |
| .....aaggaguguguaacaAa.....    | 1   | 1 | seq |
| .....aaggaguguguaacaacu.....   | 3   | 1 | seq |
| .....aaggaguguguaGcaacu.....   | 3   | 1 | seq |
| .....aaggagCguguaacaacu.....   | 4   | 1 | seq |
| .....aagAaguguguaacaacu.....   | 3   | 1 | seq |
| .....aaggaguguguaacaGcu.....   | 1   | 1 | seq |
| .....aaggaguguguaacaacu.....   | 821 | 0 | seq |
| .....aaggagAguguaacaacu.....   | 1   | 1 | seq |
| .....Uaggaguguguaacaacu.....   | 3   | 1 | seq |
| .....aaggaguguguaacGacu.....   | 2   | 1 | seq |
| .....aaggaguguguaacaacu.....   | 1   | 1 | seq |
| .....aaggaguguguaaUaacu.....   | 1   | 1 | seq |
| .....aCggaguguguaacaacu.....   | 1   | 1 | seq |
| .....aaggagugAguaacaacu.....   | 1   | 1 | seq |
| .....aaggaguguguaacaacCc.....  | 1   | 1 | seq |
| .....aaggaguguguaacaGuc.....   | 1   | 1 | seq |
| .....Gaggaguguguaacaacuc.....  | 1   | 1 | seq |
| .....aaggaguguguaacaacuc.....  | 53  | 0 | seq |
| .....aaggaguguguaacaacuca..... | 1   | 1 | seq |
| .....aGggaguguguaacaacuca..... | 1   | 1 | seq |
| .....aaggaguguguaGcaacuca..... | 2   | 1 | seq |
| .....aaggagugAguaacaacuca..... | 1   | 1 | seq |
| .....aaggaguguguaacCacuca..... | 1   | 1 | seq |
| .....aagAaguguguaacaacuca..... | 1   | 1 | seq |
| .....aaggaguguguaacaacuca..... | 189 | 0 | seq |
| .....aaggaguguguaacaacuGa..... | 1   | 1 | seq |
| .....aaUgaguguguaacaacuca..... | 1   | 1 | seq |
| .....aaggagCguguaacaacuca..... | 2   | 1 | seq |
| .....aaggagugGguaacaacuca..... | 1   | 1 | seq |
| .....aaggaguguguaacaacucC..... | 1   | 1 | seq |
| .....aggaguguguaacGacu.....    | 5   | 1 | seq |
| .....aggGguguguaacaacu.....    | 1   | 1 | seq |
| .....Gggaguguguaacaacu.....    | 1   | 1 | seq |
| .....aggaguguguaacaacG.....    | 9   | 1 | seq |
| .....aggaguguguaUcaacu.....    | 1   | 1 | seq |
| .....aggUguguguaacaacu.....    | 1   | 1 | seq |
| .....aggagAguguaacaacu.....    | 2   | 1 | seq |
| .....aggaguguguaacaacu.....    | 328 | 0 | seq |
| .....aggagugugCaacaacu.....    | 2   | 1 | seq |
| .....agUaguguguaacaacu.....    | 1   | 1 | seq |
| .....aggaguguguCacaacuc.....   | 1   | 1 | seq |
| .....aggaguguguaacaacuc.....   | 173 | 0 | seq |
| .....aggaguguguaacaacGc.....   | 1   | 1 | seq |
| .....aggaguguguaacaacCc.....   | 1   | 1 | seq |
| .....Nggaguguguaacaacuc.....   | 1   | 1 | seq |
| .....aggaguguguaacaacuc.....   | 1   | 1 | seq |
| .....aggaguguguaaUaacuca.....  | 1   | 1 | seq |
| .....aggaguguguaacGacuca.....  | 1   | 1 | seq |
| .....Nggaguguguaacaacuca.....  | 2   | 1 | seq |
| .....aggagugugCaacaacuca.....  | 3   | 1 | seq |
| .....aggagCguguaacaacuca.....  | 1   | 1 | seq |
| .....aggAaguguaacaacuca.....   | 1   | 1 | seq |
| .....aggaguguguaacaaGuca.....  | 1   | 1 | seq |
| .....aggaguguguaGcaacuca.....  | 1   | 1 | seq |
| .....Gggaguguguaacaacuca.....  | 1   | 1 | seq |
| .....aggaguguguaacaaUuca.....  | 1   | 1 | seq |
| .....aggaguguguaacaacucU.....  | 4   | 1 | seq |
| .....aggaguguguaUcaacuca.....  | 1   | 1 | seq |
| .....aggaguguguaacaUcuca.....  | 1   | 1 | seq |
| .....aggaguguguaacaacCca.....  | 2   | 1 | seq |
| .....aggagugugGacaacuca.....   | 4   | 1 | seq |
| .....aggagugugUacaacuca.....   | 1   | 1 | seq |
| .....aggaguguguaacaacuca.....  | 753 | 0 | seq |
| .....aggGguguguaacaacuca.....  | 1   | 1 | seq |
| .....aggaguguguaacaacucaG..... | 1   | 1 | seq |
| .....aggaguguguaacaacucaa..... | 1   | 0 | seq |
| .....ggaguguguaacaacuc.....    | 5   | 0 | seq |
| .....ggaguguguaacaacCca.....   | 1   | 1 | seq |

Star

Mature

|                                                                                                                   |    |   |     |
|-------------------------------------------------------------------------------------------------------------------|----|---|-----|
| aaggaguguaaaucagaguguuguugaacacuuugagggaaggaggcucugcaaggaaugcauugagcaggcacaaggaguguguaaacaacuacaacuuugaguucuguuag |    |   |     |
| .....ggaguguguaaacaacuca.....                                                                                     | 13 | 0 | seq |
| .....ggaguguguaGcaacuca.....                                                                                      | 2  | 1 | seq |
| .....ggaguguguaaacaacucaac.....                                                                                   | 1  | 0 | seq |
| .....gaguguguaaacaacuca.....                                                                                      | 7  | 0 | seq |

Provisional ID : MA\_280158\_29425  
 Score total : 6078.4  
 Score for star read(s) : 3.9  
 Score for read counts : 6078.3  
 Score for mfe : -1.5  
 Score for randfold : -2.2  
 Score for cons. seed :  
 Total read count : 11934  
 Mature read count : 11932  
 Loop read count : 1  
 Star read count : 1

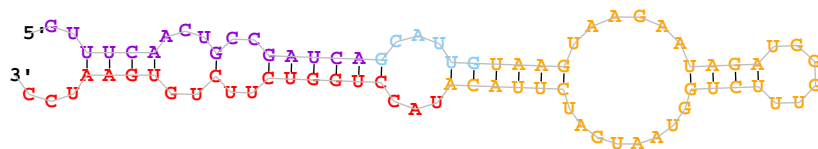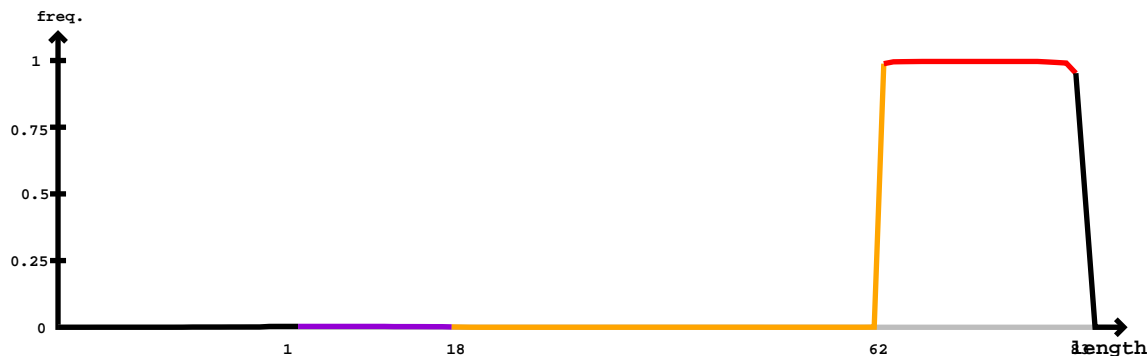

## Star

## Mature

| 5' -                                                                                                               | obs | exp | reads | mm | sample |
|--------------------------------------------------------------------------------------------------------------------|-----|-----|-------|----|--------|
| uguuuucaugaacucaaucuuggguuucaacugccgaucagcauuguaaguaagaauagauuggguuuucugguuaaugaucuuacauaccugggucuuucugugaauccugaa | -3' |     |       |    |        |
| uguuuucaugaacucaaucuuggguuucaacugccgaucagcauuguaaguaagaauagauuggguuuucugguuaaugaucuuacauaccugggucuuucugugaauccugaa |     |     |       |    |        |
| .(((.....))).....(((((.....(((((.....(((((.....(((((.....)))))).....)))))).....)))))).....)))).....)).....)        |     |     |       |    |        |
| .uuuuucaugaacucaaucuugg.....                                                                                       |     |     | 1     | 0  | seq    |
| .acucaaucuuggCuuucaacug.....                                                                                       |     |     | 1     | 1  | seq    |
| .cucaaGcuuggguuucaacug.....                                                                                        |     |     | 1     | 1  | seq    |
| .cucaaucuuggCuuucaacug.....                                                                                        |     |     | 7     | 1  | seq    |
| .aucuuggguuucaacugccga.....                                                                                        |     |     | 2     | 0  | seq    |
| .cuuggguuucaacugccg.....                                                                                           |     |     | 1     | 0  | seq    |
| .uggguuucaacugccgau.....                                                                                           |     |     | 1     | 0  | seq    |
| .uggguuucaacugccgaGc.....                                                                                          |     |     | 1     | 1  | seq    |
| .uggguuucaacugccgauc.....                                                                                          |     |     | 8     | 0  | seq    |
| .uggguuucaacugccgaucA.....                                                                                         |     |     | 14    | 1  | seq    |
| .uggguuucaacugccgaucAc.....                                                                                        |     |     | 1     | 1  | seq    |
| .ggguuucaacugccgauc.....                                                                                           |     |     | 2     | 0  | seq    |
| .guuucaacugccgauc.....                                                                                             |     |     | 1     | 0  | seq    |
| .auagaugggGuucuggu.....                                                                                            |     |     | 1     | 1  | seq    |
| .Aauaccugggucuuucugugaaucc.....                                                                                    |     |     | 1     | 1  | seq    |
| .Cuaccugggucuuucugugaaucc.....                                                                                     |     |     | 2     | 1  | seq    |
| .Nuaccugggucuuucugugaaucc.....                                                                                     |     |     | 1     | 1  | seq    |
| .auaccugggucuuucugugaaucc.....                                                                                     |     |     | 2     | 0  | seq    |
| .uaccugggucuuucuguga.....                                                                                          |     |     | 21    | 0  | seq    |
| .uaccuAgucuuucuguga.....                                                                                           |     |     | 1     | 1  | seq    |
| .uaccugggucuuucuguga.....                                                                                          |     |     | 21    | 0  | seq    |
| .uaccugggucuuucugugaG.....                                                                                         |     |     | 1     | 1  | seq    |
| .uaccugggucuuucugugaC.....                                                                                         |     |     | 3     | 1  | seq    |
| .uaccugggucuuucugugaau.....                                                                                        |     |     | 20    | 0  | seq    |
| .uaccugggucuuucugGgaau.....                                                                                        |     |     | 1     | 1  | seq    |
| .uaccugggCcuucugugaau.....                                                                                         |     |     | 1     | 1  | seq    |
| .uaccugggCcuucugugaaucc.....                                                                                       |     |     | 1     | 1  | seq    |
| .Aaccugggucuuucugugaaucc.....                                                                                      |     |     | 1     | 1  | seq    |
| .uaccugggucCucugugaaucc.....                                                                                       |     |     | 1     | 1  | seq    |
| .uaccCgggucuuucugugaaucc.....                                                                                      |     |     | 1     | 1  | seq    |
| .uaccugUucuuucugugaaucc.....                                                                                       |     |     | 1     | 1  | seq    |
| .uaccuAgucuuucugugaaucc.....                                                                                       |     |     | 1     | 1  | seq    |
| .uaccugggucuuuAugaaucc.....                                                                                        |     |     | 2     | 1  | seq    |

## Star

## Mature

uguuuucaugaacuaacuugggguuucaacugccgaucagcauuguaaguaagaaugaugggguuucugguaaugaucuacauaccugguucuuugugaauccugaa

|                                      |      |   |     |
|--------------------------------------|------|---|-----|
| .....uaccugguucuuucugugaauA.....     | 4    | 1 | seq |
| .....uaccugguucuuucugugGauc.....     | 3    | 1 | seq |
| .....uGccugguucuuucugugaauC.....     | 1    | 1 | seq |
| .....uaccugguucuuucugugaaCc.....     | 3    | 1 | seq |
| .....uaccugguucuuucugugaauU.....     | 12   | 1 | seq |
| .....uaccugguucuuucugugaaGc.....     | 2    | 1 | seq |
| .....uaccugguucuuucugugaauC.....     | 405  | 0 | seq |
| .....uaccugguucuuucugugaaAc.....     | 1    | 1 | seq |
| .....uaccugguucuuCgugaauC.....       | 1    | 1 | seq |
| .....uaccugguucuuCgugaaucc.....      | 4    | 1 | seq |
| .....uaccugguucuuucugugGaucc.....    | 26   | 1 | seq |
| .....uaccugAucuuucugugaaucc.....     | 3    | 1 | seq |
| .....uacUugguucuuucugugaaucc.....    | 8    | 1 | seq |
| .....uaccGggucuuucugugaaucc.....     | 1    | 1 | seq |
| .....uaUcugguucuuucugugaaucc.....    | 9    | 1 | seq |
| .....uaccugguucuuucugugUaucc.....    | 5    | 1 | seq |
| .....uaccuggCeuucugugaaucc.....      | 23   | 1 | seq |
| .....uaccugguucuuucugugaauUc.....    | 10   | 1 | seq |
| .....uaccugguucuuCgugaaucc.....      | 15   | 1 | seq |
| .....uaccugguucuuCuugaaucc.....      | 2    | 1 | seq |
| .....uaccugguucuuucugugaUucc.....    | 2    | 1 | seq |
| .....uaccAgguucuuucugugaaucc.....    | 8    | 1 | seq |
| .....uaccuCguucuuucugugaaucc.....    | 2    | 1 | seq |
| .....uaccugguucuuucugugaauU.....     | 1289 | 1 | seq |
| .....uaccugguucuuucugugaCucc.....    | 1    | 1 | seq |
| .....uaccuggGeuucugugaaucc.....      | 4    | 1 | seq |
| .....uaccugguGuucugugaaucc.....      | 5    | 1 | seq |
| .....uGccugguucuuucugugaaucc.....    | 14   | 1 | seq |
| .....uaccugguUuuucugugaaucc.....     | 2    | 1 | seq |
| .....uaccugguucuuucuguUaauc.....     | 2    | 1 | seq |
| .....uaccugguucuuucugugaauG.....     | 24   | 1 | seq |
| .....uaGeugguucuuucugugaaucc.....    | 1    | 1 | seq |
| .....uaccugguuuuAugugaaucc.....      | 2    | 1 | seq |
| .....uaccugguuuUugugaaucc.....       | 4    | 1 | seq |
| .....uaccugguuuAcugugaaucc.....      | 3    | 1 | seq |
| .....uaccugguucuuucugCgaaucc.....    | 29   | 1 | seq |
| .....uaccugguuCucugugaaucc.....      | 24   | 1 | seq |
| .....uaccugguuuCcuugugaaucc.....     | 19   | 1 | seq |
| .....Naccugguucuuucugugaaucc.....    | 14   | 1 | seq |
| .....uaccugguucuuucugAgaaucc.....    | 6    | 1 | seq |
| .....uaccugguuuGcuugugaaucc.....     | 5    | 1 | seq |
| .....uaccugguucuuucugaaGcc.....      | 8    | 1 | seq |
| .....uaccugguucuuucugugaauCA.....    | 414  | 1 | seq |
| .....Gaccugguucuuucugugaaucc.....    | 22   | 1 | seq |
| .....uaccugguuuGugugaaucc.....       | 1    | 1 | seq |
| .....uaccugguAuuucugugaaucc.....     | 1    | 1 | seq |
| .....uaccugguuuuAugaaucc.....        | 3    | 1 | seq |
| .....uaccugguucuuucugugaAAcc.....    | 2    | 1 | seq |
| .....uaccuggAAcuucugugaaucc.....     | 5    | 1 | seq |
| .....uaccugguuCguucugugaaucc.....    | 1    | 1 | seq |
| .....uaccugguucuuucugGgaaucc.....    | 5    | 1 | seq |
| .....uaccuAguucuuucugugaaucc.....    | 7    | 1 | seq |
| .....uaccugguucuuucugugaaucc.....    | 9189 | 0 | seq |
| .....uaAcugguucuuucugugaaucc.....    | 2    | 1 | seq |
| .....uaccugguucuuucugugCaucc.....    | 1    | 1 | seq |
| .....uaccugguucuuucugugaaCcc.....    | 20   | 1 | seq |
| .....Caccugguucuuucugugaaucc.....    | 26   | 1 | seq |
| .....Aaccugguucuuucugugaaucc.....    | 4    | 1 | seq |
| .....uacAugguucuuucugugaaucc.....    | 1    | 1 | seq |
| .....uaccugguucuuucuguAAaucc.....    | 2    | 1 | seq |
| .....uaccugguucuuucuguCAaucc.....    | 1    | 1 | seq |
| .....uaccCGguucuuucugugaaucc.....    | 30   | 1 | seq |
| .....uaccugguucuuucugugaauccu.....   | 1    | 0 | seq |
| .....uaccugguucuuucugugaauccAA.....  | 3    | 1 | seq |
| .....uaccugguucuuucugugaauccC.....   | 1    | 1 | seq |
| .....uaccugguucuuucugugaauccuUa..... | 1    | 1 | seq |
| .....accugguucuuucugugaa.....        | 2    | 0 | seq |
| .....accugguucuuucugugaaC.....       | 1    | 1 | seq |
| .....Gccugguucuuucugugaaucc.....     | 1    | 1 | seq |
| .....accugguucuuucugugaaucc.....     | 4    | 0 | seq |

## Star

## Mature

|                                                                                                                             |    |   |     |
|-----------------------------------------------------------------------------------------------------------------------------|----|---|-----|
| uguuuucaugaacucaaucuugggguuucaacugccgaucagcauuguaaguaagaaauagauaggguuucugguuaaugaucuuaca <u>u</u> accuggucuuucugugaauccugaa |    |   |     |
| .....aUcuggucuuucugugaaucc....                                                                                              | 1  | 1 | seq |
| .....accuggucuuucugugaaucc....                                                                                              | 19 | 0 | seq |
| .....accuggucuuucugugaaucaA....                                                                                             | 2  | 1 | seq |
| .....accuggucuuucugugaauccA...                                                                                              | 47 | 1 | seq |
| .....accuggucuuucugugaauccu...                                                                                              | 1  | 0 | seq |
| .....accuggucuuucugugaauccC...                                                                                              | 2  | 1 | seq |
| .....accuggucuuucugugaauccG...                                                                                              | 3  | 1 | seq |
| .....ccuggucuuucugugaaucc....                                                                                               | 1  | 1 | seq |
| .....ccuggucuuucugugaaucc....                                                                                               | 2  | 0 | seq |
| .....ccAggucuuucugugaaucc....                                                                                               | 1  | 1 | seq |
| .....ccuggucuuucugugaaucc....                                                                                               | 4  | 0 | seq |
| .....cuggucuuucugugaaucc....                                                                                                | 2  | 0 | seq |
| .....cuggucuuucugugaaucc....                                                                                                | 2  | 0 | seq |
| .....uggucuuucugugaaucc....                                                                                                 | 4  | 0 | seq |
| .....uggucuuucugugaaucaA....                                                                                                | 1  | 1 | seq |



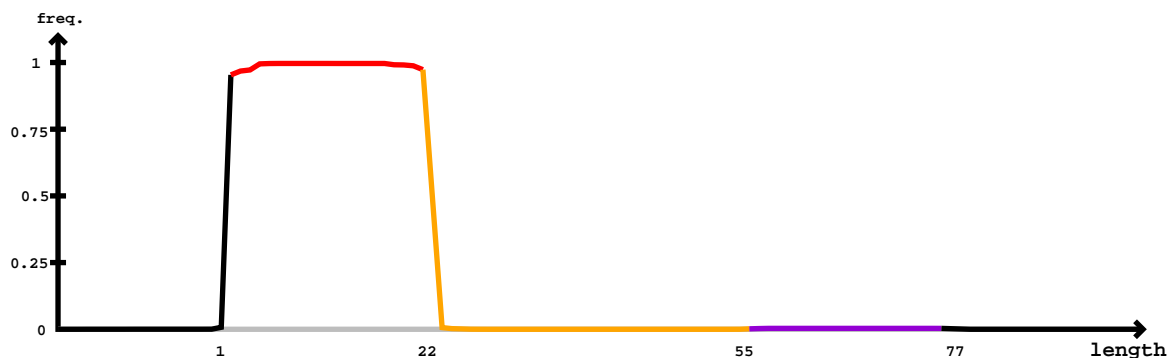

Star

|                                                                                                   | -3'   | obs |        |
|---------------------------------------------------------------------------------------------------|-------|-----|--------|
|                                                                                                   |       | exp |        |
| ggguuuuuuuucaagaaaaccuaaacugcucuaaaacauugcaugucaagaauugcaguguuugagcagcuuuuuguuuucuggaaaaacaaauuuc |       |     |        |
| gguuuuuuuucaagaaaaccuaaacugcucuaaaacauugcaugucaagaauugcaguguuugagcagcuuuuuguuuucuggaaaaacaaauuuc  |       |     |        |
| ..(((((((.....((((((((((((((((((((((((((((((.....).))))))))).....)))))))).)))))).....             | reads | mm  | sample |
| .Uuuuuuuucaagaaacc.....                                                                           | 1     | 1   | seq    |
| ...uuuuuuucaagaaaccuaaacu.....                                                                    | 1     | 0   | seq    |
| ...uuuuccaagaaaccuaaacugc.....                                                                    | 1     | 0   | seq    |
| .....aagaaaccuaaacugcucaaa.....                                                                   | 1     | 0   | seq    |
| .....aaaccuaaacugcucuaaacacug.....                                                                | 1     | 0   | seq    |
| .....aaccuaaacugcucuaaac.....                                                                     | 3     | 0   | seq    |
| .....aaccuaaacugcucuaaacac.....                                                                   | 3     | 0   | seq    |
| .....Caccuaaacugcucuaaacacu.....                                                                  | 2     | 1   | seq    |
| .....aacUuaaacugcucuaaacacu.....                                                                  | 1     | 1   | seq    |
| .....aaccuaaacugcucuaaacacu.....                                                                  | 117   | 0   | seq    |
| .....aaccuaaacugcucuaaacacG.....                                                                  | 4     | 1   | seq    |
| .....aaccuaaacugcucuaaacGcu.....                                                                  | 1     | 1   | seq    |
| .....aaccuaaacugcucuaaacacA.....                                                                  | 3     | 1   | seq    |
| .....aaccuaaacugcucuaaGcacu.....                                                                  | 1     | 1   | seq    |
| .....Caccuaaacugcucuaaacacug.....                                                                 | 5     | 1   | seq    |
| .....aaccuaaacugcucuaaacacug.....                                                                 | 3     | 0   | seq    |
| .....accuaaacugcucCaac.....                                                                       | 1     | 1   | seq    |
| .....accuaaacugcucuaaac.....                                                                      | 92    | 0   | seq    |
| .....accuaaacugcucuaaaca.....                                                                     | 11    | 0   | seq    |
| .....accuaaacuAcucuaaaca.....                                                                     | 1     | 1   | seq    |
| .....accuaaacugcucuaaacU.....                                                                     | 2     | 1   | seq    |
| .....accuaaacugcucuaaacaU.....                                                                    | 3     | 1   | seq    |
| .....accuaaacugcucuaaacac.....                                                                    | 56    | 0   | seq    |
| .....accuaaacugcucuaaacacA.....                                                                   | 2     | 1   | seq    |
| .....Nccuaaacugcucuaaacacu.....                                                                   | 1     | 1   | seq    |
| .....accuaaacugcucGaacacu.....                                                                    | 1     | 1   | seq    |
| .....accuaaaaAugcucuaaacacu.....                                                                  | 1     | 1   | seq    |
| .....accuaaacugcucuaaacacG.....                                                                   | 6     | 1   | seq    |
| .....accuaaacugcCcuaaacacu.....                                                                   | 1     | 1   | seq    |
| .....accuaaacugcucuaaacacu.....                                                                   | 99    | 0   | seq    |
| .....accuaaacuUcuaaacacug.....                                                                    | 2     | 1   | seq    |
| .....accuaaCugcucuaaacacug.....                                                                   | 2     | 1   | seq    |
| .....accuaaacugcCcuaaacacug.....                                                                  | 53    | 1   | seq    |



## Mature

## Star

gguuuuuuucaaagaaaccuaaaacugcucuaaaacacugcagucucugcuaaaacauugcagucuaagauugcaguguuugagcaguuuaugguuuucuggaaaaacaaauuc

|                                     |       |   |     |
|-------------------------------------|-------|---|-----|
| .....accuCaacugcucuaaaacacug.....   | 1     | 1 | seq |
| .....accuaaaacugcucuaaaacCcug.....  | 5     | 1 | seq |
| .....accuaaaacugcucuaaaacUug.....   | 67    | 1 | seq |
| .....accuaaaacugcucuaaaacAg.....    | 79    | 1 | seq |
| .....accGaaacugcucuaaaacacug.....   | 5     | 1 | seq |
| .....accuUaacugcucuaaaacacug.....   | 2     | 1 | seq |
| .....accuaaaacugcucuaaaacacuA.....  | 831   | 1 | seq |
| .....accuaaaacugcucuaaaCcacug.....  | 4     | 1 | seq |
| .....accuaaaacugcucuaaaacacug.....  | 16538 | 0 | seq |
| .....accuaaaacugcucuaaaacGg.....    | 65    | 1 | seq |
| .....accuaaaacuAcuaaaacacug.....    | 20    | 1 | seq |
| .....accuaaaacGgcuaaaacacug.....    | 18    | 1 | seq |
| .....accuaGacugcucuaaaacacug.....   | 33    | 1 | seq |
| .....Cccuaaaacugcucuaaaacacug.....  | 5     | 1 | seq |
| .....accuaaaGugcucuaaaacacug.....   | 1     | 1 | seq |
| .....accuaaaUcugcucuaaaacacug.....  | 1     | 1 | seq |
| .....accuaaaGcugcucuaaaacacug.....  | 10    | 1 | seq |
| .....accuaaaacugUcuaaaacacug.....   | 9     | 1 | seq |
| .....accuaaaacugcucuaaaacCg.....    | 161   | 1 | seq |
| .....accuaaaacugcucuaUaacacug.....  | 3     | 1 | seq |
| .....aUcuaaaacugcucuaaaacacug.....  | 16    | 1 | seq |
| .....accuaaaacugcucCaacacug.....    | 2     | 1 | seq |
| .....Nccuaaaacugcucuaaaacacug.....  | 23    | 1 | seq |
| .....accuaaaacugcucuaaaacGug.....   | 1     | 1 | seq |
| .....accuaaaacugcucuaaaUcacug.....  | 2     | 1 | seq |
| .....accuaaaacugAucaaaacacug.....   | 5     | 1 | seq |
| .....Uccuaaaacugcucuaaaacacug.....  | 20    | 1 | seq |
| .....accuaaaacugcucuaaaacacuC.....  | 56    | 1 | seq |
| .....accuaaaacugcucGaacacug.....    | 49    | 1 | seq |
| .....accuaaaacAgcuaaaacacug.....    | 10    | 1 | seq |
| .....accuaaaacugcucuaaaacUcug.....  | 5     | 1 | seq |
| .....accuaaaacugcucuaaaacacuU.....  | 141   | 1 | seq |
| .....accuaaaacugcucuaGaacacug.....  | 50    | 1 | seq |
| .....accuaaaaAugcucuaaaacacug.....  | 1     | 1 | seq |
| .....accAaaacugcucuaaaacacug.....   | 9     | 1 | seq |
| .....accuaaaacuCcucaaaacacug.....   | 1     | 1 | seq |
| .....accuaaaacugcucuaaaacGcug.....  | 30    | 1 | seq |
| .....accuaCacugcucuaaaacacug.....   | 1     | 1 | seq |
| .....accuaaaacugcucuaCacacug.....   | 1     | 1 | seq |
| .....acUuaaaacugcucuaaaacacug.....  | 15    | 1 | seq |
| .....accuaUacugcucuaaaacacug.....   | 4     | 1 | seq |
| .....accuaaaacugGucaaaacacug.....   | 6     | 1 | seq |
| .....acGuaaacugcucuaaaacacug.....   | 11    | 1 | seq |
| .....accuaaaacugcuGaaacacug.....    | 1     | 1 | seq |
| .....accuaaaacugcGcaaacacug.....    | 1     | 1 | seq |
| .....accuaaaacugcAcaaacacug.....    | 6     | 1 | seq |
| .....accuaaaacugcuUaaacacug.....    | 12    | 1 | seq |
| .....accCaaacugcucuaaaacacug.....   | 33    | 1 | seq |
| .....aAcuaaaacugcucuaaaacacug.....  | 1     | 1 | seq |
| .....accuGaacugcucuaaaacacug.....   | 12    | 1 | seq |
| .....accuaaaacugcucuaGcacug.....    | 31    | 1 | seq |
| .....accuaaaacugcucUaacacug.....    | 3     | 1 | seq |
| .....accuaaaacGgcucuaaaacacug.....  | 30    | 1 | seq |
| .....accuaaaacugcuUaaacacugc.....   | 1     | 1 | seq |
| .....accuaaaacugcucuaaaacacuAc..... | 1     | 1 | seq |
| .....accuaaaacugcucuaaaacacugA..... | 4     | 1 | seq |
| .....accuaaaacugcucuaaaacacugc..... | 104   | 0 | seq |
| .....accuaaaacugcucuaaaacacugG..... | 4     | 1 | seq |
| .....accuaaaacugcucuaaaacacugU..... | 25    | 1 | seq |
| .....ccuaaaacugcucuaaaacac.....     | 2     | 0 | seq |
| .....ccuaaaacugcucuaaaacacu.....    | 2     | 0 | seq |
| .....ccuaaaacugcucuaaaacacG.....    | 1     | 1 | seq |
| .....ccuaaaacugcucuaaaacacug.....   | 37    | 0 | seq |
| .....ccuaaaacugcucuaaaacacuA.....   | 1     | 1 | seq |
| .....cUuaaaacugcucuaaaacacug.....   | 1     | 1 | seq |
| .....ccuaaaacugcucuaaaacacugA.....  | 6     | 1 | seq |
| .....ccuaaaacugcucuaaaacacugG.....  | 1     | 1 | seq |
| .....ccuaaaacugcucuaGaacugc.....    | 2     | 1 | seq |
| .....ccuaaaacugcucuaaaacacugU.....  | 31    | 1 | seq |
| .....ccuaaaacugcucuaaaacUugc.....   | 1     | 1 | seq |

## Mature

## Star

gguuuuuuucaaagaaaccuaaaacugcucaaacacugcagcucuugcuaaaacauugcaugcuaagauugcaguguuugagcaguuuuuugcuggaaaaacaaauuuc

|                                     |     |   |     |
|-------------------------------------|-----|---|-----|
| .....Gcuaaacugcucaaaacacugc.....    | 1   | 1 | seq |
| .....ccuaaaacugcucaaGcacugc.....    | 1   | 1 | seq |
| .....ccuaaaacugcucaaaacacugc.....   | 198 | 0 | seq |
| .....ccuaaaacugcucaaaacacuCc.....   | 1   | 1 | seq |
| .....ccuaaaacCgcucaaaacacugc.....   | 1   | 1 | seq |
| .....ccAaaacugcucaaaacacugc.....    | 1   | 1 | seq |
| .....cuaaacugcucaaaacacu.....       | 4   | 0 | seq |
| .....cuaaacugcucaaaacacuU.....      | 1   | 1 | seq |
| .....cuaaacugcucaaaacacug.....      | 13  | 0 | seq |
| .....cuaaacugcucaGacacugc.....      | 1   | 1 | seq |
| .....cuaaacugcucaaaacacugc.....     | 45  | 0 | seq |
| .....cuaaacugcucaaaacacugU.....     | 8   | 1 | seq |
| .....cuaaacugcucaaaacacugA.....     | 2   | 1 | seq |
| .....cuaaacugcucaaaGacugca.....     | 1   | 1 | seq |
| .....cuaaacugcucaaaacacugca.....    | 3   | 0 | seq |
| .....cuaaacugcucaaaacacugcaU.....   | 2   | 1 | seq |
| .....cuaaacugcucaaaacacugcaUu.....  | 4   | 1 | seq |
| .....uaaacugcucaGacacu.....         | 1   | 1 | seq |
| .....uaaacugcCcaaacacu.....         | 1   | 1 | seq |
| .....uaaacugcucaaaacacG.....        | 2   | 1 | seq |
| .....uaaacugcucaaaacacA.....        | 1   | 1 | seq |
| .....uaaacugcucaaaacacu.....        | 38  | 0 | seq |
| .....uaaacugcucaaaacacCg.....       | 1   | 1 | seq |
| .....uaaacugcucaaaacacug.....       | 151 | 0 | seq |
| .....uaaGcugcucaaaacacug.....       | 2   | 1 | seq |
| .....uaaacugcucaaaacacAg.....       | 1   | 1 | seq |
| .....uaaacugcucaaaacacuU.....       | 2   | 1 | seq |
| .....uaaacugcucaaaacacuA.....       | 7   | 1 | seq |
| .....uGaacugcucaaaacacug.....       | 1   | 1 | seq |
| .....uaaacugcCcaaacacug.....        | 1   | 1 | seq |
| .....uaaacugcGcaaacacug.....        | 1   | 1 | seq |
| .....uaGacugcucaaaacacug.....       | 1   | 1 | seq |
| .....uaaacugcucaGacacug.....        | 1   | 1 | seq |
| .....uaaacugcucaaaacacugA.....      | 3   | 1 | seq |
| .....uaaacugcucaaaacacugU.....      | 12  | 1 | seq |
| .....uaaacugcucUaacacugc.....       | 1   | 1 | seq |
| .....uaaacugcucaaaacacugc.....      | 114 | 0 | seq |
| .....uaUacugcucaaaacacugc.....      | 1   | 1 | seq |
| .....uaaacugcucaaaacacugcG.....     | 2   | 1 | seq |
| .....uaaacugcucaaaacacugca.....     | 64  | 0 | seq |
| .....uGaacugcucaaaacacugca.....     | 2   | 1 | seq |
| .....uaaacugcucGaacacugca.....      | 2   | 1 | seq |
| .....uaaacCgcucaaaacacugca.....     | 1   | 1 | seq |
| .....uaaacugcucaaaacacugUa.....     | 1   | 1 | seq |
| .....uaaacugcucaaaacacugcaC.....    | 3   | 1 | seq |
| .....uaaacugcucaaaacacugcaU.....    | 13  | 1 | seq |
| .....uaaacugcucaaaacacugcag.....    | 2   | 0 | seq |
| .....uaaacugcucaaaacacugcagA.....   | 1   | 1 | seq |
| .....uaaacugcucaaaacacugcaUu.....   | 14  | 1 | seq |
| .....uaaacugcucaaaacacugcagG.....   | 1   | 1 | seq |
| .....uaaacugcucaaaacacugcagGc.....  | 3   | 1 | seq |
| .....uaaacugcucaaaacacugcaguc.....  | 2   | 0 | seq |
| .....uaaacugcucaaaacacugcagucA..... | 1   | 1 | seq |
| .....Caacugcucaaaacacug.....        | 1   | 1 | seq |
| .....Gaacugcucaaaacacug.....        | 1   | 1 | seq |
| .....aaacugcucaaaacacug.....        | 14  | 0 | seq |
| .....aaacugcucaaaacacuA.....        | 2   | 1 | seq |
| .....aaacugcucaaaacacugc.....       | 6   | 0 | seq |
| .....aaacugcucaaaacacugU.....       | 1   | 1 | seq |
| .....aaacugcucaaaacacugca.....      | 1   | 0 | seq |
| .....aacugcucaaaacacugc.....        | 3   | 0 | seq |
| .....aacugcucaaaacacugca.....       | 1   | 0 | seq |
| .....aacugcucaaaacacugcaUu.....     | 1   | 1 | seq |
| .....cugAucaaaacacugcagu.....       | 1   | 1 | seq |
| .....caguguuugGgcaguuuaugu.....     | 1   | 1 | seq |
| .....aguguuugagcaguuuaugC.....      | 1   | 1 | seq |
| .....agugCuugagcaguuuauguu.....     | 1   | 1 | seq |
| .....aguguuugagcaguuuauguC.....     | 3   | 1 | seq |
| .....aguguuugagcagCuuauguu.....     | 1   | 1 | seq |
| .....aguguuugagcaguuuauguu.....     | 23  | 0 | seq |

| Mature                                                                                                              | Star |   |     |  |
|---------------------------------------------------------------------------------------------------------------------|------|---|-----|--|
| gguuuuuuucaaagaaaccuaaaacugcucaaacacugcagucuuugcuaaaacauugcaugucaagaauugcaguguuugagcaguuuauuguuuuucuggaaaaacaaaauuc |      |   |     |  |
| .....aguguuugagcaguuuauuguu.....                                                                                    | 2    | 0 | seq |  |
| .....guguuugagcaguuuauugu.....                                                                                      | 1    | 0 | seq |  |
| .....guguuugagcaguuuauugu.....                                                                                      | 2    | 0 | seq |  |
| .....guguuugagcaguuuauugu.....                                                                                      | 1    | 1 | seq |  |
| .....guguuugagcaguuuauuguC.....                                                                                     | 1    | 1 | seq |  |
| .....guguuugagcaguuuauugu.....                                                                                      | 14   | 0 | seq |  |
| .....guguuugagcaguuuGuguu.....                                                                                      | 1    | 1 | seq |  |
| .....guguuugagcaguuuauuguuC.....                                                                                    | 1    | 1 | seq |  |
| .....ugCuugagcaguuuauuguuu.....                                                                                     | 1    | 1 | seq |  |
| .....uguuugagcaguuuauuguuu.....                                                                                     | 2    | 0 | seq |  |
| .....uguuugagcaguuuauuguuC.....                                                                                     | 12   | 1 | seq |  |

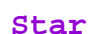[illegible]

## Mature

## Star

|                                                                                                                                 |    |   |     |
|---------------------------------------------------------------------------------------------------------------------------------|----|---|-----|
| aaauuuguuuuuccagaaaaa <u>uaaacugcucaaaacacug</u> caaucuugacaugcaauguuuuagcaagacugcaguguuugagcaguuuagguuuc <u>uug</u> aaaaaaaccu |    |   |     |
| .....uaaacugcucaaaacacugcG.....                                                                                                 | 2  | 1 | seq |
| .....uaaacugcucaaaacacugUa.....                                                                                                 | 1  | 1 | seq |
| .....uaaacCgcucaaaacacugca.....                                                                                                 | 1  | 1 | seq |
| .....uaaacugcucaaaacacugcaa.....                                                                                                | 1  | 0 | seq |
| .....uaaacugcucaaaacacugcaC.....                                                                                                | 3  | 1 | seq |
| .....uaaacugcucaaaacacugcaU.....                                                                                                | 13 | 1 | seq |
| .....uaaacugcucaaaacacugcaUu.....                                                                                               | 14 | 1 | seq |
| .....uaaacugcucaaaacacugcaaG.....                                                                                               | 1  | 1 | seq |
| .....uaaacugcucaaaacacugcaaGc.....                                                                                              | 1  | 1 | seq |
| .....aaacugcucaaaacacuA.....                                                                                                    | 2  | 1 | seq |
| .....Gaacugcucaaaacacug.....                                                                                                    | 1  | 1 | seq |
| .....aaacugcucaaaacacug.....                                                                                                    | 14 | 0 | seq |
| .....Caacugcucaaaacacug.....                                                                                                    | 1  | 1 | seq |
| .....aaacugcucaaaacacugU.....                                                                                                   | 1  | 1 | seq |
| .....aaacugcucaaaacacugc.....                                                                                                   | 6  | 0 | seq |
| .....aaacugcucaaaacacugca.....                                                                                                  | 1  | 0 | seq |
| .....aacugcucaaaacacugc.....                                                                                                    | 3  | 0 | seq |
| .....aacugcucaaaacacugca.....                                                                                                   | 1  | 0 | seq |
| .....aacugcucaaaacacugcaUu.....                                                                                                 | 1  | 1 | seq |
| .....acugcucaaaGacugcaaucu.....                                                                                                 | 1  | 1 | seq |
| .....Ccaagacugcaguuuagagc.....                                                                                                  | 1  | 1 | seq |
| .....aagacugcaCuguuuga.....                                                                                                     | 1  | 1 | seq |
| .....agacugcaguuuagagc.....                                                                                                     | 1  | 0 | seq |
| .....agacugcaguuuagagca.....                                                                                                    | 1  | 0 | seq |
| .....guguuuagagcaguuuaUguuuc.....                                                                                               | 1  | 1 | seq |
| .....uguuuagagcaguuuaUguuuc.....                                                                                                | 12 | 1 | seq |

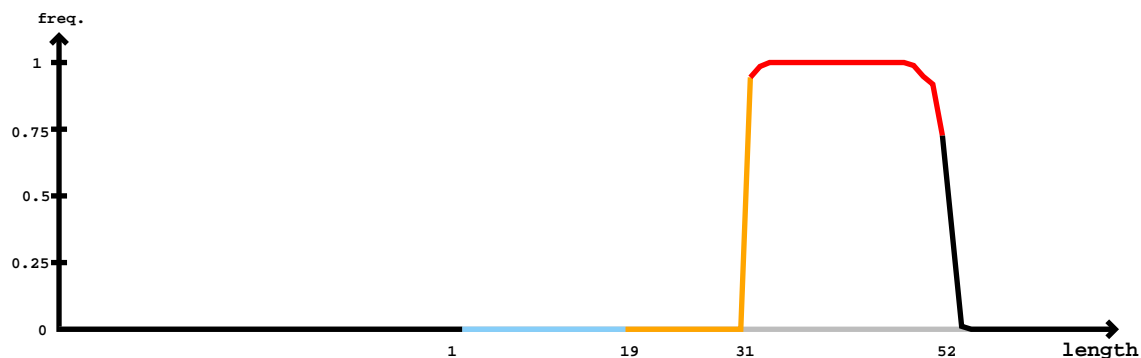

| 5' | uuuuucaucauggacuaauacauccuuagucuucaauu                                                | gggagggaagauguuuc | aaugaugugaa | aaugucgaugcuccuc | cgaauacaacu | gauguuag | -3'   | exp |        |
|----|---------------------------------------------------------------------------------------|-------------------|-------------|------------------|-------------|----------|-------|-----|--------|
|    | .....(((((((.....))))))....((((((((((((((((((((((((.....))))))))))))))....))))))..... |                   |             |                  |             |          | reads | mm  | sample |
|    | .....aaugucgaugcuccuU.....                                                            |                   |             |                  |             |          | 1     | 1   | seq    |
|    | .....aaugucgaugcuccuc.....                                                            |                   |             |                  |             |          | 1     | 0   | seq    |
|    | .....aauguAgaugcuccuc.....                                                            |                   |             |                  |             |          | 1     | 1   | seq    |
|    | .....aaugucgaugcuccucC.....                                                           |                   |             |                  |             |          | 2     | 1   | seq    |
|    | .....aaugucgaugcuccucu.....                                                           |                   |             |                  |             |          | 7     | 0   | seq    |
|    | .....aaugucgaugcuccucA.....                                                           |                   |             |                  |             |          | 1     | 1   | seq    |
|    | .....aaugucgauAuccucu.....                                                            |                   |             |                  |             |          | 1     | 1   | seq    |
|    | .....aaugucgaugcuccucuc.....                                                          |                   |             |                  |             |          | 5     | 0   | seq    |
|    | .....aaugucgaugcuccucuU.....                                                          |                   |             |                  |             |          | 1     | 1   | seq    |
|    | .....aaugucgaugcuccucucC.....                                                         |                   |             |                  |             |          | 45    | 1   | seq    |
|    | .....aaugucgaugcuccucucA.....                                                         |                   |             |                  |             |          | 1     | 1   | seq    |
|    | .....aaugucgaugcuccucucU.....                                                         |                   |             |                  |             |          | 5     | 1   | seq    |
|    | .....aaugucgaugcuccucucCa.....                                                        |                   |             |                  |             |          | 183   | 1   | seq    |
|    | .....aaugucgaugcuccucucCau.....                                                       |                   |             |                  |             |          | 1     | 1   | seq    |
|    | .....uagucgaugcuccucuc.....                                                           |                   |             |                  |             |          | 1     | 0   | seq    |
|    | .....uagucgaugcuccucucU.....                                                          |                   |             |                  |             |          | 1     | 1   | seq    |
|    | .....uagucgaugcuccucucCa.....                                                         |                   |             |                  |             |          | 1     | 1   | seq    |
|    | .....uagucgaugcuccucucCau.....                                                        |                   |             |                  |             |          | 8     | 1   | seq    |
|    | .....uagucgaugcuccucuc.....                                                           |                   |             |                  |             |          | 1     | 0   | seq    |
|    | .....uagucgaugcuccucucCauu.....                                                       |                   |             |                  |             |          | 3     | 1   | seq    |

Provisional ID : MA\_298053\_29474  
Score total : 1115.2  
Score for star read(s) : 3.9  
Score for read counts : 1110  
Score for mfe : -0.3  
Score for randfold : 1.6  
Score for cons. seed :  
Total read count : 2189  
Mature read count : 2185  
Loop read count : 0  
Star read count : 4

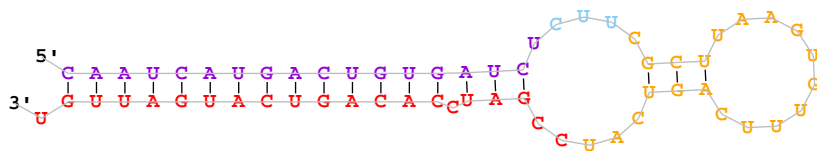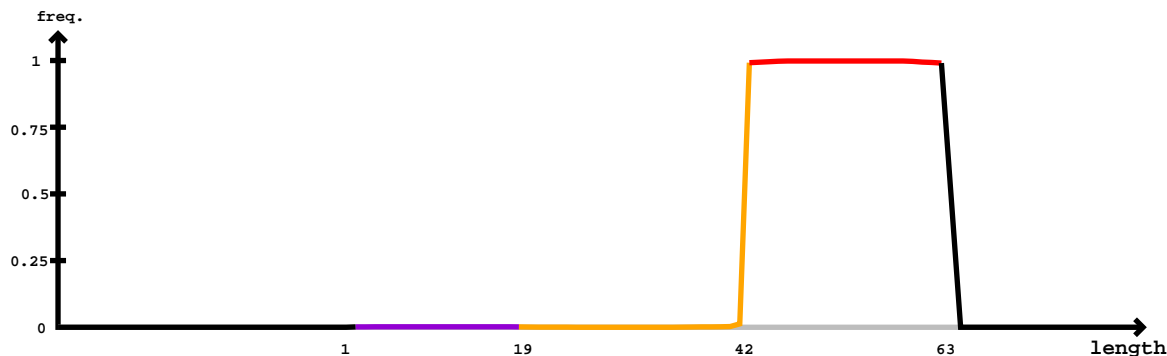

## Star

## Mature

|    |                                                                                                               |                     |                        |                      |                    |       |     |        |
|----|---------------------------------------------------------------------------------------------------------------|---------------------|------------------------|----------------------|--------------------|-------|-----|--------|
| 5' | ccuucagagucacaucauguacuuuuuac                                                                                 | caaucaugacugugaucu  | cucgcuuuaguguuucagucac | ccgauccacagucagauugu | gaaucacuuuagagauug | -3'   | obs |        |
|    | ccuucagagucacaucauguacuuuuuacc                                                                                | aaucaugacugugaucucu | cgcuuuaguguuucagucac   | ccgauccacagucagauugu | gaaucacuuuagagauug |       | exp |        |
|    | .....(((((((.....)))))).....(((((((((((((((((((.....((((.....)))).....)))))))))))))))).....((((.....))))..... |                     |                        |                      |                    | reads | mm  | sample |
|    | .....caaucaugacugCgauc.....                                                                                   |                     |                        |                      |                    | 1     | 1   | seq    |
|    | .....caaucaugacugCgauc.....                                                                                   |                     |                        |                      |                    | 2     | 1   | seq    |
|    | .....aucaugaUugugaucucucg.....                                                                                |                     |                        |                      |                    | 1     | 1   | seq    |
|    | .....cagGcauccgauccacagucagauugu.....                                                                         |                     |                        |                      |                    | 1     | 1   | seq    |
|    | .....agGcauccgauccacagucagauugu.....                                                                          |                     |                        |                      |                    | 1     | 1   | seq    |
|    | .....gGcauccgauccacagucagauugu.....                                                                           |                     |                        |                      |                    | 1     | 1   | seq    |
|    | .....cauccgGuccacagucagauugu.....                                                                             |                     |                        |                      |                    | 1     | 1   | seq    |
|    | .....auccgauccacagucagauugu.....                                                                              |                     |                        |                      |                    | 1     | 0   | seq    |
|    | .....auccgauccacagucagauugG.....                                                                              |                     |                        |                      |                    | 1     | 1   | seq    |
|    | .....uccgauccacagucagauug.....                                                                                |                     |                        |                      |                    | 1     | 0   | seq    |
|    | .....uccgauccacagucagauugC.....                                                                               |                     |                        |                      |                    | 3     | 1   | seq    |
|    | .....Cccgauccacagucagauugu.....                                                                               |                     |                        |                      |                    | 1     | 1   | seq    |
|    | .....uccgauccacagucagauugu.....                                                                               |                     |                        |                      |                    | 17    | 0   | seq    |
|    | .....ccgauccacagucauga.....                                                                                   |                     |                        |                      |                    | 3     | 0   | seq    |
|    | .....ccgauccacagucaugau.....                                                                                  |                     |                        |                      |                    | 5     | 0   | seq    |
|    | .....ccgauccacagucaugaC.....                                                                                  |                     |                        |                      |                    | 1     | 1   | seq    |
|    | .....ccgauccacagucaugau.....                                                                                  |                     |                        |                      |                    | 3     | 0   | seq    |
|    | .....ccgauccacagucaugaCug.....                                                                                |                     |                        |                      |                    | 1     | 1   | seq    |
|    | .....ccgauccacagucaugauug.....                                                                                |                     |                        |                      |                    | 3     | 0   | seq    |
|    | .....ccgauAacacagucagauugu.....                                                                               |                     |                        |                      |                    | 1     | 1   | seq    |
|    | .....ccgauccacaAucagauugu.....                                                                                |                     |                        |                      |                    | 1     | 1   | seq    |
|    | .....Ncgauccacagucagauugu.....                                                                                |                     |                        |                      |                    | 3     | 1   | seq    |
|    | .....ccgauccacagGcagauugu.....                                                                                |                     |                        |                      |                    | 1     | 1   | seq    |
|    | .....ccAuccacagucagauugu.....                                                                                 |                     |                        |                      |                    | 4     | 1   | seq    |
|    | .....ccgauccacagucaCgauugu.....                                                                               |                     |                        |                      |                    | 3     | 1   | seq    |
|    | .....ccgauccaAagucagauugu.....                                                                                |                     |                        |                      |                    | 1     | 1   | seq    |
|    | .....Acgauccacagucagauugu.....                                                                                |                     |                        |                      |                    | 1     | 1   | seq    |
|    | .....Gcgauccacagucagauugu.....                                                                                |                     |                        |                      |                    | 1     | 1   | seq    |
|    | .....ccgauccGcagucagauugu.....                                                                                |                     |                        |                      |                    | 4     | 1   | seq    |
|    | .....ccgauccacagucaugaCugu.....                                                                               |                     |                        |                      |                    | 2     | 1   | seq    |
|    | .....ccgauccacUgucagauugu.....                                                                                |                     |                        |                      |                    | 2     | 1   | seq    |
|    | .....ccgauccacagucagauuAu.....                                                                                |                     |                        |                      |                    | 2     | 1   | seq    |
|    | .....ccgauccacagucagauugC.....                                                                                |                     |                        |                      |                    | 295   | 1   | seq    |

## Star

## Mature

|                                |                                         |           |          |          |             |           |  |  |  |
|--------------------------------|-----------------------------------------|-----------|----------|----------|-------------|-----------|--|--|--|
| ccuucagagucaaucauguacuuuuauuac | caucaugacugugaucucuucgcuuaaguguuuucaguc | auccgauc  | ccacaguc | augauugu | gaauacucauu | aagagauug |  |  |  |
| .....                          | ccgaGccacaguc                           | augauugu  | .....    | 1        | 1           | seq       |  |  |  |
| .....                          | ccgaCccacaguc                           | augauugu  | .....    | 4        | 1           | seq       |  |  |  |
| .....                          | ccCauccacaguc                           | augauugu  | .....    | 1        | 1           | seq       |  |  |  |
| .....                          | ccgauccacaguc                           | Uaugauugu | .....    | 1        | 1           | seq       |  |  |  |
| .....                          | ccgauccacaguc                           | Gugauugu  | .....    | 4        | 1           | seq       |  |  |  |
| .....                          | ccgauccacaCuc                           | augauugu  | .....    | 1        | 1           | seq       |  |  |  |
| .....                          | ccgaucAacaguc                           | augauugu  | .....    | 1        | 1           | seq       |  |  |  |
| .....                          | ccgauccacaguc                           | augauugu  | .....    | 1699     | 0           | seq       |  |  |  |
| .....                          | ccgauccacaguc                           | augGuugu  | .....    | 7        | 1           | seq       |  |  |  |
| .....                          | ccgauccacaguc                           | auUauugu  | .....    | 1        | 1           | seq       |  |  |  |
| .....                          | ccgauccaUaguc                           | augauugu  | .....    | 1        | 1           | seq       |  |  |  |
| .....                          | ccgauccacaguc                           | augauugA  | .....    | 21       | 1           | seq       |  |  |  |
| .....                          | Ucgauccacaguc                           | augauugu  | .....    | 1        | 1           | seq       |  |  |  |
| .....                          | ccgaucUacaguc                           | augauugu  | .....    | 2        | 1           | seq       |  |  |  |
| .....                          | ccgGuccacaguc                           | augauugu  | .....    | 4        | 1           | seq       |  |  |  |
| .....                          | cUgauccacaguc                           | augauugu  | .....    | 3        | 1           | seq       |  |  |  |
| .....                          | ccgauccacaguc                           | augauCgu  | .....    | 3        | 1           | seq       |  |  |  |
| .....                          | ccgauccacaguc                           | augauugG  | .....    | 40       | 1           | seq       |  |  |  |
| .....                          | ccgauccacGguc                           | augauugu  | .....    | 3        | 1           | seq       |  |  |  |
| .....                          | ccgauccacagA                            | augauugu  | .....    | 2        | 1           | seq       |  |  |  |
| .....                          | ccgauccacagC                            | augauugu  | .....    | 6        | 1           | seq       |  |  |  |
| .....                          | ccgauccacaguc                           | augUuugu  | .....    | 1        | 1           | seq       |  |  |  |
| .....                          | ccgauccacaguc                           | augauuguA | .....    | 3        | 1           | seq       |  |  |  |
| .....                          | cgauccacaguc                            | augauugu  | .....    | 2        | 0           | seq       |  |  |  |
| .....                          | cgauccacaguc                            | augauugug | .....    | 2        | 0           | seq       |  |  |  |
| .....                          | gauccacaguc                             | augauugA  | .....    | 1        | 1           | seq       |  |  |  |
| .....                          | gauccacaguc                             | augauugu  | .....    | 2        | 0           | seq       |  |  |  |
| .....                          | gauccacaguc                             | augauugC  | .....    | 1        | 1           | seq       |  |  |  |
| .....                          | auccacaguc                              | augauugu  | .....    | 2        | 0           | seq       |  |  |  |
| .....                          | auccacaguc                              | augauugC  | .....    | 1        | 1           | seq       |  |  |  |
| .....                          | auccacaguc                              | augauugug | .....    | 1        | 0           | seq       |  |  |  |
| .....                          | uccacaguc                               | augauugu  | .....    | 1        | 0           | seq       |  |  |  |
| .....                          | Cccacaguc                               | augauugu  | .....    | 1        | 1           | seq       |  |  |  |



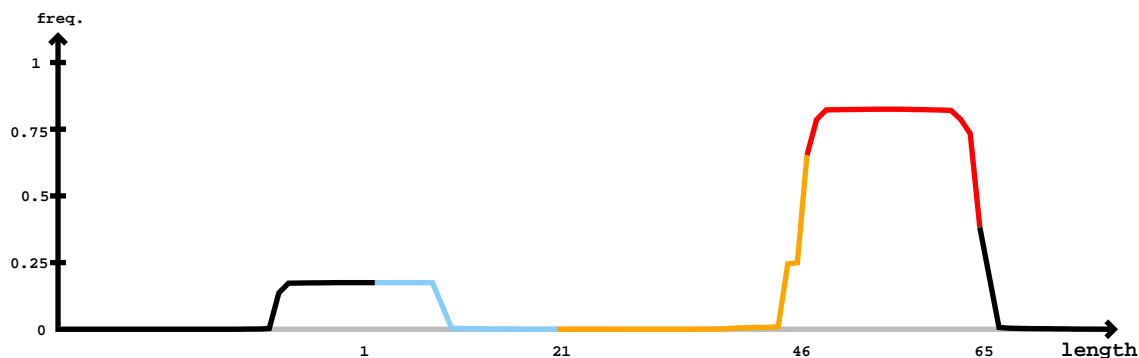

## Mature

[illegible]

## Star

## Mature

|                                                                                                              |     |   |     |
|--------------------------------------------------------------------------------------------------------------|-----|---|-----|
| uaccuuuuuuuuauugaggaaccugaggucgagaguucgagccucuuucaccccauuauacauuuuuauugaggaauccugaggucgagaguucgagccucucucacc |     |   |     |
| .....ccugaggucgagaguCcg.....                                                                                 | 2   | 1 | seq |
| .....ccugaggucgagagAucg.....                                                                                 | 4   | 1 | seq |
| .....ccugaggucgagaguucgga.....                                                                               | 2   | 0 | seq |
| .....ccugaggucgagaguucgag.....                                                                               | 4   | 0 | seq |
| .....ccugaggucgagaguucgGgc.....                                                                              | 2   | 1 | seq |
| .....ccugaggucgagaguucgagcc.....                                                                             | 2   | 0 | seq |
| .....ccugaggucgagaguucgagccu.....                                                                            | 2   | 0 | seq |
| .....cugaggucgUgaguucg.....                                                                                  | 2   | 1 | seq |
| .....cugaggucgagaguGcg.....                                                                                  | 2   | 1 | seq |
| .....cugaggucgagGguucg.....                                                                                  | 4   | 1 | seq |
| .....cugaggucgagagCucg.....                                                                                  | 4   | 1 | seq |
| .....cugaggucgagCguucg.....                                                                                  | 2   | 1 | seq |
| .....Gugaggucgagaguucg.....                                                                                  | 4   | 1 | seq |
| .....cugaggucgGgaguucg.....                                                                                  | 4   | 1 | seq |
| .....cugGgucgagaguucg.....                                                                                   | 6   | 1 | seq |
| .....cugaggucgagaguucg.....                                                                                  | 640 | 0 | seq |
| .....cugaggucAagaguucg.....                                                                                  | 4   | 1 | seq |
| .....cugaggucgagaguucgag.....                                                                                | 2   | 0 | seq |
| .....cugaggucgagaguucgagc.....                                                                               | 4   | 0 | seq |
| .....cugaggucgagaguucgGgc.....                                                                               | 2   | 1 | seq |
| .....cugaggucgagaguucgagcc.....                                                                              | 2   | 0 | seq |
| .....ugaggucgagaguucgUg.....                                                                                 | 2   | 1 | seq |
| .....ugaggucgagaguucgag.....                                                                                 | 4   | 0 | seq |
| .....ugaggucgagaguucgagc.....                                                                                | 4   | 0 | seq |
| .....gaggucgagaguucgag.....                                                                                  | 4   | 0 | seq |
| .....gaggucgagaguucgagc.....                                                                                 | 2   | 0 | seq |
| .....gaggucgagaguucgGgcc.....                                                                                | 2   | 1 | seq |
| .....gaggucgagaguucgGgccucu.....                                                                             | 2   | 1 | seq |
| .....aggucgagaguucgagcc.....                                                                                 | 2   | 0 | seq |
| .....aggucgagaguucgUgccucu.....                                                                              | 2   | 1 | seq |
| .....ggucgagaguucgGgcc.....                                                                                  | 4   | 1 | seq |
| .....ggucgagaguucgagccucu.....                                                                               | 2   | 0 | seq |
| .....gucgagaguucgUgccu.....                                                                                  | 2   | 1 | seq |
| .....gucgagaguucgGgccu.....                                                                                  | 2   | 1 | seq |
| .....gucgagaguucgGgccuc.....                                                                                 | 2   | 1 | seq |
| .....gucgagaguucgagccuC.....                                                                                 | 2   | 1 | seq |
| .....gucgagaguucgagccucu.....                                                                                | 2   | 0 | seq |
| .....gccucuucaccccaCu.....                                                                                   | 1   | 1 | seq |
| .....uCauugaggaauccugaggucgag.....                                                                           | 1   | 1 | seq |
| .....uAauugaggaauccugaggucgagaguucg.....                                                                     | 1   | 1 | seq |
| .....Aauugaggaauccugaggucgagaguuc.....                                                                       | 1   | 1 | seq |
| .....auugagAaauccugaggucg.....                                                                               | 1   | 1 | seq |
| .....aCugaggaauccugaggucgaga.....                                                                            | 2   | 1 | seq |
| .....aCugaggaauccugaggucgagag.....                                                                           | 1   | 1 | seq |
| .....Uuugaggaauccugaggucgagaguuc.....                                                                        | 2   | 1 | seq |
| .....Uuugaggaauccugaggucgagaguucg.....                                                                       | 2   | 1 | seq |
| .....uugaggaauccugaggucg.....                                                                                | 1   | 0 | seq |
| .....Cugaggaauccugaggucg.....                                                                                | 2   | 1 | seq |
| .....Cugaggaauccugaggucga.....                                                                               | 2   | 1 | seq |
| .....uugaggaauccugaggucgag.....                                                                              | 2   | 0 | seq |
| .....uugaggaauccugGggucgag.....                                                                              | 1   | 1 | seq |
| .....Cugaggaauccugaggucgaga.....                                                                             | 1   | 1 | seq |
| .....uugaggaauccugaggucgaga.....                                                                             | 1   | 0 | seq |
| .....uugaggaaUcugaggucgagagu.....                                                                            | 1   | 1 | seq |
| .....uugaggaauccugaggucgagagu.....                                                                           | 4   | 0 | seq |
| .....uugaggaauccugaggucgagaguuc.....                                                                         | 1   | 0 | seq |
| .....uugaggaauccugaggucgagaguucA.....                                                                        | 1   | 1 | seq |
| .....uugaggaauccugaggucgagaguucg.....                                                                        | 5   | 0 | seq |
| .....uugaggaauccugaggucgagaguucgagccucu.....                                                                 | 1   | 0 | seq |
| .....ugaggaauccugaggucg.....                                                                                 | 1   | 0 | seq |
| .....ugaggaauccugaggucA.....                                                                                 | 1   | 1 | seq |
| .....ugaggaauccugaggucga.....                                                                                | 2   | 0 | seq |
| .....ugaggaauccugaggucgag.....                                                                               | 1   | 0 | seq |
| .....ugaggaauccugaggucgaga.....                                                                              | 2   | 0 | seq |
| .....ugaggaauccugaggucgagagu.....                                                                            | 2   | 0 | seq |
| .....ugaggaauccugaggucgagaguuc.....                                                                          | 1   | 0 | seq |
| .....ugaggaauccugaggucgagaguucg.....                                                                         | 2   | 0 | seq |
| .....ugaggaaUcugaggucgagaguucgagccucucacc.....                                                               | 1   | 1 | seq |
| .....gaggaauccugaggucg.....                                                                                  | 3   | 0 | seq |
| .....gaggaauccugaggucga.....                                                                                 | 1   | 0 | seq |

## Star

## Mature

uaccuuuuuuuuauugaggaacccugaggucgagaguucgagccucuuucaccccauuauacauuuuuauugaggaauccugaggucgagaguucgagccucucacacc

|                                   |     |   |     |
|-----------------------------------|-----|---|-----|
| .....gaggaauccugaggucgag.....     | 2   | 0 | seq |
| .....gaggaauccugaggucgaga.....    | 1   | 0 | seq |
| .....gaggaauccugaggucgagagu.....  | 1   | 0 | seq |
| .....gaggaauccugaggucgagaguu..... | 1   | 0 | seq |
| .....aggaauccugaggucga.....       | 1   | 0 | seq |
| .....aggaauccugaggucgag.....      | 1   | 0 | seq |
| .....aggaauccugaggucgaga.....     | 1   | 0 | seq |
| .....aggaauccugaggucgagagu.....   | 4   | 0 | seq |
| .....aggaauccugaggucgagaguu.....  | 1   | 0 | seq |
| .....aggaauccugaggucgagaguuc..... | 1   | 0 | seq |
| .....ggaauccugaggucgagaguucg..... | 1   | 0 | seq |
| .....gaauccugaggucgagagu.....     | 1   | 0 | seq |
| .....Naauccugaggucgagagu.....     | 2   | 1 | seq |
| .....Caauccugaggucgagagu.....     | 3   | 1 | seq |
| .....Caauccugaggucgagaguu.....    | 1   | 1 | seq |
| .....Caauccugaggucgagaguuc.....   | 3   | 1 | seq |
| .....Naauccugaggucgagaguuc.....   | 3   | 1 | seq |
| .....gaauccugaggucgagaguuc.....   | 3   | 0 | seq |
| .....gaauccugaggucgagaguucg.....  | 3   | 0 | seq |
| .....Naauccugaggucgagaguucg.....  | 1   | 1 | seq |
| .....Caauccugaggucgagaguucg.....  | 1   | 1 | seq |
| .....aauccugaggucgagag.....       | 13  | 0 | seq |
| .....aauccugaggucgagagA.....      | 1   | 1 | seq |
| .....aauccugUggucgagagu.....      | 1   | 1 | seq |
| .....aaucUgaggucgagagu.....       | 1   | 1 | seq |
| .....Cauccugaggucgagagu.....      | 1   | 1 | seq |
| .....aauccugGggucgagagu.....      | 1   | 1 | seq |
| .....aauccugaggucgagagA.....      | 3   | 1 | seq |
| .....aauccugaggucgagagG.....      | 14  | 1 | seq |
| .....aauccugaggucgagagu.....      | 256 | 0 | seq |
| .....aauccugaggucgGgagu.....      | 1   | 1 | seq |
| .....aauccugaggucgagaguC.....     | 15  | 1 | seq |
| .....aauccugaggucgagaguG.....     | 4   | 1 | seq |
| .....aauccugaggucgGgaguu.....     | 1   | 1 | seq |
| .....aauccugGggucgagaguu.....     | 2   | 1 | seq |
| .....aauccugaggucgagaguA.....     | 1   | 1 | seq |
| .....aauccugaCgucgagaguu.....     | 1   | 1 | seq |
| .....aauccugaggucgagaguu.....     | 109 | 0 | seq |
| .....aauccugaggucgagagCuc.....    | 2   | 1 | seq |
| .....aauccugaggucgagagAuc.....    | 1   | 1 | seq |
| .....aauccugGggucgagaguuc.....    | 2   | 1 | seq |
| .....aauccugaggucgagaguCc.....    | 6   | 1 | seq |
| .....aauccugaggucgGgaguuc.....    | 1   | 1 | seq |
| .....aauccugaggucgagagGuc.....    | 1   | 1 | seq |
| .....aauccugaggucgagaguuA.....    | 7   | 1 | seq |
| .....aauccugagguAagagaguuc.....   | 1   | 1 | seq |
| .....aauccugaggucgagaguGc.....    | 1   | 1 | seq |
| .....aauccuAaggucgagaguuc.....    | 1   | 1 | seq |
| .....aauccugaggucgagaguuc.....    | 792 | 0 | seq |
| .....aauccugaAgucgagaguuc.....    | 1   | 1 | seq |
| .....aauccugaggucgagGguuc.....    | 2   | 1 | seq |
| .....aauccGgaggucgagaguuc.....    | 2   | 1 | seq |
| .....aauccuUaggucgagaguuc.....    | 1   | 1 | seq |
| .....aauccuUaggucgagaguucg.....   | 1   | 1 | seq |
| .....aaucGugaggucgagaguucg.....   | 1   | 1 | seq |
| .....aaGccugaggucgagaguucg.....   | 2   | 1 | seq |
| .....aauccugaggucgagGguucg.....   | 7   | 1 | seq |
| .....aauccugaggucgagaCuucg.....   | 1   | 1 | seq |
| .....aauccugaggucgagaguucg.....   | 906 | 0 | seq |
| .....aauccugUggucgagaguucg.....   | 2   | 1 | seq |
| .....aauccugaggucgagagGucg.....   | 3   | 1 | seq |
| .....Nauccugaggucgagaguucg.....   | 2   | 1 | seq |
| .....aauccugaggucgagaguCc.....    | 3   | 1 | seq |
| .....aauccugagAucgagaguucg.....   | 1   | 1 | seq |
| .....aauccugaUgucgagaguucg.....   | 1   | 1 | seq |
| .....aauccugaggucgagaguucU.....   | 5   | 1 | seq |
| .....aauccugaggucgagagCucg.....   | 2   | 1 | seq |
| .....aauccugaggucgagagAucg.....   | 2   | 1 | seq |
| .....aauccugCggucgagaguucg.....   | 1   | 1 | seq |

## Star

## Mature

uaccuuuuuuuuauugaggaaccugaggucgagaguucgagccucuuucaccccauuauacauuuuuauugaggaauccugaggucgagaguucgagccucucacacc

|                                         |      |   |     |
|-----------------------------------------|------|---|-----|
| .....aauccuAaggucgagaguucg.....         | 1    | 1 | seq |
| .....aNuccugaggucgagaguucg.....         | 1    | 1 | seq |
| .....aauccugGggucgagaguucg.....         | 3    | 1 | seq |
| .....aauccugaggAcgagaguucg.....         | 1    | 1 | seq |
| .....Uauccugaggucgagaguucg.....         | 1    | 1 | seq |
| .....aauccugaggucgAagauucg.....         | 1    | 1 | seq |
| .....aauccugaggucAagauucg.....          | 1    | 1 | seq |
| .....aauccugaggucGgaguucg.....          | 5    | 1 | seq |
| .....aauccugaggucgagaguucgA.....        | 1    | 0 | seq |
| .....aauccugaggucgagaguucgUg.....       | 4    | 1 | seq |
| .....aauccugaggucgagaguucgGg.....       | 1    | 1 | seq |
| .....aauccugaggucgagaguucgGgc.....      | 1    | 1 | seq |
| .....aauccugaggucgagaguucgagcc.....     | 1    | 0 | seq |
| .....aauccugaggucgagaguucgagccucu.....  | 1    | 0 | seq |
| .....aauccugaggucgagaguucgGgccucucu.... | 1    | 1 | seq |
| .....aauccugaggucgagaguucgUgccucucu.... | 1    | 1 | seq |
| .....auccugaggucgagagu.....             | 14   | 0 | seq |
| .....auccugaggucgagagu.....             | 6    | 0 | seq |
| .....auccugaUgucgagaguuc.....           | 1    | 1 | seq |
| .....auccugaggucgagaguuc.....           | 9    | 0 | seq |
| .....auGcugaggucgagaguuc.....           | 1    | 1 | seq |
| .....auccugagCucgagaguuc.....           | 1    | 1 | seq |
| .....auccugaggucgagaguucg.....          | 10   | 0 | seq |
| .....auccugagCucgagaguucg.....          | 1    | 1 | seq |
| .....uccugaggucgagaCu.....              | 1    | 1 | seq |
| .....uccugaggucgagagCu.....             | 1    | 1 | seq |
| .....uccugaggucgagaguA.....             | 5    | 1 | seq |
| .....uccugaggucgagaguG.....             | 3    | 1 | seq |
| .....uccugaggucgGgagu.....              | 2    | 1 | seq |
| .....uccugGggucgagagu.....              | 5    | 1 | seq |
| .....uccugaggucgagagu.....              | 339  | 0 | seq |
| .....uccugaggucgagGgu.....              | 3    | 1 | seq |
| .....uccugUggucgagagu.....              | 1    | 1 | seq |
| .....uccugaggucgagUguuc.....            | 1    | 1 | seq |
| .....uccugaggucgagaguA.....             | 18   | 1 | seq |
| .....uccAaggucgagaguuc.....             | 2    | 1 | seq |
| .....Gccugaggucgagaguuc.....            | 4    | 1 | seq |
| .....uccugaggucgCgaguuc.....            | 1    | 1 | seq |
| .....uAccugaggucgagaguuc.....           | 1    | 1 | seq |
| .....ucUugaggucgagaguuc.....            | 1    | 1 | seq |
| .....uccugaggucgagaguAc.....            | 1    | 1 | seq |
| .....uccugaggucgGgaguuc.....            | 5    | 1 | seq |
| .....uccGgaggucgagaguuc.....            | 2    | 1 | seq |
| .....Accugaggucgagaguuc.....            | 2    | 1 | seq |
| .....uccugaggucgagagAuc.....            | 1    | 1 | seq |
| .....uccugaggucgagaAuuc.....            | 4    | 1 | seq |
| .....uccugaggucgagGguuc.....            | 2    | 1 | seq |
| .....uccugaggAcgagaguuc.....            | 1    | 1 | seq |
| .....uccugGggucgagaguuc.....            | 1    | 1 | seq |
| .....uccugaggucUagaguuc.....            | 1    | 1 | seq |
| .....uccuAaggucgagaguuc.....            | 1    | 1 | seq |
| .....Nccugaggucgagaguuc.....            | 4    | 1 | seq |
| .....uccugaggucgagaguGc.....            | 3    | 1 | seq |
| .....uccugaggucgagagGu.....             | 3    | 1 | seq |
| .....uccugaggucgagagCuc.....            | 12   | 1 | seq |
| .....uccugaggucAagaguuc.....            | 3    | 1 | seq |
| .....uccugaggGcgagaguuc.....            | 3    | 1 | seq |
| .....uccugaggucgagaguuc.....            | 1590 | 0 | seq |
| .....Gccugaggucgagaguucg.....           | 4    | 1 | seq |
| .....uUcugaggucgagaguucg.....           | 1    | 1 | seq |
| .....uccugaggucgGgaguucg.....           | 7    | 1 | seq |
| .....uccugaggucgagaguCc.....            | 5    | 1 | seq |
| .....uccugaggucgagaguAag.....           | 2    | 1 | seq |
| .....uccugaggAcgagaguucg.....           | 1    | 1 | seq |
| .....uccGgaggucgagaguucg.....           | 1    | 1 | seq |
| .....uccugaggucgagagAucg.....           | 1    | 1 | seq |
| .....uccugaggucgagaAuucg.....           | 2    | 1 | seq |
| .....ucUugaggucgagaguucg.....           | 1    | 1 | seq |
| .....uccugUggucgagaguucg.....           | 2    | 1 | seq |
| .....uccugaggucgagaguucg.....           | 1685 | 0 | seq |

## Star

## Mature

uaccuuuuuuuuauugaggaaccugaggucgagaguucgagccucuuucaccccauuauacauuuuuuuauugaggaauccugaggucgagaguucgagccucucucacc

|                                      |      |   |     |
|--------------------------------------|------|---|-----|
| .uccugaggGcgagaguucg.....            | 1    | 1 | seq |
| .uccugaggucgaAaguucg.....            | 1    | 1 | seq |
| .uccugaggucgagaguGcg.....            | 2    | 1 | seq |
| .uccugaggucgagaguucg.....            | 3    | 1 | seq |
| .uccugaggucgagaguAcg.....            | 1    | 1 | seq |
| .uccugaggucgagGguucg.....            | 12   | 1 | seq |
| .uccugaggucgagagGucg.....            | 2    | 1 | seq |
| .uccugaggucUagaguucg.....            | 1    | 1 | seq |
| .uccugaggucCagaguucg.....            | 1    | 1 | seq |
| .uccugaggucgagagCucg.....            | 2    | 1 | seq |
| .uccugaggucgagUguucg.....            | 1    | 1 | seq |
| .uccAgaggucgagaguucg.....            | 1    | 1 | seq |
| .uccugaggucgagaguucgG.....           | 1    | 1 | seq |
| .uccugaggucgagaguucgU.....           | 1    | 1 | seq |
| .uccugaggucgagaguucga.....           | 2    | 0 | seq |
| .uccugaggucgagaguucgUg.....          | 1    | 1 | seq |
| .uccugaggucgagaguucgGg.....          | 4    | 1 | seq |
| .uccugaggucgagaguucgag.....          | 7    | 0 | seq |
| .uccugaggucgagaguucgagccucuc.....    | 1    | 0 | seq |
| .uccugaggucgagaguucgagccucucu.....   | 1    | 0 | seq |
| .uccugaggucgagaguucgGccucucu.....    | 2    | 1 | seq |
| .uccugaggucgagaguucgagccucucacU..... | 1    | 1 | seq |
| .ccugaggucgagaguuc.....              | 1516 | 0 | seq |
| .ccugaggucgGgaguuc.....              | 4    | 1 | seq |
| .ccugaggucgagagCuc.....              | 6    | 1 | seq |
| .ccugGggucgagaguuc.....              | 12   | 1 | seq |
| .ccugaggucgagGguuc.....              | 6    | 1 | seq |
| .Gcugaggucgagaguuc.....              | 2    | 1 | seq |
| .Ncugaggucgagaguuc.....              | 4    | 1 | seq |
| .ccugUggucgagaguuc.....              | 4    | 1 | seq |
| .ccugaggucgagagGuc.....              | 2    | 1 | seq |
| .Ucugaggucgagaguuc.....              | 2    | 1 | seq |
| .ccugaggucgagaguGc.....              | 2    | 1 | seq |
| .ccugaggucAagaguuc.....              | 2    | 1 | seq |
| .ccugaggAagagaguuc.....              | 2    | 1 | seq |
| .ccugaggAagagaguuc.....              | 2    | 1 | seq |
| .ccAagaggucgagaguuc.....             | 2    | 1 | seq |
| .ccugaggucgagaguua.....              | 6    | 1 | seq |
| .Ucugaggucgagaguucg.....             | 4    | 1 | seq |
| .ccugaggucgGgaguucg.....             | 6    | 1 | seq |
| .ccugaggucgagaguucg.....             | 900  | 0 | seq |
| .ccugaggucgagaguCcag.....            | 2    | 1 | seq |
| .ccugaggucgagGguucg.....             | 2    | 1 | seq |
| .ccugaggucgagagAucg.....             | 4    | 1 | seq |
| .ccugaggucgagaguucga.....            | 2    | 0 | seq |
| .ccugaggucgagaguucgag.....           | 4    | 0 | seq |
| .ccugaggucgagaguucgGgc.....          | 2    | 1 | seq |
| .ccugaggucgagaguucgagcc.....         | 2    | 0 | seq |
| .ccugaggucgagaguucgagccu.....        | 2    | 0 | seq |
| .cugaggucgagagCucg.....              | 4    | 1 | seq |
| .cugaggucgagGguucg.....              | 4    | 1 | seq |
| .cugaggucgagaguucg.....              | 640  | 0 | seq |
| .cugaggucgagCguucg.....              | 2    | 1 | seq |
| .cugaggucgGgaguucg.....              | 4    | 1 | seq |
| .cugaggucgagaguGcg.....              | 2    | 1 | seq |
| .Gugaggucgagaguucg.....              | 4    | 1 | seq |
| .cugaggucAagaguucg.....              | 4    | 1 | seq |
| .cugGggucgagaguucg.....              | 6    | 1 | seq |
| .cugaggucgUgaguucg.....              | 2    | 1 | seq |
| .cugaggucgagaguucgag.....            | 2    | 0 | seq |
| .cugaggucgagaguucgagc.....           | 4    | 0 | seq |
| .cugaggucgagaguucgGgc.....           | 2    | 1 | seq |
| .cugaggucgagaguucgagcc.....          | 2    | 0 | seq |
| .cugaggucgagaguucgagccucucucacc..... | 1    | 0 | seq |
| .ugaggucgagaguucgUg.....             | 2    | 1 | seq |
| .ugaggucgagaguucgag.....             | 4    | 0 | seq |
| .ugaggucgagaguucgagc.....            | 4    | 0 | seq |
| .gaggucgagaguucgag.....              | 4    | 0 | seq |
| .gaggucgagaguucgagc.....             | 2    | 0 | seq |
| .gaggucgagaguucgGgcc.....            | 2    | 1 | seq |

Star

Mature

|                                 |                             |                         |                                  |     |  |  |
|---------------------------------|-----------------------------|-------------------------|----------------------------------|-----|--|--|
| uaccuuuuuuuuuugaggaaccugagguccg | agaguucgagccucuucac         | cccauuuacauuuuuuugaggaa | uccugaggucgagaguucgagccucucucacc |     |  |  |
| .....                           | gaggucgagaguucgGgccucu..... | 2                       | 1                                | seq |  |  |
| .....                           | .aggucgagaguucgagcc.....    | 2                       | 0                                | seq |  |  |
| .....                           | .aggucgagaguucgUgccucu..... | 2                       | 1                                | seq |  |  |
| .....                           | .aggucgagaguucgGgccucucuc.. | 1                       | 1                                | seq |  |  |
| .....                           | .ggucgagaguucgGgcc.....     | 4                       | 1                                | seq |  |  |
| .....                           | .ggucgagaguucgagccucu.....  | 2                       | 0                                | seq |  |  |
| .....                           | .ggucgagaguucgGgccucucu.... | 1                       | 1                                | seq |  |  |
| .....                           | .gucgagaguucgUgccu.....     | 2                       | 1                                | seq |  |  |
| .....                           | .gucgagaguucgGgccu.....     | 2                       | 1                                | seq |  |  |
| .....                           | .gucgagaguucgGgccuc.....    | 2                       | 1                                | seq |  |  |
| .....                           | .gucgagaguucgagccucC.....   | 2                       | 1                                | seq |  |  |
| .....                           | .gucgagaguucgagccucu.....   | 2                       | 0                                | seq |  |  |
| .....                           | .gaguucgGgccucucuca..       | 1                       | 1                                | seq |  |  |
| .....                           | .aguucgagccucucucac.        | 1                       | 0                                | seq |  |  |

Provisional ID : MA\_30446\_18930  
 Score total : 254.8  
 Score for star read(s) : 3.9  
 Score for read counts : 247.4  
 Score for mfe : 1.9  
 Score for randfold : 1.6  
 Score for cons. seed :  
 Total read count : 497  
 Mature read count : 492  
 Loop read count : 0  
 Star read count : 5

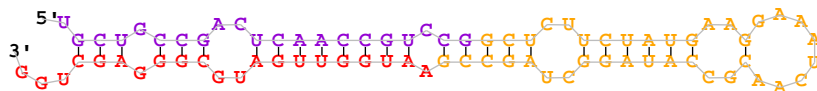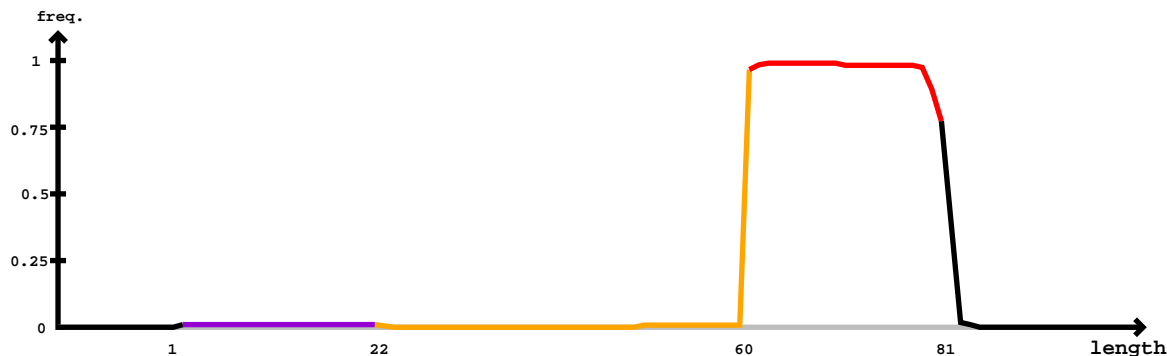

## Star

## Mature

| 5' -                                                                                                              | -3' | obs | exp | reads | mm | sample |
|-------------------------------------------------------------------------------------------------------------------|-----|-----|-----|-------|----|--------|
| gaaguuagaucugcugccgacucaaccgucggcucucuaugaaggaaaucaacgccauaggcuagccgaagguugaugcgggagcuggcuucucuaugauguacccu       |     |     |     |       |    |        |
| gaaguuagaucugcugccgacucaaccgucggcucucuaugaaggaaaucaacgccauaggcuagccgaagguugaugcgggagcuggcuucucuaugauguacccu       |     |     |     |       |    |        |
| ((((((((((((((((((((((((((((((((((((((((((((((((((((((((((((((((((((((((((((((((((((((((((((((((((((((((((((((((( |     |     |     |       |    |        |
| .....ugcugccgacucaaccgucgg.....                                                                                   |     |     |     | 1     | 0  | seq    |
| .....ugcugccgacucaCccgucgg.....                                                                                   |     |     |     | 4     | 1  | seq    |
| .....uaggcuagccgaagguugau.....                                                                                    |     |     |     | 4     | 0  | seq    |
| .....aaugguugaugcgggagc.....                                                                                      |     |     |     | 3     | 0  | seq    |
| .....aaugguAgaugcgggagc.....                                                                                      |     |     |     | 1     | 1  | seq    |
| .....aaugguugaugcGAgagcu.....                                                                                     |     |     |     | 1     | 1  | seq    |
| .....aaugCuugaugcgggagcu.....                                                                                     |     |     |     | 1     | 1  | seq    |
| .....aaugguugaugcgggagcu.....                                                                                     |     |     |     | 29    | 0  | seq    |
| .....aaugguugaugcgggagcA.....                                                                                     |     |     |     | 2     | 1  | seq    |
| .....aaugguugaugcgggagcC.....                                                                                     |     |     |     | 3     | 1  | seq    |
| .....aaugguugaugcgggagcuA.....                                                                                    |     |     |     | 3     | 1  | seq    |
| .....aaugguugaugcgggagcuU.....                                                                                    |     |     |     | 3     | 1  | seq    |
| .....aaugguugaugcgggagcGg.....                                                                                    |     |     |     | 1     | 1  | seq    |
| .....aaugguugaugcgggagcug.....                                                                                    |     |     |     | 48    | 0  | seq    |
| .....aaugguugaugcgggagcuAg.....                                                                                   |     |     |     | 3     | 1  | seq    |
| .....aaugguugaugcgggagcGgg.....                                                                                   |     |     |     | 1     | 1  | seq    |
| .....aaugguugaugcgggagcuUg.....                                                                                   |     |     |     | 1     | 1  | seq    |
| .....aaugguugaugcgggagcugC.....                                                                                   |     |     |     | 2     | 1  | seq    |
| .....aaugguugaugcgggGgcugg.....                                                                                   |     |     |     | 3     | 1  | seq    |
| .....Gaugguugaugcgggagcugg.....                                                                                   |     |     |     | 5     | 1  | seq    |
| .....aaugguugaugcAggagcugg.....                                                                                   |     |     |     | 1     | 1  | seq    |
| .....aaugguugaugcgggagcugU.....                                                                                   |     |     |     | 2     | 1  | seq    |
| .....aaugguugaugUgggagcugg.....                                                                                   |     |     |     | 1     | 1  | seq    |
| .....aaUguugaugcgggagcugg.....                                                                                    |     |     |     | 1     | 1  | seq    |
| .....aaugguugGugcgggagcugg.....                                                                                   |     |     |     | 1     | 1  | seq    |
| .....aGugguugaugcgggagcugg.....                                                                                   |     |     |     | 1     | 1  | seq    |
| .....aaugguugaugcgggagcugg.....                                                                                   |     |     |     | 313   | 0  | seq    |
| .....aaugguugaugcgggagcugA.....                                                                                   |     |     |     | 27    | 1  | seq    |
| .....Naugguugaugcgggagcugg.....                                                                                   |     |     |     | 1     | 1  | seq    |
| .....aaugguugaCgcgggagcugg.....                                                                                   |     |     |     | 1     | 1  | seq    |
| .....aaugguugaugcgggagcuggc.....                                                                                  |     |     |     | 7     | 0  | seq    |
| .....aaugguugaugcgggagcuggA.....                                                                                  |     |     |     | 5     | 1  | seq    |
| .....aaugguugaugcgggagcuggAu.....                                                                                 |     |     |     | 3     | 1  | seq    |

## Star

## Mature

gaaguuagaucugcugccgacucaaccguccggcucuucuaugaaggaaaucaacgccauaggcuagccgaaugguugaugcgggagcuggcuucuucuacauguuacccu

|                                     |   |   |     |
|-------------------------------------|---|---|-----|
| .....aaugguuugaugcgggagcuggcu.....  | 1 | 0 | seq |
| .....aaugguuugaugcgggagcuggcuC..... | 2 | 1 | seq |
| .....aaugguuugaugcgggagcuggAuu..... | 3 | 1 | seq |
| .....augguuugaugcgggagcu.....       | 4 | 0 | seq |
| .....augguuugaugcgggagcug.....      | 4 | 0 | seq |
| .....augguuugaugcgggagcugg.....     | 1 | 0 | seq |
| .....ugguuugaugcgggagcu.....        | 1 | 0 | seq |
| .....ugguuugaugcgggagcug.....       | 1 | 0 | seq |
| .....ugguuugaugcgggagcugg.....      | 1 | 0 | seq |



Provisional ID : MA\_31348\_15133  
Score total : 37847.5  
Score for star read(s) : 3.9  
Score for read counts : 37845.5  
Score for mfe : 0.4  
Score for randfold : -2.2  
Score for cons. seed :  
Total read count : 74244  
Mature read count : 74243  
Loop read count : 0  
Star read count : 1

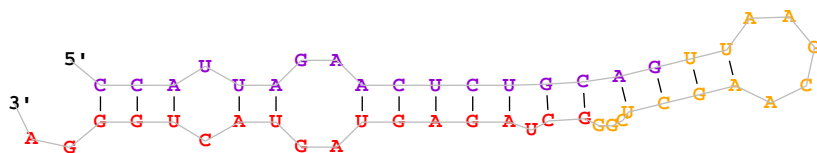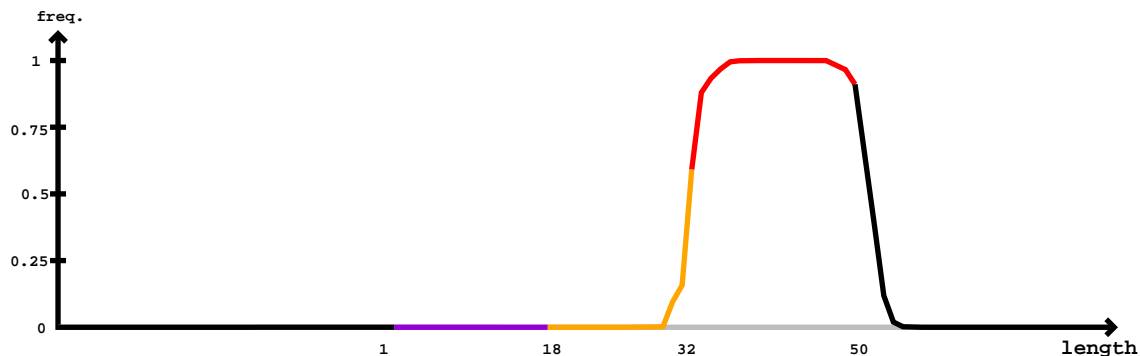

Star

Mature

| 5' -                                                                      | obs | exp | reads | mm | sample |
|---------------------------------------------------------------------------|-----|-----|-------|----|--------|
| caugccuacaacauagcguaaauugcaucgggauc                                       | 1   | 0   | seq   |    |        |
| caugccuacaacauagcguaaauugcaucgggauc                                       | 1   | 0   | seq   |    |        |
| .((((.....)))).....((((.....((((.....)))).....)))).....((((.....))))..... | 1   | 0   | seq   |    |        |
| .....agcguaaauugcaucgggauc                                                | 1   | 0   | seq   |    |        |
| .....cguaaauugcaucgggauc                                                  | 1   | 0   | seq   |    |        |
| .....guuaaauugcaucgggauc                                                  | 2   | 0   | seq   |    |        |
| .....uaugcaucgggauc                                                       | 1   | 0   | seq   |    |        |
| .....cggauc                                                               | 1   | 0   | seq   |    |        |
| .....cggauc                                                               | 1   | 0   | seq   |    |        |
| .....ccauuagaacucugcag                                                    | 1   | 0   | seq   |    |        |
| .....agaacucugcaguaagc                                                    | 1   | 0   | seq   |    |        |
| .....gcucgggcuagaguagu                                                    | 1   | 0   | seq   |    |        |
| .....gcucgggcuagaguaguacG                                                 | 1   | 1   | seq   |    |        |
| .....gcucgggcuagaguaguacC                                                 | 2   | 1   | seq   |    |        |
| .....gcucgggcuagaguaguacu                                                 | 2   | 1   | seq   |    |        |
| .....gcucgggcuagaguaguacug                                                | 1   | 1   | seq   |    |        |
| .....gcucgggcuagaguaguacug                                                | 1   | 0   | seq   |    |        |
| .....gcucgggcuagaguaguacugg                                               | 1   | 0   | seq   |    |        |
| .....gcucgggcuagaguaguacuggg                                              | 1   | 1   | seq   |    |        |
| .....gcucgggcuagaguaguacuggga                                             | 10  | 0   | seq   |    |        |
| .....gcucgggcuagaguaguacugggaug                                           | 2   | 1   | seq   |    |        |
| .....gcucgggcuagaguaguacugggaug                                           | 7   | 0   | seq   |    |        |
| .....gcucgggcuagaguaguacugggaug                                           | 1   | 1   | seq   |    |        |
| .....gcucgggcuagaguaguacugggaug                                           | 1   | 1   | seq   |    |        |
| .....gcucgggcuagaguaguacugggaug                                           | 1   | 0   | seq   |    |        |
| .....cucgggcuagaguaguacug                                                 | 2   | 0   | seq   |    |        |
| .....cucgggcuagaguaguacug                                                 | 2   | 0   | seq   |    |        |
| .....cucgggcuagaguaguacug                                                 | 2   | 0   | seq   |    |        |
| .....cucgggcuagaguaguacug                                                 | 3   | 0   | seq   |    |        |
| .....cucgggcuagaguaguacug                                                 | 12  | 0   | seq   |    |        |
| .....cucgggcuagaguaguacug                                                 | 2   | 0   | seq   |    |        |
| .....cucgggcuagaguaguacug                                                 | 9   | 0   | seq   |    |        |
| .....cucgggcuagaguaguacug                                                 | 4   | 0   | seq   |    |        |
| .....ucgggcuagaguaguacug                                                  | 2   | 0   | seq   |    |        |
| .....ucgggcuagaguaguacug                                                  | 4   | 0   | seq   |    |        |

## Star

## Mature

caugccuacaacauagcguuaaugcaucggaucccauuagaacucugcaguuagcaagcucgggcuagaguaguacuugggauggaugauugcucgggaaguccgagu

|                                        |      |   |     |
|----------------------------------------|------|---|-----|
| .....ucggggcuagaguaguacuugggaUA.....   | 1    | 1 | seq |
| .....ucggggcuagaguaguacuugggaug.....   | 1    | 0 | seq |
| .....uAgggcuagaguaguacuugggaugga.....  | 1    | 1 | seq |
| .....Ngggcuagaguaguacu.....            | 2    | 1 | seq |
| .....cggggcuagaguaguacu.....           | 10   | 0 | seq |
| .....cggggcuCgaguaguacu.....           | 1    | 1 | seq |
| .....Ngggcuagaguaguacuug.....          | 5    | 1 | seq |
| .....cggggcuagaguaguacuug.....         | 7    | 0 | seq |
| .....cggggcuagaguaguacuugg.....        | 3    | 0 | seq |
| .....Ngggcuagaguaguacuugg.....         | 2    | 1 | seq |
| .....cggggcuagaguaguacuuggg.....       | 2    | 0 | seq |
| .....cCgggcuaagaguaguacuuggg.....      | 1    | 1 | seq |
| .....Ngggcuagaguaguacuuggg.....        | 1    | 1 | seq |
| .....cggggcuagaguaguacuugUg.....       | 1    | 1 | seq |
| .....cggggcuagaguaguacuuggga.....      | 11   | 0 | seq |
| .....Ngggcuagaguaguacuuggga.....       | 8    | 1 | seq |
| .....Ngggcuagaguaguacuugggau.....      | 4    | 1 | seq |
| .....Ngggcuagaguaguacuugggaug.....     | 7    | 1 | seq |
| .....cggggcuagaguaguacuugggaug.....    | 6    | 0 | seq |
| .....cggggcuagaguaguUcugggaug.....     | 1    | 1 | seq |
| .....cggggcuagaguaguacuugggaugg.....   | 4    | 0 | seq |
| .....cggggcuagaguGguacuugggaugg.....   | 1    | 1 | seq |
| .....Ngggcuagaguaguacuugggaugg.....    | 1    | 1 | seq |
| .....cggggcuagaguaguacuugggaugga.....  | 1    | 0 | seq |
| .....ggggcuagaguaguagUG.....           | 1    | 1 | seq |
| .....ggggcuagaguaguacuug.....          | 1243 | 0 | seq |
| .....Nggcuagaguaguacuug.....           | 1    | 1 | seq |
| .....ggggcuCgaguaguacuug.....          | 1    | 1 | seq |
| .....ggggcuagaguaguacuugg.....         | 1035 | 0 | seq |
| .....Nggcuagaguaguacuugg.....          | 2    | 1 | seq |
| .....ggggcuagaguaguagUGgg.....         | 1    | 1 | seq |
| .....ggggcuagaguaguacuuggg.....        | 394  | 0 | seq |
| .....ggggcuagaguaguacuuggga.....       | 1764 | 0 | seq |
| .....Cggcuagaguaguacuuggga.....        | 1    | 1 | seq |
| .....Nggcuagaguaguacuuggga.....        | 1    | 1 | seq |
| .....ggggcuagaguaguacuugggC.....       | 4    | 1 | seq |
| .....ggCcuagaguaguacuuggga.....        | 1    | 1 | seq |
| .....ggggcuagaguaguacuugggCu.....      | 2    | 1 | seq |
| .....ggggcuagaguaguacuugggau.....      | 654  | 0 | seq |
| .....ggggcuagaguaguacuugggaG.....      | 15   | 1 | seq |
| .....ggggcuagaguaguacuugggaGg.....     | 2    | 1 | seq |
| .....Cggcuagaguaguacuugggaug.....      | 2    | 1 | seq |
| .....ggggcuagaguCguacuugggaug.....     | 1    | 1 | seq |
| .....ggggcuagaguaguacuugggaug.....     | 1370 | 0 | seq |
| .....ggggcGagaguaguacuugggaug.....     | 1    | 1 | seq |
| .....ggggcuagaguaguacuugggaugg.....    | 335  | 0 | seq |
| .....ggggcuagaguaguacuugggGuugga.....  | 1    | 1 | seq |
| .....Cggcuagaguaguacuugggaugga.....    | 1    | 1 | seq |
| .....ggggcuagaguGguacuugggaugga.....   | 1    | 1 | seq |
| .....ggggcuagaguaguacuugggaugga.....   | 64   | 0 | seq |
| .....ggggcuagGguaguacuugggaugga.....   | 3    | 1 | seq |
| .....ggggcuagaguaguacuugAgauugga.....  | 1    | 1 | seq |
| .....ggggcuagaguaguagUGggauugga.....   | 1    | 1 | seq |
| .....ggggcCagaguaguacuugggaugga.....   | 10   | 1 | seq |
| .....ggggcuagaguaguacuugggauggau.....  | 1    | 0 | seq |
| .....ggggcuagaguaguacuugggaugCau.....  | 1    | 1 | seq |
| .....ggggcuagaguaguacuugggauggaug..... | 1    | 0 | seq |
| .....ggcuagaguaguacuugg.....           | 198  | 0 | seq |
| .....ggcuagaguaguacuuggg.....          | 307  | 0 | seq |
| .....ggcuagaguCguacuuggga.....         | 1    | 1 | seq |
| .....Ngcuagaguaguacuuggga.....         | 2    | 1 | seq |
| .....ggcuagaguaguacuuggga.....         | 1632 | 0 | seq |
| .....ggcuagaguaguacuugggau.....        | 759  | 0 | seq |
| .....ggcuagaguaguagUGgggau.....        | 1    | 1 | seq |
| .....ggcuagaguaguacuugggaug.....       | 1421 | 0 | seq |
| .....Ngcuagaguaguacuugggaug.....       | 2    | 1 | seq |
| .....ggcuagaguaguacuugggaugg.....      | 330  | 0 | seq |
| .....Ngcuagaguaguacuugggaugg.....      | 1    | 1 | seq |
| .....ggcuagaguaguagUGgggaugg.....      | 1    | 1 | seq |
| .....ggcuagaguaguacuugggauAga.....     | 1    | 1 | seq |

## Star

## Mature

caugccuacaacauagcguuaaagcaucggaucccauuagaacucugcaguuagcaagcucggggcuagaguaguacuggggauggaugauugcucgggaaguccgagu

|                                       |       |   |     |
|---------------------------------------|-------|---|-----|
| .....ggcuagaguaguacuggggaugCa.....    | 1     | 1 | seq |
| .....ggcuagaguaguGcuggggaugga.....    | 1     | 1 | seq |
| .....ggcCagaguaguacuggggaugga.....    | 1     | 1 | seq |
| .....ggcuagagCaguacuggggaugga.....    | 1     | 1 | seq |
| .....ggcuagaguaAuacuggggaugga.....    | 1     | 1 | seq |
| .....gAcuagaguaguacuggggaugga.....    | 1     | 1 | seq |
| .....ggcuagaguaguacuggggaugga.....    | 35    | 0 | seq |
| .....ggcuagaguaguacuggggaGgga.....    | 1     | 1 | seq |
| .....ggcuagaguaguacuggggauggau.....   | 2     | 0 | seq |
| .....ggcuagaguaguacuggggauggaug.....  | 1     | 0 | seq |
| .....Ncuagaguaguacuggg.....           | 2     | 1 | seq |
| .....gcuCgaguaguacuggg.....           | 1     | 1 | seq |
| .....gcuagaguaguagGuggg.....          | 1     | 1 | seq |
| .....gcuagaguaguacuggg.....           | 3399  | 0 | seq |
| .....gcuCgaguaguacugggga.....         | 2     | 1 | seq |
| .....gcuagaguaguacugggga.....         | 15937 | 0 | seq |
| .....gcuagaguaguagGugggga.....        | 3     | 1 | seq |
| .....Ncuagaguaguacugggga.....         | 24    | 1 | seq |
| .....gcuagaguCguacugggga.....         | 3     | 1 | seq |
| .....gNuagaguaguacugggga.....         | 2     | 1 | seq |
| .....Ncuagaguaguacuggggau.....        | 7     | 1 | seq |
| .....gcuagaguaguacuggggau.....        | 3648  | 0 | seq |
| .....Ncuagaguaguacuggggaug.....       | 8     | 1 | seq |
| .....gcuagaguCguacuggggaug.....       | 1     | 1 | seq |
| .....gcuagaguaguacuggggaug.....       | 7467  | 0 | seq |
| .....gNuagaguaguacuggggaug.....       | 2     | 1 | seq |
| .....Ncuagaguaguacuggggauggg.....     | 1     | 1 | seq |
| .....gcuagaguaguacuggggauggg.....     | 1676  | 0 | seq |
| .....gcuagGguaguacuggggaugggga.....   | 6     | 1 | seq |
| .....gcuagaguaguacuggggaugCa.....     | 1     | 1 | seq |
| .....gcuagaguaguacuggggaugga.....     | 97    | 0 | seq |
| .....gcuagaguaguacugggGugggga.....    | 1     | 1 | seq |
| .....gcuagaguGguacuggggaugggga.....   | 1     | 1 | seq |
| .....gcuagaguaguGcuggggaugggga.....   | 1     | 1 | seq |
| .....gcuGgaguaguacuggggaugggga.....   | 1     | 1 | seq |
| .....gcCagaguaguacuggggaugggga.....   | 1     | 1 | seq |
| .....gUuagaguaguacuggggaugggga.....   | 1     | 1 | seq |
| .....gcuagaguaguacuggggaCgga.....     | 2     | 1 | seq |
| .....gcuagaguaguacuggggauggaG.....    | 1     | 1 | seq |
| .....gcuagGguaguacuggggaugggau.....   | 1     | 1 | seq |
| .....gcuagaguaguacuggggaugggau.....   | 1     | 0 | seq |
| .....gcuagaguaguacuggggaugggauug..... | 3     | 0 | seq |
| .....gcuagaguaguacuggggaugCaug.....   | 1     | 1 | seq |
| .....cuagaguCguacugggga.....          | 1     | 1 | seq |
| .....cuagaguaguacugggga.....          | 11182 | 0 | seq |
| .....Nuagaguaguacugggga.....          | 17    | 1 | seq |
| .....Nuagaguaguacuggggau.....         | 1     | 1 | seq |
| .....cuagaguaguacuggggau.....         | 1705  | 0 | seq |
| .....cuagaguCguacuggggaug.....        | 2     | 1 | seq |
| .....Nuagaguaguacuggggaug.....        | 14    | 1 | seq |
| .....cuagaguaguacuggggaug.....        | 5911  | 0 | seq |
| .....cuCgaguaguacuggggaug.....        | 1     | 1 | seq |
| .....Nuagaguaguacuggggaugg.....       | 2     | 1 | seq |
| .....cuagaguaguacuggggaugg.....       | 2280  | 0 | seq |
| .....cuCgaguaguacuggggaugg.....       | 1     | 1 | seq |
| .....cuagaguaguacuggggaugga.....      | 286   | 0 | seq |
| .....cuagGguaguacuggggaugggga.....    | 23    | 1 | seq |
| .....cCagaguaguacuggggaugggga.....    | 2     | 1 | seq |
| .....cuagaguaguacuggggaGggga.....     | 5     | 1 | seq |
| .....cuagaguaguacuggggaCggga.....     | 1     | 1 | seq |
| .....cuagaguGguacuggggaugggga.....    | 2     | 1 | seq |
| .....cuagaguaguacugggGugggga.....     | 1     | 1 | seq |
| .....cuagagCaguacuggggaugggga.....    | 1     | 1 | seq |
| .....cuagaguaguacuggggaugggau.....    | 7     | 0 | seq |
| .....cuagGguaguacuggggaugggau.....    | 1     | 1 | seq |
| .....cuGgaguaguacuggggaugggau.....    | 1     | 1 | seq |
| .....cuagGguaguacuggggaugggauug.....  | 1     | 1 | seq |
| .....cuagaguaguacugggAuugggau.....    | 1     | 1 | seq |
| .....cuagaguaguacuggggaugggauC.....   | 1     | 1 | seq |
| .....cuagaguaguacuggggaugggauug.....  | 5     | 0 | seq |

## Star

## Mature

caugccuacaacauagcguuaaugcaucgggaucccauuagaacucugcaguuagcaagcucgggcuagaguaguacuggggauggaugauugcucgggaaguccgagu

|                                                               |      |   |     |
|---------------------------------------------------------------|------|---|-----|
| .....cuagag <u>uag</u> uac <u>u</u> g <u>ggga</u> uggaGg..... | 1    | 1 | seq |
| .....uagag <u>uag</u> uac <u>u</u> g <u>ggga</u> u.....       | 1470 | 0 | seq |
| .....Nagag <u>uag</u> uac <u>u</u> g <u>ggga</u> u.....       | 2    | 1 | seq |
| .....uCgag <u>uag</u> uac <u>u</u> g <u>ggga</u> u.....       | 1    | 1 | seq |
| .....uagag <u>uag</u> uac <u>u</u> g <u>ggga</u> ug.....      | 1889 | 0 | seq |
| .....uCgag <u>uag</u> uac <u>u</u> g <u>ggga</u> ug.....      | 1    | 1 | seq |
| .....uagaguCguac <u>u</u> g <u>ggga</u> ug.....               | 1    | 1 | seq |
| .....Nagag <u>uag</u> uac <u>u</u> g <u>ggga</u> ug.....      | 1    | 1 | seq |
| .....uagag <u>uag</u> uac <u>u</u> g <u>ggga</u> ugg.....     | 523  | 0 | seq |
| .....uagag <u>uag</u> uac <u>u</u> g <u>ggga</u> Uaugga.....  | 1    | 1 | seq |
| .....uGgag <u>uag</u> uac <u>u</u> g <u>ggga</u> ugga.....    | 1    | 1 | seq |
| .....uagag <u>uag</u> uac <u>u</u> g <u>ggga</u> ugga.....    | 69   | 0 | seq |
| .....uagag <u>uag</u> uac <u>u</u> g <u>ggga</u> ugCa.....    | 2    | 1 | seq |
| .....uagGguag <u>uag</u> uac <u>u</u> g <u>ggga</u> ugga..... | 8    | 1 | seq |
| .....Cagag <u>uag</u> uac <u>u</u> g <u>ggga</u> ugga.....    | 1    | 1 | seq |
| .....uagag <u>uag</u> uac <u>u</u> g <u>ggga</u> Cgga.....    | 1    | 1 | seq |
| .....uagag <u>uag</u> uac <u>u</u> g <u>ggga</u> ugga.....    | 1    | 1 | seq |
| .....uaUag <u>uag</u> uac <u>u</u> g <u>ggga</u> ugga.....    | 1    | 1 | seq |
| .....uagag <u>uag</u> uac <u>u</u> gAgaugga.....              | 1    | 1 | seq |
| .....uagag <u>uag</u> uac <u>u</u> g <u>ggga</u> uggau.....   | 3    | 0 | seq |
| .....uagag <u>uag</u> uac <u>u</u> g <u>ggga</u> uggaug.....  | 3    | 0 | seq |
| .....uagag <u>uag</u> uac <u>u</u> g <u>ggga</u> uggauA.....  | 1    | 1 | seq |
| .....Ngag <u>uag</u> uac <u>u</u> g <u>ggga</u> ug.....       | 3    | 1 | seq |
| .....Cgag <u>uag</u> uac <u>u</u> g <u>ggga</u> ug.....       | 3    | 1 | seq |
| .....agag <u>uag</u> uac <u>u</u> g <u>ggga</u> ug.....       | 1946 | 0 | seq |
| .....agag <u>uag</u> uac <u>u</u> g <u>ggga</u> ugg.....      | 545  | 0 | seq |
| .....agaguaUuac <u>u</u> g <u>ggga</u> ugga.....              | 1    | 1 | seq |
| .....agag <u>uag</u> uac <u>u</u> g <u>ggga</u> Ggga.....     | 3    | 1 | seq |
| .....agag <u>uag</u> uac <u>u</u> g <u>ggga</u> Cgga.....     | 2    | 1 | seq |
| .....Ggag <u>uag</u> uac <u>u</u> g <u>ggga</u> ugga.....     | 1    | 1 | seq |
| .....agag <u>uag</u> uac <u>u</u> g <u>ggga</u> ugga.....     | 97   | 0 | seq |
| .....agGguag <u>uag</u> uac <u>u</u> g <u>ggga</u> ugga.....  | 3    | 1 | seq |
| .....agag <u>uag</u> uac <u>u</u> g <u>ggga</u> uggau.....    | 3    | 0 | seq |
| .....Naguag <u>uag</u> uac <u>u</u> g <u>ggga</u> ugg.....    | 4    | 1 | seq |
| .....gag <u>uag</u> uac <u>u</u> g <u>ggga</u> ugg.....       | 1687 | 0 | seq |
| .....Naguag <u>uag</u> uac <u>u</u> g <u>ggga</u> ugga.....   | 1    | 1 | seq |
| .....gag <u>uag</u> uac <u>u</u> g <u>ggga</u> ugga.....      | 266  | 0 | seq |
| .....gagAag <u>uag</u> uac <u>u</u> g <u>ggga</u> ugga.....   | 1    | 1 | seq |
| .....gaguag <u>uag</u> uac <u>u</u> g <u>ggga</u> Gugga.....  | 2    | 1 | seq |
| .....gGguag <u>uag</u> uac <u>u</u> g <u>ggga</u> ugga.....   | 7    | 1 | seq |
| .....gCguag <u>uag</u> uac <u>u</u> g <u>ggga</u> ugga.....   | 1    | 1 | seq |
| .....gaA <u>uag</u> uac <u>u</u> g <u>ggga</u> ugga.....      | 1    | 1 | seq |
| .....gagCaguac <u>u</u> g <u>ggga</u> ugga.....               | 2    | 1 | seq |
| .....gaguag <u>uag</u> uac <u>u</u> g <u>ggga</u> Cgga.....   | 3    | 1 | seq |
| .....gaguag <u>uag</u> uac <u>u</u> g <u>ggga</u> uggau.....  | 7    | 0 | seq |
| .....gGguag <u>uag</u> uac <u>u</u> g <u>ggga</u> uggau.....  | 1    | 1 | seq |
| .....gaguag <u>uag</u> uac <u>u</u> g <u>ggga</u> uggaC.....  | 3    | 1 | seq |
| .....gaguag <u>uag</u> uac <u>u</u> g <u>ggga</u> uggaA.....  | 1    | 1 | seq |
| .....gaguag <u>uag</u> uac <u>u</u> g <u>ggga</u> uggaug..... | 10   | 0 | seq |
| .....gaguag <u>uag</u> uac <u>u</u> g <u>ggga</u> uggaCg..... | 1    | 1 | seq |
| .....gaguag <u>uag</u> uac <u>u</u> g <u>ggga</u> uggauA..... | 1    | 1 | seq |
| .....aguag <u>uag</u> uac <u>u</u> g <u>ggga</u> Cgga.....    | 1    | 1 | seq |
| .....aguag <u>uag</u> uac <u>u</u> g <u>ggga</u> ugga.....    | 266  | 0 | seq |
| .....Uguag <u>uag</u> uac <u>u</u> g <u>ggga</u> ugga.....    | 1    | 1 | seq |
| .....aA <u>uag</u> uac <u>u</u> g <u>ggga</u> ugga.....       | 1    | 1 | seq |
| .....aguag <u>uag</u> uac <u>u</u> g <u>ggga</u> Ggga.....    | 3    | 1 | seq |
| .....aguag <u>uag</u> uac <u>u</u> g <u>ggga</u> Gugga.....   | 1    | 1 | seq |
| .....aguGguac <u>u</u> g <u>ggga</u> ugga.....                | 1    | 1 | seq |
| .....Gguag <u>uag</u> uac <u>u</u> g <u>ggga</u> ugga.....    | 5    | 1 | seq |
| .....agAag <u>uag</u> uac <u>u</u> g <u>ggga</u> ugga.....    | 2    | 1 | seq |
| .....aguag <u>uag</u> uac <u>u</u> g <u>ggga</u> uggaC.....   | 1    | 1 | seq |
| .....aguag <u>uag</u> uac <u>u</u> g <u>ggga</u> uggau.....   | 10   | 0 | seq |
| .....aguag <u>uag</u> uac <u>u</u> g <u>ggga</u> uggaG.....   | 1    | 1 | seq |
| .....aguUguac <u>u</u> g <u>ggga</u> uggau.....               | 1    | 1 | seq |
| .....aguag <u>uag</u> uac <u>u</u> g <u>ggga</u> uggaug.....  | 7    | 0 | seq |
| .....aguag <u>uag</u> uac <u>u</u> g <u>ggga</u> uggaCg.....  | 1    | 1 | seq |
| .....guag <u>uag</u> uac <u>u</u> g <u>ggga</u> uggau.....    | 11   | 0 | seq |
| .....guag <u>uag</u> uac <u>u</u> g <u>ggga</u> uggaC.....    | 3    | 1 | seq |
| .....guag <u>uag</u> uac <u>u</u> g <u>ggga</u> Cgga.....     | 3    | 1 | seq |
| .....guag <u>uag</u> uac <u>u</u> g <u>ggga</u> uggaCg.....   | 2    | 1 | seq |

Star

Mature

|                                   |                         |          |                  |          |           |                          |  |  |  |
|-----------------------------------|-------------------------|----------|------------------|----------|-----------|--------------------------|--|--|--|
| augccuacaacauagcguuaaugcaucgggauc | ccauuagaa               | cucugcag | uuagcaagcucgggcu | agaguagu | acugggaug | gaugauugcucgggaaguccgagu |  |  |  |
| .....                             | guaguacugggaugga        | Gg.....  | 1                | 1        | seq       |                          |  |  |  |
| .....                             | guaguacugggauggaug..... | 6        | 0                | seq      |           |                          |  |  |  |
| .....                             | Auaguacugggauggaug..... | 1        | 1                | seq      |           |                          |  |  |  |
| .....                             | uaguacugggauggauA.....  | 2        | 1                | seq      |           |                          |  |  |  |
| .....                             | uaguacugggauggaGg.....  | 1        | 1                | seq      |           |                          |  |  |  |
| .....                             | uaguacugggaugAgaug..... | 1        | 1                | seq      |           |                          |  |  |  |
| .....                             | uaguacugggauggaug.....  | 21       | 0                | seq      |           |                          |  |  |  |
| .....                             | aguacugggauggauga.....  | 1        | 0                | seq      |           |                          |  |  |  |

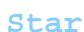[illegible]

## Mature

## Star

caucagcauagaugaaaauuccagucuaaagaacaaccugguguguguguaauuauugcauuagguucacaugucuccuggaaaaucauuuuccauuccaucugguugauuuu

|                                             |    |   |     |
|---------------------------------------------|----|---|-----|
| .....ccagucuaaagaacaaccugAuguggu.....       | 1  | 1 | seq |
| .....ccagucuaaagaacaaccugAuguggug.....      | 2  | 1 | seq |
| .....ccagucuaaagaacaaccugAuguggugu.....     | 1  | 1 | seq |
| .....ccagucuaaagaacaaccuggugugugua.....     | 1  | 0 | seq |
| .....ccagucuaaagaacaaccugAuguggugua.....    | 1  | 1 | seq |
| .....ccagucuaaagaacaaccugguguguguaCua.....  | 1  | 1 | seq |
| .....cagucuaagGacaaccug.....                | 1  | 1 | seq |
| .....cagucuaaagaacaaccug.....               | 1  | 0 | seq |
| .....Uagucuaaagaacaaccugg.....              | 1  | 1 | seq |
| .....cagucuaaagaacaaccuggu.....             | 1  | 0 | seq |
| .....cagucuaaagaacaaccuggug.....            | 3  | 0 | seq |
| .....cagucuaaagaacaaccuggugu.....           | 2  | 0 | seq |
| .....cagucuaagGacaaccuggugug.....           | 1  | 1 | seq |
| .....cagucuaaagaacaaccugAugug.....          | 11 | 1 | seq |
| .....cagucuaaagaacaaccugguguA.....          | 1  | 1 | seq |
| .....cagucuaaagaacaaccuggugugg.....         | 1  | 0 | seq |
| .....cagucuaaagaacaaccugAugugg.....         | 2  | 1 | seq |
| .....cagucuaaagaacaaccugAuguggu.....        | 1  | 1 | seq |
| .....cagucuaaagaacaaccugAuguggug.....       | 1  | 1 | seq |
| .....agucuaaagaacaaccug.....                | 1  | 0 | seq |
| .....agucuaaagaacaaccuggug.....             | 1  | 0 | seq |
| .....agucuaaagaacaaccugAug.....             | 1  | 1 | seq |
| .....agucuaaagaacaaccugAugug.....           | 4  | 1 | seq |
| .....agucuaaagaacaaccugAugugg.....          | 1  | 1 | seq |
| .....agucuaaagaacaaccuggugugugua.....       | 1  | 0 | seq |
| .....gucuaaagaacaaccugg.....                | 3  | 0 | seq |
| .....gucuaaagaacaaccugA.....                | 2  | 1 | seq |
| .....gucuaaagaacaaccugAu.....               | 1  | 1 | seq |
| .....gucuaaagaacaaccuggug.....              | 1  | 0 | seq |
| .....gucuaaagaacaaccugAug.....              | 7  | 1 | seq |
| .....gucuaaagaacaaccuggugu.....             | 1  | 0 | seq |
| .....gucuaaagaacaaccugAugug.....            | 9  | 1 | seq |
| .....gucuaaagaacaaccugAugugg.....           | 2  | 1 | seq |
| .....gucuaaagaacaaccugAuguggu.....          | 1  | 1 | seq |
| .....ucuaaagaacaaccuggu.....                | 1  | 0 | seq |
| .....ucuaaagaacaaccuggC.....                | 1  | 1 | seq |
| .....ucuaaagaacaaccugAug.....               | 5  | 1 | seq |
| .....ucuaaagaacaaccuggug.....               | 1  | 0 | seq |
| .....ucuaaagaacaaccugAugu.....              | 1  | 1 | seq |
| .....ucuaaagaacaaccugAugug.....             | 5  | 1 | seq |
| .....ucuaaagaacaaccuggugugg.....            | 1  | 0 | seq |
| .....ucuaaagaacaaccugAuguggu.....           | 1  | 1 | seq |
| .....cuaaagaacaaccugAug.....                | 10 | 1 | seq |
| .....cuaaagaacaaccuggug.....                | 2  | 0 | seq |
| .....cuaaagaacaaccugAugu.....               | 3  | 1 | seq |
| .....cuaaagaacaaccuggugu.....               | 2  | 0 | seq |
| .....cuaaagaacaaccuggugug.....              | 1  | 0 | seq |
| .....cuaaagaacaaccugAugug.....              | 14 | 1 | seq |
| .....cuaaagaacaaccuggugCg.....              | 1  | 1 | seq |
| .....cuaaagaacaaccuggugugg.....             | 1  | 0 | seq |
| .....cuaaagaacaaccugAugugg.....             | 6  | 1 | seq |
| .....cuaaagaacaaccugguguggu.....            | 2  | 0 | seq |
| .....cuaaagaacaaccugAuguggu.....            | 1  | 1 | seq |
| .....cuaaagaacaaccugguguguguaCu.....        | 1  | 1 | seq |
| .....cuaaagaacaaccugguguguguaCuaugcauu..... | 1  | 1 | seq |
| .....uaagaacaaccugAugug.....                | 7  | 1 | seq |
| .....uaagaacaaccugAugugg.....               | 2  | 1 | seq |
| .....uaagaacaaccugAuguggugu.....            | 1  | 1 | seq |
| .....aagaacaaccuggugug.....                 | 1  | 0 | seq |
| .....aagaacaaccugAugug.....                 | 7  | 1 | seq |
| .....aagaacaaccugAugugg.....                | 1  | 1 | seq |
| .....agaacaaccugAugugg.....                 | 5  | 1 | seq |
| .....agaacaaccugAuguggu.....                | 1  | 1 | seq |
| .....agaacaaccugguguggu.....                | 1  | 0 | seq |
| .....agaacaaccugAuguggug.....               | 1  | 1 | seq |
| .....gaacaaccugguguguggug.....              | 1  | 0 | seq |
| .....caaccugguguguguguaCu.....              | 1  | 1 | seq |
| .....caaccugguguguguguaCua.....             | 2  | 1 | seq |
| .....ugugguguaCuaugcauuagguuca.....         | 1  | 1 | seq |
| .....ugguguaCuaugcauuaggu.....              | 1  | 1 | seq |

Mature

Star

caucagcauagaugaauuuuccagucuaagaacaaccugguguguguaauuugcauuagguucacaugucuccuggaaaaucauuuccauuccaucugguugauuuu



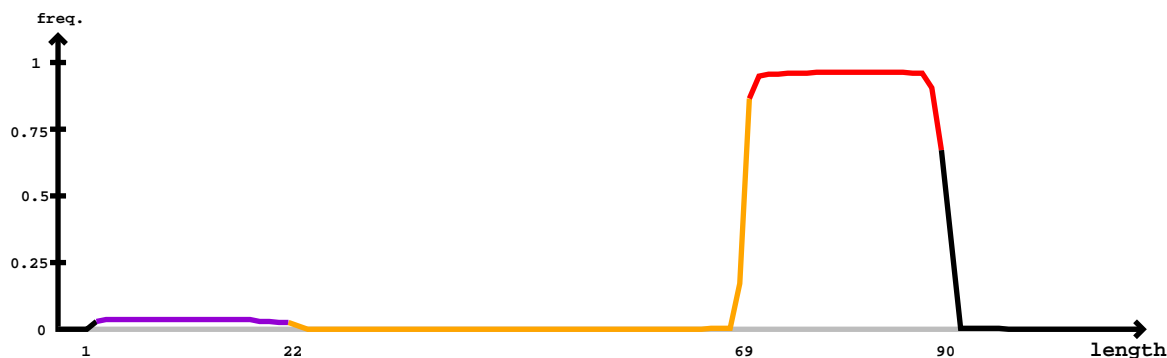

## Mature

Star

Mature

|                                                                                                                 |    |   |     |
|-----------------------------------------------------------------------------------------------------------------|----|---|-----|
| ccgggcucaccuuggaacauauucaccaucacauuaacaaacauauuucucugugagaugggaugauggacauguuuccaggucgccccggucggaaccucugcaugagca |    |   |     |
| .....cGuguuuccaggucgccccgg.....                                                                                 | 19 | 1 | seq |
| .....cauguuuccaggucgccccgC.....                                                                                 | 1  | 1 | seq |
| .....cGuguuuccaggucgccccggu.....                                                                                | 1  | 1 | seq |
| .....cauguuuccaggucgccccggA.....                                                                                | 1  | 1 | seq |
| .....cauguuuccaggucgccccggC.....                                                                                | 1  | 1 | seq |
| .....auguuccaggucgccccg.....                                                                                    | 1  | 0 | seq |
| .....auguuccaggucgccccU.....                                                                                    | 2  | 1 | seq |
| .....auguuccaggucgccccgA.....                                                                                   | 1  | 1 | seq |
| .....auguuccaggucgccccgg.....                                                                                   | 1  | 1 | seq |
| .....auguuccaggucgccccgC.....                                                                                   | 1  | 1 | seq |
| .....auguuccaggucgccccgg.....                                                                                   | 15 | 0 | seq |
| .....auguuccaggucgccccgg.....                                                                                   | 1  | 1 | seq |
| .....auguuccaggucgccccggC.....                                                                                  | 1  | 1 | seq |
| .....uguuuccaggucgcccU.....                                                                                     | 1  | 1 | seq |
| .....uguuuccaggucgccccAg.....                                                                                   | 1  | 1 | seq |
| .....uuccaggucgccccAg.....                                                                                      | 1  | 1 | seq |
| .....ccaggucgccccggucggaa.....                                                                                  | 1  | 0 | seq |

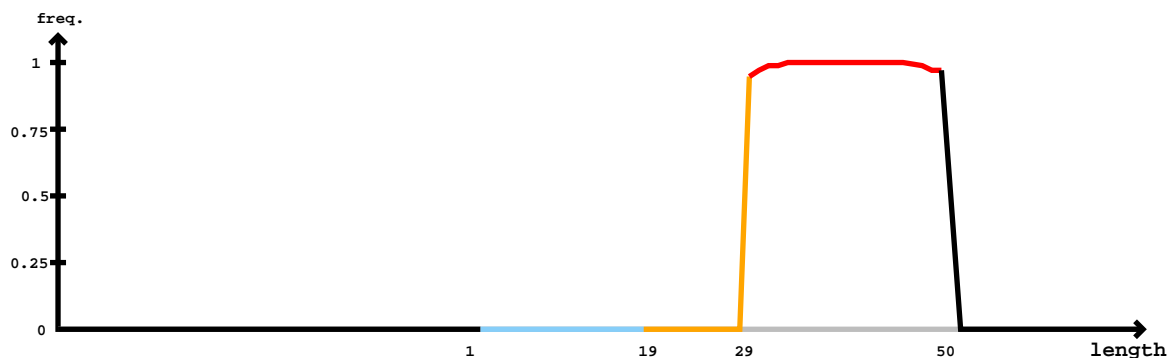

**Mature**

|     |                                                                                                                                                                                                                                                                                                                                                                                                                                                                                                                                                                                                                                                                                                          |         |
|-----|----------------------------------------------------------------------------------------------------------------------------------------------------------------------------------------------------------------------------------------------------------------------------------------------------------------------------------------------------------------------------------------------------------------------------------------------------------------------------------------------------------------------------------------------------------------------------------------------------------------------------------------------------------------------------------------------------------|---------|
| 5'- | guuucagauaaagggaacagaaaugggcuugauuuugcagcaggga <u>gcuauuuugcggaugauggaauuaa</u> aagcucaggagggaugagcgccgcugcaagacacgcccgua                                                                                                                                                                                                                                                                                                                                                                                                                                                                                                                                                                                | -3' exp |
|     | (((...(...).-.)).....(((.(.(((((((.(.(((((.(.(((...(((.)))..)).)..).)))))).)))))))).)).)...<br>.....aagcucaggagggauag.....reads mm sample<br>.....aagcucaggagggauagU.....1 1 seq<br>.....Gagcucaggagggaugagcgcc.....1 1 seq<br>.....aGgcucaggagggaugagcgcc.....1 1 seq<br>.....aagcucaggGgggaugagcgcc.....1 1 seq<br>.....aagcucaggagggaugagcgcc.....154 0 seq<br>.....aagcucaggaggAaugagcgcc.....1 1 seq<br>.....aagcucaggagggaugagcgCG.....1 1 seq<br>.....aagcucaggagggaugagcgccA.....1 1 seq<br>.....Ggcucaggagggaugagcgcc.....1 1 seq<br>.....agcucaggagggaugagcgcc.....3 0 seq<br>.....gcucaggagggaugagcg.....2 0 seq<br>.....gcucaggagggauGgcg.....1 1 seq<br>.....ucaggagggaugagcgcc.....2 0 seq |         |

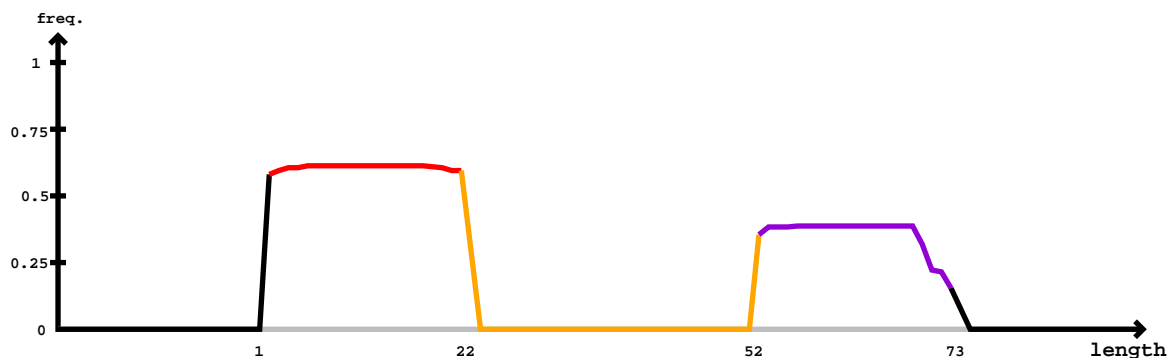

Star

[illegible]

**Mature**

**Star**

ugcggcgauggaauuuaaagcucagggagggaugcgcccgugcaagacacgcccguaucucaaguggcgcuauccauccugggcuucauaauuucuuuauaccauua

Provisional ID : MA\_32424\_17331  
Score total : 0.3  
Score for star read(s) : -1.3  
Score for read counts : 0  
Score for mfe : 0  
Score for randfold : 1.6  
Score for cons. seed :  
Total read count : 32  
Mature read count : 32  
Loop read count : 0  
Star read count : 0

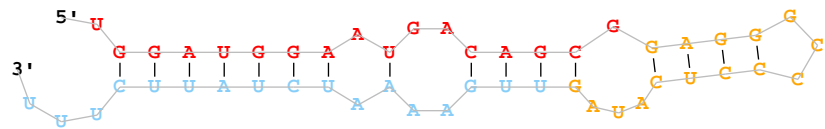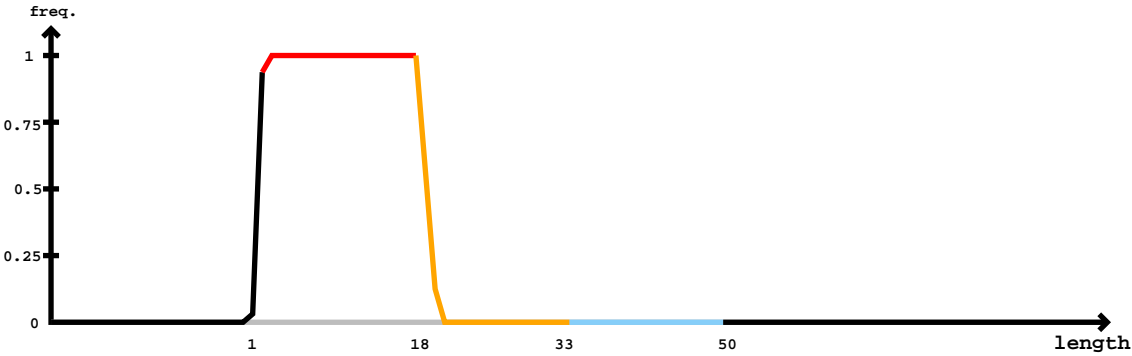

| Mature |                                                                                              | Star                                                  |       |     |        |  |
|--------|----------------------------------------------------------------------------------------------|-------------------------------------------------------|-------|-----|--------|--|
| 5'     | uccaacaacaauuuuccaguggauggaugacagcggaggggcccucaug                                            | uugaaaaucuaucuuuggauccaauggaauuuauugguucucccaugaguccg | -3'   | exp |        |  |
|        | .....(((((((.....(((((((.....)))))).....)))))).....)))).....(((((((.....)))))).....))))..... |                                                       | reads | mm  | sample |  |
|        | .....Uuggauggaugacagcgg.....                                                                 |                                                       | 1     | 1   | seq    |  |
|        | .....uggauggaugacagcg.....                                                                   |                                                       | 14    | 0   | seq    |  |
|        | .....uggauggaugacagcA.....                                                                   |                                                       | 4     | 1   | seq    |  |
|        | .....uggauggaugacagcgg.....                                                                  |                                                       | 7     | 0   | seq    |  |
|        | .....uggauggaugacagcGA.....                                                                  |                                                       | 1     | 1   | seq    |  |
|        | .....uggauggaugacagcggC.....                                                                 |                                                       | 3     | 1   | seq    |  |
|        | .....ggauggaugacagcgg.....                                                                   |                                                       | 2     | 0   | seq    |  |

[illegible]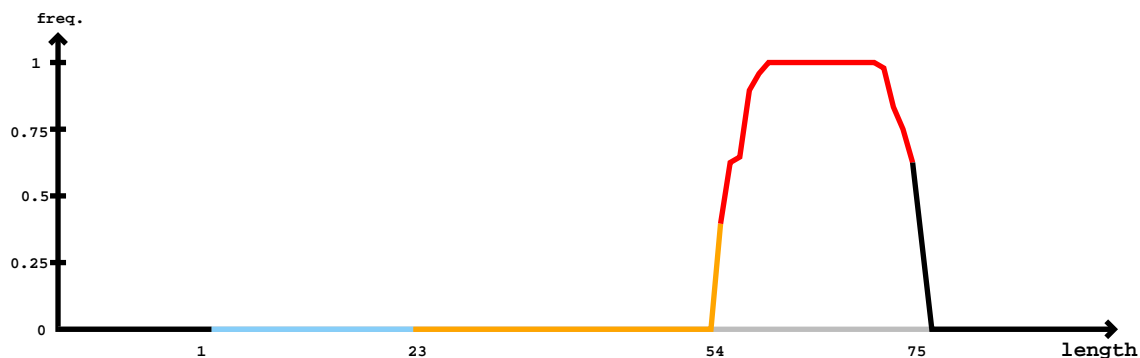

## Mature

[illegible]

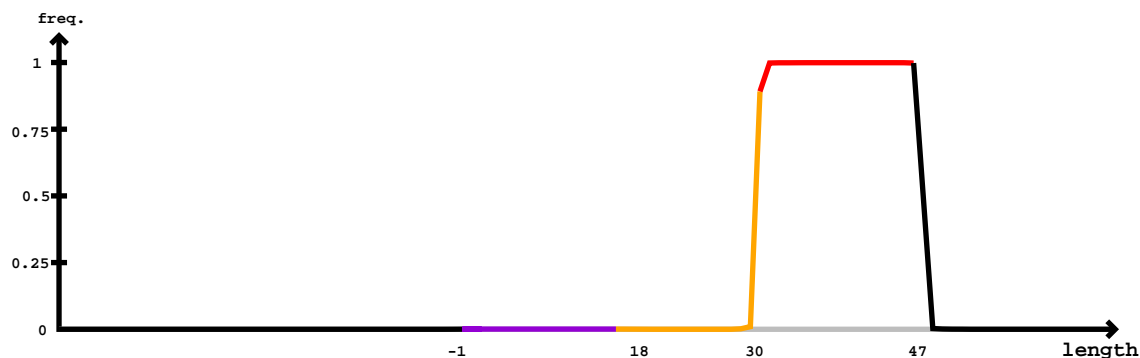

| 5' -                                                                                                                                | obs   |    |        |
|-------------------------------------------------------------------------------------------------------------------------------------|-------|----|--------|
|                                                                                                                                     | exp   |    |        |
| ggucuuaucaauuaauagaaauaauugugugcuaaaggguaugauccuauuaugugggccuuugagaauggguc <u>aaugauuaauaggggacu</u> auugaguucccuuccauccc           |       |    |        |
| ggucuuaucaauuaauagaaauaauugugugcuaaaggguaugau <u>auccuauuaugugggccuuugagaauggguc</u> <u>aaugauuaauaggggacu</u> auugaguucccuuccauccc |       |    |        |
| ((.....((((((.....((((.....))))).(((((((.....))))))))).)))))).....)).....                                                           |       |    |        |
| .....gauccuauuGuguugggcc.....                                                                                                       | reads | mm | sample |
| .....gauccuauuGuguugggcc.....                                                                                                       | 1     | 1  | seq    |
| .....auccuauuGuguugggccuu.....                                                                                                      | 1     | 1  | seq    |
| .....uccuauuaugugggccuu.....                                                                                                        | 1     | 0  | seq    |
| .....ccuauuGuguugggccuu.....                                                                                                        | 1     | 1  | seq    |
| .....ccuauuaugugggccuu.....                                                                                                         | 1     | 0  | seq    |
| .....Gcaaugauuaauagggga.....                                                                                                        | 1     | 1  | seq    |
| .....Gcaaugauuaauaggggacu.....                                                                                                      | 10    | 1  | seq    |
| .....ucaaugauuaauaggggacu.....                                                                                                      | 1     | 0  | seq    |
| .....caaugauuaauaggggac.....                                                                                                        | 3     | 0  | seq    |
| .....Gaaugauuaauaggggac.....                                                                                                        | 1     | 1  | seq    |
| .....Aaaugauuaauaggggac.....                                                                                                        | 2     | 1  | seq    |
| .....Naaugauuaauaggggac.....                                                                                                        | 2     | 1  | seq    |
| .....Gaaugauuaauaggggacu.....                                                                                                       | 11    | 1  | seq    |
| .....caaugauuaauaggggacu.....                                                                                                       | 11    | 0  | seq    |
| .....caaugauuaauaggggacC.....                                                                                                       | 1     | 1  | seq    |
| .....Aaaugauuaauaggggacu.....                                                                                                       | 3     | 1  | seq    |
| .....Naaugauuaauaggggacu.....                                                                                                       | 9     | 1  | seq    |
| .....Aaaugauuaauaggggacua.....                                                                                                      | 1     | 1  | seq    |
| .....caaugauuaauaggggacuG.....                                                                                                      | 11    | 1  | seq    |
| .....caaugauuaauaggggacuGu.....                                                                                                     | 3     | 1  | seq    |
| .....aaugauuaUuaggggacu.....                                                                                                        | 3     | 1  | seq    |
| .....aGugauuaauaggggacu.....                                                                                                        | 32    | 1  | seq    |
| .....aaugauuaCuaggggacu.....                                                                                                        | 1     | 1  | seq    |
| .....aaugauuaauUgggacu.....                                                                                                         | 1     | 1  | seq    |
| .....aaUauuaauaggggacu.....                                                                                                         | 2     | 1  | seq    |
| .....aaugauuaauaggggCcu.....                                                                                                        | 1     | 1  | seq    |
| .....Uaugauuaauaggggacu.....                                                                                                        | 6     | 1  | seq    |
| .....aaugauuaauaggggacC.....                                                                                                        | 817   | 1  | seq    |
| .....aUugauuaauaggggacu.....                                                                                                        | 1     | 1  | seq    |
| .....aaugGuuaauaggggacu.....                                                                                                        | 18    | 1  | seq    |
| .....aCugauuaauaggggacu.....                                                                                                        | 1     | 1  | seq    |
| .....aaAgaauuaauaggggacu.....                                                                                                       | 3     | 1  | seq    |
| .....Naugauuaauaggggacu.....                                                                                                        | 11    | 1  | seq    |



## Star

## Mature

|                                                                                         |                         |      |   |     |
|-----------------------------------------------------------------------------------------|-------------------------|------|---|-----|
| ggucuuaucaauuauagaaauaugugugcuaaggguaugauccuauuauuguuggccuuugagaauugggucaaugauuaauaggga | cuaauugaguucccuuccauccc |      |   |     |
| .....aaugaGuaauaggga                                                                    | cu.....                 | 1    | 1 | seq |
| .....aaugauuaauaggga                                                                    | cu.....                 | 4753 | 0 | seq |
| .....aaugauuaGuaggga                                                                    | cu.....                 | 21   | 1 | seq |
| .....Caugauuaauaggga                                                                    | cu.....                 | 3    | 1 | seq |
| .....aaugauuaauagUgacu                                                                  | cu.....                 | 3    | 1 | seq |
| .....aaugauuaaCaggga                                                                    | cu.....                 | 5    | 1 | seq |
| .....aaGgauuaauaggga                                                                    | cu.....                 | 3    | 1 | seq |
| .....aaugaCuaauaggga                                                                    | cu.....                 | 15   | 1 | seq |
| .....aaCgauuaauaggga                                                                    | cu.....                 | 7    | 1 | seq |
| .....aaugauuaauagggaCG                                                                  | cu.....                 | 169  | 1 | seq |
| .....aaugauuaauagggaAu                                                                  | cu.....                 | 2    | 1 | seq |
| .....aaugauuaauaggGUacu                                                                 | cu.....                 | 3    | 1 | seq |
| .....aaugauuaauCggga                                                                    | cu.....                 | 2    | 1 | seq |
| .....aaugauuaauagggaCA                                                                  | cu.....                 | 116  | 1 | seq |
| .....aaugauuaauagggGUcu                                                                 | cu.....                 | 2    | 1 | seq |
| .....aaugauuaauaggGCacu                                                                 | cu.....                 | 1    | 1 | seq |
| .....aaugauCaauaggga                                                                    | cu.....                 | 10   | 1 | seq |
| .....aaugauuaauagggaCu                                                                  | cu.....                 | 244  | 0 | seq |
| .....aaugauuaauagggaCCa                                                                 | cu.....                 | 2    | 1 | seq |
| .....aaugauuaauagggaCAa                                                                 | cu.....                 | 2    | 1 | seq |
| .....aaugauuaauaggggaCGa                                                                | cu.....                 | 2    | 1 | seq |
| .....aaugaCuaauagggaCu                                                                  | cu.....                 | 1    | 1 | seq |
| .....aaugGuuaauagggaCu                                                                  | cu.....                 | 1    | 1 | seq |
| .....aaugauuaauagggaCuC                                                                 | cu.....                 | 1    | 1 | seq |
| .....aaugauuaauagggaCuGu                                                                | cu.....                 | 1    | 1 | seq |
| .....aaugauuaauagggaCuauug                                                              | cu.....                 | 1    | 0 | seq |
| .....augauuaauagggaCCa                                                                  | cu.....                 | 8    | 1 | seq |
| .....augauuaauagggaCGa                                                                  | cu.....                 | 4    | 1 | seq |
| .....augauuaauagggaCu                                                                   | cu.....                 | 2    | 1 | seq |
| .....aCgauuaauagggaCu                                                                   | cu.....                 | 1    | 1 | seq |
| .....CugaauuaauagggaCu                                                                  | cu.....                 | 1    | 1 | seq |
| .....augaCuaauagggaCu                                                                   | cu.....                 | 1    | 1 | seq |
| .....augauuaauagggGCu                                                                   | cu.....                 | 3    | 1 | seq |
| .....GugaauuaauagggaCu                                                                  | cu.....                 | 3    | 1 | seq |
| .....augauuaauagggaCAa                                                                  | cu.....                 | 1    | 1 | seq |
| .....augauuaauCgggaCu                                                                   | cu.....                 | 1    | 1 | seq |
| .....augauuaauagggGUcu                                                                  | cu.....                 | 1    | 1 | seq |
| .....augauuaauagggaCu                                                                   | cu.....                 | 720  | 0 | seq |
| .....augauuaauagggaGua                                                                  | cu.....                 | 1    | 1 | seq |
| .....augauuaGuagggaCu                                                                   | cu.....                 | 1    | 1 | seq |
| .....augauuaauagUgacu                                                                   | cu.....                 | 1    | 1 | seq |
| .....UugaauuaauagggaCu                                                                  | cu.....                 | 2    | 1 | seq |
| .....augauuaauagggaCuau                                                                 | cu.....                 | 3    | 0 | seq |
| .....augauuaauagggaCuA                                                                  | cu.....                 | 1    | 1 | seq |
| .....augauuaauagggaCuC                                                                  | cu.....                 | 1    | 1 | seq |
| .....augauuaauagggaCuUuu                                                                | cu.....                 | 1    | 1 | seq |
| .....ugaauuaauagggaCuC                                                                  | cu.....                 | 1    | 1 | seq |
| .....ugaauuaauagggaCuau                                                                 | cu.....                 | 3    | 0 | seq |
| .....ugaauuaauagggaCuauG                                                                | cu.....                 | 1    | 1 | seq |
| .....ugaauuaauagggaCuauA                                                                | cu.....                 | 1    | 1 | seq |
| .....auuaauagggaCuauCGa                                                                 | cu.....                 | 1    | 1 | seq |
| .....uuaauagggaCuauCGa                                                                  | cu.....                 | 1    | 1 | seq |

5'U  
3'G

Secondary structure of the 5S rRNA gene from the bacterium 1221. The structure is shown as a complex fold with various stems and loops. Nucleotides are color-coded: purple for stems 1-4, orange for stems 5-8, and yellow for stems 9-12. The 5' end is labeled '5'U' and the 3' end is labeled '3'G'.

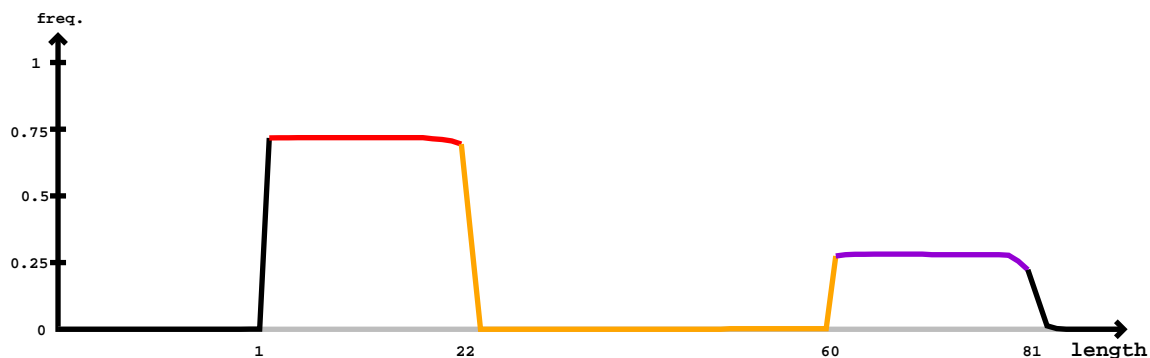

## Star

|     |                                                                                                                     | obs   |    |
|-----|---------------------------------------------------------------------------------------------------------------------|-------|----|
|     |                                                                                                                     | exp   |    |
| 5 - | ggcuuucaugaaguuagaucugcugccgacucauccgucgccggcucuuucuaaaaggaaaaucaacgccauaggcuagccgaauugguuugaugcgggagcugguuucuuucua | -3'   |    |
|     | ggcuuucaugaaguuagaucugcugccgacucauccgucgccggcucuuucuaaaaggaaaaucaacgccauaggcuagccgaauugguuugaugcgggagcugguuucuuucua |       |    |
|     | .....((((((((((((((((((((((((((((((((((((((((((.....)))))))))))))))))))))))))).....                                 | reads | mm |
|     | .....ucugcugccgacucauccgucg.....                                                                                    | 1     | 0  |
|     | .....ugcugccgacucauccA.....                                                                                         | 1     | 1  |
|     | .....ugcugccgacucauccg.....                                                                                         | 7     | 0  |
|     | .....ugcggccgacucauccgu.....                                                                                        | 1     | 1  |
|     | .....ugcugccgacucauccg.....                                                                                         | 3     | 0  |
|     | .....ugcugccgacucaucccgC.....                                                                                       | 1     | 1  |
|     | .....ugcugccgacucaucccguc.....                                                                                      | 10    | 0  |
|     | .....ugcugccgacucaucccgUc.....                                                                                      | 1     | 1  |
|     | .....ugcugccgUcucaucccgucc.....                                                                                     | 1     | 1  |
|     | .....ugcugccgacucauccCucc.....                                                                                      | 1     | 1  |
|     | .....ugcugccgacucaucccgucc.....                                                                                     | 17    | 0  |
|     | .....ugcugccgacucaucccgucA.....                                                                                     | 2     | 1  |
|     | .....ugcugccgacucauccGguccg.....                                                                                    | 1     | 1  |
|     | .....Ngcugccgacucaucccguccg.....                                                                                    | 2     | 1  |
|     | .....ugcugccgacucaucccgucg.....                                                                                     | 1064  | 0  |
|     | .....ugcugccgacucaCccgucg.....                                                                                      | 4     | 1  |
|     | .....ugcugccgacucaucccgCccg.....                                                                                    | 3     | 1  |
|     | .....ugcugccgacucauccAgucg.....                                                                                     | 1     | 1  |
|     | .....ugcGccgacucaucccgucg.....                                                                                      | 2     | 1  |
|     | .....ugcugccgUcucaucccgucg.....                                                                                     | 1     | 1  |
|     | .....ugcugccgacucaucccguccC.....                                                                                    | 7     | 1  |
|     | .....Ggcugccgacucaucccgucg.....                                                                                     | 4     | 1  |
|     | .....ugcugccgacucGuccgucg.....                                                                                      | 7     | 1  |
|     | .....ugcugccgacCcauccgucg.....                                                                                      | 4     | 1  |
|     | .....ugcugccgacucaucccgucUg.....                                                                                    | 5     | 1  |
|     | .....ugcugUcgacucaucccgucg.....                                                                                     | 2     | 1  |
|     | .....ugcugcUgacucaucccgucg.....                                                                                     | 3     | 1  |
|     | .....ugcugccgacucaucccguccU.....                                                                                    | 25    | 1  |
|     | .....ugcugccgacucaucccgucAg.....                                                                                    | 10    | 1  |
|     | .....ugcugccgacucauccAuccg.....                                                                                     | 3     | 1  |
|     | .....ugcugccgacucaucccguaLcg.....                                                                                   | 1     | 1  |
|     | .....Cgcugccgacucaucccgucg.....                                                                                     | 2     | 1  |
|     | .....ugcugccgacugAuccgucg.....                                                                                      | 1     | 1  |

## Mature

## Star

|                                                                                                           |     |   |     |
|-----------------------------------------------------------------------------------------------------------|-----|---|-----|
| ggcuuucaugaaguagaucugcugccgacucauccguccggcucucuuaaaggaaucaacgccauaggcuagccgaaugguugaugcgggagcugguuuucucua |     |   |     |
| .....ugcugccgacucauccgGccg.....                                                                           | 1   | 1 | seq |
| .....ugcugccgGcucauccguccg.....                                                                           | 3   | 1 | seq |
| .....ugcugccgacucauccguccA.....                                                                           | 116 | 1 | seq |
| .....ugcugccgacucauccgUcg.....                                                                            | 1   | 1 | seq |
| .....Agcugccgacucauccguccg.....                                                                           | 3   | 1 | seq |
| .....ugcuAccgacucauccguccg.....                                                                           | 1   | 1 | seq |
| .....ugUugccgacucauccguccg.....                                                                           | 1   | 1 | seq |
| .....ugcugccgacucauccguccgU.....                                                                          | 4   | 1 | seq |
| .....ugcugccgacucauccguccgg.....                                                                          | 3   | 0 | seq |
| .....ugcugccgacucauccguccgA.....                                                                          | 2   | 1 | seq |
| .....ugcugccgacucauccguccgC.....                                                                          | 4   | 1 | seq |
| .....gcugccgacucauccguccg.....                                                                            | 1   | 0 | seq |
| .....ugccgacucauccguccg.....                                                                              | 1   | 0 | seq |
| .....uagguagccgaauggugau.....                                                                             | 4   | 0 | seq |
| .....aaugguugaugcgggagc.....                                                                              | 3   | 0 | seq |
| .....aaugguAgaugcgggagc.....                                                                              | 1   | 1 | seq |
| .....aaugguugaugcgggagcA.....                                                                             | 2   | 1 | seq |
| .....aaugCuugaugcgggagcu.....                                                                             | 1   | 1 | seq |
| .....aaugguugaugcgggagcC.....                                                                             | 3   | 1 | seq |
| .....aaugguugaugcGAgagcu.....                                                                             | 1   | 1 | seq |
| .....aaugguugaugcgggagcu.....                                                                             | 29  | 0 | seq |
| .....aaugguugaugcgggagcGg.....                                                                            | 1   | 1 | seq |
| .....aaugguugaugcgggagcug.....                                                                            | 48  | 0 | seq |
| .....aaugguugaugcgggagcuU.....                                                                            | 3   | 1 | seq |
| .....aaugguugaugcgggagcuA.....                                                                            | 3   | 1 | seq |
| .....aaugguugGugcgggagcugg.....                                                                           | 1   | 1 | seq |
| .....aaUguugaugcgggagcugg.....                                                                            | 1   | 1 | seq |
| .....aaugguugaugcgggagcugA.....                                                                           | 27  | 1 | seq |
| .....Naugguugaugcgggagcugg.....                                                                           | 1   | 1 | seq |
| .....aaugguugaugcgggagcugU.....                                                                           | 2   | 1 | seq |
| .....aGugguugaugcgggagcugg.....                                                                           | 1   | 1 | seq |
| .....aaugguugaugcAggagcugg.....                                                                           | 1   | 1 | seq |
| .....aaugguugaugUgggagcugg.....                                                                           | 1   | 1 | seq |
| .....aaugguugaugcgggagcuAg.....                                                                           | 3   | 1 | seq |
| .....aaugguugaugcgggGgcugg.....                                                                           | 3   | 1 | seq |
| .....aaugguugaugcgggagcGgg.....                                                                           | 1   | 1 | seq |
| .....aaugguugaCgcgggagcugg.....                                                                           | 1   | 1 | seq |
| .....Gaugguugaugcgggagcugg.....                                                                           | 5   | 1 | seq |
| .....aaugguugaugcgggagcugC.....                                                                           | 2   | 1 | seq |
| .....aaugguugaugcgggagcugg.....                                                                           | 313 | 0 | seq |
| .....aaugguugaugcgggagcuUg.....                                                                           | 1   | 1 | seq |
| .....aaugguugaugcgggagcuggA.....                                                                          | 5   | 1 | seq |
| .....aaugguugaugcgggagcugUu.....                                                                          | 1   | 1 | seq |
| .....aaugguugaugcgggagcuggu.....                                                                          | 20  | 0 | seq |
| .....aaugguugaugcgggagcugguC.....                                                                         | 5   | 1 | seq |
| .....aaugguugaugcgggagcugguu.....                                                                         | 4   | 0 | seq |
| .....aaugguugaugcgggagcuggAu.....                                                                         | 3   | 1 | seq |
| .....aaugguugaugcgggagcugguG.....                                                                         | 1   | 1 | seq |
| .....aaugguugaugcgggagcugguA.....                                                                         | 5   | 1 | seq |
| .....aaugguugaugcgggagcugguAu.....                                                                        | 1   | 1 | seq |
| .....aaugguugaugcgggagcuggAuu.....                                                                        | 3   | 1 | seq |
| .....aaugguugaugcgggagcugguuA.....                                                                        | 1   | 1 | seq |
| .....augguugaugcgggagcu.....                                                                              | 4   | 0 | seq |
| .....augguugaugcgggagcug.....                                                                             | 4   | 0 | seq |
| .....augguugaugcgggagcugg.....                                                                            | 1   | 0 | seq |
| .....ugguugaugcgggagcu.....                                                                               | 1   | 0 | seq |
| .....ugguugaugcgggagcug.....                                                                              | 1   | 0 | seq |
| .....ugguugaugcgggagcugg.....                                                                             | 1   | 0 | seq |
| .....guugaugcgggagcugguu.....                                                                             | 1   | 0 | seq |

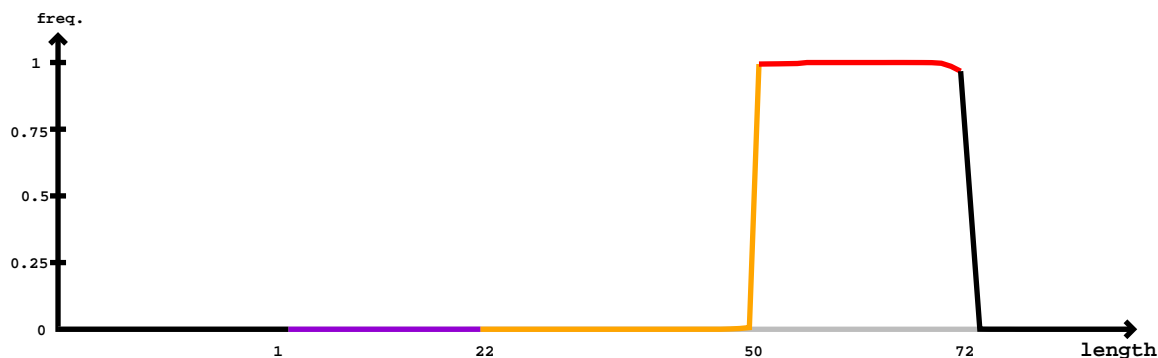

## Mature

## Star

## Mature

caauuggcagucauucacauugugucaaaauuauucaagcaauuacagcaaugcuaaaucggcguguaacauugcuugaguaacuugaacacacaauaugguugcagauugc

|                                   |     |   |     |
|-----------------------------------|-----|---|-----|
| .....Guugcuugaguaacuugaaca.....   | 1   | 1 | seq |
| .....Cuugcuugaguaacuugaacaca..... | 1   | 1 | seq |
| .....auugcuugaguaacuugaacaca..... | 1   | 0 | seq |
| .....uugcuugaguaacuuga.....       | 10  | 0 | seq |
| .....uugcuugaguaacuugaa.....      | 16  | 0 | seq |
| .....uugcuCgaguaacuugaac.....     | 1   | 1 | seq |
| .....uugcuugaguaacuugaCc.....     | 1   | 1 | seq |
| .....uugcuugaguaacuugaac.....     | 99  | 0 | seq |
| .....uugcCugaguaacuugaac.....     | 1   | 1 | seq |
| .....uugcuugaguaacuCgaac.....     | 1   | 1 | seq |
| .....uugcuugagCaacuugaac.....     | 1   | 1 | seq |
| .....uugcuugaguaacuugaaU.....     | 3   | 1 | seq |
| .....uugcuugaguaacCugaac.....     | 2   | 1 | seq |
| .....uugcuugaguaacuugaaA.....     | 1   | 1 | seq |
| .....Augcuugaguaacuugaac.....     | 1   | 1 | seq |
| .....uugcuugaguaacuCgaaca.....    | 1   | 1 | seq |
| .....uugcuugaguaacuugaacU.....    | 7   | 1 | seq |
| .....uugcuugaguaacuugaacC.....    | 1   | 1 | seq |
| .....uugcuugaguaacuugaaUa.....    | 1   | 1 | seq |
| .....Nugcuugaguaacuugaaca.....    | 1   | 1 | seq |
| .....uugcuugaguaGcuugaaca.....    | 1   | 1 | seq |
| .....uugcuugaguaacuugaaca.....    | 325 | 0 | seq |
| .....uugcuugaguaacCugaaca.....    | 1   | 1 | seq |
| .....uuAcuugaguaacuugaaca.....    | 1   | 1 | seq |
| .....uugUuugaguaacuugaaca.....    | 1   | 1 | seq |
| .....uugcuugaguaaUuugaaca.....    | 1   | 1 | seq |
| .....uugcuugagCaacuugaaca.....    | 1   | 1 | seq |
| .....uugcuugaguaacuugGaca.....    | 2   | 1 | seq |
| .....uugcuAagaguaacuugaaca.....   | 1   | 1 | seq |
| .....uugcuugaguGacuugaaca.....    | 1   | 1 | seq |
| .....uugcuugaAuaacuugaacac.....   | 1   | 1 | seq |
| .....uuAcuugaguaacuugaacac.....   | 1   | 1 | seq |
| .....uugcuCgaguaacuugaacac.....   | 1   | 1 | seq |
| .....uugcuugaguaacuCgaacac.....   | 2   | 1 | seq |
| .....uAgcugaguaacuugaacac.....    | 2   | 1 | seq |
| .....uugcuugaguaacuugaacaU.....   | 58  | 1 | seq |
| .....Augcuugaguaacuugaacac.....   | 2   | 1 | seq |
| .....uugcuugaguaacuugaUcac.....   | 1   | 1 | seq |
| .....uugcGugaguaacuugaacac.....   | 1   | 1 | seq |
| .....uugcuugaguaacuugaaUac.....   | 1   | 1 | seq |
| .....uugcuugaguaacuugGacac.....   | 1   | 1 | seq |
| .....uugcuugaguaacuugaacaA.....   | 5   | 1 | seq |
| .....uugcuugGguaacuugaacac.....   | 4   | 1 | seq |
| .....uugcuugaguCacuugaacac.....   | 1   | 1 | seq |
| .....uugcuugaguaacuuaaacac.....   | 1   | 1 | seq |
| .....uugUuugaguaacuugaacac.....   | 1   | 1 | seq |
| .....Cugcuugaguaacuugaacac.....   | 4   | 1 | seq |
| .....uugcuugaguaaGuugaacac.....   | 1   | 1 | seq |
| .....uugcuugaguaacuugaacaG.....   | 2   | 1 | seq |
| .....uugcuugaguaUcuugaacac.....   | 1   | 1 | seq |
| .....uugcuugaguaacCugaacac.....   | 2   | 1 | seq |
| .....uugcuugaguaacuugaGcac.....   | 4   | 1 | seq |
| .....uugcuugaguaacAugaacac.....   | 1   | 1 | seq |
| .....uugcuugaguaacuAgaacac.....   | 1   | 1 | seq |
| .....uGcuugaguaacuugaacac.....    | 4   | 1 | seq |
| .....uugcuugagCaacuugaacac.....   | 5   | 1 | seq |
| .....uugcuugaguaacuugaacac.....   | 876 | 0 | seq |
| .....uugcuugaguaCcuugaacac.....   | 1   | 1 | seq |
| .....uugcuugaguaacuugaaAaca.....  | 7   | 1 | seq |
| .....uugcuugCguaacuugaacaca.....  | 9   | 1 | seq |
| .....uugcuugaguaacuCgaacaca.....  | 129 | 1 | seq |
| .....uugcuugaguCacuugaacaca.....  | 5   | 1 | seq |
| .....uugcuugaguaacuuaaacaca.....  | 22  | 1 | seq |
| .....uugcuugaguaacuugaacaUa.....  | 41  | 1 | seq |
| .....uugcuugUguaacuugaacaca.....  | 21  | 1 | seq |
| .....uugcuugaguaacuugGacaca.....  | 163 | 1 | seq |
| .....uugcuCgaguaacuugaacaca.....  | 101 | 1 | seq |

## Star

## Mature

caauuggcagucacauucacauugugucaaaauuauucaagcaauuacagcaaugcuaaaucggcguguacauugcuugaguaacuuagaacacacaaaauaugguugcagauugc

|                                        |       |   |     |
|----------------------------------------|-------|---|-----|
| .....uugcuuAaguaacuuagaacaca.....      | 14    | 1 | seq |
| .....uugcuugaguaacuuUacaca.....        | 7     | 1 | seq |
| .....uugcuugaguaaacCugaacaca.....      | 114   | 1 | seq |
| .....uugcuugGguaacuuagaacaca.....      | 154   | 1 | seq |
| .....uAgcuuagaguaacuuagaacaca.....     | 22    | 1 | seq |
| .....uugcuugaguaacuuugaaGaca.....      | 13    | 1 | seq |
| .....Nugcuugaguaacuuagaacaca.....      | 62    | 1 | seq |
| .....uugcuugaguaacuuagaacaca.....      | 48406 | 0 | seq |
| .....uugGuugaguaacuuagaacaca.....      | 2     | 1 | seq |
| .....uugcuugaguaGcuugaacaca.....       | 134   | 1 | seq |
| .....uugcuugaguaUcuugaacaca.....       | 15    | 1 | seq |
| .....uugcuugaguaacuuugaUcaca.....      | 10    | 1 | seq |
| .....uugcuugaguUacuugaacaca.....       | 13    | 1 | seq |
| .....uugcuGgaguaacuuagaacaca.....      | 14    | 1 | seq |
| .....uugcuugaguaacuuugaacacC.....      | 64    | 1 | seq |
| .....uugcuugaguaacuuugaacCca.....      | 12    | 1 | seq |
| .....Gugcuugaguaacuuagaacaca.....      | 79    | 1 | seq |
| .....uugcuugaguaacuuUaacaca.....       | 2     | 1 | seq |
| .....uugcuugaguaacuuGcacaca.....       | 8     | 1 | seq |
| .....uugcuugaguaCcuugaacaca.....       | 13    | 1 | seq |
| .....uuAcuugaguaacuuagaacaca.....      | 34    | 1 | seq |
| .....uugcuugaguaacAugaacaca.....       | 35    | 1 | seq |
| .....uugcuugaguaacuuagaacaGa.....      | 3     | 1 | seq |
| .....uugcuugaCuaacuuagaacaca.....      | 2     | 1 | seq |
| .....uugcuugagAaacuuagaacaca.....      | 18    | 1 | seq |
| .....Augcuugaguaacuuagaacaca.....      | 51    | 1 | seq |
| .....uugcuugaguaacuuugaacGca.....      | 181   | 1 | seq |
| .....uugcuuCaguaacuuagaacaca.....      | 2     | 1 | seq |
| .....uugcuugaguaacuuugaGcaca.....      | 184   | 1 | seq |
| .....uugcuugaguaacuuugaacacG.....      | 1272  | 1 | seq |
| .....uugcuugagCaacuuagaacaca.....      | 91    | 1 | seq |
| .....uugAuugaguaacuuagaacaca.....      | 5     | 1 | seq |
| .....uugcuugaguaAAuugaacaca.....       | 6     | 1 | seq |
| .....uugcuugaAuaacuuagaacaca.....      | 17    | 1 | seq |
| .....uugcuugaguaaUuugaacaca.....       | 22    | 1 | seq |
| .....uugcuugaguaacuuugaCcaca.....      | 4     | 1 | seq |
| .....uugcuugaguaacGugaacaca.....       | 7     | 1 | seq |
| .....uugcuugaguaacuuCaacaca.....       | 4     | 1 | seq |
| .....uugcuugaguaacuuAgaacaca.....      | 17    | 1 | seq |
| .....uugcuuUaguaacuuagaacaca.....      | 7     | 1 | seq |
| .....uugcuAagaguaacuuagaacaca.....     | 23    | 1 | seq |
| .....uugcuugagGaacuuagaacaca.....      | 15    | 1 | seq |
| .....uugUuugaguaacuuagaacaca.....      | 52    | 1 | seq |
| .....uugcuugaguaaGuugaacaca.....       | 10    | 1 | seq |
| .....uuUcuugaguaacuuagaacaca.....      | 11    | 1 | seq |
| .....uugcuugaguaacuuugaaUaca.....      | 46    | 1 | seq |
| .....uugcAugaguaacuuagaacaca.....      | 16    | 1 | seq |
| .....uugcuugaguaacuuugaacaAa.....      | 7     | 1 | seq |
| .....Cugcuugaguaacuuagaacaca.....      | 116   | 1 | seq |
| .....uGgcuuugaguaacuuagaacaca.....     | 121   | 1 | seq |
| .....uugcuugaguaacuuugaacUca.....      | 19    | 1 | seq |
| .....uugcuugaguGacuugaacaca.....       | 113   | 1 | seq |
| .....uugcuugaguaacuuGgaacaca.....      | 14    | 1 | seq |
| .....uuCcuugaguaacuuugaacaca.....      | 7     | 1 | seq |
| .....uugcGugaguaacuuugaacaca.....      | 18    | 1 | seq |
| .....uGgcuuugaguaacuuugaacaca.....     | 2     | 1 | seq |
| .....uugcuugaUuaacuuugaacaca.....      | 4     | 1 | seq |
| .....uugcCugaguaacuuugaacaca.....      | 118   | 1 | seq |
| .....uugcuugaguaacuuugaacacaU.....     | 10    | 1 | seq |
| .....uugcuugaguaacuuugaacacaC.....     | 2     | 1 | seq |
| .....uugcuugaguaacuuugaacacaa.....     | 13    | 0 | seq |
| .....uugcuugaguaacuuugaacacCa.....     | 3     | 1 | seq |
| .....uugcuugaguaacuuugaacacacG.....    | 3     | 1 | seq |
| .....uugcuugaguaacuuugaaAacaa.....     | 1     | 1 | seq |
| .....uugcuugaguaacuuugaacacacUu.....   | 9     | 1 | seq |
| .....uugcuugaguaacuuugaacacacaaG.....  | 1     | 1 | seq |
| .....uugcuugaguaacuuugaacacacCu.....   | 2     | 1 | seq |
| .....uugcuugaguaacuuugaacacacaaGa..... | 3     | 1 | seq |
| .....uugcuugaguaacuuugaacacacaaAa..... | 1     | 1 | seq |
| .....ugcuugaguaacuuugaaca.....         | 5     | 0 | seq |

## Star

## Mature

caauuggcagucaucacauugugucaaaauuauucaagcaauuacagcaaugcuaaaucggcgucguacaauugcuugaguaaacuugaacacacaauaugguugcagauugc

|                                      |     |   |     |
|--------------------------------------|-----|---|-----|
| .....ugcuugaguaaacuugaacaUa.....     | 1   | 1 | seq |
| .....ugcuCgaguaaacuugaacaca.....     | 1   | 1 | seq |
| .....uUcuugaguaaacuugaacaca.....     | 2   | 1 | seq |
| .....ugcuugaguaaacuugaacaca.....     | 17  | 0 | seq |
| .....gcuugaguaaacuugaac.....         | 3   | 0 | seq |
| .....gcuugaguaaacuugaaca.....        | 1   | 0 | seq |
| .....gcuugaguaaacuugaacac.....       | 1   | 0 | seq |
| .....gcuugaguaaacuugaacaU.....       | 1   | 1 | seq |
| .....gcuugaguaaacuugaGcaca.....      | 1   | 1 | seq |
| .....gcuugaguaaacuugaacaca.....      | 13  | 0 | seq |
| .....Uuugaguaaacuugaaca.....         | 1   | 1 | seq |
| .....cuugaguaaacuugaaca.....         | 1   | 0 | seq |
| .....cuugaguaaacuugaacac.....        | 1   | 0 | seq |
| .....cuugaguaaacuugaacaca.....       | 29  | 0 | seq |
| .....cuugaguaaacuugaacGca.....       | 1   | 1 | seq |
| .....uugaguaaacuugaacac.....         | 1   | 0 | seq |
| .....uCgaguaaacuugaacaca.....        | 2   | 1 | seq |
| .....Nugaguaaacuugaacaca.....        | 1   | 1 | seq |
| .....uugaguaaacuugaacaca.....        | 30  | 0 | seq |
| .....ugaguaaacuugaacacC.....         | 1   | 1 | seq |
| .....uAaguaaacuugaacaca.....         | 1   | 1 | seq |
| .....ugaguaaacuugaCcaca.....         | 1   | 1 | seq |
| .....ugaguaaacuugaacGca.....         | 1   | 1 | seq |
| .....ugaguaaacuugaacacG.....         | 6   | 1 | seq |
| .....ugaguaaacuugaacaca.....         | 183 | 0 | seq |
| .....ugaguaaacuugaGcaca.....         | 2   | 1 | seq |
| .....ugaguaaacuugaacacacaauaug.....  | 3   | 0 | seq |
| .....ugaacacacaauaugguugUagauug..... | 1   | 1 | seq |





## Star

## Mature

accacaauccggagauuuugacuggguugaccaaaaugcugguaauuaccaaaguucucacacucagacucggc~~aaagacucggc~~gccuaguacugggcaauuac

|                                                   |   |   |     |
|---------------------------------------------------|---|---|-----|
| .....cagacucggc <del>aaagacucggc</del> cu.....    | 1 | 0 | seq |
| .....cagacucggc <del>aaagacuc</del> Agcu.....     | 1 | 1 | seq |
| .....cGgacucggc <del>aaagacucggc</del> ug.....    | 4 | 1 | seq |
| .....cagacucggc <del>aaagacucgg</del> Uuggcc..... | 1 | 1 | seq |
| .....agacucgA <del>caaagacuc</del> .....          | 1 | 1 | seq |
| .....agacucggc <del>aaagacucg</del> .....         | 2 | 0 | seq |
| .....agacucgA <del>caaagacucg</del> .....         | 1 | 1 | seq |
| .....Ggacucggc <del>aaagacucgg</del> .....        | 1 | 1 | seq |
| .....Ggacucggc <del>aaagacucgg</del> cu.....      | 1 | 1 | seq |
| .....agacucggc <del>aaagacucgg</del> cu.....      | 1 | 0 | seq |
| .....agacucggc <del>aaagacucgg</del> cA.....      | 1 | 1 | seq |
| .....Ggacucggc <del>aaagacucgg</del> cug.....     | 3 | 1 | seq |
| .....Ggacucggc <del>aaagacucgg</del> cuggc.....   | 2 | 1 | seq |
| .....gacucAg <del>caaagacucg</del> .....          | 1 | 1 | seq |
| .....gacucggc <del>aaagacucg</del> .....          | 6 | 0 | seq |
| .....gacucggcC <del>aaagacucg</del> .....         | 3 | 1 | seq |
| .....gacucggcA <del>aaagacucg</del> .....         | 1 | 1 | seq |
| .....gacucgA <del>caaagacucg</del> .....          | 5 | 1 | seq |
| .....gacucggG <del>aaagacucgg</del> .....         | 1 | 1 | seq |
| .....gacucgC <del>aaagacucgg</del> .....          | 1 | 1 | seq |
| .....gacucggc <del>aaagacucgg</del> A.....        | 1 | 1 | seq |
| .....gacucggc <del>aaagacucgg</del> c.....        | 1 | 1 | seq |
| .....gacucggc <del>aaagacucgg</del> c.....        | 4 | 0 | seq |
| .....gacucggc <del>aaagacucgg</del> U.....        | 2 | 1 | seq |
| .....gacucggc <del>aaagacucgg</del> cu.....       | 5 | 0 | seq |
| .....gacucggc <del>aaagacucgg</del> c.....        | 1 | 1 | seq |
| .....gacucggc <del>aaagacucgg</del> cA.....       | 1 | 1 | seq |
| .....gacuUggc <del>aaagacucgg</del> cu.....       | 1 | 1 | seq |
| .....gaGucggc <del>aaagacucgg</del> cug.....      | 1 | 1 | seq |
| .....gacucggc <del>aaagacucgg</del> cug.....      | 2 | 0 | seq |
| .....gacucggc <del>aaagacucgg</del> cugg.....     | 1 | 0 | seq |
| .....gacucggc <del>aaagacucgg</del> cuggc.....    | 3 | 0 | seq |
| .....gacucggc <del>aaagacucgg</del> cuggcA.....   | 1 | 1 | seq |
| .....acucggcA <del>aaagacucgg</del> .....         | 1 | 1 | seq |
| .....acucggc <del>aaagacu</del> Agg.....          | 1 | 1 | seq |
| .....acucggc <del>aaagacucgg</del> .....          | 2 | 0 | seq |
| .....acucggc <del>aaagacucgg</del> c.....         | 4 | 1 | seq |
| .....acucgA <del>caaagacucgg</del> cu.....        | 1 | 1 | seq |
| .....acucggc <del>aaagacucgg</del> cu.....        | 2 | 0 | seq |
| .....acucggc <del>aaagacucgg</del> cu.....        | 1 | 1 | seq |
| .....acucggc <del>aaagacucgg</del> cA.....        | 2 | 1 | seq |
| .....acucggc <del>aaagacu</del> Uggcug.....       | 1 | 1 | seq |
| .....acucggc <del>aaagacucgg</del> cuA.....       | 1 | 1 | seq |
| .....acucggc <del>aaagacucgg</del> cug.....       | 1 | 0 | seq |
| .....acucggc <del>aaagacucgg</del> cAg.....       | 1 | 1 | seq |
| .....acucggc <del>aaagacucgg</del> cugg.....      | 1 | 0 | seq |
| .....acucggc <del>aaagacucgg</del> cuggc.....     | 1 | 0 | seq |
| .....acucggc <del>aaagacucgg</del> cuggcA.....    | 1 | 1 | seq |
| .....acucggc <del>aaagacucgg</del> cuggcG.....    | 1 | 1 | seq |
| .....cucggc <del>aaagacucgg</del> .....           | 2 | 0 | seq |
| .....cucggc <del>aaagacucgg</del> U.....          | 1 | 1 | seq |
| .....cucggc <del>aaagacuc</del> Agcu.....         | 1 | 1 | seq |
| .....cucggc <del>aaagacucgg</del> cu.....         | 4 | 0 | seq |
| .....cucggcA <del>aaagacucgg</del> cug.....       | 1 | 1 | seq |
| .....cucggc <del>aaagacucgg</del> cug.....        | 8 | 0 | seq |
| .....cucggc <del>aaagacucgg</del> cugg.....       | 1 | 0 | seq |
| .....cucggc <del>aaagacucgg</del> cuggc.....      | 1 | 1 | seq |
| .....cucggc <del>aaagacucgg</del> cuggcA.....     | 2 | 1 | seq |
| .....cucggc <del>aaagacucgg</del> cuggcAu.....    | 1 | 1 | seq |
| .....cucggc <del>aaagacucgg</del> cuggcAua.....   | 1 | 1 | seq |
| .....ucggc <del>aaagacucgg</del> cu.....          | 1 | 1 | seq |
| .....ucggc <del>aaagacucgg</del> cuggcA.....      | 1 | 1 | seq |
| .....cggc <del>aaagacucgg</del> cuggc.....        | 1 | 0 | seq |
| .....ggc <del>aaagacucgg</del> cuggcG.....        | 1 | 1 | seq |
| .....ggc <del>aaagacucgg</del> cuggc.....         | 1 | 1 | seq |
| .....ggc <del>aaagacucgg</del> cuggcAu.....       | 1 | 1 | seq |
| .....ggc <del>aaagacucgg</del> cuggcUu.....       | 1 | 1 | seq |
| .....gca <del>aaagacucgg</del> cuggcU.....        | 1 | 1 | seq |

Star

Mature

accacaauccggagauuuugacuggguugaccaaaaaugcugguaauuaccaaaguuucacacucagacucggcaaagacucggcuggccuaguacuuggcaaauac  
.....gcaaagacucggcuggcA..... 1 1 seq

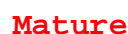[illegible]

## Star

## Mature

|                                                                                                                 |       |   |     |
|-----------------------------------------------------------------------------------------------------------------|-------|---|-----|
| auuacuugaauaggauuucugagcauuauuugcggaggaaaaaaauugcacaggaucuguuuccuccgcaauugaugcucagaaauccugcuacaucaaaacuucaguuaa |       |   |     |
| .....uccgcaaCugaugcucagaaa.....                                                                                 | 10    | 1 | seq |
| .....Cccgcaauugaugcucagaaa.....                                                                                 | 1     | 1 | seq |
| .....uccgcaaCugaugcucagaaa.....                                                                                 | 8     | 1 | seq |
| .....uccgcaaCugaugcucagaaauc.....                                                                               | 5     | 1 | seq |
| .....caaCugaugcucagaaaucc.....                                                                                  | 1     | 1 | seq |
| .....caaCugaugcucagaaauccug.....                                                                                | 2     | 1 | seq |
| .....aaCugaugcucagaaa.....                                                                                      | 2     | 1 | seq |
| .....aaugaugcucagaaaC.....                                                                                      | 1     | 1 | seq |
| .....aaugaugcucagaaa.....                                                                                       | 1     | 0 | seq |
| .....aaCugaugcucagaaauc.....                                                                                    | 6     | 1 | seq |
| .....aaCugaugcucagaaaucc.....                                                                                   | 23    | 1 | seq |
| .....aaugaugcucagaaaucc.....                                                                                    | 2     | 0 | seq |
| .....aaugaugcucagaaauccu.....                                                                                   | 2     | 0 | seq |
| .....aaCugaugcucagaaauccu.....                                                                                  | 12    | 1 | seq |
| .....aaugaugcCagaaauccG.....                                                                                    | 8     | 1 | seq |
| .....Nauugaugcucagaaauccug.....                                                                                 | 1     | 1 | seq |
| .....aaugaugcucagaGauccug.....                                                                                  | 2     | 1 | seq |
| .....aaugaCgucagaaauccug.....                                                                                   | 1     | 1 | seq |
| .....aaugaugcucaAaaauccug.....                                                                                  | 2     | 1 | seq |
| .....aaugaugcucagaaauccug.....                                                                                  | 1071  | 0 | seq |
| .....aaugaugcCagaaauccug.....                                                                                   | 1     | 1 | seq |
| .....aaugaugcuUagaaauccug.....                                                                                  | 1     | 1 | seq |
| .....aaGugaugcucagaaauccug.....                                                                                 | 6     | 1 | seq |
| .....aaugaugcucGagaaauccug.....                                                                                 | 1     | 1 | seq |
| .....aaugaugcucagaaauccuU.....                                                                                  | 6     | 1 | seq |
| .....aaugaugcucagaaauccuC.....                                                                                  | 3     | 1 | seq |
| .....aaUGaugcucagaaauccug.....                                                                                  | 2     | 1 | seq |
| .....aaugaugcucagaaaCccug.....                                                                                  | 3     | 1 | seq |
| .....aaugCugcucagaaauccug.....                                                                                  | 1     | 1 | seq |
| .....aaugaugcucagaaauccG.....                                                                                   | 4     | 1 | seq |
| .....aaugaugcucagGaauccug.....                                                                                  | 1     | 1 | seq |
| .....aaugaugcucagaaCuccug.....                                                                                  | 1     | 1 | seq |
| .....aaCugaugcucagaaauccug.....                                                                                 | 10501 | 1 | seq |
| .....Gauugaugcucagaaauccug.....                                                                                 | 7     | 1 | seq |
| .....aaugUugcucagaaauccug.....                                                                                  | 1     | 1 | seq |
| .....aaugaugcuGagaaauccug.....                                                                                  | 1     | 1 | seq |
| .....aaUGaugcucagaaauccug.....                                                                                  | 2     | 1 | seq |
| .....aaugaugcucagaaGuccug.....                                                                                  | 1     | 1 | seq |
| .....aaugaugcucagaaaucUug.....                                                                                  | 1     | 1 | seq |
| .....aaugaugcucagaaauccAg.....                                                                                  | 5     | 1 | seq |
| .....aaugaugcucagaaauccuA.....                                                                                  | 44    | 1 | seq |
| .....aGuugaugcucagaaauccug.....                                                                                 | 1     | 1 | seq |
| .....aaugaugGucagaaauccug.....                                                                                  | 1     | 1 | seq |
| .....aaugaugcucagaaaucAug.....                                                                                  | 1     | 1 | seq |
| .....aaugaugcucagaaaUcug.....                                                                                   | 1     | 1 | seq |
| .....aaAugaugcucagaaauccug.....                                                                                 | 4     | 1 | seq |
| .....Uauugaugcucagaaauccug.....                                                                                 | 1     | 1 | seq |
| .....aaugGugcucagaaauccug.....                                                                                  | 4     | 1 | seq |
| .....aaugaugcucagaaauccuU.....                                                                                  | 1     | 1 | seq |
| .....aaugaugcucagaaauccugA.....                                                                                 | 2     | 1 | seq |
| .....aCugaugcucagaaauccu.....                                                                                   | 2     | 1 | seq |
| .....aCugaugcucagaaauccug.....                                                                                  | 150   | 1 | seq |
| .....auugaugcucagaaauccug.....                                                                                  | 3     | 0 | seq |
| .....auugaugcucagaaauccugC.....                                                                                 | 3     | 0 | seq |
| .....Cugaugcucagaaauccug.....                                                                                   | 6     | 1 | seq |
| .....ugaugcucagaaauccug.....                                                                                    | 5     | 0 | seq |
| .....ugaugcucagaaauccuA.....                                                                                    | 1     | 1 | seq |
| .....gaugcucagaaauccug.....                                                                                     | 7     | 0 | seq |

Provisional ID : MA\_3400039\_41391  
 Score total : 173.1  
 Score for star read(s) : 3.9  
 Score for read counts : 179.6  
 Score for mfe : -8.1  
 Score for randfold : -2.2  
 Score for cons. seed :  
 Total read count : 364  
 Mature read count : 363  
 Loop read count : 0  
 Star read count : 1

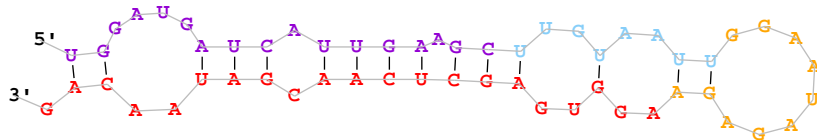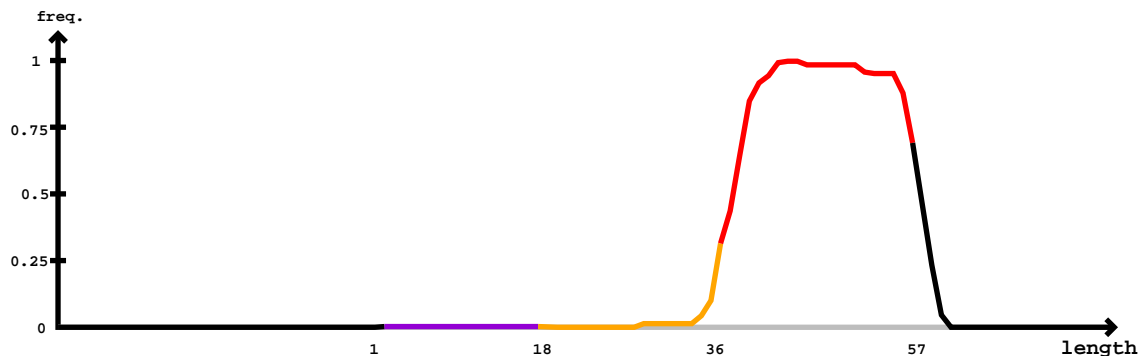

Star

Mature

| 5'                                | obs | exp | reads | mm  | sample |
|-----------------------------------|-----|-----|-------|-----|--------|
| ggaugaagaaccucguggaggugauugauaga  | 1   | 1   | 1     | seq |        |
| ggaugaagaaccucguggaggugauugauaga  | 5   | 1   | 5     | seq |        |
| ..(((..(((..)))..)))..            | 10  | 1   | 10    | seq |        |
| .....uggaugaucauugaUc.....        | 1   | 1   | 1     | seq |        |
| .....aauagagaaCgugagcu.....       | 1   | 1   | 1     | seq |        |
| .....gaagAugagcucaacga.....       | 2   | 1   | 2     | seq |        |
| .....gaaggugagcucaacgaGaacag..... | 3   | 1   | 3     | seq |        |
| .....aaggugagcucaacgaA.....       | 4   | 1   | 4     | seq |        |
| .....aagAugagcucaacgauaac.....    | 7   | 1   | 7     | seq |        |
| .....aaggugagcucaacgaGaacag.....  | 5   | 1   | 5     | seq |        |
| .....agAugagcucaacgauaac.....     | 9   | 1   | 9     | seq |        |
| .....agAugagcucaacgauaac.....     | 10  | 1   | 10    | seq |        |
| .....aggugagcucaacgaGaacag.....   | 34  | 1   | 34    | seq |        |
| .....agAugagcucaacgauaacag.....   | 2   | 1   | 2     | seq |        |
| .....agAugagcucaacgauaacag.....   | 2   | 1   | 2     | seq |        |
| .....aggugagcucaacgaGaacaga.....  | 22  | 1   | 22    | seq |        |
| .....gAugagcucaacgauaac.....      | 12  | 1   | 12    | seq |        |
| .....gAugagcucaacgauaac.....      | 19  | 1   | 19    | seq |        |
| .....gAugagcucaacgauaacag.....    | 4   | 1   | 4     | seq |        |
| .....ggugagcucaacgaGaacag.....    | 2   | 1   | 2     | seq |        |
| .....gAugagcucaacgauaacaga.....   | 6   | 1   | 6     | seq |        |
| .....ggugagcucaacgaGaacaga.....   | 2   | 1   | 2     | seq |        |
| .....Augagcucaacgauaac.....       | 3   | 1   | 3     | seq |        |
| .....Augagcucaacgauaac.....       | 17  | 1   | 17    | seq |        |
| .....Augagcucaacgauaacag.....     | 5   | 1   | 5     | seq |        |
| .....gugagcucaacgaGaacag.....     | 28  | 1   | 28    | seq |        |
| .....gugagcucaacgaGaacaga.....    | 24  | 1   | 24    | seq |        |
| .....ugagcucaacgauaac.....        | 10  | 0   | 10    | seq |        |
| .....ugagcucaacgaCaaca.....       | 5   | 1   | 5     | seq |        |
| .....ugagcucaacgaAaaca.....       | 3   | 1   | 3     | seq |        |
| .....ugagcucaacgauaacag.....      | 6   | 0   | 6     | seq |        |
| .....ugagcucaacgaCaacag.....      | 1   | 1   | 1     | seq |        |
| .....ugagcucaacgaAaacag.....      | 8   | 1   | 8     | seq |        |
| .....ugagcucaacgaCaacaga.....     | 2   | 1   | 2     | seq |        |

## Star

## Mature

|                                                                                                             |    |   |     |
|-------------------------------------------------------------------------------------------------------------|----|---|-----|
| ggauaagauccucguggaggugauugauagauggaugaucauugaagcuuguaauuggaauagagaaggugagcucaacgauaacagagaagacgaagagucucaac |    |   |     |
| .....ugagcucaacgauaacaga.....                                                                               | 3  | 0 | seq |
| .....ugagcucaacgaAaacaga.....                                                                               | 3  | 1 | seq |
| .....ugagcucaacgauaacagaA.....                                                                              | 1  | 1 | seq |
| .....ugagcucaacgaGaacagag.....                                                                              | 26 | 1 | seq |
| .....ugagcucaacgauaacagaAa.....                                                                             | 3  | 1 | seq |
| .....ugagcucaacgaGaacagaga.....                                                                             | 4  | 1 | seq |
| .....gagcucaacgaAaacag.....                                                                                 | 1  | 1 | seq |
| .....gagcucaacgaAaacaga.....                                                                                | 1  | 1 | seq |
| .....gagcucaacgauaacagaA.....                                                                               | 1  | 1 | seq |
| .....gagcucaacgaGaacagag.....                                                                               | 19 | 1 | seq |
| .....gagcucaacgaGaacagaga.....                                                                              | 3  | 1 | seq |
| .....agcucaacgaCaacaga.....                                                                                 | 1  | 1 | seq |
| .....agcucaacgaGaacagag.....                                                                                | 6  | 1 | seq |
| .....agcucaacgauaacagaA.....                                                                                | 1  | 1 | seq |
| .....agcucaacgaGaacagaga.....                                                                               | 2  | 1 | seq |
| .....gcucaacgaGaacagag.....                                                                                 | 15 | 1 | seq |
| .....gcucaacgaGaacagaga.....                                                                                | 3  | 1 | seq |
| .....cucaacgaGaacagaga.....                                                                                 | 2  | 1 | seq |

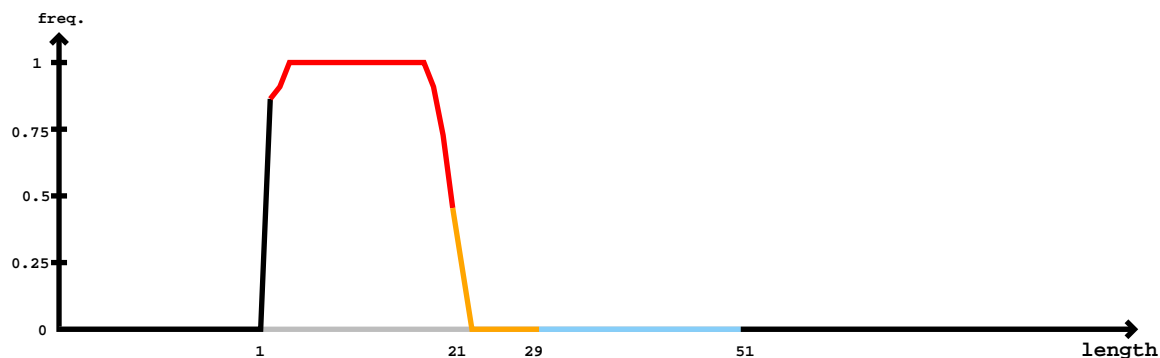[illegible]





## Mature

## Star

|                                                                                                                  |      |   |     |
|------------------------------------------------------------------------------------------------------------------|------|---|-----|
| augggacauuuuuuggaggccauggaaguuuagaggcuuuuacuguuuggggauuuuuuuauaggccuugaauuacaucaauccuuuuuguagcuugauuuucauaagcacg |      |   |     |
| .....aggccauggaagAuuga.....                                                                                      | 1    | 1 | seq |
| .....Nggccauggaaguuuga.....                                                                                      | 4    | 1 | seq |
| .....agUccauggaaguuuga.....                                                                                      | 1    | 1 | seq |
| .....aggccauggaGguuuga.....                                                                                      | 10   | 1 | seq |
| .....aggccUuggaaguuuga.....                                                                                      | 2    | 1 | seq |
| .....aggccauggaagGuuga.....                                                                                      | 4    | 1 | seq |
| .....aggccauggaaguuuga.....                                                                                      | 2992 | 0 | seq |
| .....aggccauggaaguCuga.....                                                                                      | 12   | 1 | seq |
| .....aggccauggaagAuuga.....                                                                                      | 1    | 1 | seq |
| .....Cggccauggaaguuuga.....                                                                                      | 1    | 1 | seq |
| .....aggccaCggaaguuugag.....                                                                                     | 1    | 1 | seq |
| .....aggccauggaaguuCGag.....                                                                                     | 2    | 1 | seq |
| .....aggccaugUaaguuugag.....                                                                                     | 1    | 1 | seq |
| .....aggccauggaaguuugag.....                                                                                     | 1308 | 0 | seq |
| .....aggccauggUaguuugag.....                                                                                     | 2    | 1 | seq |
| .....aggccauggaGguuugag.....                                                                                     | 3    | 1 | seq |
| .....aggcGauggaaguuugag.....                                                                                     | 1    | 1 | seq |
| .....Uggccauggaaguuugag.....                                                                                     | 1    | 1 | seq |
| .....aggcUauggaaguuugag.....                                                                                     | 2    | 1 | seq |
| .....aggccUuggaaguuugag.....                                                                                     | 3    | 1 | seq |
| .....aggccauggaaguuCugag.....                                                                                    | 1    | 1 | seq |
| .....aggccauggaaguuuAag.....                                                                                     | 1    | 1 | seq |
| .....aggccauggaaguuuCag.....                                                                                     | 3    | 1 | seq |
| .....aggccauggGaguuugag.....                                                                                     | 2    | 1 | seq |
| .....aggccauggaaguuugaU.....                                                                                     | 2    | 1 | seq |
| .....Nggccauggaaguuugag.....                                                                                     | 3    | 1 | seq |
| .....aggccauggaaguuCugagg.....                                                                                   | 1    | 1 | seq |
| .....aggccauggaaguuugaUg.....                                                                                    | 3    | 1 | seq |
| .....aggccauggaUguuugagg.....                                                                                    | 1    | 1 | seq |
| .....aggccauggaaguuAagagg.....                                                                                   | 2    | 1 | seq |
| .....aggccauggaaguuGgagg.....                                                                                    | 3    | 1 | seq |
| .....aggccauggaagGuugagg.....                                                                                    | 1    | 1 | seq |
| .....aggccaugAaaguuugagg.....                                                                                    | 2    | 1 | seq |
| .....aggccauggaaguuugagg.....                                                                                    | 4154 | 0 | seq |
| .....aggccaAaggaaguuugagg.....                                                                                   | 1    | 1 | seq |
| .....aggccauggaaguuugagA.....                                                                                    | 241  | 1 | seq |
| .....aggccUuggaaguuugagg.....                                                                                    | 1    | 1 | seq |
| .....aggcGauggaaguuugagg.....                                                                                    | 1    | 1 | seq |
| .....aggccauggUaguuugagg.....                                                                                    | 2    | 1 | seq |
| .....aggccauggaaguuugaCg.....                                                                                    | 5    | 1 | seq |
| .....Cggccauggaaguuugagg.....                                                                                    | 3    | 1 | seq |
| .....Uggccauggaaguuugagg.....                                                                                    | 3    | 1 | seq |
| .....aggccauggGaguuugagg.....                                                                                    | 17   | 1 | seq |
| .....aggccauggaGguuugagg.....                                                                                    | 9    | 1 | seq |
| .....aggccauggaaguuuCGg.....                                                                                     | 2    | 1 | seq |
| .....aggccaCggaaguuugagg.....                                                                                    | 7    | 1 | seq |
| .....aggccauggaaguuugagC.....                                                                                    | 35   | 1 | seq |
| .....aggcUauggaaguuugagg.....                                                                                    | 5    | 1 | seq |
| .....Nggccauggaaguuugagg.....                                                                                    | 5    | 1 | seq |
| .....aggccauggaaguuCGagg.....                                                                                    | 5    | 1 | seq |
| .....agUccauggaaguuugagg.....                                                                                    | 1    | 1 | seq |
| .....Gggccauggaaguuugagg.....                                                                                    | 14   | 1 | seq |
| .....aggccauggaaguuuUagg.....                                                                                    | 1    | 1 | seq |
| .....aggccauggaaguuCugaggc.....                                                                                  | 5    | 1 | seq |
| .....aggccaugAaaguuugaggc.....                                                                                   | 2    | 1 | seq |
| .....aggccauggaagAuugaggc.....                                                                                   | 5    | 1 | seq |
| .....aggGcauggaaguuugaggc.....                                                                                   | 1    | 1 | seq |
| .....aggccauggaaguuuAaggc.....                                                                                   | 1    | 1 | seq |
| .....aggccCuggaaguuugaggc.....                                                                                   | 1    | 1 | seq |
| .....aggccauggaaguuAugggc.....                                                                                   | 2    | 1 | seq |
| .....aggccauggGaguuugaggc.....                                                                                   | 27   | 1 | seq |
| .....Uggccauggaaguuugaggc.....                                                                                   | 3    | 1 | seq |
| .....aggccauggCaguuugaggc.....                                                                                   | 1    | 1 | seq |
| .....Gggccauggaaguuugaggc.....                                                                                   | 29   | 1 | seq |
| .....aggccauggaaguuAaggc.....                                                                                    | 1    | 1 | seq |
| .....aggccauggaGguuugaggc.....                                                                                   | 24   | 1 | seq |
| .....aggccauggaaguuCGaggc.....                                                                                   | 10   | 1 | seq |
| .....aggccauggaaguuGugaggc.....                                                                                  | 2    | 1 | seq |
| .....aggccaAaggaaguuugaggc.....                                                                                  | 1    | 1 | seq |
| .....aggccaugCaaguuugaggc.....                                                                                   | 1    | 1 | seq |

## Mature

## Star

augggacauuuuuuggaggccauagggaaguuuagggcuuuuacuguuuggggauuuuuuuauggccuugaauuacaucaauccuuuuugagcuugauuuucauaagcacg

|                                    |      |   |     |
|------------------------------------|------|---|-----|
| .....aggccaGggaaguuuagggc.....     | 1    | 1 | seq |
| .....aggccauggaagCuugaggc.....     | 17   | 1 | seq |
| .....aggccauggaaguuuCaaggc.....    | 1    | 1 | seq |
| .....aggccauggaCguuugaggc.....     | 2    | 1 | seq |
| .....aggccauggaagGuugaggc.....     | 2    | 1 | seq |
| .....aggccauggaaguuuUaggc.....     | 3    | 1 | seq |
| .....aggccauggaaguuuagCgc.....     | 2    | 1 | seq |
| .....Nggccauggaaguuuagggc.....     | 7    | 1 | seq |
| .....aggccauggaUguuugaggc.....     | 6    | 1 | seq |
| .....Cggccauggaaguuuagggc.....     | 5    | 1 | seq |
| .....aggccauggaaguuuagggc.....     | 6437 | 0 | seq |
| .....aggccauCgaaguuuagggc.....     | 2    | 1 | seq |
| .....aggccUuggaaguuuagggc.....     | 2    | 1 | seq |
| .....aggccauggaaguuuagagCc.....    | 19   | 1 | seq |
| .....aggccauggaaguuuagagAc.....    | 16   | 1 | seq |
| .....agCccauggaaguuuagggc.....     | 1    | 1 | seq |
| .....aggccauggaaguuuagagUc.....    | 1    | 1 | seq |
| .....aggccaCggaaguuuagggc.....     | 8    | 1 | seq |
| .....aggccUauggaaguuuagggc.....    | 6    | 1 | seq |
| .....aggccauggaaguuuagagCgc.....   | 1    | 1 | seq |
| .....aggccauggaaguuuagagCcu.....   | 1    | 1 | seq |
| .....Uggccauggaaguuuagggcu.....    | 1    | 1 | seq |
| .....aggccauggaaguuuagggcu.....    | 161  | 0 | seq |
| .....aggccauggaaguuuagaggAu.....   | 1    | 1 | seq |
| .....aggccauggGaguuuagggcu.....    | 2    | 1 | seq |
| .....aggccauggaaguuuagaggcC.....   | 64   | 1 | seq |
| .....aggccauggaaguuuagaggcu.....   | 1    | 1 | seq |
| .....aggccauggaaguuuagggcu.....    | 7    | 1 | seq |
| .....aggccauggaaguuuagggcG.....    | 660  | 1 | seq |
| .....aggccauggaagCuugaggcu.....    | 1    | 1 | seq |
| .....Nggccauggaaguuuagggcu.....    | 1    | 1 | seq |
| .....aggccauggaaguuuagaggUu.....   | 1    | 1 | seq |
| .....aggccauggaaguuuagggcu.....    | 1    | 1 | seq |
| .....Gggccauggaaguuuagggcu.....    | 2    | 1 | seq |
| .....aggccauggaaguuuagggcuA.....   | 2    | 1 | seq |
| .....aggccauggaaguuuagggcCu.....   | 2    | 1 | seq |
| .....aggccauggaaguuuagggcAu.....   | 21   | 1 | seq |
| .....aggccauggaaguuuagggcuAu.....  | 2    | 1 | seq |
| .....aggccauggaaguuuagggcuuG.....  | 1    | 1 | seq |
| .....aggccauggaaguuuagggcAu.....   | 2    | 1 | seq |
| .....aggccauggaaguuuagggcuAua..... | 2    | 1 | seq |
| .....ggccaAgaaguuuagag.....        | 1    | 1 | seq |
| .....ggccauggaaguuuUag.....        | 1    | 1 | seq |
| .....ggccauggaaguuuagag.....       | 3    | 1 | seq |
| .....ggccauggaaguuuagag.....       | 1    | 1 | seq |
| .....ggccauggGaguuuagag.....       | 1    | 1 | seq |
| .....ggGcauggaaguuuagag.....       | 2    | 1 | seq |
| .....ggccauggaaguuuagag.....       | 418  | 0 | seq |
| .....ggccauggUaguuuagag.....       | 1    | 1 | seq |
| .....ggccauggaagGuuagag.....       | 2    | 1 | seq |
| .....ggccauggaaguuuagac.....       | 1    | 1 | seq |
| .....ggccaugAaaguuuagagg.....      | 1    | 1 | seq |
| .....ggccauggaaguuuagagg.....      | 5    | 1 | seq |
| .....ggccauggaaguuuagagg.....      | 2    | 1 | seq |
| .....Ngccauggaaguuuagagg.....      | 1    | 1 | seq |
| .....ggccauggaaguuuagagUg.....     | 1    | 1 | seq |
| .....gUccauggaaguuuagagg.....      | 1    | 1 | seq |
| .....ggccauggaaguuuagagg.....      | 1    | 1 | seq |
| .....ggccauggaagGuuagagg.....      | 1    | 1 | seq |
| .....ggccaCggaaguuuagagg.....      | 4    | 1 | seq |
| .....ggccauggGaguuuagagg.....      | 5    | 1 | seq |
| .....Cgccauggaaguuuagagg.....      | 1    | 1 | seq |
| .....ggccauggaaguuuagagg.....      | 3    | 1 | seq |
| .....ggccauggaaguuuagagg.....      | 1223 | 0 | seq |
| .....ggccauggaaguuuagagC.....      | 3    | 1 | seq |
| .....ggccauggaaguuuagagg.....      | 1    | 1 | seq |
| .....ggccaAgaaguuuagagg.....       | 1    | 1 | seq |
| .....ggGcauggaaguuuagagg.....      | 1    | 1 | seq |
| .....ggccauggGaguuuagagg.....      | 7    | 1 | seq |
| .....ggccauggaaguuuagagg.....      | 1023 | 0 | seq |

## Mature

## Star

augggacauuuuuuggaggccaaggaaguuuagaggcuuuuacuguuuggggauuuuuuuauaggccuugaauuacaucaauccuuuuuguagcuugauuucauaagcacg

|                                   |      |   |     |
|-----------------------------------|------|---|-----|
| .....ggccauggaagAuugaggc.....     | 2    | 1 | seq |
| .....ggccauggaagGuugaggc.....     | 1    | 1 | seq |
| .....ggccauggaagGuuugaggc.....    | 4    | 1 | seq |
| .....ggccauggaaguuCgaggc.....     | 2    | 1 | seq |
| .....ggccaAggaaguuugaggc.....     | 1    | 1 | seq |
| .....ggccauggaaguuugagCc.....     | 5    | 1 | seq |
| .....ggccaCggaaguuugaggc.....     | 3    | 1 | seq |
| .....ggccauggaaguuugCggc.....     | 1    | 1 | seq |
| .....ggccaugAaaguuugaggc.....     | 3    | 1 | seq |
| .....ggccauggaaguuAgaggc.....     | 1    | 1 | seq |
| .....Ngccauggaaguuugaggc.....     | 1    | 1 | seq |
| .....ggccauggaUGuuugaggc.....     | 3    | 1 | seq |
| .....ggccauggaaguuGgaggc.....     | 1    | 1 | seq |
| .....gUccauggaaguuugaggc.....     | 1    | 1 | seq |
| .....ggccauggaaguuugagAc.....     | 2    | 1 | seq |
| .....ggccauggaaguuCugaggc.....    | 3    | 1 | seq |
| .....ggccauggaaguuugaggcu.....    | 17   | 0 | seq |
| .....ggccauggaaguuugCggcu.....    | 1    | 1 | seq |
| .....ggccauggaaguuugaggcG.....    | 64   | 1 | seq |
| .....ggUcauggaaguuugaggcu.....    | 1    | 1 | seq |
| .....ggccauggaaguuugaggcC.....    | 1    | 1 | seq |
| .....ggccauggaaguuugaggcAu.....   | 4    | 1 | seq |
| .....ggccauggaaguuugaggcuAua..... | 1    | 1 | seq |
| .....ggccauggaaguuugaggcAuua..... | 1    | 1 | seq |
| .....gccauggaaguuugagC.....       | 1    | 1 | seq |
| .....gccauggaGguuugagg.....       | 1    | 1 | seq |
| .....gccauggaUGuuugagg.....       | 2    | 1 | seq |
| .....gccauggaaguuugagg.....       | 479  | 0 | seq |
| .....gccauggaaguuCgagg.....       | 2    | 1 | seq |
| .....gccauggaagGuuugagg.....      | 2    | 1 | seq |
| .....gccaCggaaguuugagg.....       | 2    | 1 | seq |
| .....gccauggaCguuugagg.....       | 1    | 1 | seq |
| .....gccaAggaaguuugagg.....       | 1    | 1 | seq |
| .....gGcauggaaguuugagg.....       | 1    | 1 | seq |
| .....gccauggaaguuugCgg.....       | 1    | 1 | seq |
| .....gccauggaaguuuUaggc.....      | 1    | 1 | seq |
| .....gccauggaaguuugagCc.....      | 1    | 1 | seq |
| .....gcUauggaaguuugaggc.....      | 2    | 1 | seq |
| .....gccauggaaguuugaggc.....      | 94   | 0 | seq |
| .....gGcauggaaguuugaggc.....      | 2    | 1 | seq |
| .....gccauggGaguugaggc.....       | 1    | 1 | seq |
| .....gccauggaaguuugaggcG.....     | 23   | 1 | seq |
| .....gccauggaaguuugaggcu.....     | 3    | 0 | seq |
| .....gccauggaaUuuugaggcu.....     | 1    | 1 | seq |
| .....gccauggaaguuugaggcAu.....    | 1    | 1 | seq |
| .....gccauggaaguuugaggcuGu.....   | 1    | 1 | seq |
| .....ccauggaaguuugagCc.....       | 4    | 1 | seq |
| .....ccauggaaguuugaggc.....       | 1167 | 0 | seq |
| .....ccauggaaguGugaggc.....       | 1    | 1 | seq |
| .....ccauggaaguCugaggc.....       | 2    | 1 | seq |
| .....ccaAggaaguuugaggc.....       | 1    | 1 | seq |
| .....ccauggaaguuCgaggc.....       | 1    | 1 | seq |
| .....ccauggaagCuugaggc.....       | 1    | 1 | seq |
| .....ccauggaCguuugaggc.....       | 1    | 1 | seq |
| .....Gcauggaaguuugaggc.....       | 3    | 1 | seq |
| .....ccauggGaguugaggc.....        | 3    | 1 | seq |
| .....ccauggaaguuugaCgc.....       | 2    | 1 | seq |
| .....ccaugAaaguuugaggc.....       | 1    | 1 | seq |
| .....ccauggaaguuugCggc.....       | 2    | 1 | seq |
| .....ccaCggaaguuugaggc.....       | 3    | 1 | seq |
| .....ccauggUaguugaggc.....        | 1    | 1 | seq |
| .....ccauggaaguCugaggcu.....      | 1    | 1 | seq |
| .....ccauggaaguuugaggcG.....      | 123  | 1 | seq |
| .....ccauggaaguuugaggcu.....      | 25   | 0 | seq |
| .....ccauggaaguuugaggcC.....      | 8    | 1 | seq |
| .....ccaCggaaguuugaggcu.....      | 1    | 1 | seq |
| .....ccauggaaguCugaggcuu.....     | 1    | 1 | seq |
| .....ccauggaaguuugaggcuG.....     | 1    | 1 | seq |
| .....ccauggaaguuugaggcuGu.....    | 1    | 1 | seq |
| .....cauggaaguuugaggcu.....       | 18   | 0 | seq |

Mature

Star

|                                                                                                               |    |   |     |
|---------------------------------------------------------------------------------------------------------------|----|---|-----|
| augggacauuuuuuggaggccauggaaguuugaggcuuuuacuguuugggauuuuuuuauggccuugaaauacaaucaauccuuuuuguagcuugauuucauaagcacg |    |   |     |
| .....cauggaaguuugaggcG.....                                                                                   | 63 | 1 | seq |
| .....cauggaaguuugaggcC.....                                                                                   | 7  | 1 | seq |
| .....cauggaaguuugaggcAu.....                                                                                  | 1  | 1 | seq |
| .....cauggaaguuugaggcuC.....                                                                                  | 1  | 1 | seq |
| .....auggaaguuugaggcuG.....                                                                                   | 1  | 1 | seq |
| .....auggaaguuugaggcAu.....                                                                                   | 1  | 1 | seq |
| .....auggaaguuugaggcuC.....                                                                                   | 1  | 1 | seq |

A diagram of a complex RNA secondary structure. The sequence starts at the 5' end with U-G-C-G-A. This is followed by a stem-loop where G pairs with C, A with U, and C with G. The main body of the molecule consists of several stems connected by loops. One stem has G-C, A-U, G-C, G-C, U-A, and A-C base pairs. Another stem has C-G, G-C, G-C, G-C, G-C, and U-A base pairs. The sequence ends at the 3' end with U-A-C-U. Various colors are used to highlight different regions: red for the first loop, purple for the middle stems, blue for the last stem, and orange for the final nucleotides.

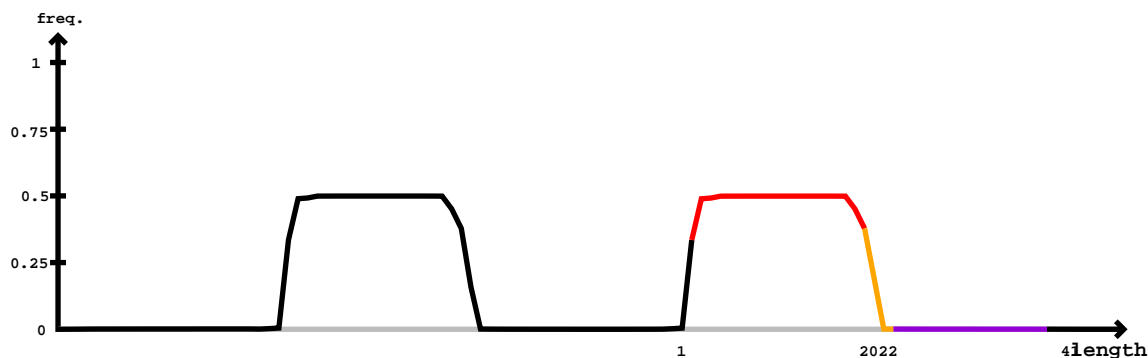[illegible]

# Mature Star

|                                                                                                                       |      |   |     |
|-----------------------------------------------------------------------------------------------------------------------|------|---|-----|
| acgguagagcgcgcuuugcaugcgagagguacggggguucgauaccccgcaunnnngcuuugcaugcgagagguacggggguucga <u>uaccccgcaucccaugauguguc</u> |      |   |     |
| .....uugcaugcgagagguacggggguu.....                                                                                    | 2    | 0 | seq |
| .....ugcUugcgagagguacggggguuc.....                                                                                    | 2    | 1 | seq |
| .....ugcaugcgagagguacggggguuc.....                                                                                    | 2    | 0 | seq |
| .....ugcaugcgagagguacggggguucg.....                                                                                   | 4    | 0 | seq |
| .....ugcUugcgagagguacggggguucg.....                                                                                   | 2    | 1 | seq |
| .....gcUugcgagagguacggg.....                                                                                          | 2    | 1 | seq |
| .....gcaugcgagagguacggg.....                                                                                          | 2    | 0 | seq |
| .....gcaugcgagagguacggggguu.....                                                                                      | 2    | 0 | seq |
| .....gcUugcgagagguacggggguu.....                                                                                      | 2    | 1 | seq |
| .....gcUugcgagagguacggggguuc.....                                                                                     | 4    | 1 | seq |
| .....Ccaugcgagagguacggggguucg.....                                                                                    | 2    | 1 | seq |
| .....gcaugcgagagguacggggguucg.....                                                                                    | 6    | 0 | seq |
| .....cUugcgagagguacggg.....                                                                                           | 6    | 1 | seq |
| .....caugcgagagguacggg.....                                                                                           | 2    | 0 | seq |
| .....caugcgagagguacgggg.....                                                                                          | 6    | 0 | seq |
| .....cUugcgagagguacgggg.....                                                                                          | 4    | 1 | seq |
| .....caugcgagagUuacgggg.....                                                                                          | 2    | 1 | seq |
| .....cCugcgagagguacgggg.....                                                                                          | 2    | 1 | seq |
| .....cUugcgagagguacgggggu.....                                                                                        | 6    | 1 | seq |
| .....caugcgagUgguaacgggggu.....                                                                                       | 2    | 1 | seq |
| .....caugcgagagguacgggggu.....                                                                                        | 10   | 0 | seq |
| .....caugcgagagguacggggguu.....                                                                                       | 6    | 0 | seq |
| .....cUugcgagagguacggggguu.....                                                                                       | 10   | 1 | seq |
| .....caugcgagagguacggggguuc.....                                                                                      | 16   | 0 | seq |
| .....cUugcgagagguacggggguuc.....                                                                                      | 30   | 1 | seq |
| .....cCugcgagagguacggggguuc.....                                                                                      | 4    | 1 | seq |
| .....caugcgagagguacggggguucg.....                                                                                     | 20   | 0 | seq |
| .....caugcgagagguacggggguucU.....                                                                                     | 2    | 1 | seq |
| .....cUugcgagagguacggggguucg.....                                                                                     | 42   | 1 | seq |
| .....cCugcgagagguacggggguucg.....                                                                                     | 8    | 1 | seq |
| .....caugcgagagguacggggguucga.....                                                                                    | 2    | 0 | seq |
| .....cUugcgagagguacggggguucgau.....                                                                                   | 2    | 1 | seq |
| .....augcgagagguacgggg.....                                                                                           | 8    | 0 | seq |
| .....augcgagUgguaacgggggu.....                                                                                        | 2    | 1 | seq |
| .....augcgagagguacgggggu.....                                                                                         | 4    | 0 | seq |
| .....Uugcgagagguacgggggu.....                                                                                         | 4    | 1 | seq |
| .....Cugcgagagguacggggguu.....                                                                                        | 6    | 1 | seq |
| .....Uugcgagagguacggggguu.....                                                                                        | 6    | 1 | seq |
| .....augcgagagCuacggggguuc.....                                                                                       | 2    | 1 | seq |
| .....Cugcgagagguacggggguuc.....                                                                                       | 34   | 1 | seq |
| .....augcgagagguacggggguuc.....                                                                                       | 18   | 0 | seq |
| .....Uugcgagagguacggggguuc.....                                                                                       | 38   | 1 | seq |
| .....Uugcgagagguacggggguucg.....                                                                                      | 64   | 1 | seq |
| .....Cugcgagagguacggggguucg.....                                                                                      | 24   | 1 | seq |
| .....augcgagagguacggggguucg.....                                                                                      | 24   | 0 | seq |
| .....Nugcgagagguacggggguucg.....                                                                                      | 2    | 1 | seq |
| .....augcgagaggAacggggguucg.....                                                                                      | 2    | 1 | seq |
| .....ugcgagagguacgggggu.....                                                                                          | 4326 | 0 | seq |
| .....ugcgagagguacgCgggu.....                                                                                          | 6    | 1 | seq |
| .....uUcgagagguacgggggu.....                                                                                          | 2    | 1 | seq |
| .....ugcgagagNuacgggggu.....                                                                                          | 2    | 1 | seq |
| .....ugcgagagUuacgggggu.....                                                                                          | 2    | 1 | seq |
| .....ugcgagUgguaacgggggu.....                                                                                         | 4    | 1 | seq |
| .....ugcgagagguaAggggu.....                                                                                           | 2    | 1 | seq |
| .....ugcgagagguacggUgu.....                                                                                           | 4    | 1 | seq |
| .....ugcgagagguUcgggggu.....                                                                                          | 6    | 1 | seq |
| .....uAcgagagguacgggggu.....                                                                                          | 10   | 1 | seq |
| .....Ngcgagagguacgggggu.....                                                                                          | 10   | 1 | seq |
| .....ugcgagagguacgUgggu.....                                                                                          | 4    | 1 | seq |
| .....ugcgagagguacUgggu.....                                                                                           | 4    | 1 | seq |
| .....ugcgagaUguacgggggu.....                                                                                          | 2    | 1 | seq |
| .....ugcgagagCuacgggggu.....                                                                                          | 2    | 1 | seq |
| .....ugcgagagguacgggCu.....                                                                                           | 8    | 1 | seq |
| .....Ggcgagagguacgggggu.....                                                                                          | 6    | 1 | seq |
| .....ugcgaUagguaacgggggu.....                                                                                         | 2    | 1 | seq |
| .....uCcagagagguacgggggu.....                                                                                         | 2    | 1 | seq |
| .....ugcgagaggAacgggggu.....                                                                                          | 2    | 1 | seq |
| .....ugcUagagguacgggggu.....                                                                                          | 4    | 1 | seq |
| .....ugcgagagguacgggggC.....                                                                                          | 704  | 1 | seq |
| .....ugcgagagguGcgggggu.....                                                                                          | 14   | 1 | seq |

# Mature Star

|                                                                                                                       |       |   |     |
|-----------------------------------------------------------------------------------------------------------------------|-------|---|-----|
| acgguagagcgcgcuuugcaugcgagagguacggggguucgauaccccgaunnnngcuuugcaugcgagagguacggggguucga <u>uacccccgaucuccaugauguguc</u> |       |   |     |
| .....ugcgagagguacggggguu.....                                                                                         | 4182  | 0 | seq |
| .....ugcgagagguacggggguu.....                                                                                         | 4     | 1 | seq |
| .....uAcgagagguacggggguu.....                                                                                         | 4     | 1 | seq |
| .....ugcgagagguUcgggguu.....                                                                                          | 4     | 1 | seq |
| .....Ngcgagagguacggggguu.....                                                                                         | 4     | 1 | seq |
| .....ugcgagagguacggggCu.....                                                                                          | 50    | 1 | seq |
| .....ugcgagagguacUggguu.....                                                                                          | 4     | 1 | seq |
| .....Ggcgagagguacggggguu.....                                                                                         | 6     | 1 | seq |
| .....ugcgagagguAacggggguu.....                                                                                        | 2     | 1 | seq |
| .....ugcgagagguacggUguu.....                                                                                          | 2     | 1 | seq |
| .....ugcgagaUguacggggguu.....                                                                                         | 2     | 1 | seq |
| .....ugcgagagguGcgggguu.....                                                                                          | 14    | 1 | seq |
| .....ugcgagUgguaacggggguu.....                                                                                        | 2     | 1 | seq |
| .....ugcgagaAguacggggguu.....                                                                                         | 4     | 1 | seq |
| .....ugcgagagguacggggguA.....                                                                                         | 68    | 1 | seq |
| .....ugcUagagguacggggguu.....                                                                                         | 2     | 1 | seq |
| .....ugcgagagguacggggguC.....                                                                                         | 682   | 1 | seq |
| .....ugcgagagguacggggguuc.....                                                                                        | 14250 | 0 | seq |
| .....ugcgaCagguacggggguuc.....                                                                                        | 4     | 1 | seq |
| .....Ggcgagagguacggggguuc.....                                                                                        | 26    | 1 | seq |
| .....ugcgagagguAacggggguuc.....                                                                                       | 2     | 1 | seq |
| .....ugcgagaAguacggggguuc.....                                                                                        | 2     | 1 | seq |
| .....ugcgagagguacCggguuc.....                                                                                         | 2     | 1 | seq |
| .....uUcgagagguacggggguuc.....                                                                                        | 2     | 1 | seq |
| .....ugcgagagguacggUguuc.....                                                                                         | 4     | 1 | seq |
| .....ugcgagagguacggggguuA.....                                                                                        | 206   | 1 | seq |
| .....ugcgagagguacggggguGc.....                                                                                        | 34    | 1 | seq |
| .....ugcgagagguacgUggguuc.....                                                                                        | 6     | 1 | seq |
| .....ugcgagagCuacggggguuc.....                                                                                        | 2     | 1 | seq |
| .....uAcgagagguacggggguuc.....                                                                                        | 30    | 1 | seq |
| .....ugcUagagguacggggguuc.....                                                                                        | 6     | 1 | seq |
| .....ugcgagagguacgCggguuc.....                                                                                        | 2     | 1 | seq |
| .....Ngcgagagguacggggguuc.....                                                                                        | 18    | 1 | seq |
| .....ugcgagagguGcgggguuc.....                                                                                         | 36    | 1 | seq |
| .....ugGgagagguacggggguuc.....                                                                                        | 4     | 1 | seq |
| .....ugcgagagguCcgggguuc.....                                                                                         | 2     | 1 | seq |
| .....ugcgagagguacgggCuuc.....                                                                                         | 2     | 1 | seq |
| .....ugcgagUgguaacggggguuc.....                                                                                       | 22    | 1 | seq |
| .....ugcgagagguacggggguCc.....                                                                                        | 132   | 1 | seq |
| .....ugcgagagguacUggguuc.....                                                                                         | 4     | 1 | seq |
| .....ugcgCgagguacggggguuc.....                                                                                        | 4     | 1 | seq |
| .....ugcgaUagguacggggguuc.....                                                                                        | 2     | 1 | seq |
| .....ugcgagagguUcgggguuc.....                                                                                         | 2     | 1 | seq |
| .....ugcgagagguacggggCuuc.....                                                                                        | 64    | 1 | seq |
| .....ugcgagagguacggggguAc.....                                                                                        | 2     | 1 | seq |
| .....ugcgagagguacggggguuc.....                                                                                        | 2     | 1 | seq |
| .....ugcgagagguUcgggguucg.....                                                                                        | 12    | 1 | seq |
| .....ugGgagagguacggggguucg.....                                                                                       | 2     | 1 | seq |
| .....ugcgagagguacggggCuucg.....                                                                                       | 28    | 1 | seq |
| .....ugcgagagguacggUguucg.....                                                                                        | 6     | 1 | seq |
| .....ugcgagagguacggggguCc.....                                                                                        | 20    | 1 | seq |
| .....ugcgagagguacggggguAcg.....                                                                                       | 4     | 1 | seq |
| .....ugcgagCgguacggggguucg.....                                                                                       | 2     | 1 | seq |
| .....ugcgagagguGcgggguucg.....                                                                                        | 22    | 1 | seq |
| .....ugcgagagguacggggguucg.....                                                                                       | 4     | 1 | seq |
| .....ugcgaUagguacggggguucg.....                                                                                       | 4     | 1 | seq |
| .....uAcgagagguacggggguucg.....                                                                                       | 18    | 1 | seq |
| .....ugcUagagguacggggguucg.....                                                                                       | 2     | 1 | seq |
| .....Ggcgagagguacggggguucg.....                                                                                       | 10    | 1 | seq |
| .....ugcgagagCuacggggguucg.....                                                                                       | 2     | 1 | seq |
| .....ugcgagaAguacggggguucg.....                                                                                       | 4     | 1 | seq |
| .....ugcgagagguAacggggguucg.....                                                                                      | 10    | 1 | seq |
| .....ugcgagUgguaacggggguucg.....                                                                                      | 18    | 1 | seq |
| .....ugcgagagguacUggguucg.....                                                                                        | 10    | 1 | seq |
| .....uCcagagguacggggguucg.....                                                                                        | 2     | 1 | seq |
| .....ugAgagagguacggggguucg.....                                                                                       | 4     | 1 | seq |
| .....ugcgagagguacggggguucU.....                                                                                       | 136   | 1 | seq |
| .....ugcgagagguacggggguGcg.....                                                                                       | 16    | 1 | seq |
| .....Ngcgagagguacggggguucg.....                                                                                       | 6     | 1 | seq |
| .....ugcgagagguacggggguuAg.....                                                                                       | 12    | 1 | seq |

# Mature Star

|                                                                                                                        |       |   |     |
|------------------------------------------------------------------------------------------------------------------------|-------|---|-----|
| acgguagagcgcgcuuugcaugcgagagguacggggguucgauaccccgcaunnnngcuuugcaugcgagagguacggggguucga <u>uaccccgcaucuccaugauguguc</u> |       |   |     |
| .....ugcgagagguacggggguucg.....                                                                                        | 10064 | 0 | seq |
| .....ugcgagagguacgAgguucg.....                                                                                         | 6     | 1 | seq |
| .....ugcgagagguacggggguAcga.....                                                                                       | 2     | 1 | seq |
| .....ugcgagagguacggggguCa.....                                                                                         | 2     | 1 | seq |
| .....ugcgagagguacgggggCucga.....                                                                                       | 2     | 1 | seq |
| .....ugcgagagguacggggguucga.....                                                                                       | 6     | 0 | seq |
| .....ugcgagagguacgAgguucga.....                                                                                        | 2     | 1 | seq |
| .....ugcgagagguacggggguucgau.....                                                                                      | 2     | 0 | seq |
| .....ugcgagagguacggggguucgGu.....                                                                                      | 4     | 1 | seq |
| .....ugcgagagguacggggguucgUuaccccgca.....                                                                              | 4     | 1 | seq |
| .....Ncgagagguacggggguu.....                                                                                           | 4     | 1 | seq |
| .....Ucgagagguacggggguu.....                                                                                           | 6     | 1 | seq |
| .....gcgagagguacggggguA.....                                                                                           | 48    | 1 | seq |
| .....gcgagagguGcgggguu.....                                                                                            | 8     | 1 | seq |
| .....gcgagagguacggggguC.....                                                                                           | 386   | 1 | seq |
| .....gcgagagguacUggguu.....                                                                                            | 2     | 1 | seq |
| .....gcgagagguacggggguu.....                                                                                           | 2298  | 0 | seq |
| .....gcgagagguacgggggCu.....                                                                                           | 28    | 1 | seq |
| .....gcgagUggguacggggguu.....                                                                                          | 2     | 1 | seq |
| .....gcgagagCuacggggguu.....                                                                                           | 2     | 1 | seq |
| .....gcgagaggaAcggggguu.....                                                                                           | 2     | 1 | seq |
| .....Acgagagguacggggguu.....                                                                                           | 6     | 1 | seq |
| .....gcgagagUuacggggguuc.....                                                                                          | 2     | 1 | seq |
| .....gcgagagguacgCguuc.....                                                                                            | 2     | 1 | seq |
| .....gcgagagguGcgggguuc.....                                                                                           | 12    | 1 | seq |
| .....gcgagagguUcgggguuc.....                                                                                           | 2     | 1 | seq |
| .....gcgagagguacggggCuuc.....                                                                                          | 2     | 1 | seq |
| .....gcgagagguacggUguuc.....                                                                                           | 4     | 1 | seq |
| .....Ucgagagguacggggguuc.....                                                                                          | 4     | 1 | seq |
| .....gcgCgagguacggggguuc.....                                                                                          | 2     | 1 | seq |
| .....Ccagagguacggggguuc.....                                                                                           | 2     | 1 | seq |
| .....Acgagagguacggggguuc.....                                                                                          | 24    | 1 | seq |
| .....gcgagagguacUggguuc.....                                                                                           | 2     | 1 | seq |
| .....gcgagagguacggggguCc.....                                                                                          | 70    | 1 | seq |
| .....gcgagagguacggggguuA.....                                                                                          | 82    | 1 | seq |
| .....gcgagagCuacggggguuc.....                                                                                          | 2     | 1 | seq |
| .....gcgagagguacggggguGc.....                                                                                          | 14    | 1 | seq |
| .....gcgagUggguacggggguuc.....                                                                                         | 12    | 1 | seq |
| .....gcgagCggguacggggguuc.....                                                                                         | 6     | 1 | seq |
| .....gcgagagguacggCguuc.....                                                                                           | 2     | 1 | seq |
| .....Ncgagagguacggggguuc.....                                                                                          | 12    | 1 | seq |
| .....gcgagagguacggggCuuc.....                                                                                          | 48    | 1 | seq |
| .....gGgagagguacggggguuc.....                                                                                          | 2     | 1 | seq |
| .....gcgagagguacggggguuc.....                                                                                          | 7948  | 0 | seq |
| .....gcgagaAguacggggguuc.....                                                                                          | 4     | 1 | seq |
| .....gcgagagguacCggguuc.....                                                                                           | 2     | 1 | seq |
| .....gcgagCggguacggggguucg.....                                                                                        | 2     | 1 | seq |
| .....gcgagagguUcgggguucg.....                                                                                          | 2     | 1 | seq |
| .....gcgagUggguacggggguucg.....                                                                                        | 4     | 1 | seq |
| .....Ncgagagguacggggguucg.....                                                                                         | 2     | 1 | seq |
| .....Acgagagguacggggguucg.....                                                                                         | 12    | 1 | seq |
| .....gcgagagguacggggguCc.....                                                                                          | 22    | 1 | seq |
| .....Ucgagagguacggggguucg.....                                                                                         | 6     | 1 | seq |
| .....Ccagagguacggggguucg.....                                                                                          | 2     | 1 | seq |
| .....gcgagagguGcgggguucg.....                                                                                          | 16    | 1 | seq |
| .....gcgagagguacggggguGcg.....                                                                                         | 6     | 1 | seq |
| .....gcgagagguacgggggCucg.....                                                                                         | 16    | 1 | seq |
| .....gcgagagguacggggguucU.....                                                                                         | 68    | 1 | seq |
| .....gcUagagguacggggguucg.....                                                                                         | 8     | 1 | seq |
| .....gcgagaAguacggggguucg.....                                                                                         | 2     | 1 | seq |
| .....gcgagagguacggggguucg.....                                                                                         | 5312  | 0 | seq |
| .....gcgagagguacUggguucg.....                                                                                          | 2     | 1 | seq |
| .....gcgagagguacggggguuAg.....                                                                                         | 4     | 1 | seq |
| .....gcgagaggaAcggggguucg.....                                                                                         | 8     | 1 | seq |
| .....gcgagagguacggggguucgG.....                                                                                        | 2     | 1 | seq |
| .....gcgagagguacggggguucGC.....                                                                                        | 2     | 1 | seq |
| .....gcgagagguacggggguucCa.....                                                                                        | 2     | 1 | seq |
| .....gcgagagguacggggguucgau.....                                                                                       | 4     | 0 | seq |
| .....gcgagagguacggggguucgUu.....                                                                                       | 4     | 1 | seq |
| .....gcgagagguacggggguucgCu.....                                                                                       | 2     | 1 | seq |



# Mature Star

|                                                                                                                       |     |   |     |
|-----------------------------------------------------------------------------------------------------------------------|-----|---|-----|
| acgguagagcgcgcuuugcaugcgagagguacggggguucgauaccccgcaunnngcuuugcaugcgagagguacggggguucga <u>uacccccgcaucccaugauguguc</u> |     |   |     |
| .....gcgagagguacggggguucgaGa.....                                                                                     | 2   | 1 | seq |
| .....gcgagagguacggggguucGUacccccgca.....                                                                              | 4   | 1 | seq |
| .....cgagagguacggggguucGUacccccgca.....                                                                               | 2   | 1 | seq |
| .....cgagagguacggggguuA.....                                                                                          | 2   | 1 | seq |
| .....cUagagguacggggguuc.....                                                                                          | 2   | 1 | seq |
| .....cgagagguUcgggguuc.....                                                                                           | 2   | 1 | seq |
| .....cgagagguacggggguuc.....                                                                                          | 182 | 0 | seq |
| .....Ggagagguacggggguuc.....                                                                                          | 2   | 1 | seq |
| .....cgagUggguacggggguuc.....                                                                                         | 2   | 1 | seq |
| .....Agagagguacggggguucg.....                                                                                         | 2   | 1 | seq |
| .....cgagagguacggggguucg.....                                                                                         | 106 | 0 | seq |
| .....cgagagguacggggguucU.....                                                                                         | 2   | 1 | seq |
| .....cgagagguacggggguuAg.....                                                                                         | 2   | 1 | seq |
| .....cgagagguacggggguCcG.....                                                                                         | 2   | 1 | seq |
| .....gagagguacggggguuAg.....                                                                                          | 4   | 1 | seq |
| .....gagagguacggggGucg.....                                                                                           | 4   | 1 | seq |
| .....gagagguacggggguucg.....                                                                                          | 728 | 0 | seq |
| .....gagagguacggggguGcg.....                                                                                          | 2   | 1 | seq |
| .....gagagguacggggguCcG.....                                                                                          | 2   | 1 | seq |
| .....gaUagguacggggguucg.....                                                                                          | 2   | 1 | seq |
| .....gagagguGcgggguucg.....                                                                                           | 2   | 1 | seq |
| .....Cagagguacggggguucg.....                                                                                          | 2   | 1 | seq |
| .....gagagguacgAgguucg.....                                                                                           | 2   | 1 | seq |
| .....agagguacggggguucgC.....                                                                                          | 2   | 1 | seq |
| .....agagguacggggguucga.....                                                                                          | 6   | 0 | seq |
| .....agagguacggggguucgG.....                                                                                          | 2   | 1 | seq |
| .....agagguacggggguucgau.....                                                                                         | 2   | 0 | seq |
| .....agagguacggggguucGUuac.....                                                                                       | 2   | 1 | seq |
| .....gagguacggggguucgaC.....                                                                                          | 2   | 1 | seq |
| .....gagguacggggguucGUua.....                                                                                         | 2   | 1 | seq |
| .....gagguacggggguucGUuac.....                                                                                        | 2   | 1 | seq |
| .....gagguacggggguucGUuacc.....                                                                                       | 2   | 1 | seq |
| .....gagguacggggguucGUuaccc.....                                                                                      | 2   | 1 | seq |
| .....agguacggggguucgaAa.....                                                                                          | 2   | 1 | seq |
| .....guacggggguucGUuacccc.....                                                                                        | 2   | 1 | seq |
| .....uacggggguucGUuacccccgca.....                                                                                     | 2   | 1 | seq |
| .....gcuuugcaugcgagagGuacggggguu.....                                                                                 | 2   | 1 | seq |
| .....cuuugcaugcgagagguacggggguuc.....                                                                                 | 2   | 0 | seq |
| .....uuGgcaugcgagagguacggggg.....                                                                                     | 2   | 1 | seq |
| .....uugcaugcgagagguacgggggu.....                                                                                     | 4   | 0 | seq |
| .....uugcaugcgagagguacggggguu.....                                                                                    | 2   | 0 | seq |
| .....ugcaugcgagagguacggggguuc.....                                                                                    | 2   | 0 | seq |
| .....ugcUugcgagagguacggggguuc.....                                                                                    | 2   | 1 | seq |
| .....ugcaugcgagagguacggggguucg.....                                                                                   | 4   | 0 | seq |
| .....ugcUugcgagagguacggggguucg.....                                                                                   | 2   | 1 | seq |
| .....gcaugcgagagguacgggg.....                                                                                         | 2   | 0 | seq |
| .....gcUugcgagagguacgggg.....                                                                                         | 2   | 1 | seq |
| .....gcaugcgagagguacggggguu.....                                                                                      | 2   | 0 | seq |
| .....gcUugcgagagguacggggguu.....                                                                                      | 2   | 1 | seq |
| .....gcUugcgagagguacggggguuc.....                                                                                     | 4   | 1 | seq |
| .....gcaugcgagagguacggggguucg.....                                                                                    | 6   | 0 | seq |
| .....Ccaugcgagagguacggggguucg.....                                                                                    | 2   | 1 | seq |
| .....cUugcgagagguacgggg.....                                                                                          | 6   | 1 | seq |
| .....caugcgagagguacgggg.....                                                                                          | 2   | 0 | seq |
| .....cCugcgagagguacgggg.....                                                                                          | 2   | 1 | seq |
| .....caugcgagagguacgggg.....                                                                                          | 6   | 0 | seq |
| .....caugcgagagGUuacgggg.....                                                                                         | 2   | 1 | seq |
| .....cUugcgagagguacgggg.....                                                                                          | 4   | 1 | seq |
| .....cUugcgagagguacgggggu.....                                                                                        | 6   | 1 | seq |
| .....caugcgagagguacgggggu.....                                                                                        | 10  | 0 | seq |
| .....caugcgagUggguacgggggu.....                                                                                       | 2   | 1 | seq |
| .....cUugcgagagguacggggguu.....                                                                                       | 10  | 1 | seq |
| .....caugcgagagguacggggguu.....                                                                                       | 6   | 0 | seq |
| .....cCugcgagagguacggggguuc.....                                                                                      | 4   | 1 | seq |
| .....caugcgagagguacggggguuc.....                                                                                      | 16  | 0 | seq |
| .....cUugcgagagguacggggguuc.....                                                                                      | 30  | 1 | seq |
| .....caugcgagagguacggggguucU.....                                                                                     | 2   | 1 | seq |
| .....cCugcgagagguacggggguucg.....                                                                                     | 8   | 1 | seq |
| .....caugcgagagguacggggguucg.....                                                                                     | 20  | 0 | seq |
| .....cUugcgagagguacggggguucg.....                                                                                     | 42  | 1 | seq |

# Mature Star

|                                                                                                              |      |   |     |
|--------------------------------------------------------------------------------------------------------------|------|---|-----|
| acgguagagcgcgcuuugcaugcgagagguacggggguucgauaccccgaunnnngcuuugcaugcgagagguacggggguucgauaccccgaucuccaugauguguc |      |   |     |
| .....caugcgagagguacggggguucga.....                                                                           | 2    | 0 | seq |
| .....cUugcgagagguacggggguucgau.....                                                                          | 2    | 1 | seq |
| .....augcgagagguacggggg.....                                                                                 | 8    | 0 | seq |
| .....augcgagagguacgggggu.....                                                                                | 4    | 0 | seq |
| .....Uugcgagagguacgggggu.....                                                                                | 4    | 1 | seq |
| .....augcgagUggguacgggggu.....                                                                               | 2    | 1 | seq |
| .....Uugcgagagguacgggggu.....                                                                                | 6    | 1 | seq |
| .....Cugcgagagguacgggggu.....                                                                                | 6    | 1 | seq |
| .....augcgagagguacggggguuc.....                                                                              | 18   | 0 | seq |
| .....Cugcgagagguacggggguuc.....                                                                              | 34   | 1 | seq |
| .....augcgagagCuaaggguuc.....                                                                                | 2    | 1 | seq |
| .....Uugcgagagguacggggguuc.....                                                                              | 38   | 1 | seq |
| .....Cugcgagagguacggggguucg.....                                                                             | 24   | 1 | seq |
| .....augcgagaggAacggggguucg.....                                                                             | 2    | 1 | seq |
| .....Uugcgagagguacggggguucg.....                                                                             | 64   | 1 | seq |
| .....Nugcgagagguacggggguucg.....                                                                             | 2    | 1 | seq |
| .....augcgagagguacggggguucg.....                                                                             | 24   | 0 | seq |
| .....ugcgaUaggguacgggggu.....                                                                                | 2    | 1 | seq |
| .....ugcgagagCuaagggu.....                                                                                   | 2    | 1 | seq |
| .....ugcUaggguacgggggu.....                                                                                  | 4    | 1 | seq |
| .....ugcgagagguacUgggu.....                                                                                  | 4    | 1 | seq |
| .....ugcgagagguUcgggggu.....                                                                                 | 6    | 1 | seq |
| .....Ngcgagagguacgggggu.....                                                                                 | 10   | 1 | seq |
| .....ugcgagagguacgggggu.....                                                                                 | 4326 | 0 | seq |
| .....ugcgagUggguacgggggu.....                                                                                | 4    | 1 | seq |
| .....uUcgagagguacgggggu.....                                                                                 | 2    | 1 | seq |
| .....ugcgagagguacgCggu.....                                                                                  | 6    | 1 | seq |
| .....ugcgagaUguacgggggu.....                                                                                 | 2    | 1 | seq |
| .....Ggcgagagguacgggggu.....                                                                                 | 6    | 1 | seq |
| .....ugcgagagNuacgggggu.....                                                                                 | 2    | 1 | seq |
| .....ugcgagagguacgggCu.....                                                                                  | 8    | 1 | seq |
| .....ugcgagagguAagggu.....                                                                                   | 2    | 1 | seq |
| .....ugcgagagguacggggC.....                                                                                  | 704  | 1 | seq |
| .....ugcgagagguGcgggggu.....                                                                                 | 14   | 1 | seq |
| .....uCcagagagguacgggggu.....                                                                                | 2    | 1 | seq |
| .....ugcgagagguacgUgggu.....                                                                                 | 4    | 1 | seq |
| .....ugcgagagUuacgggggu.....                                                                                 | 2    | 1 | seq |
| .....ugcgagagguacggUgu.....                                                                                  | 4    | 1 | seq |
| .....ugcgagaggAacgggggu.....                                                                                 | 2    | 1 | seq |
| .....uAcgagagguacgggggu.....                                                                                 | 10   | 1 | seq |
| .....ugcgagagguacggggguA.....                                                                                | 68   | 1 | seq |
| .....ugcgagagguGcgggggu.....                                                                                 | 14   | 1 | seq |
| .....ugcgagagguacggggguC.....                                                                                | 682  | 1 | seq |
| .....ugcgagaUguacgggggu.....                                                                                 | 2    | 1 | seq |
| .....ugcgagagguacgggggu.....                                                                                 | 4182 | 0 | seq |
| .....ugcUaggguacgggggu.....                                                                                  | 2    | 1 | seq |
| .....ugcgagagUuacgggggu.....                                                                                 | 4    | 1 | seq |
| .....ugcgagagguacggggCu.....                                                                                 | 50   | 1 | seq |
| .....ugcgagagguacggUgu.....                                                                                  | 2    | 1 | seq |
| .....ugcgagagguUcgggggu.....                                                                                 | 4    | 1 | seq |
| .....ugcgagaggAacgggggu.....                                                                                 | 2    | 1 | seq |
| .....ugcgagagguacUgggu.....                                                                                  | 4    | 1 | seq |
| .....ugcgagaAguacgggggu.....                                                                                 | 4    | 1 | seq |
| .....ugcgagUggguacgggggu.....                                                                                | 2    | 1 | seq |
| .....Ngcgagagguacgggggu.....                                                                                 | 4    | 1 | seq |
| .....Ggcgagagguacgggggu.....                                                                                 | 6    | 1 | seq |
| .....uAcgagagguacgggggu.....                                                                                 | 4    | 1 | seq |
| .....Ggcgagagguacggggguuc.....                                                                               | 26   | 1 | seq |
| .....ugcgagagguacUggguuc.....                                                                                | 4    | 1 | seq |
| .....ugcgagagguacggggguCc.....                                                                               | 132  | 1 | seq |
| .....ugcgagagguacgCgguuc.....                                                                                | 2    | 1 | seq |
| .....uAcgagagguacggggguuc.....                                                                               | 30   | 1 | seq |
| .....ugcgagagguacggUguuc.....                                                                                | 4    | 1 | seq |
| .....ugcgaCaggguacggggguuc.....                                                                              | 4    | 1 | seq |
| .....ugcgagagguacggggCu.....                                                                                 | 64   | 1 | seq |
| .....ugcgCaggguacggggguuc.....                                                                               | 4    | 1 | seq |
| .....uUcgagagguacggggguuc.....                                                                               | 2    | 1 | seq |
| .....ugcgagagguGcggggguuc.....                                                                               | 36   | 1 | seq |
| .....ugcgagagUuacggggguuc.....                                                                               | 2    | 1 | seq |
| .....ugcgagagguacggggguAc.....                                                                               | 2    | 1 | seq |

# Mature Star

|                                                                                                                |       |   |     |
|----------------------------------------------------------------------------------------------------------------|-------|---|-----|
| acgguagagcgcgcuuugcaugcgagagguacggggguucgauacccccgaunnnngcuuugcaugcgagagguacggggguucgauacccccgaucuccaugauguguc |       |   |     |
| .....ugcgagagguacgggCuuc.....                                                                                  | 2     | 1 | seq |
| .....ugGgagagguacggggguuc.....                                                                                 | 4     | 1 | seq |
| .....ugcgagagguCcggggguuc.....                                                                                 | 2     | 1 | seq |
| .....Ngcgagagguacggggguuc.....                                                                                 | 18    | 1 | seq |
| .....ugcgagaggAacggggguuc.....                                                                                 | 2     | 1 | seq |
| .....ugcgaUagguacggggguuc.....                                                                                 | 2     | 1 | seq |
| .....ugcUagagguacggggguuc.....                                                                                 | 6     | 1 | seq |
| .....ugcgagagguacggggguuA.....                                                                                 | 206   | 1 | seq |
| .....ugcgagUggguacggggguuc.....                                                                                | 22    | 1 | seq |
| .....ugcgagaAguacggggguuc.....                                                                                 | 2     | 1 | seq |
| .....ugcgagagguacggggguuc.....                                                                                 | 14250 | 0 | seq |
| .....ugcgagagguacggggguGc.....                                                                                 | 34    | 1 | seq |
| .....ugcgagagguacCggguuc.....                                                                                  | 2     | 1 | seq |
| .....ugcgagagCuacggggguuc.....                                                                                 | 2     | 1 | seq |
| .....ugcgagagguacgUggguuc.....                                                                                 | 6     | 1 | seq |
| .....ugcgagagguUcggggguuc.....                                                                                 | 2     | 1 | seq |
| .....ugcgaUagguacggggguucg.....                                                                                | 4     | 1 | seq |
| .....ugcgagagCuacggggguucg.....                                                                                | 2     | 1 | seq |
| .....ugcgagagUuacggggguucg.....                                                                                | 4     | 1 | seq |
| .....ugcgagagguacggggguucU.....                                                                                | 136   | 1 | seq |
| .....ugcgagagguacggggguCc.....                                                                                 | 20    | 1 | seq |
| .....ugcgagagguacgggggCucg.....                                                                                | 28    | 1 | seq |
| .....ugcgagagguacggggguuAg.....                                                                                | 12    | 1 | seq |
| .....ugcgagaAguacggggguucg.....                                                                                | 4     | 1 | seq |
| .....ugGgagagguacggggguucg.....                                                                                | 2     | 1 | seq |
| .....ugcgagagguacggggguAcg.....                                                                                | 4     | 1 | seq |
| .....ugcgagagguacggggguGc.....                                                                                 | 16    | 1 | seq |
| .....ugcgagagguGcggggguucg.....                                                                                | 22    | 1 | seq |
| .....ugcgagagguacggggguucg.....                                                                                | 10064 | 0 | seq |
| .....uAcgagagguacggggguucg.....                                                                                | 18    | 1 | seq |
| .....uCcagagagguacggggguucg.....                                                                               | 2     | 1 | seq |
| .....Ggcgagagguacggggguucg.....                                                                                | 10    | 1 | seq |
| .....ugcUagagguacggggguucg.....                                                                                | 2     | 1 | seq |
| .....ugcgagaggAacggggguucg.....                                                                                | 10    | 1 | seq |
| .....Ngcgagagguacggggguucg.....                                                                                | 6     | 1 | seq |
| .....ugcgagagguacUggguucg.....                                                                                 | 10    | 1 | seq |
| .....ugcgagUggguacggggguucg.....                                                                               | 18    | 1 | seq |
| .....ugcgagCgguacggggguucg.....                                                                                | 2     | 1 | seq |
| .....ugAgagagguacggggguucg.....                                                                                | 4     | 1 | seq |
| .....ugcgagagguacggUguucg.....                                                                                 | 6     | 1 | seq |
| .....ugcgagagguacgAgguucg.....                                                                                 | 6     | 1 | seq |
| .....ugcgagagguUcggggguucg.....                                                                                | 12    | 1 | seq |
| .....ugcgagagguacgAgguucga.....                                                                                | 2     | 1 | seq |
| .....ugcgagagguacgggggCucga.....                                                                               | 2     | 1 | seq |
| .....ugcgagagguacggggguAcga.....                                                                               | 2     | 1 | seq |
| .....ugcgagagguacggggguucga.....                                                                               | 6     | 0 | seq |
| .....ugcgagagguacggggguucCa.....                                                                               | 2     | 1 | seq |
| .....ugcgagagguacggggguucgau.....                                                                              | 2     | 0 | seq |
| .....ugcgagagguacggggguucgGu.....                                                                              | 4     | 1 | seq |
| .....ugcgagagguacggggguucgUuaccccgca.....                                                                      | 4     | 1 | seq |
| .....ugcgagagguacggggguucgauacccccgauc.....                                                                    | 1     | 0 | seq |
| .....Acgagagguacggggguu.....                                                                                   | 6     | 1 | seq |
| .....gcgagagCuacggggguu.....                                                                                   | 2     | 1 | seq |
| .....gcgagagguacgggggu.....                                                                                    | 48    | 1 | seq |
| .....gcgagUggguacggggguu.....                                                                                  | 2     | 1 | seq |
| .....gcgagaggAacggggguu.....                                                                                   | 2     | 1 | seq |
| .....Ucgagagguacggggguu.....                                                                                   | 6     | 1 | seq |
| .....gcgagagguacggggguC.....                                                                                   | 386   | 1 | seq |
| .....gcgagagguGcggggguu.....                                                                                   | 8     | 1 | seq |
| .....Ncgagagguacggggguu.....                                                                                   | 4     | 1 | seq |
| .....gcgagagguacUggguu.....                                                                                    | 2     | 1 | seq |
| .....gcgagagguacggggguu.....                                                                                   | 2298  | 0 | seq |
| .....gcgagagguacgggggCu.....                                                                                   | 28    | 1 | seq |
| .....gcgCgagguacggggguuc.....                                                                                  | 2     | 1 | seq |
| .....gcgagagguacUggguuc.....                                                                                   | 2     | 1 | seq |
| .....Ccagagguacggggguuc.....                                                                                   | 2     | 1 | seq |
| .....gcgagagguacggggguuc.....                                                                                  | 7948  | 0 | seq |
| .....Acgagagguacggggguuc.....                                                                                  | 24    | 1 | seq |
| .....gcgagagguacggggguCc.....                                                                                  | 70    | 1 | seq |
| .....Ncgagagguacggggguuc.....                                                                                  | 12    | 1 | seq |

# Mature Star

|                                                                                                                 |      |   |     |
|-----------------------------------------------------------------------------------------------------------------|------|---|-----|
| acgguagagcgucgcuuugcaugcgagagguacggggguucgauacccccgaunnnngcuuugcaugcgagagguacggggguucgauacccccgcaucccaugauguguc |      |   |     |
| .....gcgagagguacggggguuA.....                                                                                   | 82   | 1 | seq |
| .....gcgagagguacCggguuc.....                                                                                    | 2    | 1 | seq |
| .....Gcgagagguacggggguuc.....                                                                                   | 2    | 1 | seq |
| .....Ucgagagguacggggguuc.....                                                                                   | 4    | 1 | seq |
| .....gcgagUggguacggggguuc.....                                                                                  | 12   | 1 | seq |
| .....gcgagagCuacggggguuc.....                                                                                   | 2    | 1 | seq |
| .....gcgagagguacggggguGc.....                                                                                   | 14   | 1 | seq |
| .....gcgagagguGcggggguuc.....                                                                                   | 12   | 1 | seq |
| .....gcgagagguacgggCguuc.....                                                                                   | 2    | 1 | seq |
| .....gcgagagguacggggCuc.....                                                                                    | 48   | 1 | seq |
| .....gcgagagguUcggggguuc.....                                                                                   | 2    | 1 | seq |
| .....gcgagagguacgggCuuc.....                                                                                    | 2    | 1 | seq |
| .....gcgagagguacCggguuc.....                                                                                    | 2    | 1 | seq |
| .....gcgagagUuacggggguuc.....                                                                                   | 2    | 1 | seq |
| .....gcgagCggguacggggguuc.....                                                                                  | 6    | 1 | seq |
| .....gcgagaAguacggggguuc.....                                                                                   | 4    | 1 | seq |
| .....gcgagagguacggUguuc.....                                                                                    | 4    | 1 | seq |
| .....gcgagagguacggggguucU.....                                                                                  | 68   | 1 | seq |
| .....gcgagUggguacggggguucg.....                                                                                 | 4    | 1 | seq |
| .....gcgagagguacUggggguucg.....                                                                                 | 2    | 1 | seq |
| .....Ucgagagguacggggguucg.....                                                                                  | 6    | 1 | seq |
| .....gcUagagguacggggguucg.....                                                                                  | 8    | 1 | seq |
| .....gcgagagguacggggguCcg.....                                                                                  | 22   | 1 | seq |
| .....gcgagagguacggggguuAa.....                                                                                  | 4    | 1 | seq |
| .....Ncgagagguacggggguucg.....                                                                                  | 2    | 1 | seq |
| .....gcgagagguacggggguucg.....                                                                                  | 5312 | 0 | seq |
| .....Acgagagguacggggguucg.....                                                                                  | 12   | 1 | seq |
| .....gcgagaggAacggggguucg.....                                                                                  | 8    | 1 | seq |
| .....Ccgagagguacggggguucg.....                                                                                  | 2    | 1 | seq |
| .....gcgagagguUcggggguucg.....                                                                                  | 2    | 1 | seq |
| .....gcgagagguGcggggguucg.....                                                                                  | 16   | 1 | seq |
| .....gcgagagguacgggggCuucg.....                                                                                 | 16   | 1 | seq |
| .....gcgagCggguacggggguucg.....                                                                                 | 2    | 1 | seq |
| .....gcgagaAguacggggguucg.....                                                                                  | 2    | 1 | seq |
| .....gcgagagguacggggguGcg.....                                                                                  | 6    | 1 | seq |
| .....gcgagagguacggggguucgG.....                                                                                 | 2    | 1 | seq |
| .....gcgagagguacggggguucgC.....                                                                                 | 2    | 1 | seq |
| .....gcgagagguacggggguucCa.....                                                                                 | 2    | 1 | seq |
| .....gcgagagguacggggguucgUu.....                                                                                | 4    | 1 | seq |
| .....gcgagagguacggggguucgau.....                                                                                | 4    | 0 | seq |
| .....gcgagagguacggggguucgCu.....                                                                                | 2    | 1 | seq |
| .....gcgagagguacggggguucgaGa.....                                                                               | 2    | 1 | seq |
| .....gcgagagguacggggguucgGuacccccga.....                                                                        | 2    | 1 | seq |
| .....gcgagagguacggggguucgUuacccccga.....                                                                        | 4    | 1 | seq |
| .....cgagagguacggggguuA.....                                                                                    | 2    | 1 | seq |
| .....cgagagguUcggggguuc.....                                                                                    | 2    | 1 | seq |
| .....cUagagguacggggguuc.....                                                                                    | 2    | 1 | seq |
| .....cgagagguacggggguuc.....                                                                                    | 182  | 0 | seq |
| .....Ggagagguacggggguuc.....                                                                                    | 2    | 1 | seq |
| .....cgagUggguacggggguuc.....                                                                                   | 2    | 1 | seq |
| .....cgagagguacggggguCcg.....                                                                                   | 2    | 1 | seq |
| .....Aagagguacggggguucg.....                                                                                    | 2    | 1 | seq |
| .....cgagagguacggggguucg.....                                                                                   | 106  | 0 | seq |
| .....cgagagguacggggguuAa.....                                                                                   | 2    | 1 | seq |
| .....cgagagguacggggguucU.....                                                                                   | 2    | 1 | seq |
| .....gagagguGcggggguucg.....                                                                                    | 2    | 1 | seq |
| .....gagagguacggggguuAa.....                                                                                    | 4    | 1 | seq |
| .....gagagguacgAagguucg.....                                                                                    | 2    | 1 | seq |
| .....gagagguacgggggCuucg.....                                                                                   | 4    | 1 | seq |
| .....gaUagguacggggguucg.....                                                                                    | 2    | 1 | seq |
| .....Cagagguacggggguucg.....                                                                                    | 2    | 1 | seq |
| .....gagagguacggggguucg.....                                                                                    | 728  | 0 | seq |
| .....gagagguacggggguGcg.....                                                                                    | 2    | 1 | seq |
| .....gagagguacggggguCcg.....                                                                                    | 2    | 1 | seq |
| .....agagguacggggguucgG.....                                                                                    | 2    | 1 | seq |
| .....agagguacggggguucgC.....                                                                                    | 2    | 1 | seq |
| .....agagguacggggguucga.....                                                                                    | 6    | 0 | seq |
| .....agagguacggggguucgau.....                                                                                   | 2    | 0 | seq |
| .....agagguacggggguucgUuac.....                                                                                 | 2    | 1 | seq |
| .....gagguacggggguucgaC.....                                                                                    | 2    | 1 | seq |

# Mature Star

|                                                                                                                |    |   |     |
|----------------------------------------------------------------------------------------------------------------|----|---|-----|
| acgguagagcgcgcuuugcaugcgagagguacggggguucgauaccccgcaunnngcuuugcaugcgagagguacggggguucgauaccccgcauccuccaugauguguc |    |   |     |
| .....gagguacggggguucgUua.....                                                                                  | 2  | 1 | seq |
| .....gagguacggggguucgUuac.....                                                                                 | 2  | 1 | seq |
| .....gagguacggggguucgGuacc.....                                                                                | 2  | 1 | seq |
| .....gagguacggggguucgUuaccc.....                                                                               | 2  | 1 | seq |
| .....agguacggggguucgaAa.....                                                                                   | 2  | 1 | seq |
| .....gguacggggguucgauaccccgcauc.....                                                                           | 1  | 0 | seq |
| .....guacggggguucgUuaccc.....                                                                                  | 2  | 1 | seq |
| .....uacggggguucgGuaccccgca.....                                                                               | 2  | 1 | seq |
| .....uucgauaccccgcaucu.....                                                                                    | 1  | 0 | seq |
| .....uucgauaccccgcaucca.....                                                                                   | 1  | 0 | seq |
| .....ucgGuaccccgcaucc.....                                                                                     | 1  | 1 | seq |
| .....ucgGuaccccgcauccca.....                                                                                   | 1  | 1 | seq |
| .....ucgauaccccgcaucccG.....                                                                                   | 1  | 1 | seq |
| .....gauaccccgcauccca.....                                                                                     | 1  | 0 | seq |
| .....auaccccgcaucccau.....                                                                                     | 1  | 0 | seq |
| .....uaccccgcaucccaCg.....                                                                                     | 12 | 1 | seq |
| .....uaccccgcaucccaug.....                                                                                     | 1  | 0 | seq |
| .....accccgcaucccaCga.....                                                                                     | 1  | 1 | seq |
| .....ccccgcaucccaugaCg....                                                                                     | 1  | 1 | seq |

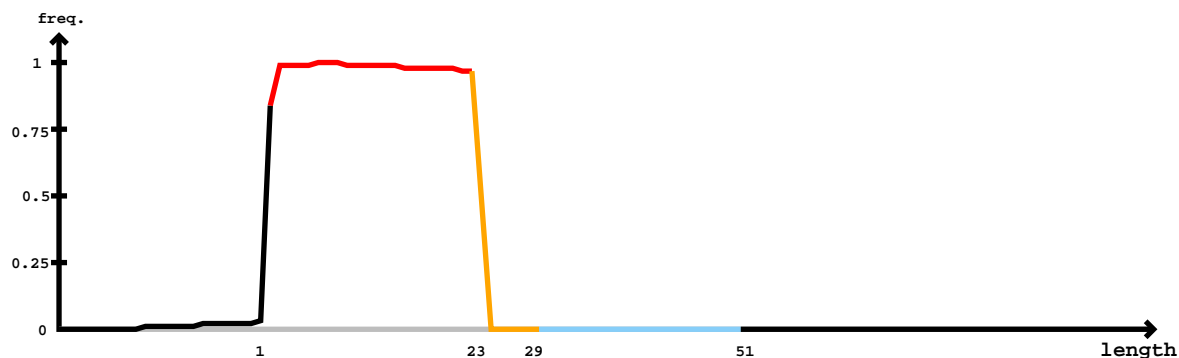[illegible]

[illegible]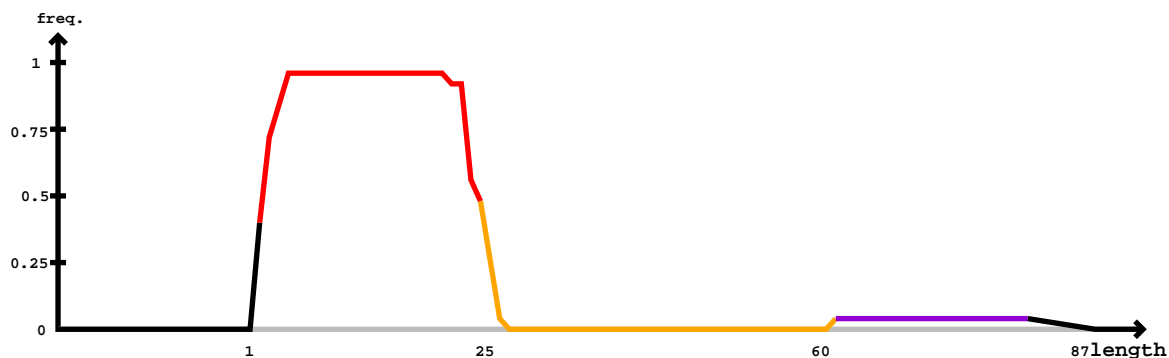

Star

[illegible]





# Star Mature

ggagagagcgguacuagaaaaagggaagauagaaacgaaaaaccuaccuuucuugggccuuuuggcuaaagaucaaguguagaucaucuaucuaucaguuuaauaucu

|                                           |     |   |     |
|-------------------------------------------|-----|---|-----|
| .....gccuuuuggcuaaagaucaaguguagu.....     | 1   | 0 | seq |
| .....gccuuuuggcuaaagaucaaguguagua.....    | 2   | 0 | seq |
| .....gccuuuuggcuaaagaucaaguguaguau.....   | 2   | 0 | seq |
| .....gccuuuuggcuaaagaucaaguguaguauC.....  | 1   | 0 | seq |
| .....gccuuuuggcuaaagaucaaguguaguauC.....  | 7   | 1 | seq |
| .....gccuuuuggcuaaagaucaaguguaguauC.....  | 33  | 0 | seq |
| .....gccuuuuggcuaaagaucaaguguaguauCG..... | 1   | 1 | seq |
| .....gccuuuuggcuaaagaucaaguguaguauC.....  | 1   | 1 | seq |
| .....ccuuuuggcuaaagaucaagug.....          | 1   | 0 | seq |
| .....ccuuuuggcuaaagaucaagugua.....        | 1   | 0 | seq |
| .....ccuuuuggcuaaagaucaaguguagua.....     | 1   | 0 | seq |
| .....cuuuuuggcuaaagaucaag.....            | 6   | 0 | seq |
| .....cuuuuuggcuaaagaucaagC.....           | 1   | 1 | seq |
| .....cuuuuuggcuaaagaucaagu.....           | 1   | 0 | seq |
| .....cuuuuuggcuaaagaucaagugu.....         | 1   | 0 | seq |
| .....cuuuuuggcuaaagaucaagugua.....        | 9   | 0 | seq |
| .....cuuuuuggcuaaagaucaagugCa.....        | 1   | 1 | seq |
| .....cuuuuuggcuaaagaucaaguguagua.....     | 1   | 0 | seq |
| .....cuuuuuggcuaaagaucaaguguaguauC.....   | 4   | 0 | seq |
| .....cCuuuuggcuaaagaucaaguguaguauC.....   | 1   | 1 | seq |
| .....cuuuuuggcuaaagaucaaguguaguauC.....   | 1   | 1 | seq |
| .....cuuuuuggcuaaagaucaaguguaguauC.....   | 1   | 0 | seq |
| .....uuuuuggcuaaagaucaag.....             | 2   | 0 | seq |
| .....uuuuuggcuaaagaucaagC.....            | 1   | 1 | seq |
| .....uuuuuggcuaaagaucaagC.....            | 2   | 1 | seq |
| .....uuuuuggcuaaagaucaagu.....            | 9   | 0 | seq |
| .....uuuuuggcuaaagaucaagug.....           | 5   | 0 | seq |
| .....uuuuuggcuaaagaucaaguu.....           | 1   | 1 | seq |
| .....uuuuuggcuaaagaucaagugu.....          | 4   | 0 | seq |
| .....uuuuuggcuaaagaucaagugC.....          | 1   | 1 | seq |
| .....uuuuuggcuaaagaucaagugua.....         | 25  | 0 | seq |
| .....uuuuuggcuaaagaucaagugCa.....         | 2   | 1 | seq |
| .....uuuuuggcuaaagaucaagugua.....         | 1   | 1 | seq |
| .....uuuuuggcuaaagaucaagugu.....          | 1   | 1 | seq |
| .....Cuuuuggcuaaagaucaagugua.....         | 1   | 1 | seq |
| .....uuuuuggcuaaagaucaaguguag.....        | 4   | 0 | seq |
| .....uuuuuggcuaaagaucaaguguagu.....       | 2   | 0 | seq |
| .....uuuuuggcuaaagaucaaguguagua.....      | 1   | 0 | seq |
| .....uuuuuggcuaaagaucaaguguaguauC.....    | 1   | 1 | seq |
| .....uuuuuggcuaaagaucaaguguaguauC.....    | 3   | 1 | seq |
| .....uuCugggcuaaagaucaaguguaguauC.....    | 1   | 1 | seq |
| .....uuuuuggcuaaagaucaaguguaguauC.....    | 1   | 0 | seq |
| .....uuuuuggcuaaagaucaaguA.....           | 2   | 1 | seq |
| .....uuuuuggcuaaagaucaagug.....           | 5   | 0 | seq |
| .....uuuuuggcuaaagaucaagugu.....          | 2   | 0 | seq |
| .....uuuuuggcuaaagaucaaguguC.....         | 1   | 1 | seq |
| .....uuuuuggcuaaagaucaagugu.....          | 16  | 0 | seq |
| .....uuuuuggcuaaagaucaaguguag.....        | 13  | 0 | seq |
| .....uuuuuggcuaaagaucaaguguagu.....       | 1   | 0 | seq |
| .....uuuuuggcuaaagaucaaguguagu.....       | 3   | 0 | seq |
| .....uuuuuggcuaaagaucaaguguaguauC.....    | 1   | 1 | seq |
| .....uuuuuggcuaaagaucaaguguaguauC.....    | 2   | 0 | seq |
| .....uuuuuggcuaaagaucaaguguaguauCG.....   | 1   | 1 | seq |
| .....uuuuuggcuaaagaucaaguguaguauC.....    | 1   | 0 | seq |
| .....uugggcuaaagaucaagCg.....             | 3   | 1 | seq |
| .....uugggcuaaagaucaagug.....             | 1   | 1 | seq |
| .....uugggcuaaagaucaaguu.....             | 4   | 1 | seq |
| .....uugggcuaaagGucaagug.....             | 1   | 1 | seq |
| .....uugggcuaaagaucaaguuA.....            | 5   | 1 | seq |
| .....uugggcuaaagaucaagug.....             | 186 | 0 | seq |
| .....uCGgcuaaagaucaagug.....              | 2   | 1 | seq |
| .....uugggcuaaagaucaagug.....             | 2   | 1 | seq |
| .....uugggcuaaagauAaagug.....             | 1   | 1 | seq |
| .....Nugggcuaaagaucaagugu.....            | 1   | 1 | seq |
| .....uugggcuaaagaucaagugC.....            | 13  | 1 | seq |
| .....uugggcuaaagaucaagugG.....            | 3   | 1 | seq |
| .....uCGgcuaaagaucaagugu.....             | 1   | 1 | seq |
| .....uugggcuaaagaucaUgugu.....            | 1   | 1 | seq |
| .....uugggcuaaagaucaGagugu.....           | 1   | 1 | seq |

# Star Mature

ggagagagcggguacuagaaaaugggaaaagauagaaacgaaaaaccuaccuuuucugggccuuuuggcuaagaucaaguguagaucauucuuaucaaguuuaauaucu

|                                          |      |   |     |
|------------------------------------------|------|---|-----|
| .....uuggcuaagaucaagugu.....             | 52   | 0 | seq |
| .....Nuggcuaagaucaagugua.....            | 1    | 1 | seq |
| .....Auggcuaagaucaagugua.....            | 1    | 1 | seq |
| .....uuggcuaagaucaaguguU.....            | 4    | 1 | seq |
| .....uuAgcuaagaucaagugua.....            | 1    | 1 | seq |
| .....uuggcuaagaucaagGgua.....            | 1    | 1 | seq |
| .....uuggUuaagaucaagugua.....            | 1    | 1 | seq |
| .....uuggcuaagaucaagugua.....            | 340  | 0 | seq |
| .....uuggcuaagaucaagugCa.....            | 3    | 1 | seq |
| .....uuggcGaagaucaagugua.....            | 1    | 1 | seq |
| .....uuggcCaagaucaagugua.....            | 1    | 1 | seq |
| .....uuggcuaagaucaagugua.....            | 2    | 1 | seq |
| .....Cuggcuaagaucaagugua.....            | 3    | 1 | seq |
| .....uuggcuaagaucaagugua.....            | 1    | 1 | seq |
| .....uuggcuaagaucaagugGa.....            | 2    | 1 | seq |
| .....uCggcuaagaucaagugua.....            | 1    | 1 | seq |
| .....Cuggcuaagaucaaguguaag.....          | 1    | 1 | seq |
| .....uuggcuaagaucaagugCag.....           | 1    | 1 | seq |
| .....uuggcuaagaucaaguuUuag.....          | 1    | 1 | seq |
| .....uuggcuGagaucaaguguaag.....          | 1    | 1 | seq |
| .....uuggcuaagaucaaguguaA.....           | 4    | 1 | seq |
| .....uuggcuaagaucaaguguaag.....          | 166  | 0 | seq |
| .....uuggcuaagaucaagCguaag.....          | 1    | 1 | seq |
| .....uuggcuaagGucaaguguaag.....          | 1    | 1 | seq |
| .....uuggcuaGgaucaguguaag.....           | 1    | 1 | seq |
| .....uuggcuaagaucaaguguaag.....          | 1    | 1 | seq |
| .....uuggcuaagaucaaguguaagu.....         | 1    | 0 | seq |
| .....uuggcuaagaucaaguguaagua.....        | 4    | 0 | seq |
| .....uuggcuaagaucaaguguaaguau.....       | 1    | 0 | seq |
| .....uuggcuaagaucaaguguaaguauC.....      | 4    | 1 | seq |
| .....uuggcuaagaucaaguguaaguauCu.....     | 44   | 0 | seq |
| .....CuggcuaagaucaaguguaaguauCu.....     | 1    | 1 | seq |
| .....uuggcuaagaucaagugAguauCu.....       | 1    | 1 | seq |
| .....uuggcuaagaucaaguguaaguauCG.....     | 1    | 1 | seq |
| .....uCggcuaagaucaaguguaaguauCu.....     | 1    | 1 | seq |
| .....uuggcuaagaucaaguguaaguauCu.....     | 11   | 0 | seq |
| .....uuggcuaagaucaaguguaaguauCuauCu..... | 1    | 1 | seq |
| .....uuggcuaagaucaaguguaaguauCuauCu..... | 3    | 0 | seq |
| .....Gggcuaagaucaagugu.....              | 1    | 1 | seq |
| .....uggcuaagaCcaagugu.....              | 2    | 1 | seq |
| .....uggcuaagaucaagugu.....              | 261  | 0 | seq |
| .....uggcuaagaucaagugA.....              | 4    | 1 | seq |
| .....uggcuaagaucaagugG.....              | 3    | 1 | seq |
| .....uggcuaagaucaagCgu.....              | 1    | 1 | seq |
| .....uggcuaagaucaagugC.....              | 45   | 1 | seq |
| .....uggcuaagaucaUgugu.....              | 1    | 1 | seq |
| .....Cggcuaagaucaagugu.....              | 1    | 1 | seq |
| .....uggcuaagaucaagugu.....              | 1    | 1 | seq |
| .....uCgcuaagaucaagugu.....              | 1    | 1 | seq |
| .....uggcuaagaucaagugua.....             | 1    | 1 | seq |
| .....Nggcuaagaucaagugua.....             | 1    | 1 | seq |
| .....uggcuGagaucaagugua.....             | 3    | 1 | seq |
| .....uggcuUgaucagugua.....               | 1    | 1 | seq |
| .....uggcuaagaucaagugCa.....             | 15   | 1 | seq |
| .....uggcuaagaGcaagugua.....             | 1    | 1 | seq |
| .....uggcuaagaGaaugua.....               | 1    | 1 | seq |
| .....uggcuaagaucaagugua.....             | 1211 | 0 | seq |
| .....uggcuaagaucaaguCu.....              | 1    | 1 | seq |
| .....uggUuaagaucaagugua.....             | 1    | 1 | seq |
| .....uggcuaagUucaagugua.....             | 1    | 1 | seq |
| .....Aggcuaagaucaagugua.....             | 1    | 1 | seq |
| .....uggcuaagaucaagCgua.....             | 7    | 1 | seq |
| .....uggcuaagaCcaagugua.....             | 5    | 1 | seq |
| .....Gggcuaagaucaagugua.....             | 4    | 1 | seq |
| .....uggcuaagCucaagugua.....             | 1    | 1 | seq |
| .....uggcuaGgaucagugua.....              | 7    | 1 | seq |
| .....uggcuaagaucaagugua.....             | 4    | 1 | seq |
| .....uggcuaagaucaaguguU.....             | 4    | 1 | seq |
| .....uggcuaagaucaagAgu.....              | 1    | 1 | seq |
| .....uggcuaagaAcaagugua.....             | 1    | 1 | seq |

# Star Mature

ggagagagcgguacuagaaaaugggaaaagauagaaacgaaaaaccuaccuuuucuggccuuuuggcuaagaucaaguguagaucauucuuaucaguuuuaauaucu

|                                                     |      |   |     |
|-----------------------------------------------------|------|---|-----|
| .....uggcuaagaucaUgugua.....                        | 17   | 1 | seq |
| .....uggcuaagaucaaguAua.....                        | 1    | 1 | seq |
| .....uggcuaagaucaGgugua.....                        | 4    | 1 | seq |
| .....uggcuaagGucaagugua.....                        | 2    | 1 | seq |
| .....uggcuaagaucaagugGa.....                        | 1    | 1 | seq |
| .....Cggcuaagaucaagugua.....                        | 6    | 1 | seq |
| .....Nggcuaagaucaaguguaag.....                      | 2    | 1 | seq |
| .....uggcuaagaAcaaguguaag.....                      | 1    | 1 | seq |
| .....uggcuGagaucaaguguaag.....                      | 4    | 1 | seq |
| .....uggcuaagaucaaguguaag.....                      | 1555 | 0 | seq |
| .....uggcuAGaucaaguguaag.....                       | 6    | 1 | seq |
| .....uggUuaagaucaaguguaag.....                      | 3    | 1 | seq |
| .....Cggcuaagaucaaguguaag.....                      | 3    | 1 | seq |
| .....Aggcuaagaucaaguguaag.....                      | 1    | 1 | seq |
| .....uggcuaagaucaUguguaag.....                      | 6    | 1 | seq |
| .....uggcuaagaucaagCguag.....                       | 7    | 1 | seq |
| .....uggAuaagaucaaguguaag.....                      | 1    | 1 | seq |
| .....uggcuaagaucaUaguguaag.....                     | 1    | 1 | seq |
| .....uggcuaagGucaaguguaag.....                      | 7    | 1 | seq |
| .....uggcuaagaucaagugCag.....                       | 7    | 1 | seq |
| .....uggcuaagaucaaguguaA.....                       | 53   | 1 | seq |
| .....uggcuaagaucaaguguCg.....                       | 1    | 1 | seq |
| .....uggcuaagaucaaguguaC.....                       | 3    | 1 | seq |
| .....uggcuaagaucaGguguaag.....                      | 4    | 1 | seq |
| .....uggcuaagauUaaguguaag.....                      | 2    | 1 | seq |
| .....uggcuaagUucaaguguaag.....                      | 3    | 1 | seq |
| .....uggcuaagaucaagugUg.....                        | 1    | 1 | seq |
| .....ugCcuagaucaaguguaag.....                       | 1    | 1 | seq |
| .....uUgcuaagaucaaguguaag.....                      | 2    | 1 | seq |
| .....uggcAaagaucaaguguaag.....                      | 1    | 1 | seq |
| .....Gggcuaagaucaaguguaag.....                      | 4    | 1 | seq |
| .....uggcuaagaCcaaguguaag.....                      | 1    | 1 | seq |
| .....uggcuaagaucaGaguguaag.....                     | 3    | 1 | seq |
| .....uAgcuaagaucaaguguaag.....                      | 2    | 1 | seq |
| .....uggcuaagaucaCguguaag.....                      | 1    | 1 | seq |
| .....uggcuaagaucaagugua <u>g</u> .....              | 2    | 0 | seq |
| .....uggcuaagaucaagugua <u>g</u> A.....             | 1    | 1 | seq |
| .....uggcuaagaucaagugua <u>g</u> ua.....            | 7    | 0 | seq |
| .....uggcuaagaucaagugua <u>g</u> uaC.....           | 1    | 1 | seq |
| .....uggcuaagaucaagugua <u>g</u> ua <u>u</u> .....  | 2    | 0 | seq |
| .....uggcuaagaucaagugua <u>g</u> ua <u>u</u> C..... | 3    | 0 | seq |
| .....uggcuaagaucaagugua <u>g</u> ua <u>u</u> C..... | 5    | 1 | seq |
| .....uggcuaagaucaagugua <u>g</u> ua <u>u</u> C..... | 3    | 1 | seq |
| .....uggcuaagaucaagugua <u>g</u> ua <u>u</u> C..... | 1    | 1 | seq |
| .....uggcuaagaucaagugua <u>g</u> ua <u>u</u> C..... | 59   | 0 | seq |
| .....uggcuaagGucaagugua <u>g</u> ua <u>u</u> C..... | 1    | 1 | seq |
| .....uggcuaagaucaagugCagua <u>u</u> C.....          | 1    | 1 | seq |
| .....uggcuaagaucaagugua <u>g</u> ua <u>u</u> C..... | 21   | 0 | seq |
| .....Cggcuaagaucaagugua <u>g</u> ua <u>u</u> C..... | 1    | 1 | seq |
| .....uggcuaagaucaagugua <u>g</u> ua <u>u</u> C..... | 3    | 0 | seq |
| .....uggcuaagaucaagugua <u>g</u> ua <u>u</u> C..... | 1    | 0 | seq |
| .....ggUuaagaucaagugua.....                         | 1    | 1 | seq |
| .....ggcuAaagaucaaguCua.....                        | 1    | 1 | seq |
| .....ggcuAaagAcaagugua.....                         | 1    | 1 | seq |
| .....ggcuAaagaucaagugCa.....                        | 3    | 1 | seq |
| .....ggcuGagaucaagugua.....                         | 1    | 1 | seq |
| .....ggcAaagaucaagugua.....                         | 1    | 1 | seq |
| .....ggcuAaagaucaagCgua.....                        | 2    | 1 | seq |
| .....ggcuAaagaucaagugua.....                        | 127  | 0 | seq |
| .....ggcuAaagaucaagugGa.....                        | 1    | 1 | seq |
| .....ggGuaagaucaaguguaag.....                       | 2    | 1 | seq |
| .....ggcuAaAuaaguguaag.....                         | 2    | 1 | seq |
| .....ggcCaagaucaaguguaag.....                       | 3    | 1 | seq |
| .....gUcuAaagaucaaguguaag.....                      | 1    | 1 | seq |
| .....ggcuAaagaucaagCguaag.....                      | 4    | 1 | seq |
| .....ggcuAaagCucaaguguaag.....                      | 1    | 1 | seq |
| .....ggcuAaagGucaaguguaag.....                      | 7    | 1 | seq |
| .....ggcuAUgaucaguguaag.....                        | 1    | 1 | seq |
| .....ggcuAaagaucaAaguguaag.....                     | 2    | 1 | seq |
| .....ggcuAaagaucaaguguaC.....                       | 8    | 1 | seq |

# Star Mature

|                                                                                                                                                 |      |   |     |
|-------------------------------------------------------------------------------------------------------------------------------------------------|------|---|-----|
| ggagagagcgguacuagaaaaugggaaaagauagaacgaaaaacc <u>auaccuuucuuuggccuuuu</u> <u>ggcuaagaucaagugu</u> agaucauucuuauca <u>guuuaaua</u> uau <u>cu</u> |      |   |     |
| .....ggUuaagaucaaguguag.....                                                                                                                    | 9    | 1 | seq |
| .....ggcuaagaucaaguguag.....                                                                                                                    | 1555 | 0 | seq |
| .....ggcuaagau <u>cU</u> aguguag.....                                                                                                           | 2    | 1 | seq |
| .....ggcuaagaCcaaguguag.....                                                                                                                    | 3    | 1 | seq |
| .....ggcuaagaucaaguguagA.....                                                                                                                   | 51   | 1 | seq |
| .....ggcuaagaucaCguguag.....                                                                                                                    | 1    | 1 | seq |
| .....ggcuaagaucaGguguag.....                                                                                                                    | 11   | 1 | seq |
| .....ggcuaagau <u>cG</u> aguguag.....                                                                                                           | 6    | 1 | seq |
| .....ggcuaGgaucaaguguag.....                                                                                                                    | 4    | 1 | seq |
| .....ggcuaagaucaUguguag.....                                                                                                                    | 6    | 1 | seq |
| .....ggcuGagaucaaguguag.....                                                                                                                    | 1    | 1 | seq |
| .....ggcuaagaucaagugCag.....                                                                                                                    | 5    | 1 | seq |
| .....ggcuaagauca <u>aC</u> uguag.....                                                                                                           | 1    | 1 | seq |
| .....ggcuaagaucaagAguag.....                                                                                                                    | 1    | 1 | seq |
| .....ggcuaagaucaaguguagu.....                                                                                                                   | 1    | 0 | seq |
| .....ggcuaagaucaaguguagu <u>a</u> .....                                                                                                         | 12   | 0 | seq |
| .....ggcuaagaucaaguguagu <u>au</u> .....                                                                                                        | 2    | 0 | seq |
| .....ggcuaagaucaaguguagu <u>aC</u> .....                                                                                                        | 1    | 1 | seq |
| .....ggcuaagaucaaguguagu <u>auc</u> .....                                                                                                       | 3    | 0 | seq |
| .....Agcuaagaucaaguguagu <u>au</u> uau.....                                                                                                     | 3    | 1 | seq |
| .....ggcCaagaucaaguguagu <u>au</u> uau.....                                                                                                     | 1    | 1 | seq |
| .....Ngcuaagaucaaguguagu <u>au</u> uau.....                                                                                                     | 1    | 1 | seq |
| .....ggcuaagaucaGguguagu <u>au</u> uau.....                                                                                                     | 4    | 1 | seq |
| .....ggcuGagaucaaguguagu <u>au</u> uau.....                                                                                                     | 4    | 1 | seq |
| .....ggcuaagau <u>cU</u> aguguagu <u>au</u> uau.....                                                                                            | 2    | 1 | seq |
| .....gUcuaagaucaaguguagu <u>au</u> uau.....                                                                                                     | 1    | 1 | seq |
| .....ggcuaagaucaaguguagu <u>au</u> uauG.....                                                                                                    | 33   | 1 | seq |
| .....ggcuaagaucaaguguagu <u>au</u> uGu.....                                                                                                     | 2    | 1 | seq |
| .....ggcuaagaucaaguguagu <u>au</u> uA.....                                                                                                      | 29   | 1 | seq |
| .....ggcuaagaucaaguguagu <u>au</u> uA <u>c</u> u.....                                                                                           | 1    | 1 | seq |
| .....ggcuaagaucaag <u>uA</u> uagu <u>au</u> uau.....                                                                                            | 2    | 1 | seq |
| .....ggcuaagaucaaguguagu <u>au</u> uA <u>C</u> u.....                                                                                           | 3    | 1 | seq |
| .....ggcuaagaucaagugu <u>uU</u> gu <u>au</u> uau.....                                                                                           | 1    | 1 | seq |
| .....ggcuaagaucaUguguagu <u>au</u> uau.....                                                                                                     | 3    | 1 | seq |
| .....ggcuaagaCcaaguguagu <u>au</u> uau.....                                                                                                     | 3    | 1 | seq |
| .....ggcuaagaucaaguguagu <u>au</u> uauC.....                                                                                                    | 193  | 1 | seq |
| .....ggcuaCgaucaaguguagu <u>au</u> uau.....                                                                                                     | 1    | 1 | seq |
| .....ggcuaagaucaagugCagu <u>au</u> uau.....                                                                                                     | 4    | 1 | seq |
| .....ggcuaagaucaaguguagu <u>au</u> uA <u>u</u> u.....                                                                                           | 1    | 1 | seq |
| .....ggcuaagaucaaguguagu <u>au</u> uau.....                                                                                                     | 1244 | 0 | seq |
| .....ggcuaagaucaag <u>uU</u> agu <u>au</u> uau.....                                                                                             | 1    | 1 | seq |
| .....ggUuaagaucaaguguagu <u>au</u> uau.....                                                                                                     | 1    | 1 | seq |
| .....ggcuaagau <u>cG</u> aguguagu <u>au</u> uau.....                                                                                            | 4    | 1 | seq |
| .....ggcuaGgaucaaguguagu <u>au</u> uau.....                                                                                                     | 3    | 1 | seq |
| .....ggcuaagGucaaguguagu <u>au</u> uau.....                                                                                                     | 8    | 1 | seq |
| .....ggcuaagaucaagugu <u>uA</u> uau.....                                                                                                        | 1    | 1 | seq |
| .....ggcuaagaucaagCguagu <u>au</u> uau.....                                                                                                     | 5    | 1 | seq |
| .....Ugcuaagaucaaguguagu <u>au</u> uau.....                                                                                                     | 1    | 1 | seq |
| .....ggcuaagGucaaguguagu <u>au</u> uau.....                                                                                                     | 2    | 1 | seq |
| .....ggcuaagaucaaguguagu <u>au</u> uauC.....                                                                                                    | 8    | 1 | seq |
| .....Ugcuaagaucaaguguagu <u>au</u> uau.....                                                                                                     | 1    | 1 | seq |
| .....ggcuaagaucaaguguagu <u>au</u> uA <u>a</u> .....                                                                                            | 1    | 1 | seq |
| .....ggcuaagaucaaguguagu <u>au</u> uauU.....                                                                                                    | 1    | 1 | seq |
| .....ggcuaagaucaaguguagu <u>au</u> uauC <u>a</u> .....                                                                                          | 1    | 1 | seq |
| .....ggcuaagaucaaguguagu <u>au</u> uau.....                                                                                                     | 148  | 0 | seq |
| .....ggcuaagaucaGguguagu <u>au</u> uau.....                                                                                                     | 2    | 1 | seq |
| .....ggUuaagaucaaguguagu <u>au</u> uau.....                                                                                                     | 2    | 1 | seq |
| .....ggcuaagaucaagugu <u>uA</u> uau.....                                                                                                        | 1    | 1 | seq |
| .....ggcuaagaucaaguguagu <u>au</u> uauu.....                                                                                                    | 1    | 0 | seq |
| .....ggcuaagaucaagugCagu <u>au</u> uauu.....                                                                                                    | 1    | 1 | seq |
| .....ggcuaagaucaaguguagu <u>au</u> uauCu.....                                                                                                   | 2    | 1 | seq |
| .....ggcuaagaucaaguguagu <u>au</u> uauuau.....                                                                                                  | 8    | 0 | seq |
| .....ggcuaagaucaaguguagu <u>au</u> uauuauC.....                                                                                                 | 1    | 1 | seq |
| .....ggcuaagaucaagGguagu <u>au</u> uauuau.....                                                                                                  | 1    | 1 | seq |
| .....ggcuaagaucaaguguagu <u>au</u> uauuauuu.....                                                                                                | 9    | 0 | seq |
| .....ggcuaagaCcaaguguagu <u>au</u> uauuau.....                                                                                                  | 1    | 1 | seq |
| .....ggcuaagaucaaguguagu <u>au</u> uauuauu.....                                                                                                 | 3    | 0 | seq |
| .....ggcuaagaucaaguguagu <u>au</u> uauuauuau.....                                                                                               | 1    | 0 | seq |
| .....gcuaagaucaaguguag.....                                                                                                                     | 16   | 0 | seq |
| .....gcuaagaucaUguguag.....                                                                                                                     | 1    | 1 | seq |

# Star Mature

ggagagagcgguacuagaaaaugggaaaagauagaaacgaaaaccuaccuuucuugggccuuuuggcuaagaucaaguguagaucauucuuaucaguuuaauaucu

|                                      |     |   |     |
|--------------------------------------|-----|---|-----|
| .....gcuaagaucaaguguagua.....        | 2   | 0 | seq |
| .....gcuaagaucaaguguaguaucua.....    | 1   | 0 | seq |
| .....cuaagaucaagugCagu.....          | 1   | 1 | seq |
| .....cuaagaucaaguguagu.....          | 4   | 0 | seq |
| .....cuaGgaucaaguguagua.....         | 1   | 1 | seq |
| .....cuaagaucaaguguagua.....         | 2   | 0 | seq |
| .....cuaagaucaaguguaguau.....        | 4   | 0 | seq |
| .....cuaagaucaaguguaguauC.....       | 4   | 0 | seq |
| .....GuaagaucaaguguaguauC.....       | 1   | 1 | seq |
| .....cuaagaucaGguguaguauC.....       | 1   | 1 | seq |
| .....cuaagaucaaguguaguauC.....       | 35  | 1 | seq |
| .....cuaagaucaaaUuguaguauC.....      | 1   | 1 | seq |
| .....cuaagaucaaguguaguauC.....       | 227 | 0 | seq |
| .....cuaagaucaaguguaguUguC.....      | 1   | 1 | seq |
| .....cuaagaucaaguguaguUuc.....       | 1   | 1 | seq |
| .....cuaagaucaaguguaguauCA.....      | 6   | 1 | seq |
| .....cuaagaucaaguguaguauCG.....      | 2   | 1 | seq |
| .....cuGagaucaaguguaguauC.....       | 1   | 1 | seq |
| .....cuaagaucaUguguaguauC.....       | 1   | 1 | seq |
| .....UuaagaucaaguguaguauC.....       | 1   | 1 | seq |
| .....cuaagaucaaguguaguGauC.....      | 1   | 1 | seq |
| .....cuaagaucaaguguaguauCua.....     | 3   | 0 | seq |
| .....cuaagaucaaguguaguauCuuucuu..... | 1   | 1 | seq |
| .....uaagaucaUguguagua.....          | 1   | 1 | seq |
| .....uaagaucaaguguagua.....          | 7   | 0 | seq |
| .....uaagaucaGguguaguau.....         | 1   | 1 | seq |
| .....uaagaucaaguguaguau.....         | 4   | 0 | seq |
| .....uaagaucaaguguaguauC.....        | 3   | 0 | seq |
| .....uaagaucaaguguaguUguC.....       | 1   | 1 | seq |
| .....uaagaucaaguguaguauC.....        | 109 | 0 | seq |
| .....uaUgaucaaguguaguauC.....        | 1   | 1 | seq |
| .....uaagaucaaguguaguaAcu.....       | 1   | 1 | seq |
| .....uaagaucaaguguaguauCG.....       | 1   | 1 | seq |
| .....uaagaucaaguguaguauCC.....       | 22  | 1 | seq |
| .....uaagaucaaguguaguauCA.....       | 1   | 1 | seq |
| .....uaagauCgaguguaguauC.....        | 1   | 1 | seq |
| .....uaagaucaaguguaguauCua.....      | 4   | 0 | seq |
| .....uaagaucaaguguaguauCC.....       | 1   | 1 | seq |
| .....uaagaucaaguguaguauCuuuc.....    | 1   | 0 | seq |
| .....uaagaucaaguguaguauCuuuc.....    | 2   | 0 | seq |
| .....aagaucaGguguaguau.....          | 1   | 1 | seq |
| .....aagaucaaguguaguau.....          | 4   | 0 | seq |
| .....aagaucaaguguaguaCC.....         | 1   | 1 | seq |
| .....aagaucaagAguaguauC.....         | 1   | 1 | seq |
| .....GagaucaaguguaguauC.....         | 1   | 1 | seq |
| .....aagaucaUguguaguauC.....         | 1   | 1 | seq |
| .....aagaucaaguguaguauCA.....        | 1   | 1 | seq |
| .....aagGucaaguguaguauC.....         | 1   | 1 | seq |
| .....aagaucaaguguaguauCG.....        | 1   | 1 | seq |
| .....aagaucaaguguaguauC.....         | 130 | 0 | seq |
| .....aagaucaagCguaguauC.....         | 1   | 1 | seq |
| .....aagaucaaguguaguauCC.....        | 17  | 1 | seq |
| .....aGgaucaaguguaguauC.....         | 2   | 1 | seq |
| .....aGgaucaaguguaguauCua.....       | 1   | 1 | seq |
| .....aagaucaaguguaguauCua.....       | 3   | 0 | seq |
| .....aagaucaaguguaguauCuuuc.....     | 1   | 0 | seq |
| .....agaucaaguguaguauC.....          | 4   | 0 | seq |
| .....agaucaaguguaguauC.....          | 36  | 0 | seq |
| .....agaucaaguguaguauCC.....         | 15  | 1 | seq |
| .....agaCcaaguguaguauC.....          | 1   | 1 | seq |
| .....agaucaaguguaguauCA.....         | 3   | 1 | seq |
| .....CgaucaaguguaguauC.....          | 1   | 1 | seq |
| .....agaucaaguguaguUucua.....        | 1   | 1 | seq |
| .....agaucaaguguaguauCua.....        | 5   | 0 | seq |
| .....agaucaaguguaguauCuuuc.....      | 1   | 0 | seq |
| .....gaAcaaguguaguauC.....           | 1   | 1 | seq |
| .....gaucaaguguaguauCC.....          | 153 | 1 | seq |
| .....gaucaagugCaguauC.....           | 1   | 1 | seq |
| .....gaucaaguguaguauC.....           | 955 | 0 | seq |
| .....gaucaaguguaguaCcu.....          | 1   | 1 | seq |

# Star Mature

|                                                                                                                        |    |   |     |
|------------------------------------------------------------------------------------------------------------------------|----|---|-----|
| ggagagagcgguacuagaaaaugggaaaagauagaaacgaaaaacc <u>auaccuuuucuugggccuuuuuggcuaagaucaaguguag</u> uauucuuauucaguuuaauaucu |    |   |     |
| .....gaucGaguguaguaucu.....                                                                                            | 4  | 1 | seq |
| .....gaucaaguguagAaucu.....                                                                                            | 1  | 1 | seq |
| .....gaucaaguguaguauCG.....                                                                                            | 18 | 1 | seq |
| .....gaucaagugGaguaucu.....                                                                                            | 1  | 1 | seq |
| .....Naucaaguguaguaucu.....                                                                                            | 1  | 1 | seq |
| .....gaucUaguguaguaucu.....                                                                                            | 1  | 1 | seq |
| .....gaucaagCguaguaucu.....                                                                                            | 3  | 1 | seq |
| .....gGucaaguguaguaucu.....                                                                                            | 4  | 1 | seq |
| .....gaucaaguguaguauCA.....                                                                                            | 17 | 1 | seq |
| .....gCucaaguguaguaucu.....                                                                                            | 1  | 1 | seq |
| .....gaucaaguguaguGUcu.....                                                                                            | 2  | 1 | seq |
| .....gaucaGguguaguaucu.....                                                                                            | 5  | 1 | seq |
| .....gaucaUguguaguaucu.....                                                                                            | 1  | 1 | seq |
| .....gaucaaguguaguauCUA.....                                                                                           | 32 | 0 | seq |
| .....gaucaaguguaguauCCua.....                                                                                          | 1  | 1 | seq |
| .....gaucaaguguUguauCUA.....                                                                                           | 1  | 1 | seq |
| .....gaucaaguguaguauCCa.....                                                                                           | 1  | 1 | seq |
| .....gaucaaguguaguauCU.....                                                                                            | 1  | 1 | seq |
| .....gaucaaguguaguauCGa.....                                                                                           | 1  | 1 | seq |
| .....gaucaaguguaguauCUauu.....                                                                                         | 2  | 0 | seq |
| .....gaucaaguguaguauCUauuc.....                                                                                        | 2  | 0 | seq |
| .....gaucaaguguaguauCUauucU.....                                                                                       | 1  | 0 | seq |
| .....aucaaguguaguauCUA.....                                                                                            | 5  | 0 | seq |
| .....aucaaguguaguauCU.....                                                                                             | 1  | 1 | seq |
| .....ucaaguguaguauCUauucUua.....                                                                                       | 1  | 0 | seq |
| .....ucaaguguaguauCUauucUuaucaguu.....                                                                                 | 1  | 0 | seq |
| .....aguaguauCUauucU.....                                                                                              | 3  | 0 | seq |
| .....aguaguauCUUuucU.....                                                                                              | 1  | 1 | seq |
| .....aguaguauCUauucUuauc.....                                                                                          | 1  | 0 | seq |
| .....aguaguauCUauucUuaucag.....                                                                                        | 1  | 0 | seq |
| .....aguaguauCUauucUuaucagu.....                                                                                       | 1  | 0 | seq |
| .....aguaguauCUauucUuaucaguu.....                                                                                      | 2  | 0 | seq |
| .....aguaguauCUauucUuaucaguuu.....                                                                                     | 1  | 0 | seq |
| .....uguaguauCUauucUuauc.....                                                                                          | 1  | 0 | seq |
| .....uguaguauCUauucCUaucaguu.....                                                                                      | 1  | 1 | seq |
| .....uucuuauCaguuuaaua.....                                                                                            | 1  | 0 | seq |
| .....uucuuauCaguuuaauauc.....                                                                                          | 1  | 0 | seq |
| .....ucuuauCaguuuaauauc.....                                                                                           | 1  | 0 | seq |
| .....uuauCaguuuaauaucu.....                                                                                            | 3  | 0 | seq |

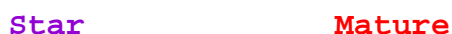

| 5'                                                                                                                   | -3'   | obs |        |
|----------------------------------------------------------------------------------------------------------------------|-------|-----|--------|
|                                                                                                                      |       | exp |        |
| acauucuccauugaagagggggaggggcgugauccuugcgggugcgaucauacuaagcguaauggcaccgguaucccaucaagaacuccgcgaauuaagcgugcuugggcuag    | reads | mm  | sample |
| acauucuccauugaagagggggaggggcgugauccuugcgggugcgaucauacuaagcguaauggcaccgguaucccaucaagaacuccgcgaauuaagcgugcuugggcuag    | 4     | 1   | seq    |
| ...(((((((.....))))))(((.....(((((((.....(((((((.....)))).....)))).....)))).....)))).....)))).....)))).....))))..... | 1     | 0   | seq    |
| .....gcgggugcgaucauacA.....                                                                                          | 1     | 0   | seq    |
| .....gcgggugcgaucauacu.....                                                                                          | 2     | 0   | seq    |
| .....gggugcgaucauacuag.....                                                                                          | 4     | 0   | seq    |
| .....gggugcgaucauacuagcg.....                                                                                        | 2     | 1   | seq    |
| .....gggugcgaucauacuagcgua.....                                                                                      | 1     | 0   | seq    |
| .....gggugcgaucauacuagcguaau.....                                                                                    | 1     | 0   | seq    |
| .....gggugcgaucauacAagcguaaugg.....                                                                                  | 1     | 1   | seq    |
| .....gggugcgaucauacuagcguaauggca.....                                                                                | 1     | 0   | seq    |
| .....gggugcgaucauacCagcguaauggcaccguaucccaucaagaacuc.....                                                            | 1     | 1   | seq    |
| .....gggugcgaucauacuagcg.....                                                                                        | 1     | 0   | seq    |
| .....Ngugcgaucauacuagcgua.....                                                                                       | 1     | 1   | seq    |
| .....ggugcgaucauacAagcguaa.....                                                                                      | 1     | 1   | seq    |
| .....gugcgaucauacuagcgua.....                                                                                        | 2     | 0   | seq    |
| .....gugcgaucauacuagcguaC.....                                                                                       | 1     | 1   | seq    |
| .....gugcgaucauacCagcguaauggcaccgu.....                                                                              | 1     | 1   | seq    |
| .....cgaucauacuagcgua.....                                                                                           | 1     | 0   | seq    |
| .....cgaucauacuagcguaauggcacc.....                                                                                   | 1     | 0   | seq    |
| .....cgaucauacCagcguaauggcaccgu.....                                                                                 | 1     | 1   | seq    |
| .....aucauacuagcguaaugg.....                                                                                         | 1     | 0   | seq    |
| .....guuaauggcaccguauccc.....                                                                                        | 1     | 0   | seq    |
| .....guuaauggcaccguaucccaucaagaacuccgcga.....                                                                        | 1     | 0   | seq    |
| .....uuuaauggcaccguaucccauca.....                                                                                    | 1     | 0   | seq    |
| .....uuuaauggcaccguaucccaucaagaacuccgcga.....                                                                        | 1     | 0   | seq    |
| .....uaauggcaccguaucccaucaagaacuccgcga.....                                                                          | 1     | 0   | seq    |
| .....aaugcaccguaucccaucaagaacucc.....                                                                                | 1     | 0   | seq    |
| .....aaugcaccguaucccaucaagaacuccg.....                                                                               | 1     | 0   | seq    |
| .....aaugGccguaucccaucaagaacuccgcga.....                                                                             | 1     | 1   | seq    |
| .....aaugcaccguaucccaucaagaacuccgcga.....                                                                            | 1     | 0   | seq    |
| .....augcaccguaucccauc.....                                                                                          | 3     | 0   | seq    |
| .....augcaccguaucccauca.....                                                                                         | 1     | 0   | seq    |
| .....augcaccguaucccaucaagaacu.....                                                                                   | 1     | 0   | seq    |

## Star

## Mature

acauucuccauugaagaggggagggggcgugauccuu~~gcgggugcgaucauacuagcggu~~aaugcaccguaucccaucagaaacuccgcaauuaagcgugcuugggcuag

|                                                                     |      |   |     |
|---------------------------------------------------------------------|------|---|-----|
| .....augcaccg <u>ua</u> ucccaucaga <u>aacucc</u> .....              | 1    | 0 | seq |
| .....augcaccg <u>ua</u> ucccaucaga <u>aacuccgc</u> .....            | 1    | 0 | seq |
| .....augcaccg <u>ua</u> ucccaucaga <u>aacuccgca</u> .....           | 1    | 0 | seq |
| .....ugcaccg <u>ua</u> ucccau <u>ca</u> .....                       | 3    | 0 | seq |
| .....ugcaccg <u>ua</u> ucccau <u>caga</u> .....                     | 1    | 0 | seq |
| .....ugcaccg <u>ua</u> ucccau <u>cagaa</u> .....                    | 1    | 0 | seq |
| .....ugcaccg <u>ua</u> ucccau <u>caga</u> aac.....                  | 1    | 0 | seq |
| .....ugcaccg <u>ua</u> ucccau <u>caga</u> aacucc.....               | 2    | 0 | seq |
| .....ugcaccg <u>ua</u> ucccau <u>caga</u> aacuccg.....              | 1    | 0 | seq |
| .....ugcaccg <u>ua</u> ucccau <u>caga</u> aacuA <u>cg</u> .....     | 1    | 1 | seq |
| .....ugcaccg <u>ua</u> ucccau <u>caga</u> aacuccg <u>ca</u> .....   | 6    | 0 | seq |
| .....gcaccg <u>ua</u> ucccau <u>caga</u> aa.....                    | 1    | 0 | seq |
| .....gcaccg <u>ua</u> ucccau <u>caga</u> aacucc.....                | 1    | 0 | seq |
| .....gcaccg <u>ua</u> ucccau <u>caga</u> aacuccg.....               | 2    | 0 | seq |
| .....caccg <u>ua</u> ucccau <u>caga</u> .....                       | 1    | 0 | seq |
| .....caccg <u>ua</u> ucccau <u>caga</u> aacu.....                   | 1    | 0 | seq |
| .....caccg <u>ua</u> ucccau <u>caga</u> aacucc.....                 | 1    | 0 | seq |
| .....caccg <u>ua</u> ucccau <u>caga</u> aacuA.....                  | 1    | 1 | seq |
| .....caccg <u>ua</u> ucccau <u>caga</u> aacuccg.....                | 1    | 0 | seq |
| .....accg <u>ua</u> ucccau <u>caga</u> aacu.....                    | 1    | 0 | seq |
| .....accg <u>ua</u> ucccau <u>caga</u> aacucc.....                  | 3    | 0 | seq |
| .....ccg <u>ua</u> ucccau <u>caga</u> aacC.....                     | 1    | 1 | seq |
| .....ccg <u>ua</u> ucccau <u>caga</u> aacu.....                     | 3    | 0 | seq |
| .....ccg <u>ua</u> ucccau <u>caga</u> aacu.....                     | 1    | 0 | seq |
| .....ccg <u>ua</u> ucccau <u>caga</u> aacucc.....                   | 1    | 0 | seq |
| .....ccg <u>ua</u> ucccau <u>caga</u> aacuccg.....                  | 1    | 0 | seq |
| .....ccg <u>ua</u> ucccau <u>caga</u> aacuccC <u>ca</u> .....       | 1    | 1 | seq |
| .....ccg <u>ua</u> ucccau <u>caga</u> aacuccg <u>ca</u> .....       | 1    | 0 | seq |
| .....cg <u>ua</u> ucccau <u>caga</u> aacucc.....                    | 1    | 0 | seq |
| .....cg <u>ua</u> ucccau <u>caga</u> aacuccg.....                   | 1    | 0 | seq |
| .....cg <u>ua</u> ucccau <u>caga</u> aacuccgC <u>ca</u> .....       | 1    | 1 | seq |
| .....cg <u>ua</u> ucccau <u>caga</u> aacuccg <u>ca</u> .....        | 1    | 0 | seq |
| .....cg <u>ua</u> ucccau <u>caga</u> aacuccgC <u>ca</u> .....       | 1    | 1 | seq |
| .....cg <u>ua</u> ucccau <u>caga</u> aacuccgC <u>ca</u> .....       | 3    | 0 | seq |
| .....cg <u>ua</u> ucccau <u>caga</u> aacuccgC <u>ca</u> .....       | 1    | 1 | seq |
| .....uaucccau <u>caga</u> aacucc.....                               | 1    | 0 | seq |
| .....uaucccau <u>caga</u> aacuccg.....                              | 3    | 0 | seq |
| .....Naucccau <u>caga</u> aacuccg.....                              | 4    | 1 | seq |
| .....uaucccau <u>caga</u> aacuccg.....                              | 3    | 0 | seq |
| .....Naucccau <u>caga</u> aacuccg.....                              | 8    | 1 | seq |
| .....uaucccau <u>caga</u> aacuccgC <u>ca</u> .....                  | 8    | 0 | seq |
| .....Naucccau <u>caga</u> aacuccgC <u>ca</u> .....                  | 6    | 1 | seq |
| .....uaucccau <u>caga</u> aacuccgC <u>ca</u> Guuaag <u>cg</u> ..... | 1    | 1 | seq |
| .....aCcccau <u>caga</u> aacuccg.....                               | 8    | 1 | seq |
| .....Nucccau <u>caga</u> aacuccg.....                               | 3    | 1 | seq |
| .....Cucccau <u>caga</u> aacuccg.....                               | 2    | 1 | seq |
| .....aucccau <u>caga</u> aacC <u>cg</u> .....                       | 6    | 1 | seq |
| .....aucccC <u>caga</u> aacuccg.....                                | 1    | 1 | seq |
| .....aucccau <u>caga</u> aacuccg.....                               | 2403 | 0 | seq |
| .....aucccU <u>caga</u> aacuccg.....                                | 1    | 1 | seq |
| .....aucccau <u>caga</u> aacuccgC.....                              | 1092 | 0 | seq |
| .....aucccau <u>caga</u> aaGu <u>ccg</u> C.....                     | 1    | 1 | seq |
| .....aucccau <u>caga</u> aaC <u>g</u> aacuccgC.....                 | 1    | 1 | seq |
| .....aucccau <u>caga</u> aaC <u>cg</u> C.....                       | 2    | 1 | seq |
| .....aucccau <u>caga</u> aacuccgG.....                              | 4    | 1 | seq |
| .....aucccau <u>caga</u> U <u>c</u> uccgC.....                      | 1    | 1 | seq |
| .....aCcccau <u>caga</u> aacuccgC.....                              | 6    | 1 | seq |
| .....aucccau <u>caga</u> aacuccgC <u>G</u> .....                    | 131  | 1 | seq |
| .....aucccau <u>caga</u> aacuccgC <u>C</u> .....                    | 10   | 1 | seq |
| .....auGcccau <u>caga</u> aacuccgC <u>ca</u> .....                  | 2    | 1 | seq |
| .....aucccau <u>caga</u> aaC <u>g</u> aacuccgC <u>ca</u> .....      | 1    | 1 | seq |
| .....Cucccau <u>caga</u> aacuccgC <u>ca</u> .....                   | 1    | 1 | seq |
| .....aucccau <u>caga</u> aacuccgG <u>a</u> .....                    | 3    | 1 | seq |
| .....aucccau <u>caga</u> aaC <u>cg</u> C <u>ca</u> .....            | 9    | 1 | seq |
| .....aucccau <u>caga</u> aacuccgC <u>U</u> .....                    | 25   | 1 | seq |
| .....Nucccau <u>caga</u> aacuccgC <u>ca</u> .....                   | 8    | 1 | seq |
| .....aCcccau <u>caga</u> aacuccgC <u>ca</u> .....                   | 14   | 1 | seq |
| .....aucccau <u>caga</u> U <u>c</u> uccgC <u>ca</u> .....           | 2    | 1 | seq |
| .....aucccU <u>caga</u> aacuccgC <u>ca</u> .....                    | 1    | 1 | seq |
| .....aucccau <u>caga</u> aaA <u>u</u> ccgC <u>ca</u> .....          | 1    | 1 | seq |
| .....aucccau <u>caga</u> aacuccgC <u>ca</u> .....                   | 3502 | 0 | seq |
| .....aucccau <u>caga</u> aacuccgC <u>caa</u> .....                  | 41   | 0 | seq |
| .....aucccau <u>caga</u> aacuccgC <u>Ca</u> .....                   | 1    | 1 | seq |



## Star

## Mature

acauucuccauugaagaggggagggggcgugaucuu<sup>g</sup>cgggugcgaucauacuagcggu<sup>aaug</sup>caccgu<sup>au</sup>ucccaucaga<sup>aac</sup>ucgcga<sup>auuaag</sup>cgugcuugggcuag

|                                  |       |   |     |
|----------------------------------|-------|---|-----|
| .....aucccaucagaacuccgcaau.....  | 1     | 0 | seq |
| .....aucccaucagaacuccgcaauu..... | 1     | 0 | seq |
| .....Ccccaucagaacuccgc.....      | 9     | 1 | seq |
| .....ucccaucCgaacuccgc.....      | 2     | 1 | seq |
| .....ucccaucagaacuccgG.....      | 21    | 1 | seq |
| .....Ncccaucagaacuccgc.....      | 9     | 1 | seq |
| .....ucccaucagaacuccgc.....      | 4808  | 0 | seq |
| .....ucccUucagaacuccgc.....      | 1     | 1 | seq |
| .....ucccaucagaacCccgc.....      | 11    | 1 | seq |
| .....ucccaAcagaacuccgc.....      | 1     | 1 | seq |
| .....ucccUucagaacuccgca.....     | 7     | 1 | seq |
| .....ucccCucagaacuccgca.....     | 5     | 1 | seq |
| .....ucccaucagaacuccgcU.....     | 104   | 1 | seq |
| .....Ccccaucagaacuccgca.....     | 59    | 1 | seq |
| .....ucccaucagaacUcgcga.....     | 3     | 1 | seq |
| .....ucccaAcagaacuccgca.....     | 3     | 1 | seq |
| .....ucccaGcagaacuccgca.....     | 1     | 1 | seq |
| .....ucccaucCgaacuccgca.....     | 2     | 1 | seq |
| .....ucccaucagaacuccgGa.....     | 10    | 1 | seq |
| .....ucccaucagaacuccgcG.....     | 596   | 1 | seq |
| .....ucccaucagaacCccgca.....     | 27    | 1 | seq |
| .....ucccaucagaCuccgca.....      | 5     | 1 | seq |
| .....ucccaucagaacuccgcC.....     | 44    | 1 | seq |
| .....Ncccaucagaacuccgca.....     | 24    | 1 | seq |
| .....uGcccaucagaacuccgca.....    | 2     | 1 | seq |
| .....ucccaucagaacuccgca.....     | 15385 | 0 | seq |
| .....uNcccaucagaacuccgca.....    | 1     | 1 | seq |
| .....ucccaucagaUcuccgcaa.....    | 1     | 1 | seq |
| .....ucccaucagaacuccgcCa.....    | 3     | 1 | seq |
| .....ucccaucagaacUcgcgcaa.....   | 1     | 1 | seq |
| .....ucccaucagaacuccgcUa.....    | 2     | 1 | seq |
| .....ucccaucagaacuccgcaa.....    | 99    | 0 | seq |
| .....ucccaucagaacUcAgcaa.....    | 1     | 1 | seq |
| .....ucccaucagaacuccgcGa.....    | 3     | 1 | seq |
| .....ucccaucagaacuccgcaau.....   | 1     | 0 | seq |
| .....ucccaucagaacuccgcaauu.....  | 2     | 0 | seq |
| .....cccaucagaacuccgGa.....      | 3     | 1 | seq |
| .....cccaucagaacCccgca.....      | 24    | 1 | seq |
| .....Ncccaucagaacuccgca.....     | 18    | 1 | seq |
| .....cccaucagaacuccgca.....      | 11901 | 0 | seq |
| .....cccaucagaacuccgcU.....      | 81    | 1 | seq |
| .....cccaucagaacuccgcG.....      | 452   | 1 | seq |
| .....cccaucCgaacuccgca.....      | 2     | 1 | seq |
| .....cccUucagaacuccgca.....      | 3     | 1 | seq |
| .....cccCucagaacuccgca.....      | 8     | 1 | seq |
| .....cccaucagaacUcAgca.....      | 2     | 1 | seq |
| .....cccaucaCaacuccgca.....      | 1     | 1 | seq |
| .....Gcccaucagaacuccgca.....     | 28    | 1 | seq |
| .....cccaucagCacuccgca.....      | 1     | 1 | seq |
| .....cccaAcagaacuccgca.....      | 3     | 1 | seq |
| .....cccaGcagaacuccgca.....      | 1     | 1 | seq |
| .....cccaucagaacuccgcC.....      | 36    | 1 | seq |
| .....cccaucagaacuccgcCa.....     | 3     | 1 | seq |
| .....cccaucagaacuccgcUa.....     | 3     | 1 | seq |
| .....cccaucagaacUcAgcaa.....     | 1     | 1 | seq |
| .....cccaucagaacuccgcaa.....     | 78    | 0 | seq |
| .....cccaucagaacuccgcaau.....    | 2     | 0 | seq |
| .....cccaucagaacuccgcaaG.....    | 2     | 1 | seq |
| .....cccaucagaacuccgcaaC.....    | 1     | 1 | seq |
| .....cccaucagaGcuccgcaau.....    | 1     | 1 | seq |
| .....cccaucagaacuccgcaauu.....   | 3     | 0 | seq |
| .....cccaucagaacuccgcaauuG.....  | 2     | 1 | seq |
| .....ccaucagaacuccgAaa.....      | 1     | 1 | seq |
| .....ccaucagaacuccgcCa.....      | 1     | 1 | seq |
| .....ccaucagaacuccgcaa.....      | 49    | 0 | seq |
| .....ccaucagaacuccgcaau.....     | 1     | 0 | seq |
| .....ccaucagaacuccgcCau.....     | 1     | 1 | seq |
| .....ccaucagaacuccgcaauua.....   | 1     | 0 | seq |
| .....ccaucagaacuccgcaauuaa.....  | 1     | 0 | seq |
| .....caucagaacuccgcaaC.....      | 1     | 1 | seq |

Star

**Mature**

acaauucuccauugaagagggggagggggcgugaucuugcgggugcgaucaucuagcguuaaugcaccguaucccaucagaacuccgcaauuaagcgugcuuugggcuag  
 .....caucagaacuccgcaaGu.....  
 .....caucagaacuccgcaCuuaagc.....  
 .....aucagaacuccgcaauC.....  
 .....aucagaacuccgcaaAua.....  
 .....aucagaacuccgcauuG.....  
 .....ucagaacuccgcauuuA.....  
 .....ucagaacuccgcauuuaagcg.....  
 .....cagaacuccgcauuuaag.....  
 .....uuuagcgugcuuugggcu.....  
 .....uuuagcgugcuuugggcuA.....  
 .....uuagcgugcuuugggcuag.....  
 .....aagcgugcuuugggcuag.....

[illegible]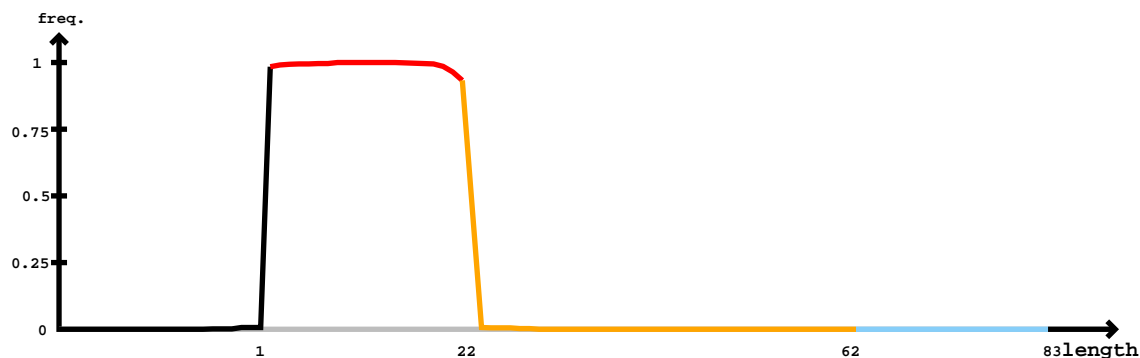

Star

| 5'                                                                                                                                             | exp |       |    |
|------------------------------------------------------------------------------------------------------------------------------------------------|-----|-------|----|
| ugccaugccagcaauucuga <u>uaaugcuuacccucaa</u> ugcccauuuuu <u>uaacaccccauuu</u> ca <u>cuucuuacagau</u> ugga <u>cagugaggggugaagcauu</u> acagaauua | -3' | reads | mm |
| .....(((((((.(((((((((((((((((.((.(((((((.....)))))).)).)))))))))))))))))))))).                                                                |     | 1     | 0  |
| .....uucugauaaugcuuacccuc.....                                                                                                                 |     | 1     | 1  |
| .....ugauaaCgcuuacccu.....                                                                                                                     |     | 1     | 1  |
| .....ugauaaCgcuuacccuca.....                                                                                                                   |     | 1     | 1  |
| .....ugCuaaugcuuacccucaau.....                                                                                                                 |     | 1     | 1  |
| .....ugCuaaugcuuacccucaaug.....                                                                                                                |     | 1     | 1  |
| .....uaaugcuGcaccucaaa.....                                                                                                                    |     | 1     | 1  |
| .....uaaugcuuacccucaaaC.....                                                                                                                   |     | 1     | 1  |
| .....uaaugcuuacccucaau.....                                                                                                                    |     | 5     | 0  |
| .....uaaugcuuacccucaauA.....                                                                                                                   |     | 3     | 1  |
| .....uaaugcuuacccucaauU.....                                                                                                                   |     | 5     | 1  |
| .....uaaugcuuacccucaaug.....                                                                                                                   |     | 6     | 0  |
| .....uaaugcuuacccucaaugU.....                                                                                                                  |     | 5     | 1  |
| .....uaaugcuuacccucaaugA.....                                                                                                                  |     | 1     | 1  |
| .....uaaugcuuacccucaaaCgc.....                                                                                                                 |     | 1     | 1  |
| .....uaaugcuuacccucaaugc.....                                                                                                                  |     | 16    | 0  |
| .....uaaugcuuacccucaaugcc.....                                                                                                                 |     | 495   | 0  |
| .....uaaugcuuacccucaaugcc.....                                                                                                                 |     | 1     | 1  |
| .....uaGugcuuacccucaaugcc.....                                                                                                                 |     | 1     | 1  |
| .....uaaugcuCaccucaaugcc.....                                                                                                                  |     | 1     | 1  |
| .....Caugcuuacccucaaugcc.....                                                                                                                  |     | 1     | 1  |
| .....uaaCgcuuacccucaaugcc.....                                                                                                                 |     | 2     | 1  |
| .....uaaugcuuGaccucaaugcc.....                                                                                                                 |     | 2     | 1  |
| .....uaaugcuuacccucaaugcG.....                                                                                                                 |     | 5     | 1  |
| .....uaaugcuuacccucaGugcc.....                                                                                                                 |     | 1     | 1  |
| .....uaaugcuuacccucaauAcc.....                                                                                                                 |     | 2     | 1  |
| .....uaauAcuuacccucaaugcc.....                                                                                                                 |     | 2     | 1  |
| .....uGaugcuuacccucaaugcc.....                                                                                                                 |     | 1     | 1  |
| .....uCaugcuuacccucaaugcc.....                                                                                                                 |     | 1     | 1  |
| .....uaaugcuuacccucaaugcc.....                                                                                                                 |     | 1     | 1  |
| .....uaaugcuuacccucaaugcU.....                                                                                                                 |     | 127   | 1  |
| .....uaaugcuuacccucaaugcA.....                                                                                                                 |     | 41    | 1  |
| .....uaaugcuuacccucaaugcc.....                                                                                                                 |     | 1     | 1  |
| .....uaaugcCucaccucaaugcc.....                                                                                                                 |     | 2     | 1  |
| .....uaaugcuuacccCcaaugcc.....                                                                                                                 |     | 2     | 1  |

## Mature

## Star

ugccaugccagcaauucugauaaugcuucacccucaaagccc aaauuuuaauuuacacccauuucacuuucacagauugga cagugagggugaagcauuacagaauua

|                                   |   |   |     |
|-----------------------------------|---|---|-----|
| .....uaaugcuGcaccucaaagcc.....    | 1 | 1 | seq |
| .....uaaugcuucacccucaaagUc.....   | 2 | 1 | seq |
| .....uaaugUuucacccucaaagcc.....   | 1 | 1 | seq |
| .....Naaugcuucacccucaaagcc.....   | 2 | 1 | seq |
| .....uaaugcuucGcccucaaagcc.....   | 1 | 1 | seq |
| .....uaaugcuucacccucaaagccA.....  | 1 | 1 | seq |
| .....uaaugcuucacccucaaagccU.....  | 2 | 1 | seq |
| .....uaaugcuucacccucaaagcccC..... | 1 | 1 | seq |
| .....aaugcuucacccucaaag.....      | 1 | 0 | seq |
| .....aaugcuucacccucaaagcc.....    | 2 | 0 | seq |
| .....aaugcuucacccucaaagUgccc..... | 1 | 1 | seq |
| .....aaugcuucacccucaaagccU.....   | 1 | 1 | seq |
| .....augcuucacccucaaagc.....      | 1 | 0 | seq |
| .....augcuucacccucaaagU.....      | 1 | 1 | seq |
| .....ugcuucacccucaaagcc.....      | 1 | 0 | seq |
| .....cuucacccucaaagcccaGuu.....   | 1 | 1 | seq |
| .....ucacccucaaagcccaauu.....     | 1 | 0 | seq |
| .....Ncaccucaaagcccauuuu.....     | 1 | 1 | seq |
| .....ucacccucaaagcccauuuu.....    | 1 | 0 | seq |

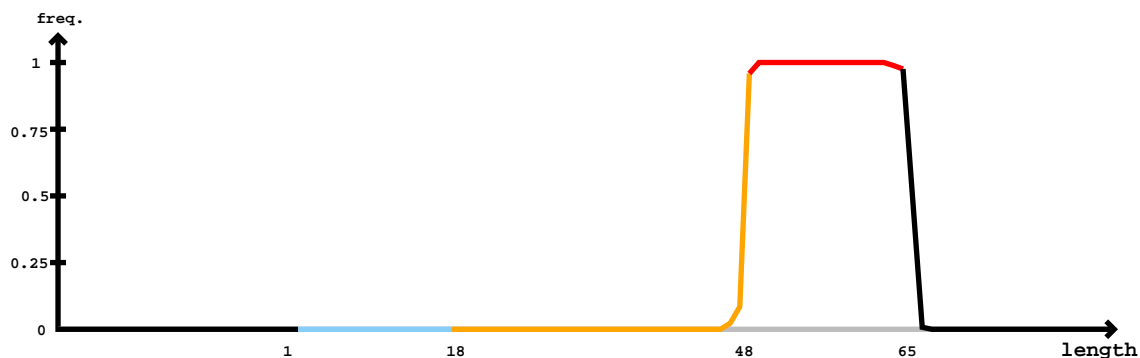

## Mature

Star

Mature

gagauuccaaaagccugaccugagcugagaaggcuaugaguuuugauacuggggaaggguaucaaacaaacuucgugggagaccugggcuagguggguguggggaaaaauuc



|                                                                                                                 | -3'   | obs |        |
|-----------------------------------------------------------------------------------------------------------------|-------|-----|--------|
|                                                                                                                 |       | exp |        |
|                                                                                                                 | reads | mm  | sample |
| auuagauuuucauucaggguuuggggaaccaucuccucauaugagaauuuauucucuugaauacgcgcaauuggucucugauaauuuugaauucuaucaguguauugaaga |       |     |        |
| auuagauuuucauucaggguuuggggaaccaucuccucauaugagaauuuauucucuugaauacgcgcaauuggucucugauaauuuugaauucuaucaguguauugaaga |       |     |        |
| .(((.....(((((((((((((.....(((.....))))).))).....)))).))).))))..)                                               |       |     |        |
| .....auucaaggAuaugggaa.....                                                                                     | 1     | 1   | seq    |
| .....Ugguuuuggggaaccauc.....                                                                                    | 1     | 1   | seq    |
| .....aucucuugaauacacgcC.....                                                                                    | 1     | 1   | seq    |
| .....Cuuggucucugauaauuuu.....                                                                                   | 1     | 1   | seq    |
| .....uuggucucugauaauuu.....                                                                                     | 1     | 0   | seq    |
| .....uuggucucugauaauuu.....                                                                                     | 1     | 0   | seq    |
| .....uuggucucugauaauuuug.....                                                                                   | 2     | 0   | seq    |
| .....uuggucucugauaauuuugC.....                                                                                  | 2     | 1   | seq    |
| .....uuggucucugauaauuuugCa.....                                                                                 | 4     | 1   | seq    |
| .....uggucucugauaauuuu.....                                                                                     | 28    | 0   | seq    |
| .....uggucucugauGucuuu.....                                                                                     | 1     | 1   | seq    |
| .....uggucCugauaauuuu.....                                                                                      | 1     | 1   | seq    |
| .....uggucucugauaauuuC.....                                                                                     | 4     | 1   | seq    |
| .....uGaucucugauaauuuug.....                                                                                    | 1     | 1   | seq    |
| .....uggucucugauaauuuug.....                                                                                    | 29    | 0   | seq    |
| .....uggucucugauaauuuuA.....                                                                                    | 2     | 1   | seq    |
| .....uggucucugauaauuuuga.....                                                                                   | 1     | 0   | seq    |
| .....uggucucugauaauuuugC.....                                                                                   | 11    | 1   | seq    |
| .....uggucucugauaauuuugU.....                                                                                   | 3     | 1   | seq    |
| .....uggucucugauaauuuugCa.....                                                                                  | 5     | 1   | seq    |
| .....uggucucugauaauuuugUau.....                                                                                 | 2     | 1   | seq    |
| .....ggucucugauaauuuugU.....                                                                                    | 1     | 1   | seq    |
| .....ggucucugauaauuuugC.....                                                                                    | 1     | 1   | seq    |
| .....gucucugauaauuuugU.....                                                                                     | 1     | 1   | seq    |
| .....ucugauaauuCugaauuc.....                                                                                    | 1     | 1   | seq    |

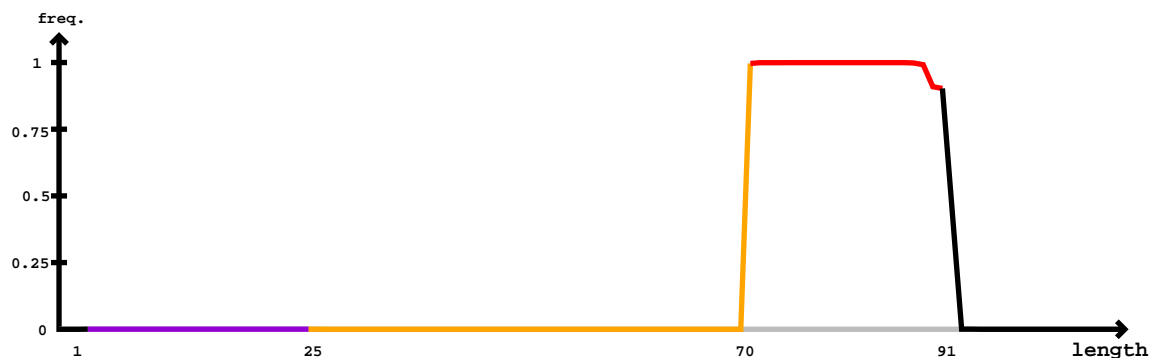

## Mature

| 5' | uucucagcagauuuauuccccgacuuuuacauagccagagugcuuguauaauaacaccagguuuguagggguuggggauuuauuuugcucagaaguuugaagucggaauuuacu | -3'   | obs |        |
|----|--------------------------------------------------------------------------------------------------------------------|-------|-----|--------|
|    | uucucagcagauuuauuccccgacuuuuacauagccagagugcuuguauaauaacaccagguuuguagggguuggggauuuauuuugcucagaaguuugaagucggaauuuacu |       | exp |        |
|    | (((((((((((((((((((((((((((((((((((((((((((((((((((((((((((((((((((((((((((((((((((((((((((((((((((((((((((((((((  | reads | mm  | sample |
|    | .ucuGagcagauuuauuccccgacuuuuacauagccagagugcuuguauaauaacaccagguuuguagggguuggggauuuauuuugcucagaaguuugaagucggaauuuacu | 2     | 1   | seq    |
|    | .....Agggauuuauuuugcucaga.....                                                                                     | 5     | 1   | seq    |
|    | .....ggggauuuauuuugcucag.....                                                                                      | 2     | 0   | seq    |
|    | .....Agggauuuauuuugcucag.....                                                                                      | 25    | 1   | seq    |
|    | .....ggggauuuauuuugcucaga.....                                                                                     | 5     | 0   | seq    |
|    | .....Ngggauuuauuuugcucaga.....                                                                                     | 1     | 1   | seq    |
|    | .....Agggauuuauuuugcucaga.....                                                                                     | 332   | 1   | seq    |
|    | .....Agggauuuauuuugcucagaa.....                                                                                    | 27    | 1   | seq    |
|    | .....ggggauuuauuuugcucagaag.....                                                                                   | 18    | 0   | seq    |
|    | .....Agggauuuauuuugcucagaag.....                                                                                   | 3722  | 1   | seq    |
|    | .....Ugggauuuauuuugcucagaag.....                                                                                   | 6     | 1   | seq    |
|    | .....Cgggauuuauuuugcucagaag.....                                                                                   | 3     | 1   | seq    |
|    | .....Ngggauuuauuuugcucagaag.....                                                                                   | 5     | 1   | seq    |
|    | .....Agggauuuauuuugcucagaagu.....                                                                                  | 20    | 1   | seq    |
|    | .....Agggauuuauuuugcucagaaguug.....                                                                                | 1     | 1   | seq    |
|    | .....ggggauuuauuuugcucagaaguU.....                                                                                 | 1     | 1   | seq    |
|    | .....gggauuuauuuugcucaga.....                                                                                      | 8     | 0   | seq    |
|    | .....gggauuuauuuugcucagaag.....                                                                                    | 4     | 0   | seq    |
|    | .....auuuuuuugcucagaagA.....                                                                                       | 1     | 1   | seq    |



Provisional ID : MA\_400320\_31987  
 Score total : 7.9  
 Score for star read(s) : 3.9  
 Score for read counts : 7.3  
 Score for mfe : -1  
 Score for randfold : -2.2  
 Score for cons. seed :  
 Total read count : 26  
 Mature read count : 25  
 Loop read count : 0  
 Star read count : 1

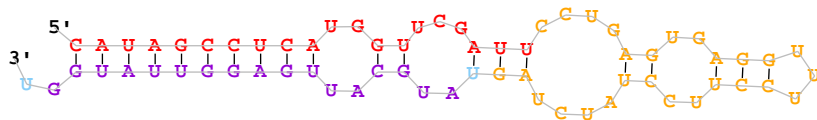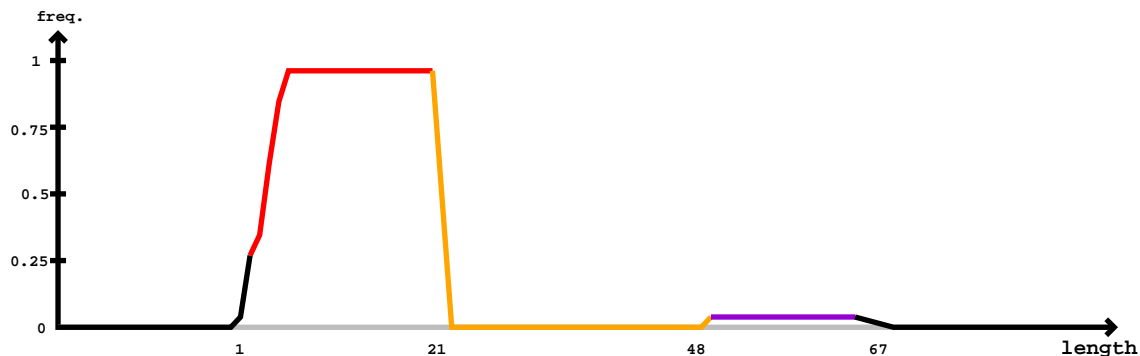

### Mature

### Star

| 5' - |  | -3'   | obs |        |  |
|------|--|-------|-----|--------|--|
|      |  |       | exp |        |  |
|      |  | reads | mm  | sample |  |
|      |  | 1     | 1   | seq    |  |
|      |  | 6     | 1   | seq    |  |
|      |  | 2     | 0   | seq    |  |
|      |  | 5     | 0   | seq    |  |
|      |  | 2     | 1   | seq    |  |
|      |  | 5     | 0   | seq    |  |
|      |  | 1     | 1   | seq    |  |
|      |  | 3     | 1   | seq    |  |
|      |  | 1     | 1   | seq    |  |

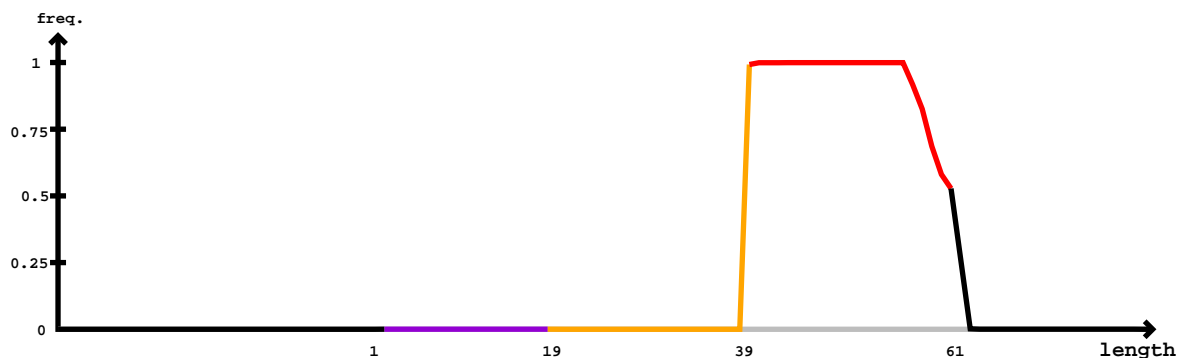

## Mature

| 5' -                                                                                                              | -3'   | obs |        |
|-------------------------------------------------------------------------------------------------------------------|-------|-----|--------|
|                                                                                                                   |       | exp |        |
| aguagauaaccuguuagauaggcggaagaaauuuuacacauuagaggccaaaauagaaucagauuuuuucggccucgaauguuaggagaauguuuuccucuaaccuaagca   |       |     |        |
| aguagauaaccuguuagauaggcggaagaaauuuuacacauuagaggccaaaauagaaucagauuuuuucggccucgaauguuaggagaauguuuuccucuaaccuaagca   |       |     |        |
| .....(((((((.....(((((((((((((((((((((((((((((((((((((((((((((((((((((((((((((((((((((((((((((((((((((((((((((((( | reads | mm  | sample |
| .....cuucaacauuagaggccG.....                                                                                      | 1     | 1   | seq    |
| .....ucggccucgaaauuuuag.....                                                                                      | 1     | 1   | seq    |
| .....ucggccUucgaauguuag.....                                                                                      | 1     | 1   | seq    |
| .....ucggccucgaauguuag.....                                                                                       | 301   | 0   | seq    |
| .....uUggccucgaauguuag.....                                                                                       | 1     | 1   | seq    |
| .....ucggccucgaauguuAA.....                                                                                       | 6     | 1   | seq    |
| .....ucggccucgaauguuAU.....                                                                                       | 1     | 1   | seq    |
| .....UGggccucgaauguuag.....                                                                                       | 1     | 1   | seq    |
| .....ucggccucgaGuguuag.....                                                                                       | 1     | 1   | seq    |
| .....ucAgccucgaauguuag.....                                                                                       | 1     | 1   | seq    |
| .....Cggccucgaauguuag.....                                                                                        | 1     | 1   | seq    |
| .....ucggccucgaauguCag.....                                                                                       | 2     | 1   | seq    |
| .....ucAgccucgaauguuagg.....                                                                                      | 1     | 1   | seq    |
| .....ucggccucgaaauuuuagg.....                                                                                     | 1     | 1   | seq    |
| .....ucggccucgaauguuagAA.....                                                                                     | 25    | 1   | seq    |
| .....ucggccucgaaCguuagg.....                                                                                      | 2     | 1   | seq    |
| .....ucggccucgaGuguuagg.....                                                                                      | 1     | 1   | seq    |
| .....ucggccucgaauguuagU.....                                                                                      | 2     | 1   | seq    |
| .....ucggccucgaauguuagC.....                                                                                      | 4     | 1   | seq    |
| .....ucggccucgaauguuGgg.....                                                                                      | 3     | 1   | seq    |
| .....ucggccucgaauguuagg.....                                                                                      | 311   | 0   | seq    |
| .....Acggccucgaauguuagg.....                                                                                      | 1     | 1   | seq    |
| .....uUggccucgaauguuagg.....                                                                                      | 2     | 1   | seq    |
| .....ucggccucgaaCguuagga.....                                                                                     | 1     | 1   | seq    |
| .....ucggccucgaauguuaggU.....                                                                                     | 4     | 1   | seq    |
| .....ucggccucgaauguuGgga.....                                                                                     | 2     | 1   | seq    |
| .....ucggccuUgaauguuagga.....                                                                                     | 1     | 1   | seq    |
| .....ucgAccucgaauguuagga.....                                                                                     | 1     | 1   | seq    |
| .....Acggccucgaauguuagga.....                                                                                     | 1     | 1   | seq    |
| .....ucggccucgaauguuAAga.....                                                                                     | 1     | 1   | seq    |
| .....ucggccucgUauguuagga.....                                                                                     | 1     | 1   | seq    |
| .....ucggccucgaaugCuagga.....                                                                                     | 2     | 1   | seq    |
| .....ucggccucgaauguuagga.....                                                                                     | 501   | 0   | seq    |

## Star

## Mature

aguagauaaccuguuagauggcggaagaaaauuucaacauuagaggccaaaauagaauucagauucuuuuucggccucgaauguuaggagaauguuuuccucuaaccuaagca

|                                  |      |   |     |
|----------------------------------|------|---|-----|
| .....ucggccucgaaugGuaggA.....    | 2    | 1 | seq |
| .....ucggccucAaauguuaggA.....    | 1    | 1 | seq |
| .....ucggccucgaauguuaggAa.....   | 1    | 1 | seq |
| .....ucggccucgaGuguuaggA.....    | 2    | 1 | seq |
| .....ucAgccucgaauguuaggA.....    | 1    | 1 | seq |
| .....ucggccCcgaauuuaggA.....     | 5    | 1 | seq |
| .....uAggccucgaauguuaggA.....    | 1    | 1 | seq |
| .....ucggccucgaauguCaggA.....    | 2    | 1 | seq |
| .....CgggccucgaauguuaggA.....    | 1    | 1 | seq |
| .....NcggccucgaauguuaggA.....    | 1    | 1 | seq |
| .....ucggccucgaauguaggC.....     | 1    | 1 | seq |
| .....ucggccucgaauguaggag.....    | 381  | 0 | seq |
| .....Gcggccucgaauguaggag.....    | 2    | 1 | seq |
| .....ucggccucAaauguaggag.....    | 1    | 1 | seq |
| .....ucggccucgaauguaggAU.....    | 8    | 1 | seq |
| .....ucggccucgaaAUuaggag.....    | 1    | 1 | seq |
| .....ucggccucgaauguaggUg.....    | 1    | 1 | seq |
| .....ucUgccucgaauguaggag.....    | 1    | 1 | seq |
| .....ucggccuUgaauguaggag.....    | 1    | 1 | seq |
| .....ucggccucgaauguUggag.....    | 2    | 1 | seq |
| .....ucggccucgaauguaggGg.....    | 1    | 1 | seq |
| .....ucggccucgaGuguaggag.....    | 1    | 1 | seq |
| .....ucggccucgaauguaggAUa.....   | 16   | 1 | seq |
| .....ucggccucgaauguaggagA.....   | 172  | 0 | seq |
| .....ucggccucgaauguaggagG.....   | 3    | 1 | seq |
| .....ucggccucgaauguaggagC.....   | 1    | 1 | seq |
| .....ucggccucgaauguCaggagA.....  | 1    | 1 | seq |
| .....ucggccucgaauguuaAgagA.....  | 1    | 1 | seq |
| .....AcggccucgaauguaggagA.....   | 1    | 1 | seq |
| .....ucggccucgaauguaggAaCa.....  | 1    | 1 | seq |
| .....ucggccucgaauguaggUga.....   | 1    | 1 | seq |
| .....ucggccucgUauguuaggagaa..... | 1    | 1 | seq |
| .....ucggccucAaauguaggagaa.....  | 2    | 1 | seq |
| .....ucggccucgaauguaggAUaa.....  | 1    | 1 | seq |
| .....ucggcUucgaauguaggagaa.....  | 3    | 1 | seq |
| .....ucggccucgaauguaggUgaa.....  | 2    | 1 | seq |
| .....ucggccucgaauguUggagaa.....  | 4    | 1 | seq |
| .....ucggccAcgaauguaggagaa.....  | 1    | 1 | seq |
| .....ucggccucgaauguCaggagaa..... | 4    | 1 | seq |
| .....ucggccucgaaugCuaggagaa..... | 2    | 1 | seq |
| .....ucggccucgaCuguaggagaa.....  | 1    | 1 | seq |
| .....ucggccucgaauguaggagAU.....  | 23   | 1 | seq |
| .....ucggccCcgaauuuaggagaa.....  | 4    | 1 | seq |
| .....ucggccucgaauguaggGgaa.....  | 2    | 1 | seq |
| .....ucCggccucgaauguaggagaa..... | 1    | 1 | seq |
| .....Acggccucgaauguaggagaa.....  | 3    | 1 | seq |
| .....Ncgccucgaauguaggagaa.....   | 3    | 1 | seq |
| .....ucggccucgaauguaggagGa.....  | 12   | 1 | seq |
| .....ucggccucgaGuguaggagaa.....  | 6    | 1 | seq |
| .....ucAgccucgaauguaggagaa.....  | 1    | 1 | seq |
| .....ucggccucCauguaggagaa.....   | 1    | 1 | seq |
| .....ucggccucgaauguuaUgagaa..... | 1    | 1 | seq |
| .....ucggccucgaUuguaggagaa.....  | 1    | 1 | seq |
| .....ucggccucgaauguagAagaa.....  | 1    | 1 | seq |
| .....ucgAccucgaauguaggagaa.....  | 3    | 1 | seq |
| .....ucggccucgaaAUuaggagaa.....  | 1    | 1 | seq |
| .....ucggccucgaauguaggagaa.....  | 1884 | 0 | seq |
| .....ucggccucgCauguaggagaa.....  | 1    | 1 | seq |
| .....ucggccucgaauguaggagCa.....  | 1    | 1 | seq |
| .....ucggccucgaauguaggagAC.....  | 5    | 1 | seq |
| .....Cggccucgaauguaggagaa.....   | 6    | 1 | seq |
| .....ucggccucgaaugAUaggagaa..... | 2    | 1 | seq |
| .....ucggUucgaauguaggagaa.....   | 2    | 1 | seq |
| .....ucggccucgaaCguuaggagaa..... | 1    | 1 | seq |
| .....ucggccucgaauguUggagaa.....  | 1    | 1 | seq |
| .....ucggccucgaauguaggagaaU..... | 17   | 0 | seq |
| .....ucggccucgaaAUuaggagaaU..... | 1    | 1 | seq |
| .....ucggccucgaauguaggagACu..... | 3    | 1 | seq |
| .....ucggccucgaauguaggagAAC..... | 11   | 1 | seq |
| .....ucggccucgaauguaggagaaG..... | 1    | 1 | seq |

# Star

# Mature

|                                                                                                                                            |    |   |     |
|--------------------------------------------------------------------------------------------------------------------------------------------|----|---|-----|
| aguagauaaccuguuagauggcggaagaaauu <u>cuuca</u> cauuagaggcca <u>aaau</u> agaucagauu <u>cuuuuu</u> ucggccucgaauguuaggagaauguuuuccucuaccuaagca |    |   |     |
| .....ucggccucgaauguuaggagaUu.....                                                                                                          | 16 | 1 | seq |
| .....ucggccucgaauguuaggagaaCg.....                                                                                                         | 2  | 1 | seq |
| .....ucggccucgaauguuaggagaaGg.....                                                                                                         | 1  | 1 | seq |
| .....ucggccucgaauguuaggagaUug.....                                                                                                         | 1  | 1 | seq |
| .....ucggccucgaauguuaggaaAaug.....                                                                                                         | 1  | 1 | seq |
| .....cggccucgaauguuagg.....                                                                                                                | 2  | 0 | seq |
| .....cggccucgaauguuaggga.....                                                                                                              | 8  | 0 | seq |
| .....cggccucgaauguuaggag.....                                                                                                              | 8  | 0 | seq |
| .....Nggccucgaauguuaggaga.....                                                                                                             | 1  | 1 | seq |
| .....cggccucgaauguuaggaga.....                                                                                                             | 6  | 0 | seq |
| .....cggccucgaauguuaggagaaC.....                                                                                                           | 1  | 1 | seq |
| .....ccucgaauguuaggaga.....                                                                                                                | 1  | 0 | seq |
| .....uguuuuccucuGccuaagc.....                                                                                                              | 1  | 1 | seq |

Provisional ID : MA\_422865\_25568  
Score total : 0.3  
Score for star read(s) : -1.3  
Score for read counts : 0  
Score for mfe : 0  
Score for randfold : 1.6  
Score for cons. seed :  
Total read count : 792  
Mature read count : 792  
Loop read count : 0  
Star read count : 0

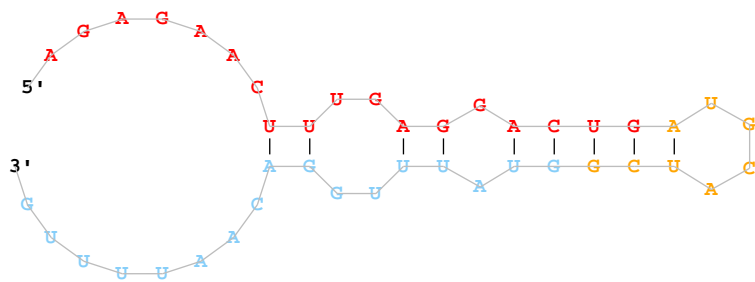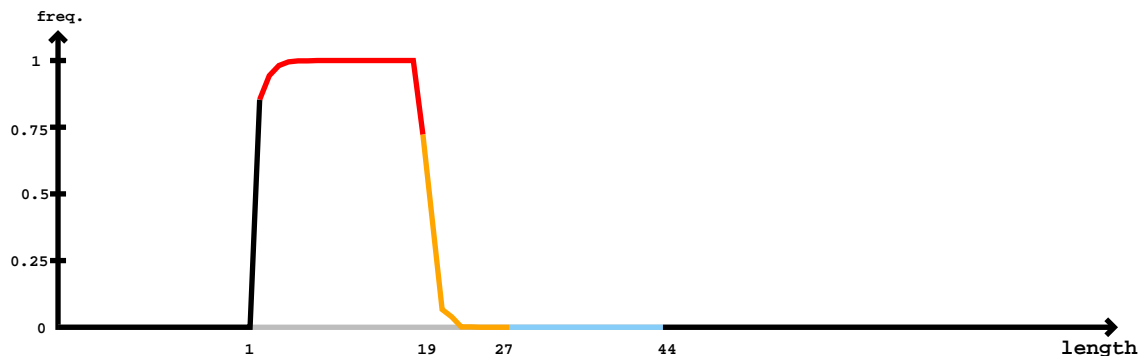

## Mature Star

| 5'                                                                                 |                                                                                         | -3'   | exp |        |  |
|------------------------------------------------------------------------------------|-----------------------------------------------------------------------------------------|-------|-----|--------|--|
| ggaauaacaacaugucucu                                                                | agagaacuuugaggacugaugcaucgguauuuggacaaauuugaggcaacaaggagggauggaacaaauuguugcaaccauccuugc |       |     |        |  |
| .....(((((((.....((.....)))))).)).....)))).....(((((((.....)))))).)).....))))..... |                                                                                         | reads | mm  | sample |  |
| .....Ggagaacuuugaggacug.....                                                       |                                                                                         | 1     | 1   | seq    |  |
| .....Ugagaacuuugaggacug.....                                                       |                                                                                         | 219   | 1   | seq    |  |
| .....Ugagaacuuugaggacug.....                                                       |                                                                                         | 293   | 1   | seq    |  |
| .....agagaacuuugaggacug.....                                                       |                                                                                         | 1     | 0   | seq    |  |
| .....agagaacuuugaAgacug.....                                                       |                                                                                         | 98    | 1   | seq    |  |
| .....Ugagaacuuugaggacuga.....                                                      |                                                                                         | 50    | 1   | seq    |  |
| .....agagaacuuugaAgacuga.....                                                      |                                                                                         | 14    | 1   | seq    |  |
| .....gagaacuuugaggacug.....                                                        |                                                                                         | 35    | 0   | seq    |  |
| .....gagaacuuugaCgacug.....                                                        |                                                                                         | 2     | 1   | seq    |  |
| .....gagaacuuugaggacuU.....                                                        |                                                                                         | 1     | 1   | seq    |  |
| .....gagaacuuugUggacug.....                                                        |                                                                                         | 1     | 1   | seq    |  |
| .....gagaacuuugaggacCg.....                                                        |                                                                                         | 2     | 1   | seq    |  |
| .....gagaacuuCgaggacug.....                                                        |                                                                                         | 1     | 1   | seq    |  |
| .....gagaacuuugaggacuaA.....                                                       |                                                                                         | 3     | 1   | seq    |  |
| .....gagaacuuugaUgacuga.....                                                       |                                                                                         | 3     | 1   | seq    |  |
| .....gagaacuuugaCgacuga.....                                                       |                                                                                         | 2     | 1   | seq    |  |
| .....gagaacuuugaggacuga.....                                                       |                                                                                         | 6     | 0   | seq    |  |
| .....gagaacuuugaAgacugau.....                                                      |                                                                                         | 4     | 1   | seq    |  |
| .....gagaacuuugaggacugaA.....                                                      |                                                                                         | 6     | 1   | seq    |  |
| .....gagaacuuugaggacugaAg.....                                                     |                                                                                         | 5     | 1   | seq    |  |
| .....agaacuuugaggacuga.....                                                        |                                                                                         | 5     | 0   | seq    |  |
| .....agaacuuugaUgacuga.....                                                        |                                                                                         | 1     | 1   | seq    |  |
| .....agaacuuugaggacugG.....                                                        |                                                                                         | 1     | 1   | seq    |  |
| .....agaacuuugaAgacugau.....                                                       |                                                                                         | 3     | 1   | seq    |  |
| .....agaacuuugaggacugaA.....                                                       |                                                                                         | 4     | 1   | seq    |  |
| .....agaacuuugaggacugaAg.....                                                      |                                                                                         | 14    | 1   | seq    |  |
| .....agaacuuugaAgacugaug.....                                                      |                                                                                         | 2     | 1   | seq    |  |
| .....gaacuuugaAgacugau.....                                                        |                                                                                         | 2     | 1   | seq    |  |
| .....gaacuuugaggacugaA.....                                                        |                                                                                         | 3     | 1   | seq    |  |
| .....gaacuuugaggacugaAg.....                                                       |                                                                                         | 6     | 1   | seq    |  |
| .....aacuuugaggacugaug.....                                                        |                                                                                         | 1     | 0   | seq    |  |
| .....aacuuugaAgacugaug.....                                                        |                                                                                         | 2     | 1   | seq    |  |
| .....cuuugaAgacugaugca.....                                                        |                                                                                         | 1     | 1   | seq    |  |

Provisional ID : MA\_42343\_4994  
Score total : 0  
Score for star read(s) : -1.3  
Score for read counts : 0  
Score for mfe : -0.2  
Score for randfold : 1.6  
Score for cons. seed :  
Total read count : 38  
Mature read count : 38  
Loop read count : 0  
Star read count : 0

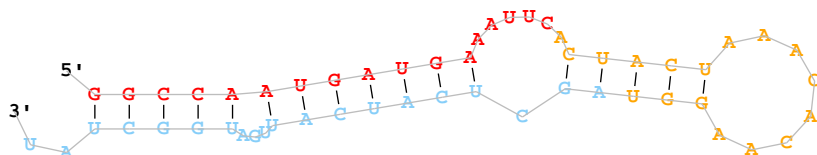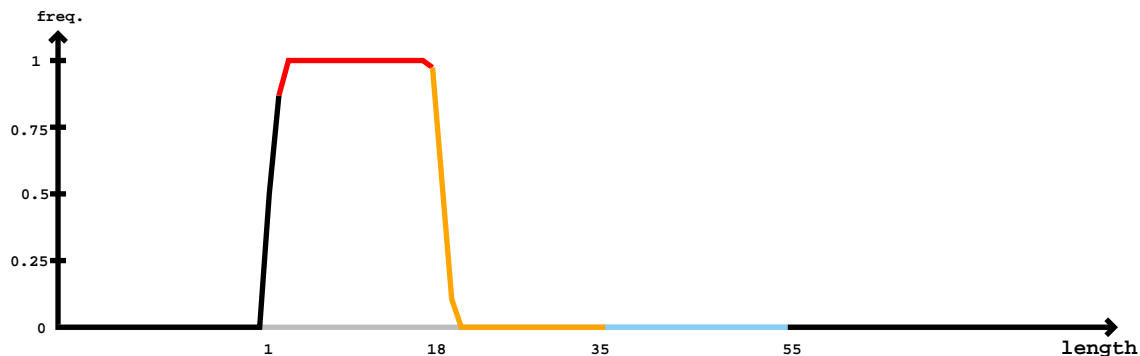

Mature

Star

| 5' - | g g g a g a a c c a u a u a g u u a g u g g c c a a u g a u g a a a u u c a c u a c u a a a c a a g g u a g c u c a u c a u u g a u g g c u a u a a g u a c c a a g g u a u a a g u a c a a u u c u c u u a g u g | -3'   | exp |        |  |
|------|-------------------------------------------------------------------------------------------------------------------------------------------------------------------------------------------------------------------|-------|-----|--------|--|
|      | ((((((((.....((((((((((((.....((((.....)))))).)))))).)))))).)))))).)))))).)))))).)))))).)))))).)))))).....                                                                                                        | reads | mm  | sample |  |
|      | .....uggccaaugauga.....                                                                                                                                                                                           | 1     | 0   | seq    |  |
|      | .....uggccaaugauga.....U.....                                                                                                                                                                                     | 1     | 1   | seq    |  |
|      | .....uggccaaCgaugaaauc.....                                                                                                                                                                                       | 1     | 1   | seq    |  |
|      | .....uggccaaugauga.....                                                                                                                                                                                           | 6     | 0   | seq    |  |
|      | .....uggccaaugauga.....G.....                                                                                                                                                                                     | 1     | 1   | seq    |  |
|      | .....uggccaaugauga.....C.....                                                                                                                                                                                     | 6     | 1   | seq    |  |
|      | .....uggccaaugauga.....Uc.....                                                                                                                                                                                    | 3     | 1   | seq    |  |
|      | .....ggccaaugauga.....                                                                                                                                                                                            | 9     | 0   | seq    |  |
|      | .....ggccaaugauga.....uca.....                                                                                                                                                                                    | 1     | 0   | seq    |  |
|      | .....ggccaaugauga.....C.....                                                                                                                                                                                      | 3     | 1   | seq    |  |
|      | .....ggccaaugauga.....Uc.....                                                                                                                                                                                     | 1     | 1   | seq    |  |
|      | .....gccaaugauga.....C.....                                                                                                                                                                                       | 4     | 1   | seq    |  |
|      | .....gccaaugauga.....                                                                                                                                                                                             | 1     | 0   | seq    |  |

Provisional ID : MA\_42375\_3021  
Score total : 1.1  
Score for star read(s) : -1.3  
Score for read counts : 0  
Score for mfe : 0.8  
Score for randfold : 1.6  
Score for cons. seed :  
Total read count : 276  
Mature read count : 276  
Loop read count : 0  
Star read count : 0

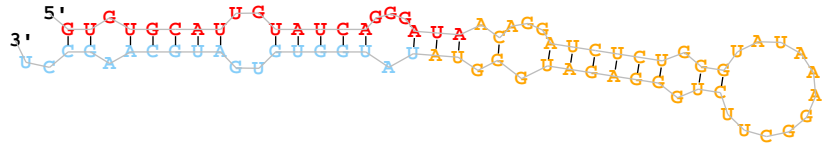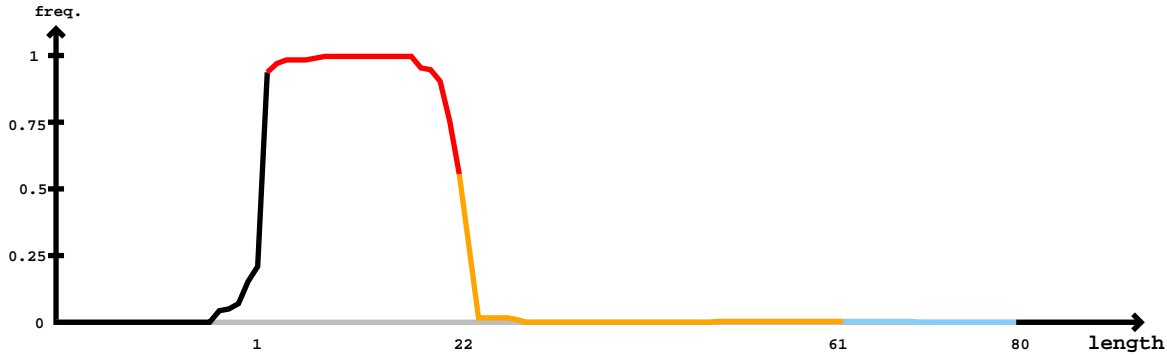

### Mature

### Star

| 5' -                                                                               |                     | -3'                                                    | exp   |    |
|------------------------------------------------------------------------------------|---------------------|--------------------------------------------------------|-------|----|
| cagugcuaguuaggagaua                                                                | gugugcauuguaucaggga | uaaaggcuucugggagagugguauauggugugaugcaagccuacuuuagcuuuu | reads | mm |
| .....(((((((.....(((((((.....(((((((.....(((((((.....)))))))).)))))))).))))))..... |                     |                                                        | 11    | 1  |
| .....aAauagugugcauuguaucag.....                                                    |                     |                                                        | 2     | 1  |
| .....agCuagugugcauuguaucag.....                                                    |                     |                                                        | 2     | 1  |
| .....Aauagugugcauuguaucagg.....                                                    |                     |                                                        | 1     | 1  |
| .....auagugugcauugugucaggg.....                                                    |                     |                                                        | 4     | 0  |
| .....auagugugcauuguaucaggg.....                                                    |                     |                                                        | 1     | 1  |
| .....auagugugcauuguaucagggC.....                                                   |                     |                                                        | 1     | 0  |
| .....uagugugcauuguaucaggg.....                                                     |                     |                                                        | 1     | 1  |
| .....uGgugugcauuguaucagggga.....                                                   |                     |                                                        | 1     | 1  |
| .....uaguguAcauuguaucagggga.....                                                   |                     |                                                        | 21    | 0  |
| .....uagugugcauuguaucagggga.....                                                   |                     |                                                        | 1     | 1  |
| .....agugugcauuguaucaggg.....                                                      |                     |                                                        | 2     | 0  |
| .....agugugcauuguaucaggggaA.....                                                   |                     |                                                        | 1     | 1  |
| .....agugugcauuguaucaggggaC.....                                                   |                     |                                                        | 2     | 1  |
| .....aguguAcauuguaucagggga.....                                                    |                     |                                                        | 2     | 1  |
| .....Ngugugcauuguaucagggga.....                                                    |                     |                                                        | 1     | 1  |
| .....agugugcauuguaucagggga.....                                                    |                     |                                                        | 9     | 0  |
| .....gugugcauuguaucaggg.....                                                       |                     |                                                        | 2     | 0  |
| .....gugugUauuguaucaggg.....                                                       |                     |                                                        | 1     | 1  |
| .....gugugcauuguaucagggA.....                                                      |                     |                                                        | 1     | 1  |
| .....gugugcauuguaucagggga.....                                                     |                     |                                                        | 13    | 0  |
| .....gugugcauuguaucagggG.....                                                      |                     |                                                        | 2     | 1  |
| .....gugugcauuguaucGggga.....                                                      |                     |                                                        | 1     | 1  |
| .....gugugcauuguaucaggggaG.....                                                    |                     |                                                        | 3     | 1  |
| .....gugugcauugugucagggga.....                                                     |                     |                                                        | 1     | 1  |
| .....gugugcauuguaucaggggaC.....                                                    |                     |                                                        | 3     | 1  |
| .....gugugcauuguaucagggga.....                                                     |                     |                                                        | 35    | 0  |
| .....gugugcauuguaucGggga.....                                                      |                     |                                                        | 1     | 1  |
| .....gugugcauuguaucaggggaCa.....                                                   |                     |                                                        | 2     | 1  |
| .....gGgugcauuguaucagggga.....                                                     |                     |                                                        | 1     | 1  |
| .....gugugcauuguaucagggGua.....                                                    |                     |                                                        | 1     | 1  |
| .....guAugcauuguaucagggga.....                                                     |                     |                                                        | 1     | 1  |
| .....gCgugcauuguaucagggga.....                                                     |                     |                                                        | 1     | 1  |
| .....gugugcauuaucagggga.....                                                       |                     |                                                        | 1     | 1  |

## Mature

## Star

|                      |                                 |                                                                  |              |     |   |     |
|----------------------|---------------------------------|------------------------------------------------------------------|--------------|-----|---|-----|
| cagugcuaguuuaggagaua | gugugcauuguaucaggga             | aaacagggaucucuggguauaaaggcuucuggggagauaggguauaugggugugaugcaagccu | acuuuagcuuuu |     |   |     |
| .....                | .gugugcauuguaucagggaG.....      |                                                                  |              | 1   | 1 | seq |
| .....                | .gugugcauuguaucagggaG.....      |                                                                  |              | 146 | 0 | seq |
| .....                | .gugugcauuguaucUggga.....       |                                                                  |              | 1   | 1 | seq |
| .....                | .gugugcauuguaucagggaGcagga..... |                                                                  |              | 1   | 1 | seq |
| .....                | .ugugcauGguaucaggg.....         |                                                                  |              | 1   | 1 | seq |
| .....                | .ugugcauuguaucaggga.....        |                                                                  |              | 1   | 0 | seq |
| .....                | .ugugcauuguaucaggga.....        |                                                                  |              | 2   | 0 | seq |
| .....                | .ugugcauuguaucaggga.....        |                                                                  |              | 1   | 0 | seq |
| .....                | .ugugcauuguaucagggaG.....       |                                                                  |              | 3   | 1 | seq |
| .....                | .ugugcauuguaucagggaGaa.....     |                                                                  |              | 2   | 0 | seq |
| .....                | .gugcauuguaucaggga.....         |                                                                  |              | 3   | 0 | seq |
| .....                | .gugcauuguaucaggga.....         |                                                                  |              | 1   | 0 | seq |
| .....                | .cauuguaucagggaGcagg.....       |                                                                  |              | 2   | 1 | seq |
| .....                | .auuguaucagggaGcagga.....       |                                                                  |              | 2   | 1 | seq |
| .....                | .....                           | uggAagauggguauaugggu.....                                        |              | 1   | 1 | seq |





## Mature

## Star

|                 |                               |                   |                       |                                         |      |   |     |
|-----------------|-------------------------------|-------------------|-----------------------|-----------------------------------------|------|---|-----|
| uggaucuguaacuuu | gggaaaaaggaauuggcucu          | aaggguuugggccuagg | ggucugcauccucaaccccau | ggguuaucaacagucugcccaugggacugucauugauua |      |   |     |
| .....           | uugggaaaaaggaauuggcucu        | .....             |                       |                                         | 2    | 0 | seq |
| .....           | uugggaaaaaggaauuggcucuGaggggu | .....             |                       |                                         | 1    | 1 | seq |
| .....           | .Ngggaaaaaggaauuggcucu        | .....             |                       |                                         | 3    | 1 | seq |
| .....           | Ggggaaaaaggaauuggcucu         | .....             |                       |                                         | 2    | 1 | seq |
| .....           | uugggaaaaaggaauuggcucu        | .....             |                       |                                         | 5    | 0 | seq |
| .....           | .Ngggaaaaaggaauuggcucu        | .....             |                       |                                         | 3    | 1 | seq |
| .....           | Ggggaaaaaggaauuggcucu         | .....             |                       |                                         | 2    | 1 | seq |
| .....           | uugggGaaaggaauuggcucu         | .....             |                       |                                         | 1    | 1 | seq |
| .....           | .Ngggaaaaaggaauuggcucu        | .....             |                       |                                         | 5    | 1 | seq |
| .....           | uugggaaaaaggaauuggcucu        | .....             |                       |                                         | 5    | 0 | seq |
| .....           | Ggggaaaaaggaauuggcucu         | .....             |                       |                                         | 3    | 1 | seq |
| .....           | uugggaaaaaggaauuggcucua       | .....             |                       |                                         | 1    | 0 | seq |
| .....           | .gggaaaaaggauCgggcucu         | .....             |                       |                                         | 3    | 1 | seq |
| .....           | .gggaaaaaggauuAgcucu          | .....             |                       |                                         | 2    | 1 | seq |
| .....           | .gggaaaaagGAauuggcucu         | .....             |                       |                                         | 1    | 1 | seq |
| .....           | .gggaGaaggaauuggcucu          | .....             |                       |                                         | 3    | 1 | seq |
| .....           | .gggaaaaaggauAgggcucu         | .....             |                       |                                         | 1    | 1 | seq |
| .....           | .gggaaaGggauuggcucu           | .....             |                       |                                         | 7    | 1 | seq |
| .....           | .gggaaaaggUauuggcucu          | .....             |                       |                                         | 1    | 1 | seq |
| .....           | .gggaaaaaggaauuggcug          | .....             |                       |                                         | 3    | 1 | seq |
| .....           | .gggaaaaaggaCuggcucu          | .....             |                       |                                         | 1    | 1 | seq |
| .....           | .gCgaaaaaggaauuggcucu         | .....             |                       |                                         | 1    | 1 | seq |
| .....           | .gggaaGaggaauuggcucu          | .....             |                       |                                         | 11   | 1 | seq |
| .....           | .gggaaaaaggaGuggcucu          | .....             |                       |                                         | 1    | 1 | seq |
| .....           | .gggaaaaaggaauuggAuc          | .....             |                       |                                         | 2    | 1 | seq |
| .....           | .gggaaaaaggaauuggcucu         | .....             |                       |                                         | 1485 | 0 | seq |
| .....           | .gggGaaaggaauuggcucu          | .....             |                       |                                         | 4    | 1 | seq |
| .....           | .gggaaaaaggaauuggcGc          | .....             |                       |                                         | 1    | 1 | seq |
| .....           | .Cggaaaaaggaauuggcucu         | .....             |                       |                                         | 1    | 1 | seq |
| .....           | .gggaaaaaggaauuggcua          | .....             |                       |                                         | 33   | 1 | seq |
| .....           | .gggaaaaaggaauuggGuc          | .....             |                       |                                         | 1    | 1 | seq |
| .....           | .gggaaaaaggaauugCcucu         | .....             |                       |                                         | 2    | 1 | seq |
| .....           | .gggaaaaaggaauuggUuc          | .....             |                       |                                         | 2    | 1 | seq |
| .....           | .gggaaaaaggaauuggcAc          | .....             |                       |                                         | 3    | 1 | seq |
| .....           | .gggaaaaaggauAgggcucu         | .....             |                       |                                         | 2    | 1 | seq |
| .....           | .gggaaaaaggaauuggcucuG        | .....             |                       |                                         | 56   | 1 | seq |
| .....           | .gUgaaaaaggaauuggcucu         | .....             |                       |                                         | 1    | 1 | seq |
| .....           | .gggaaaaaggaauuAgcucu         | .....             |                       |                                         | 1    | 1 | seq |
| .....           | .gggaaaaaggaauuggcua          | .....             |                       |                                         | 53   | 1 | seq |
| .....           | .gggaaaaaggaCuggcucu          | .....             |                       |                                         | 5    | 1 | seq |
| .....           | .gggaaaagCauuggcucu           | .....             |                       |                                         | 1    | 1 | seq |
| .....           | .Nggaaaaaggaauuggcucu         | .....             |                       |                                         | 1    | 1 | seq |
| .....           | .gggaaaaaggaUGgggcucu         | .....             |                       |                                         | 2    | 1 | seq |
| .....           | .gggaaaaaggaauuggcAcu         | .....             |                       |                                         | 1    | 1 | seq |
| .....           | .gggaaaaaggauCgggcucu         | .....             |                       |                                         | 5    | 1 | seq |
| .....           | .gggaaaaaggaauuggcucu         | .....             |                       |                                         | 1493 | 0 | seq |
| .....           | .gggCaaaggaauuggcucu          | .....             |                       |                                         | 1    | 1 | seq |
| .....           | .gggaGaaggaauuggcucu          | .....             |                       |                                         | 3    | 1 | seq |
| .....           | .gggaaaaaggaauuggcugu         | .....             |                       |                                         | 1    | 1 | seq |
| .....           | .gggaaaGggaauuggcucu          | .....             |                       |                                         | 7    | 1 | seq |
| .....           | .gggaaGaggaauuggcucu          | .....             |                       |                                         | 4    | 1 | seq |
| .....           | .gggGaaaggaauuggcucu          | .....             |                       |                                         | 1    | 1 | seq |
| .....           | .gggaaaaaggaauuggcGcu         | .....             |                       |                                         | 1    | 1 | seq |
| .....           | .gCgaaaaaggaauuggcucu         | .....             |                       |                                         | 1    | 1 | seq |
| .....           | .gggaUaaggaauuggcucu          | .....             |                       |                                         | 1    | 1 | seq |
| .....           | .gggaaaaaggaauuggUuc          | .....             |                       |                                         | 1    | 1 | seq |
| .....           | .gggaaaaaggaauuggcucua        | .....             |                       |                                         | 67   | 0 | seq |
| .....           | .Aggaaaaaggaauuggcucua        | .....             |                       |                                         | 1    | 1 | seq |
| .....           | .gggaaaaaggGuuggcucua         | .....             |                       |                                         | 1    | 1 | seq |
| .....           | .gggaaaaaggaauuggcucCa        | .....             |                       |                                         | 2    | 1 | seq |
| .....           | .gggaaaaaggaauuggcucuaa       | .....             |                       |                                         | 1    | 0 | seq |
| .....           | .gggaaaaaggaauuggcucuaagg     | .....             |                       |                                         | 1    | 0 | seq |
| .....           | .ggaaaGggaauuggcucu           | .....             |                       |                                         | 9    | 1 | seq |
| .....           | .ggaaaaggaauuggcucA           | .....             |                       |                                         | 43   | 1 | seq |
| .....           | .ggaaaaggaauuggcGcu           | .....             |                       |                                         | 1    | 1 | seq |
| .....           | .Ugaaaaggaauuggcucu           | .....             |                       |                                         | 3    | 1 | seq |
| .....           | .ggaaaaggaauuggcucG           | .....             |                       |                                         | 48   | 1 | seq |
| .....           | .ggaaaaggauAgggcucu           | .....             |                       |                                         | 2    | 1 | seq |
| .....           | .ggaaaaggaauuggcucu           | .....             |                       |                                         | 1273 | 0 | seq |
| .....           | .ggaaaaggaauAgcucu            | .....             |                       |                                         | 2    | 1 | seq |

## Mature

## Star

uggaucuguaacuuugggaaaaaggauuggcucu aaggguugggcccuaaggguucugcauccucaacccau ggguuaucacagucugcccaugggacugucauugauua

|                                     |    |   |     |
|-------------------------------------|----|---|-----|
| .....ggaaGaggauuggcucu.....         | 3  | 1 | seq |
| .....ggaaaaggauUgcucu.....          | 1  | 1 | seq |
| .....ggaaaaggauuggUucu.....         | 1  | 1 | seq |
| .....ggaaaaggauugCcucu.....         | 1  | 1 | seq |
| .....ggaaaaggauCggcucu.....         | 4  | 1 | seq |
| .....ggGaaaggauuggcucu.....         | 7  | 1 | seq |
| .....ggaGaaaggauuggcucu.....        | 4  | 1 | seq |
| .....ggaUaaggauuggcucu.....         | 1  | 1 | seq |
| .....ggaaaaggAuggcucu.....          | 1  | 1 | seq |
| .....gCaaaaggauuggcucu.....         | 1  | 1 | seq |
| .....Ngaaaaggauuggcucu.....         | 3  | 1 | seq |
| .....ggaaaaggauuggcuGu.....         | 1  | 1 | seq |
| .....ggaaaaggauuggcGcua.....        | 1  | 1 | seq |
| .....ggaaaaggGuuggcucua.....        | 1  | 1 | seq |
| .....ggGaaaggauuggcucua.....        | 1  | 1 | seq |
| .....ggaaaaggauuggcucua.....        | 47 | 0 | seq |
| .....ggaaaaggauuggcucuaa.....       | 1  | 0 | seq |
| .....ggaaaaggauuggcucuaagg.....     | 2  | 0 | seq |
| .....gaaaaggauuggcucua.....         | 73 | 0 | seq |
| .....gGaaaggauuggcucua.....         | 1  | 1 | seq |
| .....Aaaaaggauuggcucua.....         | 1  | 1 | seq |
| .....gaaaaggauuggcucCa.....         | 1  | 1 | seq |
| .....gaaaaggauuggcucuaagg.....      | 1  | 0 | seq |
| .....gaaaaggauuggcucuaaggg.....     | 1  | 0 | seq |
| .....aaaaggauuggcucuaagg.....       | 2  | 0 | seq |
| .....aaaaggauuggcucuaagC.....       | 1  | 1 | seq |
| .....aaaggauuggcucuaag.....         | 1  | 0 | seq |
| .....aaaggauuggcucuaagg.....        | 1  | 0 | seq |
| .....aaGggauuggcucuaaggg.....       | 1  | 1 | seq |
| .....aaaggauuggcucuaaggg.....       | 3  | 0 | seq |
| .....aaggauuggcucuaagg.....         | 12 | 0 | seq |
| .....aaggauuggcucuaagU.....         | 1  | 1 | seq |
| .....aaggauuggcucuaaggg.....        | 8  | 0 | seq |
| .....aggauuggcucuaaggg.....         | 9  | 0 | seq |
| .....aggauuggcucuaagUg.....         | 1  | 1 | seq |
| .....aggauuggcucuaagggU.....        | 1  | 0 | seq |
| .....agggauugggcccuaaggAg.....      | 1  | 1 | seq |
| .....agggauugggcccuaaggg.....       | 2  | 0 | seq |
| .....agggGugggcccuaaggg.....        | 2  | 1 | seq |
| .....agggauugggcccuaagggG.....      | 1  | 1 | seq |
| .....agggGugggcccuaaggggu.....      | 1  | 1 | seq |
| .....agggauugggcccuaaggggu.....     | 2  | 0 | seq |
| .....agggauugggcccuaagggguc.....    | 3  | 0 | seq |
| .....agggauugggcccuaaggggucC.....   | 1  | 1 | seq |
| .....agggauugggcccuaagggguc.....    | 4  | 0 | seq |
| .....ggguugggcccuaaggggu.....       | 2  | 0 | seq |
| .....gggGugggcccuaaggggu.....       | 1  | 1 | seq |
| .....ggguugggcccuaagggguc.....      | 1  | 0 | seq |
| .....ggguugggcccuaagggguc.....      | 1  | 0 | seq |
| .....ggguugggcccuaaggggucug.....    | 4  | 0 | seq |
| .....ggguugggcccuaagggguc.....      | 1  | 1 | seq |
| .....ggguugggcccuaagggguc.....      | 1  | 0 | seq |
| .....ggGugggcccuaaggggucug.....     | 1  | 1 | seq |
| .....ggguugggcccuaaggggucug.....    | 7  | 0 | seq |
| .....ggguugggcccuaaggggucugc.....   | 2  | 0 | seq |
| .....Cuugggcccuaagggguc.....        | 1  | 1 | seq |
| .....guugggcccuaaggggucug.....      | 1  | 0 | seq |
| .....Nugggcccuaaggggucug.....       | 1  | 1 | seq |
| .....uugggcccuaaggggucug.....       | 1  | 0 | seq |
| .....ugggcccuaaggggucugc.....       | 6  | 0 | seq |
| .....ugggcccuaaggggucugca.....      | 1  | 0 | seq |
| .....ugggcccuaaggggucugcCuccu.....  | 1  | 1 | seq |
| .....ugggcccuaaggggucugcauccCc..... | 1  | 1 | seq |
| .....ugggcccuaaggggucugcaCccuc..... | 1  | 1 | seq |
| .....gggcccuaaggggucugca.....       | 2  | 0 | seq |
| .....gccuaggggucugcaGcc.....        | 1  | 1 | seq |
| .....gccuaggggucugcCucc.....        | 13 | 1 | seq |
| .....gccuaggggucugcaucc.....        | 6  | 0 | seq |
| .....gccuaggggucugcaCcc.....        | 1  | 1 | seq |
| .....gccuaggggucugcaCccu.....       | 1  | 1 | seq |

Mature

Star

|                 |                       |                  |                    |                                         |   |   |     |
|-----------------|-----------------------|------------------|--------------------|-----------------------------------------|---|---|-----|
| uggaucuguaacuuu | gggaaaaggauuggcucu    | aaggguugggccuagg | ggucugcaucccaaccca | uggguaucaacagucugcccaugggacugucauugauua |   |   |     |
| .....           | gccuaggggucugcauccC   | .....            |                    |                                         | 5 | 1 | seq |
| .....           | gccuaggggucugcaCccuc  | .....            |                    |                                         | 3 | 1 | seq |
| .....           | gccuaggggucugcauccCca | .....            |                    |                                         | 1 | 1 | seq |
| .....           | ccuaggggucugcaCcc     | .....            |                    |                                         | 1 | 1 | seq |
| .....           | ccuaggggucugcCucc     | .....            |                    |                                         | 6 | 1 | seq |
| .....           | ccuaggggucugcauccC    | .....            |                    |                                         | 2 | 1 | seq |
| .....           | ccuaggggucugcaCccuc   | .....            |                    |                                         | 1 | 1 | seq |
| .....           | cuaggggucugcaCccuc    | .....            |                    |                                         | 3 | 1 | seq |
| .....           | cuaggggucugcauccCc    | .....            |                    |                                         | 1 | 1 | seq |

Provisional ID : MA\_42952\_13514  
Score total : 175  
Score for star read(s) : 3.9  
Score for read counts : 167.9  
Score for mfe : 1.7  
Score for randfold : 1.6  
Score for cons. seed :  
Total read count : 341  
Mature read count : 313  
Loop read count : 0  
Star read count : 28

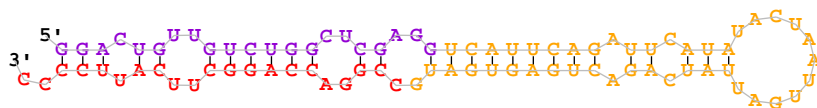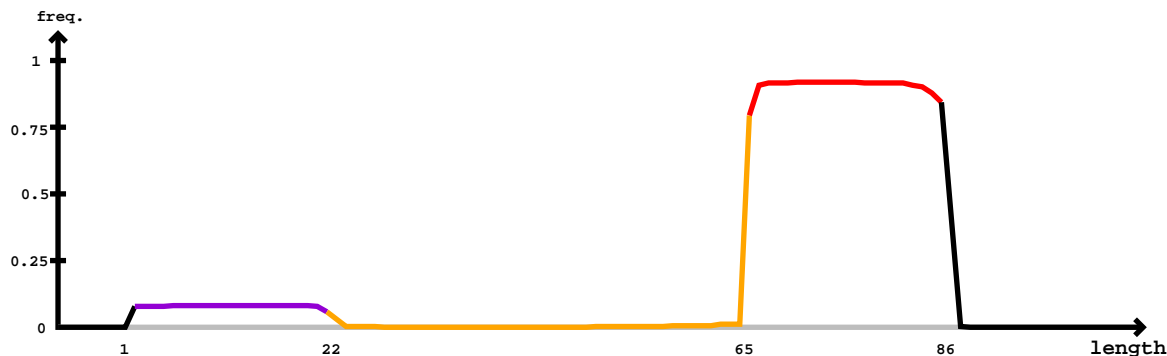

### Star

### Mature

| 5' -                                                                                                              | 3' | obs | exp | reads | mm | sample |
|-------------------------------------------------------------------------------------------------------------------|----|-----|-----|-------|----|--------|
| uuguggggacuguuugucuggcucgaggucauucagauucauauacuaauugauuauucagacugagugaugccggaccagggucauuccccuacacuccaaacaaaaaua   |    |     |     |       |    |        |
| uuguggggacuguuugucuggcucgaggucauucagauucauauacuaauugauuauucagacugagugaugccggaccagggucauuccccuacacuccaaacaaaaaua   |    |     |     |       |    |        |
| ((((((((((((((((((((((((((((((((((((((((((((((((((((((((((((((((((((((((((((((((((((((((((((((((((((((((((((((((( |    |     |     |       |    |        |
| .....ggacuguuugucuggcucga.....                                                                                    |    |     |     | 1     | 0  | seq    |
| .....ggacuguuugucuggcucgag.....                                                                                   |    |     |     | 7     | 0  | seq    |
| .....ggaGuguugucuggcucgagg.....                                                                                   |    |     |     | 4     | 1  | seq    |
| .....ggacuguuugucuggcucgagg.....                                                                                  |    |     |     | 15    | 0  | seq    |
| .....uguugucuggcucgaggucauu.....                                                                                  |    |     |     | 1     | 0  | seq    |
| .....auGagacugagugaugccggaccagggucauuccc.....                                                                     |    |     |     | 1     | 1  | seq    |
| .....gagugaugccggaccagggu.....                                                                                    |    |     |     | 1     | 0  | seq    |
| .....augccggaccagggucauucccU.....                                                                                 |    |     |     | 1     | 1  | seq    |
| .....augccggaccagggucauucccc.....                                                                                 |    |     |     | 1     | 0  | seq    |
| .....ccggaccagggucauu.....                                                                                        |    |     |     | 3     | 0  | seq    |
| .....ccggaccagggucauuc.....                                                                                       |    |     |     | 1     | 0  | seq    |
| .....ccggaccagggucauucU.....                                                                                      |    |     |     | 1     | 1  | seq    |
| .....ccggaccagggucauuccc.....                                                                                     |    |     |     | 4     | 0  | seq    |
| .....ccggaccagggucauuccG.....                                                                                     |    |     |     | 1     | 1  | seq    |
| .....Ncggaccagggucauuccc.....                                                                                     |    |     |     | 1     | 1  | seq    |
| .....ccggaccagggucauuccU.....                                                                                     |    |     |     | 1     | 1  | seq    |
| .....ccggacUagggucauucccc.....                                                                                    |    |     |     | 1     | 1  | seq    |
| .....ccggaccaggcAucauucccc.....                                                                                   |    |     |     | 1     | 1  | seq    |
| .....ccggaccagggucauCcccc.....                                                                                    |    |     |     | 3     | 1  | seq    |
| .....ccggaccagggucauCucccc.....                                                                                   |    |     |     | 1     | 1  | seq    |
| .....ccggaccagggucauucccc.....                                                                                    |    |     |     | 173   | 0  | seq    |
| .....ccggaccaggguUauucccc.....                                                                                    |    |     |     | 1     | 1  | seq    |
| .....Acggaccagggucauucccc.....                                                                                    |    |     |     | 7     | 1  | seq    |
| .....Gcggaccagggucauucccc.....                                                                                    |    |     |     | 12    | 1  | seq    |
| .....Ncggaccagggucauucccc.....                                                                                    |    |     |     | 7     | 1  | seq    |
| .....ccggaccagggucauucccU.....                                                                                    |    |     |     | 24    | 1  | seq    |
| .....ccggaccagggucauucccA.....                                                                                    |    |     |     | 9     | 1  | seq    |
| .....ccggaccagAcucauucccc.....                                                                                    |    |     |     | 1     | 1  | seq    |
| .....ccgAaccagggucauucccc.....                                                                                    |    |     |     | 1     | 1  | seq    |
| .....ccggaccagggucauuccccA.....                                                                                   |    |     |     | 5     | 1  | seq    |
| .....ccggaccagggucauuccccu.....                                                                                   |    |     |     | 6     | 0  | seq    |
| .....Acggaccagggucauuccccu.....                                                                                   |    |     |     | 1     | 1  | seq    |
| .....Ncggaccagggucauuccccu.....                                                                                   |    |     |     | 2     | 1  | seq    |

Star

Mature

|                                                                                                                               |    |   |     |
|-------------------------------------------------------------------------------------------------------------------------------|----|---|-----|
| uugugggggacugugucugggcucgagguc <u>auucagauucauauacuaauugauuau</u> cagacugagug <u>ugccggaccagggucauuccccu</u> caacuccaaacaaaaa |    |   |     |
| .....ccggGccagggucauuccccu.....                                                                                               | 1  | 1 | seq |
| .....ccggaccagggucauuccccG.....                                                                                               | 1  | 1 | seq |
| .....ccggaccagggucauuccccuG.....                                                                                              | 1  | 1 | seq |
| .....cggaccaggguuUauuc.....                                                                                                   | 1  | 1 | seq |
| .....Uggaccagggucauucc.....                                                                                                   | 1  | 1 | seq |
| .....cggaccagggucauucc.....                                                                                                   | 6  | 0 | seq |
| .....cggaccagggucauuccc.....                                                                                                  | 4  | 0 | seq |
| .....cggaccagggucauucccU.....                                                                                                 | 5  | 1 | seq |
| .....cggaccagggucauucccc.....                                                                                                 | 8  | 0 | seq |
| .....cggaccagggucauuccccAu.....                                                                                               | 1  | 1 | seq |
| .....cggaccagggucauuccccA.....                                                                                                | 3  | 1 | seq |
| .....cggaccagggucauuccccu.....                                                                                                | 10 | 0 | seq |
| .....ggaccagggucauucccc.....                                                                                                  | 3  | 0 | seq |
| .....ccagggucauuccccu.....                                                                                                    | 1  | 0 | seq |

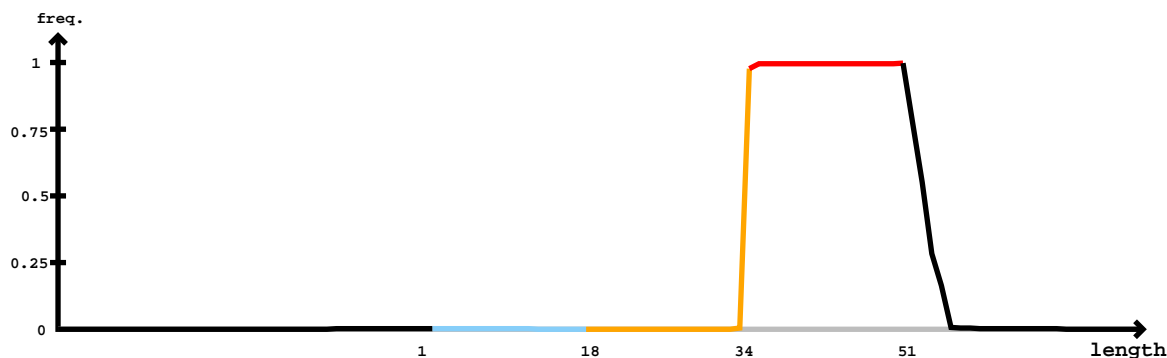

## Mature

[illegible]

## Star

## Mature

|                                                                                                                |   |   |     |
|----------------------------------------------------------------------------------------------------------------|---|---|-----|
| uuuuagcguggaugaaggagauucuugguugaggggaugcuauucggcucgaggucgcccuccuucgucgucggaccaggcucauuccucucuacuuggacuuccaagcc |   |   |     |
| .....ucggaccaggcucauuccA.....                                                                                  | 7 | 1 | seq |
| .....ucggaccaggcucauuccA.....                                                                                  | 1 | 1 | seq |
| .....ucggaccaggcucauuccU.....                                                                                  | 1 | 1 | seq |
| .....ucggaccaggcucauuccA.....                                                                                  | 1 | 1 | seq |
| .....ucggaccaggcucauuccCucuc.....                                                                              | 1 | 1 | seq |
| .....cggaccaggcuUauuc.....                                                                                     | 1 | 1 | seq |
| .....Uggaccaggcucauucc.....                                                                                    | 1 | 1 | seq |
| .....cggaccaggcucauucc.....                                                                                    | 6 | 0 | seq |
| .....uccucAcuacuuggacu.....                                                                                    | 1 | 1 | seq |



Provisional ID : MA\_429648\_35080  
 Score total : 1.2  
 Score for star read(s) : -1.3  
 Score for read counts : 0  
 Score for mfe : 0.9  
 Score for randfold : 1.6  
 Score for cons. seed :  
 Total read count : 28  
 Mature read count : 28  
 Loop read count : 0  
 Star read count : 0

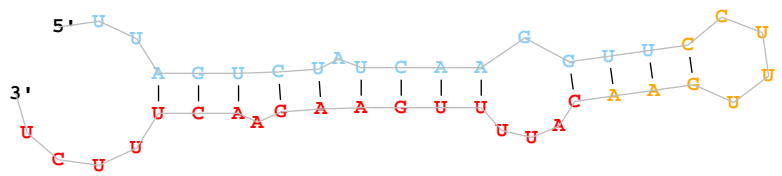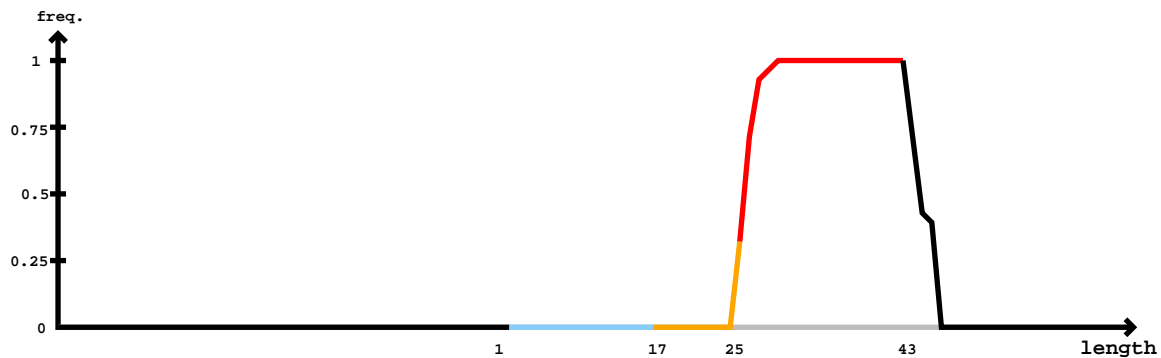

|                                                                                          |  | Star |  | Mature |  |                        |     |       |     |
|------------------------------------------------------------------------------------------|--|------|--|--------|--|------------------------|-----|-------|-----|
| 5'                                                                                       |  |      |  |        |  | -3'                    | exp |       |     |
| cccaguccgggagguccucgauauauaucauugauauuuuggggaguuuagucuaucaggguccuuugaacauuuugaagaacuuucu |  |      |  |        |  | uugcauuccuccgggauggucu |     | reads | mm  |
| .....Auuuugaagaacuuucu.....                                                              |  |      |  |        |  |                        |     | 4     | 1   |
| .....Auuuugaagaacuuucu.....                                                              |  |      |  |        |  |                        |     | 1     | 1   |
| .....Auuuugaagaacuuucu.....                                                              |  |      |  |        |  |                        |     | 1     | 1   |
| .....Auuuugaagaacuuucuug.....                                                            |  |      |  |        |  |                        |     | 3     | 1   |
| .....auuuugaagaacuuucC.....                                                              |  |      |  |        |  |                        |     | 2     | 1   |
| .....auuuugaagaacuuucu.....                                                              |  |      |  |        |  |                        |     | 3     | 0   |
| .....auuuugaagaacuuucu.....                                                              |  |      |  |        |  |                        |     | 2     | 0   |
| .....auuuugaagaacuuucuug.....                                                            |  |      |  |        |  |                        |     | 4     | 0   |
| .....uuuugaagaacuuucu.....                                                               |  |      |  |        |  |                        |     | 4     | 0   |
| .....uuuugaagaacuuucuug.....                                                             |  |      |  |        |  |                        |     | 2     | 0   |
| .....uuugaagaacuuucuug.....                                                              |  |      |  |        |  |                        |     | 1     | 0   |
| .....uugaagaacuuucuug.....                                                               |  |      |  |        |  |                        |     | 1     | 0   |
|                                                                                          |  |      |  |        |  |                        |     |       | seq |



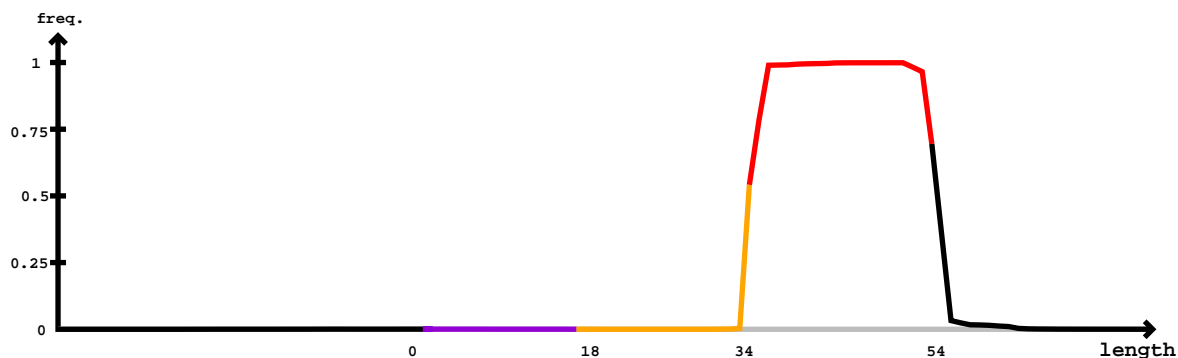

## Mature

|     |                                                                                                                                                                                                                                                                                                                                                   | -3'   | obs |        |
|-----|---------------------------------------------------------------------------------------------------------------------------------------------------------------------------------------------------------------------------------------------------------------------------------------------------------------------------------------------------|-------|-----|--------|
|     |                                                                                                                                                                                                                                                                                                                                                   |       | exp |        |
|     |                                                                                                                                                                                                                                                                                                                                                   | reads | mm  | sample |
| 5 - | caaucugggcgaaagacauuaucaagguggggaauuuuagcuggggguggcacaucaauuaaaagauaauguuugguguccuaagaugagcuaaugagaauagaaaauucuuugugug<br>caaucugggcgaaagacauuaucaagguggggaauuuuagcuggggguggcacaucaauuaaaagauaauguuugguguccuaagaugagcuaaugagaauagaaaauucuuugugug<br>..((((((.(...))...)))...(((((((((((.(.((((((((((.....))))))))))...))...))...))))...)))))).... |       |     |        |
|     | .....ggcggGaagacauuaucaagggu.....                                                                                                                                                                                                                                                                                                                 | 1     | 1   | seq    |
|     | .....cgaaagacauuGucaggugug.....                                                                                                                                                                                                                                                                                                                   | 1     | 1   | seq    |
|     | .....aagacauuUucaggugug.....                                                                                                                                                                                                                                                                                                                      | 1     | 1   | seq    |
|     | .....aagGcauuaucaaggugggg.....                                                                                                                                                                                                                                                                                                                    | 1     | 1   | seq    |
|     | .....aagacauuGucaggugggggau.....                                                                                                                                                                                                                                                                                                                  | 1     | 1   | seq    |
|     | .....aagacauuGucagguggggaauu.....                                                                                                                                                                                                                                                                                                                 | 1     | 1   | seq    |
|     | .....gacauuGucaggugggggau.....                                                                                                                                                                                                                                                                                                                    | 1     | 1   | seq    |
|     | .....acauuaucaaggugggga.....                                                                                                                                                                                                                                                                                                                      | 1     | 0   | seq    |
|     | .....ucagguggggaauuuuGgcu.....                                                                                                                                                                                                                                                                                                                    | 1     | 1   | seq    |
|     | .....cagguggggaauuuuGgcu.....                                                                                                                                                                                                                                                                                                                     | 1     | 1   | seq    |
|     | .....cagguggggaGuuuagcu.....                                                                                                                                                                                                                                                                                                                      | 1     | 1   | seq    |
|     | .....cagguggggaauuuuGgcuggg.....                                                                                                                                                                                                                                                                                                                  | 1     | 1   | seq    |
|     | .....agguggggaGuuuagcug.....                                                                                                                                                                                                                                                                                                                      | 2     | 1   | seq    |
|     | .....gguggggaauuuuGgcug.....                                                                                                                                                                                                                                                                                                                      | 1     | 1   | seq    |
|     | .....guggggaGuuuagcuggg.....                                                                                                                                                                                                                                                                                                                      | 1     | 1   | seq    |
|     | .....guggggauuuuGgcugggg.....                                                                                                                                                                                                                                                                                                                     | 1     | 1   | seq    |
|     | .....ugggggaGuuuagcuggg.....                                                                                                                                                                                                                                                                                                                      | 3     | 1   | seq    |
|     | .....ugggggaGuuuagcugggg.....                                                                                                                                                                                                                                                                                                                     | 1     | 1   | seq    |
|     | .....gggggaGuuuagcugggg.....                                                                                                                                                                                                                                                                                                                      | 1     | 1   | seq    |
|     | .....gggggaauuuuGgcuggggg.....                                                                                                                                                                                                                                                                                                                    | 1     | 1   | seq    |
|     | .....uuuagcuggggCggcacau.....                                                                                                                                                                                                                                                                                                                     | 1     | 1   | seq    |
|     | .....uuuagcuggggCggcacau.....                                                                                                                                                                                                                                                                                                                     | 1     | 1   | seq    |
|     | .....uuagcuggggCggcacau.....                                                                                                                                                                                                                                                                                                                      | 1     | 1   | seq    |
|     | .....uuagcuggggCggcacau.....                                                                                                                                                                                                                                                                                                                      | 3     | 1   | seq    |
|     | .....uagcuggggCggcacau.....                                                                                                                                                                                                                                                                                                                       | 1     | 1   | seq    |
|     | .....uagcuggggCggcacau.....                                                                                                                                                                                                                                                                                                                       | 1     | 1   | seq    |
|     | .....gcuggggCggcacau.....                                                                                                                                                                                                                                                                                                                         | 6     | 1   | seq    |
|     | .....gCugguguccuaagaugagcu.....                                                                                                                                                                                                                                                                                                                   | 2     | 1   | seq    |
|     | .....gCugguguccuaagaugagcuc.....                                                                                                                                                                                                                                                                                                                  | 8     | 1   | seq    |
|     | .....gCugguguccuaagaugagcuc.....                                                                                                                                                                                                                                                                                                                  | 11    | 1   | seq    |
|     | .....Cugguguccuaagaugagc.....                                                                                                                                                                                                                                                                                                                     | 2     | 1   | seq    |
|     | .....Cugguguccuaagaugagcu.....                                                                                                                                                                                                                                                                                                                    | 2     | 1   | seq    |
|     | .....Cugguguccuaagaugagcuc.....                                                                                                                                                                                                                                                                                                                   | 3     | 1   | seq    |

## Star

## Mature

caaucugggcgaaagacauuauacagguggggauuuuagcuggggguggcacaucaauuuaaaagauaauguugguguccuaagagagcucuaugagaaauagaaauugugug

|                                         |     |   |     |
|-----------------------------------------|-----|---|-----|
| .....Cugguguccuaagagagcucua.....        | 9   | 1 | seq |
| .....Cugguguccuaagagagcucuaa.....       | 1   | 1 | seq |
| .....Ngguguccuaagagagc.....             | 4   | 1 | seq |
| .....Cgguguccuaagagagc.....             | 3   | 1 | seq |
| .....uCguguccuaagagagc.....             | 1   | 1 | seq |
| .....Ggguguccuaagagagc.....             | 3   | 1 | seq |
| .....Ggguguccuaagagagcuc.....           | 2   | 1 | seq |
| .....ugguguccuaagagagcuc.....           | 1   | 0 | seq |
| .....Cgguguccuaagagagcuc.....           | 1   | 1 | seq |
| .....Ggguguccuaagagagcuc.....           | 4   | 1 | seq |
| .....Ngguguccuaagagagcuc.....           | 4   | 1 | seq |
| .....Cgguguccuaagagagcuc.....           | 3   | 1 | seq |
| .....ugguguccuaagagagcucG.....          | 1   | 1 | seq |
| .....Ggguguccuaagagagcucua.....         | 9   | 1 | seq |
| .....Cgguguccuaagagagcucua.....         | 2   | 1 | seq |
| .....Ngguguccuaagagagcucua.....         | 5   | 1 | seq |
| .....ugguguccuaagagagcucua.....         | 1   | 0 | seq |
| .....Ngguguccuaagagagcucuaa.....        | 1   | 1 | seq |
| .....Ggguguccuaagagagcucuaa.....        | 3   | 1 | seq |
| .....Cgguguccuaagagagcucuaa.....        | 1   | 1 | seq |
| .....Agguguccuaagagagcucuaau.....       | 22  | 1 | seq |
| .....ugguguccuaagagagcucuaaCg.....      | 3   | 1 | seq |
| .....Agguguccuaagagagcucuaaug.....      | 12  | 1 | seq |
| .....Ggguguccuaagagagcucuaauga.....     | 1   | 1 | seq |
| .....ugguguccuaagagagcucuaaCga.....     | 1   | 1 | seq |
| .....ugguguccuaagagagcucuaaCgag.....    | 4   | 1 | seq |
| .....AgguguccuaagagagcucuaaAugag.....   | 3   | 1 | seq |
| .....ugguguccuaagagagcucuaaCgaga.....   | 7   | 1 | seq |
| .....AgguguccuaagagagcucuaaAugaga.....  | 8   | 1 | seq |
| .....AgguguccuaagagagcucuaaAugagaa..... | 1   | 1 | seq |
| .....gguguccuaagagagc.....              | 713 | 0 | seq |
| .....gguguccuGagagagc.....              | 2   | 1 | seq |
| .....ggugugCuaagagagc.....              | 1   | 1 | seq |
| .....ggugCccuaagagagc.....              | 2   | 1 | seq |
| .....gguguccuaagagagG.....              | 1   | 1 | seq |
| .....ggugugUcuaagagagc.....             | 2   | 1 | seq |
| .....gguguccuaGgagagc.....              | 2   | 1 | seq |
| .....ggCguccuaagagagc.....              | 2   | 1 | seq |
| .....ggugAccuaagagagc.....              | 1   | 1 | seq |
| .....gguguccuaagagGgc.....              | 4   | 1 | seq |
| .....gguguccuaagagugaAc.....            | 1   | 1 | seq |
| .....gguguccuaagaCgagc.....             | 3   | 1 | seq |
| .....gguguccuaagagUgc.....              | 1   | 1 | seq |
| .....gguguccCaagagagc.....              | 2   | 1 | seq |
| .....gguguccuaagagagcuc.....            | 343 | 0 | seq |
| .....gguguccUuaagagagcuc.....           | 1   | 1 | seq |
| .....gguguccuaagagUGgcuc.....           | 2   | 1 | seq |
| .....ggCguccuaagagagcuc.....            | 2   | 1 | seq |
| .....gguguccuaagagagcG.....             | 21  | 1 | seq |
| .....gguguccuaagagugaCcu.....           | 1   | 1 | seq |
| .....gguguccuaagagagcC.....             | 78  | 1 | seq |
| .....gguguccAaagagagcuc.....            | 1   | 1 | seq |
| .....ggugCccuaagagagcuc.....            | 1   | 1 | seq |
| .....gguguccuaagaCgagcuc.....           | 2   | 1 | seq |
| .....gguguccuGagagagcuc.....            | 1   | 1 | seq |
| .....gguguccuaagagagcCc.....            | 72  | 1 | seq |
| .....ggCguccuaagagagcuc.....            | 25  | 1 | seq |
| .....gguguccuaCgagagcuc.....            | 1   | 1 | seq |
| .....gguluccuaagagagcuc.....            | 3   | 1 | seq |
| .....gguguccuaagagUGgcuc.....           | 3   | 1 | seq |
| .....gguguccCaagagagcuc.....            | 10  | 1 | seq |
| .....ggugGccuaagagagcuc.....            | 1   | 1 | seq |
| .....gguguccuaagaGgagcuc.....           | 6   | 1 | seq |
| .....gguguccuaagagagcucG.....           | 14  | 1 | seq |
| .....Cguguccuaagagagcuc.....            | 2   | 1 | seq |
| .....gguguccuaGgagagcuc.....            | 18  | 1 | seq |
| .....gguguccuaagagugaUcuc.....          | 2   | 1 | seq |
| .....gguguccAaagagagcuc.....            | 1   | 1 | seq |
| .....gguguccuGagagagcuc.....            | 16  | 1 | seq |
| .....ggugucGuaagagagcuc.....            | 1   | 1 | seq |

## Star

## Mature

|                                                                                                                                      |       |   |     |
|--------------------------------------------------------------------------------------------------------------------------------------|-------|---|-----|
| caaucugggcgaaagacauuauacagguggggauuuuagcugggggggcacauc <u>aa</u> uuuaaaagauaaugu <u>ugguguccuaagagagcu</u> caaugagaauagaaaucuuugugug |       |   |     |
| .....ggGguccuaagagagcuc.....                                                                                                         | 11    | 1 | seq |
| .....gguguccuaagagGguc.....                                                                                                          | 32    | 1 | seq |
| .....gguguccuaagagagGuc.....                                                                                                         | 1     | 1 | seq |
| .....gguguccuaagagagGc.....                                                                                                          | 19    | 1 | seq |
| .....gguguccuaagauUagcuc.....                                                                                                        | 1     | 1 | seq |
| .....gUuguccuaagagagcuc.....                                                                                                         | 4     | 1 | seq |
| .....gguguccuaaAaugagcuc.....                                                                                                        | 2     | 1 | seq |
| .....gguguccuaagagagcuA.....                                                                                                         | 151   | 1 | seq |
| .....gguguccuaagagagcuc.....                                                                                                         | 7270  | 0 | seq |
| .....gguguccuaagagagcuU.....                                                                                                         | 505   | 1 | seq |
| .....gAuguccuaagagagcuc.....                                                                                                         | 4     | 1 | seq |
| .....gguguccuaagaCgagcuc.....                                                                                                        | 16    | 1 | seq |
| .....gguguccuaagaugaCcuc.....                                                                                                        | 1     | 1 | seq |
| .....gguguccuaagaugaAcuc.....                                                                                                        | 7     | 1 | seq |
| .....gguguccuCagagagcuc.....                                                                                                         | 1     | 1 | seq |
| .....Nguguccuaagagagcuc.....                                                                                                         | 7     | 1 | seq |
| .....ggAguccuaagagagcuc.....                                                                                                         | 11    | 1 | seq |
| .....ggugugCuaagagagcuc.....                                                                                                         | 1     | 1 | seq |
| .....gguguccuaUgagagcuc.....                                                                                                         | 1     | 1 | seq |
| .....gguguccuaagagagUuc.....                                                                                                         | 15    | 1 | seq |
| .....ggugucUuaagagagcuc.....                                                                                                         | 2     | 1 | seq |
| .....ggugCccuaagagagcuc.....                                                                                                         | 13    | 1 | seq |
| .....gguguccGaagagagcuc.....                                                                                                         | 1     | 1 | seq |
| .....ggugAccuaagagagcuc.....                                                                                                         | 2     | 1 | seq |
| .....gguguAcuaagagagcuc.....                                                                                                         | 1     | 1 | seq |
| .....gguguccuaGgagagcuca.....                                                                                                        | 21    | 1 | seq |
| .....gguguccCaagagagcuca.....                                                                                                        | 23    | 1 | seq |
| .....gguguccuaagagagcuAa.....                                                                                                        | 4     | 1 | seq |
| .....gguguccuaagagagcCca.....                                                                                                        | 82    | 1 | seq |
| .....Cguguccuaagagagcuca.....                                                                                                        | 7     | 1 | seq |
| .....gguguccuaagagGgcuca.....                                                                                                        | 60    | 1 | seq |
| .....ggAguccuaagagagcuca.....                                                                                                        | 8     | 1 | seq |
| .....gguguccuaagagagcucG.....                                                                                                        | 306   | 1 | seq |
| .....ggugCccuaagagagcuca.....                                                                                                        | 27    | 1 | seq |
| .....gguluccuaagagagcuca.....                                                                                                        | 5     | 1 | seq |
| .....gguguccuaagaugaUcucu.....                                                                                                       | 2     | 1 | seq |
| .....gguguccuaagauUagcuca.....                                                                                                       | 2     | 1 | seq |
| .....gguguccuaaAaugagcuca.....                                                                                                       | 5     | 1 | seq |
| .....gguguccuaagagagcuUa.....                                                                                                        | 10    | 1 | seq |
| .....gguguccuaagagagcGca.....                                                                                                        | 27    | 1 | seq |
| .....gguguccuaagagagUuca.....                                                                                                        | 13    | 1 | seq |
| .....gguguAcuaagagagcuca.....                                                                                                        | 2     | 1 | seq |
| .....gguguccuaagaugaAcucu.....                                                                                                       | 10    | 1 | seq |
| .....ggugucUuaagagagcuca.....                                                                                                        | 11    | 1 | seq |
| .....gAuguccuaagagagcuca.....                                                                                                        | 11    | 1 | seq |
| .....gguCuccuaagagagcuca.....                                                                                                        | 1     | 1 | seq |
| .....gguguUcuaagagagcuca.....                                                                                                        | 6     | 1 | seq |
| .....gguguccuUagagagcuca.....                                                                                                        | 4     | 1 | seq |
| .....ggugAccuaagagagcuca.....                                                                                                        | 6     | 1 | seq |
| .....ggCguccuaagagagcuca.....                                                                                                        | 41    | 1 | seq |
| .....gguguccuaagagUgcuca.....                                                                                                        | 4     | 1 | seq |
| .....ggugGccuaagagagcuca.....                                                                                                        | 6     | 1 | seq |
| .....gguguccAaagagagcuca.....                                                                                                        | 3     | 1 | seq |
| .....gguguccuaagauCagcuca.....                                                                                                       | 2     | 1 | seq |
| .....gguguccuaagaAgagcuca.....                                                                                                       | 2     | 1 | seq |
| .....Nguguccuaagagagcuca.....                                                                                                        | 21    | 1 | seq |
| .....gUuguccuaagagagcuca.....                                                                                                        | 3     | 1 | seq |
| .....gguguccuaagagagcuca.....                                                                                                        | 11926 | 0 | seq |
| .....gguguccuaCgagagcuca.....                                                                                                        | 1     | 1 | seq |
| .....gguguccuGagagagcuca.....                                                                                                        | 22    | 1 | seq |
| .....ggGguccuaagagagcuca.....                                                                                                        | 16    | 1 | seq |
| .....gguguccuaagaCgagcuca.....                                                                                                       | 13    | 1 | seq |
| .....gguguccuaagaGgagcuca.....                                                                                                       | 5     | 1 | seq |
| .....gguguccuCagagagcuca.....                                                                                                        | 1     | 1 | seq |
| .....gguguccuaagagagcuGa.....                                                                                                        | 1     | 1 | seq |
| .....gguguccuaUgagagcuca.....                                                                                                        | 3     | 1 | seq |
| .....gguguccuaagagagcucC.....                                                                                                        | 17    | 1 | seq |
| .....gguguccuaagagagcucU.....                                                                                                        | 61    | 1 | seq |
| .....gguguccuaagauUagcucaa.....                                                                                                      | 1     | 1 | seq |
| .....gguguccuaGgagagcucaa.....                                                                                                       | 3     | 1 | seq |

## Star

## Mature

caaucugggcgaaagacauuauacagguggggauuuuagcuggggguggcacaucaauuuaaaagauaauguuguguccuaagagagcucaaugagaauagaaaucuuugugug

|                                                |      |   |     |
|------------------------------------------------|------|---|-----|
| .....ggugAccuaagagagcucaa.....                 | 1    | 1 | seq |
| .....ggAguccuaagagagcucaa.....                 | 2    | 1 | seq |
| .....gguguccuaagagagcuUaa.....                 | 1    | 1 | seq |
| .....gguguccuGagagagcucaa.....                 | 1    | 1 | seq |
| .....gguguccuGagagagcucaa.....                 | 1    | 1 | seq |
| .....ggGguccuaagagagcucaa.....                 | 3    | 1 | seq |
| .....ggugCccuaagagagcucaa.....                 | 6    | 1 | seq |
| .....ggCguccuaagagagcucaa.....                 | 6    | 1 | seq |
| .....gguguccAaagagagcucaa.....                 | 4    | 1 | seq |
| .....gguguccuaagagagcucaa.....                 | 1689 | 0 | seq |
| .....gguguccuaagagagcucGa.....                 | 10   | 1 | seq |
| .....gguguccuaagagagcucaG.....                 | 36   | 1 | seq |
| .....gguguccuaagagagcucCa.....                 | 2    | 1 | seq |
| .....gguguccuaagagUgcucaa.....                 | 1    | 1 | seq |
| .....gguguccuUgagagcucaa.....                  | 1    | 1 | seq |
| .....gguguccuaagagagcucUa.....                 | 1    | 1 | seq |
| .....ggugucUuaagagagcucaa.....                 | 3    | 1 | seq |
| .....gguguccuaagagagcucaU.....                 | 4    | 1 | seq |
| .....gUuguccuaagagagcucaa.....                 | 1    | 1 | seq |
| .....gguguccCaagagagcucaa.....                 | 1    | 1 | seq |
| .....gguguccuaagaCgagcucaa.....                | 6    | 1 | seq |
| .....gguguccuaagaGgagcucaa.....                | 2    | 1 | seq |
| .....Nguguccuaagagagcucaa.....                 | 2    | 1 | seq |
| .....gguguccuaagagGgcucaa.....                 | 7    | 1 | seq |
| .....gguguccuaagagagcCcaa.....                 | 5    | 1 | seq |
| .....gguguccuaagaCgagcucaau.....               | 1    | 1 | seq |
| .....gguguccuaagagagcucaau.....                | 104  | 0 | seq |
| .....gguguccuaagagGgcucaau.....                | 1    | 1 | seq |
| .....gguguccuaagagagcucaaG.....                | 3    | 1 | seq |
| .....gguguccuaagagagcucaGu.....                | 1    | 1 | seq |
| .....gguguccuaagagagcucaUu.....                | 2    | 1 | seq |
| .....gguguccCaagagagcucaau.....                | 2    | 1 | seq |
| .....gguguccuaagagagcucaaA.....                | 15   | 1 | seq |
| .....gguguccuaagagagcucaaAg.....               | 7    | 1 | seq |
| .....gguguccuaagagagcucaauA.....               | 4    | 1 | seq |
| .....gguguccuaagagagcucaaug.....               | 44   | 0 | seq |
| .....gguguccuaagagagcucaUug.....               | 10   | 1 | seq |
| .....gguguccuaagagagcucaaGg.....               | 7    | 1 | seq |
| .....gguguccuaagagagcucaauga.....              | 8    | 0 | seq |
| .....gguguccuaagagagcucaaGga.....              | 1    | 1 | seq |
| .....gguguccuaagagagcucaaugU.....              | 1    | 1 | seq |
| .....gguguccuaagagagUucaauga.....              | 1    | 1 | seq |
| .....gguguccuaagagagcucaaAgag.....             | 1    | 1 | seq |
| .....gguguccuaagagagcucaaGgag.....             | 1    | 1 | seq |
| .....gguguccuaagagagcucaaugag.....             | 5    | 0 | seq |
| .....gguguccuaagagagcucaaAgaga.....            | 3    | 1 | seq |
| .....gguguccuaagagagcucaaugaga.....            | 11   | 0 | seq |
| .....gguguccuaagagagcucaaugagC.....            | 1    | 1 | seq |
| .....gguguccuaagagagcucaaAgagaa.....           | 1    | 1 | seq |
| .....gguguccuaagagagagcucaaugagaa.....         | 8    | 0 | seq |
| .....gguguccuaagagagagcucaaCgagaa.....         | 269  | 1 | seq |
| .....gguguccuaagagagagcucaaugagaaC.....        | 10   | 1 | seq |
| .....gguguccuaagagagagcucaaugagaa.....         | 1    | 0 | seq |
| .....gguguccuaagagagagcucaaugagaaCa.....       | 18   | 1 | seq |
| .....gguguccuaagagagagcucaaCgagaaua.....       | 19   | 1 | seq |
| .....gguguccuaagagagagcucaaCgagaauag.....      | 3    | 1 | seq |
| .....gguguccuaagagagagcucaaugagaaCag.....      | 2    | 1 | seq |
| .....gguguccuaagagagagcucaaCgagaauaga.....     | 2    | 1 | seq |
| .....gguguccuaagagagagcucaaugagaaCaga.....     | 2    | 1 | seq |
| .....gguguccuaagagagagcucaaCgagaauagaa.....    | 1    | 1 | seq |
| .....gguguccuaagagagagcucaaugagaaCagaaa.....   | 1    | 1 | seq |
| .....gguguccuaagagagagcucaaugagaaCagaaauc..... | 1    | 1 | seq |
| .....guguccuaagagagcC.....                     | 42   | 1 | seq |
| .....Cuguccuaagagagcu.....                     | 2    | 1 | seq |
| .....guguUcuagagagcu.....                      | 1    | 1 | seq |
| .....guguccuaagagagcG.....                     | 12   | 1 | seq |
| .....guAuccuaagagagcu.....                     | 1    | 1 | seq |
| .....guguccuaagaCgagcu.....                    | 1    | 1 | seq |
| .....guguccuaagagaaA.....                      | 1    | 1 | seq |
| .....guguccuaagagagcu.....                     | 260  | 0 | seq |

## Star

## Mature

caaucugggcgaaagacauuauacaggugggggauuuuagcuggggguggcacaucaauuuaaaagauaauuguugguguccuaagagagcucaaugagaaauagaaucuuugugug

|                                 |      |   |     |
|---------------------------------|------|---|-----|
| .....guguccCaagaugagcuc.....    | 2    | 1 | seq |
| .....guguccuaagaugaAcuc.....    | 2    | 1 | seq |
| .....gGuccuaagaugagcuc.....     | 2    | 1 | seq |
| .....guguccuaagaugagcuG.....    | 2    | 1 | seq |
| .....gugAccuaagaugagcuc.....    | 1    | 1 | seq |
| .....Uuguccuaagaugagcuc.....    | 3    | 1 | seq |
| .....guguccuaagaugGgcuc.....    | 4    | 1 | seq |
| .....guguccuCaugaugagcuc.....   | 1    | 1 | seq |
| .....Cuguccuaagaugagcuc.....    | 4    | 1 | seq |
| .....gCguccuaagaugagcuc.....    | 5    | 1 | seq |
| .....gugCccuaagaugagcuc.....    | 3    | 1 | seq |
| .....guguccuaagaugagcuA.....    | 25   | 1 | seq |
| .....guguccuGaugaugagcuc.....   | 2    | 1 | seq |
| .....guguccuaagaugUgcuc.....    | 1    | 1 | seq |
| .....guguccuaagaugagcGc.....    | 7    | 1 | seq |
| .....guguUcuagaugagcuc.....     | 2    | 1 | seq |
| .....guguccuaagaugagcCc.....    | 16   | 1 | seq |
| .....gAguccuaagaugagcuc.....    | 1    | 1 | seq |
| .....guguccuaUgaugagcuc.....    | 1    | 1 | seq |
| .....guguccuaagaugagcuc.....    | 1343 | 0 | seq |
| .....guguccuaagaugaUcuc.....    | 1    | 1 | seq |
| .....guguccuUaugaugagcuc.....   | 1    | 1 | seq |
| .....guguccuaagaugaCuc.....     | 1    | 1 | seq |
| .....guguccuaagaCgagcuc.....    | 4    | 1 | seq |
| .....guguccuaGgaugagcuc.....    | 3    | 1 | seq |
| .....guguUcuagaugagcuca.....    | 3    | 1 | seq |
| .....gCguccuaagaugagcuca.....   | 33   | 1 | seq |
| .....guguccuaagaugagcuca.....   | 7218 | 0 | seq |
| .....guguccuaagaugagcCca.....   | 52   | 1 | seq |
| .....Uuguccuaagaugagcuca.....   | 6    | 1 | seq |
| .....guguccuaagaugUgcuca.....   | 5    | 1 | seq |
| .....guCuccuaagaugagcuca.....   | 1    | 1 | seq |
| .....gugGccuaagaugagcuca.....   | 3    | 1 | seq |
| .....guguccuaagaugagcuAa.....   | 1    | 1 | seq |
| .....guguccCaagaugagcuca.....   | 11   | 1 | seq |
| .....guguccuaagaugagcGca.....   | 13   | 1 | seq |
| .....guguccuaagaAgagcuca.....   | 1    | 1 | seq |
| .....gAguccuaagaugagcuca.....   | 12   | 1 | seq |
| .....guguccuaagaugaAcuca.....   | 4    | 1 | seq |
| .....guAuccuaagaugagcuca.....   | 5    | 1 | seq |
| .....guguccuaaAaugagcuca.....   | 2    | 1 | seq |
| .....guguccuaagaugagcucC.....   | 16   | 1 | seq |
| .....guguccuaagaugagcucU.....   | 41   | 1 | seq |
| .....guguccuUaugaugagcuca.....  | 1    | 1 | seq |
| .....guguccuaagaCgagcuca.....   | 22   | 1 | seq |
| .....guguccuaUgaugagcuca.....   | 3    | 1 | seq |
| .....guguccuaagaugCgcuca.....   | 2    | 1 | seq |
| .....gugCccuaagaugagcuca.....   | 35   | 1 | seq |
| .....guguccGaagaugagcuca.....   | 1    | 1 | seq |
| .....guguccuaGgaugagcuca.....   | 14   | 1 | seq |
| .....Nuguccuaagaugagcuca.....   | 15   | 1 | seq |
| .....Cuguccuaagaugagcuca.....   | 9    | 1 | seq |
| .....guguccuaCgaugagcuca.....   | 1    | 1 | seq |
| .....guguccuaagaugagcucG.....   | 208  | 1 | seq |
| .....guguccuaagaugagUuca.....   | 7    | 1 | seq |
| .....guguccuGaugaugagcuca.....  | 11   | 1 | seq |
| .....guguccuaagaugagcuUa.....   | 10   | 1 | seq |
| .....gugAccuaagaugagcuca.....   | 4    | 1 | seq |
| .....guguccuaagaugGgcuca.....   | 29   | 1 | seq |
| .....guguGcuagaugagcuca.....    | 2    | 1 | seq |
| .....guguccuGaugaugagcucaa..... | 2    | 1 | seq |
| .....guguccuaGgaugagcucaa.....  | 2    | 1 | seq |
| .....gAguccuaagaugagcucaa.....  | 1    | 1 | seq |
| .....guguccuaagaugagcucUa.....  | 1    | 1 | seq |
| .....guguccuaagaugagcucCa.....  | 1    | 1 | seq |
| .....gCguccuaagaugagcucaa.....  | 2    | 1 | seq |
| .....guguccuaagaugagcucGa.....  | 7    | 1 | seq |
| .....guguccuaagaugagcucaa.....  | 1224 | 0 | seq |
| .....guguccuaagaugagcucaU.....  | 8    | 1 | seq |
| .....guguccCaagaugagcucaa.....  | 2    | 1 | seq |

## Star

## Mature

caaucugggcgaaagacauuauacagguggggauuuuagcuggggguggcacaucaauuuaaagauaauugguugguguccuaagagagcucaaugagaaauagaaauugugug

|                                            |      |   |     |
|--------------------------------------------|------|---|-----|
| .....guAuccuaagagagcucaa.....              | 1    | 1 | seq |
| .....guguccuaagaugaUcucaa.....             | 1    | 1 | seq |
| .....guguccuaagaCgagcucaa.....             | 2    | 1 | seq |
| .....guguccuaagaGgagcucaa.....             | 1    | 1 | seq |
| .....guguccuaagaugaAcucaa.....             | 1    | 1 | seq |
| .....guguccuaagaugGgcucaa.....             | 7    | 1 | seq |
| .....guguccuaagCugagcucaa.....             | 1    | 1 | seq |
| .....Nuguccuaagagagcucaa.....              | 2    | 1 | seq |
| .....guguccuaagaugUgcucaa.....             | 2    | 1 | seq |
| .....guguAcuaagagagcucaa.....              | 1    | 1 | seq |
| .....guguccuaagaugagUucaa.....             | 2    | 1 | seq |
| .....guguUcuagagagcucaa.....               | 1    | 1 | seq |
| .....guguccuaagaugagcCcaa.....             | 3    | 1 | seq |
| .....guguccuaagaAgagcucaa.....             | 1    | 1 | seq |
| .....guguccuaCgagagcucaa.....              | 1    | 1 | seq |
| .....gugucGuaagagagcucaau.....             | 1    | 1 | seq |
| .....guguccuaagagagcucaau.....             | 84   | 0 | seq |
| .....guguccuaagaugagGucaau.....            | 1    | 1 | seq |
| .....guguccuaagaCgagcucaau.....            | 1    | 1 | seq |
| .....gugCccuaagagagcucaau.....             | 1    | 1 | seq |
| .....guguccuaagaugagcucaaA.....            | 9    | 1 | seq |
| .....guguccuaagagagcucaaG.....             | 2    | 1 | seq |
| .....guguccuaagagagcucaaAg.....            | 8    | 1 | seq |
| .....guguccuaagagagcucaaug.....            | 52   | 0 | seq |
| .....guguccuaagagagcucaUug.....            | 10   | 1 | seq |
| .....gCguccuaagagagcucaaug.....            | 1    | 1 | seq |
| .....guguccuaagaugagcucaaGg.....           | 5    | 1 | seq |
| .....guguccuaagagagcucaaNg.....            | 1    | 1 | seq |
| .....guguccuaagaugagcucaaAg.....           | 1    | 1 | seq |
| .....guguccuaagaugagcucaauga.....          | 4    | 0 | seq |
| .....guguccuaagaugagcucaaAgag.....         | 1    | 1 | seq |
| .....guguccuaagaugagcucaaugag.....         | 8    | 0 | seq |
| .....guguccuaagaugagcucaaugaga.....        | 7    | 0 | seq |
| .....guguccuaagaugagcucaaAgaga.....        | 1    | 1 | seq |
| .....guguccuaagaugagcucaaGgagaa.....       | 1    | 1 | seq |
| .....guguccuaagaCgagcucaaugagaa.....       | 1    | 1 | seq |
| .....guguccuaagaugagcucaaugagaa.....       | 6    | 0 | seq |
| .....guguccuaagaugagcucaaugagaaC.....      | 18   | 1 | seq |
| .....guguccuaagaugagcucaaugagaaCa.....     | 19   | 1 | seq |
| .....guguccuaagaugagcucaaugagaaCag.....    | 4    | 1 | seq |
| .....guguccuaagaugagcucaaugagaaCagaaa..... | 1    | 1 | seq |
| .....uguccuaagaugGgcuc.....                | 9    | 1 | seq |
| .....uguAcuaagagagcuc.....                 | 1    | 1 | seq |
| .....uguccuaaAaugagcuc.....                | 1    | 1 | seq |
| .....uguccGaagagagcuc.....                 | 1    | 1 | seq |
| .....uguccAaagagagcuc.....                 | 2    | 1 | seq |
| .....uguccuaagaugaUcuc.....                | 1    | 1 | seq |
| .....uguccuaagagagcGc.....                 | 8    | 1 | seq |
| .....uguccuaagagagcuA.....                 | 52   | 1 | seq |
| .....uguccuaagaugagGuc.....                | 1    | 1 | seq |
| .....uguccuaagCugagcuc.....                | 1    | 1 | seq |
| .....uguccuaagagagcCc.....                 | 39   | 1 | seq |
| .....uguccuaagaugUgcuc.....                | 1    | 1 | seq |
| .....uguccuGagagagcuc.....                 | 4    | 1 | seq |
| .....Aguccuaagagagcuc.....                 | 5    | 1 | seq |
| .....uAuccuaagagagcuc.....                 | 1    | 1 | seq |
| .....uguccuaUgagagcuc.....                 | 1    | 1 | seq |
| .....uguccuaagagagcuc.....                 | 2505 | 0 | seq |
| .....uguccuaagaAgagcuc.....                | 1    | 1 | seq |
| .....Nguccuaagaugagcuc.....                | 2    | 1 | seq |
| .....uguccuaagaugCgcuc.....                | 1    | 1 | seq |
| .....uguccuaagaugagcuG.....                | 6    | 1 | seq |
| .....uguccuaagaCgagcuc.....                | 8    | 1 | seq |
| .....Cguccuaagaugagcuc.....                | 12   | 1 | seq |
| .....ugAccuaagaugagcuc.....                | 1    | 1 | seq |
| .....ugucGuaagaugagcuca.....               | 1    | 1 | seq |
| .....uguccuaagaugCgcuca.....               | 2    | 1 | seq |
| .....uguccuaagaugGgcuca.....               | 29   | 1 | seq |
| .....uguccuaaAaugagcuca.....               | 1    | 1 | seq |
| .....uguccuaagaugaUcuca.....               | 1    | 1 | seq |



## Star

## Mature

caaucugggcgaaagacauuauacagguggggauuuuagcuggggguggcacaucaauuuaaagauaauguugguguccuaagagagcucaaugagaaugaaaaucuuugugug

|                                       |      |   |     |
|---------------------------------------|------|---|-----|
| .....uguccuaagagagcCca.....           | 45   | 1 | seq |
| .....uguccuaagagagcucG.....           | 148  | 1 | seq |
| .....uguccuaagagagcuAa.....           | 3    | 1 | seq |
| .....uguccuaagagagGuca.....           | 1    | 1 | seq |
| .....uguccuaagagGgagcuca.....         | 4    | 1 | seq |
| .....uguccuaUgagagcuca.....           | 4    | 1 | seq |
| .....uguccuaagagagcucC.....           | 11   | 1 | seq |
| .....ugGccuaagagagcuca.....           | 2    | 1 | seq |
| .....uguccCaagagagcuca.....           | 8    | 1 | seq |
| .....uguccuaagaAgagcuca.....          | 1    | 1 | seq |
| .....uguccuCagagagcuca.....           | 1    | 1 | seq |
| .....uguccuaagagagcuca.....           | 5517 | 0 | seq |
| .....uguccuUgagagagcuca.....          | 2    | 1 | seq |
| .....uguccuGagagagcuca.....           | 10   | 1 | seq |
| .....Nguccuaagagagcuca.....           | 8    | 1 | seq |
| .....uguccuaagaCgagcuca.....          | 9    | 1 | seq |
| .....uguccGaagagagcuca.....           | 2    | 1 | seq |
| .....uguccuaagagagcuUa.....           | 6    | 1 | seq |
| .....ugAccuaagagagcuca.....           | 1    | 1 | seq |
| .....uguccuaagagagcucU.....           | 31   | 1 | seq |
| .....uguccAaagagagcuca.....           | 2    | 1 | seq |
| .....uguccuaagagagcuGa.....           | 1    | 1 | seq |
| .....uguccuaagaugUgcuca.....          | 8    | 1 | seq |
| .....uguUcuagagagcuca.....            | 4    | 1 | seq |
| .....Aguccuaagagagcuca.....           | 8    | 1 | seq |
| .....Cguccuaagagagcuca.....           | 24   | 1 | seq |
| .....uCuccuaagagagcuca.....           | 1    | 1 | seq |
| .....uguccuaagagagcGca.....           | 11   | 1 | seq |
| .....uAuccuaagagagcuca.....           | 4    | 1 | seq |
| .....uguccuaagCugagcucaa.....         | 1    | 1 | seq |
| .....uguccuaagagagcCcaa.....          | 2    | 1 | seq |
| .....uguccuaagagagcucUa.....          | 1    | 1 | seq |
| .....uguAcuagagagcucaa.....           | 1    | 1 | seq |
| .....uguccuaGgagagcucaa.....          | 3    | 1 | seq |
| .....Nguccuaagagagcucaa.....          | 1    | 1 | seq |
| .....uguccuaagagagcucaa.....          | 561  | 0 | seq |
| .....Aguccuaagagagcucaa.....          | 3    | 1 | seq |
| .....uguccuaagagagcuUaa.....          | 1    | 1 | seq |
| .....uguccuaagagagcucCa.....          | 3    | 1 | seq |
| .....uguccuaagagagcucaC.....          | 1    | 1 | seq |
| .....uguccuaagaugUgcucaa.....         | 1    | 1 | seq |
| .....Cguccuaagagagcucaa.....          | 3    | 1 | seq |
| .....Gguccuaagagagcucaa.....          | 2    | 1 | seq |
| .....ugCcuagagagagcucaa.....          | 2    | 1 | seq |
| .....uguccuaagaAgagcucaa.....         | 1    | 1 | seq |
| .....uguccuaagagagcucGa.....          | 3    | 1 | seq |
| .....uguccuaagaugGgcucaa.....         | 1    | 1 | seq |
| .....uguccuaagagagGucaau.....         | 1    | 1 | seq |
| .....uguccuaagagagcucaaA.....         | 7    | 1 | seq |
| .....uguccuaagagagagcucaau.....       | 69   | 0 | seq |
| .....uguccuaagagagcCcaau.....         | 1    | 1 | seq |
| .....uguccuaagagagcucaaG.....         | 1    | 1 | seq |
| .....uguccuaagGugagcucaau.....        | 1    | 1 | seq |
| .....ugucUuaagagagcucaaug.....        | 1    | 1 | seq |
| .....uguccuaagaCgagcucaaug.....       | 1    | 1 | seq |
| .....uguccuaagagagcucaaGg.....        | 5    | 1 | seq |
| .....uguccuaagagagagcucaaA.....       | 2    | 1 | seq |
| .....uguccuaagagagcucaaU.....         | 2    | 1 | seq |
| .....uguccuaagagagcucaCug.....        | 1    | 1 | seq |
| .....uguccuaagagagcucaUug.....        | 16   | 1 | seq |
| .....uguccuaagagagcucaaAg.....        | 9    | 1 | seq |
| .....uguccuaagagagagcucaaug.....      | 54   | 0 | seq |
| .....uguccuaagagagagcucaaAga.....     | 1    | 1 | seq |
| .....uguccuaagagagagcucaauga.....     | 3    | 0 | seq |
| .....uguccuaagagagagcucaaAgag.....    | 1    | 1 | seq |
| .....uguccuaagagagagcucaaugag.....    | 7    | 0 | seq |
| .....uguccuaagagagagcucaaugaga.....   | 11   | 0 | seq |
| .....uguccuaagagagagagcucaaAgaga..... | 1    | 1 | seq |
| .....uguccuaagagagagagcucaaGgaga..... | 1    | 1 | seq |
| .....uguccuaagagagagagcucaaugagG..... | 1    | 1 | seq |

## Star

## Mature

caaucuggggcgaaagacauuauucagguuggggauuuuagcuggggguggcacaucaauuaaaagauaauguugguguccuaagagagcucaaugagaauagaaaucuuugugug

|                                            |    |   |     |
|--------------------------------------------|----|---|-----|
| .....uguccuaagagagcucaaGgagaa.....         | 2  | 1 | seq |
| .....uguccuaagagagcucaaugagaa.....         | 4  | 0 | seq |
| .....uguccuaagagagcucaaugagaa.....         | 1  | 0 | seq |
| .....uguccuaagagagcucaaugagaaC.....        | 11 | 1 | seq |
| .....uguccuaagagagcucaaugagaaCa.....       | 22 | 1 | seq |
| .....uguccuaagagagcucaaugagaaCag.....      | 1  | 1 | seq |
| .....uguccuaagagagcucaaugagaaCagaa.....    | 1  | 1 | seq |
| .....uguccuaagagagcucaaugagaaCagaaauc..... | 1  | 1 | seq |
| .....guccuaagagagcuca.....                 | 31 | 0 | seq |
| .....guccuaagagagcucU.....                 | 1  | 1 | seq |
| .....guccuaagagagcucG.....                 | 1  | 1 | seq |
| .....guccuaagagagcucaa.....                | 5  | 0 | seq |
| .....guccuaagagagcucaau.....               | 2  | 0 | seq |
| .....uUcuaagagagcucaa.....                 | 1  | 1 | seq |
| .....uccuaagagagcucaa.....                 | 20 | 0 | seq |
| .....uccuaagagagcucaaA.....                | 1  | 1 | seq |
| .....uccuaagagagcucaaG.....                | 1  | 1 | seq |
| .....uccuaagagagcucaau.....                | 2  | 0 | seq |
| .....uccuaagauUagcucaau.....               | 1  | 1 | seq |
| .....ccuaagagagcucaau.....                 | 40 | 0 | seq |
| .....ccuaagagagcCcaau.....                 | 1  | 1 | seq |
| .....ccCaagagagcucaau.....                 | 1  | 1 | seq |
| .....ccuaagagagcucaaA.....                 | 6  | 1 | seq |
| .....ccuaagagagcucGau.....                 | 1  | 1 | seq |
| .....ccuaagagagcucaaug.....                | 39 | 0 | seq |
| .....ccuaagagagcucaaGg.....                | 4  | 1 | seq |
| .....ccuaagagagcucaUug.....                | 5  | 1 | seq |
| .....ccuaagagagcucaaAg.....                | 7  | 1 | seq |
| .....ccuaagagagcucaauga.....               | 3  | 0 | seq |
| .....ccuaagagagcucaaAgA.....               | 1  | 1 | seq |
| .....ccuaagagagcucaauGU.....               | 1  | 1 | seq |
| .....ccuaagagagcucaaAgag.....              | 2  | 1 | seq |
| .....ccuaagagagcucaaugag.....              | 3  | 0 | seq |
| .....Gcuagagagcucaaugag.....               | 1  | 1 | seq |
| .....ccuaagagagcucaaugaga.....             | 6  | 0 | seq |
| .....ccuaagagagcucaaugagaa.....            | 5  | 0 | seq |
| .....ccuaagagagcucaaugagaaCag.....         | 1  | 1 | seq |
| .....ccuaagagagcucaaugagaaCagaa.....       | 1  | 1 | seq |
| .....ccuaagagagcucaaugagaaCagaaa.....      | 1  | 1 | seq |
| .....cuaagaCgagcucaaug.....                | 1  | 1 | seq |
| .....cuaagagagcucaUug.....                 | 5  | 1 | seq |
| .....cuaagGugagcucaaug.....                | 1  | 1 | seq |
| .....cuaagagagcucaaug.....                 | 20 | 0 | seq |
| .....cuaagagagcucaaGg.....                 | 3  | 1 | seq |
| .....cuaagagagcucaaAg.....                 | 1  | 1 | seq |
| .....cuaagagagcucaaGga.....                | 2  | 1 | seq |
| .....cuaagagagcucaauga.....                | 3  | 0 | seq |
| .....cuaagagagcucaaAgag.....               | 1  | 1 | seq |
| .....cuaagagagcucaaugag.....               | 2  | 0 | seq |
| .....cuaagagagcucaaugUg.....               | 1  | 1 | seq |
| .....cuaagagagcucaaugaga.....              | 6  | 0 | seq |
| .....cuaagagagcucaaGgagaa.....             | 1  | 1 | seq |
| .....cuaagagagcucaaugagaa.....             | 4  | 0 | seq |
| .....cuaagagagcucaaugagaa.....             | 1  | 0 | seq |
| .....cuaagagagcucaaugagaaCag.....          | 1  | 1 | seq |
| .....cuaagagagcucaaugagaaCagaaa.....       | 1  | 1 | seq |
| .....uaagagagagcucaauga.....               | 2  | 0 | seq |
| .....uaagagagagcucaaGgag.....              | 1  | 1 | seq |
| .....uaagagagagcucaaugaA.....              | 2  | 1 | seq |
| .....uaagagUgcucaaugag.....                | 1  | 1 | seq |
| .....uaagagagagcucaaugag.....              | 4  | 0 | seq |
| .....uaagagagagcucaaugUg.....              | 1  | 1 | seq |
| .....uaagagagagcucaaAgag.....              | 1  | 1 | seq |
| .....uaagagagagcucaaGgaga.....             | 2  | 1 | seq |
| .....uaagagagagcucaaAgaga.....             | 1  | 1 | seq |
| .....uaagagagagcucaaugaga.....             | 10 | 0 | seq |
| .....uaagagagagcucaaugagaa.....            | 4  | 0 | seq |
| .....uaagagagagcucaaAgagaa.....            | 1  | 1 | seq |
| .....uaagagagagcucaaugagaa.....            | 1  | 0 | seq |
| .....uaagagagagcucaaugagaaCag.....         | 2  | 1 | seq |

## Star

## Mature

|                                                                                                               |    |   |     |
|---------------------------------------------------------------------------------------------------------------|----|---|-----|
| caaucugggCGaaagacauuauCagggggauuuuagcugggggGgcacaucaauuuaaagauaauguugguguccuaagagagcucaaugagaaugaaaucuuugugug |    |   |     |
| .....uaagagagcucaaugagaaCagaa.....                                                                            | 1  | 1 | seq |
| .....aagagagcucaaugag.....                                                                                    | 4  | 0 | seq |
| .....aagagagcucaaugA.....                                                                                     | 1  | 1 | seq |
| .....aagagagcucaaugaga.....                                                                                   | 7  | 0 | seq |
| .....aagagagcucaaugaUa.....                                                                                   | 1  | 1 | seq |
| .....aagagagcucaaAgaga.....                                                                                   | 1  | 1 | seq |
| .....aagagagcucaaugagaa.....                                                                                  | 6  | 0 | seq |
| .....Gagagagcucaaugagaa.....                                                                                  | 1  | 1 | seq |
| .....aagagagcucaaugagaaCag.....                                                                               | 3  | 1 | seq |
| .....aagagagcucaaugagaaCaga.....                                                                              | 1  | 1 | seq |
| .....aagagagcucaaugagaaCagaa.....                                                                             | 1  | 1 | seq |
| .....aagagagcucaaugagaaCagaaa.....                                                                            | 1  | 1 | seq |
| .....aagagagcucaaugagaaCagaaauc.....                                                                          | 1  | 1 | seq |
| .....agagagcucaaAgaga.....                                                                                    | 8  | 1 | seq |
| .....agagagcucaaugaga.....                                                                                    | 24 | 0 | seq |
| .....agagagcucaaGgaga.....                                                                                    | 5  | 1 | seq |
| .....agagagcucaaugagU.....                                                                                    | 2  | 1 | seq |
| .....agagagcucaaAgagaa.....                                                                                   | 1  | 1 | seq |
| .....agagagcucaaGgagaa.....                                                                                   | 3  | 1 | seq |
| .....agagagcucaaugagaa.....                                                                                   | 20 | 0 | seq |
| .....agagagcucaaugagaa.....                                                                                   | 1  | 0 | seq |
| .....agagagcucaaGgagaa.....                                                                                   | 1  | 1 | seq |
| .....agagagcucaaugagaaCag.....                                                                                | 10 | 1 | seq |
| .....agagagcucaaugagaaCaga.....                                                                               | 7  | 1 | seq |
| .....agagagcucaaugagaaCagaa.....                                                                              | 7  | 1 | seq |
| .....agagagcucaaugagaaCagaaa.....                                                                             | 1  | 1 | seq |
| .....agagagcucaaugagaaCagaaa.....                                                                             | 2  | 1 | seq |
| .....gagagcucaaugagaa.....                                                                                    | 14 | 0 | seq |
| .....gagUgcucaaugagaa.....                                                                                    | 1  | 1 | seq |
| .....gagagcucaaugagaaCag.....                                                                                 | 1  | 1 | seq |
| .....gagagcucaaCgagaaugagaaaucuu.....                                                                         | 1  | 1 | seq |
| .....augagcucaaugagaa.....                                                                                    | 1  | 0 | seq |
| .....augagcucaaugagaaCagaaauc.....                                                                            | 1  | 1 | seq |
| .....ugagcucaaCgagaaugagaaaucuu.....                                                                          | 1  | 1 | seq |
| .....agcucaaugagaaCagaaauc.....                                                                               | 2  | 1 | seq |
| .....gcucaaugagaaCagaaauc.....                                                                                | 1  | 1 | seq |
| .....gagaaCagaaaucuu.....                                                                                     | 1  | 1 | seq |
| .....agaaCagaaaucuu.....                                                                                      | 1  | 1 | seq |
| .....agaaCagaaaucuu.....                                                                                      | 1  | 1 | seq |
| .....agaaugagaaaucCgugug.....                                                                                 | 1  | 1 | seq |
| .....gaaCagaaaucuu.....                                                                                       | 2  | 1 | seq |

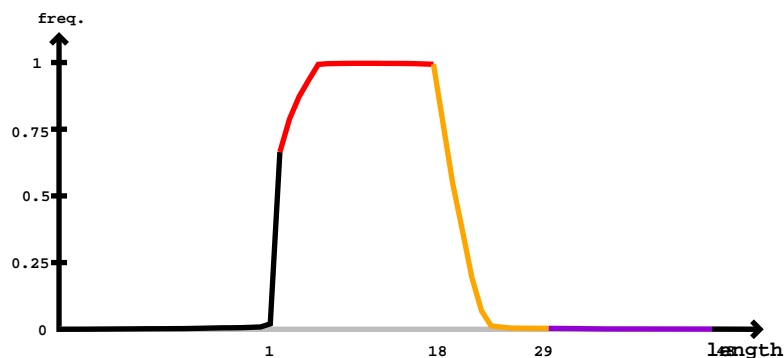

| 5' | uaaguuuguuguaguuaaaaaaacucguaguuggaucuuugggucauaaaggguccugucugccuacucggugugc | -3'   | obs |        |
|----|------------------------------------------------------------------------------|-------|-----|--------|
|    | uaaguuuguuguaguuaaaaaaacucguaguuggaucuuugggucauaaaggguccugucugccuacucggugugc |       | exp |        |
|    | .....(((.(((.((((.(...(.(.(...).)))))...)))).))....                          | reads | mm  | sample |
|    | uaaguuuguugCaguuaaaaaaacucgua.....                                           | 3     | 1   | seq    |
|    | uaaguuuguugCaguuaaaaaaacucguagu.....                                         | 1     | 1   | seq    |
|    | uaaguuuguugCaguuaaaaaaacucguagu.....                                         | 1     | 1   | seq    |
|    | uaaguuuguugCaguuaaaaaaacucguaguugg.....                                      | 2     | 1   | seq    |
|    | uaaguuuguugCaguuaaaaaaacucguaguuggaucuu.....                                 | 1     | 1   | seq    |
|    | uaaguuuguugCaguuaaaaaaacucguaguuggaucuu.....                                 | 1     | 1   | seq    |
|    | .aaguuuguugCaguuaaaaaa.....                                                  | 2     | 1   | seq    |
|    | .aaguuuguugCaguuaaaaaaacucguag.....                                          | 1     | 1   | seq    |
|    | .aaguuuguugCaguuaaaaaaacucguaguuggauc.....                                   | 1     | 1   | seq    |
|    | ..aguuguuguaguuaaaaa.....                                                    | 1     | 0   | seq    |
|    | ..aguuguugCaguuaaaaaa.....                                                   | 1     | 1   | seq    |
|    | ..aguuguuguaguuaaaaaaacuc.....                                               | 1     | 0   | seq    |
|    | ..aguuguugCaguuaaaaaaacucg.....                                              | 1     | 1   | seq    |
|    | ..aguuguugCaguuaaaaaaacucgu.....                                             | 1     | 1   | seq    |
|    | ..aguuguugCaguuaaaaaaacucgu.....                                             | 1     | 1   | seq    |
|    | ..aguuguugCaguuaaaaaaacucguag.....                                           | 1     | 1   | seq    |
|    | ..aguuguugCaguuaaaaaaacucguaguug.....                                        | 1     | 1   | seq    |
|    | ..aguuguugCaguuaaaaaaacucguaguuggaucuu.....                                  | 2     | 1   | seq    |
|    | ..aguuguugCaguuaaaaaaacucguaguuggaucuu.....                                  | 1     | 1   | seq    |
|    | ..aguuguugCaguuaaaaaaacucguaguuggaucuu.....                                  | 1     | 1   | seq    |
|    | ..guuguugCaguuaaaaaaacuc.....                                                | 1     | 1   | seq    |
|    | ..guuguugCaguuaaaaaaacucgu.....                                              | 1     | 1   | seq    |
|    | ..guuguugCaguuaaaaaaacucgua.....                                             | 4     | 1   | seq    |
|    | ..guuguugCaguuaaaaaaacucguagu.....                                           | 1     | 1   | seq    |
|    | ..guuguugCaguuaaaaaaacucguaguug.....                                         | 1     | 1   | seq    |
|    | ..guuguugCaguuaaaaaaacucguaguugga.....                                       | 1     | 1   | seq    |
|    | ..guuguugCaguuaaaaaaacucguaguuggauc.....                                     | 1     | 1   | seq    |
|    | ..guuguugCaguuaaaaaaacucguaguuggaucuu.....                                   | 1     | 1   | seq    |
|    | ..guuguugCaguuaaaaaaacucguaguuggaucuu.....                                   | 1     | 1   | seq    |
|    | ..guuguugCaguuaaaaaaacucguaguuggaucuu.....                                   | 1     | 1   | seq    |
|    | ..uuuguugCaguuaaaaaa.....                                                    | 1     | 1   | seq    |
|    | ..uuuguugCaguuaaaaaaacucguag.....                                            | 2     | 1   | seq    |
|    | ..uuuguugCaguuaaaaaaacucguaguugg.....                                        | 3     | 1   | seq    |
|    | ..uuuguugCaguuaaaaaaacucguaguugga.....                                       | 1     | 1   | seq    |

## Star

|                                                   |   |   |     |
|---------------------------------------------------|---|---|-----|
| ...uuguugCaguuaaaaaaacucguaguuggau.....           | 1 | 1 | seq |
| ...uuguugCaguuaaaaaaacucguaguuggauc.....          | 1 | 1 | seq |
| ...uuguugCaguuaaaaaaacucguaguuggaucu.....         | 5 | 1 | seq |
| ...uuguugCaguuaaaaaaacucguaguuggaucuu.....        | 1 | 1 | seq |
| ...uuguugCaguuaaaaaaac.....                       | 1 | 1 | seq |
| ...uuguugCaguuaaaaaaacucguag.....                 | 1 | 1 | seq |
| ...uuguugCaguuaaaaaaacucguaguuggauc.....          | 1 | 1 | seq |
| ...uuguugCaguuaaaaaaacucguaguuggaucuu.....        | 3 | 1 | seq |
| ...uuguugCaguuaaaaaaacucguaguuggaucuuggg.....     | 1 | 1 | seq |
| ...guugCaguuaaaaaaacucgua.....                    | 1 | 1 | seq |
| ...guugCaguuaaaaaaacucguaguugg.....               | 2 | 1 | seq |
| ...guugCaguuaaaaaaacucguaguuggauc.....            | 1 | 1 | seq |
| ...guugCaguuaaaaaaacucguaguuggaucu.....           | 2 | 1 | seq |
| ...guugCaguuaaaaaaacucguaguuggaucuug.....         | 1 | 1 | seq |
| ...guugCaguuaaaaaaacucguaguuggaucuugggu.....      | 1 | 1 | seq |
| ...guugCaguuaaaaaaacucguaguuggaucuuggguc.....     | 1 | 1 | seq |
| ...uugCaguuaaaaaaacucguag.....                    | 1 | 1 | seq |
| ...uugCaguuaaaaaaacucguaguugg.....                | 1 | 1 | seq |
| ...uugCaguuaaaaaaacucguaguuggau.....              | 1 | 1 | seq |
| ...uugCaguuaaaaaaacucguaguuggauc.....             | 5 | 1 | seq |
| ...uugCaguuaaaaaaacucguaguuggaucuu.....           | 4 | 1 | seq |
| ...uugCaguuaaaaaaacucguaguuggaucuu.....           | 3 | 1 | seq |
| ...uugCaguuaaaaaaacucguaguuggaucuug.....          | 2 | 1 | seq |
| ...uugCaguuaaaaaaacucguaguuggaucuuggg.....        | 2 | 1 | seq |
| ...ugCaguuaaaaaaacucguaguugga.....                | 1 | 1 | seq |
| ...ugCaguuaaaaaaacucguaguuggau.....               | 1 | 1 | seq |
| ...ugCaguuaaaaaaacucguaguuggaucuug.....           | 1 | 1 | seq |
| ...gCaguuaaaaaaacucguaguuggaucu.....              | 2 | 1 | seq |
| ...gCaguuaaaaaaacucguaguuggaucuu.....             | 1 | 1 | seq |
| ...gCaguuaaaaaaacucguaguuggaucuug.....            | 1 | 1 | seq |
| ...gCaguuaaaaaaacucguaguuggaucuugg.....           | 1 | 1 | seq |
| ...gCaguuaaaaaaacucguaguuggaucuuggguc.....        | 1 | 1 | seq |
| ...Caguuaaaaaaacucguag.....                       | 1 | 1 | seq |
| ...Caguuaaaaaaacucguagu.....                      | 1 | 1 | seq |
| ...Caguuaaaaaaacucguaguuggau.....                 | 1 | 1 | seq |
| ...Caguuaaaaaaacucguaguuggaucu.....               | 2 | 1 | seq |
| ...Caguuaaaaaaacucguaguuggaucuu.....              | 1 | 1 | seq |
| ...Caguuaaaaaaacucguaguuggaucuug.....             | 2 | 1 | seq |
| ...Caguuaaaaaaacucguaguuggaucuugg.....            | 1 | 1 | seq |
| ...Caguuaaaaaaacucguaguuggaucuugggu.....          | 1 | 1 | seq |
| ...aguuaaaaaaacucguaguuggau.....                  | 1 | 0 | seq |
| ...aguuaaaaaaacucguaguuggauc.....                 | 1 | 0 | seq |
| ...aguuaaaaaaacucguaguuggaucuC.....               | 1 | 1 | seq |
| ...aguuaaaaaaacucguaguuggaucuuggg.....            | 1 | 0 | seq |
| ...aguuaaaaaaacucguaguuggaucuuggguc.....          | 1 | 0 | seq |
| ...aguuaaaaaaacucguaguuggaucuugggucGu.....        | 1 | 1 | seq |
| ...guuaaaaaaacucguagu.....                        | 2 | 0 | seq |
| ...guuaaaaaaacucguagC.....                        | 2 | 1 | seq |
| ...guuaaaaaaacucguaguC.....                       | 2 | 1 | seq |
| ...guuaaaaaaacucguaguugg.....                     | 1 | 0 | seq |
| ...guuaaaaaaCcucguaguuggau.....                   | 1 | 1 | seq |
| ...guuaaaaaaacucguaguuggauŦ.....                  | 1 | 1 | seq |
| ...guuaaaaaaCcucguaguuggauc.....                  | 1 | 1 | seq |
| ...guuaaaaaaacucguaguuggauc.....                  | 5 | 0 | seq |
| ...guuaaaaaaacucguaguuggaucA.....                 | 1 | 1 | seq |
| ...guuaaaaaaacucguaguuggaucu.....                 | 2 | 0 | seq |
| ...guuaaaaaaacucguaguuggaucuu.....                | 1 | 0 | seq |
| ...guuaaaaaaacucguaguuggaucuug.....               | 3 | 0 | seq |
| ...guuaaaaaaacucguaguuggaucuugg.....              | 1 | 0 | seq |
| ...guuaaaaaaacucguaguuggaucuuggg.....             | 1 | 0 | seq |
| ...guuaaaaaaacucguaguuggaucuugggu.....            | 1 | 0 | seq |
| ...guuaaaaaaacucguaguuggaucuugggucGu.....         | 1 | 1 | seq |
| ...guuaaaaaaacucguaguuggaucuugggucGua.....        | 1 | 1 | seq |
| ...guuaaaaaaacucguaguuggaucuugggucGuaa.....       | 2 | 1 | seq |
| ...guuaaaaaaacucguaguuggaucuugggucGuaaa.....      | 1 | 1 | seq |
| ...guuaaaaaaacucguaguuggaucuugggucGuaaaggucg..... | 1 | 1 | seq |
| ...uuuaaaaaaacucguaguugg.....                     | 7 | 0 | seq |
| ...uuuaaaaaaacucguaguuggA.....                    | 1 | 1 | seq |
| ...uuuaaaaaaacucguaguugga.....                    | 2 | 0 | seq |

## Mature

## Star

uaaguuguuguaguuaaaaaacucguaguuggaucuugggucuaaaaggucggucugccuacucggugugc

|                                                      |   |   |     |
|------------------------------------------------------|---|---|-----|
| .....uuaaaaaacucguaguuggau.....                      | 4 | 0 | seq |
| .....uuaaaaaCcucguaguuggau.....                      | 1 | 1 | seq |
| .....uuaaaaaacucguaguuggaucu.....                    | 2 | 0 | seq |
| .....uuaaaaaacucguaguuggaucuu.....                   | 1 | 0 | seq |
| .....uuaaaaaGacucguaguuggaucuu.....                  | 1 | 1 | seq |
| .....uuaaaaaacucguaguuggaucuug.....                  | 6 | 0 | seq |
| .....uuaaaaaacucguaguuggaucuugg.....                 | 1 | 0 | seq |
| .....uuaaaaaacucguaguuggaucuuggg.....                | 3 | 0 | seq |
| .....uuaaaaaacucguaguuggaucuugggu.....               | 1 | 0 | seq |
| .....uuaaaaaacucguaguuggaucuugggucGua.....           | 1 | 1 | seq |
| .....uuaaaaaacucguaguuggaucuugggucGuaaa.....         | 1 | 1 | seq |
| .....uuaaaaaacucguaguugg.....                        | 7 | 0 | seq |
| .....uuaaaaaacucguaguugC.....                        | 1 | 1 | seq |
| .....uuaaaaaacucguaguuggau.....                      | 2 | 0 | seq |
| .....uuaaaaaacucguaguuggauc.....                     | 3 | 0 | seq |
| .....Caataaacucguaguuggauc.....                      | 1 | 1 | seq |
| .....uuaaaaaacucguaguuggaGc.....                     | 1 | 1 | seq |
| .....uuaaaaaacucguaguuggaucu.....                    | 5 | 0 | seq |
| .....uuaaaaaacucguaguuggaucA.....                    | 1 | 1 | seq |
| .....uaGaaaacucguaguuggaucu.....                     | 1 | 1 | seq |
| .....uuaaaaaacucguaguuggaucuu.....                   | 3 | 0 | seq |
| .....uuaaaaaacucguaguuggaucuC.....                   | 1 | 1 | seq |
| .....uuaaaaaacucguaguuggaucuug.....                  | 2 | 0 | seq |
| .....Caataaacucguaguuggaucuugg.....                  | 1 | 1 | seq |
| .....Aataaacucguaguuggaucuuggg.....                  | 1 | 1 | seq |
| .....uuaaaaaacucguaguuggaucuuggg.....                | 3 | 0 | seq |
| .....uuaaaaaacucguaguuggaucuugggC.....               | 2 | 1 | seq |
| .....uuaaaaaacucguaguuggaucuugggu.....               | 1 | 0 | seq |
| .....uuaaaaaacucguaguuggaucuugggucGu.....            | 1 | 1 | seq |
| .....uuaaaaaacucguaguuggaucuugggucGuaaaggucgguc..... | 1 | 1 | seq |
| .....uuaaaaaGcucguaguuggaucuugggucuaaaaggucgguc..... | 1 | 1 | seq |
| .....aaGaaaacucguaguugg.....                         | 1 | 1 | seq |
| .....aataaacucguaguugg.....                          | 2 | 0 | seq |
| .....aaaaaacucguaguugga.....                         | 8 | 0 | seq |
| .....aaaaaacucguaguuggauc.....                       | 7 | 0 | seq |
| .....aaaaaacucguaguuggaucu.....                      | 2 | 0 | seq |
| .....aaaaaacucAuaaguuggaucuugg.....                  | 1 | 1 | seq |
| .....aaaaaacucguaguuggaucuugg.....                   | 1 | 0 | seq |
| .....aaaaaacucguaguuggaucuuggg.....                  | 4 | 0 | seq |
| .....aaaaaacucguaguuggaucuugggucG.....               | 1 | 1 | seq |
| .....aaaaaacucguaguuggaucuugggucGua.....             | 1 | 1 | seq |
| .....aaaaaacucguaguuggaucuugggucGuaaag.....          | 1 | 1 | seq |
| .....aaaaCcucguaguugga.....                          | 1 | 1 | seq |
| .....aaaaaacucguaguuggauA.....                       | 1 | 1 | seq |
| .....aaaaaacucguaguuggaucu.....                      | 1 | 0 | seq |
| .....aaaaaacucguaguuggaucuugg.....                   | 1 | 0 | seq |
| .....aaaaaacucguaguuggaucuugggucGua.....             | 1 | 1 | seq |
| .....aaaacucguaguuggau.....                          | 3 | 0 | seq |
| .....aaaacucguaguuggauc.....                         | 3 | 0 | seq |
| .....aaaacucguaguuggauU.....                         | 1 | 1 | seq |
| .....aaaacucguaguuggaucC.....                        | 1 | 1 | seq |
| .....aaaacucguaguuggaucu.....                        | 5 | 0 | seq |
| .....aaaacucguaguuggaucuu.....                       | 2 | 0 | seq |
| .....aaaCcucguaguuggaucuug.....                      | 2 | 1 | seq |
| .....aaaacucguaguuggaucuug.....                      | 4 | 0 | seq |
| .....aaaacucguaguuggaucuuggg.....                    | 2 | 0 | seq |
| .....aaaacucguaguuggaucuugggucG.....                 | 1 | 1 | seq |
| .....aaaacucguaguuggaucuugggucGu.....                | 2 | 1 | seq |
| .....aaaacucguaguuggaucuugggucGua.....               | 2 | 1 | seq |
| .....aaaacucguaguuggaucuugggucGuaaa.....             | 2 | 1 | seq |
| .....aaacucguaguuggauU.....                          | 1 | 1 | seq |
| .....aaacucgAaguuggauc.....                          | 1 | 1 | seq |
| .....aaacucguaAuuuggauc.....                         | 1 | 1 | seq |
| .....aaCcucguaguuggauc.....                          | 1 | 1 | seq |
| .....aaacucguaguuggauc.....                          | 1 | 0 | seq |
| .....aaacucguaguuggaucu.....                         | 7 | 0 | seq |
| .....aaacucguaguuggaucC.....                         | 1 | 1 | seq |
| .....aaacucguaguuggaucuu.....                        | 1 | 0 | seq |
| .....aaacucguaguuggaucuug.....                       | 8 | 0 | seq |
| .....aaacucguaguuggGucuu.....                        | 1 | 1 | seq |

## Mature

## Star

uaaguuguuguaguuaaaaaacucguaguuggaucuugggucauaaaggucggucugccuacucggugugc

|                                                |    |   |     |
|------------------------------------------------|----|---|-----|
| .....Gaacucguaguuggaucuug.....                 | 1  | 1 | seq |
| .....aaCcucguaguuggaucuug.....                 | 2  | 1 | seq |
| .....aaacucguaguuggaucuuA.....                 | 4  | 1 | seq |
| .....aaacucguaguuggaucuugg.....                | 4  | 0 | seq |
| .....aaacucguaguugAaucuugg.....                | 1  | 1 | seq |
| .....aaacucguaguuggaucuuggC.....               | 1  | 1 | seq |
| .....aaacucguaguuggaucuuggg.....               | 3  | 0 | seq |
| .....aaacucguaguuggaucuuggguc.....             | 1  | 0 | seq |
| .....aaacucguaguuggaucuugggucG.....            | 1  | 1 | seq |
| .....aaacucguaguuggaucuugggucGu.....           | 3  | 1 | seq |
| .....aaacucguaguuggaucuugggucGua.....          | 5  | 1 | seq |
| .....aaacucguaguuggaucuugggucGuaa.....         | 1  | 1 | seq |
| .....aaacucguaguuggaucuugggucGuaaaggucgg.....  | 1  | 1 | seq |
| .....aCcucguaguuggaucu.....                    | 1  | 1 | seq |
| .....aNcucguaguuggaucu.....                    | 1  | 1 | seq |
| .....aacucguaguuggaucu.....                    | 6  | 0 | seq |
| .....aacucguaguuggaucuC.....                   | 1  | 1 | seq |
| .....aaUucguaguuggaucuu.....                   | 1  | 1 | seq |
| .....aacucguaguuggaucuu.....                   | 5  | 0 | seq |
| .....aCcucguaguuggaucuug.....                  | 1  | 1 | seq |
| .....aacucguaguuggaucuug.....                  | 10 | 0 | seq |
| .....aNcucguaguuggaucuug.....                  | 1  | 1 | seq |
| .....aacucguaguuggaucuugA.....                 | 1  | 1 | seq |
| .....aCcucguaguuggaucuugg.....                 | 1  | 1 | seq |
| .....aacucguaguuggaucuugg.....                 | 2  | 0 | seq |
| .....aacucguaguuggaucuuggg.....                | 4  | 0 | seq |
| .....aCcucguaguuggaucuuggg.....                | 2  | 1 | seq |
| .....Cacucguaguuggaucuugggu.....               | 1  | 1 | seq |
| .....aacucguaguuggaucuuAgguc.....              | 1  | 1 | seq |
| .....aacucguaguuggaucuugggucG.....             | 5  | 1 | seq |
| .....aacucguaguuggaucuugggucA.....             | 1  | 0 | seq |
| .....aacucguaguuggaucuugggucGu.....            | 9  | 1 | seq |
| .....aacucguaguuggaucuugggucGua.....           | 6  | 1 | seq |
| .....aacucguaguuggaucuugggucGuaa.....          | 4  | 1 | seq |
| .....aacucguaguuggaucuugggucGuaaa.....         | 2  | 1 | seq |
| .....aacucguaguuggaucuugggucGuaaag.....        | 1  | 1 | seq |
| .....aacucguaguuggaucuugggucGuaaaggucgguc..... | 1  | 1 | seq |
| .....acucguaguuggaucuG.....                    | 1  | 1 | seq |
| .....acCcguaguuggaucuu.....                    | 1  | 1 | seq |
| .....Ncucguaguuggaucuu.....                    | 8  | 1 | seq |
| .....acucguaguuggaucuu.....                    | 17 | 0 | seq |
| .....acucguaguuggaucuC.....                    | 3  | 1 | seq |
| .....Ccucguaguuggaucuu.....                    | 3  | 1 | seq |
| .....acucCuaguuggaucuug.....                   | 1  | 1 | seq |
| .....acucguaguuggaucuuA.....                   | 2  | 1 | seq |
| .....acucguaguuggaucuug.....                   | 35 | 0 | seq |
| .....Ccucguaguuggaucuug.....                   | 8  | 1 | seq |
| .....Ncucguaguuggaucuug.....                   | 39 | 1 | seq |
| .....acAcguaguuggaucuug.....                   | 1  | 1 | seq |
| .....Ncucguaguuggaucuugg.....                  | 10 | 1 | seq |
| .....acucguaguuggaucuuAg.....                  | 1  | 1 | seq |
| .....Ccucguaguuggaucuugg.....                  | 5  | 1 | seq |
| .....acucguaguuggaucuugg.....                  | 18 | 0 | seq |
| .....acucguagCuggaucuuggg.....                 | 1  | 1 | seq |
| .....Ccucguaguuggaucuuggg.....                 | 2  | 1 | seq |
| .....acucguaguuggaucuuggA.....                 | 2  | 1 | seq |
| .....acucguaguuggaucuCggg.....                 | 1  | 1 | seq |
| .....acGcguaguuggaucuuggg.....                 | 1  | 1 | seq |
| .....acucguaguuggaucuuggC.....                 | 1  | 1 | seq |
| .....Ncucguaguuggaucuuggg.....                 | 19 | 1 | seq |
| .....acucguaguuggaucuuggg.....                 | 24 | 0 | seq |
| .....acCcguaguuggaucuuggg.....                 | 1  | 1 | seq |
| .....Ncucguaguuggaucuugggu.....                | 4  | 1 | seq |
| .....Ccucguaguuggaucuugggu.....                | 2  | 1 | seq |
| .....acAcguaguuggaucuugggu.....                | 1  | 1 | seq |
| .....acucguaguuggaucuugggu.....                | 2  | 0 | seq |
| .....acucguaguAgaucuuggguc.....                | 1  | 1 | seq |
| .....acucguaguuggaucuuggguc.....               | 32 | 0 | seq |
| .....acucguaguuggaucuuggguU.....               | 2  | 1 | seq |
| .....Ncucguaguuggaucuuggguc.....               | 21 | 1 | seq |

## Mature

## Star

uaaguuguuguaguuaaaaaacucguaguuggaucuugggucauaaaggucggucugccuacucggugugc

|                                       |       |   |     |
|---------------------------------------|-------|---|-----|
| .Ccucguaguuggaucuuggguc               | 2     | 1 | seq |
| .acucguaguuggaucuugggucG              | 33    | 1 | seq |
| .acucguaguuggaucuugggucU              | 2     | 1 | seq |
| .acucguaguuggaucuugggucC              | 2     | 1 | seq |
| .acucguaguuggaucuugggucA              | 4     | 0 | seq |
| .NcucguaguuggaucuugggucA              | 4     | 1 | seq |
| .acucguaguuggaucuugggucAu             | 1     | 0 | seq |
| .acucguaguuggaucuugggucGu             | 88    | 1 | seq |
| .acucguaguuggaucuugggucGua            | 83    | 1 | seq |
| .acucguaguuggaucuugggucAua            | 1     | 0 | seq |
| .acucguaguuggaucuugggucGuaa           | 9     | 1 | seq |
| .acucguaguuggaucuugggucGuaaa          | 3     | 1 | seq |
| .acucguaguuggaucuugggucGuaaag         | 4     | 1 | seq |
| .acucguaguuggaucuugggucGuaaagg        | 2     | 1 | seq |
| .acucguaguuggaucuugggucGuaaaggu       | 3     | 1 | seq |
| .acucguaguuggaucuugggucGuaaagguc      | 4     | 1 | seq |
| .acucguaguuggaucuugggucGuaaaggucg     | 1     | 1 | seq |
| .acucguaguuggaucuugggucGuaaaggucggu   | 2     | 1 | seq |
| .acucguaguuggaucuugggucGuaaaggucgguc  | 2     | 1 | seq |
| .acucguaguuggaucuugggucGuaaaggucggucu | 4     | 1 | seq |
| .cucguaguCggaucuug                    | 26    | 1 | seq |
| .cucguaguuggaucCug                    | 40    | 1 | seq |
| .cucguagAuggaucuuug                   | 1     | 1 | seq |
| .cuAuguaguuggaucuuug                  | 4     | 1 | seq |
| .cucguaguAuggaucuuug                  | 3     | 1 | seq |
| .cucguaguuggaGcuug                    | 4     | 1 | seq |
| .cucgGaguuggaucuuug                   | 5     | 1 | seq |
| .cucguagCuggaucuuug                   | 18    | 1 | seq |
| .cucguaguuggaCcuug                    | 30    | 1 | seq |
| .Gucguaguuggaucuuug                   | 16    | 1 | seq |
| .cAuguaguuggaucuuug                   | 8     | 1 | seq |
| .cucguaguuggaucAug                    | 7     | 1 | seq |
| .cucguaguuggaucuuU                    | 20    | 1 | seq |
| .cucguGguuggaucuuug                   | 23    | 1 | seq |
| .cucguaguuggaAuguug                   | 2     | 1 | seq |
| .cucguCguuggaucuuug                   | 2     | 1 | seq |
| .cucguaguuggaucGug                    | 24    | 1 | seq |
| .cucguaguuCgaucuuug                   | 2     | 1 | seq |
| .Nucguaguuggaucuuug                   | 16    | 1 | seq |
| .cucguaguuggUucuuug                   | 2     | 1 | seq |
| .cucguaAuggaucuuug                    | 6     | 1 | seq |
| .cucguaguuggauUuuug                   | 5     | 1 | seq |
| .cucguaguuggGucuuug                   | 45    | 1 | seq |
| .cucguaguugCaucuuug                   | 1     | 1 | seq |
| .cucguaguuuUgaucuuug                  | 2     | 1 | seq |
| .cucguaguugUaucuuug                   | 5     | 1 | seq |
| .cucguaguuggaucuUg                    | 38    | 1 | seq |
| .cucguaguuggaucuuC                    | 15    | 1 | seq |
| .cucguaguuggaucuCg                    | 56    | 1 | seq |
| .cucguaguUggaucuuug                   | 6     | 1 | seq |
| .cucUuaguuggaucuuug                   | 6     | 1 | seq |
| .cucCuaguuggaucuuug                   | 1     | 1 | seq |
| .cucguaguuggaucuuug                   | 12100 | 0 | seq |
| .cucgAuguuggaucuuug                   | 2     | 1 | seq |
| .cucguaCuuggaucuuug                   | 2     | 1 | seq |
| .cucguaguuggaucuuUg                   | 4     | 1 | seq |
| .cucguaguuggaCcuugg                   | 12    | 1 | seq |
| .cucgGaguuggaucuugg                   | 1     | 1 | seq |
| .cucguaguugUaucuugg                   | 2     | 1 | seq |
| .cucUuaguuggaucuugg                   | 1     | 1 | seq |
| .cucguaguUggaucuugg                   | 1     | 1 | seq |
| .cucguaguuggaAuguug                   | 2     | 1 | seq |
| .cucguaguCggaucuugg                   | 14    | 1 | seq |
| .Gucguaguuggaucuugg                   | 10    | 1 | seq |
| .cucguaguuggaucuAugg                  | 4     | 1 | seq |
| .cAuguaguuggaucuugg                   | 4     | 1 | seq |
| .cucguaguuggaucAugg                   | 6     | 1 | seq |
| .Nucguaguuggaucuugg                   | 5     | 1 | seq |
| .cucguaguuggauUuuugg                  | 5     | 1 | seq |
| .cucguaAuggaucuuugg                   | 1     | 1 | seq |



Star

|                                                                           |      |   |     |
|---------------------------------------------------------------------------|------|---|-----|
| uaaguuuguaguuaaaaaaacucguaguuggaucuuugggucacuaaaaggucggucugccuacucggugugc |      |   |     |
| . . . . . cucguaguuggaucuuU . . . . .                                     | 35   | 1 | seq |
| . . . . . cucguaguuggaucCugg . . . . .                                    | 9    | 1 | seq |
| . . . . . cucguaguuggGuccuugg . . . . .                                   | 24   | 1 | seq |
| . . . . . cucguaguuggaucuuugg . . . . .                                   | 4832 | 0 | seq |
| . . . . . cucguaguuggaucuCggg . . . . .                                   | 12   | 1 | seq |
| . . . . . cucguagAuggaucuuugg . . . . .                                   | 1    | 1 | seq |
| . . . . . cucguaguuggaucCugg . . . . .                                    | 1    | 1 | seq |
| . . . . . cucguaguuggaucuuCg . . . . .                                    | 1    | 1 | seq |
| . . . . . cuGguaguuggaucuuugg . . . . .                                   | 4    | 1 | seq |
| . . . . . cucguaguuggUuccuugg . . . . .                                   | 1    | 1 | seq |
| . . . . . cucguGguuggaucuuugg . . . . .                                   | 8    | 1 | seq |
| . . . . . cucguaguuggaucuCgg . . . . .                                    | 14   | 1 | seq |
| . . . . . cucguagAuaggaucuuugg . . . . .                                  | 3    | 1 | seq |
| . . . . . cucguaguuggaGcuugg . . . . .                                    | 3    | 1 | seq |
| . . . . . cucguagCuggaucuuugg . . . . .                                   | 7    | 1 | seq |
| . . . . . cucguUguuggaucuuugg . . . . .                                   | 1    | 1 | seq |
| . . . . . cucguaguuggaucuuCg . . . . .                                    | 32   | 1 | seq |
| . . . . . cuAguauguuggaucuuugg . . . . .                                  | 2    | 1 | seq |
| . . . . . cucguaguUgaucuuugg . . . . .                                    | 1    | 1 | seq |
| . . . . . cucguaguuggaucuuCg . . . . .                                    | 12   | 1 | seq |
| . . . . . cucguaguCggaucuuuggg . . . . .                                  | 20   | 1 | seq |
| . . . . . Nucguaguuggaucuuuggg . . . . .                                  | 10   | 1 | seq |
| . . . . . cucCuaguuggaucuuuggg . . . . .                                  | 1    | 1 | seq |
| . . . . . cGcguauguuggaucuuuggg . . . . .                                 | 1    | 1 | seq |
| . . . . . cucguaguuggGuccuuggg . . . . .                                  | 13   | 1 | seq |
| . . . . . cucguaguuggaucuCggg . . . . .                                   | 4    | 1 | seq |
| . . . . . cucguaguAaggauuuuggg . . . . .                                  | 1    | 1 | seq |
| . . . . . cucguaguuggaAcuuuggg . . . . .                                  | 1    | 1 | seq |
| . . . . . cAcguauguuggaucuuuggg . . . . .                                 | 1    | 1 | seq |
| . . . . . cucguaguugUaucuuuggg . . . . .                                  | 1    | 1 | seq |
| . . . . . cucguaguuggaucuuCg . . . . .                                    | 11   | 1 | seq |
| . . . . . cucguaguuggaGcuuggg . . . . .                                   | 2    | 1 | seq |
| . . . . . cucguagGuuggaucuuuggg . . . . .                                 | 1    | 1 | seq |
| . . . . . cucguaguGggaucuuuggg . . . . .                                  | 2    | 1 | seq |
| . . . . . cucguaguuggaCcuuggg . . . . .                                   | 17   | 1 | seq |
| . . . . . cuGguaguuggaucuuuggg . . . . .                                  | 2    | 1 | seq |
| . . . . . cucguaguuggaUuuuggg . . . . .                                   | 1    | 1 | seq |
| . . . . . GuCGuauguuggaucuuuggg . . . . .                                 | 4    | 1 | seq |
| . . . . . cucguGguuggaucuuuggg . . . . .                                  | 13   | 1 | seq |
| . . . . . cucguagCuggaucuuuggg . . . . .                                  | 6    | 1 | seq |
| . . . . . cucguaguuggaucuuCgg . . . . .                                   | 3    | 1 | seq |
| . . . . . cucguaguuggaucuCggg . . . . .                                   | 11   | 1 | seq |
| . . . . . cucguaguuggaucuuCg . . . . .                                    | 42   | 1 | seq |
| . . . . . cucguagAuggaucuuuggg . . . . .                                  | 1    | 1 | seq |
| . . . . . cucguaguuggaucCuggg . . . . .                                   | 15   | 1 | seq |
| . . . . . cucguaguuggUuccuugg . . . . .                                   | 1    | 1 | seq |
| . . . . . cucguAAuuggaucuuuggg . . . . .                                  | 1    | 1 | seq |
| . . . . . cucguaguuggaucuuUgg . . . . .                                   | 3    | 1 | seq |
| . . . . . cucguaguuggaucGuggg . . . . .                                   | 1    | 1 | seq |
| . . . . . cucgGaguuggaucuuuggg . . . . .                                  | 4    | 1 | seq |
| . . . . . cucguaguuggaucAuggg . . . . .                                   | 2    | 1 | seq |
| . . . . . cucguaguuggaucuuuggU . . . . .                                  | 62   | 1 | seq |
| . . . . . cucguaguuggaucuuuggg . . . . .                                  | 5323 | 0 | seq |
| . . . . . cucUuaguuggaucuuuggg . . . . .                                  | 4    | 1 | seq |
| . . . . . cucguaguugAucuuggg . . . . .                                    | 3    | 1 | seq |
| . . . . . cucguaguuggaucuuAgg . . . . .                                   | 11   | 1 | seq |
| . . . . . cucguaguuggaucAuggg . . . . .                                   | 1    | 1 | seq |
| . . . . . cuAguauguuggaucuuuggg . . . . .                                 | 3    | 1 | seq |
| . . . . . cucguaguuggaucuuugggC . . . . .                                 | 573  | 1 | seq |
| . . . . . cucguaguuggauUuuugggu . . . . .                                 | 2    | 1 | seq |
| . . . . . cucCuaguuggaucuuugggu . . . . .                                 | 1    | 1 | seq |
| . . . . . cucguaguuggaucCugggu . . . . .                                  | 4    | 1 | seq |
| . . . . . cucguaguuggaucGuugggu . . . . .                                 | 1    | 1 | seq |
| . . . . . cucguaguuggaucuuugggG . . . . .                                 | 138  | 1 | seq |
| . . . . . cucguaguCggaucuuugggu . . . . .                                 | 10   | 1 | seq |
| . . . . . cucUuaguuggaucuuugggu . . . . .                                 | 4    | 1 | seq |
| . . . . . cucguagGuuggaucuuugggu . . . . .                                | 1    | 1 | seq |
| . . . . . cucguagAuggaucuuugggu . . . . .                                 | 1    | 1 | seq |
| . . . . . cAcguauguuggaucuuugggu . . . . .                                | 5    | 1 | seq |
| . . . . . cucguaguuggaucuuAggu . . . . .                                  | 1    | 1 | seq |

## Mature

## Star

uaaguuguuguaguuaaaaaacucguaguuggaucuugggucuaaaaggucggucugccuacucggugugc

|                                    |      |   |     |
|------------------------------------|------|---|-----|
| .....cucguaguugAaucuugggu.....     | 3    | 1 | seq |
| .....cucguaguugGgaucuuugggu.....   | 2    | 1 | seq |
| .....cucguaguugCaucuuugggu.....    | 1    | 1 | seq |
| .....Gucguaguuggaucuugggu.....     | 3    | 1 | seq |
| .....cuGguaguuggaucuugggu.....     | 2    | 1 | seq |
| .....cucguaguuggaucuAgggu.....     | 3    | 1 | seq |
| .....cucguaguuggaucuugUgu.....     | 2    | 1 | seq |
| .....cucguaguuggaucuuUggu.....     | 1    | 1 | seq |
| .....cucguaguuggaucuugggu.....     | 3519 | 0 | seq |
| .....cucguaguuggaucuugggA.....     | 75   | 1 | seq |
| .....cucguaguAgggaucuuugggu.....   | 2    | 1 | seq |
| .....cucguauuuggaucuugggu.....     | 4    | 1 | seq |
| .....Nucguaguuggaucuugggu.....     | 6    | 1 | seq |
| .....cucguaguuggGuuuugggu.....     | 5    | 1 | seq |
| .....cucguaguuggCucuuugggu.....    | 1    | 1 | seq |
| .....cucguaguuggaucuGgggu.....     | 2    | 1 | seq |
| .....cucguagCuggaucuugggu.....     | 2    | 1 | seq |
| .....cucguaguuggaucuuggCu.....     | 4    | 1 | seq |
| .....cucguaguuggaucuGgggu.....     | 9    | 1 | seq |
| .....cucguCguuggaucuugggu.....     | 1    | 1 | seq |
| .....cucguaguuuUgaucuuugggu.....   | 2    | 1 | seq |
| .....cucguaguuggaGcuugggu.....     | 1    | 1 | seq |
| .....cucguGguuggaucuugggu.....     | 11   | 1 | seq |
| .....cucguaguuggaCcuugggu.....     | 7    | 1 | seq |
| .....Nucguaguuggaucuuggguc.....    | 1    | 1 | seq |
| .....cucguaguuggaucuugggCc.....    | 16   | 1 | seq |
| .....cucguaguugAaucuuggguc.....    | 1    | 1 | seq |
| .....cAguaguuggaucuuggguc.....     | 2    | 1 | seq |
| .....cucguaguuggauUuuggguc.....    | 2    | 1 | seq |
| .....cucguaguuggaucuAggguc.....    | 2    | 1 | seq |
| .....cucguaguuggCucuuuggguc.....   | 1    | 1 | seq |
| .....cucguaguuggaucuuggguc.....    | 754  | 0 | seq |
| .....cucguUguuggaucuuggguc.....    | 1    | 1 | seq |
| .....Uucguaguuggaucuuggguc.....    | 4    | 1 | seq |
| .....cucGaguuggaucuuggguc.....     | 1    | 1 | seq |
| .....cucguaguuggaucuGggguc.....    | 3    | 1 | seq |
| .....cucguauuuggaucuuggguc.....    | 1    | 1 | seq |
| .....cucguaguuggaucuuAgguc.....    | 1    | 1 | seq |
| .....cucguGguuggaucuuggguc.....    | 1    | 1 | seq |
| .....cucguaguuggaCcuuggguc.....    | 6    | 1 | seq |
| .....cucguaguuggaucuuggguG.....    | 9    | 1 | seq |
| .....cucguaguuggaucuugggGc.....    | 4    | 1 | seq |
| .....cucguaguuggaucuuggUuc.....    | 7    | 1 | seq |
| .....cucguagGuggaucuuggguc.....    | 1    | 1 | seq |
| .....cucguaguuggaucuGggguc.....    | 1    | 1 | seq |
| .....cucguaguuggGuuuuggguc.....    | 2    | 1 | seq |
| .....cucguaguuggaucuAggguc.....    | 1    | 1 | seq |
| .....cucguaguuuAgaucuuggguc.....   | 1    | 1 | seq |
| .....cucguagCuggaucuuggguc.....    | 1    | 1 | seq |
| .....cucguaguuggaucuuggguca.....   | 554  | 0 | seq |
| .....cucguaguuggaucuuggAuca.....   | 1    | 1 | seq |
| .....cucguaguuggaucuugggGca.....   | 5    | 1 | seq |
| .....cucguaguuggaucuugAguca.....   | 1    | 1 | seq |
| .....cucguaguGggaucuuggguca.....   | 1    | 1 | seq |
| .....cucguagAuggaucuuuggguca.....  | 1    | 1 | seq |
| .....cucUuaguuggaucuuggguca.....   | 1    | 1 | seq |
| .....cucguCguuggaucuuggguca.....   | 1    | 1 | seq |
| .....cucguaguuuUgaucuuuggguca..... | 1    | 1 | seq |
| .....cucguaguuggaucuuggguUa.....   | 1    | 1 | seq |
| .....cucguaguuggaCcuuggguca.....   | 4    | 1 | seq |
| .....Gucguaguuggaucuuggguca.....   | 2    | 1 | seq |
| .....cucguaguuggaucuuggguuC.....   | 50   | 1 | seq |
| .....cucguaguAggaucuuuggguca.....  | 1    | 1 | seq |
| .....cucguUguuggaucuuggguca.....   | 1    | 1 | seq |
| .....cucguaguuuAgaucuuggguca.....  | 1    | 1 | seq |
| .....cucguaguCggaucuuggguca.....   | 2    | 1 | seq |
| .....cucguaguuggaucuuggguca.....   | 1    | 1 | seq |
| .....cucguaguuggaucuuggguU.....    | 102  | 1 | seq |
| .....cucguGguuggaucuuggguca.....   | 1    | 1 | seq |
| .....cucguaguuggGuuuuggguca.....   | 2    | 1 | seq |

## Mature

## Star

uaaguuguuguaguuaaaaaacucguaguuggaucuugggucauaaaggucggucugccuacucggugugc

|                                            |      |   |     |
|--------------------------------------------|------|---|-----|
| .....cucguaguuggaucuugggAca.....           | 1    | 1 | seq |
| .....cucguaguuggaucuugggCca.....           | 5    | 1 | seq |
| .....cuGguaguuggaucuugggucA.....           | 1    | 1 | seq |
| .....cucguaguuggaucuugggucUu.....          | 1    | 1 | seq |
| .....cucguaguuggaucuugggCcau.....          | 1    | 1 | seq |
| .....cucguaguuggaucuugggucAG.....          | 3    | 1 | seq |
| .....cucguaguuggaucuugggucAu.....          | 14   | 0 | seq |
| .....cucguaguuggaucuugggucCu.....          | 4    | 1 | seq |
| .....cucguaguuggaucuugggucAua.....         | 6    | 0 | seq |
| .....cucguaguuggaCcuugggucAua.....         | 1    | 1 | seq |
| .....cucguaguuggaucuugggucCua.....         | 1    | 1 | seq |
| .....cucguaguuggaucuCgggucAua.....         | 1    | 1 | seq |
| .....cucguaguuggaucuugggucUua.....         | 4    | 1 | seq |
| .....cucguaguuggaucuugggucAuaa.....        | 3    | 0 | seq |
| .....cucguaguuggaucuugggucUuaaagg.....     | 1    | 1 | seq |
| .....cucguaguuggaucuugggucAuaaaggucgg..... | 1    | 0 | seq |
| .....ucgAaguuggaucuugg.....                | 1    | 1 | seq |
| .....ucguGguuggaucuugg.....                | 7    | 1 | seq |
| .....ucguaguuggaucuuCg.....                | 2    | 1 | seq |
| .....ucguaguuggaucuugU.....                | 19   | 1 | seq |
| .....Acguaguuggaucuugg.....                | 3    | 1 | seq |
| .....ucguaguuggaucCugg.....                | 8    | 1 | seq |
| .....Gcguaguuggaucuugg.....                | 3    | 1 | seq |
| .....ucUaguuggaucuugg.....                 | 1    | 1 | seq |
| .....ucguaguuggaucuugg.....                | 2413 | 0 | seq |
| .....Ncguaguuggaucuugg.....                | 2    | 1 | seq |
| .....ucguaguuggauUuugg.....                | 1    | 1 | seq |
| .....ucguaguuggaucAugg.....                | 1    | 1 | seq |
| .....ucguaguugUaucuugg.....                | 1    | 1 | seq |
| .....ucguaguuggaucuCgg.....                | 4    | 1 | seq |
| .....ucguaguuggaucuuUg.....                | 2    | 1 | seq |
| .....ucguCguuggaucuugg.....                | 2    | 1 | seq |
| .....ucguaguuggaucuGgg.....                | 3    | 1 | seq |
| .....ucguaguuggaCcuugg.....                | 3    | 1 | seq |
| .....ucguaguAgggaucuugg.....               | 1    | 1 | seq |
| .....ucguagCugggaucuugg.....               | 1    | 1 | seq |
| .....ucguaguCgggaucuugg.....               | 4    | 1 | seq |
| .....ucgAaguuggaucuuggg.....               | 1    | 1 | seq |
| .....ucguaguugAaucuuggg.....               | 1    | 1 | seq |
| .....ucguGguuggaucuuggg.....               | 1    | 1 | seq |
| .....ucguaguuggaucuugUg.....               | 1    | 1 | seq |
| .....ucguaguuggauUuuggg.....               | 1    | 1 | seq |
| .....ucguaguuggaucGuggg.....               | 1    | 1 | seq |
| .....ucguaguuggaucuuUgg.....               | 1    | 1 | seq |
| .....ucguaguuggauGuuggg.....               | 1    | 1 | seq |
| .....ucguaguuggaucuGggg.....               | 1    | 1 | seq |
| .....ucguagCugggaucuuggg.....              | 2    | 1 | seq |
| .....ucguaguuggaucuCggg.....               | 3    | 1 | seq |
| .....ucguCguuggaucuuggg.....               | 1    | 1 | seq |
| .....ucguaguuggaucuuggC.....               | 14   | 1 | seq |
| .....uGguaguuggaucuuggg.....               | 1    | 1 | seq |
| .....ucUaguuggaucuuggg.....                | 1    | 1 | seq |
| .....Acguaguuggaucuuggg.....               | 1    | 1 | seq |
| .....ucguaguCgggaucuuggg.....              | 1    | 1 | seq |
| .....ucguaguuggaucuAaggg.....              | 1    | 1 | seq |
| .....ucguaguuggUucuuuggg.....              | 1    | 1 | seq |
| .....Ncguaguuggaucuuggg.....               | 1    | 1 | seq |
| .....ucguaguuggaucuuggU.....               | 13   | 1 | seq |
| .....ucguaAuuggaucuuggg.....               | 2    | 1 | seq |
| .....ucguaguUgaucuuggg.....                | 1    | 1 | seq |
| .....ucguaguuggaCcuuggg.....               | 2    | 1 | seq |
| .....ucguaguugUaucuuggg.....               | 1    | 1 | seq |
| .....ucguaguuggaucuuggg.....               | 1032 | 0 | seq |
| .....Gcguaguuggaucuuggg.....               | 1    | 1 | seq |
| .....ucguaguuggaucCuggg.....               | 3    | 1 | seq |
| .....ucguaguuggaucuCgggu.....              | 3    | 1 | seq |
| .....ucguaguuggaucuugggG.....              | 19   | 1 | seq |
| .....ucguagGuggaucuugggu.....              | 1    | 1 | seq |
| .....ucguaguuggaCcuugggu.....              | 1    | 1 | seq |
| .....ucguaguuggauGuugggu.....              | 1    | 1 | seq |

## Mature

## Star

uaaguuguuguaguuaaaaaacucguaguuggaucuugggucauaaaggucggucugccuacucggugugc

|                                             |      |   |     |
|---------------------------------------------|------|---|-----|
| .....ucguaguugAaauuugggu.....               | 1    | 1 | seq |
| .....ucguaguuggaucuugggA.....               | 26   | 1 | seq |
| .....ucguaguuggauUuugggu.....               | 1    | 1 | seq |
| .....ucguaguuggaucGugggu.....               | 1    | 1 | seq |
| .....ucguaguugUaauuugggu.....               | 1    | 1 | seq |
| .....Gcguaguuggaucuugggu.....               | 1    | 1 | seq |
| .....ucguaguuggCcuuugggu.....               | 1    | 1 | seq |
| .....ucguGguuggaucuugggu.....               | 3    | 1 | seq |
| .....ucguaguuggaucCugggu.....               | 1    | 1 | seq |
| .....ucguaguCggaucuugggu.....               | 1    | 1 | seq |
| .....ucguaguUgaucuugggu.....                | 1    | 1 | seq |
| .....uGguaguuggaucuugggu.....               | 1    | 1 | seq |
| .....ucgGguuggaucuugggu.....                | 1    | 1 | seq |
| .....ucguaguuggaucuugggu.....               | 900  | 0 | seq |
| .....ucguaguuggaucuuggCu.....               | 2    | 1 | seq |
| .....ucguGguuggaucuuggguc.....              | 3    | 1 | seq |
| .....ucguaguuggaucuuggguG.....              | 2    | 1 | seq |
| .....ucguaguuggaucuugggGc.....              | 3    | 1 | seq |
| .....ucguaguuggaucuuAgguc.....              | 1    | 1 | seq |
| .....ucguaguuggaucuuggUuc.....              | 2    | 1 | seq |
| .....ucguaguuggaucCuggguc.....              | 4    | 1 | seq |
| .....ucguaguCggaucuuggguc.....              | 2    | 1 | seq |
| .....ucguaguuggaCcuuggguc.....              | 1    | 1 | seq |
| .....ucguaguuggaucuuggguc.....              | 668  | 0 | seq |
| .....ucguaguuggaucuugggCc.....              | 12   | 1 | seq |
| .....ucguaguugUaauuuggguc.....              | 2    | 1 | seq |
| .....ucguaguuggaucuugUguc.....              | 1    | 1 | seq |
| .....ucguaguAggaucuuggguc.....              | 1    | 1 | seq |
| .....ucguaguuggaucuuggguca.....             | 244  | 0 | seq |
| .....ucguaguuggaucuuggguUa.....             | 1    | 1 | seq |
| .....ucguaguugAaauuuggguca.....             | 1    | 1 | seq |
| .....uUguaguuggaucuuggguca.....             | 1    | 1 | seq |
| .....ucguaguCggaucuuggguca.....             | 1    | 1 | seq |
| .....ucguaguuggaucuugggucU.....             | 67   | 1 | seq |
| .....ucguagCuggaucuuggguca.....             | 1    | 1 | seq |
| .....ucguaguuggaucuugggucC.....             | 33   | 1 | seq |
| .....ucguaguuggaucuugggGca.....             | 1    | 1 | seq |
| .....ucguaguuggaucuugggucaA.....            | 1    | 1 | seq |
| .....ucguaguuggaucuugggucaC.....            | 3    | 1 | seq |
| .....ucguaguuggaucuugggucCu.....            | 1    | 1 | seq |
| .....ucguaguuggaucuugggucau.....            | 5    | 0 | seq |
| .....ucguaguuggaucuuUgggucau.....           | 1    | 1 | seq |
| .....ucguaguuggaucuugggucaua.....           | 2    | 0 | seq |
| .....ucguaguuggaucuugggucauaaag.....        | 1    | 0 | seq |
| .....ucguaguuggaucuugggucauaaagguc.....     | 1    | 0 | seq |
| .....ucguaguuggaucuugggucauaaaggucgg.....   | 1    | 0 | seq |
| .....ucguaguuggaucuugggucauaaaggucggu.....  | 1    | 0 | seq |
| .....ucguaguuggaucuugggucauaaaggucgguc..... | 1    | 0 | seq |
| .....cguUguuggaucuuggg.....                 | 2    | 1 | seq |
| .....cguaguuggauUuuggg.....                 | 1    | 1 | seq |
| .....cguGguuggaucuuggg.....                 | 2    | 1 | seq |
| .....cguaguuggaucuugUg.....                 | 2    | 1 | seq |
| .....cguaguuggaucuCggg.....                 | 2    | 1 | seq |
| .....cUuaguuggaucuuggg.....                 | 3    | 1 | seq |
| .....cguAauuggaucuuggg.....                 | 1    | 1 | seq |
| .....cguaguugAaauuuggg.....                 | 2    | 1 | seq |
| .....cguaguuggaucuuAgg.....                 | 1    | 1 | seq |
| .....cguaguuggaucuGggg.....                 | 2    | 1 | seq |
| .....cguaguCggaucuuggg.....                 | 3    | 1 | seq |
| .....cguaguuggaucuuggC.....                 | 10   | 1 | seq |
| .....cguaguuggaucuuUgg.....                 | 1    | 1 | seq |
| .....cguaguuggaucAuggg.....                 | 1    | 1 | seq |
| .....cguagCuggaucuuggg.....                 | 3    | 1 | seq |
| .....cguaguAggaucuuggg.....                 | 2    | 1 | seq |
| .....cguaguuggaucuuggg.....                 | 1077 | 0 | seq |
| .....Gguaguuggaucuuggg.....                 | 1    | 1 | seq |
| .....cgAguuggaucuuggg.....                  | 1    | 1 | seq |
| .....cguaguuggaucuuggU.....                 | 13   | 1 | seq |
| .....cguaguuggaucCuggg.....                 | 6    | 1 | seq |
| .....cguagCuggaucuugggu.....                | 2    | 1 | seq |

## Mature

## Star

uaaguuguuguaguuaaaaaacucguaguuggaucuugggucauaaaggucggucugccuacucggugugc

|                                               |      |   |     |
|-----------------------------------------------|------|---|-----|
| .....cguaguGggaucuugggu.....                  | 1    | 1 | seq |
| .....cguaguAgggaucuugggu.....                 | 1    | 1 | seq |
| .....cguaguugggauPuugggu.....                 | 1    | 1 | seq |
| .....cguaguugggaucuuugggA.....                | 40   | 1 | seq |
| .....cguGguugggaucuuugggu.....                | 2    | 1 | seq |
| .....cguaguCgggaucuuugggu.....                | 6    | 1 | seq |
| .....cguaguugggaucAugggu.....                 | 2    | 1 | seq |
| .....Gguaguugggaucuuugggu.....                | 2    | 1 | seq |
| .....cPuaguugggaucuuugggu.....                | 3    | 1 | seq |
| .....cguaguugggaCcuugggu.....                 | 4    | 1 | seq |
| .....cguaguugCaucuuugggu.....                 | 1    | 1 | seq |
| .....cguaguugggaucGugggu.....                 | 1    | 1 | seq |
| .....cguaguugggaucuuugggu.....                | 1613 | 0 | seq |
| .....cguaguugggaucCugggu.....                 | 1    | 1 | seq |
| .....cgAguugggaucuuugggu.....                 | 1    | 1 | seq |
| .....cguaguugggaucuuuggG.....                 | 61   | 1 | seq |
| .....cguaguugggaucAugggu.....                 | 1    | 1 | seq |
| .....cguaguuuPgauucuuugggu.....               | 1    | 1 | seq |
| .....cguaguugggaucuuuggCu.....                | 5    | 1 | seq |
| .....cguCguugggaucuuugggu.....                | 1    | 1 | seq |
| .....cguaguugggaucuCugggu.....                | 6    | 1 | seq |
| .....cguaguugggaucuuuggPu.....                | 1    | 1 | seq |
| .....cPuaguugggaucuuugggu.....                | 2    | 1 | seq |
| .....cguPuugggaucuuugggu.....                 | 1    | 1 | seq |
| .....cguaguugggaucuuuggGc.....                | 2    | 1 | seq |
| .....cguaguuuAgauucuuugggu.....               | 1    | 1 | seq |
| .....cguaguugggaucuuuggguG.....               | 4    | 1 | seq |
| .....cguaguugggaCcuugggu.....                 | 1    | 1 | seq |
| .....Nguaguugggaucuuugggu.....                | 1    | 1 | seq |
| .....cguaguugggaucCugggu.....                 | 1    | 1 | seq |
| .....cguaguugggaucuuugggu.....                | 343  | 0 | seq |
| .....cguaguugAaucuuugggu.....                 | 2    | 1 | seq |
| .....cguaguugggaucuCugggu.....                | 1    | 1 | seq |
| .....cguaguugggaucuuuggGc.....                | 7    | 1 | seq |
| .....cguaguugggaucuuuggGCa.....               | 11   | 1 | seq |
| .....cguaguugggaucuuuggguCa.....              | 369  | 0 | seq |
| .....cguaguugggaucuuuggGCa.....               | 4    | 1 | seq |
| .....cguaguugggaucuuuggguGa.....              | 1    | 1 | seq |
| .....cguaguugggaucuuuAgguCa.....              | 2    | 1 | seq |
| .....cguaguugggaucuuuggguPu.....              | 77   | 1 | seq |
| .....cguaguugggaucuuugAgua.....               | 1    | 1 | seq |
| .....cguaguCgggaucuuuggguCa.....              | 1    | 1 | seq |
| .....cguGguugggaucuuuggguCa.....              | 1    | 1 | seq |
| .....cguaguuggGcuuuggguCa.....                | 1    | 1 | seq |
| .....cguaguuuAgauucuuuggguCa.....             | 1    | 1 | seq |
| .....cguaguugggauPuuggguCa.....               | 1    | 1 | seq |
| .....cguaguugggaucGggguCa.....                | 1    | 1 | seq |
| .....PuaguugggaucuuuggguCa.....               | 1    | 1 | seq |
| .....cguaguugggaucuuuggguCC.....              | 45   | 1 | seq |
| .....cguaguugUaucuuuggguCa.....               | 1    | 1 | seq |
| .....cguaguugggaCcuuggguCa.....               | 1    | 1 | seq |
| .....cguaguugggaucCuggguCa.....               | 1    | 1 | seq |
| .....cguaguugggaucuuuggguPu.....              | 4    | 1 | seq |
| .....cguaguugggaucuuugggucau.....             | 6    | 0 | seq |
| .....cguaguugggaucuuugggucaA.....             | 1    | 1 | seq |
| .....cguaguugggaucuuuggguCCu.....             | 4    | 1 | seq |
| .....cguaguugggaucuuugggucaua.....            | 4    | 0 | seq |
| .....cguaguugggaucuuuggguPuua.....            | 1    | 1 | seq |
| .....cguaguugggaucuuuggguCCua.....            | 2    | 1 | seq |
| .....cguaguugggaucuuugggucauaa.....           | 2    | 0 | seq |
| .....cguaguugggaucuuuggguPuuaagg.....         | 1    | 1 | seq |
| .....cguaguugggaucuuugggucauaaagg.....        | 1    | 0 | seq |
| .....cguaguugggaucuuugggucauaaaggucg.....     | 1    | 0 | seq |
| .....cguaguugggaucuuugggucauaaaggucggC.....   | 1    | 1 | seq |
| .....cguaguugggaucuuugggucauaaaggucggg.....   | 1    | 0 | seq |
| .....cguaguugggaucuuuggguCCuaaaggucggucu..... | 1    | 1 | seq |
| .....guaguugggaucuuuggPu.....                 | 2    | 1 | seq |
| .....guaguugggaucAugggu.....                  | 1    | 1 | seq |

## Mature

## Star

uaaguuguuguaguuaaaaaaacucguaguuggaucuugggucauaaaggucggucugccuacucggugugc

|                                        |      |   |     |
|----------------------------------------|------|---|-----|
| .....guaguAggaucuuugggu.....           | 1    | 1 | seq |
| .....guaguuggaucuugggA.....            | 16   | 1 | seq |
| .....guaguuggaucuuggCu.....            | 3    | 1 | seq |
| .....guagCuggaucuugggu.....            | 2    | 1 | seq |
| .....guaguGggaucuugggu.....            | 1    | 1 | seq |
| .....guaguugAaucuugggu.....            | 2    | 1 | seq |
| .....guaguuggaucuCgggu.....            | 4    | 1 | seq |
| .....guaguuggaucuugggG.....            | 30   | 1 | seq |
| .....Uuaguuggaucuugggu.....            | 1    | 1 | seq |
| .....guaguCggaucuugggu.....            | 3    | 1 | seq |
| .....guaguuggauUuugggu.....            | 1    | 1 | seq |
| .....guaguuggaucCugggu.....            | 1    | 1 | seq |
| .....Nuaguuggaucuugggu.....            | 2    | 1 | seq |
| .....Cuaguuggaucuugggu.....            | 1    | 1 | seq |
| .....guaguuggaucuuAggu.....            | 3    | 1 | seq |
| .....guaguuggaucuugggu.....            | 879  | 0 | seq |
| .....guaguuggaucuugggGc.....           | 12   | 1 | seq |
| .....guaguuggaucuugggCc.....           | 23   | 1 | seq |
| .....guaguuggaucAuggguc.....           | 1    | 1 | seq |
| .....guaguuggaucuuggguc.....           | 1505 | 0 | seq |
| .....guUguuggaucuuggguc.....           | 2    | 1 | seq |
| .....guaguuggUucuuuggguc.....          | 1    | 1 | seq |
| .....guaguuggaCcuuggguc.....           | 6    | 1 | seq |
| .....guaguuggaucCuggguc.....           | 2    | 1 | seq |
| .....guaguuggaucuuggguG.....           | 8    | 1 | seq |
| .....guaguuggaucuGggguc.....           | 1    | 1 | seq |
| .....guagCuggaucuuggguc.....           | 1    | 1 | seq |
| .....guaguuggaucuuCgguc.....           | 1    | 1 | seq |
| .....gGaguuggaucuuggguc.....           | 1    | 1 | seq |
| .....Nuaguuggaucuuggguc.....           | 1    | 1 | seq |
| .....guaguuCgaucuuuggguc.....          | 1    | 1 | seq |
| .....guaguUgaucuuggguc.....            | 2    | 1 | seq |
| .....guaguCggaucuuggguc.....           | 1    | 1 | seq |
| .....guaguuggaucuuggCuc.....           | 1    | 1 | seq |
| .....guaguuggaucuuggUuc.....           | 1    | 1 | seq |
| .....guaguUAgaucuuggguc.....           | 1    | 1 | seq |
| .....guaAuuggaucuuggguc.....           | 1    | 1 | seq |
| .....Uuaguuggaucuuggguca.....          | 1    | 1 | seq |
| .....guaguuggaucuugggCca.....          | 2    | 1 | seq |
| .....guaguuggaucuuggguca.....          | 187  | 0 | seq |
| .....guaguuggaucuugggucU.....          | 54   | 1 | seq |
| .....guaguuggaCcuuggguca.....          | 2    | 1 | seq |
| .....guaguuggaucuugggGca.....          | 1    | 1 | seq |
| .....guaguuggGucuuuggguca.....         | 1    | 1 | seq |
| .....guaguuggaucuugggucC.....          | 26   | 1 | seq |
| .....guaguuggaucuugggucUu.....         | 2    | 1 | seq |
| .....guaguuggaucuugggucCu.....         | 1    | 1 | seq |
| .....guaguuggaucuugggucaG.....         | 2    | 1 | seq |
| .....guaguuggaucuugggucau.....         | 4    | 0 | seq |
| .....guaguuggaucuugggucCua.....        | 2    | 1 | seq |
| .....guaguuggaucuugggucauG.....        | 1    | 1 | seq |
| .....guaguuggaucuugggucUua.....        | 1    | 1 | seq |
| .....guaguuggaucuugggucaua.....        | 2    | 0 | seq |
| .....guaguuggaucuugggucauaaagg.....    | 1    | 0 | seq |
| .....guaguuggaucuugggucauaaaggC.....   | 1    | 1 | seq |
| .....guaguuggaucuugggucauaaaggG.....   | 2    | 0 | seq |
| .....guaguuggaucuugggucUuaaaggucg..... | 1    | 1 | seq |
| .....uaguuggaCcuuggguc.....            | 2    | 1 | seq |
| .....uaguuggaucuCggguc.....            | 5    | 1 | seq |
| .....uagCuggaucuuggguc.....            | 3    | 1 | seq |
| .....uaguugAaucuuggguc.....            | 1    | 1 | seq |
| .....uaAuuggaucuuggguc.....            | 1    | 1 | seq |
| .....uagAuggaucuuuggguc.....           | 2    | 1 | seq |
| .....uaguuAgaucuuggguc.....            | 4    | 1 | seq |
| .....uaguuggaucuuggguc.....            | 2008 | 0 | seq |
| .....uaguAggaucuuuggguc.....           | 1    | 1 | seq |
| .....uaguugCaucuuuggguc.....           | 1    | 1 | seq |
| .....uaguuggaucuAggguc.....            | 1    | 1 | seq |
| .....uaguuggauUuuggguc.....            | 1    | 1 | seq |
| .....uaguuggaucCuggguc.....            | 2    | 1 | seq |

## Mature

## Star

uaaguuguuguaguuaaaaaaacucguaguggaucucugggucuaaaaggucggucugccuacucggugugc

|                                           |     |   |     |
|-------------------------------------------|-----|---|-----|
| .....uaguuggaucuuggCuc.....               | 2   | 1 | seq |
| .....uaguuggaucuugUguc.....               | 2   | 1 | seq |
| .....uaguCgggaucucuggguc.....             | 4   | 1 | seq |
| .....uaguuggaucucugggCc.....              | 29  | 1 | seq |
| .....uaguuggauGuuggguc.....               | 1   | 1 | seq |
| .....uaguuggaucucugggGc.....              | 9   | 1 | seq |
| .....uaguuggaucuuggUuc.....               | 3   | 1 | seq |
| .....uaguuggaucuuAgguc.....               | 1   | 1 | seq |
| .....uaCuuggaucucuggguc.....              | 1   | 1 | seq |
| .....Gaguuggaucucuggguc.....              | 5   | 1 | seq |
| .....uaguuggaucuGggguc.....               | 1   | 1 | seq |
| .....uaguuggaucucuggguG.....              | 9   | 1 | seq |
| .....Aaguuggaucucuggguc.....              | 1   | 1 | seq |
| .....uaguuggaucucugggAc.....              | 2   | 1 | seq |
| .....Naguuggaucucuggguc.....              | 3   | 1 | seq |
| .....uaguuggaucucugggCca.....             | 7   | 1 | seq |
| .....uaguuggaucucuggguUa.....             | 3   | 1 | seq |
| .....Aaguuggaucucuggguc.....              | 1   | 1 | seq |
| .....uaguuggaucuugCguca.....              | 1   | 1 | seq |
| .....uaguuggaucuGggguca.....              | 1   | 1 | seq |
| .....uaguCgggaucucuggguc.....             | 1   | 1 | seq |
| .....uaguuggaCcuuggguc.....               | 2   | 1 | seq |
| .....uaguuggaucuuAgguca.....              | 1   | 1 | seq |
| .....uaguuggaucucugggucC.....             | 42  | 1 | seq |
| .....uaguuggGuucuggguc.....               | 2   | 1 | seq |
| .....uaAuuggaucucuggguc.....              | 1   | 1 | seq |
| .....uagGuggaucucuggguc.....              | 1   | 1 | seq |
| .....uaguugAaucucuggguc.....              | 1   | 1 | seq |
| .....uaguuggaucucuggguc.....              | 395 | 0 | seq |
| .....uaguuggaucucugggucU.....             | 79  | 1 | seq |
| .....uUguuggaucucuggguc.....              | 2   | 1 | seq |
| .....uagCuggaucucuggguc.....              | 4   | 1 | seq |
| .....uaguuggaGcuuggguc.....               | 1   | 1 | seq |
| .....uaguuggaucucugggucCu.....            | 5   | 1 | seq |
| .....uaguuggaucucugggucC.....             | 1   | 1 | seq |
| .....uaguuggaucucugggucau.....            | 9   | 0 | seq |
| .....uaguuggaucucugggucag.....            | 1   | 1 | seq |
| .....uaguuggaucucugggucUua.....           | 2   | 1 | seq |
| .....uaguuggaucucugggucua.....            | 2   | 0 | seq |
| .....uaguuggaucucugggucCua.....           | 1   | 1 | seq |
| .....uaguuggaucucugggCcaua.....           | 1   | 1 | seq |
| .....uaguuggaucucugggucauGa.....          | 1   | 1 | seq |
| .....uaguuggaucucugggucuaaa.....          | 3   | 0 | seq |
| .....uaguuggaucucugggucuaaaa.....         | 1   | 0 | seq |
| .....uaguuggaucucugggucUuaaag.....        | 2   | 1 | seq |
| .....uaguuggaucucugggucUuaaagg.....       | 1   | 1 | seq |
| .....uaguuggaucucugggucuaaaagg.....       | 1   | 0 | seq |
| .....uaguuggaucucugggucuaaaaggC.....      | 1   | 1 | seq |
| .....uaguuggaucucugggucuaaaaggucg.....    | 2   | 0 | seq |
| .....uaguuggaucucugggucuaaaaggucgguc..... | 1   | 0 | seq |
| .....aguuggaucucugggucC.....              | 6   | 1 | seq |
| .....aguAggaucucuggguc.....               | 1   | 1 | seq |
| .....aguuAgaucucuggguc.....               | 1   | 1 | seq |
| .....aguuggaucucuggguc.....               | 79  | 0 | seq |
| .....aguuggaucucugggucU.....              | 24  | 1 | seq |
| .....aguuggaucucugggucau.....             | 2   | 0 | seq |
| .....aguuggaucucugggucua.....             | 4   | 0 | seq |
| .....aguuggaucucugggucuaaaa.....          | 1   | 0 | seq |
| .....aguuggaucucugggucuaaaaggucgg.....    | 1   | 0 | seq |
| .....guuggaucucugggucCu.....              | 2   | 1 | seq |
| .....guuggaucucugggucau.....              | 10  | 0 | seq |
| .....guuggaucucugggucUua.....             | 1   | 1 | seq |
| .....guuggaucucugggucCua.....             | 1   | 1 | seq |
| .....guuggaucucugggucua.....              | 6   | 0 | seq |
| .....guuggaucucuggAucua.....              | 1   | 1 | seq |
| .....guuggaucucugggucCa.....              | 1   | 1 | seq |
| .....guAggaucucugggucua.....              | 1   | 1 | seq |
| .....guuggaucucugggucuaaaagg.....         | 1   | 0 | seq |
| .....guuggaucucugggucuaaaaggu.....        | 2   | 0 | seq |
| .....guuggaucucugggucuaaaaggucg.....      | 1   | 0 | seq |

## Mature

## Star

uaaguuguuguaguuaaaaaacucguaguuaggauucugggucuaaaaggucggucugccuacucggugugc

|                                         |    |   |     |
|-----------------------------------------|----|---|-----|
| .....guuggaucuugggucuaaaaggucgg.....    | 2  | 0 | seq |
| .....guuggaucuugggucUuaaaaggucgg.....   | 2  | 1 | seq |
| .....guuggaucuugggucuaaaaggucgguc.....  | 1  | 0 | seq |
| .....guuggaucuugggucUuaaaaggucgguc..... | 1  | 1 | seq |
| .....uuggaucuugggucGa.....              | 2  | 1 | seq |
| .....uuggaucuugggucCua.....             | 8  | 1 | seq |
| .....uuggaucuugggucuaa.....             | 18 | 0 | seq |
| .....uuggaucuugggucuaaa.....            | 3  | 0 | seq |
| .....uuggaucuugggucUuaaa.....           | 2  | 1 | seq |
| .....uuggaucuugggucuaaaa.....           | 1  | 0 | seq |
| .....uuggaucuugggucUuaaaag.....         | 1  | 1 | seq |
| .....uuggaucuugggucuaaaaggC.....        | 1  | 1 | seq |
| .....uuggaucuugggucuaaaaggucC.....      | 1  | 1 | seq |
| .....uuggaucuugggucuaaaaggucgg.....     | 1  | 0 | seq |
| .....uuggaucuugggucuaaaaggucgguc.....   | 1  | 0 | seq |
| .....uuggaucuugggucCuaa.....            | 1  | 1 | seq |
| .....uuggaucuugggucauUa.....            | 1  | 1 | seq |
| .....uuggaucuugggucuaaa.....            | 2  | 0 | seq |
| .....uuggaucuugggucuaaaa.....           | 1  | 0 | seq |
| .....uuggaucuugggucuaaaagg.....         | 2  | 0 | seq |
| .....uuggaucuugggucuaaaaggucgg.....     | 2  | 0 | seq |
| .....ggGucuuugggucuaaaagg.....          | 1  | 1 | seq |
| .....ggaucuugggucUuaaaagg.....          | 1  | 1 | seq |
| .....ggaucuugggucuaaaagg.....           | 1  | 0 | seq |
| .....ggaucuugggucuaaaaggucgg.....       | 1  | 0 | seq |
| .....ggaucuugggucuaaaaggucgguc.....     | 1  | 0 | seq |
| .....aucuuugggucuaaaagg.....            | 2  | 0 | seq |
| .....aucuuugggucCuaaaaggucg.....        | 1  | 1 | seq |
| .....aucuuugggucuaaaaggucg.....         | 1  | 0 | seq |
| .....aucuuugggucuaaaaggucgg.....        | 3  | 0 | seq |
| .....aucuuugggCcauaaaaggucgg.....       | 1  | 1 | seq |
| .....aucuuugggucUuaaaaggucgg.....       | 1  | 1 | seq |
| .....aucuuugggucuaaaaggucggucU.....     | 1  | 1 | seq |
| .....aucuuugggucuaaaaggucgguc.....      | 1  | 0 | seq |
| .....ucuuugggucuaaaaggC.....            | 1  | 1 | seq |
| .....ucuuugggucuaaaagg.....             | 2  | 0 | seq |
| .....ucuuugggucuaaaaggucg.....          | 2  | 0 | seq |
| .....ucuuugCgucuaaaaggucg.....          | 1  | 1 | seq |
| .....ucuuugggucuaaaaggucgg.....         | 5  | 0 | seq |
| .....ucuuugggucuaaaaggucggA.....        | 1  | 1 | seq |
| .....ucuuugggucuaaaaggucgguc.....       | 2  | 0 | seq |
| .....cuugggucuaaaagguc.....             | 1  | 0 | seq |
| .....cuugggucuaaaaggucg.....            | 1  | 0 | seq |
| .....cuugggucuaaaaggucgg.....           | 3  | 0 | seq |
| .....cuugggucuaaaaggucgguc.....         | 1  | 0 | seq |
| .....cuugggucuaaaGggucgguc.....         | 1  | 1 | seq |
| .....cuugggucuaaaaggucgguc.....         | 1  | 0 | seq |
| .....uugggucuaaaaggucA.....             | 1  | 1 | seq |
| .....uugggucCuaaaaggucg.....            | 1  | 1 | seq |
| .....uugggucuaaaaggucgg.....            | 1  | 0 | seq |
| .....uugggucuaaaaggucggC.....           | 3  | 1 | seq |
| .....uugggucuaaaaggucggG.....           | 1  | 1 | seq |
| .....uugggucuaaaaggucgguc.....          | 2  | 0 | seq |
| .....uugggucuaaaaggucgg.....            | 1  | 0 | seq |
| .....gggucuaaaaggucgguc.....            | 1  | 0 | seq |
| .....gggucuaaaaggucggC.....             | 1  | 1 | seq |
| .....gggucuaaaaggucgguc.....            | 3  | 0 | seq |
| .....ggucuaaaaggucgguc.....             | 1  | 0 | seq |
| .....uaaaaggucggucugccu.....            | 6  | 0 | seq |
| .....uaaaaggucggucugccC.....            | 1  | 1 | seq |
| .....uaaaaggucggucugccua.....           | 2  | 0 | seq |
| .....uaaaaggucggucugccuaU.....          | 1  | 1 | seq |
| .....uaaaaggucggucugccuaUuc.....        | 1  | 1 | seq |
| .....uaaaaggucggucugccuaUucgg.....      | 3  | 1 | seq |
| .....uaaaaggucggucugccuaUucggugug.....  | 2  | 1 | seq |
| .....uaaaaggucggucugccuaUucggugugc..... | 1  | 1 | seq |
| .....aaaggucggucugccuaUucgg.....        | 3  | 1 | seq |
| .....aaaggucggucugccuaUucggugug.....    | 1  | 1 | seq |
| .....aaaggucggucugccuaUucggugugc.....   | 1  | 1 | seq |
| .....aaaggucggucugccuUc.....            | 1  | 1 | seq |



## Mature

## Star

uaaguuguuguaguuaaaaaacucguaguuuggaucuugggucauaaaggucggucugccuacucggugugc

|                                  |   |   |     |
|----------------------------------|---|---|-----|
| .....aaggucggucugccuaU.....      | 1 | 1 | seq |
| .....aaggucggucugccuaUu.....     | 2 | 1 | seq |
| .....aaggucggucugccuaUucg.....   | 2 | 1 | seq |
| .....aaggucggucugccuaUucgggu.... | 2 | 1 | seq |
| .....aaggucggucugccuaUucggug..   | 1 | 1 | seq |
| .....aaggucggucugccuaUucggugug.  | 3 | 1 | seq |
| .....aggucggucugccuaUuc.....     | 1 | 1 | seq |
| .....aggucggucugccuaUucgg.....   | 2 | 1 | seq |
| .....aggucggucugccuaUucgggu....  | 2 | 1 | seq |
| .....aggucggucugccuaUucggug..    | 1 | 1 | seq |
| .....aggucggucugccuaUucggugug.   | 1 | 1 | seq |
| .....ggucggucugccuaUucgg.....    | 1 | 1 | seq |
| .....ggucggucugccuaUucgggu....   | 1 | 1 | seq |
| .....ggucggucugccuaUucggug..     | 1 | 1 | seq |
| .....gucggucugccuaUucggugu..     | 1 | 1 | seq |
| .....ucggucugccuaUucgggu....     | 2 | 1 | seq |
| .....ucggucugccuaUucggugug..     | 1 | 1 | seq |
| .....cggucugccuaUucggug..        | 1 | 1 | seq |

Provisional ID : MA\_443276\_31200  
Score total : 0.3  
Score for star read(s) : -1.3  
Score for read counts : -0.3  
Score for mfe : 0.4  
Score for randfold : 1.6  
Score for cons. seed :  
Total read count : 11  
Mature read count : 11  
Loop read count : 0  
Star read count : 0

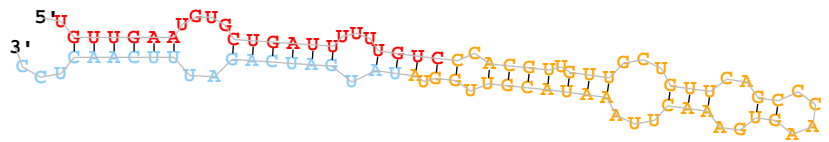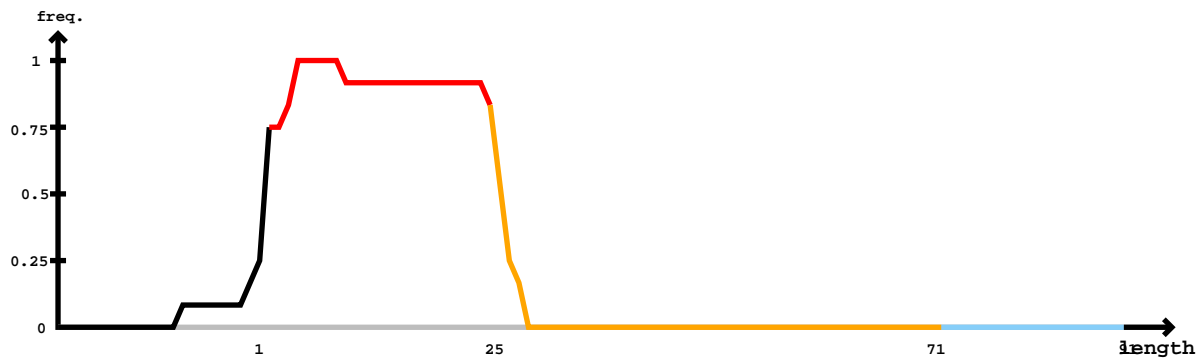

### Mature

### Star

| 5'                                                                                        |       | -3' | exp |     | sample |
|-------------------------------------------------------------------------------------------|-------|-----|-----|-----|--------|
|                                                                                           | reads | mm  |     |     |        |
| uucuuuccuuugaagaagguuguugaugugcugauuuuuuguccacguuguugcugauucagcccaagugaaacuuuuuuacguuggua | 1     | 1   |     | seq |        |
| gaagaagguuguugaaa                                                                         | 1     | 0   |     | seq |        |
| guuguugaugugcugauuuuuugucca                                                               | 1     | 1   |     | seq |        |
| uuguugaaugugcugauuuuuugA                                                                  | 4     | 0   |     | seq |        |
| uguugaaugugcugauuuuuuguc                                                                  | 1     | 1   |     | seq |        |
| uguugaTugugcugauuuuuuguc                                                                  | 1     | 1   |     | seq |        |
| uguugaaugugcugauuuuuuguU                                                                  | 1     | 0   |     | seq |        |
| uugaaugugcugauuuuuugucc                                                                   | 1     | 0   |     | seq |        |
| ugaaugugcugauuuuuuguc                                                                     | 1     | 0   |     | seq |        |
| ugaaugugcugauuuuuugucca                                                                   | 1     | 0   |     | seq |        |

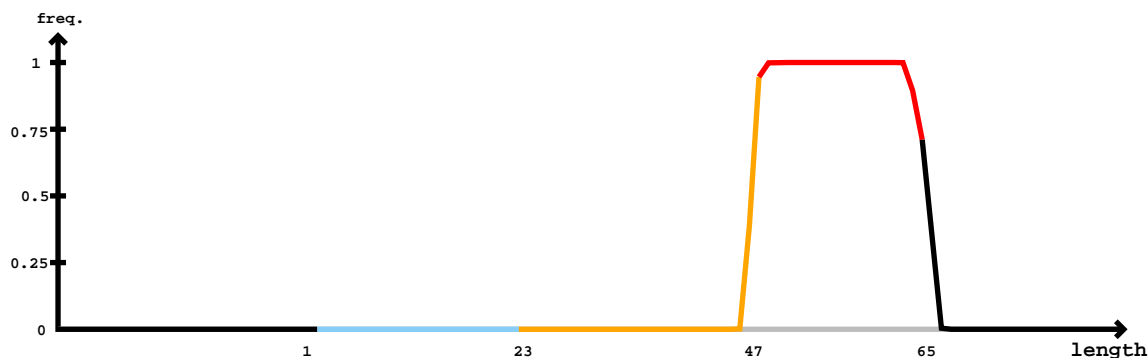

## Mature

## Star

## Mature

|                                                                                                                 |   |   |     |
|-----------------------------------------------------------------------------------------------------------------|---|---|-----|
| auguagaucucauuauuuugagggguuugguauucguuagugugauggguaguguuuguuaccagaaccuauggguuggcgagaagaaucaucauguguagaggguugauu |   |   |     |
| .....gguuggcgagaagaauC.....                                                                                     | 4 | 1 | seq |
| .....gguuggcgagaagaauCu.....                                                                                    | 2 | 1 | seq |
| .....guCggcgagaagaauCu.....                                                                                     | 2 | 1 | seq |
| .....guuggcgagaagaauC.....                                                                                      | 3 | 1 | seq |
| .....guuggcgagaagaauG.....                                                                                      | 1 | 1 | seq |
| .....guuggcgagaagaauCu.....                                                                                     | 3 | 1 | seq |
| .....uuggcgagaagaauCu.....                                                                                      | 6 | 1 | seq |
| .....uCggcgagaagaauuu.....                                                                                      | 3 | 1 | seq |

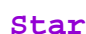

Mature

Star

|                        |                                                   |                       |                  |   |   |     |
|------------------------|---------------------------------------------------|-----------------------|------------------|---|---|-----|
| gcaggccuuuacaaaccuauca | caagaucuucaaaucuggugguggauguugcugaaagaaggcaugcgaa | cagaaaagcucugaagagugu | aguggauugaggcccu |   |   |     |
| .....                  | .....                                             | agaaaagcucugaaAag     | .....            | 1 | 1 | seq |
| .....                  | .....                                             | cucugaagaCuguagug     | .....            | 1 | 1 | seq |
| .....                  | .....                                             | uaguggauugGggcccu     | .....            | 1 | 1 | seq |

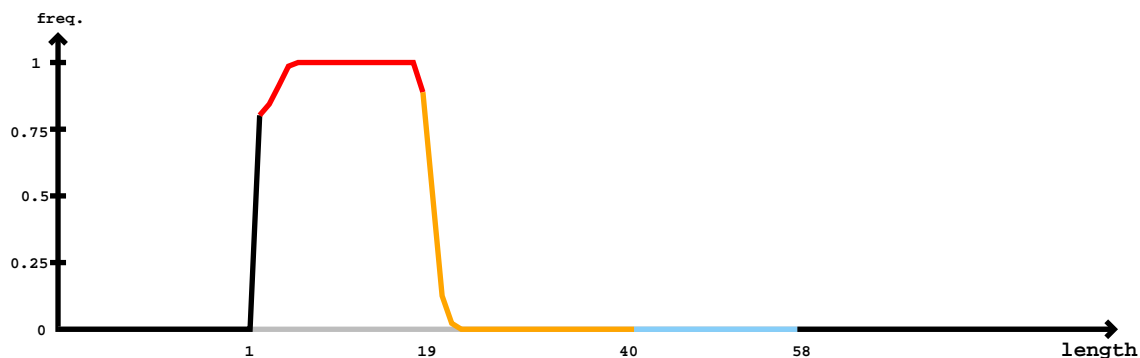

A diagram of a single-stranded RNA molecule. The backbone consists of alternating blue circles (phosphate groups) and grey circles (deoxyribose sugars). The bases are represented by colored letters: orange for Uridine (U), yellow for Adenine (A), green for Guanine (G), and red for Cytosine (C). The sequence from left to right is: U, G, U, U, A, A, C, C, G, U, C, A, A, A, A, U, C, U, A, G, G, A, G, G, U, A, G, C, G, G, A, A. There are several internal base pairs indicated by vertical lines: U-A, G-C, U-G, U-C, A-U, A-U, A-U, A-U, U-C, U-G, A-C, G-C, G-C, U-A, G-C, G-C, A-U, A-U. The 3' end is labeled '3'' and the 5' end is labeled '5''.

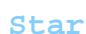[illegible]



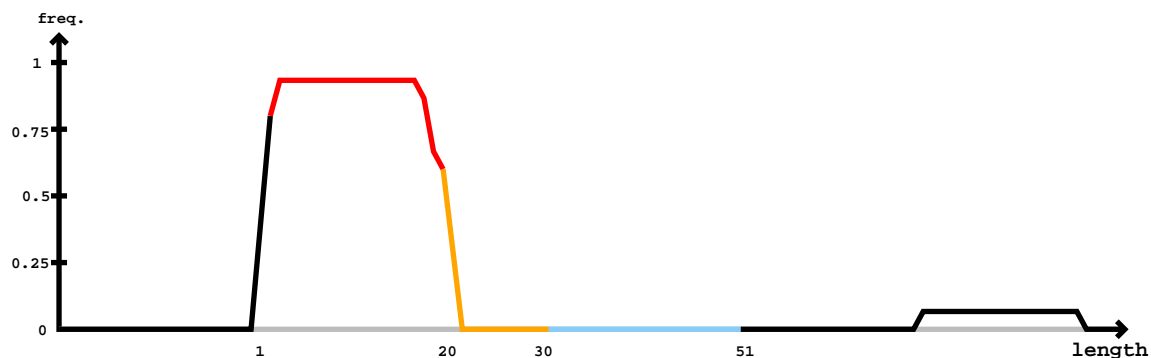

Star

[illegible]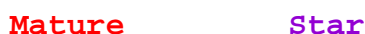

| 5' -                                                                                                                                      | -3'   | obs |        |
|-------------------------------------------------------------------------------------------------------------------------------------------|-------|-----|--------|
|                                                                                                                                           |       | exp | sample |
| gcccgagaggc <u>aauuuucacacuccagaucgggcggucggcgaaugcccaccuugccaucugggagcucu</u> uuugucagccaaugacc <u>ccuuuuaaaa</u> uugucccuucc            |       |     |        |
| goccgagaggc <u>aauuuucacacuccagaucgggcggucggcgaaugcccaccuugccaucugggagcucu</u> uuugucagccaaugacc <u>ccuuuuaaaa</u> uugucccuucc            |       |     |        |
| . . . ((. ((. (((. (((. . . . . ((((((((((. ((((((. ((. ((. . . . ))).)))).) )))))))))) . . . . . (((((. . . . ))) . . . . . ))).)) . . . | reads | mm  | seq    |
| . . . . . uuuucuUcacucccagaucgggcggucugg . . . . .                                                                                        | 1     | 1   | seq    |
| . . . . . ucUcacucccagaucgggcggucuggcg . . . . .                                                                                          | 1     | 1   | seq    |
| . . . . . cuUcacucccagaucgggcgg . . . . .                                                                                                 | 1     | 1   | seq    |
| . . . . . cuUcacucccagaucgggcggucuggcgga . . . . .                                                                                        | 2     | 1   | seq    |
| . . . . . uUcacucccagaucgggcgggu . . . . .                                                                                                | 1     | 1   | seq    |
| . . . . . uUcacucccagaucgggcggucuggcg . . . . .                                                                                           | 1     | 1   | seq    |
| . . . . . Ucacucccagaucgggcg . . . . .                                                                                                    | 1     | 1   | seq    |
| . . . . . ccacucccagaucgggcggucu . . . . .                                                                                                | 1     | 0   | seq    |
| . . . . . Ucacucccagaucgggcggucugg . . . . .                                                                                              | 1     | 1   | seq    |
| . . . . . cacucccagaucgggcg . . . . .                                                                                                     | 3     | 0   | seq    |
| . . . . . cacucccagaucgggcgA . . . . .                                                                                                    | 1     | 1   | seq    |
| . . . . . cacucccagaucgggcgC . . . . .                                                                                                    | 1     | 1   | seq    |
| . . . . . cacucccagaucgggcgg . . . . .                                                                                                    | 5     | 0   | seq    |
| . . . . . cacucccagaucgggcgggu . . . . .                                                                                                  | 4     | 0   | seq    |
| . . . . . cacucccagaucgggcggduc . . . . .                                                                                                 | 2     | 0   | seq    |
| . . . . . cacucccagaucgggcggucC . . . . .                                                                                                 | 1     | 1   | seq    |
| . . . . . cacucccagaucgggcggucugg . . . . .                                                                                               | 2     | 0   | seq    |
| . . . . . cacucccagaucgggcggucuga . . . . .                                                                                               | 1     | 1   | seq    |
| . . . . . cacucccagaucgggcggucuggc . . . . .                                                                                              | 3     | 0   | seq    |
| . . . . . cacucccagaucgggcggucuggcA . . . . .                                                                                             | 1     | 1   | seq    |
| . . . . . cacucccagGucgggcggucuggcg . . . . .                                                                                             | 1     | 1   | seq    |
| . . . . . cacucccagaucgggcggucuggcg . . . . .                                                                                             | 15    | 0   | seq    |
| . . . . . acucccagaucgggAgg . . . . .                                                                                                     | 1     | 1   | seq    |
| . . . . . acucccagaucgggcgg . . . . .                                                                                                     | 3     | 0   | seq    |
| . . . . . acucccagaucgggcgggu . . . . .                                                                                                   | 4     | 0   | seq    |
| . . . . . acucccagaucgggUggucu . . . . .                                                                                                  | 1     | 1   | seq    |
| . . . . . acucccagaucgggcggucug . . . . .                                                                                                 | 1     | 0   | seq    |
| . . . . . acucccagaucgggcggucugg . . . . .                                                                                                | 1     | 0   | seq    |
| . . . . . acucccagaucgggcggucuggc . . . . .                                                                                               | 4     | 0   | seq    |
| . . . . . acucccagaucgggcggucuggcg . . . . .                                                                                              | 10    | 0   | seq    |
| . . . . . acucccagaucgggcggucuggcA . . . . .                                                                                              | 1     | 1   | seq    |
| . . . . . cuccucagaucgggcgggu . . . . .                                                                                                   | 3     | 0   | seq    |
| . . . . . cuccucagaucgggcggc . . . . .                                                                                                    | 2     | 1   | seq    |

# Mature

# Star

|                              |                     |                            |                                        |    |   |     |
|------------------------------|---------------------|----------------------------|----------------------------------------|----|---|-----|
| gcccgcagaggcauuuucuc         | cacuccucagaucggcggu | aaugcccaccuugccaucuggggagc | uuugucagccaaugaccccuuucuaaaauugcccuucc |    |   |     |
| .....cuccucagaucggcggu       | .....               | .....                      | .....                                  | 3  | 0 | seq |
| .....cuccucagaucggcggu       | .....               | .....                      | .....                                  | 1  | 0 | seq |
| .....cuccucagaucggcgguC      | .....               | .....                      | .....                                  | 1  | 1 | seq |
| .....cuccucagaucggcggu       | .....               | .....                      | .....                                  | 1  | 0 | seq |
| .....cuccucagaucggcggu       | .....               | .....                      | .....                                  | 9  | 0 | seq |
| .....cuccucagaucggcgguGg     | .....               | .....                      | .....                                  | 1  | 1 | seq |
| .....cuccucagaucggcgguA      | .....               | .....                      | .....                                  | 2  | 1 | seq |
| .....cuccucagaucggcgguU      | .....               | .....                      | .....                                  | 2  | 1 | seq |
| .....cuccucagaucggcgguGg     | .....               | .....                      | .....                                  | 6  | 0 | seq |
| .....cuccucagaucggcgguGg     | .....               | .....                      | .....                                  | 10 | 0 | seq |
| .....cuccucagaucggcgguGga    | .....               | .....                      | .....                                  | 1  | 0 | seq |
| .....cuccucagaucggcgguCgGgaa | .....               | .....                      | .....                                  | 1  | 1 | seq |
| .....uccucagaucggcgguA       | .....               | .....                      | .....                                  | 1  | 1 | seq |
| .....uccucagaucggcgguU       | .....               | .....                      | .....                                  | 1  | 1 | seq |
| .....uccucagaucggcgguGg      | .....               | .....                      | .....                                  | 1  | 0 | seq |
| .....uccucagaucggcgguGg      | .....               | .....                      | .....                                  | 1  | 0 | seq |
| .....ccucagaucggcggu         | .....               | .....                      | .....                                  | 1  | 1 | seq |
| .....ccucagaucggcgguGg       | .....               | .....                      | .....                                  | 1  | 1 | seq |
| .....ccucagaucggcggu         | .....               | .....                      | .....                                  | 4  | 0 | seq |
| .....ccucagaucggcgguGg       | .....               | .....                      | .....                                  | 2  | 0 | seq |
| .....ccucagaucggcgguGga      | .....               | .....                      | .....                                  | 1  | 0 | seq |
| .....cgcgguGggaugccc         | .....               | .....                      | .....                                  | 1  | 0 | seq |
| .....cccaccuGccaucuggggagc   | .....               | .....                      | .....                                  | 2  | 1 | seq |
| .....ccaccuGccaucuggggagc    | .....               | .....                      | .....                                  | 1  | 1 | seq |
| .....Cgccaucuggggagcuu       | .....               | .....                      | .....                                  | 1  | 1 | seq |
| .....aucuggggagcuuug         | .....               | .....                      | .....                                  | 1  | 0 | seq |

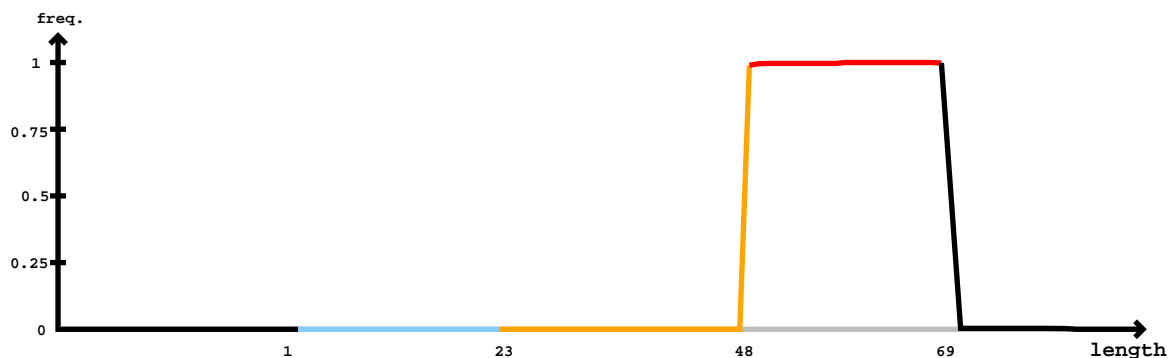

## Mature

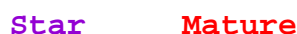[illegible]

# Star Mature

|                                                                   |    |   |     |
|-------------------------------------------------------------------|----|---|-----|
| ggcauggagcgacuguaaacaauucuuuguuugaugucguagauuccuagugaacgucgauacag |    |   |     |
| .....uguuugaugucguagauuccAu.....                                  | 1  | 1 | seq |
| .....uguuugaugucguagau.....                                       | 3  | 0 | seq |
| .....uguuugaugucguagaC.....                                       | 1  | 1 | seq |
| .....uguuugaugucguagauu.....                                      | 6  | 0 | seq |
| .....uguuugaugucgCagauu.....                                      | 1  | 1 | seq |
| .....uguuugaugucguagauuU.....                                     | 1  | 1 | seq |
| .....uguuugaugucguagauuC.....                                     | 1  | 0 | seq |
| .....uguuugaugucguagauucU.....                                    | 1  | 1 | seq |
| .....ugCuugaugucguagauucc.....                                    | 1  | 1 | seq |
| .....uguuugaugucguagauucc.....                                    | 2  | 0 | seq |
| .....uguuugaugucguagauuccu.....                                   | 2  | 0 | seq |
| .....uguuugaugucguagauuccA.....                                   | 5  | 1 | seq |
| .....uguuugaugucguagauuccAu.....                                  | 1  | 1 | seq |
| .....guuugaugucguagauu.....                                       | 3  | 0 | seq |
| .....guuugaugucguagauuc.....                                      | 4  | 0 | seq |
| .....guuugaugucguagauucc.....                                     | 3  | 0 | seq |
| .....guuugaugucguagauCcc.....                                     | 1  | 1 | seq |
| .....guuugaugucguagauucA.....                                     | 1  | 1 | seq |
| .....guuugaugucguagauuccA.....                                    | 2  | 1 | seq |
| .....guuugaugucguagauuccAu.....                                   | 2  | 1 | seq |
| .....guuugaugucguagauuccAuA.....                                  | 1  | 1 | seq |
| .....uuugaugucguagauuc.....                                       | 3  | 0 | seq |
| .....uuugaugucguagauucA.....                                      | 1  | 1 | seq |
| .....uuugaugucguagauucc.....                                      | 4  | 0 | seq |
| .....uuugaugucguagauuccu.....                                     | 4  | 0 | seq |
| .....uuugaugucguagauuccA.....                                     | 11 | 1 | seq |
| .....uugaugucguagauucc.....                                       | 7  | 0 | seq |
| .....uugaugucguagauucA.....                                       | 2  | 1 | seq |
| .....uugaugucguagauuccA.....                                      | 8  | 1 | seq |
| .....uugaugucguagauuccu.....                                      | 1  | 0 | seq |
| .....uugaugucguagauuccuagugaacguca.....                           | 1  | 0 | seq |
| .....ugaugucguagauuccuu.....                                      | 1  | 0 | seq |

[illegible]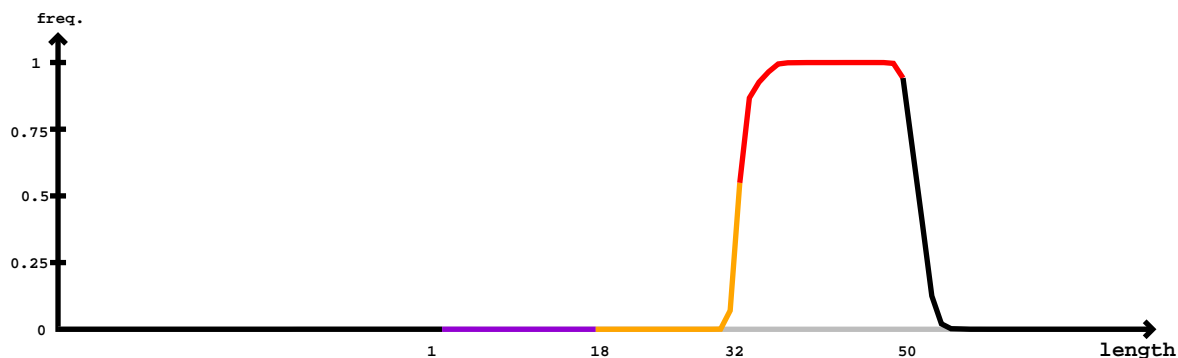

## Mature

[illegible]

## Star

## Mature

auguacaugccuaaaacauagaaauaauugcacuggaucccauuagaacucugcaguuaagcacaaucagggcuagaguaguacugggauggaugaccgucaaggaaguccuag

|                                                      |       |   |     |
|------------------------------------------------------|-------|---|-----|
| .....ggcuagag <u>uag</u> uaGuggggaugg.....           | 1     | 1 | seq |
| .....ggcuagag <u>uag</u> uacuggggaugg.....           | 330   | 0 | seq |
| .....Ngcuagag <u>uag</u> uacuggggaugg.....           | 1     | 1 | seq |
| .....ggcCagag <u>uag</u> uacuggggaugga.....          | 1     | 1 | seq |
| .....ggcuagagCag <u>uac</u> uggggaugga.....          | 1     | 1 | seq |
| .....ggcuagag <u>uag</u> uacuggggaugCa.....          | 1     | 1 | seq |
| .....ggcuagag <u>uag</u> uacuggggaGgga.....          | 1     | 1 | seq |
| .....ggcuagag <u>ua</u> Auacuggggaugga.....          | 1     | 1 | seq |
| .....ggcuagag <u>uag</u> uacuggggaUAga.....          | 1     | 1 | seq |
| .....ggcuagag <u>uag</u> uGcuggggaugga.....          | 1     | 1 | seq |
| .....ggcuagag <u>uag</u> uacuggggaugga.....          | 35    | 0 | seq |
| .....gA <u>cu</u> agag <u>uag</u> uacuggggaugga..... | 1     | 1 | seq |
| .....ggcuagag <u>uag</u> uacuggggauggau.....         | 2     | 0 | seq |
| .....ggcuagag <u>uag</u> uacuggggauggaug.....        | 1     | 0 | seq |
| .....gcuagag <u>uag</u> uacugggg.....                | 3399  | 0 | seq |
| .....gcuCgag <u>uag</u> uacugggg.....                | 1     | 1 | seq |
| .....Ncuagag <u>uag</u> uacugggg.....                | 2     | 1 | seq |
| .....gcuagag <u>uag</u> uaGugggg.....                | 1     | 1 | seq |
| .....gcuCgag <u>uag</u> uacugggga.....               | 2     | 1 | seq |
| .....gcuagag <u>uag</u> uacugggga.....               | 15937 | 0 | seq |
| .....gcuagag <u>u</u> Cguacugggga.....               | 3     | 1 | seq |
| .....gNuagag <u>uag</u> uacugggga.....               | 2     | 1 | seq |
| .....gcuagag <u>uag</u> uaGugggga.....               | 3     | 1 | seq |
| .....Ncuagag <u>uag</u> uacugggga.....               | 24    | 1 | seq |
| .....gcuagag <u>uag</u> uacugggga.....               | 3648  | 0 | seq |
| .....Ncuagag <u>uag</u> uacugggga.....               | 7     | 1 | seq |
| .....gcuagag <u>u</u> Cguacuggggaug.....             | 1     | 1 | seq |
| .....Ncuagag <u>uag</u> uacuggggaug.....             | 8     | 1 | seq |
| .....gNuagag <u>uag</u> uacuggggaug.....             | 2     | 1 | seq |
| .....gcuagag <u>uag</u> uacuggggaug.....             | 7467  | 0 | seq |
| .....gcuagag <u>uag</u> uacuggggaugg.....            | 1676  | 0 | seq |
| .....Ncuagag <u>uag</u> uacuggggaugg.....            | 1     | 1 | seq |
| .....gcuagag <u>u</u> Gguacuggggaugga.....           | 1     | 1 | seq |
| .....gcuagag <u>uag</u> uacuggggGugga.....           | 1     | 1 | seq |
| .....gcuGgag <u>uag</u> uacuggggaugga.....           | 1     | 1 | seq |
| .....gcuagag <u>uag</u> uGcuggggaugga.....           | 1     | 1 | seq |
| .....gCagag <u>uag</u> uacuggggaugga.....            | 1     | 1 | seq |
| .....gcuagGg <u>uag</u> uacuggggaugga.....           | 6     | 1 | seq |
| .....gcuagag <u>uag</u> uacuggggaugga.....           | 97    | 0 | seq |
| .....gUuagag <u>uag</u> uacuggggaugga.....           | 1     | 1 | seq |
| .....gcuagag <u>uag</u> uacuggggaugCa.....           | 1     | 1 | seq |
| .....gcuagag <u>uag</u> uacuggggaCgga.....           | 2     | 1 | seq |
| .....gcuagag <u>uag</u> uacuggggauggaG.....          | 1     | 1 | seq |
| .....gcuagag <u>uag</u> uacuggggauggau.....          | 1     | 0 | seq |
| .....gcuagGg <u>uag</u> uacuggggauggau.....          | 1     | 1 | seq |
| .....gcuagag <u>uag</u> uacuggggauggaug.....         | 3     | 0 | seq |
| .....gcuagag <u>uag</u> uacuggggaugCaug.....         | 1     | 1 | seq |
| .....cuagag <u>uag</u> uacugggga.....                | 11182 | 0 | seq |
| .....Nuagag <u>uag</u> uacugggga.....                | 17    | 1 | seq |
| .....cuagag <u>u</u> Cguacugggga.....                | 1     | 1 | seq |
| .....Nuagag <u>uag</u> uacugggga.....                | 1     | 1 | seq |
| .....cuagag <u>uag</u> uacugggga.....                | 1705  | 0 | seq |
| .....Nuagag <u>uag</u> uacuggggaug.....              | 14    | 1 | seq |
| .....cuCgag <u>uag</u> uacuggggaug.....              | 1     | 1 | seq |
| .....cuagag <u>uag</u> uacuggggaug.....              | 5911  | 0 | seq |
| .....cuagag <u>u</u> Cguacuggggaug.....              | 2     | 1 | seq |
| .....cuagag <u>uag</u> uacuggggaugg.....             | 2280  | 0 | seq |
| .....Nuagag <u>uag</u> uacuggggaugg.....             | 2     | 1 | seq |
| .....cuCgag <u>uag</u> uacuggggaugg.....             | 1     | 1 | seq |
| .....cuagGg <u>uag</u> uacuggggaugga.....            | 23    | 1 | seq |
| .....cCagag <u>uag</u> uacuggggaugga.....            | 2     | 1 | seq |
| .....cuagagCag <u>uac</u> uggggaugga.....            | 1     | 1 | seq |
| .....cuagag <u>u</u> Gguacuggggaugga.....            | 2     | 1 | seq |
| .....cuagag <u>uag</u> uacuggggaGgga.....            | 5     | 1 | seq |
| .....cuagag <u>uag</u> uacuggggaCgga.....            | 1     | 1 | seq |
| .....cuagag <u>uag</u> uacuggggGugga.....            | 1     | 1 | seq |
| .....cuagag <u>uag</u> uacuggggaugga.....            | 286   | 0 | seq |
| .....cuGgag <u>uag</u> uacuggggauggau.....           | 1     | 1 | seq |
| .....cuagGg <u>uag</u> uacuggggauggau.....           | 1     | 1 | seq |
| .....cuagag <u>uag</u> uacuggggauggau.....           | 7     | 0 | seq |



## Star

## Mature

|                                        |                     |           |        |                 |                           |  |  |  |
|----------------------------------------|---------------------|-----------|--------|-----------------|---------------------------|--|--|--|
| auguacaugccuaaaacauagaaauaaugcacuggauc | ccauuagaacucugcaguu | aagcacaau | caggcu | agaguaguacuggga | uggaugaccgucaaggaaguccuag |  |  |  |
| .....cuagaguaguacugggauggaug.....      | 5                   | 0         | seq    |                 |                           |  |  |  |
| .....cuagaguaguacugggauggauc.....      | 1                   | 1         | seq    |                 |                           |  |  |  |
| .....cuagaguaguacugggauggaGg.....      | 1                   | 1         | seq    |                 |                           |  |  |  |
| .....cuagGguaguacugggauggaug.....      | 1                   | 1         | seq    |                 |                           |  |  |  |
| .....cuagaguaguacugggauggaug.....      | 1                   | 1         | seq    |                 |                           |  |  |  |
| .....uagaguaguacugggau.....            | 1470                | 0         | seq    |                 |                           |  |  |  |
| .....uGgaguaguacugggau.....            | 1                   | 1         | seq    |                 |                           |  |  |  |
| .....Nagaguaguacugggau.....            | 2                   | 1         | seq    |                 |                           |  |  |  |
| .....Nagaguaguacugggaug.....           | 1                   | 1         | seq    |                 |                           |  |  |  |
| .....uagaguCguacugggaug.....           | 1                   | 1         | seq    |                 |                           |  |  |  |
| .....uGgaguaguacugggaug.....           | 1                   | 1         | seq    |                 |                           |  |  |  |
| .....uagaguaguacugggaug.....           | 1889                | 0         | seq    |                 |                           |  |  |  |
| .....uagaguaguacugggaugg.....          | 523                 | 0         | seq    |                 |                           |  |  |  |
| .....uagaguGguacugggaugga.....         | 1                   | 1         | seq    |                 |                           |  |  |  |
| .....Cagaguaguacugggaugga.....         | 1                   | 1         | seq    |                 |                           |  |  |  |
| .....uagaguaguacugggaugCa.....         | 2                   | 1         | seq    |                 |                           |  |  |  |
| .....uagGguaguacugggaugga.....         | 8                   | 1         | seq    |                 |                           |  |  |  |
| .....uagaguaguacuggaugga.....          | 1                   | 1         | seq    |                 |                           |  |  |  |
| .....uaUaguaguacugggaugga.....         | 1                   | 1         | seq    |                 |                           |  |  |  |
| .....uagaguaguacuggUaugga.....         | 1                   | 1         | seq    |                 |                           |  |  |  |
| .....uGgaguaguacugggaugga.....         | 1                   | 1         | seq    |                 |                           |  |  |  |
| .....uagaguaguacugggaugga.....         | 69                  | 0         | seq    |                 |                           |  |  |  |
| .....uagaguaguacugggaCgga.....         | 1                   | 1         | seq    |                 |                           |  |  |  |
| .....uagaguaguacugggauggau.....        | 3                   | 0         | seq    |                 |                           |  |  |  |
| .....uagaguaguacugggauggauiA.....      | 1                   | 1         | seq    |                 |                           |  |  |  |
| .....uagaguaguacugggauggaug.....       | 3                   | 0         | seq    |                 |                           |  |  |  |
| .....agaguaguacugggaug.....            | 1946                | 0         | seq    |                 |                           |  |  |  |
| .....Ngaguaguacugggaug.....            | 3                   | 1         | seq    |                 |                           |  |  |  |
| .....Cgaguaguacugggaug.....            | 3                   | 1         | seq    |                 |                           |  |  |  |
| .....agaguaguacugggaugg.....           | 545                 | 0         | seq    |                 |                           |  |  |  |
| .....Ggaguaguacugggaugga.....          | 1                   | 1         | seq    |                 |                           |  |  |  |
| .....agaguaguacugggaCgga.....          | 2                   | 1         | seq    |                 |                           |  |  |  |
| .....agGguaguacugggaugga.....          | 3                   | 1         | seq    |                 |                           |  |  |  |
| .....agaguaUuacugggaugga.....          | 1                   | 1         | seq    |                 |                           |  |  |  |
| .....agaguaguacugggaGgga.....          | 3                   | 1         | seq    |                 |                           |  |  |  |
| .....agaguaguacugggaugga.....          | 97                  | 0         | seq    |                 |                           |  |  |  |
| .....agaguaguacugggauggau.....         | 3                   | 0         | seq    |                 |                           |  |  |  |
| .....Naguaguacugggaugg.....            | 4                   | 1         | seq    |                 |                           |  |  |  |
| .....gaguaguacugggaugg.....            | 1687                | 0         | seq    |                 |                           |  |  |  |
| .....gagCaguacugggaugga.....           | 2                   | 1         | seq    |                 |                           |  |  |  |
| .....Naguaguacugggaugga.....           | 1                   | 1         | seq    |                 |                           |  |  |  |
| .....gaguaguacugggaugga.....           | 266                 | 0         | seq    |                 |                           |  |  |  |
| .....gGguaguacugggaugga.....           | 7                   | 1         | seq    |                 |                           |  |  |  |
| .....gaLuaguacugggaugga.....           | 1                   | 1         | seq    |                 |                           |  |  |  |
| .....gaguaguacugggaCgga.....           | 3                   | 1         | seq    |                 |                           |  |  |  |
| .....gCguaguacugggaugga.....           | 1                   | 1         | seq    |                 |                           |  |  |  |
| .....gaguaguacugggGuugga.....          | 2                   | 1         | seq    |                 |                           |  |  |  |
| .....gagAaguacugggaugga.....           | 1                   | 1         | seq    |                 |                           |  |  |  |
| .....gGguaguacugggauggau.....          | 1                   | 1         | seq    |                 |                           |  |  |  |
| .....gaguaguacugggauggau.....          | 7                   | 0         | seq    |                 |                           |  |  |  |
| .....gaguaguacugggauggaC.....          | 3                   | 1         | seq    |                 |                           |  |  |  |
| .....gaguaguacugggauggaA.....          | 1                   | 1         | seq    |                 |                           |  |  |  |
| .....gaguaguacugggauggaug.....         | 10                  | 0         | seq    |                 |                           |  |  |  |
| .....gaguaguacugggauggaCg.....         | 1                   | 1         | seq    |                 |                           |  |  |  |
| .....gaguaguacugggauggauA.....         | 1                   | 1         | seq    |                 |                           |  |  |  |
| .....aguaguacugggaugga.....            | 266                 | 0         | seq    |                 |                           |  |  |  |
| .....Gguaguacugggaugga.....            | 5                   | 1         | seq    |                 |                           |  |  |  |
| .....aguaguacugggaCgga.....            | 1                   | 1         | seq    |                 |                           |  |  |  |
| .....agAguacugggaugga.....             | 2                   | 1         | seq    |                 |                           |  |  |  |
| .....aLuaguacugggaugga.....            | 1                   | 1         | seq    |                 |                           |  |  |  |
| .....Uguaguacugggaugga.....            | 1                   | 1         | seq    |                 |                           |  |  |  |
| .....aguGguacugggaugga.....            | 1                   | 1         | seq    |                 |                           |  |  |  |
| .....aguaguacugggaGgga.....            | 3                   | 1         | seq    |                 |                           |  |  |  |
| .....aguaguacugggGuugga.....           | 1                   | 1         | seq    |                 |                           |  |  |  |
| .....aguaguacugggauggaG.....           | 1                   | 1         | seq    |                 |                           |  |  |  |
| .....aguaguacugggauggaC.....           | 1                   | 1         | seq    |                 |                           |  |  |  |
| .....aguaguacugggauggau.....           | 10                  | 0         | seq    |                 |                           |  |  |  |
| .....aguUguacugggauggau.....           | 1                   | 1         | seq    |                 |                           |  |  |  |
| .....aguaguacugggauggaCg.....          | 1                   | 1         | seq    |                 |                           |  |  |  |
| .....aguaguacugggauggaug.....          | 7                   | 0         | seq    |                 |                           |  |  |  |

Star

Mature

|                                       |                      |           |        |         |       |         |          |        |        |  |  |  |
|---------------------------------------|----------------------|-----------|--------|---------|-------|---------|----------|--------|--------|--|--|--|
| auguacaugccuaaaacauagaauuaugcacuggauc | ccauuagaacucugcaguu  | aagcacaau | caggcu | agagagu | guacu | gggaugg | augaccgu | caagga | uccuag |  |  |  |
| .....                                 | guaguacugggauggau    | .....     | 11     | 0       | seq   |         |          |        |        |  |  |  |
| .....                                 | guaguacugggaCggau    | .....     | 3      | 1       | seq   |         |          |        |        |  |  |  |
| .....                                 | guaguacugggauggaC    | .....     | 3      | 1       | seq   |         |          |        |        |  |  |  |
| .....                                 | guaguacugggauggaug   | .....     | 6      | 0       | seq   |         |          |        |        |  |  |  |
| .....                                 | guaguacugggauggaCg   | .....     | 2      | 1       | seq   |         |          |        |        |  |  |  |
| .....                                 | Auaguacugggauggaug   | .....     | 1      | 1       | seq   |         |          |        |        |  |  |  |
| .....                                 | guaguacugggauggaGg   | .....     | 1      | 1       | seq   |         |          |        |        |  |  |  |
| .....                                 | guaguacugggauggaugac | .....     | 2      | 0       | seq   |         |          |        |        |  |  |  |
| .....                                 | uaguacugggauggaug    | .....     | 21     | 0       | seq   |         |          |        |        |  |  |  |
| .....                                 | uaguacugggauAgaug    | .....     | 1      | 1       | seq   |         |          |        |        |  |  |  |
| .....                                 | uaguacugggauggaGg    | .....     | 1      | 1       | seq   |         |          |        |        |  |  |  |
| .....                                 | uaguacugggauggauA    | .....     | 2      | 1       | seq   |         |          |        |        |  |  |  |
| .....                                 | uaguacugggauggaugacc | .....     | 1      | 0       | seq   |         |          |        |        |  |  |  |
| .....                                 | aguacugggauggauga    | .....     | 1      | 0       | seq   |         |          |        |        |  |  |  |
| .....                                 | aguacugggauggaugacc  | .....     | 1      | 0       | seq   |         |          |        |        |  |  |  |
| .....                                 | acugggauggaugaccC    | .....     | 1      | 1       | seq   |         |          |        |        |  |  |  |

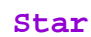[illegible]

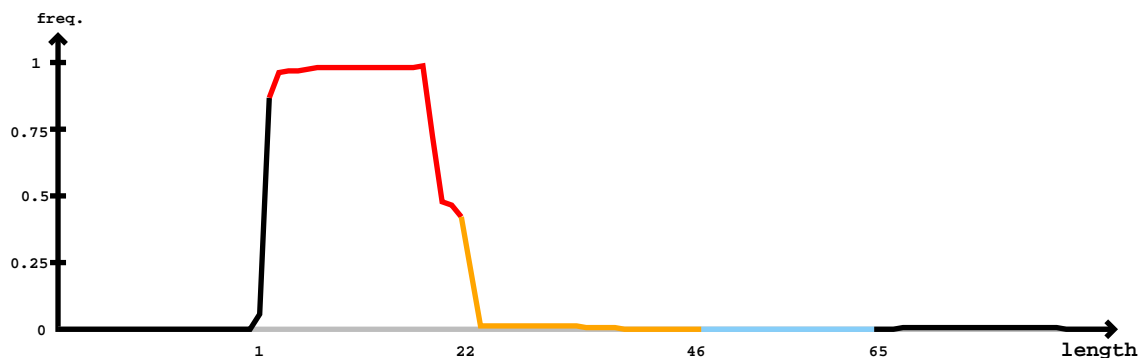

Star

[illegible]

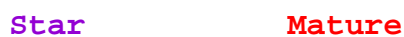[illegible]

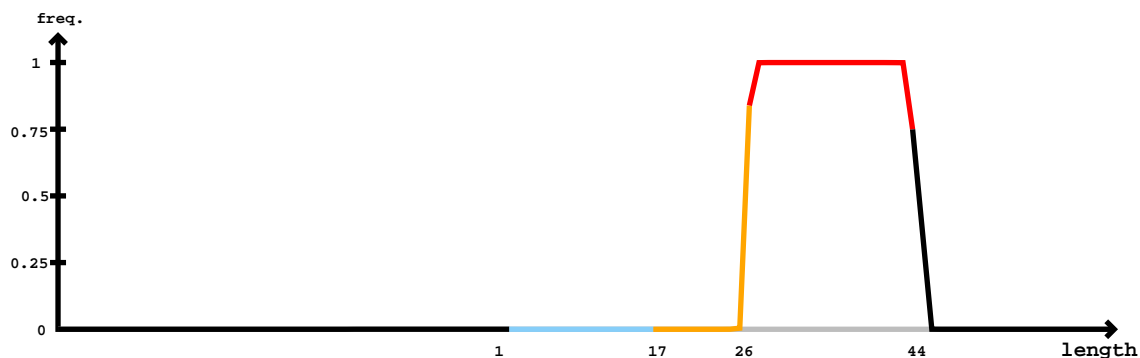

| 5'-   | aaauggaaaaauuuauuaugaaauaacguuagugugugugcggcggggguuagggcugggacuaagccccagcccuuggucgcccagcacauccacaugaccgaaac | -3'   | exp |        |
|-------|-------------------------------------------------------------------------------------------------------------|-------|-----|--------|
| ...   | (((((.....(((.....)))((((.....(((.....(((.....(((.....))).....))).....))).....))).....))).....              | reads | mm  | sample |
| ..... | uuaguugguggAcggcg.....                                                                                      | 1     | 1   | seq    |
| ..... | Uccagcccuuggucgcc.....                                                                                      | 1     | 1   | seq    |
| ..... | Acagcccuuggucgcc.....                                                                                       | 1     | 1   | seq    |
| ..... | ccagcccuuggucgcc.....                                                                                       | 1     | 0   | seq    |
| ..... | Gcagcccuuggucgccca.....                                                                                     | 1     | 1   | seq    |
| ..... | ccagcccuuggucgccC.....                                                                                      | 2     | 1   | seq    |
| ..... | ccagcccuuggucgccU.....                                                                                      | 3     | 1   | seq    |
| ..... | ccagcccuuggucgccCc.....                                                                                     | 5     | 1   | seq    |
| ..... | Ucagcccuuggucgcccg.....                                                                                     | 9     | 1   | seq    |
| ..... | cagcccuuggucgccC.....                                                                                       | 1154  | 1   | seq    |
| ..... | cagcccuuggucgccG.....                                                                                       | 5     | 1   | seq    |
| ..... | cagcccuugAucgccca.....                                                                                      | 1     | 1   | seq    |
| ..... | cagUccuuggucgccca.....                                                                                      | 1     | 1   | seq    |
| ..... | cagcccCuggucgccca.....                                                                                      | 1     | 1   | seq    |
| ..... | cagcccuuggucgccca.....                                                                                      | 47    | 0   | seq    |
| ..... | cagcccuuggucgccU.....                                                                                       | 183   | 1   | seq    |
| ..... | cagcccuuggucgccUg.....                                                                                      | 22    | 1   | seq    |
| ..... | cagcccuuggucgccGg.....                                                                                      | 3     | 1   | seq    |
| ..... | cagcccuuggucgcccg.....                                                                                      | 18    | 0   | seq    |
| ..... | cagcccuuggucgcccaU.....                                                                                     | 1     | 1   | seq    |
| ..... | cagcccuuggucgccCc.....                                                                                      | 3223  | 1   | seq    |
| ..... | cagcccuuggucgcccaA.....                                                                                     | 2     | 1   | seq    |
| ..... | cagcccuuggucgccCcgc.....                                                                                    | 4     | 1   | seq    |
| ..... | cagcccuuggucgccccagA.....                                                                                   | 1     | 1   | seq    |
| ..... | cagcccuuggucgccCcgcA.....                                                                                   | 1     | 1   | seq    |
| ..... | agcccuuggucgcccg.....                                                                                       | 4     | 0   | seq    |
| ..... | agcccuuggucgccUg.....                                                                                       | 2     | 1   | seq    |
| ..... | agcccuuggucgccCc.....                                                                                       | 890   | 1   | seq    |
| ..... | gcccuuggucgccCcgc.....                                                                                      | 2     | 1   | seq    |
| ..... | gcccuuggucgccccagU.....                                                                                     | 1     | 1   | seq    |

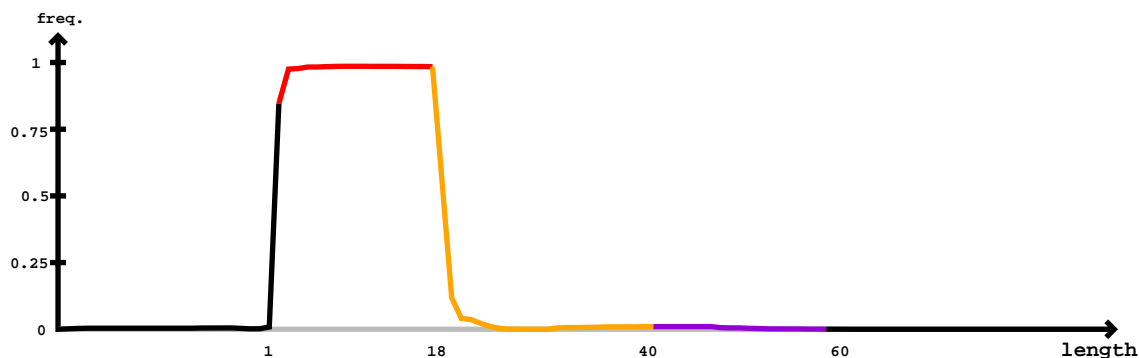

Star

[illegible]

## Mature

## Star

cuuugugaaauggcuugaaacguguaagaaagugggagucgguuuucgaugcaagugaaauaccacuaucuaacauuuuacuuauuauucuaagggcagagaugg

|                                       |      |   |     |
|---------------------------------------|------|---|-----|
| .....CguguaagaaauaagugggagCcguuu..... | 4    | 1 | seq |
| .....guguaagaaauaaguggga.....         | 5287 | 0 | seq |
| .....guguaagGauaaaguggga.....         | 13   | 1 | seq |
| .....gugAagaauaaguggga.....           | 2    | 1 | seq |
| .....Nuguaagaaauaaguggga.....         | 5    | 1 | seq |
| .....guguaagaaauaagGggga.....         | 5    | 1 | seq |
| .....Auguaagaaauaaguggga.....         | 14   | 1 | seq |
| .....guguaagaaauaagCggga.....         | 17   | 1 | seq |
| .....guCuagaauaaguggga.....           | 2    | 1 | seq |
| .....guguaagaaauaaguCgga.....         | 1    | 1 | seq |
| .....guguaagaaauaaguggCa.....         | 14   | 1 | seq |
| .....gGguaagaaauaaguggga.....         | 1    | 1 | seq |
| .....guguGgaauaaguggga.....           | 17   | 1 | seq |
| .....guguaagaaauaagugggU.....         | 38   | 1 | seq |
| .....guguaagaaGaauguggga.....         | 2    | 1 | seq |
| .....guguaagaaauaagugCga.....         | 3    | 1 | seq |
| .....gugCagaauaaguggga.....           | 9    | 1 | seq |
| .....guguaCaauaaguggga.....           | 1    | 1 | seq |
| .....guguUgaauaaguggga.....           | 3    | 1 | seq |
| .....gAguagaauaaguggga.....           | 1    | 1 | seq |
| .....guguaagaaauaagCgggag.....        | 4    | 1 | seq |
| .....guguaagaaauaagugggag.....        | 1101 | 0 | seq |
| .....guguaagGauaagugggag.....         | 3    | 1 | seq |
| .....guguaagGuaagugggag.....          | 3    | 1 | seq |
| .....guguaCaauaagugggag.....          | 1    | 1 | seq |
| .....Nuguaagaaauaagugggag.....        | 2    | 1 | seq |
| .....guguaagaaauaagugggUg.....        | 3    | 1 | seq |
| .....guguGgaauaagugggag.....          | 1    | 1 | seq |
| .....gCguaagaaauaagugggag.....        | 4    | 1 | seq |
| .....gugCagaauaagugggag.....          | 3    | 1 | seq |
| .....Auguaagaaauaagugggag.....        | 1    | 1 | seq |
| .....guguaagaaauaaguggAagu.....       | 1    | 1 | seq |
| .....gugCagaauaagugggagu.....         | 2    | 1 | seq |
| .....guguaagaaauaAugggagu.....        | 1    | 1 | seq |
| .....guguaagaaauGgugggagu.....        | 1    | 1 | seq |
| .....guguaagaaauaagugggagu.....       | 354  | 0 | seq |
| .....guguGgaauaagugggagu.....         | 3    | 1 | seq |
| .....gCguaagaaauaagugggagu.....       | 2    | 1 | seq |
| .....guguaagGuaagugggagu.....         | 1    | 1 | seq |
| .....guguaagaaauaagugggCguc.....      | 2    | 1 | seq |
| .....guguaagaaauaagugggaguc.....      | 14   | 0 | seq |
| .....guguaagaaUGaugugggaguc.....      | 1    | 1 | seq |
| .....guguaagaaauaagCgggagucg.....     | 1    | 1 | seq |
| .....guguaagaaauaagugggCgucg.....     | 1    | 1 | seq |
| .....guguaagaaauaaguggAagucg.....     | 1    | 1 | seq |
| .....guguaagaaauaagugggagucU.....     | 3    | 1 | seq |
| .....guguaagaaauaagAgggagucg.....     | 1    | 1 | seq |
| .....guAuaagaaauaagugggagucg.....     | 1    | 1 | seq |
| .....guguaagaaauaagugggagucg.....     | 40   | 0 | seq |
| .....guguaagaaauaagugggagAcg.....     | 19   | 1 | seq |
| .....guguaagaaauaagugggaAucg.....     | 1    | 1 | seq |
| .....guguaagaaauaagugggagAcgu.....    | 14   | 1 | seq |
| .....guguaagaaCaagugggagucgu.....     | 1    | 1 | seq |
| .....guguaagaaauaagugggagucgG.....    | 2    | 1 | seq |
| .....guguaagaaauaagugggagucgu.....    | 25   | 0 | seq |
| .....guguaagaaauaagugggagucgC.....    | 11   | 1 | seq |
| .....guguaagaaauaagugggagucguu.....   | 14   | 0 | seq |
| .....guguaagaaauaagugggagAcguu.....   | 2    | 1 | seq |
| .....guguaagaaauaagugggagucguC.....   | 2    | 1 | seq |
| .....guguaagaaauaagugggagucguG.....   | 1    | 1 | seq |
| .....guguaagaaauaagugggagucguuu.....  | 6    | 0 | seq |
| .....guguaagaaauaagugggagucguuuA..... | 1    | 1 | seq |
| .....ugAagaauaagugggag.....           | 1    | 1 | seq |
| .....Nguagaauaagugggag.....           | 2    | 1 | seq |
| .....Cguaagaaauaagugggag.....         | 2    | 1 | seq |
| .....uguagaauaaAugggag.....           | 1    | 1 | seq |
| .....uguGgaauaagugggag.....           | 3    | 1 | seq |
| .....ugGagaauaagugggag.....           | 1    | 1 | seq |
| .....uguagaauaagugggag.....           | 725  | 0 | seq |
| .....uguUgaauaagugggag.....           | 1    | 1 | seq |



## Mature

## Star

|                       |          |          |          |         |               |              |           |             |        |            |     |
|-----------------------|----------|----------|----------|---------|---------------|--------------|-----------|-------------|--------|------------|-----|
| uuuugugaaauggcuugaaac | guguagaa | aaugggga | gucguuuu | cgaugca | agugaaa       | uaccacua     | cuaacauca | uuuuuacuuuu | auucua | agggcagaga | ugg |
| .....                 | ugua     | Gau      | aag      | ugggag  | .....         | 4            | 1         | seq         |        |            |     |
| .....                 | Ggu      | aga      | aa       | aag     | ugggag        | .....        | 1         | 1           | seq    |            |     |
| .....                 | ug       | Ca       | ga       | aa      | aag           | ugggag       | .....     | 3           | 1      | seq        |     |
| .....                 | ugu      | aga      | aa       | aag     | ugggUg        | .....        | 4         | 1           | seq    |            |     |
| .....                 | uNu      | aga      | aa       | aag     | ugggag        | .....        | 1         | 1           | seq    |            |     |
| .....                 | ugu      | aga      | Gu       | aag     | ugggag        | .....        | 1         | 1           | seq    |            |     |
| .....                 | ugu      | aga      | aa       | aag     | ugggUgu       | .....        | 3         | 1           | seq    |            |     |
| .....                 | Ngu      | aga      | aa       | aag     | ugggagu       | .....        | 2         | 1           | seq    |            |     |
| .....                 | ugu      | aga      | aa       | aagu    | Cggagu        | .....        | 1         | 1           | seq    |            |     |
| .....                 | ugu      | aga      | aa       | aag     | uggAagu       | .....        | 1         | 1           | seq    |            |     |
| .....                 | ugu      | G        | ga       | aa      | aag           | ugggagu      | .....     | 1           | 1      | seq        |     |
| .....                 | ugu      | aga      | aa       | aag     | ugggagu       | .....        | 263       | 0           | seq    |            |     |
| .....                 | ug       | G        | ga       | aa      | aag           | ugggagu      | .....     | 1           | 1      | seq        |     |
| .....                 | ugu      | aga      | aa       | aag     | Agggagu       | .....        | 1         | 1           | seq    |            |     |
| .....                 | ugu      | aga      | aa       | aag     | ugggaguG      | .....        | 1         | 1           | seq    |            |     |
| .....                 | ugu      | aga      | aa       | Ug      | ugggaguc      | .....        | 1         | 1           | seq    |            |     |
| .....                 | ugu      | aga      | aa       | aag     | ugggaguc      | .....        | 10        | 0           | seq    |            |     |
| .....                 | ugu      | aga      | aa       | aag     | ugggaguA      | .....        | 2         | 1           | seq    |            |     |
| .....                 | ugu      | ag       | U        | aa      | aag           | ugggagucg    | .....     | 1           | 1      | seq        |     |
| .....                 | ugu      | aga      | aa       | aag     | ugggagucU     | .....        | 1         | 1           | seq    |            |     |
| .....                 | ugu      | aga      | aa       | aag     | ugggagAcg     | .....        | 8         | 1           | seq    |            |     |
| .....                 | ugu      | aga      | aa       | aag     | ugggagucg     | .....        | 14        | 0           | seq    |            |     |
| .....                 | ugu      | aga      | aa       | aag     | ugggagucgG    | .....        | 1         | 1           | seq    |            |     |
| .....                 | ugu      | aga      | aa       | aag     | ugggagucgu    | .....        | 13        | 0           | seq    |            |     |
| .....                 | ugu      | aga      | aa       | aag     | ugggagAcgu    | .....        | 1         | 1           | seq    |            |     |
| .....                 | ugu      | aga      | aa       | aag     | ugggagAcguu   | .....        | 1         | 1           | seq    |            |     |
| .....                 | ugu      | aga      | aa       | aag     | ugggagucguu   | .....        | 9         | 0           | seq    |            |     |
| .....                 | ugu      | aga      | aa       | aag     | ugggagucguuu  | .....        | 1         | 0           | seq    |            |     |
| .....                 | ugu      | aga      | aa       | aag     | ugggagucguuuA | .....        | 1         | 1           | seq    |            |     |
| .....                 | g        | u        | aga      | aa      | aG            | g            | u         | g           | g      | g          | g   |
| .....                 | C        | u        | aga      | aa      | aag           | ugggagu      | .....     | 1           | 1      | seq        |     |
| .....                 | g        | u        | aga      | aa      | aag           | ugggagu      | .....     | 10          | 0      | seq        |     |
| .....                 | g        | u        | aga      | aa      | aag           | ugggaguc     | .....     | 1           | 0      | seq        |     |
| .....                 | g        | u        | aga      | aa      | aag           | ugggagucg    | .....     | 1           | 0      | seq        |     |
| .....                 | g        | u        | aga      | aa      | aag           | ugggagucgu   | .....     | 2           | 0      | seq        |     |
| .....                 | g        | u        | aga      | aa      | aag           | ugggagucguu  | .....     | 1           | 0      | seq        |     |
| .....                 | g        | u        | aga      | aa      | aag           | ugggagucguuu | .....     | 1           | 0      | seq        |     |
| .....                 | u        | a        | ga       | aa      | aag           | ugggaguG     | .....     | 1           | 1      | seq        |     |
| .....                 | u        | a        | ga       | aa      | aag           | ugggagAcg    | .....     | 7           | 1      | seq        |     |
| .....                 | u        | a        | ga       | aa      | aag           | ugggagucg    | .....     | 14          | 0      | seq        |     |
| .....                 | u        | a        | ga       | aa      | aag           | ugggagucU    | .....     | 1           | 1      | seq        |     |
| .....                 | u        | a        | ga       | aa      | aag           | ugggagucgC   | .....     | 3           | 1      | seq        |     |
| .....                 | u        | a        | ga       | aa      | aag           | ugggagucgA   | .....     | 1           | 1      | seq        |     |
| .....                 | u        | a        | ga       | aa      | aag           | ugggagAcgu   | .....     | 2           | 1      | seq        |     |
| .....                 | u        | a        | ga       | aa      | aag           | ugggagucgu   | .....     | 7           | 0      | seq        |     |
| .....                 | u        | a        | ga       | aa      | Ca            | a            | g         | u           | g      | g          | g   |
| .....                 | u        | a        | ga       | aa      | aag           | ugggagucguu  | .....     | 1           | 1      | seq        |     |
| .....                 | u        | a        | ga       | aa      | aag           | ugggagucguA  | .....     | 1           | 1      | seq        |     |
| .....                 | u        | a        | ga       | aa      | aag           | ugggagucguu  | .....     | 8           | 0      | seq        |     |
| .....                 | u        | a        | ga       | aa      | aag           | ugggagucguC  | .....     | 2           | 1      | seq        |     |
| .....                 | a        | g        | a        | a       | u             | a            | a         | a           | a      | a          | a   |
| .....                 | g        | a        | a        | u       | a             | a            | a         | a           | a      | a          | a   |
| .....                 | g        | a        | a        | u       | a             | a            | a         | a           | a      | a          | a   |
| .....                 | g        | a        | a        | u       | a             | a            | a         | a           | a      | a          | a   |
| .....                 | g        | a        | a        | u       | a             | a            | a         | a           | a      | a          | a   |
| .....                 | g        | a        | a        | u       | a             | a            | a         | a           | a      | a          | a   |
| .....                 | g        | a        | a        | u       | a             | a            | a         | a           | a      | a          | a   |
| .....                 | g        | a        | a        | u       | a             | a            | a         | a           | a      | a          | a   |
| .....                 | g        | a        | a        | u       | a             | a            | a         | a           | a      | a          | a   |
| .....                 | g        | a        | a        | u       | a             | a            | a         | a           | a      | a          | a   |
| .....                 | g        | a        | a        | u       | a             | a            | a         | a           | a      | a          | a   |
| .....                 | g        | a        | a        | u       | a             | a            | a         | a           | a      | a          | a   |
| .....                 | g        | a        | a        | u       | a             | a            | a         | a           | a      | a          | a   |
| .....                 | g        | a        | a        | u       | a             | a            | a         | a           | a      | a          | a   |
| .....                 | g        | a        | a        | u       | a             | a            | a         | a           | a      | a          | a   |
| .....                 | g        | a        | a        | u       | a             | a            | a         | a           | a      | a          | a   |
| .....                 | g        | a        | a        | u       | a             | a            | a         | a           | a      | a          | a   |
| .....                 | g        | a        | a        | u       | a             | a            | a         | a           | a      | a          | a   |
| .....                 | g        | a        | a        | u       | a             | a            | a         | a           | a      | a          | a   |
| .....                 | g        | a        | a        | u       | a             | a            | a         | a           | a      | a          | a   |
| .....                 | g        | a        | a        | u       | a             | a            | a         | a           | a      | a          | a   |
| .....                 | g        | a        | a        | u       | a             | a            | a         | a           | a      | a          | a   |
| .....                 | g        | a        | a        | u       | a             | a            | a         | a           | a      | a          | a   |
| .....                 | g        | a        | a        | u       | a             | a            | a         | a           | a      | a          | a   |
| .....                 | g        | a        | a        | u       | a             | a            | a         | a           | a      | a          | a   |
| .....                 | g        | a        | a        | u       | a             | a            | a         | a           | a      | a          | a   |
| .....                 | g        | a        | a        | u       | a             | a            | a         | a           | a      | a          | a   |
| .....                 | g        | a        | a        | u       | a             | a            | a         | a           | a      | a          | a   |
| .....                 | g        | a        | a        | u       | a             | a            | a         | a           | a      | a          | a   |
| .....                 | g        | a        | a        | u       | a             | a            | a         | a           | a      | a          | a   |
| .....                 | g        | a        | a        | u       | a             | a            | a         | a           | a      | a          | a   |
| .....                 | g        | a        | a        | u       | a             | a            | a         | a           | a      | a          | a   |
| .....                 | g        | a        | a        | u       | a             | a            | a         | a           | a      | a          | a   |
| .....                 | g        | a        | a        | u       | a             | a            | a         | a           | a      | a          | a   |
| .....                 | g        | a        | a        | u       | a             | a            | a         | a           | a      | a          | a   |
| .....                 | g        | a        | a        | u       | a             | a            | a         | a           | a      | a          | a   |
| .....                 | g        | a        | a        | u       | a             | a            | a         | a           | a      | a          | a   |
| .....                 | g        | a        | a        | u       | a             | a            | a         | a           | a      | a          | a   |
| .....                 | g        | a        | a        | u       | a             | a            | a         | a           | a      | a          | a   |
| .....                 | g        | a        | a        | u       | a             | a            | a         | a           | a      | a          | a   |
| .....                 | g        | a        | a        | u       | a             | a            | a         | a           | a      | a          | a   |
| .....                 | g        | a        | a        | u       | a             | a            | a         | a           | a      | a          | a   |
| .....                 | g        | a        | a        | u       | a             | a            | a         | a           | a      | a          | a   |
| .....                 | g        | a        | a        | u       | a             | a            | a         | a           | a      | a          | a   |
| .....                 | g        | a        | a        | u       | a             | a            | a         | a           | a      | a          | a   |
| .....                 | g        | a        | a        | u       | a             | a            | a         | a           | a      | a          | a   |
| .....                 | g        | a        | a        | u       | a             | a            | a         | a           | a      | a          | a   |
| .....                 | g        | a        | a        | u       | a             | a            | a         | a           | a      | a          | a   |
| .....                 | g        | a        | a        | u       | a             | a            | a         | a           | a      | a          | a   |
| .....                 | g        | a        | a        | u       | a             | a            | a         | a           | a      | a          | a   |
| .....                 | g        | a        | a        | u       | a             | a            | a         | a           | a      | a          | a   |
| .....                 | g        | a        | a        | u       | a             | a            | a         | a           | a      | a          | a   |
| .....                 | g        | a        | a        | u       | a             | a            | a         | a           | a      | a          | a   |
| .....                 | g        | a        | a        | u       |               |              |           |             |        |            |     |

# Mature

# Star

cuuugugaaauggcuugaaacguguagaauaagugggagucguuuucgaugcaagugaaauaccacuacuuuaacaucauuuuacuuauuauucuagggcagagaugg

|                                            |    |   |     |
|--------------------------------------------|----|---|-----|
| .....gcaagugaaa <u>uaccacua</u> C.....     | 2  | 1 | seq |
| .....gcaagugaaa <u>uaccacua</u> cu.....    | 2  | 0 | seq |
| .....caagugaaa <u>uaccacua</u> a.....      | 2  | 0 | seq |
| .....caagugaaa <u>uaccacua</u> C.....      | 1  | 1 | seq |
| .....caagugaaa <u>uaccacua</u> cu.....     | 1  | 0 | seq |
| .....caagugaaa <u>uaccacua</u> Cg.....     | 2  | 1 | seq |
| .....caagugaaa <u>uaccacua</u> cuu.....    | 2  | 0 | seq |
| .....caagugaaa <u>uaccacua</u> cuuc.....   | 1  | 0 | seq |
| .....caagugaaa <u>uaccacua</u> cuucua..... | 1  | 0 | seq |
| .....aagugaaa <u>uaccacua</u> cu.....      | 1  | 0 | seq |
| .....agugaaa <u>uaccacua</u> cu.....       | 5  | 0 | seq |
| .....gugaaa <u>uaccacua</u> cuu.....       | 1  | 1 | seq |
| .....gugaaa <u>uaccacua</u> Cu.....        | 1  | 1 | seq |
| .....gugaaa <u>uaccacua</u> cuu.....       | 1  | 0 | seq |
| .....gugaaa <u>uaccacua</u> cuuc.....      | 1  | 0 | seq |
| .....ugaaa <u>uaccacua</u> cuuc.....       | 10 | 0 | seq |
| .....ugaaa <u>uaccacua</u> cuucuaacGu..... | 1  | 1 | seq |
| .....aa <u>uaccacua</u> cuucuaac.....      | 1  | 0 | seq |
| .....aa <u>uaccacua</u> cuucuaacGu.....    | 1  | 1 | seq |
| .....au <u>uaccacua</u> cuucuaac.....      | 4  | 0 | seq |
| .....au <u>uaccacua</u> cuucuaacGu.....    | 1  | 1 | seq |
| .....u <u>uaccacua</u> cuucuaacGuC.....    | 1  | 1 | seq |
| .....acc <u>uacua</u> cuucuaacGuC.....     | 1  | 1 | seq |
| .....cc <u>uacua</u> cuucuaacGuC.....      | 1  | 1 | seq |

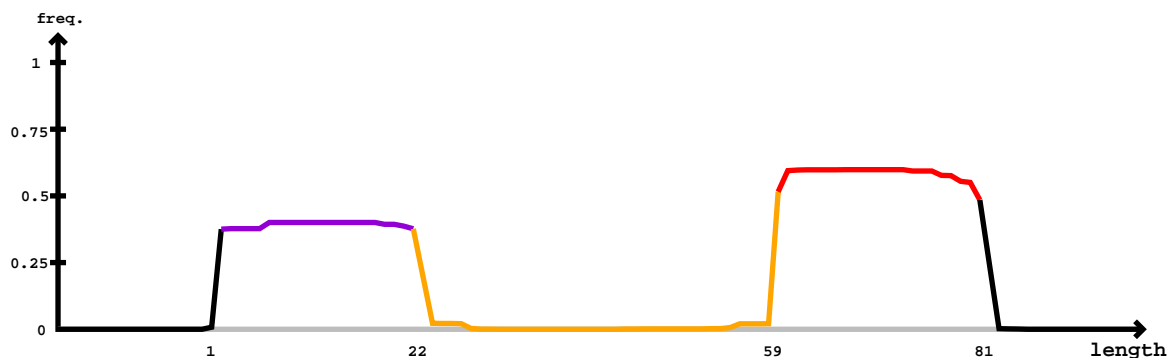

## Mature

[illegible]

## Star

## Mature

|                                                                                                                    |     |   |     |
|--------------------------------------------------------------------------------------------------------------------|-----|---|-----|
| accugggcaauuacucuccaccuccacaagacacuuguuuuuuugaaaagacguucugucugggaccuagagaacaagugucuuauuggauguugagaguaaaggggccauuuu |     |   |     |
| .....uccaccuccaUaagacacuugu.....                                                                                   | 1   | 1 | seq |
| .....uccaUuccacaagacacuugu.....                                                                                    | 4   | 1 | seq |
| .....uccaccuccacaagacacuuAu.....                                                                                   | 1   | 1 | seq |
| .....uccaccuccacaagacacuugG.....                                                                                   | 3   | 1 | seq |
| .....uccaccuccacaagacacuugu.....                                                                                   | 265 | 0 | seq |
| .....uccaccCccacaagacacuugu.....                                                                                   | 1   | 1 | seq |
| .....uccaccuccacaUgacacuugu.....                                                                                   | 1   | 1 | seq |
| .....uccaccuccacaagacacuugC.....                                                                                   | 32  | 1 | seq |
| .....uccaccuccacaagacacCugu.....                                                                                   | 2   | 1 | seq |
| .....uccaccuccacGagacacuugu.....                                                                                   | 1   | 1 | seq |
| .....uccacAuccacaagacacuugu.....                                                                                   | 1   | 1 | seq |
| .....Gccaccuccacaagacacuugu.....                                                                                   | 1   | 1 | seq |
| .....Cccaccuccacaagacacuugu.....                                                                                   | 1   | 1 | seq |
| .....uccaccuccacaagacacuCgu.....                                                                                   | 1   | 1 | seq |
| .....uccaccuccacaagacacuugA.....                                                                                   | 1   | 1 | seq |
| .....uccaccuccGcaagacacuugu.....                                                                                   | 3   | 1 | seq |
| .....uccaccucUacaagacacuugu.....                                                                                   | 1   | 1 | seq |
| .....uccaccuccacaagacacGugu.....                                                                                   | 1   | 1 | seq |
| .....ucUaccuccacaagacacuugu.....                                                                                   | 1   | 1 | seq |
| .....ccaccuccacaagacacuu.....                                                                                      | 1   | 0 | seq |
| .....ccaccuccacaagacacuug.....                                                                                     | 1   | 0 | seq |
| .....ccaccuccacaagacacuugu.....                                                                                    | 2   | 0 | seq |
| .....cuccacaagacacuugC.....                                                                                        | 1   | 1 | seq |
| .....cuccacaagacacuugu.....                                                                                        | 1   | 0 | seq |
| .....cuccacaagacacuuguu.....                                                                                       | 1   | 0 | seq |
| .....cuccacaagacacuuguuuu.....                                                                                     | 2   | 0 | seq |
| .....cuccacaagacacuuguuuuG.....                                                                                    | 1   | 1 | seq |
| .....cuccacaagacacuuguuuuuc.....                                                                                   | 35  | 0 | seq |
| .....cuccacaagacacuuguuCu.....                                                                                     | 1   | 1 | seq |
| .....cuccacaagacacuugGuuuc.....                                                                                    | 1   | 1 | seq |
| .....cuccacaagacGcuuguuuuc.....                                                                                    | 1   | 1 | seq |
| .....cuccacaagacacuuguuCu.....                                                                                     | 3   | 1 | seq |
| .....cuccacaagacacuuguuuucu.....                                                                                   | 2   | 0 | seq |
| .....cuccacaagacacuuguuuucC.....                                                                                   | 1   | 1 | seq |
| .....cuccacaagacacuuguuuucuuU.....                                                                                 | 1   | 1 | seq |
| .....ucugAaccuagagaacaagug.....                                                                                    | 2   | 1 | seq |
| .....ugAaccuagagaacaagug.....                                                                                      | 1   | 1 | seq |
| .....agUgaacaagugucuuauugga.....                                                                                   | 1   | 1 | seq |
| .....agagaacaagugucuuauuggaAgu.....                                                                                | 1   | 1 | seq |
| .....agaacaagugucuuauugga.....                                                                                     | 8   | 0 | seq |
| .....agaacaagugucuuauuggaAgu.....                                                                                  | 1   | 1 | seq |
| .....gaacaagugucuuauugga.....                                                                                      | 2   | 0 | seq |
| .....gaacaagugucuuauuggaAgu.....                                                                                   | 29  | 1 | seq |
| .....caagugucuuauuggGugu.....                                                                                      | 1   | 1 | seq |
| .....aagugucuuauuggGugu.....                                                                                       | 4   | 1 | seq |
| .....aagugucuuauuggGuguu.....                                                                                      | 2   | 1 | seq |
| .....aagugucuuauuggaAguug.....                                                                                     | 2   | 1 | seq |
| .....aagugucuuauuggGuguug.....                                                                                     | 45  | 1 | seq |
| .....aagugucuuauuggaAguuga.....                                                                                    | 1   | 1 | seq |
| .....aagugucuuauuggGuguuga.....                                                                                    | 5   | 1 | seq |
| .....aagugucuuauuggGuguugag.....                                                                                   | 102 | 1 | seq |
| .....aagugucuuauuggaAguugag.....                                                                                   | 16  | 1 | seq |
| .....aagugucuuauuggauguugaga.....                                                                                  | 2   | 0 | seq |
| .....aagugucuuauuggGuguugaga.....                                                                                  | 905 | 1 | seq |
| .....aagugucuuauuggGuguugagag.....                                                                                 | 2   | 1 | seq |
| .....aagugucuuauuggGuguugagagu.....                                                                                | 1   | 1 | seq |
| .....agugucuuauuggGuguuga.....                                                                                     | 2   | 1 | seq |
| .....agugucuuauuggGuguugag.....                                                                                    | 24  | 1 | seq |
| .....agugucuuauuggaCguugaga.....                                                                                   | 19  | 1 | seq |
| .....agugucuuauuggGuguugaga.....                                                                                   | 127 | 1 | seq |
| .....agugucuuauuggaAguugaga.....                                                                                   | 2   | 1 | seq |
| .....gugucuuauuggGuguuga.....                                                                                      | 1   | 1 | seq |
| .....gugucuuauuggGuguugaga.....                                                                                    | 1   | 1 | seq |
| .....gugucuuauuggaCguugagag.....                                                                                   | 3   | 1 | seq |
| .....ugucuuauuggGuguugag.....                                                                                      | 2   | 1 | seq |
| .....ucuuauuggaCguugagagua.....                                                                                    | 1   | 1 | seq |
| .....ucuuauuggaCguugagaguaa.....                                                                                   | 2   | 1 | seq |
| .....uuauuggaAguugagagu.....                                                                                       | 1   | 1 | seq |

Provisional ID : MA\_51222\_8811  
Score total : 1  
Score for star read(s) : -1.3  
Score for read counts : 0  
Score for mfe : 0.7  
Score for randfold : 1.6  
Score for cons. seed :  
Total read count : 62  
Mature read count : 62  
Loop read count : 0  
Star read count : 0

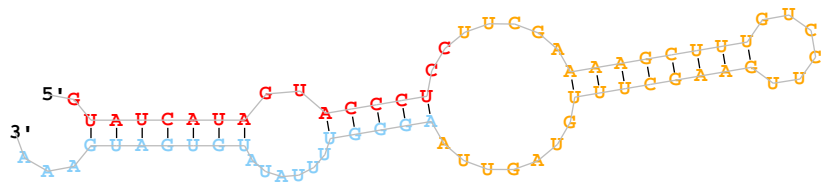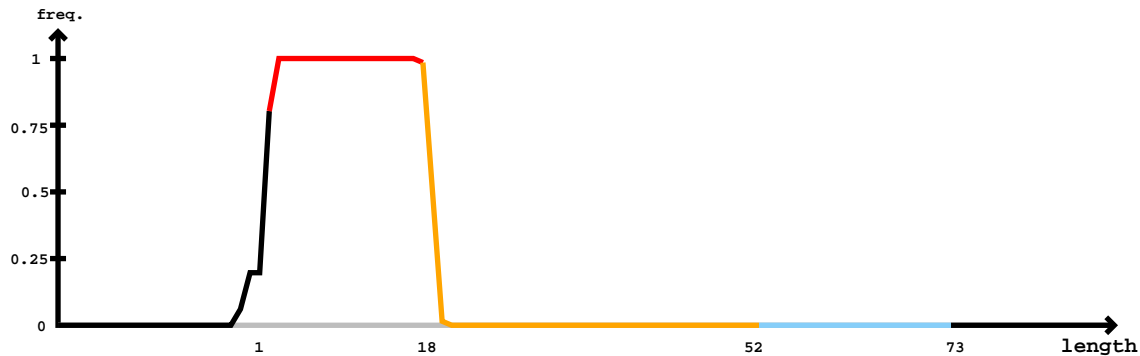

**Mature**

**Star**

| 5'                                                                                 |                                                                                                                           | -3'   | exp |        |  |
|------------------------------------------------------------------------------------|---------------------------------------------------------------------------------------------------------------------------|-------|-----|--------|--|
| uacauauaccccuugagguu                                                               | guauc <u>auagu</u> acc <u>ccu</u> ucgaaaagcuuuguccuugaagcuuugua <u>guua</u> aggguuuuauaugugaugaa <u>cca</u> aguaaugggauuu |       |     |        |  |
| .....(((.(((.((((.((((.((((.(.....((((((.....))))))))......)))))......))))).)).... |                                                                                                                           | reads | mm  | sample |  |
| .....guGguauc <u>auagu</u> acc <u>ccu</u> .....                                    |                                                                                                                           | 4     | 1   | seq    |  |
| .....uAguaucauag <u>u</u> acc <u>cuc</u> .....                                     |                                                                                                                           | 1     | 1   | seq    |  |
| .....uGguauc <u>auagu</u> acc <u>ccu</u> .....                                     |                                                                                                                           | 8     | 1   | seq    |  |
| .....guauc <u>auagu</u> acc <u>cuc</u> U.....                                      |                                                                                                                           | 2     | 1   | seq    |  |
| .....guauc <u>auagu</u> acc <u>ccu</u> .....                                       |                                                                                                                           | 33    | 0   | seq    |  |
| .....guauc <u>auagu</u> acc <u>ccu</u> .....                                       |                                                                                                                           | 4     | 0   | seq    |  |
| .....guauc <u>auagu</u> acc <u>ccu</u> CA.....                                     |                                                                                                                           | 1     | 1   | seq    |  |
| .....uaucauag <u>u</u> acc <u>ccu</u> CA.....                                      |                                                                                                                           | 2     | 1   | seq    |  |
| .....uaucauag <u>u</u> acc <u>ccu</u> CG.....                                      |                                                                                                                           | 1     | 1   | seq    |  |
| .....uaucauag <u>u</u> acc <u>ccu</u> .....                                        |                                                                                                                           | 9     | 0   | seq    |  |
| .....uaucauag <u>u</u> acc <u>ccu</u> Cu.....                                      |                                                                                                                           | 1     | 1   | seq    |  |

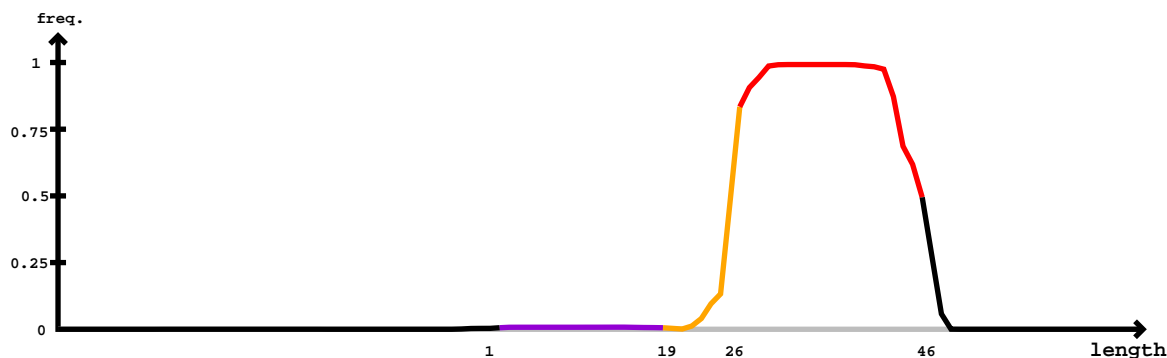

Star                      Mature

| 5' -                                                                                                                                                                                                              | -3'   | obs |        |
|-------------------------------------------------------------------------------------------------------------------------------------------------------------------------------------------------------------------|-------|-----|--------|
|                                                                                                                                                                                                                   |       | exp |        |
| aaugc <u>auugg</u> gauuccaucagaa <u>cu</u> augc <u>aa</u> uaagc <u>guuuu</u> ugg <u>gcuagag</u> uagc <u>ac</u> u <u>ggga</u> ucgg <u>u</u> agccu <u>cccg</u> gaaguccuaguguuuuac <u>augc</u> uuauuggc <u>auuuu</u> |       |     |        |
| aaugc <u>auugg</u> gauuccaucagaa <u>cu</u> augc <u>aa</u> uaagc <u>guuuu</u> ugg <u>gcuagag</u> uagc <u>ac</u> u <u>gggu</u> agccu <u>cccg</u> gaaguccuaguguuuuac <u>augc</u> uuauuggc <u>auuuu</u>               |       |     |        |
| ..(((((((.(.(((.....)))))))))).(((((((.....(.((((((.....(.((((((.....(.)))))))))).(.).)))))).(.).)))))).....                                                                                                      | reads | mm  | sample |
| .....gauuccaucagaa <u>cu</u> .....                                                                                                                                                                                | 1     | 1   | seq    |
| .....uu <u>ggg</u> cuagag <u>uag</u> ca <u>c</u> .....                                                                                                                                                            | 1     | 0   | seq    |
| .....uu <u>ggg</u> cuagag <u>uag</u> ca <u>c</u> .....                                                                                                                                                            | 4     | 0   | seq    |
| .....uu <u>ggg</u> cuagag <u>uag</u> ca <u>c</u> g.....                                                                                                                                                           | 1     | 0   | seq    |
| .....uu <u>ggg</u> cuagG <u>guag</u> ca <u>c</u> g.....                                                                                                                                                           | 1     | 1   | seq    |
| .....uu <u>ggg</u> cuagagCagca <u>c</u> u <u>gg</u> .....                                                                                                                                                         | 1     | 1   | seq    |
| .....uu <u>ggg</u> cuagag <u>uag</u> ca <u>c</u> u <u>gg</u> .....                                                                                                                                                | 1     | 0   | seq    |
| .....uu <u>ggg</u> cuagag <u>uag</u> ca <u>c</u> u <u>ggg</u> .....                                                                                                                                               | 3     | 0   | seq    |
| .....uu <u>ggg</u> cuagag <u>uag</u> ca <u>c</u> u <u>ggga</u> .....                                                                                                                                              | 3     | 0   | seq    |
| .....uu <u>ggg</u> cuagag <u>uag</u> Uac <u>ugggga</u> uc <u>g</u> .....                                                                                                                                          | 1     | 1   | seq    |
| .....u <u>ggg</u> cuagag <u>uag</u> ca <u>c</u> .....                                                                                                                                                             | 6     | 0   | seq    |
| .....u <u>ggg</u> cuagag <u>uag</u> ca <u>c</u> A.....                                                                                                                                                            | 1     | 1   | seq    |
| .....u <u>ggg</u> cuagag <u>uag</u> ca <u>c</u> C.....                                                                                                                                                            | 2     | 1   | seq    |
| .....u <u>ggg</u> cuagag <u>uag</u> ca <u>c</u> g.....                                                                                                                                                            | 7     | 0   | seq    |
| .....u <u>ggg</u> cuagag <u>uag</u> ca <u>c</u> u <u>gg</u> .....                                                                                                                                                 | 3     | 0   | seq    |
| .....u <u>ggg</u> cuagag <u>uag</u> ca <u>c</u> u <u>ggga</u> .....                                                                                                                                               | 1     | 1   | seq    |
| .....u <u>ggg</u> cuagag <u>uag</u> ca <u>c</u> u <u>ggg</u> .....                                                                                                                                                | 1     | 0   | seq    |
| .....u <u>ggg</u> cuagag <u>uag</u> ca <u>c</u> u <u>ggga</u> .....                                                                                                                                               | 7     | 0   | seq    |
| .....u <u>ggg</u> cuagag <u>uag</u> ca <u>c</u> u <u>ggggau</u> .....                                                                                                                                             | 5     | 0   | seq    |
| .....u <u>ggg</u> cuagag <u>uag</u> ca <u>c</u> u <u>gggga</u> G.....                                                                                                                                             | 1     | 1   | seq    |
| .....u <u>ggg</u> cuagag <u>uag</u> Uac <u>ugggga</u> uc <u>g</u> .....                                                                                                                                           | 2     | 1   | seq    |
| .....u <u>ggg</u> cuagag <u>uag</u> Uac <u>ugggga</u> uc <u>gg</u> .....                                                                                                                                          | 1     | 1   | seq    |
| .....u <u>ggg</u> cuagag <u>uag</u> ca <u>c</u> u <u>gggga</u> UG <u>ggug</u> accu <u>cccg</u> gaag <u>u</u> .....                                                                                                | 1     | 1   | seq    |
| .....g <u>gg</u> cuagag <u>uag</u> ca <u>c</u> u <u>g</u> .....                                                                                                                                                   | 2     | 0   | seq    |
| .....g <u>gg</u> cuagag <u>uag</u> ca <u>c</u> u <u>gg</u> .....                                                                                                                                                  | 1     | 0   | seq    |
| .....g <u>gg</u> cuagag <u>uag</u> ca <u>c</u> u <u>ggg</u> .....                                                                                                                                                 | 1     | 0   | seq    |
| .....g <u>gg</u> cuagag <u>uag</u> ca <u>c</u> u <u>ggga</u> .....                                                                                                                                                | 2     | 0   | seq    |
| .....g <u>gg</u> cuagag <u>uag</u> ca <u>c</u> u <u>ggga</u> C.....                                                                                                                                               | 1     | 1   | seq    |
| .....g <u>gc</u> uagag <u>uag</u> ca <u>c</u> u <u>ggga</u> .....                                                                                                                                                 | 2     | 0   | seq    |
| .....g <u>cuag</u> G <u>guag</u> ca <u>c</u> u <u>ggg</u> .....                                                                                                                                                   | 1     | 1   | seq    |
| .....g <u>cuag</u> ag <u>uag</u> ca <u>c</u> u <u>ggg</u> .....                                                                                                                                                   | 4     | 0   | seq    |
| .....g <u>cuag</u> agCagca <u>c</u> u <u>ggga</u> .....                                                                                                                                                           | 1     | 1   | seq    |
| .....g <u>cuag</u> ag <u>uag</u> ca <u>c</u> u <u>ggg</u> U.....                                                                                                                                                  | 1     | 1   | seq    |

## Star

## Mature

|                                                                          |                                              |   |     |  |
|--------------------------------------------------------------------------|----------------------------------------------|---|-----|--|
| aaugcauugggauuccaucagaacuaugcaauuaagcguuuuugggcuagagugagcacugggauucgguga | ccuccccgggaaguccuaguguuuuacaugcuuaugggcauuuu |   |     |  |
| .....gcuagagugagcacugggga.....                                           | 28                                           | 0 | seq |  |
| .....gcuagGguagcacugggga.....                                            | 3                                            | 1 | seq |  |
| .....gcuagagAagcacugggga.....                                            | 1                                            | 1 | seq |  |
| .....gcuagagugagcacuggggau.....                                          | 3                                            | 0 | seq |  |
| .....gcuagagugagcacuggggaC.....                                          | 3                                            | 1 | seq |  |
| .....gcuagagugagcacuggggauGggugaccucccggggaaguccuagug.....               | 1                                            | 1 | seq |  |
| .....cuagagugagcacugggga.....                                            | 18                                           | 0 | seq |  |
| .....cuagGguagcacugggga.....                                             | 8                                            | 1 | seq |  |
| .....cuagagugagcacuggggau.....                                           | 2                                            | 0 | seq |  |
| .....cuagagugagUacuggggaucggugaccuccc.....                               | 1                                            | 1 | seq |  |
| .....cuagagugagcacuggggauGggugaccucccggaagucc.....                       | 1                                            | 1 | seq |  |
| .....cuagagugagcacuggggauGggugaccucccggaaguccu.....                      | 1                                            | 1 | seq |  |
| .....uagagugagcacuggggau.....                                            | 1                                            | 0 | seq |  |
| .....uagagugagcacuggggauGggugaccucccggaaguccuagu.....                    | 2                                            | 1 | seq |  |
| .....gUacuggggaucggugaccucccggaaguccuagug.....                           | 1                                            | 1 | seq |  |
| .....acuggggauUggugaccu.....                                             | 2                                            | 1 | seq |  |
| .....acuggggauUggugaccuc.....                                            | 1                                            | 1 | seq |  |
| .....cuggggauUggugaccuc.....                                             | 2                                            | 1 | seq |  |
| .....ggugaccucccggaag.....                                               | 13                                           | 0 | seq |  |
| .....Ugugaccucccggaagu.....                                              | 1                                            | 1 | seq |  |
| .....ggugaccucccggaagu.....                                              | 27                                           | 0 | seq |  |
| .....gAugaccucccggaaguc.....                                             | 1                                            | 1 | seq |  |
| .....ggugaccucccggaaguc.....                                             | 12                                           | 0 | seq |  |
| .....ggugaccucccggaagucc.....                                            | 4                                            | 0 | seq |  |
| .....ggCgaccucccggaaguccu.....                                           | 1                                            | 1 | seq |  |
| .....ggugaccucccggaaguccu.....                                           | 13                                           | 0 | seq |  |
| .....ggugaccucccggaaguccua.....                                          | 9                                            | 0 | seq |  |
| .....ggugaccucccggaaguccuag.....                                         | 3                                            | 0 | seq |  |
| .....ggugaccucccggaaguccuagu.....                                        | 12                                           | 0 | seq |  |
| .....ggGgaccucccggaaguccuagug.....                                       | 1                                            | 1 | seq |  |
| .....ggugaccucccggaaguccuagug.....                                       | 59                                           | 0 | seq |  |
| .....ggugaccucccggaagCccuagug.....                                       | 1                                            | 1 | seq |  |
| .....ggugaccucccggaaguccuagugu.....                                      | 25                                           | 0 | seq |  |
| .....ggugaccucccggaaguccuagugA.....                                      | 1                                            | 1 | seq |  |
| .....Cgugaccucccggaaguccuaguguu.....                                     | 1                                            | 1 | seq |  |
| .....ggugaccucccggaaguccuaguguu.....                                     | 24                                           | 0 | seq |  |
| .....gugaccucccggaagA.....                                               | 1                                            | 1 | seq |  |
| .....gugaccucccggaagu.....                                               | 53                                           | 0 | seq |  |
| .....Uugaccucccggaagu.....                                               | 1                                            | 1 | seq |  |
| .....gugaccucccggaaguG.....                                              | 1                                            | 1 | seq |  |
| .....gugaccucccggaaguc.....                                              | 14                                           | 0 | seq |  |
| .....gugaccucccggaagucc.....                                             | 17                                           | 0 | seq |  |
| .....gugaccucccggaaguccu.....                                            | 16                                           | 0 | seq |  |
| .....gugaccucccggaGguccua.....                                           | 1                                            | 1 | seq |  |
| .....gugaccucccggaaguccua.....                                           | 57                                           | 0 | seq |  |
| .....gugaccucccggaaguccGa.....                                           | 1                                            | 1 | seq |  |
| .....gugaccucccggaaguccuag.....                                          | 12                                           | 0 | seq |  |
| .....gugaccucccggaGguccuagu.....                                         | 1                                            | 1 | seq |  |
| .....gugaccuccUggaaguccuagu.....                                         | 1                                            | 1 | seq |  |
| .....gugaccucccggaaguccuagu.....                                         | 19                                           | 0 | seq |  |
| .....gugaccucGcggaaguccuagug.....                                        | 1                                            | 1 | seq |  |
| .....gugaccucccggaaguccuagug.....                                        | 138                                          | 0 | seq |  |
| .....gugaccucccggaGguccuagug.....                                        | 1                                            | 1 | seq |  |
| .....Nugaccucccggaaguccuagugu.....                                       | 1                                            | 1 | seq |  |
| .....gugaccucccggaaguccuagugA.....                                       | 1                                            | 1 | seq |  |
| .....gugaccucccggaaguccuagugu.....                                       | 59                                           | 0 | seq |  |
| .....guUaccucccggaaguccuagugu.....                                       | 1                                            | 1 | seq |  |
| .....gugaccucccggaagCccuaguguu.....                                      | 1                                            | 1 | seq |  |
| .....gugaccucccggaaguccuaguguu.....                                      | 135                                          | 0 | seq |  |
| .....gugacAucccggaaguccuaguguu.....                                      | 1                                            | 1 | seq |  |
| .....ugaccucccggaaguc.....                                               | 30                                           | 0 | seq |  |
| .....ugaccucccggaagucc.....                                              | 58                                           | 0 | seq |  |
| .....ugaccucccggaaguccu.....                                             | 113                                          | 0 | seq |  |
| .....ugaccucccggaaguccG.....                                             | 6                                            | 1 | seq |  |
| .....ugaccuccGgggaaguccu.....                                            | 1                                            | 1 | seq |  |
| .....ugaccucccggaaguccuC.....                                            | 2                                            | 1 | seq |  |
| .....ugaccuccGgggaaguccua.....                                           | 1                                            | 1 | seq |  |
| .....ugaccucccggaaguccua.....                                            | 105                                          | 0 | seq |  |
| .....Ggaccucccggaaguccua.....                                            | 1                                            | 1 | seq |  |
| .....ugaccucccggaaguccuag.....                                           | 53                                           | 0 | seq |  |

## Star

## Mature

|                                                                   |                                                       |   |     |  |
|-------------------------------------------------------------------|-------------------------------------------------------|---|-----|--|
| aaugcauugggauuccaucagaacuaugcaauuaagcguuuuugggcuagagugagcacugggau | cccgguagaccucccccggaaguccuaguguuuuacaugcuuauuggcauuuu |   |     |  |
| .....uAaccucccggaaguccuag.....                                    | 1                                                     | 1 | seq |  |
| .....ugaccucccggaaguccuagu.....                                   | 105                                                   | 0 | seq |  |
| .....ugaccucGcggaaguccuagug.....                                  | 1                                                     | 1 | seq |  |
| .....ugaccucccggaagCccuagug.....                                  | 2                                                     | 1 | seq |  |
| .....ugUccucccggaaguccuagug.....                                  | 1                                                     | 1 | seq |  |
| .....uUaccucccggaaguccuagug.....                                  | 1                                                     | 1 | seq |  |
| .....ugCccucccggaaguccuagug.....                                  | 1                                                     | 1 | seq |  |
| .....Agaccucccggaaguccuagug.....                                  | 1                                                     | 1 | seq |  |
| .....ugaccucccggaaguccuagug.....                                  | 374                                                   | 0 | seq |  |
| .....ugaccucccggaaguccuagugu.....                                 | 130                                                   | 0 | seq |  |
| .....ugaccucccggaaguccuagugA.....                                 | 3                                                     | 1 | seq |  |
| .....ugaccucccggaagCccuagugu.....                                 | 1                                                     | 1 | seq |  |
| .....ugaccucccggaaguccuaguguu.....                                | 41                                                    | 0 | seq |  |
| .....ugaccucccggaaguccuaguguuC.....                               | 1                                                     | 1 | seq |  |
| .....ugaccucccggaaguccuaguguuu.....                               | 1                                                     | 0 | seq |  |
| .....gaccucccggaagucc.....                                        | 91                                                    | 0 | seq |  |
| .....gaGcucccggaagucc.....                                        | 1                                                     | 1 | seq |  |
| .....Caccucccggaaguccu.....                                       | 1                                                     | 1 | seq |  |
| .....gUccucccggaaguccu.....                                       | 1                                                     | 1 | seq |  |
| .....gaccucccggaaguccG.....                                       | 7                                                     | 1 | seq |  |
| .....gaccucccggaaguccu.....                                       | 134                                                   | 0 | seq |  |
| .....Aaccucccggaaguccua.....                                      | 1                                                     | 1 | seq |  |
| .....gaccucccggaaguccua.....                                      | 1                                                     | 1 | seq |  |
| .....gaccucccggaaguccuC.....                                      | 1                                                     | 1 | seq |  |
| .....gaccucccggaaguccua.....                                      | 98                                                    | 0 | seq |  |
| .....Caccucccggaaguccua.....                                      | 2                                                     | 1 | seq |  |
| .....Naccucccggaaguccuag.....                                     | 1                                                     | 1 | seq |  |
| .....gaccucccggaaguccuag.....                                     | 18                                                    | 0 | seq |  |
| .....gCccucccggaaguccuag.....                                     | 1                                                     | 1 | seq |  |
| .....Caccucccggaaguccuag.....                                     | 1                                                     | 1 | seq |  |
| .....gaccucccggaaguccuagu.....                                    | 55                                                    | 0 | seq |  |
| .....Naccucccggaaguccuagug.....                                   | 1                                                     | 1 | seq |  |
| .....gaccucccggaaguccuagug.....                                   | 179                                                   | 0 | seq |  |
| .....gaccucccggaagGccuagugu.....                                  | 1                                                     | 1 | seq |  |
| .....gaccucccggaaguccuagugu.....                                  | 79                                                    | 0 | seq |  |
| .....Caccucccggaaguccuagugu.....                                  | 1                                                     | 1 | seq |  |
| .....gaccucccggaaguccuaguguu.....                                 | 20                                                    | 0 | seq |  |
| .....gaccucccggaCguccuaguguu.....                                 | 1                                                     | 1 | seq |  |
| .....Cccucccggaaguccu.....                                        | 1                                                     | 1 | seq |  |
| .....Uccucccggaaguccu.....                                        | 1                                                     | 1 | seq |  |
| .....accucccggaaguccG.....                                        | 66                                                    | 1 | seq |  |
| .....accucccggaagGccu.....                                        | 2                                                     | 1 | seq |  |
| .....accucccggaagAccu.....                                        | 1                                                     | 1 | seq |  |
| .....accucccggaagCccu.....                                        | 8                                                     | 1 | seq |  |
| .....accucccggaaguccu.....                                        | 1552                                                  | 0 | seq |  |
| .....accucccggaaguccuC.....                                       | 1                                                     | 1 | seq |  |
| .....accucccggaaguccua.....                                       | 1258                                                  | 0 | seq |  |
| .....accucccggaaguccGa.....                                       | 2                                                     | 1 | seq |  |
| .....aAucccggaaguccua.....                                        | 1                                                     | 1 | seq |  |
| .....accucccggaagGcu.....                                         | 1                                                     | 1 | seq |  |
| .....Cccucccggaaguccua.....                                       | 2                                                     | 1 | seq |  |
| .....acAucccggaaguccua.....                                       | 1                                                     | 1 | seq |  |
| .....accucccggaagCccua.....                                       | 4                                                     | 1 | seq |  |
| .....Nccucccggaaguccua.....                                       | 3                                                     | 1 | seq |  |
| .....accucGcggaaguccua.....                                       | 1                                                     | 1 | seq |  |
| .....Nccucccggaaguccuag.....                                      | 1                                                     | 1 | seq |  |
| .....accucccggaagGccuag.....                                      | 1                                                     | 1 | seq |  |
| .....accuAccggaaguccuag.....                                      | 2                                                     | 1 | seq |  |
| .....accucccggaaguccuag.....                                      | 450                                                   | 0 | seq |  |
| .....accucccggaagCccuag.....                                      | 1                                                     | 1 | seq |  |
| .....accuccAgggaaguccuag.....                                     | 1                                                     | 1 | seq |  |
| .....accucccggaaguccuagu.....                                     | 772                                                   | 0 | seq |  |
| .....accuccAgggaaguccuagu.....                                    | 1                                                     | 1 | seq |  |
| .....Nccucccggaaguccuagu.....                                     | 3                                                     | 1 | seq |  |
| .....accucccggaagAccuagu.....                                     | 2                                                     | 1 | seq |  |
| .....accucccggaUguccuagu.....                                     | 1                                                     | 1 | seq |  |
| .....accucccggaagCccuagu.....                                     | 3                                                     | 1 | seq |  |
| .....accucccggaaguccuagug.....                                    | 1731                                                  | 0 | seq |  |
| .....Nccucccggaaguccuagug.....                                    | 1                                                     | 1 | seq |  |
| .....Cccucccggaaguccuagug.....                                    | 1                                                     | 1 | seq |  |



## Star

## Mature

aaugcauugggauuccaucagaacuaugcaauuaagcguuuuugggcuagagugagcacugggaucgguga

|                                   |      |   |     |
|-----------------------------------|------|---|-----|
| .....accucccggaagCccuagug.....    | 1    | 1 | seq |
| .....accucccggaagAccuagug.....    | 1    | 1 | seq |
| .....Uccucccggaaguccuagug.....    | 2    | 1 | seq |
| .....accuccGgggaaguccuagug.....   | 1    | 1 | seq |
| .....aAcucccggaaguccuagug.....    | 1    | 1 | seq |
| .....accucccggaagGcuagugu.....    | 1    | 1 | seq |
| .....accucccggaaguccuagugu.....   | 441  | 0 | seq |
| .....accuccAgggaaguccuagugu.....  | 1    | 1 | seq |
| .....accucccggaaguccuagugA.....   | 6    | 1 | seq |
| .....accAccccggaaguccuaguguu..... | 1    | 1 | seq |
| .....accucccggaaguccuaguguu.....  | 210  | 0 | seq |
| .....accucccggaagGccuaguguu.....  | 1    | 1 | seq |
| .....Cccucccggaaguccuaguguu.....  | 1    | 1 | seq |
| .....accucccggaaguccuaguguuC..... | 1    | 1 | seq |
| .....ccucccggaagGccua.....        | 2    | 1 | seq |
| .....ccucccgGCaaguccua.....       | 1    | 1 | seq |
| .....Gcucccggaaguccua.....        | 5    | 1 | seq |
| .....ccucccggaagCccua.....        | 3    | 1 | seq |
| .....Acucccggaaguccua.....        | 4    | 1 | seq |
| .....ccucccggaaguccua.....        | 1915 | 0 | seq |
| .....ccucccggaaguccGa.....        | 4    | 1 | seq |
| .....ccucccggaaguccuC.....        | 2    | 1 | seq |
| .....Ncucccggaaguccua.....        | 1    | 1 | seq |
| .....ccucccggaaguccuag.....       | 620  | 0 | seq |
| .....ccucccggaaguccuGg.....       | 1    | 1 | seq |
| .....Gcucccggaaguccuag.....       | 2    | 1 | seq |
| .....ccucccggaagCccuag.....       | 1    | 1 | seq |
| .....ccucccggaaguccGag.....       | 1    | 1 | seq |
| .....ccucccggaaguccuagu.....      | 925  | 0 | seq |
| .....ccucccggaagCccuagu.....      | 4    | 1 | seq |
| .....ccucccggaaguccGuagu.....     | 1    | 1 | seq |
| .....ccucccggaUguccuagu.....      | 1    | 1 | seq |
| .....ccucccggaaguccuagu.....      | 1    | 1 | seq |
| .....ccuAcccggaaguccuagu.....     | 1    | 1 | seq |
| .....ccucccggaagAccuagu.....      | 1    | 1 | seq |
| .....ccuGcggaaguccuagu.....       | 1    | 1 | seq |
| .....ccucccggaaguccGagug.....     | 2    | 1 | seq |
| .....Ncucccggaaguccuagug.....     | 4    | 1 | seq |
| .....ccucccggaaguccuagug.....     | 1930 | 0 | seq |
| .....ccucccggaagAccuagug.....     | 1    | 1 | seq |
| .....Gcucccggaaguccuagug.....     | 2    | 1 | seq |
| .....ccucccggaagCccuagug.....     | 3    | 1 | seq |
| .....ccucccggaCguccuagug.....     | 1    | 1 | seq |
| .....ccucccggaagGccuagug.....     | 2    | 1 | seq |
| .....ccucccggaaguccGagugu.....    | 2    | 1 | seq |
| .....ccucccggaagAccuagugu.....    | 1    | 1 | seq |
| .....Acucccggaaguccuagugu.....    | 2    | 1 | seq |
| .....ccAcccggaaguccuagugu.....    | 1    | 1 | seq |
| .....ccucccggaagCccuagugu.....    | 1    | 1 | seq |
| .....ccucccggaaguccuagugu.....    | 858  | 0 | seq |
| .....ccucccggaUguccuagugu.....    | 1    | 1 | seq |
| .....Gcucccggaaguccuagugu.....    | 1    | 1 | seq |
| .....ccucccggaaguccuagugA.....    | 9    | 1 | seq |
| .....ccuccUggaaguccuaguguu.....   | 1    | 1 | seq |
| .....ccucccggaagCccuaguguu.....   | 1    | 1 | seq |
| .....Ncucccggaaguccuaguguu.....   | 1    | 1 | seq |
| .....ccucccggaaguccuaguguu.....   | 294  | 0 | seq |
| .....ccucccggaaguccuaguguuC.....  | 1    | 1 | seq |
| .....cucccggaagAccuag.....        | 1    | 1 | seq |
| .....cucccggaaguccuag.....        | 104  | 0 | seq |
| .....cucccggaaguccuagu.....       | 229  | 0 | seq |
| .....cuccAgggaaguccuagug.....     | 1    | 1 | seq |
| .....cucccggaagCccuagug.....      | 2    | 1 | seq |
| .....Nucccggaaguccuagug.....      | 2    | 1 | seq |
| .....cucccggaaguccuagug.....      | 785  | 0 | seq |
| .....cucccggaaguccuagugu.....     | 137  | 0 | seq |
| .....cucccggaaguccuagugA.....     | 3    | 1 | seq |
| .....cucccggaaguccuaguguu.....    | 87   | 0 | seq |
| .....ucccggaaguccuagu.....        | 178  | 0 | seq |
| .....Ncccggaaguccuagu.....        | 1    | 1 | seq |

Star

Mature

|                                                                                                                |     |   |     |
|----------------------------------------------------------------------------------------------------------------|-----|---|-----|
| aaugcauuggauuccaucagaacuaugcaauuaagcguuuuugggcuagagugacacugggaucggugaccucccggaaguccuaguguuuuacaugcuuauggcauuuu |     |   |     |
| .....ucccggaagGccuagu.....                                                                                     | 1   | 1 | seq |
| .....ucccggaaguccuagug.....                                                                                    | 1   | 1 | seq |
| .....ucccggaaguccuagug.....                                                                                    | 311 | 0 | seq |
| .....ucccggaaguccuagug.....                                                                                    | 1   | 1 | seq |
| .....ucccggaaguccuagug.....                                                                                    | 133 | 0 | seq |
| .....ucccggaaguccuagugA.....                                                                                   | 3   | 1 | seq |
| .....ucccggaaguccuaguguu.....                                                                                  | 83  | 0 | seq |
| .....Acccggaaguccuaguguu.....                                                                                  | 1   | 1 | seq |
| .....ucccggaaguccuagugCuu.....                                                                                 | 1   | 1 | seq |
| .....cccggaaguccuagug.....                                                                                     | 392 | 0 | seq |
| .....Gccggaaguccuagug.....                                                                                     | 2   | 1 | seq |
| .....cccggaaguccuagug.....                                                                                     | 286 | 0 | seq |
| .....Acccggaaguccuagug.....                                                                                    | 1   | 1 | seq |
| .....cccggaaguccuagGgu.....                                                                                    | 2   | 1 | seq |
| .....cccggaaguccuaguguu.....                                                                                   | 120 | 0 | seq |
| .....cccggaagAccuaguguu.....                                                                                   | 1   | 1 | seq |
| .....ccggaaguccuagug.....                                                                                      | 58  | 0 | seq |
| .....ccggaaguccuaguguu.....                                                                                    | 37  | 0 | seq |
| .....cgggaaguccuaguguu.....                                                                                    | 13  | 0 | seq |

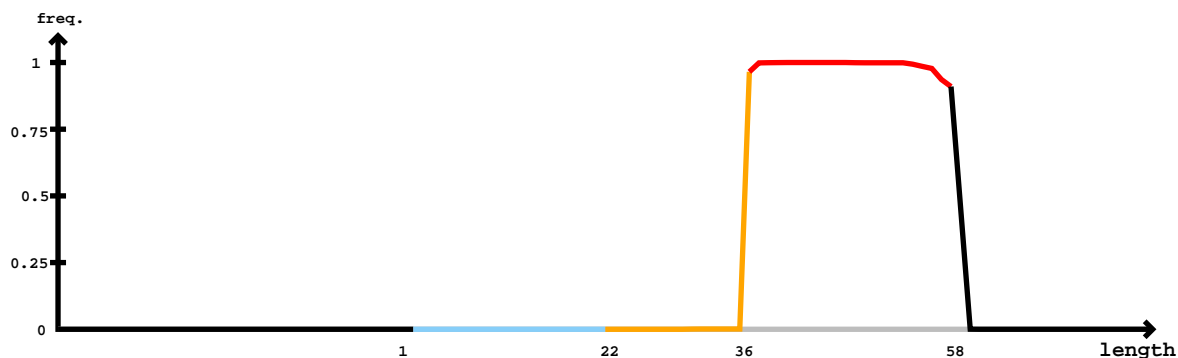

## Mature

[illegible]

## Star

## Mature

|                                                           |                                                         |   |     |  |
|-----------------------------------------------------------|---------------------------------------------------------|---|-----|--|
| ucucagaaauaacugaauccuuauaggguaguggaauaggguagaagucgaaagacc | ucuuuccaggggcgguuuuccacuuuacccauuuccgcuauuucacuaagugaac |   |     |  |
| .....uuuuuccacuuuacccaCuuc.....                           | 6                                                       | 1 | seq |  |
| .....uuuuuccacuuuacccauuCc.....                           | 21                                                      | 1 | seq |  |
| .....uuuuuccacuuuacccauuuA.....                           | 9                                                       | 1 | seq |  |
| .....Cuuuuccacuuuacccauuuc.....                           | 7                                                       | 1 | seq |  |
| .....ucuuuccacCucuacccauuuc.....                          | 4                                                       | 1 | seq |  |
| .....Acuuuuccacuuuacccauuuc.....                          | 1                                                       | 1 | seq |  |
| .....ucuuuccacuuUuacccauuuc.....                          | 3                                                       | 1 | seq |  |
| .....ucuuuccacuuuacccauuuc.....                           | 2010                                                    | 0 | seq |  |
| .....ucuuuccacuuuacccUauuuc.....                          | 1                                                       | 1 | seq |  |
| .....Gcuuuccacuuuacccauuuc.....                           | 4                                                       | 1 | seq |  |
| .....ucuuuccacuuGuacccauuuc.....                          | 1                                                       | 1 | seq |  |
| .....ucCuuccacuuuacccauuuc.....                           | 8                                                       | 1 | seq |  |
| .....uAuuccacuuuacccauuuc.....                            | 2                                                       | 1 | seq |  |
| .....ucuuuccacuuuacccGuuuc.....                           | 2                                                       | 1 | seq |  |
| .....ucuCuuccacuuuacccauuuc.....                          | 4                                                       | 1 | seq |  |
| .....ucuuuccacuuuacccauuuc.....                           | 1                                                       | 1 | seq |  |
| .....ucuuuccacuuuacccauGuc.....                           | 1                                                       | 1 | seq |  |
| .....ucuuuccacuuuacccauuAc.....                           | 1                                                       | 1 | seq |  |
| .....ucuuuccacuuuacccauuuU.....                           | 31                                                      | 1 | seq |  |
| .....ucAuuccacuuuacccauuuc.....                           | 1                                                       | 1 | seq |  |
| .....ucuuuccacuuuacccauuGc.....                           | 1                                                       | 1 | seq |  |
| .....ucuuuccaUuuuacccauuuc.....                           | 2                                                       | 1 | seq |  |
| .....ucuuuccacuuuacccauuuc.....                           | 1                                                       | 1 | seq |  |
| .....ucuuuccGcuuacccauuuc.....                            | 4                                                       | 1 | seq |  |
| .....ucuuuccacuuCacccauuuc.....                           | 3                                                       | 1 | seq |  |
| .....ucuuuccacuuuGcccauuuc.....                           | 6                                                       | 1 | seq |  |
| .....ucuuuccacuuuacccauuucU.....                          | 33                                                      | 1 | seq |  |
| .....ucuuuccacuuuacccauuuAc.....                          | 2                                                       | 1 | seq |  |
| .....ucuuuccacuuuacccauuuucc.....                         | 7                                                       | 0 | seq |  |
| .....ucuuuccacuuuacccauuuuA.....                          | 3                                                       | 1 | seq |  |
| .....ucuuuccacuuuacccauuuuG.....                          | 1                                                       | 1 | seq |  |
| .....ucuuuccacuuuacccauuuUc.....                          | 3                                                       | 1 | seq |  |
| .....ucuuuucUacuuccacccauuucc.....                        | 1                                                       | 1 | seq |  |
| .....ucuuuccacuuuacccauuuuccC.....                        | 1                                                       | 1 | seq |  |
| .....cuuuccacuuuacccG.....                                | 2                                                       | 1 | seq |  |
| .....cuuuccacuuuacccau.....                               | 1                                                       | 0 | seq |  |
| .....cuuucUacuuccacccauu.....                             | 1                                                       | 1 | seq |  |
| .....Uuuuccacuuuacccauu.....                              | 1                                                       | 1 | seq |  |
| .....cuuuccacuuuacccauu.....                              | 1                                                       | 0 | seq |  |
| .....Uuuuccacuuuacccauuuc.....                            | 19                                                      | 1 | seq |  |
| .....cuuuccacuuuacccauuCc.....                            | 1                                                       | 1 | seq |  |
| .....cuuuccacGucuacccauuuc.....                           | 1                                                       | 1 | seq |  |
| .....cuuuccacuuuacccauuuc.....                            | 67                                                      | 0 | seq |  |
| .....cuuuccacCucuacccauuuc.....                           | 1                                                       | 1 | seq |  |
| .....cuuuccacuuuacccauuuuA.....                           | 1                                                       | 1 | seq |  |
| .....cuuuccacuuuacccauuuU.....                            | 2                                                       | 1 | seq |  |
| .....uuuccacuuuacccauuuc.....                             | 2                                                       | 0 | seq |  |
| .....uuccacuuuacccauu.....                                | 1                                                       | 0 | seq |  |
| .....uccacuuuacccauuC.....                                | 1                                                       | 1 | seq |  |

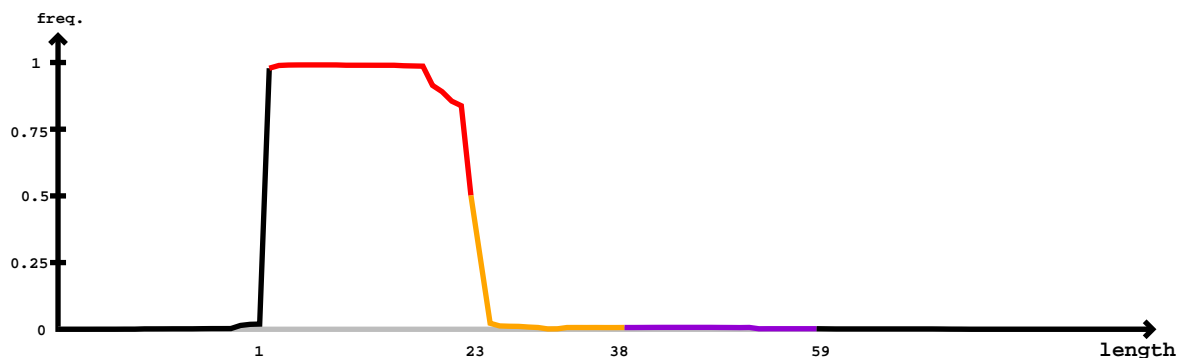

Star

[illegible]

## Mature

## Star

|                                           |                     |                    |                                                      |     |   |     |
|-------------------------------------------|---------------------|--------------------|------------------------------------------------------|-----|---|-----|
| aagcgcgagcguguuauugucguccg                | uccgggcccacgaugguuu | augaucgucuaaggauuu | cagaaccacguggcccgagagaagaauaccucgcguuugguuauaucgauuu |     |   |     |
| .....ucgucUggggccacgaugguu.....           |                     |                    |                                                      | 2   | 1 | seq |
| .....ucguccggggccacgauggCu.....           |                     |                    |                                                      | 1   | 1 | seq |
| .....ucguccggggccacgaugguC.....           |                     |                    |                                                      | 1   | 1 | seq |
| .....Acguccggggccacgaugguu.....           |                     |                    |                                                      | 1   | 1 | seq |
| .....ucguccggggccacgauggCuu.....          |                     |                    |                                                      | 1   | 1 | seq |
| .....ucguccggggccacgaugguuG.....          |                     |                    |                                                      | 2   | 1 | seq |
| .....ucguccggggccacgaugguuu.....          |                     |                    |                                                      | 102 | 0 | seq |
| .....ucguccggggccaUgaugguuu.....          |                     |                    |                                                      | 1   | 1 | seq |
| .....ucguGcggggccacgaugguuu.....          |                     |                    |                                                      | 1   | 1 | seq |
| .....ucCuccggggccacgaugguuu.....          |                     |                    |                                                      | 1   | 1 | seq |
| .....ucguccggggccacgaugguuC.....          |                     |                    |                                                      | 11  | 1 | seq |
| .....ucguccggggccacgaCguuuu.....          |                     |                    |                                                      | 1   | 1 | seq |
| .....ucguccggggccacgaugguuuC.....         |                     |                    |                                                      | 2   | 1 | seq |
| .....ucguccggggccacgaugguua.....          |                     |                    |                                                      | 1   | 0 | seq |
| .....ucguccggggccacgaugguuuauaucgCua..... |                     |                    |                                                      | 1   | 1 | seq |
| .....cguccggggccacgaugg.....              |                     |                    |                                                      | 3   | 0 | seq |
| .....cguccggggccacgauggu.....             |                     |                    |                                                      | 5   | 0 | seq |
| .....cAuccggggccacgaugguu.....            |                     |                    |                                                      | 1   | 1 | seq |
| .....cguccggggccacgaugguu.....            |                     |                    |                                                      | 3   | 0 | seq |
| .....cgucUggggccacgaugguu.....            |                     |                    |                                                      | 44  | 1 | seq |
| .....cgucUggggccacgaugguuu.....           |                     |                    |                                                      | 2   | 1 | seq |
| .....cguccggggccacgaugguuuauaucgCua.....  |                     |                    |                                                      | 1   | 1 | seq |
| .....guccggggccacgauggC.....              |                     |                    |                                                      | 1   | 1 | seq |
| .....guccggggccacgauggu.....              |                     |                    |                                                      | 3   | 0 | seq |
| .....guccggggccacgaugguu.....             |                     |                    |                                                      | 2   | 0 | seq |
| .....Auccggggccacgaugguuuauug.....        |                     |                    |                                                      | 1   | 1 | seq |
| .....Cuuccggggccacgaugguuuauug.....       |                     |                    |                                                      | 1   | 1 | seq |
| .....Cuuccggggccacgaugguuuauuga.....      |                     |                    |                                                      | 1   | 1 | seq |
| .....guccggggccacgaugguuuauaucg.....      |                     |                    |                                                      | 1   | 0 | seq |
| .....guccggggccacgaugguuuauaucgC.....     |                     |                    |                                                      | 1   | 1 | seq |
| .....guccggggccacgaugguuuauaucgCua.....   |                     |                    |                                                      | 1   | 1 | seq |
| .....uccggggccacgaugguA.....              |                     |                    |                                                      | 7   | 1 | seq |
| .....uccggggccacgauggGu.....              |                     |                    |                                                      | 1   | 1 | seq |
| .....uGcggggccacgaugguu.....              |                     |                    |                                                      | 1   | 1 | seq |
| .....uccgggUcacgaugguu.....               |                     |                    |                                                      | 1   | 1 | seq |
| .....Accggggccacgaugguu.....              |                     |                    |                                                      | 1   | 1 | seq |
| .....uccggggccacgGugguu.....              |                     |                    |                                                      | 1   | 1 | seq |
| .....Nccggggccacgaugguu.....              |                     |                    |                                                      | 2   | 1 | seq |
| .....uccggggccacgaCguu.....               |                     |                    |                                                      | 1   | 1 | seq |
| .....uccggggccacgaugguG.....              |                     |                    |                                                      | 15  | 1 | seq |
| .....uccggggccGcgaugguu.....              |                     |                    |                                                      | 3   | 1 | seq |
| .....uccggggccUcgaugguu.....              |                     |                    |                                                      | 1   | 1 | seq |
| .....uccggggcUacgaugguu.....              |                     |                    |                                                      | 2   | 1 | seq |
| .....uccggggccacgaugguu.....              |                     |                    |                                                      | 785 | 0 | seq |
| .....uccggggccaUgaugguu.....              |                     |                    |                                                      | 2   | 1 | seq |
| .....uccggggccacgaugguC.....              |                     |                    |                                                      | 120 | 1 | seq |
| .....uccggggccacgauggAu.....              |                     |                    |                                                      | 3   | 1 | seq |
| .....uccggggccacgaGguu.....               |                     |                    |                                                      | 1   | 1 | seq |
| .....Cccggggccacgaugguu.....              |                     |                    |                                                      | 1   | 1 | seq |
| .....uccggggccacgauggCu.....              |                     |                    |                                                      | 4   | 1 | seq |
| .....uccggggccacAaugguu.....              |                     |                    |                                                      | 1   | 1 | seq |
| .....Gccggggccacgaugguu.....              |                     |                    |                                                      | 2   | 1 | seq |
| .....uUcggggccacgaugguu.....              |                     |                    |                                                      | 1   | 1 | seq |
| .....Accggggccacgaugguuu.....             |                     |                    |                                                      | 2   | 1 | seq |
| .....uccggggccacgaugguuC.....             |                     |                    |                                                      | 21  | 1 | seq |
| .....uccggggccacgaugguuu.....             |                     |                    |                                                      | 172 | 0 | seq |
| .....uUcggggccacgaugguuu.....             |                     |                    |                                                      | 1   | 1 | seq |
| .....uccggggccacgaugguuG.....             |                     |                    |                                                      | 1   | 1 | seq |
| .....uccggggccacgaugguuuu.....            |                     |                    |                                                      | 470 | 0 | seq |
| .....uccggggccacgaugguuuC.....            |                     |                    |                                                      | 1   | 1 | seq |
| .....uccggggccacgaugguuuU.....            |                     |                    |                                                      | 3   | 1 | seq |
| .....Cccggggccacgaugguuuu.....            |                     |                    |                                                      | 1   | 1 | seq |
| .....uccggggccacgaugguGua.....            |                     |                    |                                                      | 1   | 1 | seq |
| .....uccggggccGcgaugguuuu.....            |                     |                    |                                                      | 2   | 1 | seq |
| .....uccggggccaUgaugguuuu.....            |                     |                    |                                                      | 1   | 1 | seq |
| .....uccggggccacgaugguCua.....            |                     |                    |                                                      | 1   | 1 | seq |
| .....Accggggccacgaugguuuu.....            |                     |                    |                                                      | 1   | 1 | seq |
| .....uccggggccacgaugguuGa.....            |                     |                    |                                                      | 2   | 1 | seq |
| .....uccggggccacgaUguuuu.....             |                     |                    |                                                      | 1   | 1 | seq |
| .....uccggggccacgaugguuCa.....            |                     |                    |                                                      | 2   | 1 | seq |

Star

|                       |                          |                  |                        |                                  |      |   |     |
|-----------------------|--------------------------|------------------|------------------------|----------------------------------|------|---|-----|
| aagcgcagcguguuauugucg | uccggggccacgaugguuuau    | gaucgucuaaggauuu | cagaaaccacguggcccuagcg | agaagaauaccucgcuuugguuuauucgauuu |      |   |     |
| .....                 | uccggggccacgaugguCua     | u                |                        |                                  | 1    | 1 | seq |
| .....                 | .Accggggccacgaugguuuau   |                  |                        |                                  | 1    | 1 | seq |
| .....                 | uccggggccacgGugguuuau    |                  |                        |                                  | 1    | 1 | seq |
| .....                 | uccggggccacgaugguuuau    |                  |                        |                                  | 202  | 0 | seq |
| .....                 | uccggggccacgaugguuuUu    |                  |                        |                                  | 1    | 1 | seq |
| .....                 | uccggggccacgaCgguuuau    |                  |                        |                                  | 1    | 1 | seq |
| .....                 | uccggggccacgaugguuuGu    |                  |                        |                                  | 2    | 1 | seq |
| .....                 | uccggggccacgaugguuuuA    |                  |                        |                                  | 1    | 1 | seq |
| .....                 | uccCggccacgaugguuuau     |                  |                        |                                  | 1    | 1 | seq |
| .....                 | uccggggccacgaugguuuuAC   |                  |                        |                                  | 30   | 1 | seq |
| .....                 | uccggggccacAaugguuuauug  |                  |                        |                                  | 5    | 1 | seq |
| .....                 | uccggggccacgaugguuuauU   |                  |                        |                                  | 23   | 1 | seq |
| .....                 | uccggggccCcgauugguuuauug |                  |                        |                                  | 2    | 1 | seq |
| .....                 | uccgggCccacgaugguuuauug  |                  |                        |                                  | 1    | 1 | seq |
| .....                 | uccggggccacgauggAuuaug   |                  |                        |                                  | 2    | 1 | seq |
| .....                 | uccggggccacgaGgguuuauug  |                  |                        |                                  | 2    | 1 | seq |
| .....                 | uccggggccacgaugguGuauug  |                  |                        |                                  | 3    | 1 | seq |
| .....                 | uccCggccacgaugguuuauug   |                  |                        |                                  | 2    | 1 | seq |
| .....                 | uccggggccacgCugguuuauug  |                  |                        |                                  | 1    | 1 | seq |
| .....                 | uccggggccacgaugguuuauug  |                  |                        |                                  | 4360 | 0 | seq |
| .....                 | uccggggccacgaugAuuuauug  |                  |                        |                                  | 7    | 1 | seq |
| .....                 | .Accggggccacgaugguuuauug |                  |                        |                                  | 7    | 1 | seq |
| .....                 | uccggggccacgaugguuuuACg  |                  |                        |                                  | 32   | 1 | seq |
| .....                 | uccggggccacgaCgguuuauug  |                  |                        |                                  | 5    | 1 | seq |
| .....                 | uccgAgccacgaugguuuauug   |                  |                        |                                  | 5    | 1 | seq |
| .....                 | uccggggccGcgauugguuuauug |                  |                        |                                  | 12   | 1 | seq |
| .....                 | uccggggccacgUugguuuauug  |                  |                        |                                  | 1    | 1 | seq |
| .....                 | uccggggcUacgaugguuuauug  |                  |                        |                                  | 2    | 1 | seq |
| .....                 | uccAgggccacgaugguuuauug  |                  |                        |                                  | 1    | 1 | seq |
| .....                 | uccggggUcacgaugguuuauug  |                  |                        |                                  | 3    | 1 | seq |
| .....                 | uccggggccacCaugguuuauug  |                  |                        |                                  | 1    | 1 | seq |
| .....                 | .Gccggggccacgaugguuuauug |                  |                        |                                  | 5    | 1 | seq |
| .....                 | uAcggggccacgaugguuuauug  |                  |                        |                                  | 2    | 1 | seq |
| .....                 | uccggggccacgaugguuuGug   |                  |                        |                                  | 12   | 1 | seq |
| .....                 | uGcgggggccacgaugguuuauug |                  |                        |                                  | 2    | 1 | seq |
| .....                 | ucGggggccacgaugguuuauug  |                  |                        |                                  | 3    | 1 | seq |
| .....                 | .Cccggggccacgaugguuuauug |                  |                        |                                  | 11   | 1 | seq |
| .....                 | uccggggccacgauggGuauug   |                  |                        |                                  | 6    | 1 | seq |
| .....                 | uccggggccUcgauugguuuauug |                  |                        |                                  | 7    | 1 | seq |
| .....                 | uUcgggggccacgaugguuuauug |                  |                        |                                  | 4    | 1 | seq |
| .....                 | uccgCgccacgaugguuuauug   |                  |                        |                                  | 1    | 1 | seq |
| .....                 | uccggggccacgauAguuuauug  |                  |                        |                                  | 6    | 1 | seq |
| .....                 | .Nccggggccacgaugguuuauug |                  |                        |                                  | 10   | 1 | seq |
| .....                 | uccggggccacgaugguuuUug   |                  |                        |                                  | 1    | 1 | seq |
| .....                 | uccggggccacgaugguuuuAag  |                  |                        |                                  | 2    | 1 | seq |
| .....                 | uccggggcAacgaugguuuauug  |                  |                        |                                  | 1    | 1 | seq |
| .....                 | uccggggccacgGugguuuauug  |                  |                        |                                  | 16   | 1 | seq |
| .....                 | uccggggccacgauggCuuaug   |                  |                        |                                  | 9    | 1 | seq |
| .....                 | ucUggggccacgaugguuuauug  |                  |                        |                                  | 3    | 1 | seq |
| .....                 | uccggggccacgaugguCuauug  |                  |                        |                                  | 11   | 1 | seq |
| .....                 | uccggggccacgaugguuuuAC   |                  |                        |                                  | 10   | 1 | seq |
| .....                 | uccggggccacgaugguuuAGg   |                  |                        |                                  | 17   | 1 | seq |
| .....                 | uccggggccaUgaugguuuauug  |                  |                        |                                  | 4    | 1 | seq |
| .....                 | uccggggccacgaugguuCaug   |                  |                        |                                  | 5    | 1 | seq |
| .....                 | uccggggccacgaugguuuuAA   |                  |                        |                                  | 117  | 1 | seq |
| .....                 | uccggggUcacgaugguuuauuga |                  |                        |                                  | 5    | 1 | seq |
| .....                 | uccggggccacgaugguuCauga  |                  |                        |                                  | 6    | 1 | seq |
| .....                 | ucUggggccacgaugguuuauuga |                  |                        |                                  | 8    | 1 | seq |
| .....                 | uccggggccaUgaugguuuauuga |                  |                        |                                  | 6    | 1 | seq |
| .....                 | uccggggccaAgaugguuuauuga |                  |                        |                                  | 1    | 1 | seq |
| .....                 | uccggggcUacgaugguuuauuga |                  |                        |                                  | 7    | 1 | seq |
| .....                 | uccAgggccacgaugguuuauuga |                  |                        |                                  | 6    | 1 | seq |
| .....                 | uccggggccacgaugguuuauuga |                  |                        |                                  | 5874 | 0 | seq |
| .....                 | uccggggccacgaugguuuGuga  |                  |                        |                                  | 11   | 1 | seq |
| .....                 | uccCggccacgaugguuuauuga  |                  |                        |                                  | 1    | 1 | seq |
| .....                 | uccggggccacgauAguuuauuga |                  |                        |                                  | 8    | 1 | seq |
| .....                 | uccggggccacgaugguuuuAA   |                  |                        |                                  | 2    | 1 | seq |
| .....                 | uccggggccacgaugguuuauUa  |                  |                        |                                  | 4    | 1 | seq |
| .....                 | uccggggccacgGugguuuauuga |                  |                        |                                  | 21   | 1 | seq |
| .....                 | uccggggccacgaGgguuuauuga |                  |                        |                                  | 4    | 1 | seq |

## Mature

## Star

aagcgcgagcguguuauugucguccggggccacgauggguuuaua~~ucgucua~~gggauguucagaaccaccguggcccgagagaagaauaccucgcguuugguuauaucgauuu

|                                            |     |   |     |
|--------------------------------------------|-----|---|-----|
| .....uccggggccacgauUguuuuaua.....          | 1   | 1 | seq |
| .....uccggggccacgauggguuuauCa.....         | 3   | 1 | seq |
| .....Cccggggccacgauggguuuaua.....          | 18  | 1 | seq |
| .....uccggggccacgaugguCuauga.....          | 10  | 1 | seq |
| .....uccggggccacgauggguuuAGga.....         | 3   | 1 | seq |
| .....uccggggccCcgauuggguuuaua.....         | 2   | 1 | seq |
| .....ucGggggccacgauggguuuaua.....          | 1   | 1 | seq |
| .....Accggggccacgauggguuuaua.....          | 4   | 1 | seq |
| .....uccggggccacgaugAuuuaua.....           | 3   | 1 | seq |
| .....uccggggccacgaAgguuuuaua.....          | 2   | 1 | seq |
| .....uccggggccacgauggAuuaua.....           | 5   | 1 | seq |
| .....uccggggccacUauggguuuaua.....          | 3   | 1 | seq |
| .....uccggggccacgUuggguuuaua.....          | 1   | 1 | seq |
| .....uccggggccacgauggGuuaua.....           | 13  | 1 | seq |
| .....uccggggccGcgauuggguuuaua.....         | 21  | 1 | seq |
| .....uccUggggccacgauggguuuaua.....         | 3   | 1 | seq |
| .....uccggggccacgauggguuuauG.....          | 140 | 1 | seq |
| .....uccggggccacgauggguuuACga.....         | 8   | 1 | seq |
| .....uccggggccacgCuggguuuaua.....          | 1   | 1 | seq |
| .....uUcggggccacgauggguuuaua.....          | 5   | 1 | seq |
| .....uccgGggccacgauggguuuaua.....          | 2   | 1 | seq |
| .....uccggggccacgaugUuuuaua.....           | 1   | 1 | seq |
| .....uccggggccacgaCgguuuaua.....           | 7   | 1 | seq |
| .....uccgAgccacgauggguuuaua.....           | 3   | 1 | seq |
| .....uNcggggccacgauggguuuaua.....          | 1   | 1 | seq |
| .....uccggggccacAauggguuuaua.....          | 5   | 1 | seq |
| .....uccgUggccacgauggguuuaua.....          | 2   | 1 | seq |
| .....uccggggccacCauggguuuaua.....          | 1   | 1 | seq |
| .....uccggggccacgauggguuuauGU.....         | 58  | 1 | seq |
| .....uccggggccUcgauuggguuuaua.....         | 3   | 1 | seq |
| .....uccggggccacgaugguAuauga.....          | 2   | 1 | seq |
| .....uccggggccacgauggCuuauga.....          | 12  | 1 | seq |
| .....uccggggccacgauggguuuCuaga.....        | 3   | 1 | seq |
| .....Gccggggccacgauggguuuaua.....          | 10  | 1 | seq |
| .....uccggggccacgauggguuuauG.....          | 11  | 1 | seq |
| .....Nccggggccacgauggguuuaua.....          | 12  | 1 | seq |
| .....uccggggccacgauggguuuauaGA.....        | 114 | 1 | seq |
| .....uccggggccacgauggguuuauaGG.....        | 32  | 1 | seq |
| .....uccCGggccacgauggguuuauaGau.....       | 1   | 1 | seq |
| .....uccggggccacgauggguuuauaGC.....        | 89  | 1 | seq |
| .....uccggggccacgaugguuGaugau.....         | 1   | 1 | seq |
| .....uccggggccacgGuggguuuauaGau.....       | 1   | 1 | seq |
| .....uccggggccacgauggguuuauUau.....        | 1   | 1 | seq |
| .....ucUggggccacgauggguuuauaGau.....       | 1   | 1 | seq |
| .....uccggggccacgauggguuuauaGau.....       | 165 | 0 | seq |
| .....uccggggccacAauggguuuauaGau.....       | 1   | 1 | seq |
| .....uccggggccacgauAguuuuauaGau.....       | 1   | 1 | seq |
| .....uccggggccacgauggguuuauGUu.....        | 2   | 1 | seq |
| .....uccggggccacgauggguuuauaGAc.....       | 22  | 1 | seq |
| .....uccggggccacgauggguuuauaGauA.....      | 8   | 1 | seq |
| .....uccggggccacgauggguuuACgauc.....       | 1   | 1 | seq |
| .....uccggggccacgauggguuuauaGc.....        | 2   | 1 | seq |
| .....ucAggggccacgauggguuuauaGauc.....      | 1   | 1 | seq |
| .....uccggggccacgauggguuuauaGauc.....      | 35  | 0 | seq |
| .....uccggggccacgGuggguuuauaGauc.....      | 1   | 1 | seq |
| .....uccggggccacgauggguuuauaGU.....        | 23  | 1 | seq |
| .....uccggggccacgauggguuuauaGU.....        | 2   | 1 | seq |
| .....uccggggccacgauggguuuauaGcC.....       | 26  | 1 | seq |
| .....uccggggccacgauggguuuauGUc.....        | 1   | 1 | seq |
| .....uccggggccacgauggguuuauaGcG.....       | 1   | 1 | seq |
| .....uccggggccacgauggguuuauaGaucC.....     | 3   | 1 | seq |
| .....uccggggccacgauggguuuauaGaucg.....     | 6   | 0 | seq |
| .....uccggggccacgauggguuuauaGauAg.....     | 1   | 1 | seq |
| .....uccggggccacgauggguuuauaGaucAu.....    | 1   | 1 | seq |
| .....uccggggccacgauggguuuauaGaucgu.....    | 1   | 0 | seq |
| .....uccggggccacgauggguuuauaGaucgC.....    | 2   | 1 | seq |
| .....uccggggccacgauggguuuauaGaucgCc.....   | 13  | 1 | seq |
| .....uccggggccacgauggguuuauaGaucgCcu.....  | 14  | 1 | seq |
| .....uccggggccacgauggguuuauaGaucgCcua..... | 32  | 1 | seq |



## Mature

## Star

|                                 |                         |                 |             |                 |                    |                     |  |  |  |
|---------------------------------|-------------------------|-----------------|-------------|-----------------|--------------------|---------------------|--|--|--|
| aagcgcguguguuauugucguc          | ccggggccacgauggguuu     | augaucgucua     | agggauguuc  | agaaccacgcgugcc | cgagagaagaauaccucg | ccuuugguuauaucgauuu |  |  |  |
| .....uccggggccacgauggguuu       | augaucgCcu              | agggaug.....    | 1           | 1               | seq                |                     |  |  |  |
| .....uccggggccacgauggguuu       | augaucgCcu              | agggaugu.....   | 1           | 1               | seq                |                     |  |  |  |
| .....ccggggccacgauggguuC.....   |                         |                 | 2           | 1               | seq                |                     |  |  |  |
| .....ccggggccacgauggguuu.....   |                         |                 | 12          | 0               | seq                |                     |  |  |  |
| .....ccggggccacgauggguuuA.....  |                         |                 | 13          | 0               | seq                |                     |  |  |  |
| .....ccggggccacgauggguuuA.....  |                         |                 | 1           | 1               | seq                |                     |  |  |  |
| .....ccggggccacgauggguuuau..... |                         |                 | 2           | 0               | seq                |                     |  |  |  |
| .....ccggggccacgaugggCuu        | aug.....                |                 | 1           | 1               | seq                |                     |  |  |  |
| .....ccggggccacgauggguuu        | aug.....                |                 | 12          | 0               | seq                |                     |  |  |  |
| .....ccggggccacgauggguuuA.....  |                         |                 | 2           | 1               | seq                |                     |  |  |  |
| .....ccggggccacgauggguuu        | auga.....               |                 | 21          | 0               | seq                |                     |  |  |  |
| .....ccggggccacgauggguuu        | augau.....              |                 | 2           | 0               | seq                |                     |  |  |  |
| .....ccggggccacgauggguuu        | augauc.....             |                 | 9           | 0               | seq                |                     |  |  |  |
| .....ccggggccacgauggguuu        | augauU.....             |                 | 1           | 1               | seq                |                     |  |  |  |
| .....ccggggccacgauggguuu        | augauA.....             |                 | 1           | 1               | seq                |                     |  |  |  |
| .....ccggggccacgauggguuu        | augaucg.....            |                 | 4           | 0               | seq                |                     |  |  |  |
| .....ccggggccacgauggguuu        | augaucgC.....           |                 | 2           | 1               | seq                |                     |  |  |  |
| .....ccggggccacgauggguuu        | augaucgCc.....          |                 | 15          | 1               | seq                |                     |  |  |  |
| .....ccggggccacgauggguuu        | augaucgCcu.....         |                 | 7           | 1               | seq                |                     |  |  |  |
| .....ccggggccacgauggguuu        | augaucgCcua.....        |                 | 38          | 1               | seq                |                     |  |  |  |
| .....ccggggccacgauggguuu        | augaucgCcu              | agggau.....     | 1           | 1               | seq                |                     |  |  |  |
| .....cggggccacgauggguuuA.....   |                         |                 | 1           | 0               | seq                |                     |  |  |  |
| .....cggggccacgauggguuu         | aug.....                |                 | 2           | 0               | seq                |                     |  |  |  |
| .....cggggccacgauggguuu         | auga.....               |                 | 1           | 0               | seq                |                     |  |  |  |
| .....cggggccacgauggguuu         | augau.....              |                 | 1           | 0               | seq                |                     |  |  |  |
| .....cggggccacgauggguuu         | augauc.....             |                 | 4           | 0               | seq                |                     |  |  |  |
| .....cggggccacgaCgguuu          | augauc.....             |                 | 1           | 1               | seq                |                     |  |  |  |
| .....cggggccacgauggguuu         | augaucgCc.....          |                 | 4           | 1               | seq                |                     |  |  |  |
| .....cggggccacgauggguuu         | augaucgCcu.....         |                 | 2           | 1               | seq                |                     |  |  |  |
| .....cggggccacgauggguuu         | augaucgCcua.....        |                 | 5           | 1               | seq                |                     |  |  |  |
| .....cggggccacgauggguuu         | augaucgCcu              | agg.....        | 2           | 1               | seq                |                     |  |  |  |
| .....ggAccacgauggguuu           | augauc.....             |                 | 2           | 1               | seq                |                     |  |  |  |
| .....ggAccacgauggguuu           | augaucguc.....          |                 | 2           | 1               | seq                |                     |  |  |  |
| .....ggggccacgauggguuu          | augaucgCc.....          |                 | 1           | 1               | seq                |                     |  |  |  |
| .....ggccacgauggguuu            | auga.....               |                 | 1           | 0               | seq                |                     |  |  |  |
| .....ggccacgauggguuu            | augaucgCcu.....         |                 | 1           | 1               | seq                |                     |  |  |  |
| .....gccacgauggguuu             | augaucgCcu.....         |                 | 1           | 1               | seq                |                     |  |  |  |
| .....ccacgauggguuu              | augauc.....             |                 | 1           | 0               | seq                |                     |  |  |  |
| .....ccacgauggguuu              | augaucgCc.....          |                 | 1           | 1               | seq                |                     |  |  |  |
| .....acgauggguuu                | augaucguUu              | agg.....        | 1           | 1               | seq                |                     |  |  |  |
| .....uggguuu                    | augaucgucua             | agggaug.....    | 1           | 0               | seq                |                     |  |  |  |
| .....uggguuu                    | augaucgucua             | Agaug.....      | 1           | 1               | seq                |                     |  |  |  |
| .....gguuuu                     | augaucgucua             | Agaug.....      | 1           | 1               | seq                |                     |  |  |  |
| .....guuuu                      | augaucgucua             | agggauguu       | cagaac..... | 1               | 0                  | seq                 |  |  |  |
| .....uuu                        | augaucgucua             | agggauguu.....  | c.....      | 1               | 0                  | seq                 |  |  |  |
| .....uu                         | augaucgucua             | agggaugu.....   | c.....      | 1               | 0                  | seq                 |  |  |  |
| .....uu                         | augaucgucua             | agggaugu.....   | c.....      | 1               | 0                  | seq                 |  |  |  |
| .....cgucua                     | agggauguu               | cagaaccacU..... |             | 1               | 1                  | seq                 |  |  |  |
| .....agggaCguu                  | cagaaccaccg.....        |                 |             | 1               | 1                  | seq                 |  |  |  |
| .....agggauguu                  | cagaaccaccgug.....      |                 |             | 1               | 0                  | seq                 |  |  |  |
| .....gggauguu                   | cagaaccacUg.....        |                 |             | 1               | 1                  | seq                 |  |  |  |
| .....gaCguu                     | cagaaccaccg.....        |                 |             | 2               | 1                  | seq                 |  |  |  |
| .....gauguu                     | caAaaccaccg.....        |                 |             | 1               | 1                  | seq                 |  |  |  |
| .....gaCguu                     | cagaaccaccg.....        |                 |             | 1               | 1                  | seq                 |  |  |  |
| .....gaCguu                     | cagaaccaccgug.....      |                 |             | 2               | 1                  | seq                 |  |  |  |
| .....aCguu                      | cagaaccaccgug.....      |                 |             | 1               | 1                  | seq                 |  |  |  |
| .....auguu                      | cagaaccacUcgug.....     |                 |             | 2               | 1                  | seq                 |  |  |  |
| .....auguu                      | cagaaccacUcgugg.....    |                 |             | 1               | 1                  | seq                 |  |  |  |
| .....auguu                      | cagaaccacUcguggc.....   |                 |             | 68              | 1                  | seq                 |  |  |  |
| .....uguu                       | cagaaccacUcguggcc.....  |                 |             | 1               | 1                  | seq                 |  |  |  |
| .....uucaga                     | accacUcguggc.....       |                 |             | 3               | 1                  | seq                 |  |  |  |
| .....uucaga                     | accacUcguggcc.....      |                 |             | 1               | 1                  | seq                 |  |  |  |
| .....aga                        | accaccguggcccAgacg..... |                 |             | 1               | 1                  | seq                 |  |  |  |
| .....aga                        | accaccgCggccugacg.....  |                 |             | 4               | 1                  | seq                 |  |  |  |
| .....aaccaccgCggccugac.....     |                         |                 |             | 1               | 1                  | seq                 |  |  |  |
| .....aaccaccgCggccugacg.....    |                         |                 |             | 2               | 1                  | seq                 |  |  |  |
| .....accaccgCggccugacg.....     |                         |                 |             | 3               | 1                  | seq                 |  |  |  |
| .....ccaccgCggccugacg.....      |                         |                 |             | 2               | 1                  | seq                 |  |  |  |
| .....accguggcccAgacgagaaga..... |                         |                 |             | 1               | 1                  | seq                 |  |  |  |
| .....ccugacgaCaagaauacc.....    |                         |                 |             | 3               | 1                  | seq                 |  |  |  |

Mature

Star

|                                                                                                                        |   |   |     |
|------------------------------------------------------------------------------------------------------------------------|---|---|-----|
| aagcgcgagcguguuauugucguccggggccacgauggguuuaugaucgucuaaggauguucagaaccaccgugggccugacgagaagaauacccucgcgcuuugguuauaucgauuu |   |   |     |
| .....cccAgacgagaagaauacccu.....                                                                                        | 1 | 1 | seq |
| .....cccgacgaCaagaauacccu.....                                                                                         | 5 | 1 | seq |
| .....cugacgaCaagaauacccu.....                                                                                          | 1 | 1 | seq |
| .....cugacgaCaagaauacccuC.....                                                                                         | 1 | 1 | seq |
| .....cugacgaCaagaauacccucg.....                                                                                        | 4 | 1 | seq |

Provisional ID : MA\_5210\_12262  
 Score total : 0.2  
 Score for star read(s) : -1.3  
 Score for read counts : 0  
 Score for mfe : 0  
 Score for randfold : 1.6  
 Score for cons. seed :  
 Total read count : 7382  
 Mature read count : 7382  
 Loop read count : 0  
 Star read count : 0

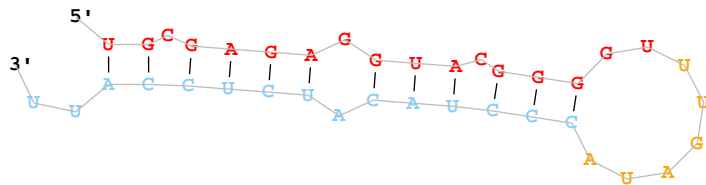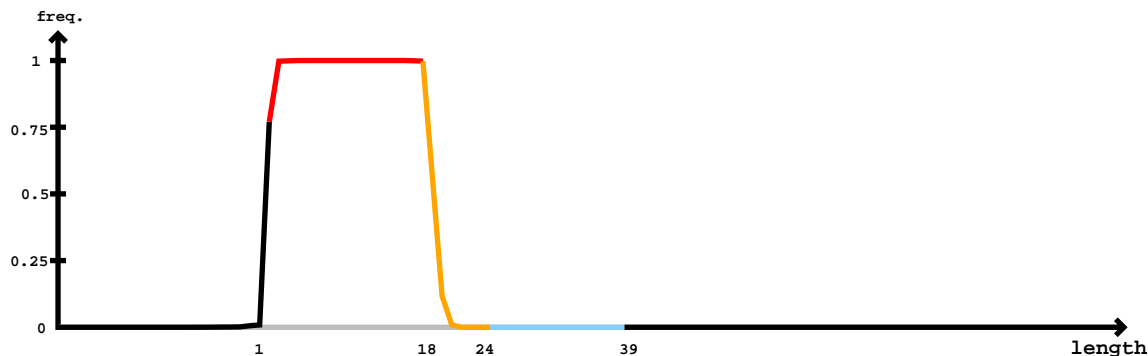

**Mature** **Star**

| 5' - | gguagagcacuugcuugcaugcgagagguacgggguuugauaccuacaucuccauuuucacuuuuuguuaacaaacugauguggaacauccauagauaucauaga | -3'   | exp |        |
|------|-----------------------------------------------------------------------------------------------------------|-------|-----|--------|
|      | .(((((((.....)))))).((.(((.(.(((.....)))))).))))).((.(((.....))))).(((.....)))).....                      | reads | mm  | sample |
|      | .....gcuuugcaugcgagagCuacggggguu.....                                                                     | 1     | 1   | seq    |
|      | .....uuGgcaugcgagagguacgggg.....                                                                          | 1     | 1   | seq    |
|      | .....uugcaugcgagagguacgggggu.....                                                                         | 2     | 0   | seq    |
|      | .....uugcaugcgagagguacgggggu.....                                                                         | 1     | 0   | seq    |
|      | .....ugcaugcgagagguacggggguuu.....                                                                        | 1     | 0   | seq    |
|      | .....gcUugcgagagguacggg.....                                                                              | 1     | 1   | seq    |
|      | .....gcaugcgagagguacggg.....                                                                              | 1     | 0   | seq    |
|      | .....gcaugcgagagguacgggggu.....                                                                           | 1     | 0   | seq    |
|      | .....gcUugcgagagguacgggggu.....                                                                           | 1     | 1   | seq    |
|      | .....gcGugcgagagguacggggguuu.....                                                                         | 1     | 1   | seq    |
|      | .....cUugcgagagguacggg.....                                                                               | 3     | 1   | seq    |
|      | .....caugcgagagguacggg.....                                                                               | 1     | 0   | seq    |
|      | .....cUugcgagagguacgggg.....                                                                              | 1     | 1   | seq    |
|      | .....caugcgagagguacgggg.....                                                                              | 1     | 1   | seq    |
|      | .....caugcgagagguacgggggu.....                                                                            | 2     | 1   | seq    |
|      | .....cUugcgagagguacgggg.....                                                                              | 3     | 0   | seq    |
|      | .....caugcgagagguacgggggu.....                                                                            | 5     | 0   | seq    |
|      | .....cUugcgagagguacgggggu.....                                                                            | 3     | 1   | seq    |
|      | .....caugcgagUgguacgggggu.....                                                                            | 1     | 1   | seq    |
|      | .....caugcgagagguacgggggu.....                                                                            | 3     | 0   | seq    |
|      | .....cUugcgagagguacgggggu.....                                                                            | 5     | 1   | seq    |
|      | .....cGugcgagagguacggggguuu.....                                                                          | 3     | 1   | seq    |
|      | .....caugcgagagguacggggguuu.....                                                                          | 1     | 0   | seq    |
|      | .....augcgagagguacgggg.....                                                                               | 4     | 0   | seq    |
|      | .....augcgagUgguacgggggu.....                                                                             | 1     | 1   | seq    |
|      | .....Uugcgagagguacgggggu.....                                                                             | 2     | 1   | seq    |
|      | .....augcgagagguacgggggu.....                                                                             | 2     | 0   | seq    |
|      | .....Uugcgagagguacgggggu.....                                                                             | 3     | 1   | seq    |
|      | .....Cugcgagagguacgggggu.....                                                                             | 3     | 1   | seq    |
|      | .....Uugcgagagguacggggguuu.....                                                                           | 2     | 1   | seq    |
|      | .....Cugcgagagguacggggguuu.....                                                                           | 2     | 1   | seq    |
|      | .....augcgagagguacggggguuu.....                                                                           | 1     | 0   | seq    |
|      | .....Gugcgagagguacggggguuu.....                                                                           | 1     | 1   | seq    |
|      | .....ugcgagagguacggUgu.....                                                                               | 2     | 1   | seq    |

# Mature Star

|                                                                                                         |      |   |     |
|---------------------------------------------------------------------------------------------------------|------|---|-----|
| ggugagagcacuugcuuugcaugcgagagggguuuugauaccuacaucuccauuuucacuuuuguuaucaaacuugauguggaacaucgauagauaucauaga |      |   |     |
| .....uAcgagagguacgggggu.....                                                                            | 5    | 1 | seq |
| .....ugcgaUagguacgggggu.....                                                                            | 1    | 1 | seq |
| .....ugcgagUggguacgggggu.....                                                                           | 2    | 1 | seq |
| .....ugcgagagCuacgggggu.....                                                                            | 1    | 1 | seq |
| .....ugcgagagguacUgggu.....                                                                             | 2    | 1 | seq |
| .....uCCgagagguacgggggu.....                                                                            | 1    | 1 | seq |
| .....ugcgagaggAacgggggu.....                                                                            | 1    | 1 | seq |
| .....ugcgagagguacgUgggu.....                                                                            | 2    | 1 | seq |
| .....ugcgagagguacggggC.....                                                                             | 352  | 1 | seq |
| .....ugcgagagguGcgggggu.....                                                                            | 7    | 1 | seq |
| .....ugcgagagguacgggggu.....                                                                            | 2163 | 0 | seq |
| .....ugcgagagUuacgggggu.....                                                                            | 1    | 1 | seq |
| .....ugcgagagguUcgggggu.....                                                                            | 3    | 1 | seq |
| .....ugcgagagNuacgggggu.....                                                                            | 1    | 1 | seq |
| .....ugcUagagguacgggggu.....                                                                            | 2    | 1 | seq |
| .....uUcgagagguacgggggu.....                                                                            | 1    | 1 | seq |
| .....ugcgagagguacgggCu.....                                                                             | 4    | 1 | seq |
| .....Ggcgagagguacgggggu.....                                                                            | 3    | 1 | seq |
| .....ugcgagagguacgCggu.....                                                                             | 3    | 1 | seq |
| .....ugcgagagguAagggggu.....                                                                            | 1    | 1 | seq |
| .....Ngcgagagguacgggggu.....                                                                            | 5    | 1 | seq |
| .....ugcgagaUguacgggggu.....                                                                            | 1    | 1 | seq |
| .....Ggcgagagguacgggggu.....                                                                            | 3    | 1 | seq |
| .....ugcgagagguacUggguu.....                                                                            | 2    | 1 | seq |
| .....ugcgagagUuacgggggu.....                                                                            | 2    | 1 | seq |
| .....Ngcgagagguacgggggu.....                                                                            | 2    | 1 | seq |
| .....uAcgagagguacgggggu.....                                                                            | 2    | 1 | seq |
| .....ugcgagaAguacgggggu.....                                                                            | 2    | 1 | seq |
| .....ugcgagagguacggggCu.....                                                                            | 341  | 1 | seq |
| .....ugcgagagguacggggCu.....                                                                            | 25   | 1 | seq |
| .....ugcgagagguacgggggu.....                                                                            | 2091 | 0 | seq |
| .....ugcgagagguacggUguu.....                                                                            | 1    | 1 | seq |
| .....ugcgagaggAacgggggu.....                                                                            | 1    | 1 | seq |
| .....ugcUagagguacgggggu.....                                                                            | 1    | 1 | seq |
| .....ugcgagagguGcgggggu.....                                                                            | 7    | 1 | seq |
| .....ugcgagaUguacgggggu.....                                                                            | 1    | 1 | seq |
| .....ugcgagagguUcgggggu.....                                                                            | 2    | 1 | seq |
| .....ugcgagUggguacgggggu.....                                                                           | 1    | 1 | seq |
| .....ugcgagagguacggggguA.....                                                                           | 34   | 1 | seq |
| .....ugcgagagguacggggguuu.....                                                                          | 376  | 0 | seq |
| .....ugcgagagCuacggggguuu.....                                                                          | 1    | 1 | seq |
| .....Ggcgagagguacggggguuu.....                                                                          | 1    | 1 | seq |
| .....uAcgagagguacggggguuu.....                                                                          | 2    | 1 | seq |
| .....ugcgagagguacggggguuA.....                                                                          | 103  | 1 | seq |
| .....ugcgagUggguacggggguuu.....                                                                         | 1    | 1 | seq |
| .....ugcgagagguacggggCu.....                                                                            | 2    | 1 | seq |
| .....ugcgagagguacgUggguuu.....                                                                          | 1    | 1 | seq |
| .....ugcgagGggguacggggguuu.....                                                                         | 2    | 1 | seq |
| .....ugcgagaggGacggggguuu.....                                                                          | 2    | 1 | seq |
| .....Cgcgagagguacggggguuu.....                                                                          | 1    | 1 | seq |
| .....ugcgGgagguacggggguuu.....                                                                          | 1    | 1 | seq |
| .....ugUgagagguacggggguuu.....                                                                          | 1    | 1 | seq |
| .....Ngcgagagguacggggguuu.....                                                                          | 2    | 1 | seq |
| .....ugcgagagguacggggGu.....                                                                            | 2    | 1 | seq |
| .....ugcgagagguacggggGuCu.....                                                                          | 8    | 1 | seq |
| .....ugcgagagguacggggguuuC.....                                                                         | 1    | 1 | seq |
| .....ugcgagagguacggggguuug.....                                                                         | 30   | 0 | seq |
| .....Agcgagagguacggggguuug.....                                                                         | 1    | 1 | seq |
| .....ugcgagagguacggggGuuug.....                                                                         | 1    | 1 | seq |
| .....ugcgagagguacggggCuug.....                                                                          | 1    | 1 | seq |
| .....ugcgagagguacggggguuAg.....                                                                         | 6    | 1 | seq |
| .....ugcgagaggGacggggguuug.....                                                                         | 1    | 1 | seq |
| .....gCgagagCuacgggggu.....                                                                             | 1    | 1 | seq |
| .....gCgagagguacUggguu.....                                                                             | 1    | 1 | seq |
| .....gCgagagguacggggguA.....                                                                            | 24   | 1 | seq |
| .....gCgagagguacgggggu.....                                                                             | 1149 | 0 | seq |
| .....Ucgagagguacgggggu.....                                                                             | 3    | 1 | seq |
| .....gCgagagguacggggCu.....                                                                             | 14   | 1 | seq |
| .....gCgagUggguacgggggu.....                                                                            | 1    | 1 | seq |
| .....gCgagagguacggggGuC.....                                                                            | 193  | 1 | seq |

# Mature Star

|                                                                                                              |     |   |     |
|--------------------------------------------------------------------------------------------------------------|-----|---|-----|
| gguaagagcacuugcuuugcaugcgagagguacggggguuugauaccuacauccauuuucacuuuuguuaucaaacuugauguggaacauccauagauauaucauaga |     |   |     |
| .....Acgagagguacggggguu.....                                                                                 | 3   | 1 | seq |
| .....gcgagaggAacggggguu.....                                                                                 | 1   | 1 | seq |
| .....gcgagagguGcggggguu.....                                                                                 | 4   | 1 | seq |
| .....Ncgagagguacggggguu.....                                                                                 | 2   | 1 | seq |
| .....gcgagGggguacggggguu.....                                                                                | 1   | 1 | seq |
| .....gcgagagguacggggguuA.....                                                                                | 41  | 1 | seq |
| .....gcgagagguacggggguGu.....                                                                                | 1   | 1 | seq |
| .....gcgagaggGacggggguu.....                                                                                 | 1   | 1 | seq |
| .....gcgGgagguacggggguu.....                                                                                 | 1   | 1 | seq |
| .....gcgagagguacggggguCu.....                                                                                | 4   | 1 | seq |
| .....gcgagagguacggggguu.....                                                                                 | 214 | 0 | seq |
| .....gcgagagguacggggguu.....                                                                                 | 4   | 1 | seq |
| .....Acgagagguacggggguu.....                                                                                 | 1   | 1 | seq |
| .....gcgagagguacggggguCuu.....                                                                               | 1   | 1 | seq |
| .....gcgagagguacggggguuug.....                                                                               | 15  | 0 | seq |
| .....gcgagagguacggggguuAg.....                                                                               | 2   | 1 | seq |
| .....gcgagagguacggggguuA.....                                                                                | 1   | 1 | seq |
| .....cgagagguacggggguuA.....                                                                                 | 1   | 1 | seq |
| .....cgagagguacggggguu.....                                                                                  | 6   | 0 | seq |
| .....cgagagguacggggguuug.....                                                                                | 1   | 0 | seq |
| .....cgagagguacggggguuAg.....                                                                                | 1   | 1 | seq |
| .....gagagguacggggguuug.....                                                                                 | 6   | 0 | seq |
| .....gagagguacggggguuAg.....                                                                                 | 2   | 1 | seq |
| .....gagguacggggguuugaua.....                                                                                | 1   | 0 | seq |

Provisional ID : MA\_52831\_13176  
Score total : 2.5  
Score for star read(s) : -1.3  
Score for read counts : 0  
Score for mfe : 2.2  
Score for randfold : 1.6  
Score for cons. seed :  
Total read count : 78  
Mature read count : 78  
Loop read count : 0  
Star read count : 0

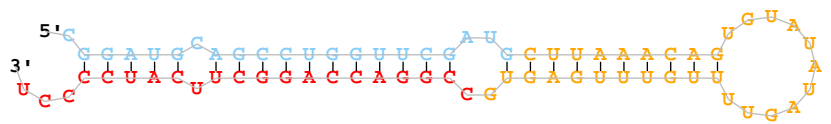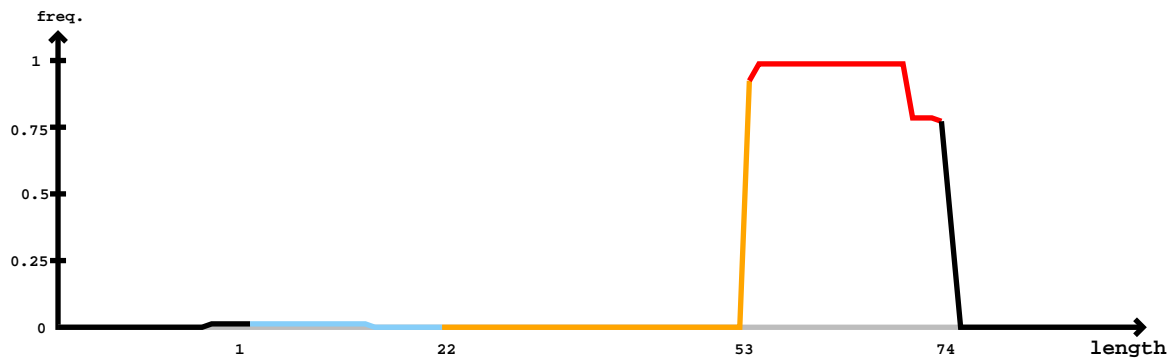

Star

Mature

| 5' |                      | -3'             | exp   |    |        |
|----|----------------------|-----------------|-------|----|--------|
|    | ggaaggacaguguuggga   | ccggaccaggcucau | reads | mm | sample |
|    | ggaugcagccugguucgaug | ccggaccaggcucau | 1     | 1  | seq    |
|    | ggaugcagccugguucgaug | ccggaccaggcucau | 15    | 1  | seq    |
|    | ggaugcagccugguucgaug | ccggaccaggcucau | 1     | 0  | seq    |
|    | ggaugcagccugguucgaug | ccggaccaggcucau | 1     | 1  | seq    |
|    | ggaugcagccugguucgaug | ccggaccaggcucau | 19    | 1  | seq    |
|    | ggaugcagccugguucgaug | ccggaccaggcucau | 3     | 1  | seq    |
|    | ggaugcagccugguucgaug | ccggaccaggcucau | 24    | 1  | seq    |
|    | ggaugcagccugguucgaug | ccggaccaggcucau | 1     | 1  | seq    |
|    | ggaugcagccugguucgaug | ccggaccaggcucau | 9     | 0  | seq    |
|    | ggaugcagccugguucgaug | ccggaccaggcucau | 5     | 1  | seq    |

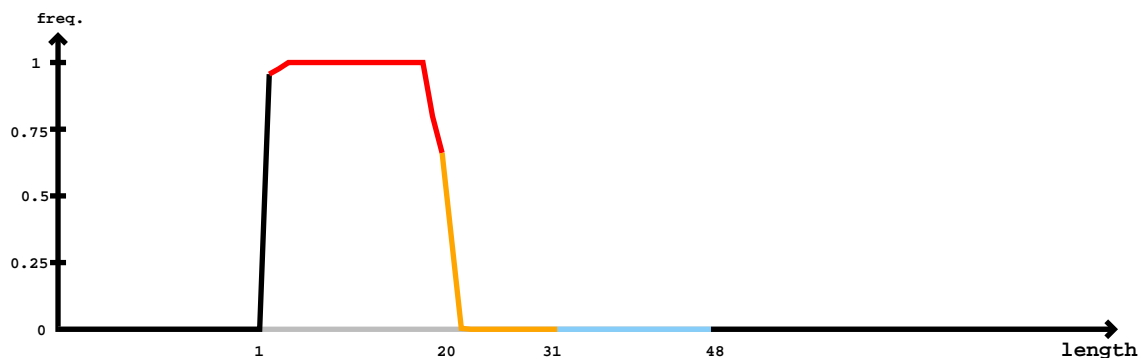

Star

| 5'-       |         | -3'        | exp    |           |
|-----------|---------|------------|--------|-----------|
| cuuaa     | augggg  | ugcuuguua  | aaauu  | agagacua  |
| uuu       | gagacua | uuguga     | cugc   | aucuguu   |
| augugucua | uaaauu  | caaaagucca | ucauuu | ucgcuucac |
| uuauugga  | agcaauu | uc         |        |           |
| reads     | mm      | sample     |        |           |
| 1         | 1       | seq        |        |           |
| 50        | 0       | seq        |        |           |
| 1         | 1       | seq        |        |           |
| 6         | 1       | seq        |        |           |
| 2         | 1       | seq        |        |           |
| 2         | 1       | seq        |        |           |
| 1         | 1       | seq        |        |           |
| 1         | 1       | seq        |        |           |
| 37        | 0       | seq        |        |           |
| 4         | 1       | seq        |        |           |
| 1         | 1       | seq        |        |           |
| 160       | 1       | seq        |        |           |
| 5         | 1       | seq        |        |           |
| 1         | 1       | seq        |        |           |
| 9         | 0       | seq        |        |           |
| 2         | 1       | seq        |        |           |
| 1         | 1       | seq        |        |           |
| 1         | 1       | seq        |        |           |
| 6         | 1       | seq        |        |           |
| 3         | 1       | seq        |        |           |
| 1         | 1       | seq        |        |           |
| 2         | 0       | seq        |        |           |
| 1         | 1       | seq        |        |           |

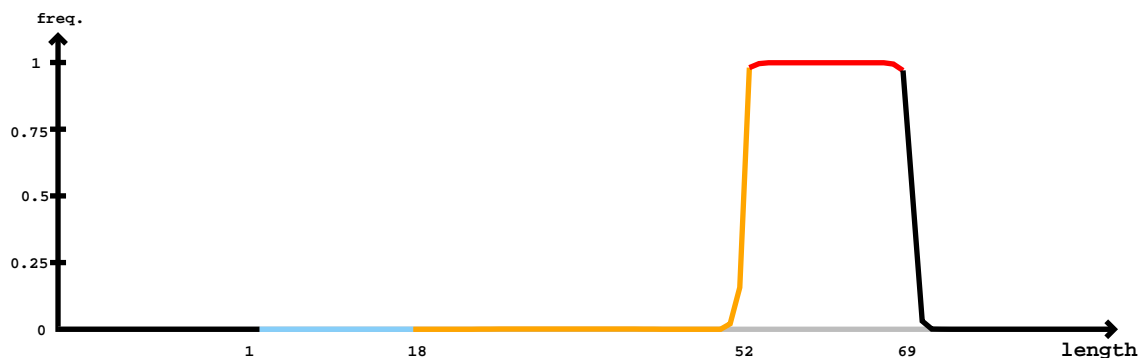

## Mature



## Star

## Mature

|                    |                    |                 |                  |                            |                     |     |   |     |
|--------------------|--------------------|-----------------|------------------|----------------------------|---------------------|-----|---|-----|
| ugaaauuccacgggggug | uccaaauaguggauguug | gguauguuggauugu | gaucacccuacuucga | gagucugguaauuggaa          | cucugagggauuguugagg |     |   |     |
| .....              | .....              | .....           | .....            | gagucGgguaauuggaa.....     | .....               | 1   | 1 | seq |
| .....              | .....              | .....           | .....            | gagucugguaauUgaa.....      | .....               | 1   | 1 | seq |
| .....              | .....              | .....           | .....            | gagucugguaauugCaa.....     | .....               | 2   | 1 | seq |
| .....              | .....              | .....           | .....            | gagucuggGaaauuggaa.....    | .....               | 3   | 1 | seq |
| .....              | .....              | .....           | .....            | gagucugguaauuggCa.....     | .....               | 1   | 1 | seq |
| .....              | .....              | .....           | .....            | gagucugguaauuggaG.....     | .....               | 47  | 1 | seq |
| .....              | .....              | .....           | .....            | gagucugguGauuuggaa.....    | .....               | 7   | 1 | seq |
| .....              | .....              | .....           | .....            | Uagucugguaauuggaa.....     | .....               | 6   | 1 | seq |
| .....              | .....              | .....           | .....            | Cagucugguaauuggaa.....     | .....               | 1   | 1 | seq |
| .....              | .....              | .....           | .....            | gagucugguaauuggaU.....     | .....               | 9   | 1 | seq |
| .....              | .....              | .....           | .....            | gagucugguaauCggaa.....     | .....               | 5   | 1 | seq |
| .....              | .....              | .....           | .....            | gagucugguaauuggGa.....     | .....               | 14  | 1 | seq |
| .....              | .....              | .....           | .....            | gagucAgguaauuggaac.....    | .....               | 1   | 1 | seq |
| .....              | .....              | .....           | .....            | gagucuggGaaauuggaac.....   | .....               | 1   | 1 | seq |
| .....              | .....              | .....           | .....            | gagucugguaGuuuggaac.....   | .....               | 4   | 1 | seq |
| .....              | .....              | .....           | .....            | gagucugguaauuggaac.....    | .....               | 692 | 0 | seq |
| .....              | .....              | .....           | .....            | gagucugguaauuggaCc.....    | .....               | 1   | 1 | seq |
| .....              | .....              | .....           | .....            | gagCcugguaauuggaac.....    | .....               | 1   | 1 | seq |
| .....              | .....              | .....           | .....            | gagucuggCaaauuggaac.....   | .....               | 2   | 1 | seq |
| .....              | .....              | .....           | .....            | Nagucugguaauuggaac.....    | .....               | 2   | 1 | seq |
| .....              | .....              | .....           | .....            | gGgucugguaauuggaac.....    | .....               | 2   | 1 | seq |
| .....              | .....              | .....           | .....            | gagucugguaauuAgaac.....    | .....               | 1   | 1 | seq |
| .....              | .....              | .....           | .....            | gagucugguaauuggGac.....    | .....               | 6   | 1 | seq |
| .....              | .....              | .....           | .....            | gagucuAguaauuggaac.....    | .....               | 1   | 1 | seq |
| .....              | .....              | .....           | .....            | gagucCgguaauuggaac.....    | .....               | 1   | 1 | seq |
| .....              | .....              | .....           | .....            | gagucugguaauCggaac.....    | .....               | 1   | 1 | seq |
| .....              | .....              | .....           | .....            | Cagucugguaauuggaac.....    | .....               | 1   | 1 | seq |
| .....              | .....              | .....           | .....            | gaUucugguaauuggaac.....    | .....               | 1   | 1 | seq |
| .....              | .....              | .....           | .....            | gagucugguaauugAaac.....    | .....               | 1   | 1 | seq |
| .....              | .....              | .....           | .....            | gagucugguaauuggaaG.....    | .....               | 46  | 1 | seq |
| .....              | .....              | .....           | .....            | gagucugguGauuuggaac.....   | .....               | 2   | 1 | seq |
| .....              | .....              | .....           | .....            | gagucugguaauuggaaA.....    | .....               | 15  | 1 | seq |
| .....              | .....              | .....           | .....            | gaAucugguaauuggaac.....    | .....               | 1   | 1 | seq |
| .....              | .....              | .....           | .....            | gagucugguaauuggaGc.....    | .....               | 1   | 1 | seq |
| .....              | .....              | .....           | .....            | gagucugAuaauuggaac.....    | .....               | 1   | 1 | seq |
| .....              | .....              | .....           | .....            | gagucuggAaaauuggaac.....   | .....               | 1   | 1 | seq |
| .....              | .....              | .....           | .....            | gagucugguaauuggaaUu.....   | .....               | 31  | 1 | seq |
| .....              | .....              | .....           | .....            | gagucugguaauuggaacA.....   | .....               | 6   | 1 | seq |
| .....              | .....              | .....           | .....            | gagucugguaauuggaacC.....   | .....               | 1   | 1 | seq |
| .....              | .....              | .....           | .....            | gagucugguaauuggaaGu.....   | .....               | 1   | 1 | seq |
| .....              | .....              | .....           | .....            | gagucugguaauuggaacu.....   | .....               | 2   | 0 | seq |
| .....              | .....              | .....           | .....            | gagucugguaauuggaacG.....   | .....               | 63  | 1 | seq |
| .....              | .....              | .....           | .....            | gagucugguaauuggaacGc.....  | .....               | 1   | 1 | seq |
| .....              | .....              | .....           | .....            | gagucugguaauuggaacuG.....  | .....               | 1   | 1 | seq |
| .....              | .....              | .....           | .....            | gagucugguaauuggaacucu..... | .....               | 1   | 0 | seq |
| .....              | .....              | .....           | .....            | agucCgguaauuggaac.....     | .....               | 1   | 1 | seq |
| .....              | .....              | .....           | .....            | agucugguaauuggaGc.....     | .....               | 1   | 1 | seq |
| .....              | .....              | .....           | .....            | agucugguaauuggaaG.....     | .....               | 5   | 1 | seq |
| .....              | .....              | .....           | .....            | agucugguaauuggaac.....     | .....               | 49  | 0 | seq |
| .....              | .....              | .....           | .....            | agucugguaauuggaaA.....     | .....               | 1   | 1 | seq |
| .....              | .....              | .....           | .....            | agucugguaauuggaaUu.....    | .....               | 5   | 1 | seq |
| .....              | .....              | .....           | .....            | agucugguaauuggaacu.....    | .....               | 1   | 0 | seq |
| .....              | .....              | .....           | .....            | agucugguaauuggaaGu.....    | .....               | 1   | 1 | seq |
| .....              | .....              | .....           | .....            | agucugguaauuggaacA.....    | .....               | 1   | 1 | seq |
| .....              | .....              | .....           | .....            | gucugguaauuggaaUu.....     | .....               | 10  | 1 | seq |
| .....              | .....              | .....           | .....            | gucugguaauuggaacA.....     | .....               | 2   | 1 | seq |
| .....              | .....              | .....           | .....            | gucugguaauuggaaGu.....     | .....               | 1   | 1 | seq |
| .....              | .....              | .....           | .....            | gucugguaauuggaacu.....     | .....               | 1   | 0 | seq |

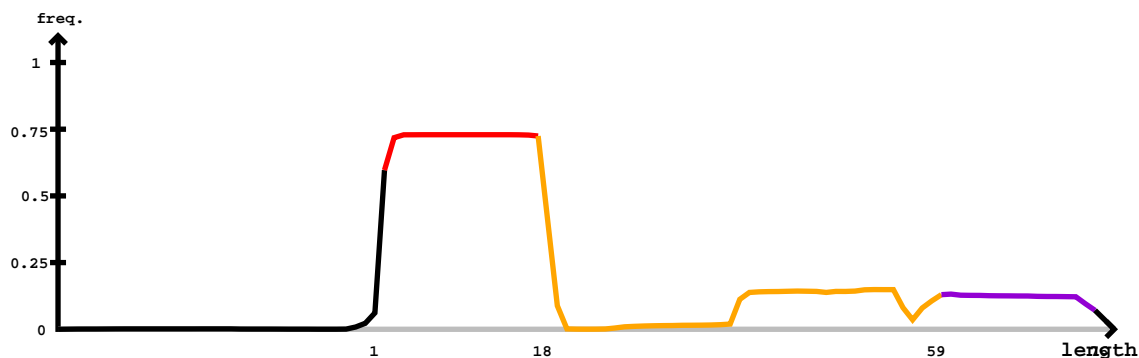

Star

## Mature

## Star

|                                  |               |           |                                           |                  |   |     |
|----------------------------------|---------------|-----------|-------------------------------------------|------------------|---|-----|
| cuagcuacguggagguuccccuucacgaccaa | cuucuuagaggga | cuau      | gauguuuuaggccauggaauuuugaggcaauaacagguuug | ugaugcccuuagauuu | c |     |
| .....aCcuucuuagaggga             | cu            | .....     | .....                                     | 1                | 1 | seq |
| .....aUcuucuuagaggga             | cuau          | .....     | .....                                     | 2                | 1 | seq |
| .....aNcuucuuagaggga             | cuau          | g.....    | .....                                     | 1                | 1 | seq |
| .....aUcuucuuagaggga             | cuau          | g.....    | .....                                     | 3                | 1 | seq |
| .....aGcuucuuagaggga             | cuau          | ga.....   | .....                                     | 165              | 1 | seq |
| .....aGcuucuuagaggga             | cuau          | gaug..... | .....                                     | 1                | 1 | seq |
| .....Ucuucuuagaggga              | cu            | .....     | .....                                     | 9                | 1 | seq |
| .....Ncuucuuagaggga              | cu            | .....     | .....                                     | 14               | 1 | seq |
| .....acuucuuagaggga              | cu            | .....     | .....                                     | 17               | 0 | seq |
| .....aAuucuuagaggga              | cu            | .....     | .....                                     | 2                | 1 | seq |
| .....Ncuucuuagaggga              | cuau          | .....     | .....                                     | 10               | 1 | seq |
| .....acuucuuagaggga              | cuau          | .....     | .....                                     | 12               | 0 | seq |
| .....Ucuucuuagaggga              | cuau          | .....     | .....                                     | 8                | 1 | seq |
| .....Ncuucuuagaggga              | cuau          | g.....    | .....                                     | 9                | 1 | seq |
| .....acGucuuaagaggga             | cuau          | g.....    | .....                                     | 1                | 1 | seq |
| .....acuucuuagaggga              | cuau          | g.....    | .....                                     | 8                | 0 | seq |
| .....Ucuucuuagaggga              | cuau          | g.....    | .....                                     | 9                | 1 | seq |
| .....Gcuucuuagaggga              | cuau          | ga.....   | .....                                     | 401              | 1 | seq |
| .....Ucuucuuagaggga              | cuau          | ga.....   | .....                                     | 1                | 1 | seq |
| .....Uuuucuuagaggga              | cuau          | .....     | .....                                     | 4                | 1 | seq |
| .....cuuUuuagaggga               | cuau          | .....     | .....                                     | 1                | 1 | seq |
| .....cuucuuagaggga               | cuau          | .....     | .....                                     | 3392             | 0 | seq |
| .....cuucuuagGggga               | cuau          | .....     | .....                                     | 21               | 1 | seq |
| .....cuucuuagaAgga               | cuau          | .....     | .....                                     | 3                | 1 | seq |
| .....cuucuuUaggga                | cuau          | .....     | .....                                     | 1                | 1 | seq |
| .....cuCcuuagaggga               | cuau          | .....     | .....                                     | 16               | 1 | seq |
| .....cuucGagaggga                | cuau          | .....     | .....                                     | 1                | 1 | seq |
| .....cuucuuagaCggga              | cuau          | .....     | .....                                     | 1                | 1 | seq |
| .....cuucuuagaggga               | Ccuau         | .....     | .....                                     | 1                | 1 | seq |
| .....cuucuuagaggga               | Cgu           | .....     | .....                                     | 1                | 1 | seq |
| .....cuucuuagaggga               | Ucuau         | .....     | .....                                     | 1                | 1 | seq |
| .....cuucAagaggga                | cuau          | .....     | .....                                     | 1                | 1 | seq |
| .....cCucuuaagaggga              | cuau          | .....     | .....                                     | 3                | 1 | seq |
| .....cuucuuGaggga                | cuau          | .....     | .....                                     | 3                | 1 | seq |
| .....cuucuuagaggga               | Cau           | .....     | .....                                     | 4                | 1 | seq |
| .....cuucuuagaggga               | cuA           | .....     | .....                                     | 25               | 1 | seq |
| .....cAuucuuagaggga              | cuau          | .....     | .....                                     | 1                | 1 | seq |
| .....cuucuuUgaggga               | cuau          | .....     | .....                                     | 1                | 1 | seq |
| .....cuucCuaggga                 | cuau          | .....     | .....                                     | 7                | 1 | seq |
| .....Guucuuagaggga               | cuau          | .....     | .....                                     | 6                | 1 | seq |
| .....cuucuuagaggga               | cuG           | .....     | .....                                     | 38               | 1 | seq |
| .....Nuucuuagaggga               | cuau          | .....     | .....                                     | 4                | 1 | seq |
| .....cuucCagaggga                | cuau          | .....     | .....                                     | 1                | 1 | seq |
| .....cuucAagaggga                | cuau          | .....     | .....                                     | 2                | 1 | seq |
| .....cuucuuagaggga               | Ccuau         | .....     | .....                                     | 13               | 1 | seq |
| .....cuucuuagaggga               | cuC           | .....     | .....                                     | 470              | 1 | seq |
| .....cuucuuagaggga               | cuGu          | .....     | .....                                     | 23               | 1 | seq |
| .....cuucGuaggga                 | cuau          | .....     | .....                                     | 1                | 1 | seq |
| .....cuucuuagaggga               | Cgaug         | .....     | .....                                     | 1                | 1 | seq |
| .....Nuucuuagaggga               | cuau          | g.....    | .....                                     | 2                | 1 | seq |
| .....cuucuuagGggga               | cuau          | g.....    | .....                                     | 8                | 1 | seq |
| .....cuucuuagaggga               | cuGg          | .....     | .....                                     | 6                | 1 | seq |
| .....cuucuuagaggga               | cuC           | .....     | .....                                     | 3                | 1 | seq |
| .....cuucuuGgaggga               | cuau          | g.....    | .....                                     | 3                | 1 | seq |
| .....cCucuuaagaggga              | cuau          | g.....    | .....                                     | 2                | 1 | seq |
| .....cuuUuuagaggga               | cuau          | g.....    | .....                                     | 1                | 1 | seq |
| .....cuucuuagaggga               | cuau          | U.....    | .....                                     | 5                | 1 | seq |
| .....cuucuuagaggga               | Cau           | g.....    | .....                                     | 1                | 1 | seq |
| .....cuucuuagaAgga               | cuau          | g.....    | .....                                     | 1                | 1 | seq |
| .....cuucuuagagCga               | cuau          | g.....    | .....                                     | 2                | 1 | seq |
| .....cuucuuagaggga               | cuUug         | .....     | .....                                     | 1                | 1 | seq |
| .....cuucuuagaggga               | cuAag         | .....     | .....                                     | 2                | 1 | seq |
| .....cuucuuagagUga               | cuau          | g.....    | .....                                     | 1                | 1 | seq |
| .....cuAuuagaggga                | cuau          | g.....    | .....                                     | 2                | 1 | seq |
| .....cuucuuagaggga               | cuCug         | .....     | .....                                     | 1                | 1 | seq |
| .....Uuuucuuagaggga              | cuau          | g.....    | .....                                     | 3                | 1 | seq |
| .....cuGcuuagaggga               | cuau          | g.....    | .....                                     | 4                | 1 | seq |
| .....cuucAagaggga                | cuau          | g.....    | .....                                     | 1                | 1 | seq |
| .....cuucuuagaggga               | cuau          | g.....    | .....                                     | 2452             | 0 | seq |
| .....cuucuuagaggga               | Ccuau         | g.....    | .....                                     | 8                | 1 | seq |

## Mature

## Star

cuagcuacguggagguuccccuucacgaccaacuucuuagagggacuaugaugauguuuuaggccauggaauuuugaggcaauaacagguuugugaugcccuuagauuuuc

|                                |      |   |     |
|--------------------------------|------|---|-----|
| .....cuucuaUagggacuaug.....    | 2    | 1 | seq |
| .....cuucuCagagggacuaug.....   | 2    | 1 | seq |
| .....cuucuuagagggacuCug.....   | 4    | 1 | seq |
| .....cAucuuagagggacuaug.....   | 3    | 1 | seq |
| .....cuucuuagagggaAuaug.....   | 1    | 1 | seq |
| .....cuucuuagagggacuaCg.....   | 26   | 1 | seq |
| .....cuucuuagagggUcuaug.....   | 2    | 1 | seq |
| .....cuucuuagagggacCaug.....   | 2    | 1 | seq |
| .....cuucGuagagggacuaug.....   | 2    | 1 | seq |
| .....cuuAuuagagggacuaug.....   | 1    | 1 | seq |
| .....cuCcuuagagggacuaug.....   | 12   | 1 | seq |
| .....Guucuuagagggacuaug.....   | 5    | 1 | seq |
| .....cuucCuagagggacuaug.....   | 2    | 1 | seq |
| .....Guucuuagagggacuauga.....  | 1    | 1 | seq |
| .....cuucuuagagggGcuauga.....  | 2    | 1 | seq |
| .....cuucuuGgagggacuauga.....  | 1    | 1 | seq |
| .....cuucuuagagggacuauga.....  | 242  | 0 | seq |
| .....cuucuuagagggacuCuga.....  | 1    | 1 | seq |
| .....cuucuuagagggacuaGga.....  | 1    | 1 | seq |
| .....cuucuuagagggacuaugC.....  | 21   | 1 | seq |
| .....cuucuuagagggacuaCga.....  | 2    | 1 | seq |
| .....cuGcuuagagggacuauga.....  | 1    | 1 | seq |
| .....cuucuuagGgggacuauga.....  | 1    | 1 | seq |
| .....cuCcuuagagggacuauga.....  | 1    | 1 | seq |
| .....cuucuuagagggacuaugaC..... | 3    | 1 | seq |
| .....uucuCagagggacuaug.....    | 3    | 1 | seq |
| .....uucuuagaAggacuaug.....    | 1    | 1 | seq |
| .....uucuuagagggacuaug.....    | 1435 | 0 | seq |
| .....uucuuagagggacuaGg.....    | 6    | 1 | seq |
| .....uucuuagUgggacuaug.....    | 2    | 1 | seq |
| .....Cucuuagagggacuaug.....    | 3    | 1 | seq |
| .....uucuuagagggGcuaug.....    | 6    | 1 | seq |
| .....uucuGagagggacuaug.....    | 1    | 1 | seq |
| .....uucuaUagggacuaug.....     | 2    | 1 | seq |
| .....uucuuagagggacuauC.....    | 3    | 1 | seq |
| .....uucuuagagggacuaCg.....    | 12   | 1 | seq |
| .....uucuuagagggacGaug.....    | 1    | 1 | seq |
| .....uucuuagGgggacuaug.....    | 6    | 1 | seq |
| .....uucuuagaUggacuaug.....    | 1    | 1 | seq |
| .....uucuuagagggacuCug.....    | 2    | 1 | seq |
| .....uucuuagagggacCaug.....    | 1    | 1 | seq |
| .....uucuaCagggacuaug.....     | 1    | 1 | seq |
| .....uucuuagagggacuaAg.....    | 2    | 1 | seq |
| .....uucuuagagUgacuaug.....    | 2    | 1 | seq |
| .....uucAuaagggacuaug.....     | 2    | 1 | seq |
| .....uucuuagaggAacuaug.....    | 1    | 1 | seq |
| .....uuUuuagagggacuaug.....    | 1    | 1 | seq |
| .....Nucuuagagggacuaug.....    | 3    | 1 | seq |
| .....uucuuagagggacuaU.....     | 5    | 1 | seq |
| .....uucCuagagggacuaug.....    | 3    | 1 | seq |
| .....uCuuaagagggacuaug.....    | 7    | 1 | seq |
| .....uucuuGgagggacuaug.....    | 1    | 1 | seq |
| .....uucuuagagggacUuga.....    | 1    | 1 | seq |
| .....uCuuaagagggacuauga.....   | 1    | 1 | seq |
| .....uucuaUagggacuauga.....    | 1    | 1 | seq |
| .....uucuuagagggacuaugC.....   | 10   | 1 | seq |
| .....uucuuagagggacuauga.....   | 41   | 0 | seq |
| .....uucuuagagggacuaugaC.....  | 2    | 1 | seq |
| .....ucuuagagggacuaUa.....     | 1    | 1 | seq |
| .....ucuuagagggacuaugC.....    | 11   | 1 | seq |
| .....ucuuagGgggacuauga.....    | 1    | 1 | seq |
| .....ucuuagagggUcuauga.....    | 1    | 1 | seq |
| .....ucuuagUgggacuauga.....    | 1    | 1 | seq |
| .....ucuuagagggacuauga.....    | 119  | 0 | seq |
| .....ucuuagagggacuaugaC.....   | 2    | 1 | seq |
| .....ucuuagagggacuaugCu.....   | 2    | 1 | seq |
| .....ucuuagagggacuaugaCu.....  | 1    | 1 | seq |
| .....cuuagagggacuaugCu.....    | 1    | 1 | seq |
| .....uuagagggacuaugUuu.....    | 1    | 1 | seq |
| .....uuagagggacuaugaCu.....    | 1    | 1 | seq |

## Mature

## Star

|                                   |               |        |          |        |       |       |        |        |          |       |         |       |      |     |     |
|-----------------------------------|---------------|--------|----------|--------|-------|-------|--------|--------|----------|-------|---------|-------|------|-----|-----|
| cuagcuacguggagguuuccccuucacgaccaa | cuucuuagaggga | cuau   | gauguuuu | aggcca | uggaa | uuu   | aggca  | ua     | aacagguu | ug    | augcccu | u     | agau | cu  | c   |
| .....                             | agaggga       | cu     | au       | C      | guuu  | ..... | 1      | 1      | seq      |       |         |       |      |     |     |
| .....                             | C             | guuuu  | aggcca   | uggaa  | ..... | 1     | 1      | seq    |          |       |         |       |      |     |     |
| .....                             | Uuuu          | aggcca | uggaa    | uuu    | aggca | au    | .....  | 1      | 1        | seq   |         |       |      |     |     |
| .....                             | uuu           | aggcca | uggaa    | Guu    | u     | aggca | aua    | a      | cagguu   | ..... | 1       | 1     | seq  |     |     |
| .....                             | uuu           | aggcca | uggaa    | Guu    | u     | aggca | aua    | a      | cagguu   | u     | g       | ..... | 1    | 1   | seq |
| .....                             | uu            | aggcca | uggaa    | uuu    | agg   | ..... | 1      | 0      | seq      |       |         |       |      |     |     |
| .....                             | uu            | aggcca | uggaa    | uuu    | agg   | ..... | 1      | 0      | seq      |       |         |       |      |     |     |
| .....                             | uu            | aggcca | uggaa    | uuu    | aggca | ..... | 2      | 0      | seq      |       |         |       |      |     |     |
| .....                             | uu            | aggcca | uggaa    | Cuu    | u     | aggca | .....  | 1      | 1        | seq   |         |       |      |     |     |
| .....                             | uu            | aggcca | uggaa    | uuu    | aggca | aua   | .....  | 1      | 0        | seq   |         |       |      |     |     |
| .....                             | uu            | aggcca | uggaa    | uuu    | aggca | aua   | a      | ca     | .....    | 1     | 0       | seq   |      |     |     |
| .....                             | uu            | aggcca | uggaa    | Guu    | u     | aggca | aua    | a      | cagguu   | ..... | 1       | 1     | seq  |     |     |
| .....                             | u             | aggcca | uggaa    | uuu    | u     | ga    | .....  | 1      | 0        | seq   |         |       |      |     |     |
| .....                             | u             | aggcca | uggaa    | uuu    | agg   | ..... | 3      | 0      | seq      |       |         |       |      |     |     |
| .....                             | u             | aggcca | uggaa    | uuu    | aggc  | ..... | 2      | 0      | seq      |       |         |       |      |     |     |
| .....                             | ua            | aggcca | uggaa    | uuu    | aggc  | ..... | 1      | 1      | seq      |       |         |       |      |     |     |
| .....                             | u             | aggcca | uggaa    | uuu    | agg   | U     | .....  | 1      | 1        | seq   |         |       |      |     |     |
| .....                             | u             | aggcca | uggaa    | Cuu    | u     | aggca | .....  | 1      | 1        | seq   |         |       |      |     |     |
| .....                             | u             | aggcca | uggaa    | uuu    | aggc  | U     | .....  | 1      | 1        | seq   |         |       |      |     |     |
| .....                             | u             | aggcca | uggaa    | uuu    | aggc  | G     | .....  | 1      | 1        | seq   |         |       |      |     |     |
| .....                             | u             | aggcca | uggaa    | uuu    | aggca | ..... | 15     | 0      | seq      |       |         |       |      |     |     |
| .....                             | u             | aggcca | uggaa    | uuu    | aggca | au    | .....  | 2      | 0        | seq   |         |       |      |     |     |
| .....                             | u             | aggcca | uggaa    | uuu    | aggca | aua   | a      | cagg   | .....    | 1     | 1       | seq   |      |     |     |
| .....                             | u             | aggcca | uggaa    | Guu    | u     | aggca | aua    | a      | cagguu   | ..... | 17      | 1     | seq  |     |     |
| .....                             | u             | aggcca | uggaa    | Guu    | u     | aggca | aua    | a      | cagguu   | u     | g       | ..... | 1    | 1   | seq |
| .....                             | u             | aggcca | uggaa    | Guu    | u     | aggca | aua    | a      | cagguu   | u     | g       | au    | g    | cc  | uu  |
| .....                             | aggcca        | uggaa  | uuu      | agg    | ..... | 2     | 0      | seq    |          |       |         |       |      |     |     |
| .....                             | aggcca        | uggaa  | uuu      | agg    | ..... | 6     | 0      | seq    |          |       |         |       |      |     |     |
| .....                             | aggcca        | uggaa  | uuu      | aggc   | ..... | 6     | 0      | seq    |          |       |         |       |      |     |     |
| .....                             | aggcca        | uggaa  | uuu      | agg    | U     | ..... | 1      | 1      | seq      |       |         |       |      |     |     |
| .....                             | aggcca        | uggaa  | Cuu      | u      | aggca | ..... | 1      | 1      | seq      |       |         |       |      |     |     |
| .....                             | aggcca        | uggaa  | uuu      | aggca  | ..... | 20    | 0      | seq    |          |       |         |       |      |     |     |
| .....                             | aggcca        | uggaa  | uuu      | aggc   | Ga    | ..... | 1      | 1      | seq      |       |         |       |      |     |     |
| .....                             | aggcca        | uggaa  | Cuu      | u      | aggca | ..... | 1      | 1      | seq      |       |         |       |      |     |     |
| .....                             | aggcca        | uggaa  | uuu      | aggca  | C     | ..... | 1      | 1      | seq      |       |         |       |      |     |     |
| .....                             | aggcca        | uggaa  | uuu      | aggca  | aua   | a     | ca     | .....  | 1        | 0     | seq     |       |      |     |     |
| .....                             | aggcca        | uggaa  | uuu      | aggca  | aua   | a     | cagA   | .....  | 1        | 1     | seq     |       |      |     |     |
| .....                             | aggcca        | uggaa  | uuu      | aggca  | aua   | a     | cagg   | .....  | 2        | 0     | seq     |       |      |     |     |
| .....                             | aggcca        | uggaa  | Guu      | u      | aggca | aua   | a      | cagguu | .....    | 15    | 1       | seq   |      |     |     |
| .....                             | aggcca        | uggaa  | Guu      | u      | aggca | aua   | a      | cagguu | u        | g     | .....   | 1     | 1    | seq |     |
| .....                             | ggcca         | uggaa  | uuu      | agg    | ..... | 1     | 0      | seq    |          |       |         |       |      |     |     |
| .....                             | ggcca         | uggaa  | uuu      | agg    | ..... | 1     | 0      | seq    |          |       |         |       |      |     |     |
| .....                             | ggcca         | uggaa  | uuu      | aggc   | G     | ..... | 1      | 1      | seq      |       |         |       |      |     |     |
| .....                             | ggcca         | uggaa  | uuu      | aggca  | ..... | 5     | 0      | seq    |          |       |         |       |      |     |     |
| .....                             | ggcca         | uggaa  | uuu      | agg    | U     | ggca  | .....  | 1      | 1        | seq   |         |       |      |     |     |
| .....                             | ggcca         | uggaa  | Guu      | u      | aggca | aua   | a      | cagguu | .....    | 11    | 1       | seq   |      |     |     |
| .....                             | ggcca         | uggaa  | Guu      | u      | aggca | aua   | a      | cagguu | u        | g     | .....   | 1     | 1    | seq |     |
| .....                             | ggcca         | uggaa  | uuu      | aggca  | aua   | a     | cagguu | .....  | 1        | 1     | seq     |       |      |     |     |
| .....                             | gcca          | uggaa  | uuu      | agg    | ..... | 1     | 0      | seq    |          |       |         |       |      |     |     |
| .....                             | gcca          | uggaa  | uuu      | aggca  | ..... | 1     | 0      | seq    |          |       |         |       |      |     |     |
| .....                             | gcca          | uggaa  | uuu      | aggc   | U     | ..... | 1      | 1      | seq      |       |         |       |      |     |     |
| .....                             | gcca          | uggaa  | uuu      | aggca  | aua   | a     | ca     | .....  | 1        | 0     | seq     |       |      |     |     |
| .....                             | gcca          | uggaa  | Guu      | u      | aggca | aua   | a      | cagguu | .....    | 10    | 1       | seq   |      |     |     |
| .....                             | gcca          | uggaa  | Guu      | u      | aggca | aua   | a      | cagguu | .....    | 1     | 1       | seq   |      |     |     |
| .....                             | gcca          | uggaa  | Guu      | u      | aggca | aua   | a      | cagguu | u        | g     | .....   | 1     | 1    | seq |     |
| .....                             | cca           | uggaa  | uuu      | agg    | U     | ..... | 1      | 1      | seq      |       |         |       |      |     |     |
| .....                             | cca           | uggaa  | uuu      | aggca  | ..... | 4     | 0      | seq    |          |       |         |       |      |     |     |
| .....                             | cca           | uggaa  | uuu      | aggca  | ..... | 1     | 0      | seq    |          |       |         |       |      |     |     |
| .....                             | cca           | uggaa  | uuu      | aggca  | au    | ..... | 1      | 0      | seq      |       |         |       |      |     |     |
| .....                             | cca           | uggaa  | uuu      | aggca  | aua   | ..... | 2      | 0      | seq      |       |         |       |      |     |     |
| .....                             | cca           | uggaa  | Guu      | u      | aggca | aua   | a      | cagguu | .....    | 3     | 1       | seq   |      |     |     |
| .....                             | ca            | uggaa  | uuu      | aggca  | ..... | 5     | 0      | seq    |          |       |         |       |      |     |     |
| .....                             | ca            | uggaa  | uuu      | agg    | Cca   | ..... | 1      | 1      | seq      |       |         |       |      |     |     |
| .....                             | ca            | uggaa  | Guu      | u      | aggca | aua   | a      | cagguu | .....    | 1     | 1       | seq   |      |     |     |
| .....                             | aug           | gaa    | uuu      | aggca  | au    | ..... | 1      | 0      | seq      |       |         |       |      |     |     |
| .....                             | aug           | gaa    | Guu      | u      | aggca | aua   | a      | cagguu | .....    | 3     | 1       | seq   |      |     |     |
| .....                             | aug           | gaa    | uuu      | aggca  | aua   | a     | caggu  | u      | g        | au    | g       | ..... | 1    | 1   | seq |
| .....                             | u             | gg     | gaa      | uuu    | aggca | aua   | .....  | 1      | 0        | seq   |         |       |      |     |     |
| .....                             | u             | gg     | gaa      | uuu    | aggca | aua   | .....  | 1      | 0        | seq   |         |       |      |     |     |
| .....                             | u             | gg     | gaa      | uuu    | aggca | aua   | a      | ca     | .....    | 1     | 0       | seq   |      |     |     |

## Mature

## Star

cuagcuacguggagguuucccuacacgaccaacuucuuagagggacuaugauuguuuaggccauggaauuuugaggcaauaacaggguuugugaugcccuuagauguuc

|                                               |     |   |     |
|-----------------------------------------------|-----|---|-----|
| .....uggaaauuuugaggcaauaacaggg.....           | 1   | 0 | seq |
| .....uggaaGuuugaggcaauaacagggu.....           | 4   | 1 | seq |
| .....uggaaGuuugaggcaauaacaggguuugug.....      | 2   | 1 | seq |
| .....uggaaauuuugaggcaauaacaggguCugugaugc..... | 1   | 1 | seq |
| .....ggaauuuugaggcaauaac.....                 | 1   | 0 | seq |
| .....ggaGuuugaggcaauaacagggu.....             | 2   | 1 | seq |
| .....gaaGuuugaggcaauaacagggu.....             | 1   | 1 | seq |
| .....gaaGuuugaggcaauaacaggguuug.....          | 1   | 1 | seq |
| .....gaaGuuugaggcaauaacaggguuugug.....        | 1   | 1 | seq |
| .....aaGuuugaggcaauaacagggu.....              | 5   | 1 | seq |
| .....aaGuuugaggcaauaacaggguuug.....           | 1   | 1 | seq |
| .....aaGuuugaggcaauaacaggguuugu.....          | 1   | 1 | seq |
| .....aaauuuugaggcaauaacaggguCugugaugc.....    | 1   | 1 | seq |
| .....Nuuuugaggcauaaca.....                    | 1   | 1 | seq |
| .....auuuugaggcaauaacaggg.....                | 1   | 0 | seq |
| .....Nuuuugaggcaauaacagggu.....               | 1   | 1 | seq |
| .....auuuugaggcaauaacagggu.....               | 1   | 0 | seq |
| .....aGuuugaggcaauaacagggu.....               | 6   | 1 | seq |
| .....aGuuugaggcaauaacaggguu.....              | 1   | 1 | seq |
| .....aGuuugaggcaauaacaggguuug.....            | 2   | 1 | seq |
| .....aGuuugaggcaauaacaggguuugug.....          | 3   | 1 | seq |
| .....Cuuugaggcaauaacaggg.....                 | 1   | 1 | seq |
| .....Nuuugaggcaauaacaggg.....                 | 2   | 1 | seq |
| .....Guuugaggcaauaacagggu.....                | 16  | 1 | seq |
| .....Guuugaggcaauaacaggguuug.....             | 4   | 1 | seq |
| .....Guuugaggcaauaacaggguuugug.....           | 2   | 1 | seq |
| .....Guuugaggcaauaacaggguuuguga.....          | 2   | 1 | seq |
| .....Guuugaggcaauaacaggguuugugaug.....        | 1   | 1 | seq |
| .....uuuugaggcaauaacaggguCugugaug.....        | 2   | 1 | seq |
| .....uuugaggcaaaAaacaggg.....                 | 1   | 1 | seq |
| .....uuugUggcaauaacaggg.....                  | 1   | 1 | seq |
| .....uuugaggcaauaacaggC.....                  | 5   | 1 | seq |
| .....uuugaggUaauaacaggg.....                  | 1   | 1 | seq |
| .....Auugaggcaauaacaggg.....                  | 2   | 1 | seq |
| .....uuugaggcaauaacaggg.....                  | 787 | 0 | seq |
| .....uuugaggcaauaCcaggg.....                  | 1   | 1 | seq |
| .....uuugaggcaauGacaggg.....                  | 1   | 1 | seq |
| .....uuugaggcaauaacGgg.....                   | 3   | 1 | seq |
| .....uCugaggcaauaacaggg.....                  | 1   | 1 | seq |
| .....uuugaggcaGuaacaggg.....                  | 4   | 1 | seq |
| .....uuugaUgcaauaacaggg.....                  | 1   | 1 | seq |
| .....uuugaggcaaCaacaggg.....                  | 2   | 1 | seq |
| .....uuCgaggcaauaacaggg.....                  | 1   | 1 | seq |
| .....uuugaggcGauaacaggg.....                  | 3   | 1 | seq |
| .....uuugaggcaauaacagA.....                   | 45  | 1 | seq |
| .....uuugaggcaauaacUgg.....                   | 2   | 1 | seq |
| .....Nuugaggcaauaacaggg.....                  | 1   | 1 | seq |
| .....uuugaggcaauaacagU.....                   | 5   | 1 | seq |
| .....Guugaggcaauaacagggu.....                 | 1   | 1 | seq |
| .....uuCgaggcaauaacagggu.....                 | 2   | 1 | seq |
| .....uuugaggcaauaacagggu.....                 | 237 | 0 | seq |
| .....uuugaggcaauaacGgggu.....                 | 1   | 1 | seq |
| .....Nuugaggcaauaacagggu.....                 | 1   | 1 | seq |
| .....uuugaggUaauaacagggu.....                 | 1   | 1 | seq |
| .....uuugaggcaauaacagggC.....                 | 42  | 1 | seq |
| .....uuugaggcaauGacagggu.....                 | 1   | 1 | seq |
| .....uuugaggcaauaacagAu.....                  | 1   | 1 | seq |
| .....uuugaggcaauaacagggu.....                 | 20  | 0 | seq |
| .....uuugaggAcaauaacagggu.....                | 1   | 1 | seq |
| .....uuugaggcaauaacaggguA.....                | 1   | 1 | seq |
| .....uuugaggcaauaacaggguuugu.....             | 2   | 0 | seq |
| .....uuugaggcaauaacaggguuugGg.....            | 1   | 1 | seq |
| .....uuugaggcaauaacaggguuuguA.....            | 1   | 1 | seq |
| .....uuugaggcaauaacaggguGugug.....            | 2   | 1 | seq |
| .....uuugaggcaauaacaggguuugug.....            | 3   | 0 | seq |
| .....uuugaggcaauaacaggguAugug.....            | 5   | 1 | seq |
| .....uuugaggcaauaacaggguuugugau.....          | 1   | 0 | seq |
| .....uuugaggcaauaacaggguuugugaug.....         | 1   | 0 | seq |
| .....uCugaggcaauaacaggguuugugaugc.....        | 1   | 1 | seq |
| .....uCgaggcaauaacagggu.....                  | 1   | 1 | seq |

## Mature

## Star

cuagcuacguggagguuccccuucacgaccaacuucuuagagggacuaugauuguuuaggccauggauuuuagggcauaacagguuuugaugcccuuagauguuc

|                                                           |     |   |     |
|-----------------------------------------------------------|-----|---|-----|
| .....uugaggcauaa <u>cG</u> ggu.....                       | 1   | 1 | seq |
| .....Augaggcauaa <u>ac</u> aggu.....                      | 1   | 1 | seq |
| .....uugaggcaUuaa <u>ac</u> aggu.....                     | 1   | 1 | seq |
| .....uugaggcauaa <u>ac</u> agguC.....                     | 29  | 1 | seq |
| .....uugaggcauaa <u>ac</u> aggu.....                      | 264 | 0 | seq |
| .....uugaggUaaua <u>ac</u> aggu.....                      | 1   | 1 | seq |
| .....uugaUgcauaa <u>ac</u> aggu.....                      | 1   | 1 | seq |
| .....uugaggcauaa <u>ac</u> agguG.....                     | 2   | 1 | seq |
| .....uugaggcauaa <u>ac</u> agguu.....                     | 17  | 0 | seq |
| .....uugaggcauaa <u>ac</u> agguA.....                     | 3   | 1 | seq |
| .....uugaggcauaa <u>ac</u> agguAu.....                    | 1   | 1 | seq |
| .....uugaggcauaa <u>ac</u> agguuu.....                    | 1   | 0 | seq |
| .....uugaggcauaa <u>ac</u> agguGug.....                   | 1   | 1 | seq |
| .....uugaggcauaa <u>ac</u> agguuuU.....                   | 1   | 1 | seq |
| .....uugaggcauaa <u>ac</u> agguuG.....                    | 1   | 1 | seq |
| .....uugaggcauaa <u>ac</u> agguuuUu.....                  | 1   | 1 | seq |
| .....uugaggcauaa <u>ac</u> agguuuugu.....                 | 1   | 0 | seq |
| .....uugaggcauaa <u>ac</u> agguAugu.....                  | 2   | 1 | seq |
| .....uugaggcauaa <u>ac</u> agguuuugu.....                 | 2   | 0 | seq |
| .....uugaggcauaa <u>ac</u> agguuuugugaugcccuuagauuu.....  | 1   | 0 | seq |
| .....uugaggcauaa <u>ac</u> agguuuugugaugcccuuagauuuU..... | 1   | 1 | seq |
| .....ugaggcauaa <u>ac</u> agguu.....                      | 20  | 0 | seq |
| .....ugaggcauaa <u>ac</u> agguCu.....                     | 1   | 1 | seq |
| .....ugaggcauaa <u>ac</u> agguA.....                      | 4   | 1 | seq |
| .....ugaggcauaa <u>ac</u> agguuuug.....                   | 1   | 0 | seq |
| .....ugaggcauaa <u>ac</u> agguuuugu.....                  | 3   | 0 | seq |
| .....ugaggcauaa <u>ac</u> agguAugu.....                   | 1   | 1 | seq |
| .....gaggcauaa <u>ac</u> agguuuugu.....                   | 1   | 0 | seq |
| .....gaggcauaa <u>ac</u> agguGugug.....                   | 2   | 1 | seq |
| .....gaggcauaa <u>ac</u> agguuuuguA.....                  | 1   | 1 | seq |
| .....gaggcauaa <u>ac</u> agguuuugu.....                   | 3   | 0 | seq |
| .....gaggcauuGacagguuuugu.....                            | 1   | 1 | seq |
| .....gaggcauaa <u>ac</u> agguAugu.....                    | 3   | 1 | seq |
| .....gaggcauaa <u>ac</u> agguAugugaug.....                | 1   | 1 | seq |
| .....aggcauaa <u>ac</u> agguuuuguA.....                   | 1   | 1 | seq |
| .....aggcauaa <u>ac</u> agguuuugu.....                    | 2   | 0 | seq |
| .....ggcauaa <u>ac</u> agguuuugu.....                     | 2   | 0 | seq |
| .....ggcauaa <u>ac</u> agguGugu.....                      | 1   | 1 | seq |
| .....ggcauaa <u>ac</u> agguAugu.....                      | 1   | 1 | seq |
| .....ggcauaa <u>ac</u> agguuuugu.....                     | 2   | 0 | seq |
| .....ggcauaa <u>ac</u> agguGugug.....                     | 1   | 1 | seq |
| .....ggcauaa <u>ac</u> agguAugu.....                      | 1   | 1 | seq |
| .....ggcauaa <u>ac</u> agguAugugaug.....                  | 1   | 1 | seq |
| .....ggcauaa <u>ac</u> agguuuugugaug.....                 | 4   | 0 | seq |
| .....gcauaa <u>ac</u> agguAugu.....                       | 3   | 1 | seq |
| .....gcauaa <u>ac</u> agguuuugu.....                      | 4   | 0 | seq |
| .....gcauaa <u>ac</u> agguuuuguga.....                    | 3   | 0 | seq |
| .....gcauaa <u>ac</u> agguAuguga.....                     | 2   | 1 | seq |
| .....gcauaa <u>ac</u> agguuuugugaC.....                   | 1   | 1 | seq |
| .....gcauaa <u>ac</u> agguAugugaug.....                   | 1   | 1 | seq |
| .....cauaa <u>ac</u> agguuuuguga.....                     | 1   | 0 | seq |
| .....cauaa <u>ac</u> agguAugugaugcc.....                  | 1   | 1 | seq |
| .....cauaa <u>ac</u> agguuuugugaugccc.....                | 1   | 0 | seq |
| .....cauaa <u>ac</u> agguAugugaugcccuuagaug.....          | 1   | 1 | seq |
| .....cauaa <u>ac</u> agguuuugugaugcccuuagaugu.....        | 1   | 0 | seq |
| .....aaua <u>ac</u> agguuuugugaug.....                    | 1   | 0 | seq |
| .....aaua <u>ac</u> agguuuugugaugccc.....                 | 1   | 0 | seq |
| .....aaua <u>ac</u> agguuuugugaugcccA.....                | 1   | 1 | seq |
| .....aua <u>ac</u> agguuuugugaug.....                     | 2   | 0 | seq |
| .....aua <u>ac</u> agguCuugugaugc.....                    | 1   | 1 | seq |
| .....aua <u>ac</u> agguuuugugaugcc.....                   | 1   | 0 | seq |
| .....aua <u>ac</u> agguuuugugaugcccuu.....                | 1   | 0 | seq |
| .....aua <u>ac</u> agguuuugugaugcccuuaga.....             | 3   | 0 | seq |
| .....aua <u>ac</u> agguuuugugaugcccuuagaug.....           | 3   | 0 | seq |
| .....aua <u>ac</u> agguuuugugaugcccuuagaugu.....          | 1   | 0 | seq |
| .....ua <u>ac</u> agguuuugugaugc.....                     | 1   | 0 | seq |
| .....ua <u>ac</u> agguGugugaugcc.....                     | 1   | 1 | seq |
| .....ua <u>ac</u> agguGugugaugccc.....                    | 1   | 1 | seq |
| .....ua <u>ac</u> agguuuugugaugccU.....                   | 2   | 1 | seq |
| .....ua <u>ac</u> agguuuugugaugcccuu.....                 | 2   | 0 | seq |

## Mature

## Star

|                                                                                                                                                                  |    |   |     |
|------------------------------------------------------------------------------------------------------------------------------------------------------------------|----|---|-----|
| cuagcuacguggagguuccccuucacgaccaa <u>cuucuuagaggga</u> cu <u>augauuguuuaggcca</u> ugga <u>uuuugaggc</u> aa <u>uaacagguuu</u> ug <u>gaugcccuu</u> agau <u>guuc</u> |    |   |     |
| .....uaacagguGugugaugcccuu.....                                                                                                                                  | 1  | 1 | seq |
| .....uaacagguGugugaugcccuu.....                                                                                                                                  | 1  | 1 | seq |
| .....uaacagguuuugugaugcccuu.....                                                                                                                                 | 1  | 0 | seq |
| .....uaacagguuuugugaugcccuuaga....                                                                                                                               | 1  | 0 | seq |
| .....uaacagguGugugaugcccuuagau... 16                                                                                                                             | 1  | 1 | seq |
| .....uaacagguuuugugaugcccuuagau... 9                                                                                                                             | 9  | 0 | seq |
| .....uaacaggCuugugaugcccuuagau... 1                                                                                                                              | 1  | 1 | seq |
| .....uaacagguNugugaugcccuuagau... 1                                                                                                                              | 1  | 1 | seq |
| .....uaacagguGugugaugcccuuagau... 3                                                                                                                              | 3  | 1 | seq |
| .....uaacagguuuugugaugcccuuagau... 6                                                                                                                             | 6  | 0 | seq |
| .....uaacagguuuugugaugcccuuagauC. 1                                                                                                                              | 1  | 1 | seq |
| .....uaacagguGugugaugcccuuagauuu. 4                                                                                                                              | 4  | 1 | seq |
| .....aacagguuuugugaAgcccuuagau... 1                                                                                                                              | 1  | 1 | seq |
| .....aacagguuuugugaugcccuuagau... 2                                                                                                                              | 2  | 0 | seq |
| .....aacagguuuugugaugcccuuagauC. 2                                                                                                                               | 2  | 1 | seq |
| .....acagguuuugugaugcccuu..... 1                                                                                                                                 | 1  | 0 | seq |
| .....acagguuuugugaugcccuu..... 1                                                                                                                                 | 1  | 0 | seq |
| .....acagguuuugugaugcccuuaga.... 1                                                                                                                               | 1  | 0 | seq |
| .....acagguuuugugaugcccuuagau... 1                                                                                                                               | 1  | 0 | seq |
| .....acagguuuugugaugcccuuagau... 7                                                                                                                               | 7  | 0 | seq |
| .....acagguuuugCgaugcccuuagau... 1                                                                                                                               | 1  | 1 | seq |
| .....acagguuuugugaugcccuuagau... 3                                                                                                                               | 3  | 0 | seq |
| .....acagguuuugugaugcccuuagauuu. 3                                                                                                                               | 3  | 0 | seq |
| .....acagguuuugugaugcccuuagauuuu 2                                                                                                                               | 2  | 0 | seq |
| .....cagguGugugaugcccuu..... 5                                                                                                                                   | 5  | 1 | seq |
| .....cagguuuugugaugcccuu..... 6                                                                                                                                  | 6  | 0 | seq |
| .....cagguuuugugaugcccuu..... 3                                                                                                                                  | 3  | 0 | seq |
| .....cagguuuugugaugcccuuaga.... 1                                                                                                                                | 1  | 0 | seq |
| .....cagguuuugugaugcccuuagau... 1                                                                                                                                | 1  | 0 | seq |
| .....cagguGugugaugcccuuagau... 2                                                                                                                                 | 2  | 1 | seq |
| .....cGgguuuugugaugcccuuagau... 1                                                                                                                                | 1  | 1 | seq |
| .....cagguuuugugaugcccuuagau... 13                                                                                                                               | 13 | 0 | seq |
| .....cagguuuugugaugcccuuagauGg. 1                                                                                                                                | 1  | 1 | seq |
| .....cagguuuugugaugcccuuagauA. 1                                                                                                                                 | 1  | 1 | seq |
| .....cagguGugugaugcccuuagau... 1                                                                                                                                 | 1  | 1 | seq |
| .....cagguuuugugaugcccuuagauC. 1                                                                                                                                 | 1  | 1 | seq |
| .....cagguuuugugaugcccuuagau... 11                                                                                                                               | 11 | 0 | seq |
| .....cagguuuugugaugcccuuagauuu. 9                                                                                                                                | 9  | 0 | seq |
| .....cagguuuugugaugcccuuagauC. 2                                                                                                                                 | 2  | 1 | seq |
| .....cagguGugugaugcccuuagauuu. 2                                                                                                                                 | 2  | 1 | seq |
| .....cagguuuugugaugcccuuagauuuu 2                                                                                                                                | 2  | 0 | seq |
| .....cagguGugugaugcccuuagauuuu 1                                                                                                                                 | 1  | 1 | seq |
| .....agguGugugaugcccuuag. 1                                                                                                                                      | 1  | 1 | seq |
| .....agguuuugugaugcccuuag. 1                                                                                                                                     | 1  | 0 | seq |
| .....agguuuugugaugcccuuagau... 3                                                                                                                                 | 3  | 0 | seq |
| .....agguGugugaugcccuuagau... 2                                                                                                                                  | 2  | 1 | seq |
| .....agguuuugugaugcccuuagau... 1                                                                                                                                 | 1  | 0 | seq |
| .....agguGugugaugcccuuagau... 1                                                                                                                                  | 1  | 1 | seq |
| .....agguuuugugaugcccuuagauC. 1                                                                                                                                  | 1  | 1 | seq |
| .....agguuuugugGugcccuuagauuu. 1                                                                                                                                 | 1  | 1 | seq |
| .....agguuuugugaugcccuuagauuuu 1                                                                                                                                 | 1  | 0 | seq |
| .....gguuuugugaugcccuuagau... 2                                                                                                                                  | 2  | 0 | seq |
| .....gguGugugaugcccuuagauuuu 1                                                                                                                                   | 1  | 1 | seq |
| .....uuugugaugcccuuagau... 1                                                                                                                                     | 1  | 0 | seq |
| .....uuugugaugcccuuagau... 1                                                                                                                                     | 1  | 0 | seq |
| .....uuugugaugcccuuagauA. 1                                                                                                                                      | 1  | 1 | seq |
| .....uugugaugcccuuGgau... 1                                                                                                                                      | 1  | 1 | seq |
| .....Gugugaugcccuuagau... 1                                                                                                                                      | 1  | 1 | seq |
| .....uugugaugcccuuagau... 1                                                                                                                                      | 1  | 0 | seq |
| .....ugugaugcccuuagaCg... 2                                                                                                                                      | 2  | 1 | seq |
| .....ugugaugcccuuagGug... 1                                                                                                                                      | 1  | 1 | seq |
| .....ugCgaugcccuuagau... 1                                                                                                                                       | 1  | 1 | seq |
| .....ugugaugcccAuaug... 1                                                                                                                                        | 1  | 1 | seq |
| .....ugugaugcccuuagauC. 1                                                                                                                                        | 1  | 1 | seq |
| .....ugugGugcccuuagau... 1                                                                                                                                       | 1  | 1 | seq |
| .....ugugaugcccuuagauA. 11                                                                                                                                       | 11 | 1 | seq |
| .....ugugaugcccCuagau... 1                                                                                                                                       | 1  | 1 | seq |
| .....Agugaugcccuuagau... 1                                                                                                                                       | 1  | 1 | seq |
| .....ugugaugcccuuagaGg... 3                                                                                                                                      | 3  | 1 | seq |
| .....ugugaugcccuCagaug... 2                                                                                                                                      | 2  | 1 | seq |



## Mature

## Star

cuagcuacguggagguuccccuucacgaaccaacuucuuagagggaacuaugauuguuuuaggccauggaauuuugaggcaauaacagguuugugaugcccuuagauguuc

|                             |     |   |     |
|-----------------------------|-----|---|-----|
| .....ugugCugcccuuagaug...   | 1   | 1 | seq |
| .....ugugaugcccuuagaug...   | 246 | 0 | seq |
| .....ugugaugcccuuagaAg...   | 1   | 1 | seq |
| .....ugugaugcccuuagaugC...  | 24  | 1 | seq |
| .....ugGgaugcccuuagaugu...  | 1   | 1 | seq |
| .....ugugaugcccuuagaugA...  | 1   | 1 | seq |
| .....ugugaugcccuuagaugG...  | 5   | 1 | seq |
| .....ugugaugcccGuagaugu...  | 1   | 1 | seq |
| .....ugugaugcccuCagaugu...  | 1   | 1 | seq |
| .....ugAgaugcccuuagaugu...  | 1   | 1 | seq |
| .....ugugaCgcccuuagaugu...  | 1   | 1 | seq |
| .....ugugaugcccuuagaugu...  | 132 | 0 | seq |
| .....Agugaugcccuuagauguu... | 1   | 1 | seq |
| .....ugugaugcccuuagauguC... | 12  | 1 | seq |
| .....ugGgaugcccuuagauguu... | 1   | 1 | seq |
| .....ugugaugcccuuagauguG... | 4   | 1 | seq |
| .....ugugaugcccuuagauguu... | 117 | 0 | seq |
| .....ugugaugcccuuagaCguu... | 1   | 1 | seq |
| .....ugugaugcccuuagauguuc   | 153 | 0 | seq |
| .....ugugaCgcccuuagauguuc   | 1   | 1 | seq |
| .....ugugaugcccuuagauAuuc   | 1   | 1 | seq |
| .....Agugaugcccuuagauguuc   | 1   | 1 | seq |
| .....ugugGugcccuuagauguuc   | 1   | 1 | seq |
| .....Ggugaugcccuuagauguuc   | 1   | 1 | seq |
| .....gugGugcccuuagaugu...   | 1   | 1 | seq |
| .....gugaugcccuuagaugu...   | 93  | 0 | seq |
| .....gugaugcccuuagaugG...   | 2   | 1 | seq |
| .....gugaugcccuuagaugC...   | 19  | 1 | seq |
| .....gugaugcccuuagGugu...   | 1   | 1 | seq |
| .....gugaugcccuuagauguA...  | 3   | 1 | seq |
| .....gugaugcccuuagauguC...  | 15  | 1 | seq |
| .....gugaugcccuuagaugCu...  | 1   | 1 | seq |
| .....gugaugcccuuagagGguu... | 1   | 1 | seq |
| .....gugaugcccuuagauguu...  | 100 | 0 | seq |
| .....gugaugcccuuagauguG...  | 1   | 1 | seq |
| .....gugaugcccuuagauguuc    | 107 | 0 | seq |
| .....gugauAcccuuagauguuc    | 1   | 1 | seq |
| .....gugaugcccCuagauguuc    | 1   | 1 | seq |
| .....gugaCgcccuuagauguuc    | 1   | 1 | seq |
| .....gugaugcccuuagGuguuc    | 1   | 1 | seq |
| .....gugGugcccuuagauguuc    | 1   | 1 | seq |
| .....ugaugcccuuagauguA...   | 3   | 1 | seq |
| .....ugaugcccuuagGuguu...   | 1   | 1 | seq |
| .....ugaugcccuuagauguG...   | 1   | 1 | seq |
| .....ugaugcccuuagauguC...   | 18  | 1 | seq |
| .....ugaugcccuuagauguu...   | 179 | 0 | seq |
| .....Ggaugcccuuagauguu...   | 1   | 1 | seq |
| .....ugaugcccuuagaugAuuc    | 1   | 1 | seq |
| .....ugGugcccuuagauguuc     | 1   | 1 | seq |
| .....ugaugcccuuUgauguuc     | 1   | 1 | seq |
| .....ugaugcccuuagauguuc     | 108 | 0 | seq |
| .....gaugccUuuagauguuc      | 1   | 1 | seq |
| .....gaugcccuuagauguuc      | 39  | 0 | seq |

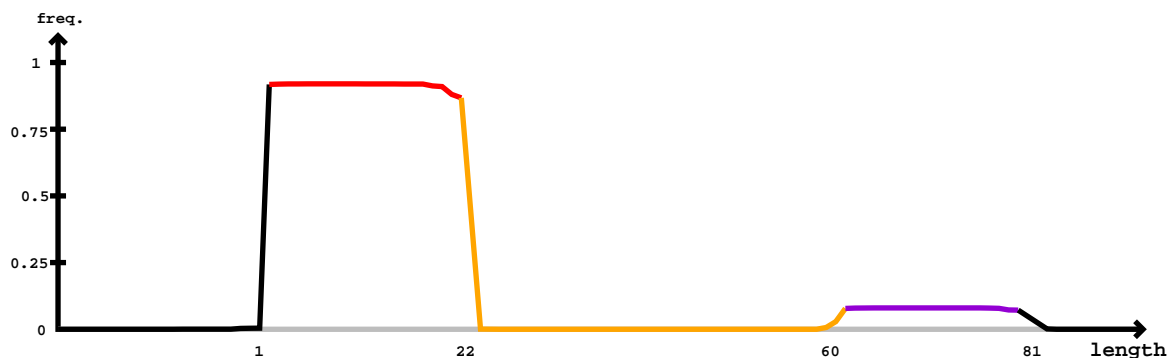

Star

[illegible]

## Mature

## Star

|                      |                          |                         |                           |                 |     |   |     |
|----------------------|--------------------------|-------------------------|---------------------------|-----------------|-----|---|-----|
| caggagaagaggaggcacac | ugagaaggcgaucaacaugac    | aaggaucauugcugcggcugaau | uuuguggucauuuugaucgcccuuu | cagucugccucuuau |     |   |     |
| .....                | ugagaaggcgauUaacaugac    | .....                   |                           |                 | 2   | 1 | seq |
| .....                | ugagaaggUgaucaacaugac    | .....                   |                           |                 | 2   | 1 | seq |
| .....                | Cgagaaggcgaucaacaugac    | .....                   |                           |                 | 6   | 1 | seq |
| .....                | Agagaaggcgaucaacaugac    | .....                   |                           |                 | 3   | 1 | seq |
| .....                | ugagaaggcgaucaacaugUc    | .....                   |                           |                 | 2   | 1 | seq |
| .....                | ugaUaaggcgaucaacaugac    | .....                   |                           |                 | 1   | 1 | seq |
| .....                | ugUgaaggcgaucaacaugac    | .....                   |                           |                 | 1   | 1 | seq |
| .....                | ugagaGggcgaucaacaugac    | .....                   |                           |                 | 9   | 1 | seq |
| .....                | uUagaaggcgaucaacaugac    | .....                   |                           |                 | 2   | 1 | seq |
| .....                | ugagaaggcgCaucaacaugac   | .....                   |                           |                 | 1   | 1 | seq |
| .....                | ugagaaggcgauCacaugac     | .....                   |                           |                 | 5   | 1 | seq |
| .....                | ugagaaggcgauCacaugac     | .....                   |                           |                 | 1   | 1 | seq |
| .....                | ugagaaggcgaucaacaCac     | .....                   |                           |                 | 1   | 1 | seq |
| .....                | Ggagaaggcgaucaacaugac    | .....                   |                           |                 | 6   | 1 | seq |
| .....                | ugGgaaggcgaucaacaugac    | .....                   |                           |                 | 13  | 1 | seq |
| .....                | ugagaaggcgGucaacaugac    | .....                   |                           |                 | 4   | 1 | seq |
| .....                | ugagaaggcgaucaacaugaU    | .....                   |                           |                 | 87  | 1 | seq |
| .....                | Ngagaaggcgaucaacaugac    | .....                   |                           |                 | 1   | 1 | seq |
| .....                | ugagUaggcgaucaacaugac    | .....                   |                           |                 | 2   | 1 | seq |
| .....                | ugagaaggcgaucaGcaugac    | .....                   |                           |                 | 6   | 1 | seq |
| .....                | ugagaaggcgaucaacaugaca   | .....                   |                           |                 | 7   | 0 | seq |
| .....                | ugagaaggcgaucaacaugacC   | .....                   |                           |                 | 4   | 1 | seq |
| .....                | ugagaaggcgaucaacaugacU   | .....                   |                           |                 | 16  | 1 | seq |
| .....                | ugagaaggcgaucaacaugacG   | .....                   |                           |                 | 3   | 1 | seq |
| .....                | ugagaaggcgaucaacaugaUa   | .....                   |                           |                 | 1   | 1 | seq |
| .....                | ugagaaggcgaucaacaugacaG  | .....                   |                           |                 | 1   | 1 | seq |
| .....                | ugagaaggcgaucaacaugacCag | .....                   |                           |                 | 1   | 1 | seq |
| .....                | gagaaggcgaucaacaug       | .....                   |                           |                 | 2   | 0 | seq |
| .....                | gagaaggcgaucaacauga      | .....                   |                           |                 | 1   | 0 | seq |
| .....                | gagaaggcgaucaacaugac     | .....                   |                           |                 | 1   | 0 | seq |
| .....                | agaaggcgaucaacaugac      | .....                   |                           |                 | 1   | 0 | seq |
| .....                | agaaggcgaucaacaugaU      | .....                   |                           |                 | 1   | 1 | seq |
| .....                | aaggcgaucaacaugac        | .....                   |                           |                 | 1   | 0 | seq |
| .....                |                          | ucauuugaucgccCuu        | .....                     |                 | 2   | 1 | seq |
| .....                |                          | ucauuugaucgccCuuu       | .....                     |                 | 2   | 1 | seq |
| .....                |                          | ucauuugaucgccCuuuc      | .....                     |                 | 3   | 1 | seq |
| .....                |                          | ucauuugaucgccCuuucag    | .....                     |                 | 9   | 1 | seq |
| .....                |                          | ucauuugaucgccCuuucagu   | .....                     |                 | 5   | 1 | seq |
| .....                |                          | cauuuugaucgccCuuu       | .....                     |                 | 1   | 1 | seq |
| .....                |                          | cauuuugaucgccCuuuc      | .....                     |                 | 6   | 1 | seq |
| .....                |                          | cauuuugaucgccCuuuca     | .....                     |                 | 2   | 1 | seq |
| .....                |                          | cauuuugaucgccCuuucagu   | .....                     |                 | 60  | 1 | seq |
| .....                |                          | auuuuugaucgccCuuuc      | .....                     |                 | 10  | 1 | seq |
| .....                |                          | auuuuugaucgccCuuucag    | .....                     |                 | 2   | 1 | seq |
| .....                |                          | auuuuugaucgccCuuucagu   | .....                     |                 | 143 | 1 | seq |
| .....                |                          | uuuuuugaucgccCuuucag    | .....                     |                 | 1   | 1 | seq |
| .....                |                          | uuuuuugaucgccCuuucagucu | .....                     |                 | 3   | 1 | seq |
| .....                |                          | auuuuugaucgccCuuucagucu | .....                     |                 | 1   | 1 | seq |
| .....                |                          | uuuuuugaucgccCuuucagu   | .....                     |                 | 1   | 1 | seq |

Provisional ID : MA\_588365\_30702  
Score total : 2.5  
Score for star read(s) : -1.3  
Score for read counts : 0  
Score for mfe : 2.2  
Score for randfold : 1.6  
Score for cons. seed :  
Total read count : 17  
Mature read count : 17  
Loop read count : 0  
Star read count : 0

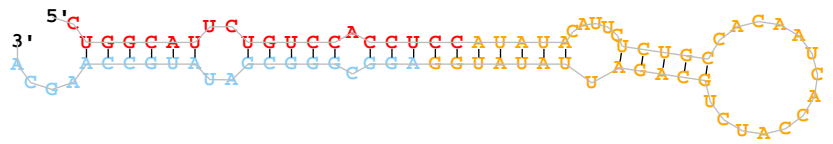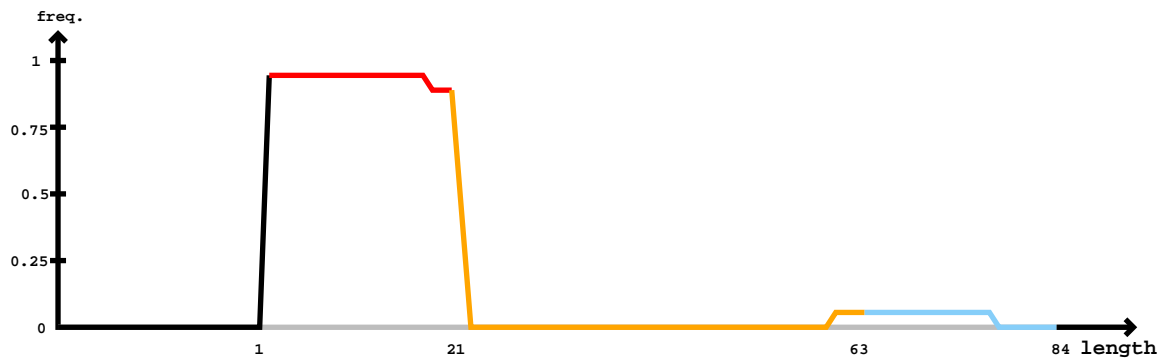

**Mature**

**Star**

| 5' -                                                                                                        | exp | reads | mm | sample |
|-------------------------------------------------------------------------------------------------------------|-----|-------|----|--------|
| aaaacuucuccagagagugcuggcauucuguccaccuccauauacauucucugccacaauccaucugcagauuauauggaggcgggcgauaugccaagcaagcucug | -3' |       |    |        |
| .....((((((.....((((((((((((((((((((.....((((((((.....))))))))))))))))))))))))))))))))))))                  |     | 1     | 0  | seq    |
| .....cuggcauucuguccacc.....                                                                                 |     | 1     | 1  | seq    |
| .....Guggcauucuguccaccucc.....                                                                              |     | 3     | 1  | seq    |
| .....cuggcauucuguccaccucU.....                                                                              |     | 5     | 0  | seq    |
| .....cuggcauucuguccaccucc.....                                                                              |     | 2     | 1  | seq    |
| .....cuggcauucCguccaccucca.....                                                                             |     | 4     | 0  | seq    |
| .....cuggcauucuguccaccucca.....                                                                             |     | 1     | 1  | seq    |
| .....cuggcauucuguccaccuccC.....                                                                             |     | 1     | 1  | seq    |
| .....uggagggCggcgauaug.....                                                                                 |     | 1     | 1  | seq    |

Provisional ID : MA\_5903755\_42030  
 Score total : 2380.2  
 Score for star read(s) : 3.9  
 Score for read counts : 2372.3  
 Score for mfe : 2.4  
 Score for randfold : 1.6  
 Score for cons. seed :  
 Total read count : 4665  
 Mature read count : 4403  
 Loop read count : 0  
 Star read count : 262

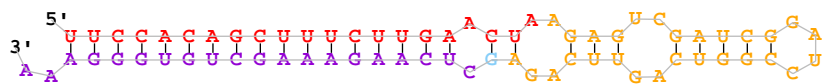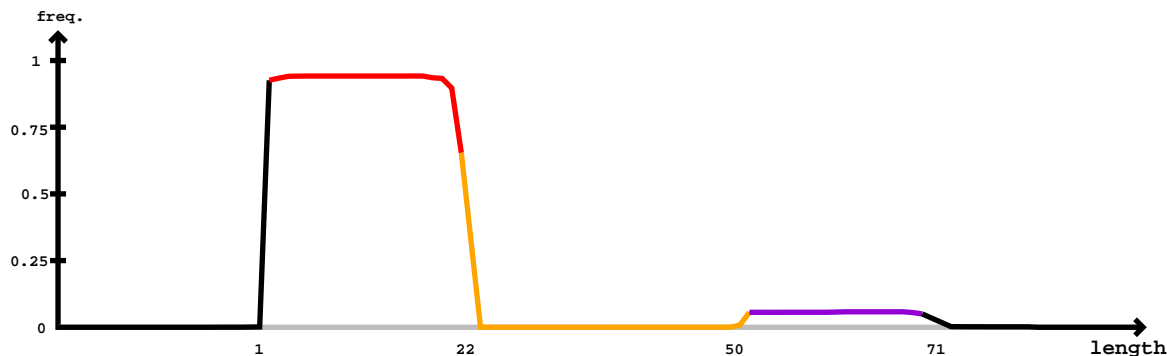

## Mature

## Star

| 5' -                                                                                                                   | reads | mm | sample |
|------------------------------------------------------------------------------------------------------------------------|-------|----|--------|
| cgaugaaucgccaugcuc <u>uuccacagcuuuuugaacuaaagagucgaucggauccggucaguuucagagcucaagaaagcugugggaaaacaugggcggauucgaugauc</u> | 1     | 0  | seq    |
| cgaugaaucgccaugcuc <u>uuccacagcuuuuugaacuaaagagucgaucggauccggucaguuucagagcucaagaaagcugugggaaaacaugggcggauucgaugauc</u> | 1     | 0  | seq    |
| (((((((((((.....(((((((((((((((((((.....)))))).....))))))))))))))))))))))))))))))))))))))))))))))))))))))))))..        | 1     | 0  | seq    |
| .....ugcucuuccacagcuuuuug.....                                                                                         | 1     | 0  | seq    |
| .....ucuuuccacagcuuuuugaac.....                                                                                        | 1     | 0  | seq    |
| .....ucuuuccacagcuuuuugaacu.....                                                                                       | 1     | 0  | seq    |
| .....cuuccacagcuuuuugaacuC.....                                                                                        | 1     | 1  | seq    |
| .....cuuccacagcuuuuugaacuU.....                                                                                        | 1     | 1  | seq    |
| .....uuccacagcuuuuugG.....                                                                                             | 2     | 1  | seq    |
| .....uuccacagcuuuuuga.....                                                                                             | 28    | 0  | seq    |
| .....uuccacagcuuuuugaa.....                                                                                            | 12    | 0  | seq    |
| .....uuccacagcuuuuugaau.....                                                                                           | 7     | 1  | seq    |
| .....uuccacagcuuuuugaac.....                                                                                           | 1     | 1  | seq    |
| .....uuccacagcuuuuugaac.....                                                                                           | 1     | 1  | seq    |
| .....uuccacagcuuuuugaac.....                                                                                           | 136   | 0  | seq    |
| .....uuccacagcuuuuucGaac.....                                                                                          | 1     | 1  | seq    |
| .....uuccacagcuuuuucGuaac.....                                                                                         | 1     | 1  | seq    |
| .....uGccacagcuuuuugaac.....                                                                                           | 1     | 1  | seq    |
| .....uuccGcagcuuuuugaac.....                                                                                           | 1     | 1  | seq    |
| .....uuccGcagcuuuuugaacu.....                                                                                          | 3     | 1  | seq    |
| .....uuccacagcuuuuugaacu.....                                                                                          | 3     | 1  | seq    |
| .....Guccacagcuuuuugaacu.....                                                                                          | 1     | 1  | seq    |
| .....Cuccacagcuuuuugaacu.....                                                                                          | 8     | 1  | seq    |
| .....Auccacagcuuuuugaacu.....                                                                                          | 1     | 1  | seq    |
| .....uAccacagcuuuuugaacu.....                                                                                          | 1     | 1  | seq    |
| .....uCccacagcuuuuugaacu.....                                                                                          | 6     | 1  | seq    |
| .....uuccacagcuuuuugaacu.....                                                                                          | 1     | 1  | seq    |
| .....uuccacagcuuuuucGuaacu.....                                                                                        | 2     | 1  | seq    |
| .....uuccacagcuuuuucCuugaacu.....                                                                                      | 2     | 1  | seq    |
| .....uuccacagcuuuuugaacC.....                                                                                          | 153   | 1  | seq    |
| .....uuccacagcuuuuugaau.....                                                                                           | 3     | 1  | seq    |
| .....uuccacagcuuuuugaacu.....                                                                                          | 1     | 1  | seq    |
| .....uuccaUagcuuuuugaacu.....                                                                                          | 2     | 1  | seq    |
| .....uuccacagcuuuuucGaacu.....                                                                                         | 1     | 1  | seq    |
| .....uuccacagcuuuuugaacG.....                                                                                          | 24    | 1  | seq    |
| .....uuccacagcuuuuugaGcu.....                                                                                          | 2     | 1  | seq    |

## Mature

Star

|           |                                               |           |                       |                                                                    |     |  |  |
|-----------|-----------------------------------------------|-----------|-----------------------|--------------------------------------------------------------------|-----|--|--|
| .gaugaauc | cgc                                           | caugcu    | uccacagcuuuucuugaacua | gagagucgauccggucaguucagagcucaagaaagcugugggaaaacaugggcggauucgaugauc |     |  |  |
| . . . . . | . ucccacagcuuuucuugaacA.                      | . . . . . | 23                    | 1                                                                  | seq |  |  |
| . . . . . | . ucccacagcuuuucuugaacu.                      | . . . . . | 848                   | 0                                                                  | seq |  |  |
| . . . . . | . ucccacagcuCucuugaacua.                      | . . . . . | 1                     | 1                                                                  | seq |  |  |
| . . . . . | . ucccacagcuuuucuugaacua.                     | . . . . . | 317                   | 0                                                                  | seq |  |  |
| . . . . . | . ucccacagcuuuucuugaacuC.                     | . . . . . | 2434                  | 1                                                                  | seq |  |  |
| . . . . . | . ucccacagcuuuucuugUacua.                     | . . . . . | 1                     | 1                                                                  | seq |  |  |
| . . . . . | . ucccacUgcuuuucuugaacua.                     | . . . . . | 1                     | 1                                                                  | seq |  |  |
| . . . . . | . ucccacagcuuuucuugaacGa.                     | . . . . . | 1                     | 1                                                                  | seq |  |  |
| . . . . . | . uuUcacagcuuuucuugaacua.                     | . . . . . | 1                     | 1                                                                  | seq |  |  |
| . . . . . | . ucccacagcuuuucuugaGcua.                     | . . . . . | 2                     | 1                                                                  | seq |  |  |
| . . . . . | . ucccGcagcuuuucuugaacua.                     | . . . . . | 1                     | 1                                                                  | seq |  |  |
| . . . . . | . ucccacGgcuuuucuugaacua.                     | . . . . . | 3                     | 1                                                                  | seq |  |  |
| . . . . . | . ucccacagcuuuucuugGacua.                     | . . . . . | 1                     | 1                                                                  | seq |  |  |
| . . . . . | . ucccacagcuuCcuugaacua.                      | . . . . . | 1                     | 1                                                                  | seq |  |  |
| . . . . . | . ucccacagcuuuUuugaacua.                      | . . . . . | 1                     | 1                                                                  | seq |  |  |
| . . . . . | . Cuccacagcuuuucuugaacua.                     | . . . . . | 1                     | 1                                                                  | seq |  |  |
| . . . . . | . ucccacagcuuucuGgaacua.                      | . . . . . | 1                     | 1                                                                  | seq |  |  |
| . . . . . | . ucccacagcuuuucuugaacuN.                     | . . . . . | 1                     | 1                                                                  | seq |  |  |
| . . . . . | . uccaUagcuuuucuugaacua.                      | . . . . . | 1                     | 1                                                                  | seq |  |  |
| . . . . . | . ucccacagcuuucCugaacua.                      | . . . . . | 1                     | 1                                                                  | seq |  |  |
| . . . . . | . ucccacagcuuuucuugaacCa.                     | . . . . . | 5                     | 1                                                                  | seq |  |  |
| . . . . . | . ucccacagcuuuucuuaAacua.                     | . . . . . | 1                     | 1                                                                  | seq |  |  |
| . . . . . | . ucccacagcuuuucuugaacuG.                     | . . . . . | 271                   | 1                                                                  | seq |  |  |
| . . . . . | . ucccacagcuuuucuugaacuaU.                    | . . . . . | 2                     | 1                                                                  | seq |  |  |
| . . . . . | . uccacagcuuuucuugaac.                        | . . . . . | 7                     | 0                                                                  | seq |  |  |
| . . . . . | . uccacUgcuuuucuugaacu.                       | . . . . . | 1                     | 1                                                                  | seq |  |  |
| . . . . . | . uccacagcuuuucuugaacC.                       | . . . . . | 7                     | 1                                                                  | seq |  |  |
| . . . . . | . uccacagcuuuucuugaacu.                       | . . . . . | 20                    | 0                                                                  | seq |  |  |
| . . . . . | . uccacagcuuuucuugaacuC.                      | . . . . . | 1                     | 1                                                                  | seq |  |  |
| . . . . . | . uccacagcuuuucuugaacua.                      | . . . . . | 1                     | 0                                                                  | seq |  |  |
| . . . . . | . ccacagcuuuucuugaaA.                         | . . . . . | 1                     | 1                                                                  | seq |  |  |
| . . . . . | . ccacagcuuuucuugaac.                         | . . . . . | 8                     | 0                                                                  | seq |  |  |
| . . . . . | . ccacagcuuuucuugaatU.                        | . . . . . | 2                     | 1                                                                  | seq |  |  |
| . . . . . | . ccacagcuuuucuugaacu.                        | . . . . . | 18                    | 0                                                                  | seq |  |  |
| . . . . . | . ccacagcuuuucuugaacG.                        | . . . . . | 1                     | 1                                                                  | seq |  |  |
| . . . . . | . ccacagcuuuucuugaacC.                        | . . . . . | 1                     | 1                                                                  | seq |  |  |
| . . . . . | . ccacagcuuuucuugaacuC.                       | . . . . . | 1                     | 1                                                                  | seq |  |  |
| . . . . . | . cacagcuuuucuugaacC.                         | . . . . . | 1                     | 1                                                                  | seq |  |  |
| . . . . . | . cacagcuuuucuugaacu.                         | . . . . . | 1                     | 0                                                                  | seq |  |  |
| . . . . . | . cacagcuuuucuugaacuC.                        | . . . . . | 1                     | 1                                                                  | seq |  |  |
| . . . . . | . acagcuuuucuugaacuC.                         | . . . . . | 2                     | 1                                                                  | seq |  |  |
| . . . . . | . . . . . gaacuaagagucgauccggucaguucagagcu.   | . . . . . | 1                     | 0                                                                  | seq |  |  |
| . . . . . | . . . . . cggucaguuacagagcucaagaaagcugugggaa. | . . . . . | 1                     | 0                                                                  | seq |  |  |
| . . . . . | . . . . . gcucaagaaagcuguggA.                 | . . . . . | 1                     | 1                                                                  | seq |  |  |
| . . . . . | . . . . . gcucaagaaagcuguggg.                 | . . . . . | 2                     | 0                                                                  | seq |  |  |
| . . . . . | . . . . . gcucaagaaagcuguggga.                | . . . . . | 2                     | 0                                                                  | seq |  |  |
| . . . . . | . . . . . gcucaagaaagcugugggaa.               | . . . . . | 2                     | 0                                                                  | seq |  |  |
| . . . . . | . . . . . gcucaagaaagcugugggaaa.              | . . . . . | 25                    | 0                                                                  | seq |  |  |
| . . . . . | . . . . . gUucaagaaagcugugggaaa.              | . . . . . | 1                     | 1                                                                  | seq |  |  |
| . . . . . | . . . . . gcucaagaaagcugugggaaG.              | . . . . . | 1                     | 1                                                                  | seq |  |  |
| . . . . . | . . . . . cucGagaaagcuguggg.                  | . . . . . | 1                     | 1                                                                  | seq |  |  |
| . . . . . | . . . . . cucaagaaagcuguggg.                  | . . . . . | 9                     | 0                                                                  | seq |  |  |
| . . . . . | . . . . . cucaagaaagcuguggga.                 | . . . . . | 20                    | 0                                                                  | seq |  |  |
| . . . . . | . . . . . cucaagaaGgcuguggga.                 | . . . . . | 1                     | 1                                                                  | seq |  |  |
| . . . . . | . . . . . Uucaagaaagcuguggga.                 | . . . . . | 1                     | 1                                                                  | seq |  |  |
| . . . . . | . . . . . cucaagaaagcugugggaG.                | . . . . . | 2                     | 1                                                                  | seq |  |  |
| . . . . . | . . . . . cucGagaaagcugugggaa.                | . . . . . | 1                     | 1                                                                  | seq |  |  |
| . . . . . | . . . . . cucaagaaagcugugggaU.                | . . . . . | 1                     | 1                                                                  | seq |  |  |
| . . . . . | . . . . . cucaagaaagcugugggaa.                | . . . . . | 19                    | 0                                                                  | seq |  |  |
| . . . . . | . . . . . cucaagaaagcugugggaaa.               | . . . . . | 152                   | 0                                                                  | seq |  |  |
| . . . . . | . . . . . cucaagaaagcugugggaaG.               | . . . . . | 4                     | 1                                                                  | seq |  |  |
| . . . . . | . . . . . cucaagaGagcugugggaaa.               | . . . . . | 1                     | 1                                                                  | seq |  |  |
| . . . . . | . . . . . cucaagaaagcugugggaGa.               | . . . . . | 1                     | 1                                                                  | seq |  |  |
| . . . . . | . . . . . cucaagaaagcuAugggaaa.               | . . . . . | 1                     | 1                                                                  | seq |  |  |
| . . . . . | . . . . . cCcaagaaagcugugggaaa.               | . . . . . | 1                     | 1                                                                  | seq |  |  |
| . . . . . | . . . . . cucaagaaaAcugugggaaa.               | . . . . . | 1                     | 1                                                                  | seq |  |  |
| . . . . . | . . . . . cucaagaaagcGugggaaa.                | . . . . . | 1                     | 1                                                                  | seq |  |  |
| . . . . . | . . . . . cucaagaaUgcugugggaaa.               | . . . . . | 1                     | 1                                                                  | seq |  |  |
| . . . . . | . . . . . cucaagaaagcugCgggaaa.               | . . . . . | 1                     | 1                                                                  | seq |  |  |
| . . . . . | . . . . . cucaagaaagcugugggaaaU.              | . . . . . | 3                     | 1                                                                  | seq |  |  |

Mature

Star

|                                                                                                                                   |   |   |     |
|-----------------------------------------------------------------------------------------------------------------------------------|---|---|-----|
| cgaugaaucccgccaugcuc <u>uuccacagcuuuc</u> uugaacuaagagucgaucggauccggucag <u>uucagagcu</u> aagaaagcugugggaaaaacaugggcggauucgaugauc |   |   |     |
| .....cucaagaaagcugugggaaCa.....                                                                                                   | 1 | 1 | seq |
| .....cucaagaaagcugugggaaaC.....                                                                                                   | 1 | 1 | seq |
| .....cucaagaaagcugugggaaGaca.....                                                                                                 | 1 | 1 | seq |
| .....ucaagaaagcugugggaa.....                                                                                                      | 1 | 0 | seq |
| .....ucaagaaagcugugggaaaac.....                                                                                                   | 1 | 0 | seq |
| .....agaaagcugugggaaaacaug.....                                                                                                   | 1 | 0 | seq |
| .....gcugugggaaaacauggAcgg.....                                                                                                   | 3 | 1 | seq |
| .....cugugggaaaacauggAcgg.....                                                                                                    | 5 | 1 | seq |

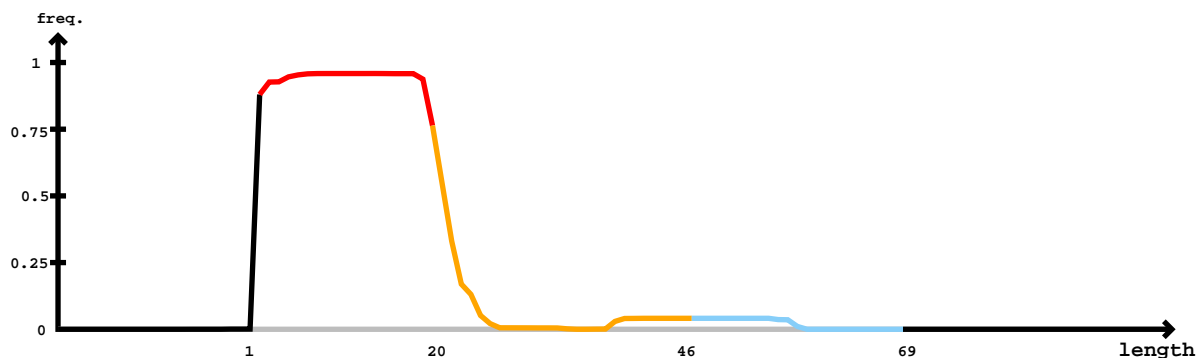

Star



## Mature

## Star

agaagauugaugauuuuuau~~ggggau~~guagcucauaugguagugcucgcuuaucaugcgcagag~~guaugggg~~gaucuauacccccacauaucccaucaucaagcccauucuaauuc

|                                                           |      |   |     |
|-----------------------------------------------------------|------|---|-----|
| .....ggggaugua <u>gcu</u> U <u>au</u> aug.....            | 1    | 1 | seq |
| .....ggggaugua <u>gc</u> C <u>cau</u> aug.....            | 5    | 1 | seq |
| .....ggggaugua <u>g</u> U <u>cau</u> aug.....             | 4    | 1 | seq |
| .....ggggaG <u>ua</u> gcu <u>cau</u> aug.....             | 1    | 1 | seq |
| .....ggggaugua <u>gc</u> cu <u>au</u> C <u>u</u> g.....   | 78   | 1 | seq |
| .....ggggaugua <u>gc</u> cu <u>au</u> A <u>g</u> .....    | 3    | 1 | seq |
| .....ggggaugua <u>gc</u> cu <u>au</u> A <u>G</u> .....    | 4    | 1 | seq |
| .....ggggaugua <u>gc</u> cu <u>au</u> aug.....            | 1    | 1 | seq |
| .....gAggaugua <u>gc</u> cu <u>au</u> aug.....            | 2    | 1 | seq |
| .....ggggaugua <u>gc</u> cuG <u>u</u> aug.....            | 7    | 1 | seq |
| .....ggggaugua <u>gc</u> cuC <u>u</u> aug.....            | 1    | 1 | seq |
| .....ggggaugua <u>gc</u> cu <u>au</u> A <u>gg</u> .....   | 1    | 1 | seq |
| .....ggggaugua <u>gc</u> cuG <u>u</u> augg.....           | 9    | 1 | seq |
| .....ggggauU <u>a</u> gcu <u>cau</u> augg.....            | 1    | 1 | seq |
| .....ggggaugua <u>gc</u> C <u>cau</u> augg.....           | 14   | 1 | seq |
| .....ggggaugua <u>gc</u> A <u>cau</u> augg.....           | 1    | 1 | seq |
| .....ggggaugua <u>g</u> U <u>cau</u> augg.....            | 5    | 1 | seq |
| .....Ugggaugua <u>gc</u> cu <u>au</u> augg.....           | 6    | 1 | seq |
| .....Ngggaugua <u>gc</u> cu <u>au</u> augg.....           | 4    | 1 | seq |
| .....ggggaugua <u>gc</u> cu <u>au</u> C <u>u</u> gg.....  | 45   | 1 | seq |
| .....ggggaugua <u>gc</u> cu <u>au</u> A <u>G</u> .....    | 176  | 1 | seq |
| .....ggggaugua <u>gc</u> cu <u>au</u> C <u>G</u> .....    | 1    | 1 | seq |
| .....ggggaugC <u>a</u> gcu <u>cau</u> augg.....           | 2    | 1 | seq |
| .....ggggG <u>u</u> gcu <u>cau</u> augg.....              | 10   | 1 | seq |
| .....ggggaG <u>u</u> gcu <u>cau</u> augg.....             | 2    | 1 | seq |
| .....gAggaugua <u>gc</u> cu <u>au</u> augg.....           | 3    | 1 | seq |
| .....ggggaugua <u>gc</u> cu <u>au</u> augg.....           | 2618 | 0 | seq |
| .....ggggaugua <u>gc</u> cu <u>au</u> A <u>G</u> .....    | 6    | 1 | seq |
| .....ggggaugua <u>gc</u> cuC <u>u</u> augg.....           | 1    | 1 | seq |
| .....ggggaugua <u>gc</u> cu <u>au</u> U <u>G</u> .....    | 4    | 1 | seq |
| .....ggggaugua <u>gc</u> cu <u>au</u> augg.....           | 1    | 1 | seq |
| .....gUgggaugua <u>gc</u> cu <u>au</u> augg.....          | 1    | 1 | seq |
| .....ggggaugua <u>gc</u> cu <u>au</u> gC.....             | 15   | 1 | seq |
| .....ggggaugA <u>g</u> cu <u>cau</u> augg.....            | 3    | 1 | seq |
| .....ggggaugua <u>gc</u> cu <u>au</u> G <u>u</u> gg.....  | 7    | 1 | seq |
| .....ggggaugua <u>gc</u> cu <u>au</u> A <u>G</u> .....    | 14   | 1 | seq |
| .....ggggaugG <u>g</u> cu <u>cau</u> augg.....            | 5    | 1 | seq |
| .....ggggaugua <u>gc</u> cuU <u>au</u> augg.....          | 1    | 1 | seq |
| .....ggggaugua <u>gc</u> cuG <u>u</u> augg.....           | 1    | 1 | seq |
| .....ggggaC <u>u</u> gcu <u>cau</u> augg.....             | 8    | 1 | seq |
| .....ggggaugua <u>gc</u> cu <u>au</u> gU.....             | 34   | 1 | seq |
| .....ggggaugU <u>g</u> cu <u>cau</u> augg.....            | 1    | 1 | seq |
| .....ggggauguaC <u>c</u> cu <u>cau</u> augg.....          | 1    | 1 | seq |
| .....ggggauU <u>a</u> gcu <u>cau</u> auggu.....           | 3    | 1 | seq |
| .....ggggaugua <u>gc</u> cu <u>au</u> G <u>u</u> ggu..... | 5    | 1 | seq |
| .....Cgggaugua <u>gc</u> cu <u>au</u> auggu.....          | 1    | 1 | seq |
| .....ggggaugC <u>a</u> gcu <u>cau</u> auggu.....          | 3    | 1 | seq |
| .....ggggaugua <u>gc</u> C <u>cau</u> auggu.....          | 9    | 1 | seq |
| .....ggggaugua <u>gc</u> cu <u>au</u> auggA.....          | 30   | 1 | seq |
| .....ggggaugua <u>gc</u> cu <u>au</u> auggC.....          | 368  | 1 | seq |
| .....Ngggaugua <u>gc</u> cu <u>au</u> auggu.....          | 4    | 1 | seq |
| .....ggggaugua <u>gc</u> cuC <u>u</u> auggu.....          | 1    | 1 | seq |
| .....ggggaugG <u>g</u> cu <u>cau</u> auggu.....           | 6    | 1 | seq |
| .....ggggaugua <u>gc</u> cu <u>au</u> A <u>G</u> gu.....  | 2    | 1 | seq |
| .....ggggaugua <u>gc</u> cu <u>au</u> A <u>G</u> gu.....  | 7    | 1 | seq |
| .....ggggaugua <u>g</u> U <u>cau</u> auggu.....           | 2    | 1 | seq |
| .....ggggaugua <u>gc</u> A <u>cau</u> auggu.....          | 2    | 1 | seq |
| .....ggggG <u>u</u> gcu <u>cau</u> auggu.....             | 9    | 1 | seq |
| .....ggggaugua <u>gc</u> cu <u>au</u> C <u>u</u> ggu..... | 61   | 1 | seq |
| .....gggU <u>a</u> gcu <u>cau</u> auggu.....              | 2    | 1 | seq |
| .....ggggaugua <u>gc</u> cu <u>au</u> auggu.....          | 2    | 1 | seq |
| .....ggggaC <u>u</u> gcu <u>cau</u> auggu.....            | 11   | 1 | seq |
| .....ggggaugua <u>gc</u> cu <u>au</u> auggG.....          | 66   | 1 | seq |
| .....ggggaugua <u>gc</u> cu <u>au</u> gC <u>u</u> .....   | 4    | 1 | seq |
| .....ggggaugua <u>gc</u> G <u>cau</u> auggu.....          | 1    | 1 | seq |
| .....ggggaugU <u>g</u> cu <u>cau</u> auggu.....           | 4    | 1 | seq |
| .....Ugggaugua <u>gc</u> cu <u>au</u> auggu.....          | 5    | 1 | seq |
| .....ggggaugua <u>gc</u> cu <u>au</u> auggu.....          | 2121 | 0 | seq |
| .....ggggaugua <u>gc</u> cuG <u>u</u> auggu.....          | 5    | 1 | seq |
| .....ggggaugA <u>g</u> cu <u>cau</u> auggu.....           | 1    | 1 | seq |

## Mature

## Star

agaagauugaugauuuuuau~~ggggauguagcuc~~auau~~ggguagagugcucgc~~uuaucau~~g~~cgagag~~guau~~gggggaucua~~u~~acccccacavaucccaucau~~caag~~cccaauucuaauuc

|                     |      |   |     |
|---------------------|------|---|-----|
| .....ggCgauguagcuc  | 1    | 1 | seq |
| .....ggggauguagcuc  | 1    | 1 | seq |
| .....gUgggauguagcuc | 2    | 1 | seq |
| .....gggggauguagcuc | 5    | 1 | seq |
| .....gggggauguagcuc | 3    | 1 | seq |
| .....gggggauguagcuc | 2    | 1 | seq |
| .....gggggauguagcuc | 1    | 1 | seq |
| .....gggggauguagcuc | 4    | 1 | seq |
| .....gggggauguagcuc | 4    | 1 | seq |
| .....gggggauguagcuc | 2    | 1 | seq |
| .....gggggauguagcuc | 1    | 1 | seq |
| .....gggggauguagcuc | 1    | 1 | seq |
| .....gggggauguagcuc | 4    | 1 | seq |
| .....gggggauguagcuc | 2    | 1 | seq |
| .....gggggauguagcuc | 1    | 1 | seq |
| .....gggggauguagcuc | 1    | 1 | seq |
| .....gggggauguagcuc | 1    | 1 | seq |
| .....gggggauguagcuc | 3    | 1 | seq |
| .....gggggauguagcuc | 5    | 1 | seq |
| .....gUgggauguagcuc | 2    | 1 | seq |
| .....gggggauguagcuc | 35   | 1 | seq |
| .....gggggauguagcuc | 1    | 1 | seq |
| .....gggggauguagcuc | 2    | 1 | seq |
| .....gggggauguagcuc | 3    | 1 | seq |
| .....gggggauguagcuc | 16   | 1 | seq |
| .....gggggauguagcuc | 2    | 1 | seq |
| .....gggggauguagcuc | 1    | 1 | seq |
| .....gggggauguagcuc | 1    | 1 | seq |
| .....gggggauguagcuc | 10   | 1 | seq |
| .....gggggauguagcuc | 1809 | 0 | seq |
| .....Ngggauguagcuc  | 4    | 1 | seq |
| .....Cgggauguagcuc  | 1    | 1 | seq |
| .....ggggauguagcuc  | 2    | 1 | seq |
| .....gggggauguagcuc | 31   | 1 | seq |
| .....gggggauguagcuc | 1    | 1 | seq |
| .....ggUgauguagcuc  | 1    | 1 | seq |
| .....gggggauguagcuc | 1    | 1 | seq |
| .....gggggauguagcuc | 1    | 1 | seq |
| .....gggggauguagcuc | 1    | 1 | seq |
| .....gggggauguagcuc | 4    | 1 | seq |
| .....Ngggauguagcuc  | 1    | 1 | seq |
| .....gggggauguagcuc | 1    | 1 | seq |
| .....gggggauguagcuc | 2    | 1 | seq |
| .....gggggauguagcuc | 1    | 1 | seq |
| .....gggggauguagcuc | 22   | 1 | seq |
| .....gUgggauguagcuc | 1    | 1 | seq |
| .....gggggauguagcuc | 4    | 1 | seq |
| .....gCggauguagcuc  | 1    | 1 | seq |
| .....gggggauguagcuc | 1    | 1 | seq |
| .....gggggauguagcuc | 444  | 0 | seq |
| .....gggggauguagcuc | 1    | 1 | seq |
| .....gggggauguagcuc | 4    | 1 | seq |
| .....gggggauguagcuc | 1    | 1 | seq |
| .....gAggauguagcuc  | 1    | 1 | seq |
| .....Ugggauguagcuc  | 2    | 1 | seq |
| .....gggggauguagcuc | 3    | 1 | seq |
| .....gggggauguagcuc | 3    | 1 | seq |
| .....gggggauguagcuc | 1    | 1 | seq |
| .....gggggauguagcuc | 1    | 1 | seq |
| .....gggggauguagcuc | 1    | 1 | seq |
| .....gggggauguagcuc | 2    | 1 | seq |
| .....gCggauguagcuc  | 2    | 1 | seq |
| .....gggggauguagcuc | 13   | 1 | seq |
| .....gggggauguagcuc | 1    | 1 | seq |
| .....gggggauguagcuc | 2    | 1 | seq |
| .....gggggauguagcuc | 5    | 1 | seq |
| .....Ngggauguagcuc  | 1    | 1 | seq |
| .....gggggauguagcuc | 3    | 1 | seq |
| .....gggggauguagcuc | 1    | 1 | seq |
| .....gggggauguagcuc | 1    | 1 | seq |
| .....gggggauguagcuc | 2    | 1 | seq |
| .....gggggauguagcuc | 1    | 1 | seq |
| .....gggggauguagcuc | 859  | 0 | seq |

## Mature

## Star

agaagauugaugauuuuuau~~ggggau~~guagcucauaugguagagugcucgcuuaucaugcgcgagag~~guaugggg~~gaucuauacccccacauaucccaucaucaaagcccaauucuaauuc

|             |         |         |                    |              |       |   |     |     |
|-------------|---------|---------|--------------------|--------------|-------|---|-----|-----|
| .....ggggau | guagcuc | aua     | Cgguaga            | .....        | 2     | 1 | seq |     |
| .....ggggau | gAagcuc | aua     | ugguaga            | .....        | 1     | 1 | seq |     |
| .....ggggau | guagcuc | aua     | ugguagC            | .....        | 1     | 1 | seq |     |
| .....ggggau | guagcuc | aua     | ugguagG            | .....        | 28    | 1 | seq |     |
| .....ggggau | Cuagcuc | aua     | ugguaga            | .....        | 1     | 1 | seq |     |
| .....gggU   | auagcuc | aua     | ugguaga            | .....        | 1     | 1 | seq |     |
| .....ggggau | guagcuc | aua     | ugguagU            | .....        | 8     | 1 | seq |     |
| .....ggggau | guagcuc | aua     | ugCuaga            | .....        | 1     | 1 | seq |     |
| .....ggggau | gua     | Cc      | auaugguaga         | .....        | 1     | 1 | seq |     |
| .....ggggau | guagcuc | aua     | Uguaga             | .....        | 1     | 1 | seq |     |
| .....ggggau | guagcuc | au      | Cugguagag          | .....        | 7     | 1 | seq |     |
| .....gCg    | gaug    | uagcuc  | auaugguagag        | .....        | 1     | 1 | seq |     |
| .....ggggau | guag    | Uuc     | auaugguagag        | .....        | 2     | 1 | seq |     |
| .....ggggau | guagc   | Cc      | auaugguagag        | .....        | 1     | 1 | seq |     |
| .....Nggg   | au      | guagcuc | auaugguagag        | .....        | 1     | 1 | seq |     |
| .....ggggau | guagcuc | aua     | ugguagCg           | .....        | 1     | 1 | seq |     |
| .....ggggau | gCagcuc | aua     | ugguagag           | .....        | 1     | 1 | seq |     |
| .....ggggau | guagcuc | aua     | ugguagGg           | .....        | 3     | 1 | seq |     |
| .....ggggau | guagcuc | aua     | ugguagaA           | .....        | 6     | 1 | seq |     |
| .....ggggau | guagcuc | aua     | ugguGgag           | .....        | 1     | 1 | seq |     |
| .....ggggau | guagcuc | aua     | ugguagaC           | .....        | 1     | 1 | seq |     |
| .....ggggau | guagcuc | aua     | Cgguagag           | .....        | 3     | 1 | seq |     |
| .....ggggau | guagcuc | aua     | ugguagaU           | .....        | 1     | 1 | seq |     |
| .....ggggau | guagcuc | Gua     | ugguagag           | .....        | 1     | 1 | seq |     |
| .....Uggg   | au      | guagcuc | auaugguagag        | .....        | 2     | 1 | seq |     |
| .....ggggau | guagcuc | aua     | uggCagag           | .....        | 2     | 1 | seq |     |
| .....ggggau | guagcuc | aua     | uggGagag           | .....        | 1     | 1 | seq |     |
| .....ggggau | guagcuc | aua     | ugguagag           | .....        | 369   | 0 | seq |     |
| .....ggggau | guUgc   | uc      | auaugguagag        | .....        | 1     | 1 | seq |     |
| .....ggggau | guagcuc | aua     | ugguagagu          | .....        | 171   | 0 | seq |     |
| .....gggU   | au      | guagcuc | auaugguagagu       | .....        | 1     | 1 | seq |     |
| .....ggggau | Ua      | guc     | uc                 | auaugguagagu | ..... | 1 | 1   | seq |
| .....ggggau | guagcuc | aua     | ugguagagG          | .....        | 2     | 1 | seq |     |
| .....ggggau | guagcuc | aua     | ugguagGgu          | .....        | 1     | 1 | seq |     |
| .....ggggau | guagcuc | Gua     | ugguagagu          | .....        | 1     | 1 | seq |     |
| .....ggggau | guagcuc | aua     | Agguagagu          | .....        | 1     | 1 | seq |     |
| .....ggggau | guagcuc | aua     | ugguagagA          | .....        | 18    | 1 | seq |     |
| .....ggggau | gua     | Cc      | auaugguagagu       | .....        | 1     | 1 | seq |     |
| .....ggggau | guagcuc | au      | Gugguagagu         | .....        | 1     | 1 | seq |     |
| .....ggggG  | u       | guagcuc | auaugguagagu       | .....        | 1     | 1 | seq |     |
| .....gggg   | a       | Cgu     | agcuc              | auaugguagagu | ..... | 1 | 1   | seq |
| .....ggggau | guagcuc | aua     | ugguagagaCu        | .....        | 1     | 1 | seq |     |
| .....ggggau | guGc    | uc      | auaugguagagu       | .....        | 1     | 1 | seq |     |
| .....ggggau | guagcuc | au      | Cugguagagu         | .....        | 2     | 1 | seq |     |
| .....ggggau | guagcuc | aua     | ugguagagAg         | .....        | 1     | 1 | seq |     |
| .....ggggau | guagcuc | aua     | ugguagaguU         | .....        | 1     | 1 | seq |     |
| .....ggggau | guagcuc | aua     | ugguagagAgc        | .....        | 1     | 1 | seq |     |
| .....ggggau | guagcuc | aua     | ugguagagAgcuc      | .....        | 2     | 1 | seq |     |
| .....ggggau | guagcuc | aua     | ugguagagAgcucgc    | .....        | 4     | 1 | seq |     |
| .....ggggau | guagcuc | aua     | ugguagagAgcucgcu   | .....        | 43    | 1 | seq |     |
| .....ggggau | guagcuc | aua     | ugguagagAgcucgcuu  | .....        | 21    | 1 | seq |     |
| .....ggggau | guagcuc | aua     | ugguagagCgcucgcuua | .....        | 1     | 1 | seq |     |
| .....Agg    | au      | guagcuc | auaug              | .....        | 1     | 1 | seq |     |
| .....ggg    | au      | guagcuc | auCu               | g            | ..... | 4 | 1   | seq |
| .....ggg    | au      | guagcuc | auGug              | .....        | 3     | 1 | seq |     |
| .....ggga   | Cgu     | agcuc   | auaug              | .....        | 2     | 1 | seq |     |
| .....ggg    | au      | guagc   | Cc                 | auaug        | ..... | 1 | 1   | seq |
| .....gggG   | u       | guagcuc | auaug              | .....        | 1     | 1 | seq |     |
| .....ggg    | au      | guagcuc | auaug              | .....        | 101   | 0 | seq |     |
| .....ggg    | au      | guagcuc | auauC              | .....        | 1     | 1 | seq |     |
| .....ggg    | au      | guagc   | Cc                 | auaugg       | ..... | 1 | 1   | seq |
| .....ggg    | au      | guag    | Uuc                | auaugg       | ..... | 1 | 1   | seq |
| .....ggg    | au      | guagcuc | auGugg             | .....        | 1     | 1 | seq |     |
| .....gUg    | au      | guagcuc | auaugg             | .....        | 1     | 1 | seq |     |
| .....Agg    | au      | guagcuc | auaugg             | .....        | 1     | 1 | seq |     |
| .....ggg    | au      | guagcuc | auCu               | g            | ..... | 1 | 1   | seq |
| .....ggg    | au      | guagcuc | auaugA             | .....        | 7     | 1 | seq |     |
| .....ggg    | au      | guagcuc | auaugU             | .....        | 1     | 1 | seq |     |
| .....ggg    | au      | guagcuc | auaugg             | .....        | 147   | 0 | seq |     |

Mature Star

## Star

agaagauugaugauuuuau**ggggauguagcuc**au**ggg**uagagugcucgcuuau**caugcgagag**gua**ugggg**aucuau**acccca**cauau**cccau**caucaag**ccca**auucuaauuc

|                                            |     |   |     |
|--------------------------------------------|-----|---|-----|
| .....Aggauguagcucauaugggu.....             | 1   | 1 | seq |
| .....Nggauguagcucauaugggu.....             | 1   | 1 | seq |
| .....gggauguagcucauaCgggu.....             | 1   | 1 | seq |
| .....gggauguagcucauauggG.....              | 5   | 1 | seq |
| .....Uggauguagcucauaugggu.....             | 1   | 1 | seq |
| .....gggauguagcucauCuggu.....              | 2   | 1 | seq |
| .....gggauguagcucauaugggu.....             | 110 | 0 | seq |
| .....gggauguagcucauauggC.....              | 20  | 1 | seq |
| .....gggaugCagcucuaugggua.....             | 1   | 1 | seq |
| .....ggAauguagcucuaaugggua.....            | 1   | 1 | seq |
| .....gggauguagcucuaauggguC.....            | 1   | 1 | seq |
| .....gggauguagcucuaauggguU.....            | 1   | 1 | seq |
| .....gggauguagcucuaaGggua.....             | 1   | 1 | seq |
| .....gggauguagcucauCuggua.....             | 1   | 1 | seq |
| .....gggauguagcuAaugggua.....              | 1   | 1 | seq |
| .....gggauguagcucuaaugggua.....            | 120 | 0 | seq |
| .....gggaCguagcucuaaugggua.....            | 2   | 1 | seq |
| .....gggauguagcucuaauggguG.....            | 4   | 1 | seq |
| .....gggauguagcucuaauggGCa.....            | 1   | 1 | seq |
| .....gggauguagcucuaauggGCa.....            | 1   | 1 | seq |
| .....gggauguagcuUaugggua.....              | 1   | 1 | seq |
| .....gggauguagcucuaauggguaA.....           | 1   | 1 | seq |
| .....gggaugCagcucuaauggguag.....           | 1   | 1 | seq |
| .....gUgauguagcucuaauggguag.....           | 2   | 1 | seq |
| .....gggauguagcucuaauggguag.....           | 24  | 0 | seq |
| .....gggauguagcucuaauggguGga.....          | 1   | 1 | seq |
| .....gggauguagcucuaauggguagG.....          | 1   | 1 | seq |
| .....gggauguagcucuaUGugguaga.....          | 1   | 1 | seq |
| .....gggauguagcucuaauggGaga.....           | 1   | 1 | seq |
| .....gggauguagcucuaauggguaga.....          | 39  | 0 | seq |
| .....gggauguagcucuaauggguCga.....          | 1   | 1 | seq |
| .....gggauguagcucuaauggguagag.....         | 14  | 0 | seq |
| .....gggauguagcucuaauggguagaA.....         | 1   | 1 | seq |
| .....gggauguagcCcauauggguagag.....         | 1   | 1 | seq |
| .....gggauguagcucGuauggguagag.....         | 1   | 1 | seq |
| .....gggauguagcucauCugguagag.....          | 2   | 1 | seq |
| .....gggauguagcucuaauggguagagu.....        | 15  | 0 | seq |
| .....gggauguagcucuaauggguagagAgcucgcu..... | 1   | 1 | seq |
| .....ggauguagcucuaaugg.....                | 7   | 0 | seq |
| .....ggauguagcucuaaugggu.....              | 2   | 0 | seq |
| .....ggauguagcucuaaugggua.....             | 3   | 0 | seq |
| .....ggauguagcucuaauggguaga.....           | 2   | 0 | seq |
| .....gauguagcucuaauggG.....                | 5   | 1 | seq |
| .....gauguagcucuaaugggu.....               | 71  | 0 | seq |
| .....gauguagcucuaUGuggu.....               | 1   | 1 | seq |
| .....gauguagcucuaaGgggu.....               | 1   | 1 | seq |
| .....gauguagcucuaauggC.....                | 14  | 1 | seq |
| .....gauguagcCcauaugggua.....              | 1   | 1 | seq |
| .....gauguagcucuaaugggua.....              | 123 | 0 | seq |
| .....gauguagcucuaauggguG.....              | 2   | 1 | seq |
| .....gaGguagcucuaaugggua.....              | 1   | 1 | seq |
| .....gauguagcucuaauggCa.....               | 1   | 1 | seq |
| .....Aauguagcucuaaugggua.....              | 1   | 1 | seq |
| .....gauguagcucuaauggguag.....             | 7   | 0 | seq |
| .....gauguagcucuaauggguaU.....             | 1   | 1 | seq |
| .....gauguagUucauauggguaga.....            | 1   | 1 | seq |
| .....gauguagcucuaauggguaga.....            | 26  | 0 | seq |
| .....gauguagcCcauauggguaga.....            | 1   | 1 | seq |
| .....gGuaguagcucuaauggguaga.....           | 1   | 1 | seq |
| .....gauguagcucuaauggguagag.....           | 5   | 0 | seq |
| .....augauaCcauaugggua.....                | 1   | 1 | seq |
| .....aCguagcucuaaugggua.....               | 1   | 1 | seq |
| .....augaagcucuaauggGCa.....               | 1   | 1 | seq |
| .....augaagcucuaaugggua.....               | 45  | 0 | seq |
| .....augaagcucuaauggCa.....                | 1   | 1 | seq |
| .....augaagcucauCugguua.....               | 2   | 1 | seq |
| .....augaagcucuaauggguag.....              | 9   | 0 | seq |
| .....augaagcucuaauggguaga.....             | 42  | 0 | seq |
| .....augaagcucuaauggguagG.....             | 1   | 1 | seq |
| .....augaagcucuaauggguagag.....            | 3   | 0 | seq |

## Mature

## Star

agaagauugaugauuuuuauaggggauguaagcucuaauugguagagugcucgcucuaucaugcgcagagguaugggggaucauauaccccccacauaucccaucaucaagcccaauucuaauuc

|                                   |     |   |     |
|-----------------------------------|-----|---|-----|
| ..... uguagcucuaauugguag.....     | 5   | 0 | seq |
| ..... uguagcucuaauugguag.....     | 1   | 1 | seq |
| ..... uguagcucuaauugguagC.....    | 1   | 1 | seq |
| ..... uguagcCcauauugguaga.....    | 1   | 1 | seq |
| ..... uguagcucuaauugguaga.....    | 1   | 1 | seq |
| ..... uguagcucuaauugguaga.....    | 45  | 0 | seq |
| ..... uguagcucuaauugguUga.....    | 1   | 1 | seq |
| ..... uguagcucuaauugguagagu.....  | 1   | 0 | seq |
| ..... guagcucuaauugguaga.....     | 11  | 0 | seq |
| ..... guagcucuaauugguagU.....     | 1   | 1 | seq |
| ..... guagcucuaauugguaga.....     | 1   | 1 | seq |
| ..... guagcucuaauugguagag.....    | 1   | 0 | seq |
| ..... guagcucuaauugguagagG.....   | 1   | 1 | seq |
| ..... Aagcucuaauugguagag.....     | 1   | 1 | seq |
| ..... cauaugguagagAgcucgcu.....   | 1   | 1 | seq |
| ..... ugguaagaguUcucgcu.....      | 1   | 1 | seq |
| ..... ugguaagagCgcucgcuau.....    | 1   | 1 | seq |
| ..... cUugcgagagguaugggga.....    | 1   | 1 | seq |
| ..... cUugcgagagguaugggga.....    | 1   | 1 | seq |
| ..... cGugcgagagguauggggauc.....  | 1   | 1 | seq |
| ..... cUugcgagagguauggggauc.....  | 3   | 1 | seq |
| ..... caugcgagagguaugggAgauc..... | 1   | 1 | seq |
| ..... Uugcgagagguauggggauc.....   | 3   | 1 | seq |
| ..... Cugcgagagguauggggauc.....   | 1   | 1 | seq |
| ..... ugcgGgagguaugggga.....      | 1   | 1 | seq |
| ..... ugcgagagguaugggga.....      | 59  | 0 | seq |
| ..... ugcgagagguaugggga.....      | 1   | 1 | seq |
| ..... ugcgagagguaugggga.....      | 1   | 1 | seq |
| ..... ugcgagagguaugggga.....      | 2   | 1 | seq |
| ..... ugcgagagguaugAgga.....      | 1   | 1 | seq |
| ..... ugcgagagguaugggCa.....      | 1   | 1 | seq |
| ..... ugcgagagguauggggauc.....    | 2   | 0 | seq |
| ..... ugcgagagguauggggauc.....    | 1   | 1 | seq |
| ..... ugcgGgagguauggggauc.....    | 1   | 1 | seq |
| ..... ugcgagagguaugAggauc.....    | 1   | 1 | seq |
| ..... ugcgagagguauggggauc.....    | 2   | 1 | seq |
| ..... ugcgagagguauggggauc.....    | 194 | 0 | seq |
| ..... ugcgagagguauggggauc.....    | 4   | 1 | seq |
| ..... ugcgagagguauggggauc.....    | 1   | 1 | seq |
| ..... ugcgagagguauggggauc.....    | 1   | 1 | seq |
| ..... ugcgagagguauggggauc.....    | 1   | 1 | seq |
| ..... ugcgGgagguauggggauc.....    | 10  | 1 | seq |
| ..... ugcgGgagguauggggauc.....    | 1   | 1 | seq |
| ..... Ngcgagagguauggggauc.....    | 1   | 1 | seq |
| ..... ugcgagagguauggggauc.....    | 2   | 1 | seq |
| ..... ugcgagagguauggggauc.....    | 1   | 1 | seq |
| ..... ugcgagagguauggggauc.....    | 103 | 1 | seq |
| ..... ugcgagagguauggggauc.....    | 10  | 1 | seq |
| ..... ugcgagagguauggggauc.....    | 3   | 1 | seq |
| ..... ugcgagagguauggggauc.....    | 2   | 0 | seq |
| ..... gcgagagguauggggauc.....     | 1   | 1 | seq |
| ..... gcgagagguauggggauc.....     | 5   | 0 | seq |
| ..... gcgagagguauggggauc.....     | 114 | 0 | seq |
| ..... gcgagagguauggggauc.....     | 3   | 1 | seq |
| ..... gcgagagguauggggauc.....     | 2   | 1 | seq |
| ..... Ncgagagguauggggauc.....     | 1   | 1 | seq |
| ..... gcgagagguauggggauc.....     | 2   | 1 | seq |
| ..... gcgagagguauggggauc.....     | 2   | 1 | seq |
| ..... gcgagagguauggggauc.....     | 26  | 1 | seq |
| ..... cgagagguauggggauc.....      | 2   | 0 | seq |
| ..... cgagagguauggggauc.....      | 1   | 1 | seq |
| ..... gagagguauggggauc.....       | 6   | 1 | seq |

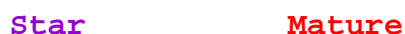

|    |                                                                                                                              |       |     |        |
|----|------------------------------------------------------------------------------------------------------------------------------|-------|-----|--------|
| 5' | uagaucccaucaaacaucuccauaguuagugugaacuuugugguagag <u>uaguacuaggaugggu</u> gacauccugagaaguccuaguguugcaccuuuccccccuuuuuacaugggu | -3'   | obs |        |
|    | uagaucccaucaaacaucuccauaguuagugugaacuuugugguagag <u>uaguacuaggaugggu</u> gacauccugagaaguccuaguguugcaccuuuccccccuuuuuacaugggu |       | exp |        |
|    | .....((((.....((((((((((.....)))..)))))).).((((((((((((((((.....))).....)))))))))))))).....))))).)                           | reads | mm  | sample |
|    | .....cuugugCuagaguaguacu.....                                                                                                | 2     | 1   | seq    |
|    | .....uugugCuagaguaguac.....                                                                                                  | 1     | 1   | seq    |
|    | .....uugugCuagaguaguacu.....                                                                                                 | 1     | 1   | seq    |
|    | .....uagaguaguacuagggau.....                                                                                                 | 1     | 0   | seq    |
|    | .....uagaguaguacuagggau.....                                                                                                 | 1     | 0   | seq    |
|    | .....uagaguaguacuagggau.....                                                                                                 | 1     | 0   | seq    |
|    | .....uagaguaguacuagggau.....                                                                                                 | 1     | 0   | seq    |
|    | .....uagaguaguacuagggau.....                                                                                                 | 1     | 0   | seq    |
|    | .....uagGguaguacuagggau.....                                                                                                 | 1     | 1   | seq    |
|    | .....uagaguaguacuagggau.....                                                                                                 | 2     | 0   | seq    |
|    | .....agaguaguacuagggau.....                                                                                                  | 2     | 0   | seq    |
|    | .....agaguaguacuagggau.....                                                                                                  | 3     | 0   | seq    |
|    | .....agaguaguacuagggau.....                                                                                                  | 1     | 0   | seq    |
|    | .....gaguaguacuagggau.....                                                                                                   | 1     | 0   | seq    |
|    | .....gaguaguacuagggau.....                                                                                                   | 4     | 0   | seq    |
|    | .....gaguaguacuagggau.....                                                                                                   | 5     | 0   | seq    |
|    | .....gaguaguacuagggau.....                                                                                                   | 2     | 0   | seq    |
|    | .....aguaguacuagggau.....                                                                                                    | 2     | 0   | seq    |
|    | .....aguaguacuagggau.....                                                                                                    | 4     | 0   | seq    |
|    | .....aguaguacuagggau.....                                                                                                    | 3     | 0   | seq    |
|    | .....aguaguacuagggau.....                                                                                                    | 1     | 0   | seq    |
|    | .....guaguacuagggau.....                                                                                                     | 7     | 0   | seq    |
|    | .....guaguacuagggau.....                                                                                                     | 1     | 1   | seq    |
|    | .....guaguacuagggau.....                                                                                                     | 1     | 1   | seq    |
|    | .....guaguacuagggau.....                                                                                                     | 1     | 0   | seq    |
|    | .....uaguacuagggau.....                                                                                                      | 8     | 0   | seq    |
|    | .....uaguacuagggau.....                                                                                                      | 1     | 0   | seq    |
|    | .....Ggaaguccuaguguugcaccuucc.....                                                                                           | 1     | 1   | seq    |
|    | .....gaaguccuaguguugca.....                                                                                                  | 5     | 0   | seq    |
|    | .....gaaguccuaguguugcac.....                                                                                                 | 1     | 0   | seq    |
|    | .....gaaguccuaguguugcacc.....                                                                                                | 9     | 0   | seq    |
|    | .....gaaguccuaguguugcaccu.....                                                                                               | 8     | 0   | seq    |

## Star

## Mature

|                                                                                                                           |    |   |     |
|---------------------------------------------------------------------------------------------------------------------------|----|---|-----|
| uagaucccaucaaacuccauaguuagugaaacuugugguagag <u>uaguacuagggugacauccugagaaguccuagugu</u> <u>gacccu</u> uuccccccuuuuuacauggu |    |   |     |
| .....gaaguccuaguguugcaccuC.....                                                                                           | 1  | 1 | seq |
| .....gaaguccuaguguugcaccuuc.....                                                                                          | 2  | 0 | seq |
| .....aaguccuaguguugcac.....                                                                                               | 1  | 0 | seq |
| .....aaguccuaguguugcacc.....                                                                                              | 15 | 0 | seq |
| .....aaguccuaguguugcaccu.....                                                                                             | 5  | 0 | seq |
| .....aaguccuaguguugcaccuu.....                                                                                            | 1  | 0 | seq |
| .....aaguccuaguguugcaccuCC.....                                                                                           | 1  | 1 | seq |
| .....aaguccuaguguugcaccuucc.....                                                                                          | 4  | 0 | seq |
| .....aguccuaguguugcacc.....                                                                                               | 67 | 0 | seq |
| .....aguccuagugCugcaccu.....                                                                                              | 2  | 1 | seq |
| .....aguccuaguguugcaccu.....                                                                                              | 32 | 0 | seq |
| .....aguccuaguguugcaccuC.....                                                                                             | 1  | 1 | seq |
| .....aguccuaguguugcaccuu.....                                                                                             | 1  | 0 | seq |
| .....aguccuaguguugcaccuucc.....                                                                                           | 2  | 0 | seq |
| .....aguccuaguguugcaccuGcc.....                                                                                           | 1  | 1 | seq |
| .....guccuaguguuuUcaccu.....                                                                                              | 1  | 1 | seq |
| .....guccuaguguugcaccu.....                                                                                               | 20 | 0 | seq |
| .....guccuagCguugcaccu.....                                                                                               | 1  | 1 | seq |
| .....guccuaguguugcaccuu.....                                                                                              | 1  | 0 | seq |
| .....guccuaguguugcaccuC.....                                                                                              | 1  | 1 | seq |
| .....guccuaguguugcGccuuc.....                                                                                             | 1  | 1 | seq |
| .....guUcuaguguugcaccuuc.....                                                                                             | 1  | 1 | seq |
| .....guccuaguguugcaccuuc.....                                                                                             | 2  | 0 | seq |
| .....guccuaguguugcaccuucc.....                                                                                            | 4  | 0 | seq |
| .....uccuaguguugcaccuu.....                                                                                               | 2  | 0 | seq |
| .....uccuaguguugcaccuC.....                                                                                               | 2  | 1 | seq |
| .....uccuaguguugcaccuuc.....                                                                                              | 4  | 0 | seq |
| .....uccuaguguugcaccuCC.....                                                                                              | 2  | 1 | seq |
| .....uccuaguguugcaccuucc.....                                                                                             | 5  | 0 | seq |
| .....uccuaguguugcaccuGcc.....                                                                                             | 1  | 1 | seq |
| .....ccuaguguugcaccuuc.....                                                                                               | 1  | 0 | seq |
| .....ccuaguguugcaccuCC.....                                                                                               | 5  | 1 | seq |
| .....ccuaguguugcGccuuc.....                                                                                               | 1  | 1 | seq |
| .....ccuaguguugcaccuucA.....                                                                                              | 1  | 1 | seq |
| .....ccuaguguugcaccuCCc.....                                                                                              | 1  | 1 | seq |
| .....ccuaguguugcaccuGcc.....                                                                                              | 2  | 1 | seq |
| .....ccuaguguugcaccuucc.....                                                                                              | 16 | 0 | seq |
| .....ccuaAguugcaccuucc.....                                                                                               | 1  | 1 | seq |
| .....cuaguguugcaccuucc.....                                                                                               | 20 | 0 | seq |
| .....cuaguguugcaccuGcc.....                                                                                               | 2  | 1 | seq |

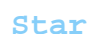

| 5'- | aguguaau | gguaucua   | uggguga       | aguggu     | uaacacac      | ucuggac       | uuuga         | aaucac        | gagugac       | cugggu        | ucga          | aucggga       | aggacc        | uuuuuc        | auuacuuuu     | accgacca      | caauccu       | -3'   | exp |        |
|-----|----------|------------|---------------|------------|---------------|---------------|---------------|---------------|---------------|---------------|---------------|---------------|---------------|---------------|---------------|---------------|---------------|-------|-----|--------|
|     | .....    | (((((..... | ((((((((..... | (((((..... | ((((((((..... | ((((((((..... | ((((((((..... | ((((((((..... | ((((((((..... | ((((((((..... | ((((((((..... | ((((((((..... | ((((((((..... | ((((((((..... | ((((((((..... | ((((((((..... | ((((((((..... | reads | mm  | sample |
|     | .....    | gguaucua   | uggguga       | gugug      | .....         | .....         | .....         | .....         | .....         | .....         | .....         | .....         | .....         | .....         | .....         | .....         | .....         | 1     | 1   | seq    |
|     | .....    | gguaucua   | uggguga       | guA        | .....         | .....         | .....         | .....         | .....         | .....         | .....         | .....         | .....         | .....         | .....         | .....         | .....         | 2     | 1   | seq    |
|     | .....    | gguaucua   | uggguga       | guagug     | .....         | .....         | .....         | .....         | .....         | .....         | .....         | .....         | .....         | .....         | .....         | .....         | .....         | 50    | 0   | seq    |
|     | .....    | Nguaucua   | uggguga       | guagug     | .....         | .....         | .....         | .....         | .....         | .....         | .....         | .....         | .....         | .....         | .....         | .....         | .....         | 1     | 1   | seq    |
|     | .....    | gguaucua   | uggguga       | guagUC     | .....         | .....         | .....         | .....         | .....         | .....         | .....         | .....         | .....         | .....         | .....         | .....         | .....         | 1     | 1   | seq    |
|     | .....    | gguaucua   | uggguga       | guagCgg    | .....         | .....         | .....         | .....         | .....         | .....         | .....         | .....         | .....         | .....         | .....         | .....         | .....         | 6     | 1   | seq    |
|     | .....    | gguaucua   | uggguga       | guagAgg    | .....         | .....         | .....         | .....         | .....         | .....         | .....         | .....         | .....         | .....         | .....         | .....         | .....         | 2     | 1   | seq    |
|     | .....    | gguaucua   | uggguga       | guAugg     | .....         | .....         | .....         | .....         | .....         | .....         | .....         | .....         | .....         | .....         | .....         | .....         | .....         | 1     | 1   | seq    |
|     | .....    | gguaucua   | uggguga       | guagugC    | .....         | .....         | .....         | .....         | .....         | .....         | .....         | .....         | .....         | .....         | .....         | .....         | .....         | 4     | 1   | seq    |
|     | .....    | ggGuaucua  | uggguga       | guagugg    | .....         | .....         | .....         | .....         | .....         | .....         | .....         | .....         | .....         | .....         | .....         | .....         | .....         | 1     | 1   | seq    |
|     | .....    | gguaucua   | uggguga       | guagugU    | .....         | .....         | .....         | .....         | .....         | .....         | .....         | .....         | .....         | .....         | .....         | .....         | .....         | 9     | 1   | seq    |
|     | .....    | gguaucua   | uggguga       | guGgugg    | .....         | .....         | .....         | .....         | .....         | .....         | .....         | .....         | .....         | .....         | .....         | .....         | .....         | 2     | 1   | seq    |
|     | .....    | gguaucua   | auUguga       | guagugg    | .....         | .....         | .....         | .....         | .....         | .....         | .....         | .....         | .....         | .....         | .....         | .....         | .....         | 1     | 1   | seq    |
|     | .....    | gguaucua   | uggguga       | gGg        | .....         | .....         | .....         | .....         | .....         | .....         | .....         | .....         | .....         | .....         | .....         | .....         | .....         | 1     | 1   | seq    |
|     | .....    | gguuAua    | uggguga       | guagugg    | .....         | .....         | .....         | .....         | .....         | .....         | .....         | .....         | .....         | .....         | .....         | .....         | .....         | 1     | 1   | seq    |
|     | .....    | gguaucua   | uggCGua       | guagugg    | .....         | .....         | .....         | .....         | .....         | .....         | .....         | .....         | .....         | .....         | .....         | .....         | .....         | 6     | 1   | seq    |
|     | .....    | gUuaucua   | uggguga       | guagugg    | .....         | .....         | .....         | .....         | .....         | .....         | .....         | .....         | .....         | .....         | .....         | .....         | .....         | 1     | 1   | seq    |
|     | .....    | gguCua     | uggguga       | guagugg    | .....         | .....         | .....         | .....         | .....         | .....         | .....         | .....         | .....         | .....         | .....         | .....         | .....         | 2     | 1   | seq    |
|     | .....    | gguaucua   | uggAGua       | guagugg    | .....         | .....         | .....         | .....         | .....         | .....         | .....         | .....         | .....         | .....         | .....         | .....         | .....         | 2     | 1   | seq    |
|     | .....    | gguaucua   | uggguga       | guA        | g             | .....         | .....         | .....         | .....         | .....         | .....         | .....         | .....         | .....         | .....         | .....         | .....         | 5     | 1   | seq    |
|     | .....    | Nguaucua   | uggguga       | guagugg    | .....         | .....         | .....         | .....         | .....         | .....         | .....         | .....         | .....         | .....         | .....         | .....         | .....         | 1     | 1   | seq    |
|     | .....    | gguaucua   | uggguga       | guagugg    | .....         | .....         | .....         | .....         | .....         | .....         | .....         | .....         | .....         | .....         | .....         | .....         | .....         | 758   | 0   | seq    |
|     | .....    | gguaucua   | Guggguga      | guagugg    | .....         | .....         | .....         | .....         | .....         | .....         | .....         | .....         | .....         | .....         | .....         | .....         | .....         | 2     | 1   | seq    |
|     | .....    | gguaucua   | uggguga       | guaguggu   | .....         | .....         | .....         | .....         | .....         | .....         | .....         | .....         | .....         | .....         | .....         | .....         | .....         | 114   | 0   | seq    |
|     | .....    | gguaucua   | uggguga       | guaguggC   | .....         | .....         | .....         | .....         | .....         | .....         | .....         | .....         | .....         | .....         | .....         | .....         | .....         | 24    | 1   | seq    |
|     | .....    | gguaucua   | ugggug        | Caguggu    | .....         | .....         | .....         | .....         | .....         | .....         | .....         | .....         | .....         | .....         | .....         | .....         | .....         | 1     | 1   | seq    |
|     | .....    | gguaucua   | uggguga       | guAuggu    | .....         | .....         | .....         | .....         | .....         | .....         | .....         | .....         | .....         | .....         | .....         | .....         | .....         | 1     | 1   | seq    |
|     | .....    | gguaucua   | uggguga       | guaguggA   | .....</       |               |               |               |               |               |               |               |               |               |               |               |               |       |     |        |



## Mature

## Star

|                                                                                      |     |   |     |
|--------------------------------------------------------------------------------------|-----|---|-----|
| ggguucuauggguagguagguagguuuaacacucuggcaguuugaauccagugaccugggguucgaaaucccgagaccuuuuuc | 1   | 1 | seq |
| ggguucuauggguAuaugugguu                                                              | 143 | 0 | seq |
| ggguucuauggguaguagugguu                                                              | 29  | 0 | seq |
| ggguucuauggguaguagugguua                                                             | 1   | 1 | seq |
| ggguucuauggguaguagugggCua                                                            | 1   | 1 | seq |
| ggguucuaugggGguagugguua                                                              | 1   | 1 | seq |
| ggguucuauggguaguagugguuaa                                                            | 3   | 0 | seq |
| ggguucuauggguaguagugguuaaca                                                          | 2   | 0 | seq |
| ggguucuauggguaguagugguuaaacacuc                                                      | 2   | 0 | seq |
| ggguucuauggguaguagugguuaCcacuc                                                       | 1   | 1 | seq |
| ggguucuauggguaguagugguuaaacacucuc                                                    | 8   | 0 | seq |
| ggguucuauggguaguagugguuaUcacucuc                                                     | 2   | 1 | seq |
| ggguucuauggguaguagugguuaaacacucA                                                     | 1   | 1 | seq |
| ggguucuauggguaguagugguuaCcacucug                                                     | 2   | 1 | seq |
| ggguucuauggguaguagugguuaaacacucua                                                    | 2   | 1 | seq |
| ggguucuauggguaguagugguuaUcacucug                                                     | 6   | 1 | seq |
| ggguucuauggguaguagugguuaaacacucug                                                    | 7   | 0 | seq |
| ggguucuauggguaguagugguuaUcacucugg                                                    | 2   | 1 | seq |
| ggguucuauggguaguagugguuaaacacucugA                                                   | 2   | 1 | seq |
| ggguucuauggguaguagugguuaaacacucugg                                                   | 17  | 0 | seq |
| ggguucuauggguaguagugguuaaacacucugC                                                   | 1   | 1 | seq |
| ggguucuauggguaguagugguuaaacacucugga                                                  | 2   | 0 | seq |
| ggguucuauggguaguagugguuaaacacucuggacu                                                | 3   | 0 | seq |
| ggguucuauggguaguagugguuaUcacucuggacu                                                 | 1   | 1 | seq |
| ggguucuauggguaguagugguuaCcacucuggacu                                                 | 1   | 1 | seq |
| ggguucuauggguaguagugguuaGcacucuggacuuaugaaucag                                       | 2   | 1 | seq |
| guucuauggguaguagugU                                                                  | 5   | 1 | seq |
| guucuauggguaguagAgg                                                                  | 1   | 1 | seq |
| guucuauggguGuugg                                                                     | 2   | 1 | seq |
| guucGuugguaguaggg                                                                    | 1   | 1 | seq |
| guucuaAgguaguaggg                                                                    | 2   | 1 | seq |
| guCuauggguaguaggg                                                                    | 2   | 1 | seq |
| guucuauggguaguagCg                                                                   | 1   | 1 | seq |
| guucuauggguaguagC                                                                    | 8   | 1 | seq |
| guucuauggguaguagGgg                                                                  | 2   | 1 | seq |
| guucuauggguaguaggg                                                                   | 552 | 0 | seq |
| guucCaugguaguaggg                                                                    | 1   | 1 | seq |
| Nuucuauggguaguaggg                                                                   | 1   | 1 | seq |
| guucuauggguaguagCgg                                                                  | 3   | 1 | seq |
| guucuauggguaguagAg                                                                   | 2   | 1 | seq |
| guucuauggguaguagggG                                                                  | 2   | 1 | seq |
| guucuauggguaguagggC                                                                  | 11  | 1 | seq |
| guucGuugguaguaggg                                                                    | 1   | 1 | seq |
| guucuauggguaguaggg                                                                   | 51  | 0 | seq |
| guucuauggguaguagggA                                                                  | 2   | 1 | seq |
| guucuauggguaguagggG                                                                  | 3   | 1 | seq |
| guucuauggguaguaggguu                                                                 | 54  | 0 | seq |
| guucuaCggguaguaggguu                                                                 | 1   | 1 | seq |
| guucuauggguaguagggua                                                                 | 3   | 1 | seq |
| guucuauggguaguagggGu                                                                 | 1   | 1 | seq |
| guucuauggguaguagggCu                                                                 | 2   | 1 | seq |
| guucuauggguaguaggguC                                                                 | 6   | 1 | seq |
| guucuauggguaguaggguuu                                                                | 9   | 0 | seq |
| guucuauggguaguaggguuG                                                                | 1   | 1 | seq |
| guucuauggguaguaggguuua                                                               | 1   | 0 | seq |
| guucuauggguaguaggguuuCa                                                              | 1   | 1 | seq |
| guucuauggguaguaggguuuaacacu                                                          | 1   | 0 | seq |
| guucuauggguaguaggguuuaNcacuc                                                         | 1   | 1 | seq |
| guucuauggguaguaggguuuaaacacuc                                                        | 1   | 0 | seq |
| guucuauggguaguaggguuuaaacacucuc                                                      | 2   | 0 | seq |
| guucuauggguaguaggguuuaaacacucug                                                      | 3   | 0 | seq |
| guucuauggguaguaggguuuaUcacucug                                                       | 2   | 1 | seq |
| guucuauggguaguaggguuuaaacacucugg                                                     | 2   | 0 | seq |
| guucuauggguaguaggguuuaUcacucugga                                                     | 1   | 1 | seq |
| guuUuauggguaguaggguuuaaacacucuggacu                                                  | 1   | 1 | seq |
| guucuauggguaguaggguuuaaacacucuggacC                                                  | 1   | 1 | seq |
| uuucuauggguaguaggg                                                                   | 13  | 0 | seq |
| uuucuauggguaguagggC                                                                  | 1   | 1 | seq |
| uuucuaCggguaguaggg                                                                   | 1   | 1 | seq |
| uuucuauggguaguaggguC                                                                 | 7   | 1 | seq |

## Mature

## Star

|                                                                                                                   |         |   |     |  |
|-------------------------------------------------------------------------------------------------------------------|---------|---|-----|--|
| aguguaauugguucuauggguguaugggguuaaacacucuggacuuugaauccagugaccucggguucgaaucccggaaggaccuuuuuucuuuacuuuuuacccgaccacaa | caauccu |   |     |  |
| . . . . . uucuauggguguauggguu . . . . .                                                                           | 26      | 0 | seq |  |
| . . . . . uucuauggguguauggguaA . . . . .                                                                          | 1       | 1 | seq |  |
| . . . . . uucuauggguguauggguu . . . . .                                                                           | 11      | 0 | seq |  |
| . . . . . uucuauggguguauggguuAACacucuggacC . . . . .                                                              | 1       | 1 | seq |  |
| . . . . . ucuauggguguauggguC . . . . .                                                                            | 8       | 1 | seq |  |
| . . . . . ucuauggguguauggguu . . . . .                                                                            | 44      | 0 | seq |  |
| . . . . . Acuauggguguauggguu . . . . .                                                                            | 1       | 1 | seq |  |
| . . . . . ucuauggguguauggguu . . . . .                                                                            | 12      | 0 | seq |  |
| . . . . . ucuauggguguauggguuAfcacucug . . . . .                                                                   | 1       | 1 | seq |  |
| . . . . . ucuauggguguauggguuAfcacucuggacu . . . . .                                                               | 1       | 1 | seq |  |
| . . . . . cuauuggguguauggguu . . . . .                                                                            | 16      | 0 | seq |  |
| . . . . . cuauuggguguauggguuAACacucug . . . . .                                                                   | 2       | 0 | seq |  |
| . . . . . cuauuggguguauggguuAfcacucugga . . . . .                                                                 | 1       | 1 | seq |  |
| . . . . . cuauuggguguauggguuAfcacucuggacu . . . . .                                                               | 1       | 1 | seq |  |
| . . . . . cuauuggguguauggguuAACacucuggacu . . . . .                                                               | 2       | 0 | seq |  |
| . . . . . cuauuggguguauggguuAfcacucuggacuucgaaucagugaccugg . . . . .                                              | 1       | 1 | seq |  |
| . . . . . uauggguguauggguu . . . . .                                                                              | 1       | 0 | seq |  |
| . . . . . uauggguguauggguuAfcacucug . . . . .                                                                     | 1       | 1 | seq |  |
| . . . . . uauggguguauggguuAACacucugga . . . . .                                                                   | 1       | 0 | seq |  |
| . . . . . uauggguguauggguuAfcacucuggacu . . . . .                                                                 | 4       | 1 | seq |  |
| . . . . . uauggguguauggguuAfcacucuggacu . . . . .                                                                 | 1       | 1 | seq |  |
| . . . . . uauggguguauggguuAACacucuggacu . . . . .                                                                 | 1       | 0 | seq |  |
| . . . . . auggguguauggguuAfcacucug . . . . .                                                                      | 2       | 1 | seq |  |
| . . . . . CugguguauggguuAACacucuggacu . . . . .                                                                   | 1       | 1 | seq |  |
| . . . . . auggguguauggguuAfcacucuggacu . . . . .                                                                  | 1       | 1 | seq |  |
| . . . . . auggguguauggguuAfcacucuggacu . . . . .                                                                  | 1       | 1 | seq |  |
| . . . . . ugguguauggguuAACacucug . . . . .                                                                        | 1       | 0 | seq |  |
| . . . . . ugguguauggguuAACacucuggacu . . . . .                                                                    | 1       | 0 | seq |  |
| . . . . . ugguguauggguuAACacucuggacuucgaaucagCgaccugg . . . . .                                                   | 1       | 1 | seq |  |
| . . . . . gguguauggguuAACacucug . . . . .                                                                         | 1       | 0 | seq |  |
| . . . . . gguguauggguuAACacucuggacu . . . . .                                                                     | 2       | 0 | seq |  |
| . . . . . gguguauggguuAACacucuggacu . . . . .                                                                     | 1       | 1 | seq |  |
| . . . . . guguaguggguuAACacucug . . . . .                                                                         | 2       | 0 | seq |  |
| . . . . . guguaguggguuAACacucugga . . . . .                                                                       | 3       | 0 | seq |  |
| . . . . . guguaguggguuAACacucuggacu . . . . .                                                                     | 2       | 0 | seq |  |
| . . . . . guguaguggguuAfcacucuggacuucgaaucagugaccuggguuc . . . . .                                                | 2       | 1 | seq |  |
| . . . . . uguaguggguuAACacucug . . . . .                                                                          | 2       | 0 | seq |  |
| . . . . . uguaguggguuAACacucuggacu . . . . .                                                                      | 1       | 0 | seq |  |
| . . . . . uguaguggguuAfcacucuggacu . . . . .                                                                      | 2       | 1 | seq |  |
| . . . . . uguaguggguuAACacucuggacuucga . . . . .                                                                  | 1       | 0 | seq |  |
| . . . . . uguaguggguuAfcacucuggacuucgaaucagugaccugg . . . . .                                                     | 2       | 1 | seq |  |
| . . . . . uguaguggguuAfcacucuggacuucgaaucagugaccuggguucg . . . . .                                                | 1       | 1 | seq |  |
| . . . . . guaguggguuAfcacucug . . . . .                                                                           | 1       | 1 | seq |  |
| . . . . . guaguggguuAACacucug . . . . .                                                                           | 1       | 0 | seq |  |
| . . . . . guaguggguuAACacucugga . . . . .                                                                         | 1       | 0 | seq |  |
| . . . . . guaguggguuAACacucuggacu . . . . .                                                                       | 1       | 0 | seq |  |
| . . . . . guaguggguuAfcacucuggacu . . . . .                                                                       | 2       | 1 | seq |  |
| . . . . . guaguggguuAfcacucuggacu . . . . .                                                                       | 1       | 1 | seq |  |
| . . . . . guaguggguuAfcacucuggacuucgaaucagug . . . . .                                                            | 1       | 1 | seq |  |
| . . . . . guaguggguuAACacucuggacuucgaaucagCgaccuggguucg . . . . .                                                 | 1       | 1 | seq |  |
| . . . . . guaguggguuAACacucuggacuucgaaucagugaccuggguucg . . . . .                                                 | 1       | 1 | seq |  |
| . . . . . uauggguuAACacucug . . . . .                                                                             | 1       | 0 | seq |  |
| . . . . . uauggguuAACacucCg . . . . .                                                                             | 1       | 1 | seq |  |
| . . . . . uauggguuAfcacucuggacu . . . . .                                                                         | 1       | 1 | seq |  |
| . . . . . uauggguuAACacucuggacu . . . . .                                                                         | 4       | 0 | seq |  |
| . . . . . uauggguuAfcacucuggacuucgaauccagu . . . . .                                                              | 1       | 1 | seq |  |
| . . . . . uauggguuAfcacucuggacuucgaauccagugaccugggu . . . . .                                                     | 1       | 1 | seq |  |
| . . . . . uauggguuAfcacucuggacuucgaauccagugaccuggguuc . . . . .                                                   | 1       | 1 | seq |  |
| . . . . . aguggguuAfcacucuggacuucgaauccagu . . . . .                                                              | 1       | 1 | seq |  |
| . . . . . aguggguuAfcacucuggacuucgaauccagugaccuggguuc . . . . .                                                   | 1       | 1 | seq |  |
| . . . . . gugguuAACacucugga . . . . .                                                                             | 1       | 0 | seq |  |
| . . . . . gugguuAACacucuggacu . . . . .                                                                           | 4       | 0 | seq |  |
| . . . . . gugguuAfcacucuggacuucg . . . . .                                                                        | 1       | 1 | seq |  |
| . . . . . gugguuAfcacucuggacuucgaauccagu . . . . .                                                                | 1       | 1 | seq |  |
| . . . . . gugguuAfcacucuggacuucgaauccagugaccugggu . . . . .                                                       | 1       | 1 | seq |  |
| . . . . . gugguuAfcacucuggacuucgaauccagugaccuggguuc . . . . .                                                     | 3       | 1 | seq |  |
| . . . . . gugguuAfcacucuggacuucgaauccagugaccuggguucg . . . . .                                                    | 3       | 1 | seq |  |

## Mature

Star

|                                                                                                                           |     |   |     |
|---------------------------------------------------------------------------------------------------------------------------|-----|---|-----|
| aguguaauugguuuuagugguagugugguuuaacaacucugagucuuugaauccagugaccuggguuucggaaucccggaaggacuuuuuuaauuacuuuuacccgaccacaaacauuccu |     |   |     |
| .....ugguuuaacacucucuggacu.....                                                                                           | 3   | 0 | seq |
| .....ugguuuaUcacucucuggacu.....                                                                                           | 1   | 1 | seq |
| .....ugguuuaCcacucucuggacu.....                                                                                           | 2   | 1 | seq |
| .....ugguuuaacacacucuggacuu.....                                                                                          | 1   | 0 | seq |
| .....ugguuuaGcacucugggacuuiuugaauccaguu.....                                                                              | 7   | 1 | seq |
| .....ugguuuaGcacucugggacuuiuugaauccagugaccug.....                                                                         | 2   | 1 | seq |
| .....ugguuuaGcacucugggacuuiuugaauccagugaccuggggu.....                                                                     | 3   | 1 | seq |
| .....ugguuuaGcacucugggacuuiuugaauccagugaccugggguuc.....                                                                   | 2   | 1 | seq |
| .....ugguuuaGcacucugggacuuiuugaauccagugaccugggguucg.....                                                                  | 4   | 1 | seq |
| .....gguuuaUcacucuggacuu.....                                                                                             | 1   | 1 | seq |
| .....gguuuaGcacucugggacuuiuugaauccagugaccugggguuc.....                                                                    | 1   | 1 | seq |
| .....guuaGcacucugggacuuiuugaauccaguu.....                                                                                 | 1   | 1 | seq |
| .....guuaGcacucugggacuuiuugaauccagugac.....                                                                               | 1   | 1 | seq |
| .....uuuaUcacucugggacuuiuugaaucc.....                                                                                     | 1   | 1 | seq |
| .....uuuaGcacucugggacuuiuugaauccaguu.....                                                                                 | 3   | 1 | seq |
| .....uuuaacacucugggacuuiuugaauccagCgaccu.....                                                                             | 1   | 1 | seq |
| .....uuuaGcacucugggacuuiuugaauccagugaccuggg.....                                                                          | 1   | 1 | seq |
| .....uuuaGcacucugggacuuiuugaauccagugaccugggguuc.....                                                                      | 2   | 1 | seq |
| .....uuuaacacucugggacuuiuugaauccagCgaccugggguucg.....                                                                     | 1   | 1 | seq |
| .....uuuaGcacucugggacuuiuugaauccagugaccugggguucg.....                                                                     | 3   | 1 | seq |
| .....uaGcacucugggacuuiuugaauccaguu.....                                                                                   | 1   | 1 | seq |
| .....uaGcacucugggacuuiuugaauccagugaccuggg.....                                                                            | 1   | 1 | seq |
| .....uaGcacucugggacuuiuugaauccagugaccuggggu.....                                                                          | 2   | 1 | seq |
| .....uaacacucugggacuuiuugaauccagCgaccugggguu.....                                                                         | 1   | 1 | seq |
| .....uaGcacucugggacuuiuugaauccagugaccugggguu.....                                                                         | 1   | 1 | seq |
| .....uaGcacucugggacuuiuugaauccagugaccugggguuc.....                                                                        | 2   | 1 | seq |
| .....aGcacucugggacuuiuugaauccagugaccugg.....                                                                              | 1   | 1 | seq |
| .....aGcacucugggacuuiuugaauccagugaccugggguu.....                                                                          | 1   | 1 | seq |
| .....aGcacucugggacuuiuugaauccagugaccugggguucg.....                                                                        | 1   | 1 | seq |
| .....Ncacucugggacuuiuuga.....                                                                                             | 1   | 1 | seq |
| .....Gcacucugggacuuiuugaauccagugaccuggggu.....                                                                            | 3   | 1 | seq |
| .....Gcacucugggacuuiuugaauccagugaccugggguuc.....                                                                          | 1   | 1 | seq |
| .....Gcacucugggacuuiuugaauccagugaccugggguucg.....                                                                         | 1   | 1 | seq |
| .....cacucugggacuuiuugaau.....                                                                                            | 2   | 0 | seq |
| .....cacucugggacuuiuugaaCc.....                                                                                           | 1   | 1 | seq |
| .....cacucugggacuuiuugaauC.....                                                                                           | 17  | 0 | seq |
| .....cacucugggacuuiuugaauCA.....                                                                                          | 4   | 1 | seq |
| .....cacucuggaUuuugaaucc.....                                                                                             | 1   | 1 | seq |
| .....cacucugggacuuiuugaaucc.....                                                                                          | 119 | 0 | seq |
| .....cacucugggacUuugaaucc.....                                                                                            | 1   | 1 | seq |
| .....cacucugggacuuiuugaaCcc.....                                                                                          | 1   | 1 | seq |
| .....cacucCggacuuiuugaaucc.....                                                                                           | 2   | 1 | seq |
| .....cacucugggacuuiuugaaucca.....                                                                                         | 19  | 0 | seq |
| .....cacucugggacuuiuugaauccC.....                                                                                         | 1   | 1 | seq |
| .....cacucugggacuuiuugaauccag.....                                                                                        | 18  | 0 | seq |
| .....Nacucugggacuuiuugaauccag.....                                                                                        | 1   | 1 | seq |
| .....cacucugggacuuiuugaauccaU.....                                                                                        | 1   | 1 | seq |
| .....cacucugggacuuiuugaauccGg.....                                                                                        | 1   | 1 | seq |
| .....cacucugggacuuiuugaauccaguu.....                                                                                      | 1   | 0 | seq |
| .....cacucugggacuuiuugaauccagugaccugg.....                                                                                | 1   | 0 | seq |
| .....cacucugggacuuiuugaauccagugaccugggguu.....                                                                            | 1   | 0 | seq |
| .....cacucugggacuuiuugaauccagugaccugggguuc.....                                                                           | 4   | 0 | seq |
| .....cacucugggacuuiuugaauccagugaccugggguuc.....                                                                           | 1   | 1 | seq |
| .....cacucugggacuuiuugaauccagugaccugggguucg.....                                                                          | 9   | 0 | seq |
| .....acucugggacUuugaauC.....                                                                                              | 1   | 1 | seq |
| .....acucugggacuuiuugaauC.....                                                                                            | 1   | 1 | seq |
| .....acucugggGcuuugaauC.....                                                                                              | 1   | 1 | seq |
| .....acucugggacuuiuugaauC.....                                                                                            | 17  | 0 | seq |
| .....acucugggacuuiuugaaucc.....                                                                                           | 32  | 0 | seq |
| .....acucugggacuuiuugaGucc.....                                                                                           | 1   | 1 | seq |
| .....acGuugggacuuiuugaaucc.....                                                                                           | 1   | 1 | seq |
| .....acucugggacuuiuugaauCA.....                                                                                           | 1   | 1 | seq |
| .....acucugggGcuuugaaucc.....                                                                                             | 1   | 1 | seq |
| .....acucugggacuuiuugaaucca.....                                                                                          | 2   | 0 | seq |
| .....acucugggacuuiuugaauccagugaccugggguuU.....                                                                            | 1   | 1 | seq |
| .....acucugggacuuiuugaauccagugaccugggguucg.....                                                                           | 1   | 0 | seq |
| .....cucugggacuuiuugaUucc.....                                                                                            | 1   | 1 | seq |
| .....cucugggacuuiuugaaucc.....                                                                                            | 1   | 1 | seq |
| .....cucugggacNuugaaucc.....                                                                                              | 1   | 1 | seq |
| .....cucugggacuuiuugaaucc.....                                                                                            | 38  | 0 | seq |

## Mature

Star

aguguauu**gg**uucua**gg**gugu**ag**gg**uu**aacacuc**gg**gacuu**g**gaa**cc**agugacc**gg**guucgaa**ccc**ggaaggaccuuuu**uc**auuacuuuu**acc**gaccaa**ca**auccu

|                                             |   |   |     |
|---------------------------------------------|---|---|-----|
| .....cucuggacuuugaaucca.....                | 4 | 0 | seq |
| .....cucuggacuuugaauccag.....               | 2 | 0 | seq |
| .....cucuAgacuuugaauccag.....               | 1 | 1 | seq |
| .....cucuggacuuugaauccagugaccugg.....       | 1 | 0 | seq |
| .....cucuggacuuugaauccagugaccugggu.....     | 1 | 0 | seq |
| .....cucuggacuuugaauccagugaccuggguu.....    | 1 | 0 | seq |
| .....cucuggacuuugaauccagugaccuggguuc.....   | 2 | 0 | seq |
| .....cucuggacuuugaauccagugaccuggguuA.....   | 1 | 1 | seq |
| .....cucuggacuuugaauccagugaccCggguucg.....  | 1 | 1 | seq |
| .....cucuggacuuugaauccagugaccuggguucg.....  | 4 | 0 | seq |
| .....ucuggacuCugaaucca.....                 | 1 | 1 | seq |
| .....ucuggacuuugaaucca.....                 | 1 | 0 | seq |
| .....ucuggacuuugaauccagugaccuggg.....       | 1 | 0 | seq |
| .....cuAgacuuugaauccag.....                 | 1 | 1 | seq |
| .....cuggacuCugaauccag.....                 | 2 | 1 | seq |
| .....cuggacuuugaauccag.....                 | 1 | 0 | seq |
| .....cuggacuCugaauccagu.....                | 3 | 1 | seq |
| .....cuggacuuugaauccagugaccuggguucg.....    | 2 | 0 | seq |
| .....uggacuuugaauccagu.....                 | 4 | 0 | seq |
| .....uggacuuugaauccagugaccug.....           | 1 | 0 | seq |
| .....uggacuuugaauccagugaccugggC.....        | 1 | 1 | seq |
| .....uggacuuugaauccagugaccugggu.....        | 1 | 0 | seq |
| .....uggacuuugaauccagugaccuggguucg.....     | 1 | 0 | seq |
| .....cuugaauccagugaccug.....                | 1 | 0 | seq |
| .....cuugaauccagugaccuggguuc.....           | 1 | 0 | seq |
| .....aauccagugaccugAgu.....                 | 1 | 1 | seq |
| .....uccagugaccugAguuc.....                 | 1 | 1 | seq |
| .....uccagugaccugAguucg.....                | 1 | 1 | seq |
| .....uccagugaccuggguucg.....                | 1 | 0 | seq |
| .....uccagugaccuggguucgaaucccgUaggacc.....  | 1 | 1 | seq |
| .....uccagugaccuggguucgaaucccgUaggaccu..... | 7 | 1 | seq |
| .....ccagugacUuggguucg.....                 | 1 | 1 | seq |
| .....cagugaccuggguucgaaucccgUaggaccu.....   | 1 | 1 | seq |
| .....gugaccuggguucgaaucccgUaggaccu.....     | 1 | 1 | seq |



| 5'      |         | -3'       | obs      |       |
|---------|---------|-----------|----------|-------|
|         |         |           | exp      |       |
| aagugaa | cuaaa   | cguu      | gaggg    | ccuc  |
| aa      | gugaa   | cuaaa     | cguu     | gaggg |
| (((     | (((     | (((       | (((      | (((   |
| reads   | mm      | sample    |          |       |
| gugaac  | cuaaa   | cgu       | Cugaggg  |       |
| 1       | 1       | seq       |          |       |
| acuaaa  | cgu     | Cugaggg   | cccu     |       |
| 1       | 1       | seq       |          |       |
| cuaaa   | cgu     | Cugaggg   | cccu     |       |
| 2       | 1       | seq       |          |       |
| cuaaa   | cgu     | Cugaggg   | cccu     |       |
| 99      | 1       | seq       |          |       |
| ucaa    | cgu     | Cugaggg   | cccu     |       |
| 3       | 1       | seq       |          |       |
| ucaa    | cgu     | Cugaggg   | cccu     |       |
| 7       | 1       | seq       |          |       |
| caa     | cgu     | Cugaggg   | cccu     |       |
| 3       | 1       | seq       |          |       |
| uggg    | aucuc   | ggaau     | gguuuc   |       |
| 12      | 0       | seq       |          |       |
| ggg     | aucuc   | ggaau     | gguuuca  |       |
| 1       | 0       | seq       |          |       |
| gg      | aucuc   | ggaau     | gguuuca  |       |
| 1       | 0       | seq       |          |       |
| gg      | aucuc   | ggaau     | gguuucac |       |
| 3       | 0       | seq       |          |       |
| g       | aucuc   | ggaau     | gguuucac |       |
| 1       | 1       | seq       |          |       |
| aucuc   | ggaau   | gguuuc    |          |       |
| 3       | 0       | seq       |          |       |
| aucuc   | ggaau   | gguuuc    | U        |       |
| 1       | 1       | seq       |          |       |
| aucuc   | ggaau   | gguuuca   |          |       |
| 2       | 0       | seq       |          |       |
| aucuc   | ggaau   | gguuucac  |          |       |
| 4       | 0       | seq       |          |       |
| aucuc   | ggaau   | gguuucac  |          |       |
| 9       | 0       | seq       |          |       |
| aucuc   | ggaau   | gguuucac  | A        |       |
| 125     | 1       | seq       |          |       |
| aCuc    | ggaau   | gguuucac  | g        |       |
| 1       | 1       | seq       |          |       |
| aucuc   | ggaau   | gguuu     | Uacug    |       |
| 1       | 1       | seq       |          |       |
| aucuc   | ggaau   | gguuuca   | Ug       |       |
| 7       | 1       | seq       |          |       |
| Nuc     | ggaau   | gguuucac  | g        |       |
| 3       | 1       | seq       |          |       |
| Uuc     | ggaau   | gguuucac  | g        |       |
| 2       | 1       | seq       |          |       |
| aucuc   | ggaau   | Uguuucac  | g        |       |
| 1       | 1       | seq       |          |       |
| aucuc   | ggaau   | ggGuucac  | g        |       |
| 2       | 1       | seq       |          |       |
| aucuc   | ggGUuuu | gguuucac  | g        |       |
| 2       | 1       | seq       |          |       |
| aucuc   | ggaau   | AGuuuucac | g        |       |
| 1       | 1       | seq       |          |       |
| aucuc   | ggaau   | gguuucac  | Cg       |       |
| 15      | 1       | seq       |          |       |
| aucuc   | ggaau   | ggCuucac  | g        |       |
| 3       | 1       | seq       |          |       |
| aucuc   | gGAuuu  | gguuucac  | g        |       |
| 4       | 1       | seq       |          |       |
| aucuc   | ggaGuu  | gguuucac  | g        |       |
| 9       | 1       | seq       |          |       |
| aucuc   | AGaa    | gguuucac  | g        |       |
| 1       | 1       | seq       |          |       |
| auc     | Cgg     | gguuuucac | g        |       |
| 7       | 1       | seq       |          |       |

## Star

## Mature

|                                                                                                                    |      |   |     |
|--------------------------------------------------------------------------------------------------------------------|------|---|-----|
| aagugaacucaaaacguuugaggggcccucgacauaagcgggugccucagguugagggaucuuccgcaugggauucucggaauugguuuacacuggaaguuugaaaaugaagga |      |   |     |
| .....aucucggaaauugguuuacacug.....                                                                                  | 2111 | 0 | seq |
| .....Gucucggaaauugguuuacacug.....                                                                                  | 6    | 1 | seq |
| .....aucucggaaauugguuuacacAg.....                                                                                  | 12   | 1 | seq |
| .....aucucggGauugguuuacacug.....                                                                                   | 11   | 1 | seq |
| .....aucucggaaauugguuuacacuU.....                                                                                  | 17   | 1 | seq |
| .....aucucUGaaauugguuuacacug.....                                                                                  | 1    | 1 | seq |
| .....aucucggaaUCggguuuacacug.....                                                                                  | 7    | 1 | seq |
| .....aucucggaaCugguuuacacug.....                                                                                   | 6    | 1 | seq |
| .....aucucggaaauugguCucacug.....                                                                                   | 5    | 1 | seq |
| .....aucucggaaauugguAucacug.....                                                                                   | 1    | 1 | seq |
| .....aucucggaaAuggguuuacacug.....                                                                                  | 2    | 1 | seq |
| .....aucuUggaauugguuuacacug.....                                                                                   | 1    | 1 | seq |
| .....auAucggaaauugguuuacacug.....                                                                                  | 1    | 1 | seq |
| .....Cucucggaaauugguuuacacug.....                                                                                  | 1    | 1 | seq |
| .....aucucggaaauugguGucacug.....                                                                                   | 1    | 1 | seq |
| .....aucucggaaauugguuuacacuC.....                                                                                  | 7    | 1 | seq |
| .....aucucggaaauAgguuuacacug.....                                                                                  | 1    | 1 | seq |
| .....aucucggaaauugUuuacacug.....                                                                                   | 5    | 1 | seq |
| .....aucucggaaauugguuCcacug.....                                                                                   | 5    | 1 | seq |
| .....aAucggaaauugguuuacacug.....                                                                                   | 3    | 1 | seq |
| .....aucucggaaauugguAuuacacug.....                                                                                 | 2    | 1 | seq |
| .....aucucggaaauugguuAcacug.....                                                                                   | 1    | 1 | seq |
| .....aucucggaUuugguuuacacug.....                                                                                   | 1    | 1 | seq |
| .....aucucggaaauugguuuacacGg.....                                                                                  | 11   | 1 | seq |
| .....aucucggaaauugguuuGcug.....                                                                                    | 5    | 1 | seq |
| .....aucucggaaauugguuuacacugg.....                                                                                 | 1    | 0 | seq |
| .....ucucggaaauugguuuuca.....                                                                                      | 1    | 0 | seq |
| .....ucucggaaauugguuuacacu.....                                                                                    | 5    | 0 | seq |
| .....ucucggaaauugguuuacacug.....                                                                                   | 5    | 0 | seq |
| .....ucucggaaauugguuuacacuA.....                                                                                   | 1    | 1 | seq |
| .....ucucgAaaauugguuuacacugg.....                                                                                  | 2    | 1 | seq |
| .....ucCcggaauugguuuacacugg.....                                                                                   | 1    | 1 | seq |
| .....ucucggaaauugguuuacacugg.....                                                                                  | 36   | 0 | seq |
| .....ucucggaaauugguuuacacugA.....                                                                                  | 4    | 1 | seq |
| .....ucucggaaauugUuuacacugg.....                                                                                   | 3    | 1 | seq |
| .....Ncucggaaauugguuuacacugg.....                                                                                  | 1    | 1 | seq |
| .....cucggaGuugguuuacacug.....                                                                                     | 1    | 1 | seq |
| .....cucggaaauugguuuacacug.....                                                                                    | 1    | 0 | seq |
| .....cucggaaauugguuuacacugg.....                                                                                   | 1    | 0 | seq |
| .....cucggaaauugguuuacacugga.....                                                                                  | 1    | 0 | seq |
| .....ucggaaauugguuuacacu.....                                                                                      | 1    | 0 | seq |
| .....ucggaaauugguuuacacuU.....                                                                                     | 1    | 1 | seq |
| .....ucggaaauugguuuacacug.....                                                                                     | 6    | 0 | seq |
| .....ucgAaaauugguuuacacuggaa.....                                                                                  | 1    | 1 | seq |
| .....Aggaaauugguuuacacug.....                                                                                      | 1    | 1 | seq |
| .....cggaauugguuuacacug.....                                                                                       | 2    | 0 | seq |
| .....uugguuuacacuggaaAuaauug.....                                                                                  | 1    | 1 | seq |

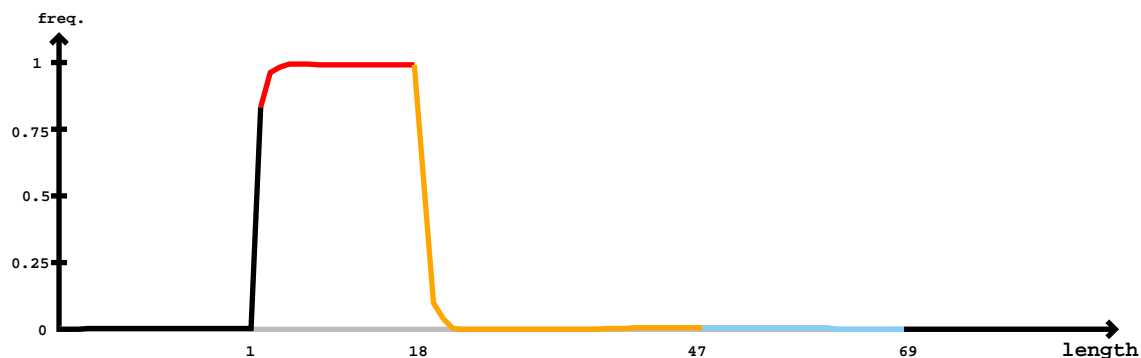

Star

|     |                                                                                                                                                           |     |        |
|-----|-----------------------------------------------------------------------------------------------------------------------------------------------------------|-----|--------|
| 5'- | ugaagagc <u>uu</u> guguaugugaggga <u>aa</u> aaggauuggccucccgauuuuaaaaa <u>uu</u> cagcuugguagccuuc <u>aa</u> uguccuagcuuuccuauuugcgagcuacuu <u>aa</u> accu | -3' | exp    |
|     | .(((((((((((.(((.(((((.((((((.(((..((((.....))))).)).).....)))))..)))).)).).....reads                                                                     | mm  | sample |
|     | .gaagagc <u>uu</u> guguaugugagggaU.....                                                                                                                   | 1   | 1seq   |
|     | .....Ggggaaaaggauuggcc.....                                                                                                                               | 1   | 1seq   |
|     | .....Cgggaaaaggauuggcc.....                                                                                                                               | 263 | 1seq   |
|     | .....Cgggaaaaggauuggccc.....                                                                                                                              | 17  | 1seq   |
|     | .....Cgggaaaaggauuggcccu.....                                                                                                                             | 5   | 1seq   |
|     | .....agggaaaaggauuggcccu.....                                                                                                                             | 1   | 0seq   |
|     | .....gggaaaaggauuggccU.....                                                                                                                               | 3   | 1seq   |
|     | .....gggaaaaggauuggccG.....                                                                                                                               | 1   | 1seq   |
|     | .....gggaaaaggauuggccA.....                                                                                                                               | 1   | 1seq   |
|     | .....gggaaaaggauuggUcc.....                                                                                                                               | 1   | 1seq   |
|     | .....gggaaaaggauuggccc.....                                                                                                                               | 18  | 0seq   |
|     | .....gggaaaaggauuggcAc.....                                                                                                                               | 3   | 1seq   |
|     | .....gggaaaaggauuggcGc.....                                                                                                                               | 1   | 1seq   |
|     | .....gggaaaGggauuggcccu.....                                                                                                                              | 1   | 1seq   |
|     | .....gggaaaaggauuggcccu.....                                                                                                                              | 6   | 0seq   |
|     | .....gggaaaaggauuggcAcu.....                                                                                                                              | 1   | 1seq   |
|     | .....gggaaaaggauuggcGcu.....                                                                                                                              | 1   | 1seq   |
|     | .....gggaaaaggauuggcccuG.....                                                                                                                             | 8   | 1seq   |
|     | .....ggaaaaggauuggcGcu.....                                                                                                                               | 1   | 1seq   |
|     | .....ggaaaaggauuggcccC.....                                                                                                                               | 1   | 1seq   |
|     | .....ggaaaaggauuggcccu.....                                                                                                                               | 3   | 0seq   |
|     | .....ggaaaaggauuggcccuG.....                                                                                                                              | 2   | 1seq   |
|     | .....gaaaaggauuggcccuG.....                                                                                                                               | 3   | 1seq   |
|     | .....gaaaaggauuggcUcucc.....                                                                                                                              | 1   | 1seq   |
|     | .....Ugc <u>uu</u> gg <u>ua</u> gcc <u>uu</u> ca <u>aa</u> gucc <u>uu</u> .....                                                                           | 1   | 1seq   |
|     | .....uugquaUccu <u>u</u> ca <u>aa</u> gucc <u>uu</u> .....                                                                                                | 1   | 1seq   |

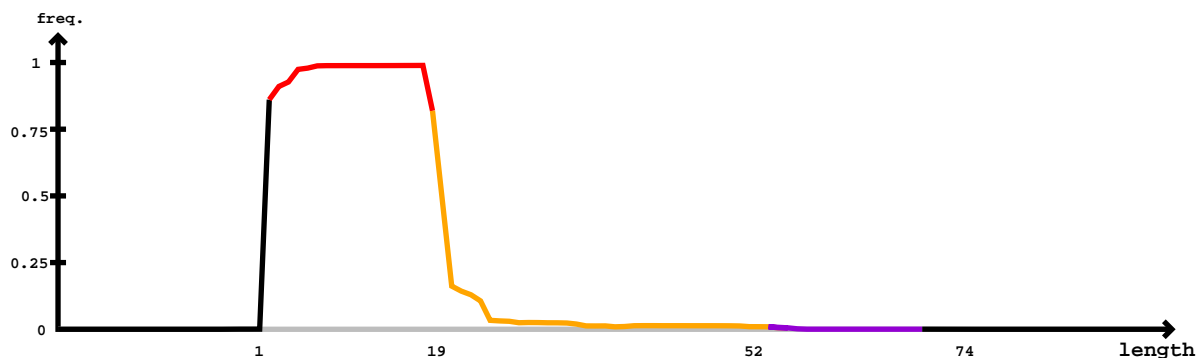

Star

[illegible]



## Mature

## Star

uguuuacugcucacagcgagcgguuuuguaguccaacgguuagguuauuugccuuccaagcaauagaccuggguuugacucccagcagacgcacccucucucuaauuuuuuuuuuuucc

|                                  |       |   |     |
|----------------------------------|-------|---|-----|
| .....gcguuuuguaguccaacg.....     | 3423  | 0 | seq |
| .....gcCuuuguaguccaacg.....      | 1     | 1 | seq |
| .....Acguuuuguaguccaacg.....     | 4     | 1 | seq |
| .....gcguuuuguaguccaacUg.....    | 66    | 1 | seq |
| .....gcguuuuguagGccaacgg.....    | 11    | 1 | seq |
| .....gcguuuuguaguccaaAgg.....    | 2     | 1 | seq |
| .....gcguuCGuaguccaacgg.....     | 38    | 1 | seq |
| .....gcguuuuguaguccaacgA.....    | 705   | 1 | seq |
| .....gcgAuuuguaguccaacgg.....    | 6     | 1 | seq |
| .....gcguuuAuuaguccaacgg.....    | 6     | 1 | seq |
| .....gcguuuuguaguccaUcgg.....    | 5     | 1 | seq |
| .....gcguuuugGaguccaacgg.....    | 1     | 1 | seq |
| .....gcguGuguaguccaacgg.....     | 2     | 1 | seq |
| .....gcguuuuguaguAcaacgg.....    | 2     | 1 | seq |
| .....gcguuuuguaguccaGcgg.....    | 41    | 1 | seq |
| .....gcCuuuguaguccaacgg.....     | 2     | 1 | seq |
| .....gcguuuuguGuccaacgg.....     | 19    | 1 | seq |
| .....Ucguuuuguaguccaacgg.....    | 11    | 1 | seq |
| .....gcguuuuguaguccaaGgg.....    | 6     | 1 | seq |
| .....gcgGuuguaguccaacgg.....     | 4     | 1 | seq |
| .....gcguuuuguaguccaacgU.....    | 119   | 1 | seq |
| .....gcguuuuguCGuccaacgg.....    | 1     | 1 | seq |
| .....gGguuuuguaguccaacgg.....    | 3     | 1 | seq |
| .....gcguuuugAaguccaacgg.....    | 2     | 1 | seq |
| .....gcguCuguaguccaacgg.....     | 21    | 1 | seq |
| .....gcguuuugCaguccaacgg.....    | 32    | 1 | seq |
| .....gcguuuuguaguUcaacgg.....    | 5     | 1 | seq |
| .....gcguuuuguUguccaacgg.....    | 1     | 1 | seq |
| .....gcguuuuguaguccaCcg.....     | 2     | 1 | seq |
| .....Ncguuuuguaguccaacgg.....    | 20    | 1 | seq |
| .....gcguuuuguaguccaacgC.....    | 89    | 1 | seq |
| .....gcguuuuguaguuccCacgg.....   | 2     | 1 | seq |
| .....Acguuuuguaguccaacgg.....    | 14    | 1 | seq |
| .....gAguuuuguaguccaacgg.....    | 3     | 1 | seq |
| .....gcguuuuguagCccaacgg.....    | 23    | 1 | seq |
| .....gcguuuuguaguccAaacgg.....   | 1     | 1 | seq |
| .....Ccguuuuguaguccaacgg.....    | 3     | 1 | seq |
| .....gcguuuuguaguccaacgg.....    | 11153 | 0 | seq |
| .....gcguuAguaguccaacgg.....     | 6     | 1 | seq |
| .....gcguuuuguaguccUacgg.....    | 6     | 1 | seq |
| .....gcguuuUuuaguccaacgg.....    | 1     | 1 | seq |
| .....gcguuuuguaguccaacCg.....    | 19    | 1 | seq |
| .....gcguuuuguaguccaacAg.....    | 74    | 1 | seq |
| .....gcguuuugGaguccaacgggu.....  | 1     | 1 | seq |
| .....gcguuuAuuaguccaacgggu.....  | 1     | 1 | seq |
| .....gcguuCGuaguccaacgggu.....   | 4     | 1 | seq |
| .....gcguuuuguagAccaacgggu.....  | 2     | 1 | seq |
| .....gcguuuuguaguccaacUgu.....   | 6     | 1 | seq |
| .....gcguuuuguaguccaacggG.....   | 31    | 1 | seq |
| .....gcguuuuguaguccaGcgggu.....  | 3     | 1 | seq |
| .....gcguuuuguaguccaaAggu.....   | 1     | 1 | seq |
| .....gcguuuuguaguccaacggC.....   | 170   | 1 | seq |
| .....gcguuuuguaguccaacgggu.....  | 970   | 0 | seq |
| .....Ncguuuuguaguccaacgggu.....  | 3     | 1 | seq |
| .....gcguuuuguaguccaacgCu.....   | 2     | 1 | seq |
| .....gcguuuugCaguccaacgggu.....  | 3     | 1 | seq |
| .....gcguuuuguagCccaacgggu.....  | 4     | 1 | seq |
| .....gcguuuuguaguccCacgggu.....  | 1     | 1 | seq |
| .....gcguuuuguGuccaacgggu.....   | 3     | 1 | seq |
| .....Acguuuuguaguccaacgggu.....  | 2     | 1 | seq |
| .....gcguuAguaguccaacgggu.....   | 1     | 1 | seq |
| .....gcguCuuguaguccaacgggu.....  | 2     | 1 | seq |
| .....gcgGuuguaguccaacgggu.....   | 1     | 1 | seq |
| .....gcguGuguaguccaacgggu.....   | 1     | 1 | seq |
| .....gcguuuuguaguccaacAgu.....   | 2     | 1 | seq |
| .....gcguuuuguUguccaacgggu.....  | 3     | 1 | seq |
| .....gcguuuuguaguccaaUgggu.....  | 2     | 1 | seq |
| .....gcguuuuguaguccaacggCu.....  | 1     | 1 | seq |
| .....gcguuuuguaguccaacggGu.....  | 3     | 1 | seq |
| .....gcguuuuguaguccaacggguA..... | 12    | 1 | seq |

## Mature

## Star

uguuuacugcucacagcgagcgguuuuguaguccaacggguuagguuauuugccuuccaagcaauagaccuggguuugacucccagcagacgccuccucucuaauuuuuuuuuuuucc

|                                         |     |   |     |
|-----------------------------------------|-----|---|-----|
| .....gcguuuuguaguccaacggguG.....        | 3   | 1 | seq |
| .....gcguuCGuaguccaacgggu.....          | 1   | 1 | seq |
| .....gcguuuuguaguccaacgggu.....         | 123 | 0 | seq |
| .....gcguuuuguaguccaacggguC.....        | 19  | 1 | seq |
| .....gcguuuuguagAccaacgggu.....         | 1   | 1 | seq |
| .....gcguuuuguaguccaacUguu.....         | 19  | 1 | seq |
| .....gcguuuuguaguccaCcggu.....          | 1   | 1 | seq |
| .....gcguuugCaguccaacgggu.....          | 1   | 1 | seq |
| .....gcguCuguaguccaacgggu.....          | 1   | 1 | seq |
| .....gcguuuuguaguccaaUgggu.....         | 2   | 1 | seq |
| .....gcguuuuguaguccaacggguG.....        | 2   | 1 | seq |
| .....gcguuuuguaguccaacgAuua.....        | 1   | 1 | seq |
| .....gcguuuuguaguccaacUguua.....        | 1   | 1 | seq |
| .....gcguuuuguaguccaacggguua.....       | 51  | 0 | seq |
| .....gcguuuuguaguccaacggAuua.....       | 3   | 1 | seq |
| .....gcguuuuguaguccaGcgguua.....        | 1   | 1 | seq |
| .....gcguuuuguaguccaacggguCa.....       | 2   | 1 | seq |
| .....gcCuuguaguccaacggguua.....         | 1   | 1 | seq |
| .....gcgGuuguaguccaacggguuag.....       | 1   | 1 | seq |
| .....gcguuuuguaguccaaUggguuag.....      | 1   | 1 | seq |
| .....gcguuuuguaguccaacggguuaA.....      | 3   | 1 | seq |
| .....gcguuuuguagAccaacggguuag.....      | 2   | 1 | seq |
| .....Ncgguuuuguaguccaacggguuag.....     | 1   | 1 | seq |
| .....gcguuuuguaguccaacggguCag.....      | 9   | 1 | seq |
| .....gcguuuuguaguccaacggguuag.....      | 133 | 0 | seq |
| .....gcguuuuguaguccaacUguuag.....       | 3   | 1 | seq |
| .....gcguuGguaguccaacggguuag.....       | 1   | 1 | seq |
| .....gcguuuuguaguccaacggguUg.....       | 1   | 1 | seq |
| .....gcgCuuguaguccaacggguuag.....       | 1   | 1 | seq |
| .....gcguuCGuaguccaacggguuagg.....      | 2   | 1 | seq |
| .....gcguuugAuaguccaacggguuagg.....     | 1   | 1 | seq |
| .....gcguuuuguaguccaaUggguagg.....      | 1   | 1 | seq |
| .....gcguuuuguaguccaUcgguuagg.....      | 1   | 1 | seq |
| .....gcguuuuguaguccaacggguAagg.....     | 1   | 1 | seq |
| .....Ccguuuuguaguccaacggguuagg.....     | 1   | 1 | seq |
| .....gcguuuuguagCccaacggguuagg.....     | 2   | 1 | seq |
| .....gcguuuuguaguccaacggguuagg.....     | 856 | 0 | seq |
| .....gcguuuuguuaAuuccaacggguuagg.....   | 1   | 1 | seq |
| .....Ncgguuuuguaguccaacggguuagg.....    | 2   | 1 | seq |
| .....gcgCuuguaguccaacggguuagg.....      | 1   | 1 | seq |
| .....gcguuuuguaguccaacggguuaAg.....     | 4   | 1 | seq |
| .....gcguuugCaguccaacggguuagg.....      | 1   | 1 | seq |
| .....gcguuuuguaguccaacUguuagg.....      | 8   | 1 | seq |
| .....gcguuuuguagAccaacggguuagg.....     | 2   | 1 | seq |
| .....gcguuuuguaguccGacggguuagg.....     | 3   | 1 | seq |
| .....gcguCuguaguccaacggguuagg.....      | 1   | 1 | seq |
| .....Ucgguuuuguaguccaacggguuagg.....    | 1   | 1 | seq |
| .....gcguuuuguaguccaacggguuaUg.....     | 1   | 1 | seq |
| .....gcguuuAuaguccaacggguuagg.....      | 1   | 1 | seq |
| .....gcguuuuguaguccaacggguuagU.....     | 8   | 1 | seq |
| .....gcguuuuguaguccaacggguGagg.....     | 1   | 1 | seq |
| .....gcguuuuguaguccaacggguCagg.....     | 76  | 1 | seq |
| .....gcguuuuguaguccaacggguUGgg.....     | 3   | 1 | seq |
| .....gcguuuuguaguccaacggAuagg.....      | 1   | 1 | seq |
| .....gcguuuuguGguuccaacggguuagg.....    | 3   | 1 | seq |
| .....gcguuuuguaguccaGcgguuagg.....      | 6   | 1 | seq |
| .....gcguuuuguaguccaacggguuaggC.....    | 1   | 1 | seq |
| .....gcguuuuguaguccaacggguuaggG.....    | 37  | 1 | seq |
| .....gcguuuuguaguccaacggguCaggu.....    | 1   | 1 | seq |
| .....gcguuuuguaguccaacggguuagggu.....   | 14  | 0 | seq |
| .....gcguuuuguaguccaacggguuaggguA.....  | 1   | 1 | seq |
| .....gcguuuuguaguccaacggguuaggGu.....   | 24  | 1 | seq |
| .....gcguuuuguaguccaacggguuaggguu.....  | 4   | 0 | seq |
| .....gcguuuuguaguccaacggguuaggAu.....   | 1   | 1 | seq |
| .....gcguuuuguaguccaacggguuaggCu.....   | 1   | 1 | seq |
| .....gcguuuuguaguccaacggguuaggguC.....  | 1   | 1 | seq |
| .....gcguuuuguaguccaacggguuaggguua..... | 12  | 0 | seq |
| .....gcguuuuguaguccaacggguuaggGuua..... | 103 | 1 | seq |
| .....gcguuuuguaguccaacggguCaggguua..... | 1   | 1 | seq |
| .....gcguuuuguaguccaacggguuaggCu.....   | 5   | 1 | seq |

## Mature

## Star

uguuAACuGcuCaGcGagGcgguuGuaguccaAcgguuagguuaauugccuuccaagcaauagaccuggguuugacucccagcagacgcacccucucuaauuuuuuuuuucc

|                                                       |     |   |     |
|-------------------------------------------------------|-----|---|-----|
| .gcguuuguaGuccaAcgguuagggNuaau.                       | 1   | 1 | seq |
| .gcguuuguaGuccaAcgguuagggGuaau.                       | 6   | 1 | seq |
| .gcguuuguaGuccaAcgguuagggGuaauu.                      | 13  | 1 | seq |
| .gcguuuguaGuccaAcgguuagggCuaauu.                      | 1   | 1 | seq |
| .gcguuuguaGuccaAcgguuagguuaauu.                       | 1   | 0 | seq |
| .gcguuuguaGuccaAcgguuagggGuaauug.                     | 6   | 1 | seq |
| .gcguuuguaGuccaAcgguuagguuaauug.                      | 2   | 0 | seq |
| .gcguuuguaGuccaAcgguuagggGuaauugc.                    | 4   | 1 | seq |
| .gcguuuguaGuccaAcgguuagggGuaauugcc.                   | 51  | 1 | seq |
| .gcguuuguaGuccaAcgguuagggCuaauugcc.                   | 2   | 1 | seq |
| .gcguuuguaGuccaAcgguuagguuaauugcc.                    | 5   | 0 | seq |
| .gcguuuguaGuccaAcgguuagggCuaauugccu.                  | 2   | 1 | seq |
| .gcguuuguaGuccaAcgguuagguuaauugccC.                   | 2   | 1 | seq |
| .gcguuuguaGuccaAcgguuagggGuaauugccu.                  | 33  | 1 | seq |
| .gcguuuguaGuccaAcgguuagguuaauugccu.                   | 6   | 0 | seq |
| .gcguuuguaGuccaAcgguuagguuaauugccA.                   | 2   | 1 | seq |
| .gcguuuguaGuccaAcgguuagguuaauugccG.                   | 2   | 1 | seq |
| .gcguuuguaGuccaAcgguuagggCuaauugccu.                  | 1   | 1 | seq |
| .gcguuuguaGuccaAcgguuagggGuaauugccu.                  | 2   | 1 | seq |
| .gcguuuguaGuccaAcgguuagggGuaauugccuuc.                | 12  | 1 | seq |
| .gcguuuguaGuccaAcgguuagguuaauugccuuc.                 | 1   | 0 | seq |
| .gcguuuguaGuccaAcgguuagguuaauugccuucA.                | 1   | 1 | seq |
| .gcguuuguaGuccaAcgguuagguuaauugccuucc.                | 6   | 0 | seq |
| .gcguuuguaGuccaAcgguuagguuaauugccuucU.                | 1   | 1 | seq |
| .gcguuuguaGuccaGcgguuagguuaauugccuucc.                | 1   | 1 | seq |
| .gcguuuguaGuccaAcgguuagggGuaauugccuucc.               | 86  | 1 | seq |
| .gcguuuguaGuccaAcgguuagggCuaauugccuucc.               | 1   | 1 | seq |
| .gcguuuguaGuccaAcgguuagggGuaauugccuucca.              | 2   | 1 | seq |
| .gcguuuguaGuccaAcgguuagguuaauugccGuccaagc.            | 1   | 1 | seq |
| .gcguuuguaGuccaAcgguuagggGuaauugccuuccaagcaau.        | 2   | 1 | seq |
| .gcguuuguaGuccaAcgguuagggGuaauugccuuccaagcaaua.       | 1   | 1 | seq |
| .gcguuuguaGuccaAcgguuagggGuaauugccuuccaagcaauagaccug. | 44  | 1 | seq |
| .gcguuuguaGuccaAcgguuagggGuaauugccuuccaagcaauagaccug. | 1   | 1 | seq |
| .cgGuuGuaguccaAcgG.                                   | 1   | 1 | seq |
| .cgGuuGuGuccaAcgG.                                    | 3   | 1 | seq |
| .cgGuuGuaguccaGcgG.                                   | 2   | 1 | seq |
| .cgGuuGuagCccaAcgG.                                   | 2   | 1 | seq |
| .cgGuGuaguccaAcgG.                                    | 2   | 1 | seq |
| .cgGuuGuaguccaAcUg.                                   | 3   | 1 | seq |
| .cgGuuGuaguccUacgG.                                   | 1   | 1 | seq |
| .cgGuuGuaguccaAcgC.                                   | 5   | 1 | seq |
| .cgGuuGuaguccaAcgU.                                   | 11  | 1 | seq |
| .cgGuuGuaguccCacgG.                                   | 1   | 1 | seq |
| .cgGuuGuaguccaAcCg.                                   | 1   | 1 | seq |
| .cgGuuGuaguccaAcgG.                                   | 1   | 1 | seq |
| .cgGuuGGuaguccaAcgG.                                  | 1   | 1 | seq |
| .cgGuuGGuaguccaAcgG.                                  | 4   | 1 | seq |
| .cgGuuGuaguccaAcgA.                                   | 48  | 1 | seq |
| .cgGuuGuaguccaAcAg.                                   | 3   | 1 | seq |
| .cgGuuGuaguUcaAcgG.                                   | 1   | 1 | seq |
| .GGuuGuaguccaAcgG.                                    | 1   | 1 | seq |
| .cgGuuGuaguccaAcgG.                                   | 765 | 0 | seq |
| .cgGuuGuaguccaAcgG.                                   | 1   | 1 | seq |
| .cgGuuGuaguccaAcgGu.                                  | 111 | 0 | seq |
| .cgGuuGuaguccaAcgG.                                   | 26  | 1 | seq |
| .cgGuuGuaguccaAcgG.                                   | 6   | 1 | seq |
| .cgGuuGuaguccaAcgGuC.                                 | 2   | 1 | seq |
| .cgGuuGuaguccaAcgGuua.                                | 6   | 0 | seq |
| .cgGuuGuaguccaAcgGuuag.                               | 3   | 0 | seq |
| .cgGuuGuaguccaAcgGuCag.                               | 2   | 1 | seq |
| .cgGuuGuaguccaAcgGuCagg.                              | 10  | 1 | seq |
| .cgGuuGuaguccaAcgGuuagG.                              | 73  | 0 | seq |
| .cgGuuGuaguccaAcgGuuagG.                              | 1   | 1 | seq |
| .cgGuuGuaguccaAcgGuuagGGu.                            | 1   | 1 | seq |
| .cgGuuGuaguccaAcgGuuagGGu.                            | 1   | 1 | seq |
| .cgGuuGuaguccaAcgGuuagGGuauu.                         | 1   | 1 | seq |
| .cgGuuGuaguccaAcgGuuagGGuauuug.                       | 2   | 1 | seq |
| .cgGuuGuaguccaAcgGuuagGGuauuugc.                      | 1   | 1 | seq |
| .cgGuuGuaguccaAcgGuuagGGuauuugc.                      | 1   | 1 | seq |
| .cgGuuGuaguccaAcgGuuagGGuauuugcc.                     | 5   | 1 | seq |

## Mature

## Star

uguuuacugcucacagcagagcgguuuuguaguccaacggguuagguuauugccuuccaagcaauagaccuggguuugacucccagcagacgcaccucucucuaauuuuuuuuuucc

|                                                                 |     |   |     |
|-----------------------------------------------------------------|-----|---|-----|
| .....cguuuuguaguccaacggguuagguuauuugcc.....                     | 1   | 0 | seq |
| .....cguuuuguaguccaacggguuagguuauuugccu.....                    | 2   | 0 | seq |
| .....cguuuuguaguccaacggguuagggGuaauugccu.....                   | 7   | 1 | seq |
| .....cguuuuguaguccaacggguuagggAuaauugccuuccaagcaauagaccugg..... | 1   | 1 | seq |
| .....guuuuguaguccaaAaggu.....                                   | 1   | 1 | seq |
| .....guuuuguagCccaacgggu.....                                   | 1   | 1 | seq |
| .....Cuuuuguaguccaacgggu.....                                   | 1   | 1 | seq |
| .....guuuuguaguccaacggG.....                                    | 17  | 1 | seq |
| .....guuuuguGguccaacgggu.....                                   | 1   | 1 | seq |
| .....guuuuguaguccaCcggu.....                                    | 1   | 1 | seq |
| .....guuuuguaguccaacggG.....                                    | 8   | 1 | seq |
| .....guuCGuaguccaacgggu.....                                    | 1   | 1 | seq |
| .....guGguaguccaacgggu.....                                     | 1   | 1 | seq |
| .....guuuuguaguccaacggUu.....                                   | 1   | 1 | seq |
| .....guuuuguaguccaacggCu.....                                   | 1   | 1 | seq |
| .....guuuuguaguccaacgggu.....                                   | 122 | 0 | seq |
| .....guuuuguaguccaacggguC.....                                  | 3   | 1 | seq |
| .....guuuuguaguccaacggguu.....                                  | 14  | 0 | seq |
| .....guuuuguaguccaacggGu.....                                   | 1   | 1 | seq |
| .....guuuuguaguccaacggguA.....                                  | 2   | 1 | seq |
| .....guuuuguaguccaacggguCa.....                                 | 3   | 1 | seq |
| .....guuuuguaguccaacggguua.....                                 | 23  | 0 | seq |
| .....guuuuguaguccaacggguuag.....                                | 24  | 0 | seq |
| .....guuuuguaguccaacggguCag.....                                | 1   | 1 | seq |
| .....guuuuguaguccaacggguuaA.....                                | 1   | 1 | seq |
| .....guuuuguaguccaacggguAag.....                                | 1   | 1 | seq |
| .....guuuuguaguccaGcgguuag.....                                 | 1   | 1 | seq |
| .....guuuuguaguccaacggguCagg.....                               | 10  | 1 | seq |
| .....guuuuguagCccaacggguuaggg.....                              | 2   | 1 | seq |
| .....guuuuguaguccaacggguuaggg.....                              | 96  | 0 | seq |
| .....Cuuuuguaguccaacggguuaggg.....                              | 1   | 1 | seq |
| .....guuuuguaguccaacggguuaggggu.....                            | 1   | 0 | seq |
| .....guuuuguaguccaacggguuagggG.....                             | 4   | 1 | seq |
| .....guuuuguaguccaacggguuagggGu.....                            | 2   | 1 | seq |
| .....guuuuguaguccaacggguuagggGua.....                           | 3   | 1 | seq |
| .....guuuuguaguccaacggguuagggCuaauu.....                        | 1   | 1 | seq |
| .....guuuuguaguccaacggguuagggGuaauu.....                        | 1   | 1 | seq |
| .....guuuuguaguccaacggguuagggguuauuug.....                      | 1   | 0 | seq |
| .....guuuuguaguccaacggguuagggGuaauug.....                       | 1   | 1 | seq |
| .....guuuuguaguccaacggguuagggGuaauugc.....                      | 10  | 1 | seq |
| .....guuuuguaguccaacggguuagggGuaauugcc.....                     | 1   | 1 | seq |
| .....guuuuguaguccaacggguuagggGuaauugccu.....                    | 12  | 1 | seq |
| .....guuuuguaguccaacggguuagggCuaauugccu.....                    | 1   | 1 | seq |
| .....guuuuguaguccaacggguuagggguuauuugccu.....                   | 4   | 0 | seq |
| .....guuuuguaguccaacggguuagggGuaauugccu.....                    | 1   | 1 | seq |
| .....guuuuguaguccaacggguuagggAuaauugccuuccaagcaauagaccu.....    | 1   | 1 | seq |
| .....uuuguaguccaacggguG.....                                    | 3   | 1 | seq |
| .....uuuguaguccaacggGu.....                                     | 1   | 1 | seq |
| .....uuuguaguccaacggguu.....                                    | 162 | 0 | seq |
| .....uuuguaguccaacggguA.....                                    | 13  | 1 | seq |
| .....uuuguagCccaacggguu.....                                    | 1   | 1 | seq |
| .....uuuguaguccaacggguC.....                                    | 38  | 1 | seq |
| .....uCuuguaguccaacggguu.....                                   | 3   | 1 | seq |
| .....Cuuguaguccaacggguua.....                                   | 1   | 1 | seq |
| .....uuuguaguccaacggguCa.....                                   | 20  | 1 | seq |
| .....uuuguaguccaacggguuG.....                                   | 2   | 1 | seq |
| .....uuuguaguccaacggguuC.....                                   | 1   | 1 | seq |
| .....uuuguaguccaacggguGa.....                                   | 1   | 1 | seq |
| .....uuuguaguccaacggguAa.....                                   | 1   | 1 | seq |
| .....uuuguaguccaacggguua.....                                   | 168 | 0 | seq |
| .....uuuguaguccaacggguuag.....                                  | 187 | 0 | seq |
| .....uuuguaguccaacggguuUg.....                                  | 1   | 1 | seq |
| .....uuuguaguccaacggguuaA.....                                  | 7   | 1 | seq |
| .....uuuguGguccaacggguuag.....                                  | 1   | 1 | seq |
| .....uuuguagCccaacggguuag.....                                  | 1   | 1 | seq |
| .....uuuguaguccaaUggguuag.....                                  | 1   | 1 | seq |
| .....uuuguaguccaacggGuag.....                                   | 1   | 1 | seq |
| .....uuuguaguccaacggguuGg.....                                  | 1   | 1 | seq |
| .....uuuguaguccaacggguCag.....                                  | 14  | 1 | seq |
| .....uuuguaguccaacggguAag.....                                  | 1   | 1 | seq |

## Mature

## Star

uguuAACUGCUCACAGCGAGGCGUUUGUAGUCCAAACGGUUAGGUUAAUUGCCUUCCAAGCAAUAGACCUGGGUUUGACUCCAGCAGACGCACCCUCUCUAAUUUUUUUUUUUCC

|                                                             |     |   |     |
|-------------------------------------------------------------|-----|---|-----|
| .....uuuguagCccaaCGguuagg.....                              | 1   | 1 | seq |
| .....uuuguaguccGacggguuagg.....                             | 1   | 1 | seq |
| .....uuuguaguccaaCGguuagg.....                              | 305 | 0 | seq |
| .....uuuguaguGcaaCGguuagg.....                              | 1   | 1 | seq |
| .....CuuguaguccaaCGguuagg.....                              | 1   | 1 | seq |
| .....uuuAuaguccaaCGguuagg.....                              | 1   | 1 | seq |
| .....NuuguaguccaaCGguuagg.....                              | 1   | 1 | seq |
| .....uuuguaguccaaCGguCagg.....                              | 21  | 1 | seq |
| .....uuuguaguccaaCGuuagg.....                               | 1   | 1 | seq |
| .....uuuguaAuccaaCGguuagg.....                              | 1   | 1 | seq |
| .....uuCGuaguccaaCGguuagg.....                              | 1   | 1 | seq |
| .....uuuguaguccaaCGguUGg.....                               | 1   | 1 | seq |
| .....uuuguaguccaaCGguuagg.....                              | 1   | 0 | seq |
| .....uuuguaguccaaCGguuaggCua.....                           | 1   | 1 | seq |
| .....uuuguaguccaaCGguuagguuauu.....                         | 1   | 0 | seq |
| .....uuuguaguccaaCGguuaggGuaauug.....                       | 1   | 1 | seq |
| .....uuuguaguccaaCGguuagguuauuugc.....                      | 1   | 0 | seq |
| .....uuuguaguccaaCGguuaggCuaauugc.....                      | 1   | 1 | seq |
| .....GuuguaguccaaCGguuagguuauuugc.....                      | 1   | 1 | seq |
| .....uuuguaguccaaCGguuaggGuaauugc.....                      | 2   | 1 | seq |
| .....uuuguaguccaaCGguuaggGuaauugcc.....                     | 16  | 1 | seq |
| .....uuuguaguccaaCGguuagguuauuugcc.....                     | 2   | 0 | seq |
| .....uuuguaguccaaCGguuagguuauuugcU.....                     | 1   | 1 | seq |
| .....uuuguaguccaaCGguuagguuauuugccC.....                    | 2   | 1 | seq |
| .....uuuguaguccaaCGguuagguuauuugccu.....                    | 4   | 0 | seq |
| .....uuuguaguccaaCGguuaggCuaauugccu.....                    | 3   | 1 | seq |
| .....uuuguaguccaaCGguuaggGuaauugccu.....                    | 59  | 1 | seq |
| .....uuuguaguccaaCGguuaggGuaauugccuu.....                   | 2   | 1 | seq |
| .....uuuguaguccaaCGguuaggGuaauugccuuc.....                  | 1   | 1 | seq |
| .....uuuguaguccaaCGguuaggGuaauugccuucca.....                | 1   | 1 | seq |
| .....uuuguaguccaaCGguuaggAuauuugccuuccaagcaauagaccu.....    | 1   | 1 | seq |
| .....uuuguaguccaaCGguuaggAuauuugccuuccaagcaauagaccuggu..... | 1   | 1 | seq |
| .....uuguaguccaaCGguua.....                                 | 19  | 0 | seq |
| .....uuuguaguccaaCGguCag.....                               | 5   | 1 | seq |
| .....uuuguaguccaaCGguuag.....                               | 33  | 0 | seq |
| .....uuuguaguccaaCGguuagg.....                              | 36  | 0 | seq |
| .....uuuguaguccaaCGguCagg.....                              | 2   | 1 | seq |
| .....uuuguaguccaaCGguuagguuauuug.....                       | 1   | 0 | seq |
| .....uuuguaguccaaCGguuaggGuaauugc.....                      | 1   | 1 | seq |
| .....uuuguaguccaaCGguuaggGuaauugcc.....                     | 2   | 1 | seq |
| .....uuuguaguccaaCGguuaggGuaauugccu.....                    | 7   | 1 | seq |
| .....uuuguaguccaaCGguuaggGuaauugccuuc.....                  | 1   | 1 | seq |
| .....uguaguccaaCGguUG.....                                  | 1   | 1 | seq |
| .....uguaguccaaCGguCag.....                                 | 4   | 1 | seq |
| .....uguaguUcaacCGguuag.....                                | 1   | 1 | seq |
| .....uguagCccaaCGguuag.....                                 | 1   | 1 | seq |
| .....uguaguccaaCGguuag.....                                 | 80  | 0 | seq |
| .....uguaguccaGcgguuag.....ugccuuc.....                     | 1   | 1 | seq |
| .....uguaguccaaCGguCagg.....                                | 5   | 1 | seq |
| .....CGuaguccaaCGguuagg.....                                | 2   | 1 | seq |
| .....uguaguccaGcgguuagg.....                                | 1   | 1 | seq |
| .....uguaguccaaCGguuagU.....                                | 1   | 1 | seq |
| .....uguaguccaaCGgAuagg.....                                | 1   | 1 | seq |
| .....uguaguccaaCGguuagg.....                                | 74  | 0 | seq |
| .....uguaguccaaCGguuaggguua.....                            | 1   | 0 | seq |
| .....uguaguccaaCGguuaggguaaC.....                           | 1   | 1 | seq |
| .....uguaguccaaCGguuaggGuaauug.....                         | 2   | 1 | seq |
| .....uguaguccaaCGguuaggGuaauugcc.....                       | 7   | 1 | seq |
| .....uguaguccaaCGguuaggGuaauugccu.....                      | 8   | 1 | seq |
| .....uguaguccaaCGguuagguuauuugccu.....                      | 1   | 0 | seq |
| .....uguaguccaaCGguuaggGuaauugccuuc.....                    | 1   | 1 | seq |
| .....uguaguccaaCGguuaggAuauuugccuuccaagcaauagaccugg.....    | 1   | 1 | seq |
| .....guaguccaaCGguuagg.....                                 | 15  | 0 | seq |
| .....guaguccaaCGguCagg.....                                 | 2   | 1 | seq |
| .....guaguccaaCGguuaggGuaauugc.....                         | 1   | 1 | seq |
| .....aguccaaCGguuaggAuauuugccuuccaagcaauagaccugggu.....     | 1   | 1 | seq |
| .....aguccaaCGguuaggAuauuugccuuccaagcaauagaccugggu.....     | 1   | 1 | seq |
| .....uccaaCGguuaggAuauuugccuuccaagcaauagaccugggu.....       | 1   | 1 | seq |
| .....ccaacCGguuaggGuaauugccu.....                           | 1   | 1 | seq |

## Mature

## Star

uguuuacugcucacagcgagggcguuuguaguccaacggguuagguuauuugccuuccaagcaauagaccuggguuugacucccagcagacgacccucucuaauuuuuuuuuucc

|                                                     |   |   |     |
|-----------------------------------------------------|---|---|-----|
| .....caacggguuaggGuaauugcc.....                     | 1 | 1 | seq |
| .....caacggguuaggGuaauugccuuccaagcaauagaccugg.....  | 1 | 1 | seq |
| .....aacggguuaggGuaauugccuuccaagcaauagaccugggu..... | 2 | 1 | seq |
| .....acggguuaggGuaauugccuuccaagcaauagaccu.....      | 3 | 1 | seq |
| .....acggguuaggGuaauugccuuccaagcaauagaccuggg.....   | 1 | 1 | seq |
| .....cggguuaggGuaauugccuuccaagcaauagaccugggu.....   | 3 | 1 | seq |
| .....ggguuaggGuaauugccuuccaagcaauagaccuggg.....     | 1 | 1 | seq |
| .....ggguuaggGuaauugccuuccaagcaauagaccugggu.....    | 3 | 1 | seq |
| .....guuaggGuaauugccuuccaagcaauagaccu.....          | 1 | 1 | seq |
| .....guuaggGuaauugccuuccaagcaauagaccugggu.....      | 3 | 1 | seq |
| .....uuaggGuaauugccuuccaagcaauagaccu.....           | 1 | 1 | seq |
| .....uuaggGuaauugccuuccaagcaauagaccugggu.....       | 3 | 1 | seq |
| .....uaggGuaauugccuuccaagcaauagaccu.....            | 1 | 1 | seq |
| .....uaggGuaauugccuuccaagcaauagaccug.....           | 1 | 1 | seq |
| .....uaggGuaauugccuuccaagcaauagaccuggg.....         | 1 | 1 | seq |
| .....aggGuaauugccuuccaagcaauagaccug.....            | 1 | 1 | seq |
| .....aggGuaauugccuuccaagcaauagaccugggu.....         | 1 | 1 | seq |
| .....ggGuaauugccuuccaagcaauagaccugggu.....          | 2 | 1 | seq |
| .....gGuaauugccuuccaagcaauagaccu.....               | 1 | 1 | seq |
| .....gGuaauugccuuccaagcaauagaccugggu.....           | 6 | 1 | seq |
| .....Guaauugccuuccaagcaauagaccug.....               | 1 | 1 | seq |
| .....Guaauugccuuccaagcaauagaccuggg.....             | 1 | 1 | seq |
| .....Guaauugccuuccaagcaauagaccugggu.....            | 1 | 1 | seq |
| .....uaauugccuuccaagca.....                         | 3 | 0 | seq |
| .....uaauugccuuccaagcG.....                         | 1 | 1 | seq |
| .....uaauugccuuccaagcaauagac.....                   | 1 | 0 | seq |
| .....uaauugccuuccaagcaauagaccug.....                | 1 | 0 | seq |
| .....uaauugccuuccaagcaauagaccugggu.....             | 3 | 0 | seq |
| .....uaauugccuuccaagcaauagaccugggC.....             | 1 | 1 | seq |
| .....uaauugccuuccaagcaauagaccuggguuG.....           | 1 | 1 | seq |
| .....aaauugccuuccaagcaauagaccugggu.....             | 2 | 0 | seq |
| .....aaauugccuuccaagcaauagaccuggguuG.....           | 1 | 1 | seq |
| .....auugccuuccaagcaauag.....                       | 1 | 0 | seq |
| .....auugccuuccaagcaauGgacc.....                    | 1 | 1 | seq |
| .....auugccuuccaagcaauagaccA.....                   | 1 | 1 | seq |
| .....auugccuuccaagcaauagaccuggguuG.....             | 1 | 1 | seq |
| .....auugccuuccaagcaauagaccuggguuAg.....            | 1 | 1 | seq |
| .....uugccuuccaagcaauagaccug.....                   | 6 | 0 | seq |
| .....uugccuuccaagcaauagaccuggg.....                 | 2 | 0 | seq |
| .....uugccuuccaagcaauagaccugggG.....                | 1 | 1 | seq |
| .....uugccuuccaagcaauagaccugggC.....                | 1 | 1 | seq |
| .....uugccuuccaagcGauagaccugggu.....                | 1 | 1 | seq |
| .....uugccuuccaagGauagaccugggu.....                 | 1 | 1 | seq |
| .....uugccuuccaagcaauagaccugggu.....                | 4 | 0 | seq |
| .....uugccuuccaagcaauagaccuggguu.....               | 1 | 0 | seq |
| .....ugccuuccaagcaauagac.....                       | 1 | 0 | seq |
| .....ugccuuccaagcaauagaccug.....                    | 3 | 0 | seq |
| .....ugccuuccaagcaauagaccugggC.....                 | 1 | 1 | seq |
| .....gccuuccaagcaauagaccugggu.....                  | 1 | 0 | seq |
| .....ccuuccaagcaauagacc.....                        | 2 | 0 | seq |
| .....ccuuccaagcaauagaccu.....                       | 1 | 0 | seq |
| .....ccuuccaagcaauagaccug.....                      | 2 | 0 | seq |
| .....ccuuccaagcaauagaccugggC.....                   | 1 | 1 | seq |
| .....ccuuccaagcaauagaccugggu.....                   | 6 | 0 | seq |
| .....cuuccaagcaauagacc.....                         | 2 | 0 | seq |
| .....cuuccaagcaauagaccu.....                        | 1 | 0 | seq |
| .....cuuccaagcaauagaccuggg.....                     | 1 | 0 | seq |
| .....cuuccaagcaauagaccugggu.....                    | 2 | 0 | seq |
| .....uuccaagcaauagaccugggC.....                     | 1 | 1 | seq |
| .....uuccaagcaauagaccugggu.....                     | 3 | 0 | seq |
| .....uuccaagcaaaAgaccugggu.....                     | 1 | 1 | seq |
| .....uccaagcaauagaccugggC.....                      | 1 | 1 | seq |
| .....ccaagcaauagaccugggu.....                       | 2 | 0 | seq |
| .....caagcaauagaccuggg.....                         | 2 | 0 | seq |
| .....caagcaaaAgaccugggu.....                        | 1 | 1 | seq |
| .....caagcaauagaccugggC.....                        | 5 | 1 | seq |
| .....caagcaauagaccugggu.....                        | 7 | 0 | seq |
| .....caagcaauagaccuggguu.....                       | 1 | 0 | seq |
| .....caagcaauagaccuggguuu.....                      | 1 | 0 | seq |
| .....caagcaauagaccuggguuA.....                      | 1 | 1 | seq |

## Mature

## Star

|                                                                                                                      |    |   |     |
|----------------------------------------------------------------------------------------------------------------------|----|---|-----|
| uguuuacugcucacagcgagggcguuuuguaguccaaccgguuagguuauuugccuuccaagcaauagaccuggguuugacucccagcagacgccucucucuaauuuuuuuuuucc |    |   |     |
| .....caagcaauagaccuggguuC.....                                                                                       | 3  | 1 | seq |
| .....aagcaauagaccugggu.....                                                                                          | 10 | 0 | seq |
| .....aagcaauagaccugggu.....                                                                                          | 2  | 0 | seq |
| .....aagcaauagaccuggguuC.....                                                                                        | 7  | 1 | seq |
| .....aagcaauagaccuggguuu.....                                                                                        | 1  | 0 | seq |
| .....agcaauagaccugggu.....                                                                                           | 5  | 0 | seq |
| .....agcaauagaccuggguuC.....                                                                                         | 16 | 1 | seq |
| .....agcaauagaccuggguuu.....                                                                                         | 1  | 0 | seq |
| .....agcaauagaccuggguuCg.....                                                                                        | 7  | 1 | seq |
| .....gcaauagaccuggguuA.....                                                                                          | 1  | 1 | seq |
| .....gcaauagaccuggguuu.....                                                                                          | 1  | 0 | seq |
| .....gcaauagaccuggguuC.....                                                                                          | 52 | 1 | seq |
| .....gcaauagaccuggguuCg.....                                                                                         | 13 | 1 | seq |
| .....caauagaccCggguuug.....                                                                                          | 1  | 1 | seq |
| .....caauagaccuggguuCg.....                                                                                          | 7  | 1 | seq |
| .....auagaccuggguuCgac.....                                                                                          | 1  | 1 | seq |
| .....ugacucccGgcagacgc.....                                                                                          | 1  | 1 | seq |
| .....ugacucccGgcagacgca.....                                                                                         | 3  | 1 | seq |
| .....ugacucccGgcagacgcacc.....                                                                                       | 2  | 1 | seq |
| .....gacgcaccucucucuUu.....                                                                                          | 1  | 1 | seq |

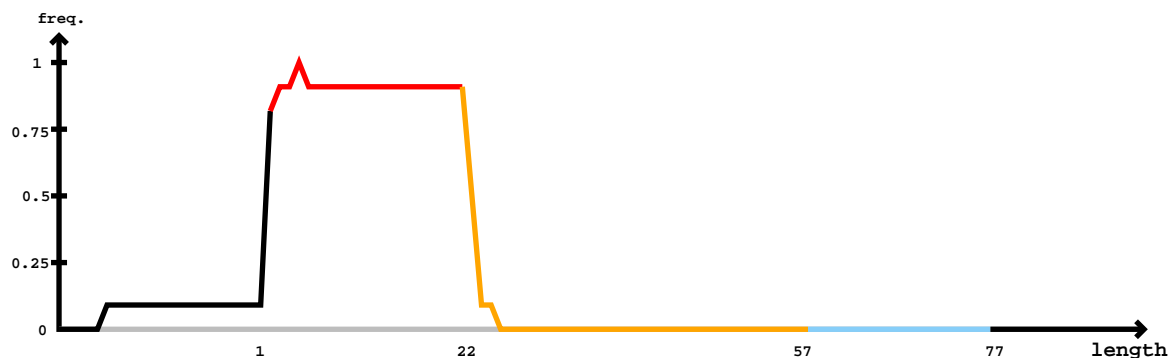

Star



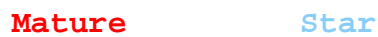[illegible]

Provisional ID : MA\_6479\_4411  
Score total : 0.4  
Score for star read(s) : -1.3  
Score for read counts : 0  
Score for mfe : 0.1  
Score for randfold : 1.6  
Score for cons. seed :  
Total read count : 21  
Mature read count : 21  
Loop read count : 0  
Star read count : 0

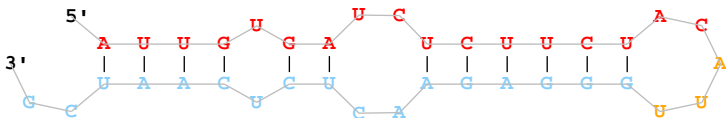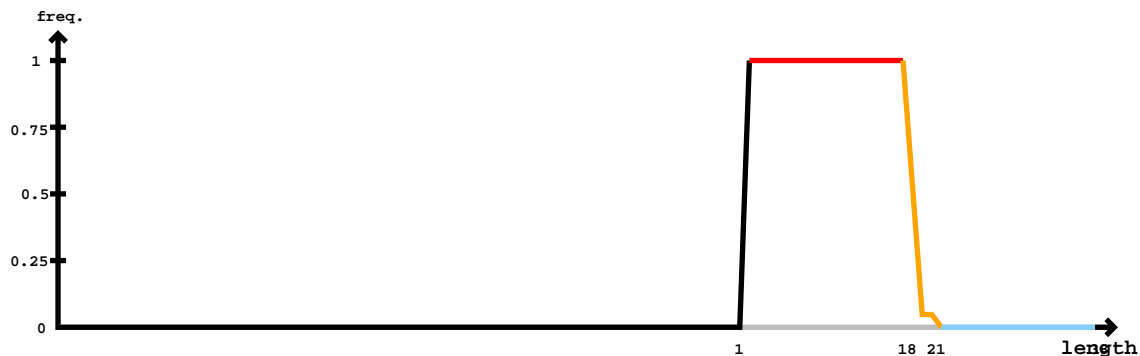

|      | Mature                                                                                       | Star                                    |       |     |        |
|------|----------------------------------------------------------------------------------------------|-----------------------------------------|-------|-----|--------|
| 5' - | gaggaagguagcuaggauuuuacccuagucauuuuauuguccaaccuagguaucccgcaacuucucu                          | auugugaucucucuucacauugggagaacucucaaucgg | -3'   | exp |        |
|      | (((((.....((((.....)))))).(((((((.....)))))))).....)))))).((((.....((((.....)))))).)).)).... |                                         | reads | mm  | sample |
|      | .....auugugaucucucuucuaU.....                                                                |                                         | 2     | 1   | seq    |
|      | .....auugugaucucucuucac.....                                                                 |                                         | 12    | 0   | seq    |
|      | .....auugugaucucucuucacG.....                                                                |                                         | 2     | 1   | seq    |
|      | .....auugugaucucucuucaca.....                                                                |                                         | 4     | 0   | seq    |
|      | .....auugugaucucucuucacUuu.....                                                              |                                         | 1     | 1   | seq    |

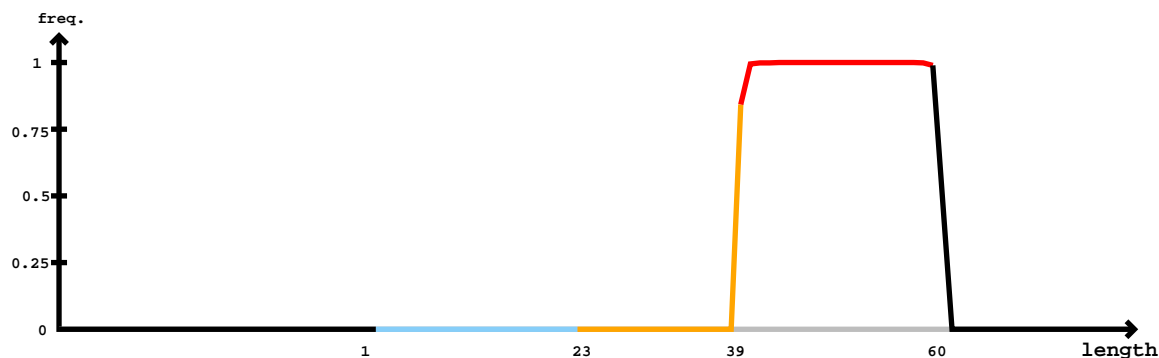

## Mature

| 5'                                                                                                        | acuaaagugagugucuaauuaagucaugaucguuagaucuaaagugaaggugagauuagaucucagccuuugaucacuuuagagauauuggguuuugauugauuugggucaaa | -3' | exp |        |
|-----------------------------------------------------------------------------------------------------------|-------------------------------------------------------------------------------------------------------------------|-----|-----|--------|
| .....((-((((...(((...(((...((((((((((((((((((...)))))).))...))))))))))...))))...))))...))))...))))...)).. | reads                                                                                                             | mm  |     | sample |
| .....Augaucacuuuagagauaug.....                                                                            | 6                                                                                                                 | 1   |     | seq    |
| .....Augaucacuuuagagauauugg.....                                                                          | 610                                                                                                               | 1   |     | seq    |
| .....Nugaucacuuuagagauauugg.....                                                                          | 2                                                                                                                 | 1   |     | seq    |
| .....Gugaucacuuuagagauauugg.....                                                                          | 3                                                                                                                 | 1   |     | seq    |
| .....uugaucacuuuagagauauugg.....                                                                          | 1                                                                                                                 | 0   |     | seq    |
| .....ugaucacuuuagagauau.....                                                                              | 1                                                                                                                 | 0   |     | seq    |
| .....ugaucacuuuagagauaug.....                                                                             | 1                                                                                                                 | 0   |     | seq    |
| .....ugaucacuuuagagGuaugg.....                                                                            | 1                                                                                                                 | 1   |     | seq    |
| .....ugaucacuuuagagauauugg.....                                                                           | 84                                                                                                                | 0   |     | seq    |
| .....ugaucacuuuagUgauauugg.....                                                                           | 1                                                                                                                 | 1   |     | seq    |
| .....ugaucacuuuagagauauugg.....                                                                           | 1                                                                                                                 | 1   |     | seq    |
| .....ugaucacuuuagagauaugA.....                                                                            | 9                                                                                                                 | 1   |     | seq    |
| .....ugaucacuuuagagauaugC.....                                                                            | 1                                                                                                                 | 1   |     | seq    |
| .....ugaucacuuuagagauGugg.....                                                                            | 1                                                                                                                 | 1   |     | seq    |
| .....ugaucacuuuagagauaugU.....                                                                            | 1                                                                                                                 | 1   |     | seq    |
| .....ugaucacuuuagagauauuggU.....                                                                          | 10                                                                                                                | 1   |     | seq    |
| .....ugaucacuuuagagauauuggA.....                                                                          | 1                                                                                                                 | 1   |     | seq    |
| .....gaucacuuuagagauauugg.....                                                                            | 2                                                                                                                 | 0   |     | seq    |
| .....gaucacuuuagagauauuggU.....                                                                           | 1                                                                                                                 | 1   |     | seq    |
| .....ucacuuuagagauaugA.....                                                                               | 1                                                                                                                 | 1   |     | seq    |

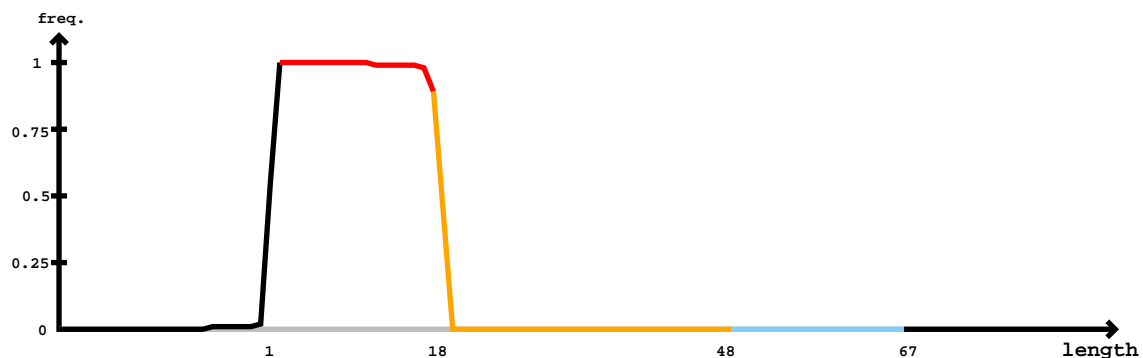

Star

[illegible]

[illegible]

Provisional ID : MA\_681180\_26083  
 Score total : 0.2  
 Score for star read(s) : -1.3  
 Score for read counts : 0  
 Score for mfe : 0  
 Score for randfold : 1.6  
 Score for cons. seed :  
 Total read count : 137  
 Mature read count : 137  
 Loop read count : 0  
 Star read count : 0

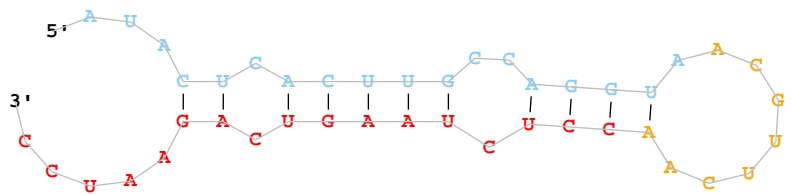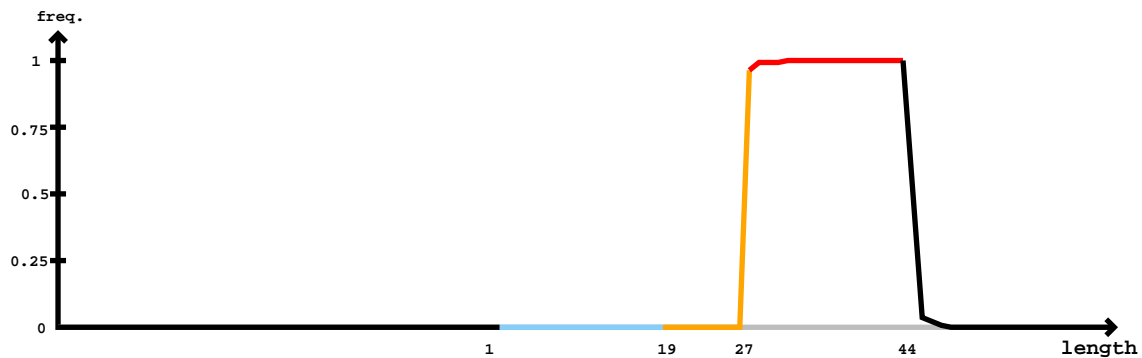

|                                                                                                                         |                     | Star    |        | Mature   |                           |       |     |        |  |
|-------------------------------------------------------------------------------------------------------------------------|---------------------|---------|--------|----------|---------------------------|-------|-----|--------|--|
| 5'                                                                                                                      |                     |         |        |          |                           | -3'   | exp |        |  |
| acaaaaucguaugaggguuugucacacagaccuucagaaaggga                                                                            | uaucucacuuugccaggua | acguuca | ccucua | aagucaga | auccucacucaccauaauaggguca | reads | mm  | sample |  |
| .....(((.((((((((((((((.....)))))))))).((.((.((((((.((((((((((((((((.....)))))))))).)))))).)))).))))).)).....))))).)).. |                     |         |        |          |                           | 1     | 1   | seq    |  |
| .....cUucuaaagucagaaucc.....                                                                                            |                     |         |        |          |                           | 1     | 1   | seq    |  |
| .....ccucuaagucagaaucc.....                                                                                             |                     |         |        |          |                           | 5     | 1   | seq    |  |
| .....ccucuaaagucagaauccA.....                                                                                           |                     |         |        |          |                           | 5     | 1   | seq    |  |
| .....ccucuaaagucagaauccU.....                                                                                           |                     |         |        |          |                           | 1     | 1   | seq    |  |
| .....ccCuaaagucagaaucc.....                                                                                             |                     |         |        |          |                           | 1     | 1   | seq    |  |
| .....ccucuaaagucagGaucc.....                                                                                            |                     |         |        |          |                           | 1     | 1   | seq    |  |
| .....ccucuaaagucagaaucc.....                                                                                            |                     |         |        |          |                           | 97    | 0   | seq    |  |
| .....ccAcuaaagucagaauccu.....                                                                                           |                     |         |        |          |                           | 1     | 1   | seq    |  |
| .....ccucuaaagucagaauccG.....                                                                                           |                     |         |        |          |                           | 11    | 1   | seq    |  |
| .....ccucuaaagucagaauccC.....                                                                                           |                     |         |        |          |                           | 3     | 1   | seq    |  |
| .....ccucuaaagucagaauccu.....                                                                                           |                     |         |        |          |                           | 5     | 0   | seq    |  |
| .....ccucuaaagucagaauccuG.....                                                                                          |                     |         |        |          |                           | 1     | 1   | seq    |  |
| .....cucuaaagucagaauccG.....                                                                                            |                     |         |        |          |                           | 1     | 1   | seq    |  |
| .....cucuaaagucagaauccGc.....                                                                                           |                     |         |        |          |                           | 1     | 1   | seq    |  |
| .....cucuaaagucagaauccG.....                                                                                            |                     |         |        |          |                           | 2     | 1   | seq    |  |
| .....uaagucagaauccucGc.....                                                                                             |                     |         |        |          |                           | 1     | 1   | seq    |  |

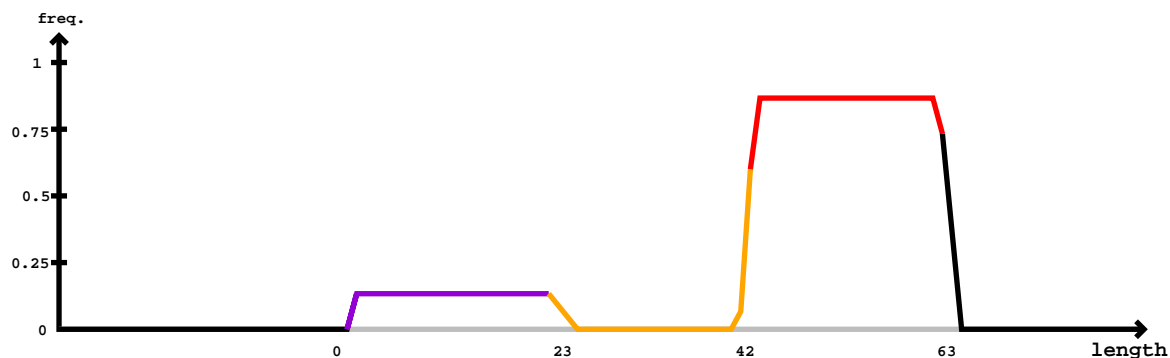

**Mature**

|    |                                                                   |                              |                                                       |       |     |
|----|-------------------------------------------------------------------|------------------------------|-------------------------------------------------------|-------|-----|
| 5' | gcguauauguuuauguuuuagcucucg                                       | cguguagaaguuuacacggaaguuucaa | uaaaccggaaucauuuccuguaagcaucaacgcagggcgaaauauauguuuuc | -3'   | obs |
|    | gcguauauguuuauguuuuagcucucg                                       | cguguagaaguuuacacggaaguuucaa | uaaaccggaaucauuuccuguaagcaucaacgcagggcgaaauauauguuuuc |       | exp |
|    | ((((((((.....((((((((((((((((((((((.....))))))))))))))))))))).... |                              |                                                       | reads | mm  |
|    | .....uugaaguuuacacggaagU.....                                     |                              |                                                       | 1     | 1   |
|    | .....uugaaguuuacacggaagA.....                                     |                              |                                                       | 1     | 1   |
|    | .....cauuuccuguaagcaucaacg.....                                   |                              |                                                       | 1     | 0   |
|    | .....auuuccuguaagcaucaacg.....                                    |                              |                                                       | 1     | 0   |
|    | .....auuuccuguaagcaCcaacgc.....                                   |                              |                                                       | 1     | 1   |
|    | .....auuuccuguaagcaucaacgc.....                                   |                              |                                                       | 6     | 0   |
|    | .....uuuccuguaagcaucaacgc.....                                    |                              |                                                       | 1     | 0   |
|    | .....uuuccuguaagcaucaacgUa.....                                   |                              |                                                       | 1     | 1   |
|    | .....uuuccuguaagcaucaacgca.....                                   |                              |                                                       | 2     | 0   |
|    |                                                                   |                              |                                                       |       | seq |

Provisional ID : MA\_69267\_15123  
 Score total : 0  
 Score for star read(s) : -1.3  
 Score for read counts : 0  
 Score for mfe : -0.2  
 Score for randfold : 1.6  
 Score for cons. seed :  
 Total read count : 87  
 Mature read count : 86  
 Loop read count : 1  
 Star read count : 0

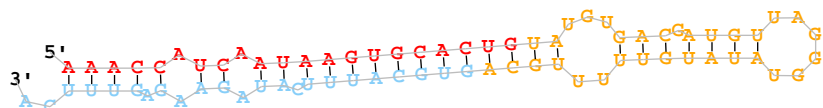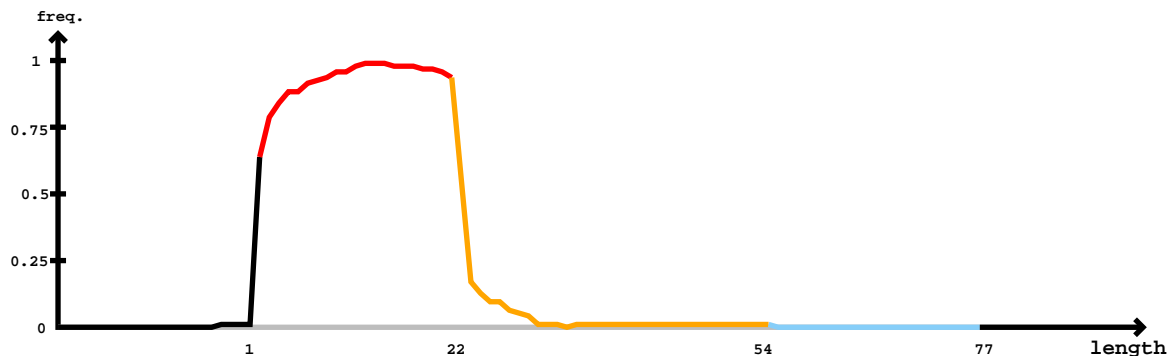

### Mature

### Star

| 5'                                                                                                            |       | 3' | exp |        |
|---------------------------------------------------------------------------------------------------------------|-------|----|-----|--------|
| caacucgcuaccuacagaaaccaucaauaagugcacuguaugugacgauguuaggguauauguuuuugcagugcauuucauagaagaguuucauagcuuccaccagcuc |       |    |     |        |
| .....(((((((.....(((((((.....(((((((.....)))))))).)))))))).)))))).....((((.....))))).                         | reads | mm |     | sample |
| .....acagaaaccauauaag.....                                                                                    | 1     | 0  |     | seq    |
| .....aaaccaucaauaagugc.....                                                                                   | 1     | 0  |     | seq    |
| .....aaaccaucaauaagugcac.....                                                                                 | 1     | 0  |     | seq    |
| .....aaaccaucaauaagugcacu.....                                                                                | 2     | 0  |     | seq    |
| .....aaaccaucaauaagugcacug.....                                                                               | 41    | 0  |     | seq    |
| .....aaaccaucaauaagugcacuA.....                                                                               | 3     | 1  |     | seq    |
| .....aaaccGucauauaagugcacug.....                                                                              | 2     | 1  |     | seq    |
| .....aaaccaucaauaagGgcacug.....                                                                               | 2     | 1  |     | seq    |
| .....aaaUcaucauauaagugcacug.....                                                                              | 1     | 1  |     | seq    |
| .....aaaccaucaauaagGgcacug.....                                                                               | 1     | 1  |     | seq    |
| .....aaaccaucaauUagugcacug.....                                                                               | 1     | 1  |     | seq    |
| .....aaaccaucaauaagugcacCg.....                                                                               | 2     | 1  |     | seq    |
| .....aaaccaucaauaagAgcacug.....                                                                               | 2     | 1  |     | seq    |
| .....aaccucaauaagGgcacugu.....                                                                                | 3     | 1  |     | seq    |
| .....aaccGucauauaagugcacugu.....                                                                              | 1     | 1  |     | seq    |
| .....aaccucaauaagAgcacugu.....                                                                                | 2     | 1  |     | seq    |
| .....aaccucaauaagugcGcugu.....                                                                                | 1     | 1  |     | seq    |
| .....aaccucaauaagGgcacugu.....                                                                                | 3     | 1  |     | seq    |
| .....aaccucaauaagugcacugu.....                                                                                | 4     | 0  |     | seq    |
| .....accaucaauaagugcacugu.....                                                                                | 1     | 0  |     | seq    |
| .....accaucaauaagGgcacugu.....                                                                                | 1     | 1  |     | seq    |
| .....accaucaauaagugcacugua.....                                                                               | 3     | 0  |     | seq    |
| .....ccucaauaagugcacug.....                                                                                   | 1     | 0  |     | seq    |
| .....ccucaauaagugcacugua.....                                                                                 | 3     | 0  |     | seq    |
| .....aucauauaagugcacuguaugC.....                                                                              | 1     | 1  |     | seq    |
| .....aucauauaagugcacuguaugu.....                                                                              | 2     | 0  |     | seq    |
| .....ucaauCagugcacugua.....                                                                                   | 1     | 1  |     | seq    |
| .....cauauaagAgcacuguauguga.....                                                                              | 1     | 1  |     | seq    |
| .....aauaGgugcacuguaugugac.....                                                                               | 1     | 1  |     | seq    |
| .....aauaagugcacuguaugAgac.....                                                                               | 1     | 1  |     | seq    |
| .....uaugugcacuguaCgug.....                                                                                   | 1     | 1  |     | seq    |
| .....uaugugcacuguauguAac.....                                                                                 | 1     | 1  |     | seq    |
| .....aagugcacuguaugugacgaC.....                                                                               | 1     | 1  |     | seq    |
| .....uuGggguauauguuuuugcag.....                                                                               | 1     | 1  |     | seq    |



**Mature**

**Star**

caacucgcuaccuuacagaaaccucaauaagugcacuguaugugacgauguuaggguauguuuuugcagugcauuucauagaagaguuucauagcuuccuccagcuc

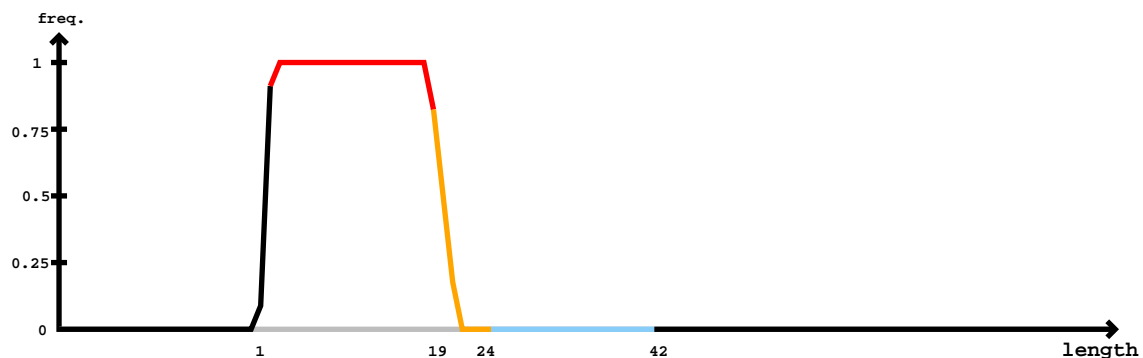

| Mature |                                                                                                                                           | Star  |     |  |  |  |        |
|--------|-------------------------------------------------------------------------------------------------------------------------------------------|-------|-----|--|--|--|--------|
| 5'     | auuuuuuuuagguaggaaaa <u>aggaaguuugguuaacuuaggguuuugcu</u> aaauucuc <u>aa</u> uuuuug <u>u</u> acuacaagaaaaacuaucagacaaugugucaugagacuccuuua | -3'   | exp |  |  |  |        |
|        | ..((((((..(((..((((((..(((((((..(((....)))..)))))).)))))).))))..))))..))))..))))..(((((((....)))..))))..))))..                            | reads | mm  |  |  |  | sample |
|        | .....Uauggaaguuugguuaacu.....                                                                                                             | 2     | 1   |  |  |  | seq    |
|        | .....Uauggaaguuugguuaacuu.....                                                                                                            | 1     | 1   |  |  |  | seq    |
|        | .....auggaaguuugguuaac.....                                                                                                               | 6     | 0   |  |  |  | seq    |
|        | .....auggaaguuugguuaacA.....                                                                                                              | 1     | 1   |  |  |  | seq    |
|        | .....auggaaguuugguuaaGu.....                                                                                                              | 3     | 1   |  |  |  | seq    |
|        | .....auggaaguuugguuaacu.....                                                                                                              | 10    | 0   |  |  |  | seq    |
|        | .....auggaaguuugguuaacuu.....                                                                                                             | 1     | 0   |  |  |  | seq    |
|        | .....Guggaaguuugguuaacuu.....                                                                                                             | 1     | 1   |  |  |  | seq    |
|        | .....auggaaguuugguuaacuuC.....                                                                                                            | 6     | 1   |  |  |  | seq    |
|        | .....uggaaguuugguuaacu.....                                                                                                               | 2     | 0   |  |  |  | seq    |
|        | .....uggaaguuugguuaaGu.....                                                                                                               | 1     | 1   |  |  |  | seq    |

Provisional ID : MA\_7069604\_38372  
Score total : 1  
Score for star read(s) : -1.3  
Score for read counts : 0  
Score for mfe : 0.7  
Score for randfold : 1.6  
Score for cons. seed :  
Total read count : 156  
Mature read count : 156  
Loop read count : 0  
Star read count : 0

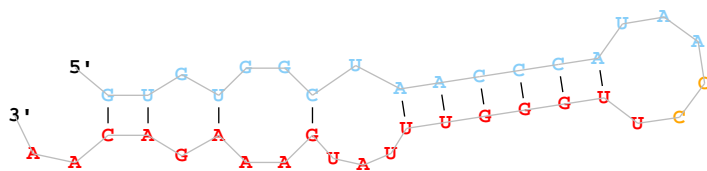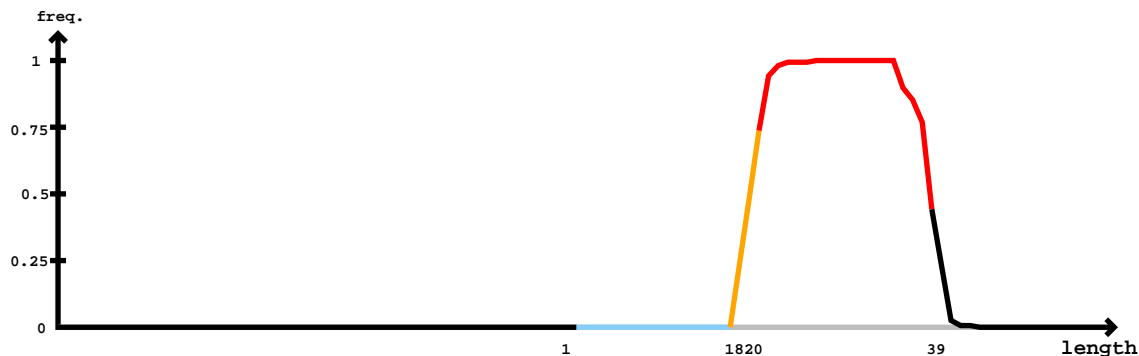

## Star Mature

|    |                                                                                                              |       |     |        |
|----|--------------------------------------------------------------------------------------------------------------|-------|-----|--------|
| 5' | aucauaccaacaugcuugcaauuugugauugcgaugaaaaaaggguuuuuguguggcuaacccaauaacuuggguuuuugaagaagacaaaauaccaaguuggaaaug | -3'   | exp |        |
|    | .....((((((.....(((((((.....)))))).....(((((((.....)))))).....)))).....                                      | reads | mm  | sample |
|    | .....Ucuuggguuuuugaagaag.....                                                                                | 16    | 1   | seq    |
|    | .....Ucuuggguuuuugaagaaga.....                                                                               | 1     | 1   | seq    |
|    | .....ccuugggAuuuuugaagaagac.....                                                                             | 4     | 1   | seq    |
|    | .....Ucuuggguuuuugaagaagac.....                                                                              | 2     | 1   | seq    |
|    | .....ccuugggAuuuuugaagaagaca.....                                                                            | 6     | 1   | seq    |
|    | .....Ucuuggguuuuugaagaagaca.....                                                                             | 5     | 1   | seq    |
|    | .....cuuggguuuuugaagaaga.....                                                                                | 6     | 0   | seq    |
|    | .....cuuggguuuuugaagaagac.....                                                                               | 4     | 0   | seq    |
|    | .....cuuggguuuuugaagaagacG.....                                                                              | 10    | 1   | seq    |
|    | .....cuuggguuuuugaagaagaca.....                                                                              | 1     | 0   | seq    |
|    | .....cuuggguuuuugaagaagacaa.....                                                                             | 1     | 0   | seq    |
|    | .....cuuggguuuuugaagaagacGa.....                                                                             | 14    | 1   | seq    |
|    | .....cuuggguuuuugaagaagacGaa.....                                                                            | 5     | 1   | seq    |
|    | .....cuuggguuuuugaagaagacGaa.....                                                                            | 1     | 1   | seq    |
|    | .....uuggguuuuugaagaagaU.....                                                                                | 1     | 1   | seq    |
|    | .....uuggguuuuugaagaagac.....                                                                                | 2     | 0   | seq    |
|    | .....uuggguuuuugaagaagacG.....                                                                               | 14    | 1   | seq    |
|    | .....uuggguuuuugaagaagaca.....                                                                               | 1     | 0   | seq    |
|    | .....uuggguuuuugaagaagacGa.....                                                                              | 19    | 1   | seq    |
|    | .....uuggguuuuugaagaagacGaa.....                                                                             | 2     | 1   | seq    |
|    | .....uggguuuuugaagaagacG.....                                                                                | 14    | 1   | seq    |
|    | .....uggguuuuugaagaagacGa.....                                                                               | 14    | 1   | seq    |
|    | .....uggguuuuugaagaagacGaa.....                                                                              | 4     | 1   | seq    |
|    | .....ggguuuuugaagaagacGa.....                                                                                | 3     | 1   | seq    |
|    | .....ggguuuuugaagaagacGaa.....                                                                               | 3     | 1   | seq    |
|    | .....ggguuuuugaagaagacGaa.....                                                                               | 1     | 1   | seq    |
|    | .....gAuuuuugaagaagacaaa.....                                                                                | 1     | 1   | seq    |
|    | .....uuuugaagaagacaaaCaa.....                                                                                | 1     | 1   | seq    |

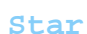

Provisional ID : MA\_717023\_31669  
Score total : 1.2  
Score for star read(s) : -1.3  
Score for read counts : 0  
Score for mfe : 0.9  
Score for randfold : 1.6  
Score for cons. seed :  
Total read count : 20  
Mature read count : 20  
Loop read count : 0  
Star read count : 0

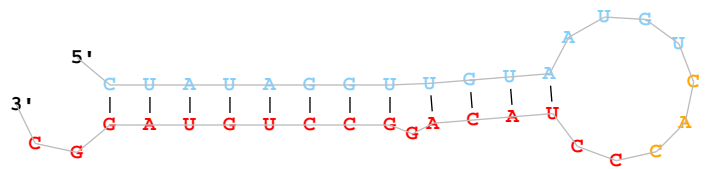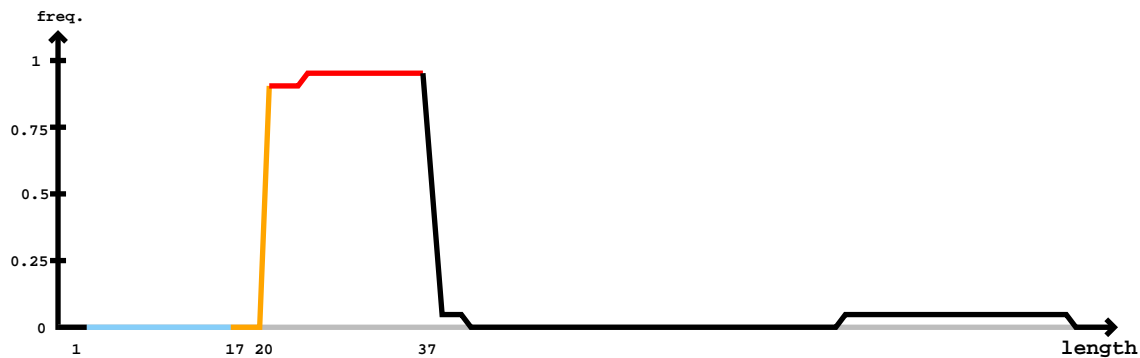

Star Mature

| 5' -                                                                                                                                  | -3'   | exp |        |
|---------------------------------------------------------------------------------------------------------------------------------------|-------|-----|--------|
| ccuauagguuguaa <u>uguc</u> ccuacaggcc <u>uguagg</u> cauccuauagguuguaa <u>uguc</u> aaccuacagcacucucuaaggaugaaaugggcucuugaagauguauggacu | reads | mm  | sample |
| ((((((((((((((.....)))))).)))))))).(((.....((((((((((((((((((((((((((((((((((((((((.....)))))).)))))))).)))))))).                     | 8     | 0   | seq    |
| .....ccuacaggccuguaggc.....                                                                                                           | 1     | 1   | seq    |
| .....ccuaUaggccuguaggc.....                                                                                                           | 1     | 1   | seq    |
| .....ccuacaggccuguaggcC.....                                                                                                          | 7     | 0   | seq    |
| .....ccuacaggccuguaggca.....                                                                                                          | 2     | 1   | seq    |
| .....ccuaUaggccuguaggca.....                                                                                                          | 1     | 1   | seq    |
| .....caggccuguaggcaGcc.....                                                                                                           | 1     | 1   | seq    |
| .....uUaaaugggcucuugaagaugaug....                                                                                                     | 1     | 1   | seq    |

[illegible]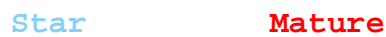[illegible]

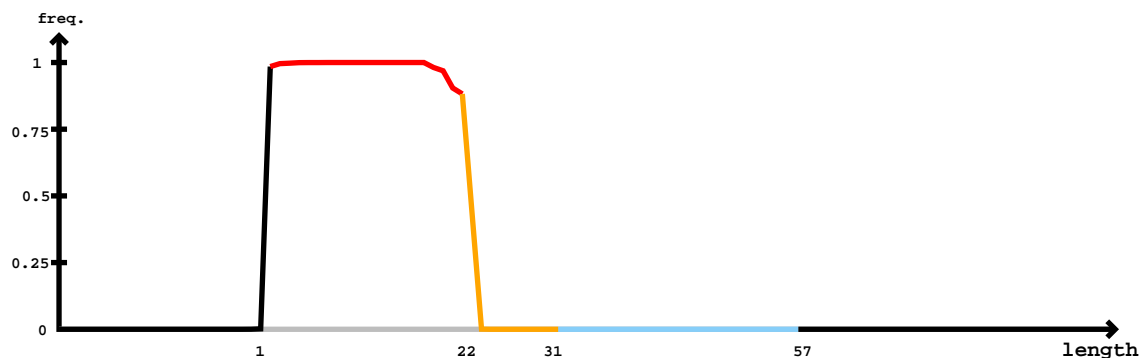

Star

| 5'-                                                                                                        | 3'    | exp |        |
|------------------------------------------------------------------------------------------------------------|-------|-----|--------|
| ggaaauagaagcaugcgcuugugagggcgugguagagagaugaugacaaacuucucuuccuagauacagccucuaacaucugcagaguugcgaccugcagagaugu | reads | mm  | sample |
| .....((((.....)))..((((((((((((((((((.(.....)))))))).....)))))))).....(((((((.(.....)))))))).....          | 1     | 1   | seq    |
| .....Ggugagggcgugguagaga.....                                                                              | 1     | 1   | seq    |
| .....gugagggcgugguuUaga.....                                                                               | 1     | 1   | seq    |
| .....gugagggcgugguagagauga.....                                                                            | 3     | 0   | seq    |
| .....gCgagggcgugguagagagaugau.....                                                                         | 1     | 1   | seq    |
| .....ugagggcgugguagaga.....                                                                                | 19    | 0   | seq    |
| .....ugaggggUgugguagaga.....                                                                               | 1     | 1   | seq    |
| .....uUagggcgugguagaga.....                                                                                | 1     | 1   | seq    |
| .....ugagggcgugguagagG.....                                                                                | 2     | 1   | seq    |
| .....ugagggcgugguuUaga.....                                                                                | 35    | 1   | seq    |
| .....Cgagggcgugguagaga.....                                                                                | 14    | 1   | seq    |
| .....Cgagggcgugguagagau.....                                                                               | 7     | 1   | seq    |
| .....ugagggcgugguagagaA.....                                                                               | 1     | 1   | seq    |
| .....ugagggcgugguuUagau.....                                                                               | 22    | 1   | seq    |
| .....ugagggcgugguagagau.....                                                                               | 13    | 0   | seq    |
| .....ugagggcgugguagagaC.....                                                                               | 1     | 1   | seq    |
| .....ugagggcgugguuUagaug.....                                                                              | 143   | 1   | seq    |
| .....ugagggcgugguagGgaug.....                                                                              | 1     | 1   | seq    |
| .....Ngagggcgugguagagau.....                                                                               | 1     | 1   | seq    |
| .....ugagggcgugAagagau.....                                                                                | 1     | 1   | seq    |
| .....ugagggcgugguagagau.....                                                                               | 60    | 0   | seq    |
| .....Cgagggcgugguagagau.....                                                                               | 24    | 1   | seq    |
| .....ugGggcgugguagagau.....                                                                                | 2     | 1   | seq    |
| .....ugagAagcgugguagagau.....                                                                              | 1     | 1   | seq    |
| .....ugagggcgugguagagauA.....                                                                              | 2     | 1   | seq    |
| .....ugagggcgugguagagauga.....                                                                             | 22    | 0   | seq    |
| .....ugagggcgugguagagauG.....                                                                              | 1     | 1   | seq    |
| .....ugagggcgugguagGgauga.....                                                                             | 1     | 1   | seq    |
| .....ugagggcgugguuUagauga.....                                                                             | 37    | 1   | seq    |
| .....ugaggggGgugguagagauga.....                                                                            | 1     | 1   | seq    |
| .....Cgagggcgugguagagauga.....                                                                             | 11    | 1   | seq    |
| .....ugGggcgugguagagau.....                                                                                | 6     | 1   | seq    |
| .....ugaAagcgugguagagau.....                                                                               | 1     | 1   | seq    |
| .....ugagggcgugguuUagau.....                                                                               | 1933  | 1   | seq    |
| .....ugagggcgugCgagagau.....                                                                               | 2     | 1   | seq    |

## Mature

## Star

ggauagaagcaugcgcuugugagggcgugguagagagauugacaaacucucucuuccuagauacgccccuaacaucugcgagaguugucgacccugcgagagau

|                                  |     |   |     |
|----------------------------------|-----|---|-----|
| .....ugagggcAugguagagagau.....   | 4   | 1 | seq |
| .....ugagggcgugguagGgagau.....   | 2   | 1 | seq |
| .....ugagggcgugguagagGugau.....  | 2   | 1 | seq |
| .....ugUgggcgugguagagagau.....   | 1   | 1 | seq |
| .....ugagggcgugUuagagagau.....   | 3   | 1 | seq |
| .....ugagggcgugguagagauAa.....   | 1   | 1 | seq |
| .....ugagggcgCGguagagagau.....   | 7   | 1 | seq |
| .....ugagggCGguugguagagagau..... | 1   | 1 | seq |
| .....ugagggcgugguagagagCGau..... | 2   | 1 | seq |
| .....ugagggcgugguagagagGGu.....  | 6   | 1 | seq |
| .....ugagggcgugguagagAaugau..... | 3   | 1 | seq |
| .....ugagggcgugguacagagau.....   | 2   | 1 | seq |
| .....Cgagggcgugguagagagau.....   | 363 | 1 | seq |
| .....Ggagggcgugguagagagau.....   | 1   | 1 | seq |
| .....ugagggcgugguagagagau.....   | 965 | 0 | seq |
| .....ugagggcgAGguagagagau.....   | 1   | 1 | seq |
| .....ugagggcgugguGgagagau.....   | 2   | 1 | seq |
| .....ugagggcgugguUgagagau.....   | 1   | 1 | seq |
| .....ugagggcgugguAagagau.....    | 9   | 1 | seq |
| .....ugagggcgugAguagagagau.....  | 1   | 1 | seq |
| .....ugagggcgugguagagagA.....    | 3   | 1 | seq |
| .....ugagggAcgugguagagagau.....  | 1   | 1 | seq |
| .....ugaUggcgugguagagagau.....   | 1   | 1 | seq |
| .....Ngagggcgugguagagagau.....   | 3   | 1 | seq |
| .....ugagggUgugguagagagau.....   | 2   | 1 | seq |
| .....ugagggcgugAagagagau.....    | 2   | 1 | seq |
| .....ugagggcguggCagagagau.....   | 3   | 1 | seq |
| .....ugagggcgugguagagagAG.....   | 11  | 1 | seq |
| .....ugagggcgugguagagagAGC.....  | 119 | 1 | seq |
| .....Cgagggcgugguagagagauu.....  | 3   | 1 | seq |
| .....ugagggcgugguagagagauG.....  | 1   | 1 | seq |
| .....ugagggcgugguagagagauu.....  | 11  | 0 | seq |
| .....ugagggcgugguagGgagauu.....  | 1   | 1 | seq |
| .....ugagggcgugUguagagagauu..... | 12  | 1 | seq |
| .....ugagggcgugguagagagauC.....  | 4   | 1 | seq |
| .....ugagggcgugguagagagauA.....  | 4   | 1 | seq |
| .....ugagggcgugguAagagauu.....   | 8   | 1 | seq |
| .....ugagggcgugguagagagauuU..... | 1   | 1 | seq |
| .....gagggcgugguagagau.....      | 6   | 0 | seq |
| .....gagggcgugguAagagug.....     | 4   | 1 | seq |
| .....gagggcgugguGgagagug.....    | 1   | 1 | seq |
| .....gagggcgugguagagagug.....    | 17  | 0 | seq |
| .....gagggcgugguacagagug.....    | 1   | 1 | seq |
| .....gagggcgugguAagauga.....     | 3   | 1 | seq |
| .....gagggcgugguagagauga.....    | 3   | 0 | seq |
| .....gagggcgugguagagagau.....    | 4   | 0 | seq |
| .....gagggcgugguAagagau.....     | 3   | 1 | seq |
| .....Uagggcgugguagagagau.....    | 1   | 1 | seq |
| .....gagggcgugguagagagauC.....   | 1   | 1 | seq |
| .....agggcgugguagagauga.....     | 1   | 0 | seq |
| .....agggcgugguAagauga.....      | 1   | 1 | seq |
| .....agggcgugguGgagauga.....     | 1   | 1 | seq |
| .....agggcgugCguagagagau.....    | 1   | 1 | seq |
| .....agggcgugguAagagau.....      | 1   | 1 | seq |
| .....agggcgugguagagagau.....     | 1   | 0 | seq |
| .....agggcgugguagagagauC.....    | 1   | 1 | seq |
| .....gggcCugguagagauga.....      | 1   | 1 | seq |
| .....gggcgugguagagauga.....      | 3   | 0 | seq |
| .....gggcgugguagagagau.....      | 3   | 0 | seq |
| .....gggcgugguagagagauC.....     | 1   | 1 | seq |
| .....ggcgugguagagagau.....       | 1   | 0 | seq |
| .....cgugguGgagagauug.....       | 1   | 1 | seq |



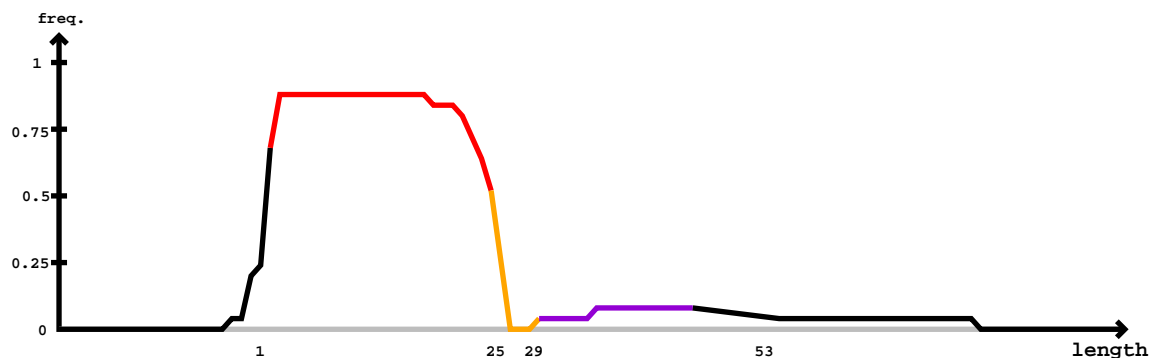

| 5'                                                                                                     |       | -3' | obs    |  |
|--------------------------------------------------------------------------------------------------------|-------|-----|--------|--|
|                                                                                                        |       |     | exp    |  |
| ccuucugcaacauacuugaguuuguagagccauuuggaagucaccauugacuucccucaggucuaaggaacaauucccaaacauuucuaugauggaacugua |       |     |        |  |
| ccuucugcaacauacuugaguuuguagagccauuuggaagucaccauugacuucccucaggucuaaggaaca                               |       |     |        |  |
| .....((((.....((((.....((((.....)))))).....)))))).....((((.....)))).....))))..                         | reads | mm  | sample |  |
| .....ugaUuuuguagagccauuuggaag.....                                                                     | 1     | 1   | seq    |  |
| .....aUuuuguagagccauuuggaaguc.....                                                                     | 2     | 1   | seq    |  |
| .....aUuuuguagagccauuuggaagucacc.....                                                                  | 2     | 1   | seq    |  |
| .....Uuuuguagagccauuugg.....                                                                           | 1     | 1   | seq    |  |
| .....uuuguagagccauuuggaagu.....                                                                        | 1     | 0   | seq    |  |
| .....uuuguagagccauuuggaaguc.....                                                                       | 1     | 0   | seq    |  |
| .....uuuguagagccauuuggaagucac.....                                                                     | 7     | 0   | seq    |  |
| .....uuuguagagccauCuggaagucac.....                                                                     | 1     | 1   | seq    |  |
| .....uuuguagagccauuuggaGgucac.....                                                                     | 1     | 1   | seq    |  |
| .....uuguagagccauuuggaagC.....                                                                         | 1     | 1   | seq    |  |
| .....uuguagagccauuuggaaguc.....                                                                        | 1     | 1   | seq    |  |
| .....uuguagagccauuuggaagucac.....                                                                      | 1     | 1   | seq    |  |
| .....uuguagagccauuuggaagucacc.....                                                                     | 1     | 0   | seq    |  |
| .....gacuucccucaggucu.....                                                                             | 1     | 0   | seq    |  |
| .....cccucaggucuUggaaca.....                                                                           | 1     | 1   | seq    |  |
| .....cauuccccaCacaucauucua.....                                                                        | 1     | 1   | seq    |  |

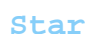[illegible]

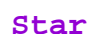

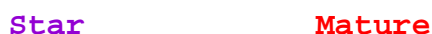[illegible]

## Star

## Mature

agagaacacacuugugggcgugggagaaggguccuugaauuaccugcuccagacagguugcaguuuauaggucggcgagacggguuguugagaaacauacacagagcgag

|                                |     |   |     |
|--------------------------------|-----|---|-----|
| .....ucggcgagGcggguugu.....    | 29  | 1 | seq |
| .....ucggcgagacggguugC.....    | 2   | 1 | seq |
| .....ucggcgagCcgguugu.....     | 98  | 1 | seq |
| .....ucggcgagCcgguugu.....     | 101 | 1 | seq |
| .....ucggcgagacggguugu.....    | 33  | 0 | seq |
| .....ucggcgagCcgguugu.....     | 49  | 1 | seq |
| .....ucggcgagacggguugC.....    | 1   | 1 | seq |
| .....ucggcgagacggguuguU.....   | 10  | 1 | seq |
| .....ucggcgagUcggguuguug.....  | 163 | 1 | seq |
| .....ucggcgagacggguuguC.....   | 1   | 1 | seq |
| .....ucggcgagUcggguuguuga..... | 2   | 1 | seq |
| .....cggcgagCcgguugu.....      | 87  | 1 | seq |
| .....cggcgagacggguugC.....     | 3   | 1 | seq |
| .....cggcgagacggguugu.....     | 1   | 1 | seq |
| .....cggcgagacggguugu.....     | 14  | 0 | seq |
| .....cggcgagCcgguugu.....      | 11  | 1 | seq |
| .....cggcgagacggguuguA.....    | 1   | 1 | seq |
| .....cggcgagacggguuguU.....    | 2   | 1 | seq |
| .....cggcgagUcggguuguug.....   | 120 | 1 | seq |
| .....cggcgagCcgguuguug.....    | 1   | 1 | seq |
| .....cggcgagUcggguuguuga.....  | 3   | 1 | seq |
| .....cggcgagacggguuguUa.....   | 1   | 1 | seq |
| .....ggcgagUcggguuguug.....    | 26  | 1 | seq |
| .....ggcgagacggguuguU.....     | 1   | 1 | seq |
| .....gcbgagUcggguuguuga.....   | 1   | 1 | seq |

## Mature

[illegible]

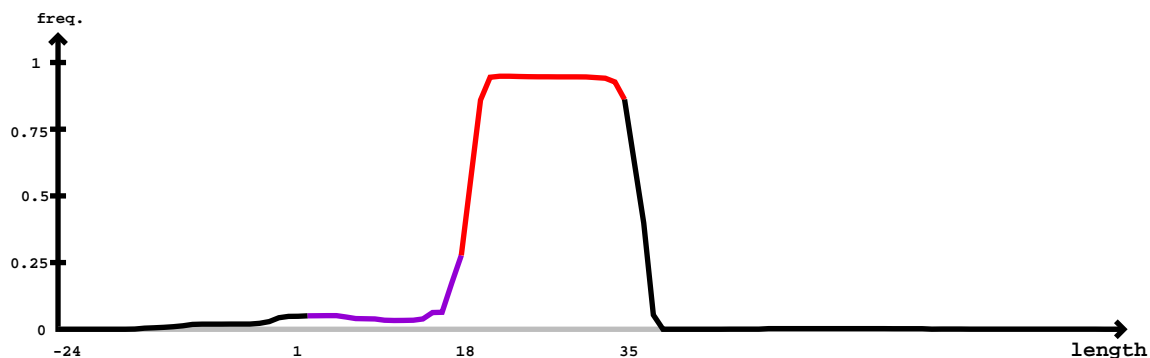[illegible]

Star      Mature

[illegible]



# Star Mature

|                                                             |     |   |     |
|-------------------------------------------------------------|-----|---|-----|
| aacuuuuuuuuacuuuuuuugugggggcgagauggggcauugccccuguuuuuggccuu | 1   | 1 | seq |
| .....uGgccccuguuuuuggccu.....                               | 9   | 1 | seq |
| .....uugccccuguuuuuggccC.....                               | 66  | 0 | seq |
| .....uugccccuguuuuuggccu.....                               | 72  | 0 | seq |
| .....uugccccuguuuuuggccuA.....                              | 1   | 1 | seq |
| .....uugccccuguuuCuuggccuu.....                             | 1   | 1 | seq |
| .....uugccccuguuuuuggccuG.....                              | 2   | 1 | seq |
| .....uugUccccuguuuuuggccuu.....                             | 1   | 1 | seq |
| .....uugccccuguuuuuggccCu.....                              | 1   | 1 | seq |
| .....uugccccuguuuuuggccuuG.....                             | 2   | 1 | seq |
| .....uugcccUuguuuuuggccuuA.....                             | 1   | 1 | seq |
| .....uugccccuguuuuuggccuCa.....                             | 2   | 1 | seq |
| .....uugccccuguuuuuggccuuU.....                             | 1   | 1 | seq |
| .....uugccccuguuCuuggccuuA.....                             | 1   | 1 | seq |
| .....uugccccuguuuuuggUccuuA.....                            | 1   | 1 | seq |
| .....uuCccccuguuuuuggccuuA.....                             | 1   | 1 | seq |
| .....uugccccuguuuuuggccuuA.....                             | 82  | 0 | seq |
| .....uugccccuguuuuuggccuuAA.....                            | 8   | 0 | seq |
| .....ugccccuguuuuuggcA.....                                 | 7   | 1 | seq |
| .....ugccccuguuuuuggcG.....                                 | 1   | 1 | seq |
| .....ugccccuguuuuuggcU.....                                 | 14  | 1 | seq |
| .....ugccccuguuuuuggcc.....                                 | 38  | 0 | seq |
| .....ugccccuguuuuuggccC.....                                | 10  | 1 | seq |
| .....ugccccuguuuuuggUcu.....                                | 1   | 1 | seq |
| .....Agccccuguuuuuggccu.....                                | 2   | 1 | seq |
| .....Ggccccuguuuuuggccu.....                                | 1   | 1 | seq |
| .....ugccccuguuuuuggccu.....                                | 82  | 0 | seq |
| .....ugccccuguuuuuggccG.....                                | 5   | 1 | seq |
| .....ugccccuguuuuuggccuu.....                               | 73  | 0 | seq |
| .....ugccccuguuuuAggccuu.....                               | 1   | 1 | seq |
| .....ugccccuguuuuuggUcuu.....                               | 1   | 1 | seq |
| .....ugcccUuguuuuuggccuu.....                               | 1   | 1 | seq |
| .....ugccccugCuuuuggccuu.....                               | 1   | 1 | seq |
| .....ugUccccuguuuuuggccuu.....                              | 1   | 1 | seq |
| .....ugccccuguuuuuggccuA.....                               | 2   | 1 | seq |
| .....ugccccugGuuuuggccuu.....                               | 1   | 1 | seq |
| .....ugccccuguuuuuggccuuA.....                              | 52  | 0 | seq |
| .....ugccccuguuuuuggccuuU.....                              | 1   | 1 | seq |
| .....ugccccuguuuuuggccuCa.....                              | 1   | 1 | seq |
| .....ugccccuguuuuuggccuuAA.....                             | 11  | 0 | seq |
| .....ugccccCguuuuuggccuuAA.....                             | 1   | 1 | seq |
| .....ugccccuguuuuuggccuuAG.....                             | 1   | 1 | seq |
| .....gccccuguuuuuggGcu.....                                 | 1   | 1 | seq |
| .....gccccuguuuuuggcUu.....                                 | 1   | 1 | seq |
| .....Accccuguuuuuggccu.....                                 | 1   | 1 | seq |
| .....gccccuguuuuuggUcu.....                                 | 1   | 1 | seq |
| .....gccccCguuuuuggccu.....                                 | 1   | 1 | seq |
| .....gccccugCuuuuggccu.....                                 | 1   | 1 | seq |
| .....gccccuguuuuugggAcu.....                                | 1   | 1 | seq |
| .....gccccuguuuuuggccu.....                                 | 330 | 0 | seq |
| .....gccccuguuuuuggccC.....                                 | 47  | 1 | seq |
| .....gccccuguuuuCggccu.....                                 | 1   | 1 | seq |
| .....Nccccuguuuuuggccu.....                                 | 2   | 1 | seq |
| .....gccccuguuuuuggccG.....                                 | 18  | 1 | seq |
| .....gUccccuguuuuuggccu.....                                | 1   | 1 | seq |
| .....gccccuguuuAuggccuu.....                                | 1   | 1 | seq |
| .....gccccuguuuuuggccuA.....                                | 6   | 1 | seq |
| .....gccccuguuAuuuggccuu.....                               | 1   | 1 | seq |
| .....gccccuguuuuuggccuu.....                                | 239 | 0 | seq |
| .....gccccuguuuuuggccCu.....                                | 1   | 1 | seq |
| .....gccccuguuCuuggccuu.....                                | 1   | 1 | seq |
| .....gcUccuguuuuuggccuu.....                                | 1   | 1 | seq |
| .....gccccugGuuuuggccuuA.....                               | 1   | 1 | seq |
| .....gccccCguuuuuggccuuA.....                               | 4   | 1 | seq |
| .....gccccuguuuuuggccCuA.....                               | 1   | 1 | seq |
| .....gccccuguuuuuggccuuG.....                               | 3   | 1 | seq |
| .....gccccuguuuuuggccuuA.....                               | 282 | 0 | seq |
| .....gccccugGuuuuggccuuA.....                               | 1   | 1 | seq |
| .....gGccccuguuuuuggccuuA.....                              | 2   | 1 | seq |
| .....NccccuguuuuuggccuuA.....                               | 1   | 1 | seq |

Star      Mature

[illegible]

Provisional ID : MA\_75539\_20810  
 Score total : 2.5  
 Score for star read(s) : -1.3  
 Score for read counts : 0  
 Score for mfe : 2.2  
 Score for randfold : 1.6  
 Score for cons. seed :  
 Total read count : 340  
 Mature read count : 340  
 Loop read count : 0  
 Star read count : 0

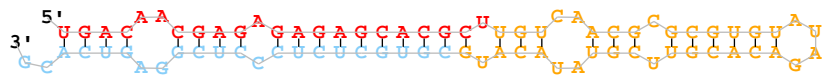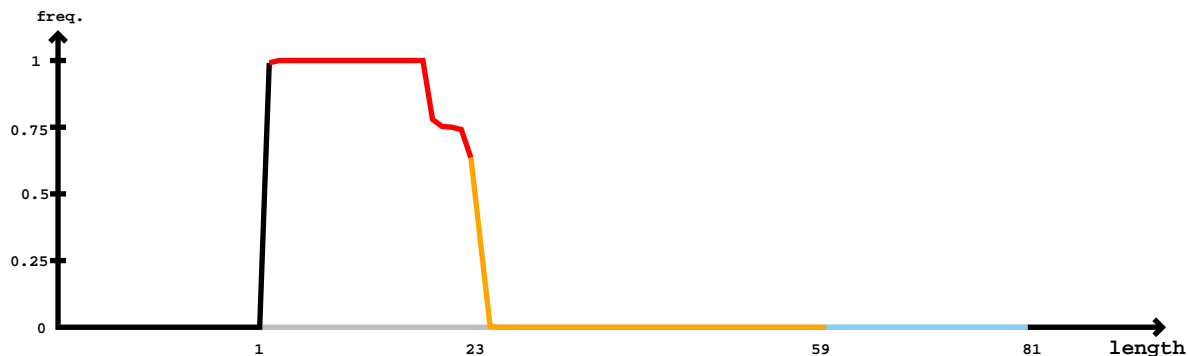

### Mature

### Star

| 5'    | uauauugaccaaagguuagaugacaacgagagagagcagcgcuugucaacgagcguguaugacacguucguaauacaugcgugcucucccccgagucacgcaauuucuaauca | -3'    | exp |  |
|-------|-------------------------------------------------------------------------------------------------------------------|--------|-----|--|
| reads | mm                                                                                                                | sample |     |  |
| 1     | 1                                                                                                                 | seq    |     |  |
| 1     | 1                                                                                                                 | seq    |     |  |
| 1     | 1                                                                                                                 | seq    |     |  |
| 6     | 1                                                                                                                 | seq    |     |  |
| 56    | 0                                                                                                                 | seq    |     |  |
| 10    | 1                                                                                                                 | seq    |     |  |
| 7     | 0                                                                                                                 | seq    |     |  |
| 1     | 1                                                                                                                 | seq    |     |  |
| 1     | 1                                                                                                                 | seq    |     |  |
| 1     | 0                                                                                                                 | seq    |     |  |
| 1     | 1                                                                                                                 | seq    |     |  |
| 32    | 1                                                                                                                 | seq    |     |  |
| 3     | 0                                                                                                                 | seq    |     |  |
| 1     | 1                                                                                                                 | seq    |     |  |
| 3     | 1                                                                                                                 | seq    |     |  |
| 2     | 1                                                                                                                 | seq    |     |  |
| 1     | 1                                                                                                                 | seq    |     |  |
| 1     | 1                                                                                                                 | seq    |     |  |
| 1     | 1                                                                                                                 | seq    |     |  |
| 180   | 0                                                                                                                 | seq    |     |  |
| 8     | 1                                                                                                                 | seq    |     |  |
| 5     | 1                                                                                                                 | seq    |     |  |
| 2     | 1                                                                                                                 | seq    |     |  |
| 1     | 1                                                                                                                 | seq    |     |  |
| 1     | 1                                                                                                                 | seq    |     |  |
| 1     | 1                                                                                                                 | seq    |     |  |
| 1     | 1                                                                                                                 | seq    |     |  |
| 7     | 0                                                                                                                 | seq    |     |  |
| 1     | 1                                                                                                                 | seq    |     |  |
| 1     | 0                                                                                                                 | seq    |     |  |
| 1     | 0                                                                                                                 | seq    |     |  |
| 1     | 0                                                                                                                 | seq    |     |  |



| 5'                                                                                                                   | obs | exp | reads | mm | sample |
|----------------------------------------------------------------------------------------------------------------------|-----|-----|-------|----|--------|
| uggaagucuuagaggauugggaggauaggagaaggcuguuugcuaauuauucaguuagaacccugauuagucuuucccauucccccauucccauugccuccaucacacauccc    | -3' |     |       |    |        |
| uggaagucuuagaggauugggaggauaggagaaggcuguuugcuaauuauucaguuagaacccugauuagucuuucccauucccccauucccauugccuccaucacacauccc    |     |     |       |    |        |
| (((((.(.(...(((.(.((((((((((((.(((((((.(.....((((((.....)))))))))))))))))))))))))))))))))))))))))))))))))))))))))))) |     |     |       |    |        |
| .....ggTuugggaggauaggaga.....                                                                                        |     |     | 1     | 1  | seq    |
| .....ggTuugggaggauaggagaa.....                                                                                       |     |     | 2     | 1  | seq    |
| .....ggTuugggaggauaggagaaggg.....                                                                                    |     |     | 11    | 1  | seq    |
| .....ggTuugggaggauaggagaagggc.....                                                                                   |     |     | 7     | 1  | seq    |
| .....ggTuugggaggauaggagaagggcu.....                                                                                  |     |     | 4     | 1  | seq    |
| .....ggTuugggaggauaggagaagggcug.....                                                                                 |     |     | 1     | 1  | seq    |
| .....gTuugggaggauaggagaagggcug.....                                                                                  |     |     | 1     | 1  | seq    |
| .....Tuugggaggauaggagaagggcu.....                                                                                    |     |     | 1     | 1  | seq    |
| .....uugggaggauaggagaagggcu.....                                                                                     |     |     | 1     | 0  | seq    |
| .....uugggaggauaggagaagggcuA.....                                                                                    |     |     | 1     | 1  | seq    |
| .....uugggaggauaggagaagggcu.....                                                                                     |     |     | 1     | 0  | seq    |
| .....uugggaggauaggagaagggcug.....                                                                                    |     |     | 1     | 0  | seq    |
| .....uugggaggauaggagaagggcuA.....                                                                                    |     |     | 1     | 1  | seq    |
| .....uugggaggauaggagaagggcugAuu.....                                                                                 |     |     | 1     | 1  | seq    |
| .....gggaggauaggagaagggcu.....                                                                                       |     |     | 2     | 0  | seq    |
| .....gggaggauaggagaagggcug.....                                                                                      |     |     | 1     | 0  | seq    |
| .....gggaggauaggagaagggcugAu.....                                                                                    |     |     | 1     | 1  | seq    |
| .....gaggauaggagaagggcu.....                                                                                         |     |     | 1     | 0  | seq    |
| .....gaggauaggagaagggcug.....                                                                                        |     |     | 1     | 0  | seq    |
| .....gaggauaggagaagggcugAu.....                                                                                      |     |     | 1     | 1  | seq    |
| .....gaggauaggagaagggcugAuu.....                                                                                     |     |     | 4     | 1  | seq    |
| .....gaggauaggagaagggcugAuug.....                                                                                    |     |     | 1     | 1  | seq    |
| .....gaggauaggagaagggcugAuugc.....                                                                                   |     |     | 1     | 1  | seq    |
| .....aggauaggagaagggcug.....                                                                                         |     |     | 1     | 0  | seq    |
| .....aggauaggagaagggcugAu.....                                                                                       |     |     | 1     | 1  | seq    |
| .....aggauaggagaagggcugAuu.....                                                                                      |     |     | 1     | 1  | seq    |
| .....aggauaggagaagggcugAuugc.....                                                                                    |     |     | 1     | 1  | seq    |
| .....uaggagaagggcugAuug.....                                                                                         |     |     | 1     | 1  | seq    |
| .....uaggagaagAguuuug.....                                                                                           |     |     | 1     | 1  | seq    |
| .....uCagucuuucccauuccucc.....                                                                                       |     |     | 1     | 1  | seq    |
| .....Cagucuuucccauuccucc.....                                                                                        |     |     | 1     | 1  | seq    |
| .....agucuuucccauuccucccauucccau.....                                                                                |     |     | 1     | 1  | seq    |
| .....ucuuucccauucccccauucc.....                                                                                      |     |     | 1     | 1  | seq    |

## Star

## Mature

uggaagucuuagaggauugggaggaaggagaaggcuguuugcuuaauuauucaguuugaaccugauuagucuuucccuauuccucccauuccuaauugccuccaucacacauccc

|                                     |     |   |     |
|-------------------------------------|-----|---|-----|
| .....ucuuucccuauuccucccauucc.....   | 1   | 1 | seq |
| .....ucuuucccuauuccucccauucc.....   | 1   | 0 | seq |
| .....ucuuucccuauuccucccauucca.....  | 1   | 0 | seq |
| .....ucuuucccuauuccucccauuccuU..... | 2   | 1 | seq |
| .....cuucccuauuccuccca.....         | 1   | 0 | seq |
| .....cuucccuauuccucccauucca.....    | 2   | 0 | seq |
| .....uucccuauuccucccaC.....         | 2   | 1 | seq |
| .....uucccuauuccucccau.....         | 1   | 0 | seq |
| .....uucccuauuccucccauu.....        | 10  | 0 | seq |
| .....uucccuauucUucccauu.....        | 1   | 1 | seq |
| .....Cucccuauuccucccauuc.....       | 1   | 1 | seq |
| .....uucccuauuccucccauucc.....      | 1   | 0 | seq |
| .....uucccuauuccucccauuccU.....     | 2   | 1 | seq |
| .....uucccuauuccucccauucc.....      | 5   | 0 | seq |
| .....uucccuauuccucccauuccG.....     | 2   | 1 | seq |
| .....uucccuauuccucccauuccA.....     | 1   | 1 | seq |
| .....uucccuGuuccucccauuccu.....     | 1   | 1 | seq |
| .....uucccuauuccucccauuccu.....     | 30  | 0 | seq |
| .....uucccuauuccucccauuccuU.....    | 1   | 1 | seq |
| .....uucccuauuccucccauuccuG.....    | 3   | 1 | seq |
| .....uucccuauCccucccauuccua.....    | 1   | 1 | seq |
| .....Cucccuauuccucccauuccua.....    | 1   | 1 | seq |
| .....uucccuauuccucccGuuccua.....    | 1   | 1 | seq |
| .....uucccuauGccucccauuccua.....    | 1   | 1 | seq |
| .....uucccCauuccucccauuccua.....    | 1   | 1 | seq |
| .....uucccuauuccucccauCccua.....    | 1   | 1 | seq |
| .....uucccuauuccucccauuccua.....    | 162 | 0 | seq |
| .....uucccuauuccucccauuccuaC.....   | 1   | 1 | seq |
| .....cccuauuccucccauuc.....         | 1   | 0 | seq |
| .....ccuauuccucccauucc.....         | 1   | 0 | seq |
| .....ucccauuccuauugccuccaC.....     | 1   | 1 | seq |

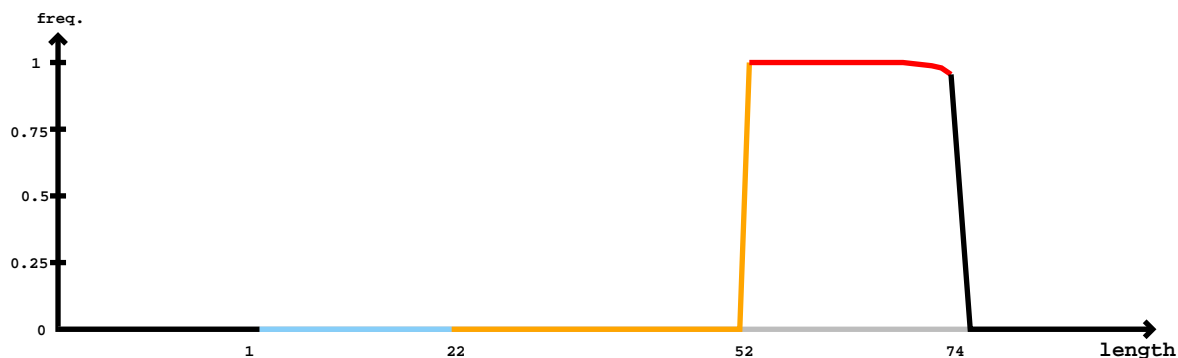

## Mature

[illegible]

[illegible]

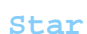



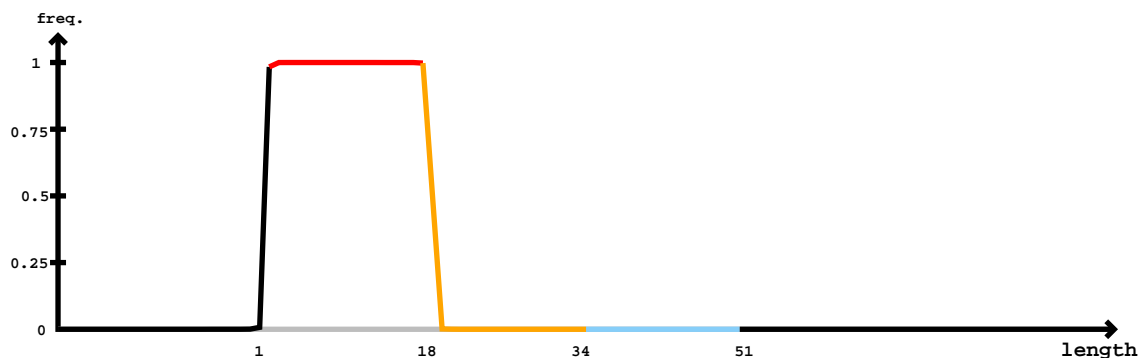

Star

| 5'-                                                                                                           | -3'   | exp |        |
|---------------------------------------------------------------------------------------------------------------|-------|-----|--------|
| ..cagaauuuucaauugagaagaggaaaggaagagucgucaaugcuuuucacugaugaaaaacauccuccuacucuuugucugaccuugguacauagauauccuuauau | reads | mm  | sample |
| .....(((((((((((..((((((.....)))))))).)..)))))))).-(((((((((((..)))..)))))))).                                | 1     | 1   | seq    |
| .....uugagaagaggagaagAag.....                                                                                 | 1     | 1   | seq    |
| .....gaAaagaggagaaggagaa.....                                                                                 | 1     | 1   | seq    |
| .....aUugaggagaaggagaagucgu.....                                                                              | 1     | 1   | seq    |
| .....Gugaggagaaggagaagucgu.....                                                                               | 1     | 1   | seq    |
| .....auCaggagaaggagaagucgu.....                                                                               | 1     | 1   | seq    |
| .....Uugaggagaaggagaagucgu.....                                                                               | 8     | 1   | seq    |
| .....ugaggagaaggagaagucA.....                                                                                 | 1     | 1   | seq    |
| .....ugaggaaaggUgaagucg.....                                                                                  | 1     | 1   | seq    |
| .....uUaggagaaggagaagucg.....                                                                                 | 4     | 1   | seq    |
| .....Cgaggagaaggagaagucg.....                                                                                 | 12    | 1   | seq    |
| .....uCaggagaaggagaagucg.....                                                                                 | 2     | 1   | seq    |
| .....ugaggagaaggagaagucg.....                                                                                 | 13    | 0   | seq    |
| .....Ngaggagaaggagaagucg.....                                                                                 | 19    | 1   | seq    |
| .....ugaggagaaggagaagucgC.....                                                                                | 1     | 1   | seq    |
| .....uUaggagaaggagaagucgu.....                                                                                | 4     | 1   | seq    |
| .....Ngaggagaaggagaagucgu.....                                                                                | 16    | 1   | seq    |
| .....Cgaggagaaggagaagucgu.....                                                                                | 12    | 1   | seq    |
| .....ugaggagaaggagaagucgu.....                                                                                | 14    | 0   | seq    |
| .....Ggaggagaaggagaagucgu.....                                                                                | 40    | 1   | seq    |
| .....ugaggagaaggagaagucguA.....                                                                               | 11    | 1   | seq    |
| .....Agaggagaaggagaagucguc.....                                                                               | 9     | 1   | seq    |
| .....ugaggagaaggagaagucguG.....                                                                               | 1     | 1   | seq    |
| .....ugaggagaaggagaagucguAa.....                                                                              | 1     | 1   | seq    |
| .....Aaggagaaggagaagucgu.....                                                                                 | 31    | 1   | seq    |
| .....gaggauGgaggagaagucgu.....                                                                                | 13    | 1   | seq    |
| .....Caggagaaggagaagucgu.....                                                                                 | 10    | 1   | seq    |
| .....gaggaaagAagaagucgu.....                                                                                  | 10    | 1   | seq    |
| .....gaggagaaggagaagucgG.....                                                                                 | 689   | 1   | seq    |
| .....gaggGaggagaagucgu.....                                                                                   | 68    | 1   | seq    |
| .....gCggaaggagaagucgu.....                                                                                   | 5     | 1   | seq    |
| .....gaggagaaggagaagucCu.....                                                                                 | 17    | 1   | seq    |
| .....Naggagaaggagaagucgu.....                                                                                 | 33    | 1   | seq    |
| .....gaggaaaggGgaagucgu.....                                                                                  | 83    | 1   | seq    |
| .....gaggaaaggUgaagucgu.....                                                                                  | 11    | 1   | seq    |

## Mature

## Star

cagaauuuucaaauugagaau**gaggaaggagagaagucgu**caau**gcuuuacacugau**gaaaacau**cuuccu**caucucuuugucugacccuugguacauagaua**uccuuauau**

|                                  |       |   |     |
|----------------------------------|-------|---|-----|
| .....gaggaGggagaagucgu.....      | 95    | 1 | seq |
| .....gagUaaggagaagucgu.....      | 5     | 1 | seq |
| .....gaggaaggagagaUgucgu.....    | 13    | 1 | seq |
| .....gaggaCggagaagucgu.....      | 6     | 1 | seq |
| .....gGggaaggagaagucgu.....      | 82    | 1 | seq |
| .....gaggaaggagUagucgu.....      | 19    | 1 | seq |
| .....gaggaaggagaaCucgu.....      | 1     | 1 | seq |
| .....gaggaalAgagaagucgu.....     | 3     | 1 | seq |
| .....gUggaaggagaagucgu.....      | 11    | 1 | seq |
| .....gaggaaggagaCgucgu.....      | 1     | 1 | seq |
| .....gaggaaggagaagGcgu.....      | 14    | 1 | seq |
| .....gaCgaaggagaagucgu.....      | 1     | 1 | seq |
| .....gaggaaggagaagucgu.....      | 21597 | 0 | seq |
| .....gaggUaggagaagucgu.....      | 6     | 1 | seq |
| .....gaggaagUagaagucgu.....      | 7     | 1 | seq |
| .....gaAgaaggagaagucgu.....      | 13    | 1 | seq |
| .....gaggaagCagaagucgu.....      | 1     | 1 | seq |
| .....gaggaaggCgaagucgu.....      | 6     | 1 | seq |
| .....gaggaaggagCagucgu.....      | 5     | 1 | seq |
| .....gaggaaggagaagCcgucgu.....   | 66    | 1 | seq |
| .....gaggCaggagaagucgu.....      | 2     | 1 | seq |
| .....gaggaaggagaagucgAc.....     | 1     | 1 | seq |
| .....gaggaaggagaagucgGc.....     | 3     | 1 | seq |
| .....gaggaaggagaagucguG.....     | 394   | 1 | seq |
| .....gaggaaggagaagucgCc.....     | 2     | 1 | seq |
| .....gaggaaggagaagucguU.....     | 90    | 1 | seq |
| .....gaggaaggagaagucguc.....     | 19    | 0 | seq |
| .....gaggaaggagGagucguc.....     | 2     | 1 | seq |
| .....gaggaaggagaagucCuc.....     | 1     | 1 | seq |
| .....gaggaaggagaagucguGa.....    | 4     | 1 | seq |
| .....gaggaaggagaagucgucC.....    | 4     | 1 | seq |
| .....gaggaaggagaagucguca.....    | 1     | 0 | seq |
| .....gaggaaggagaagucguUa.....    | 1     | 1 | seq |
| .....gaggaaggagaagucgCca.....    | 1     | 1 | seq |
| .....gaggaaggagaagucgGca.....    | 2     | 1 | seq |
| .....gaggaaggagaagucgucaG.....   | 2     | 1 | seq |
| .....gaggaaggagaagucgucCa.....   | 1     | 1 | seq |
| .....gaggaaggagaagucgucaUug..... | 1     | 1 | seq |
| .....aggaaggagaagucgGc.....      | 5     | 1 | seq |
| .....aggaaggagaagucgCc.....      | 1     | 1 | seq |
| .....aggaaggagaagucguc.....      | 13    | 0 | seq |
| .....aggaaggagaagucguU.....      | 72    | 1 | seq |
| .....aggaaggGgaagucguc.....      | 1     | 1 | seq |
| .....aggaaggagaagucguG.....      | 291   | 1 | seq |
| .....aggaaggagaagucgGca.....     | 1     | 1 | seq |
| .....aggaaggagaagucguUa.....     | 3     | 1 | seq |
| .....aggaaggagaagucguGa.....     | 2     | 1 | seq |
| .....aggaaggagaagucgucaG.....    | 1     | 1 | seq |
| .....aggaaggagaagucgucCa.....    | 1     | 1 | seq |
| .....ggaaggagaagucguGa.....      | 1     | 1 | seq |
| .....ggaaggagaagucgucCa.....     | 1     | 1 | seq |
| .....gaaggagaagucgucaC.....      | 1     | 1 | seq |

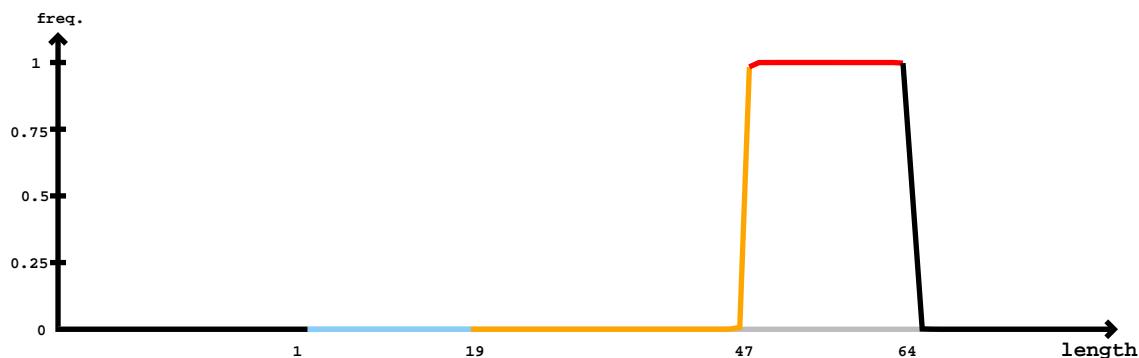

## Mature

## Star

## Mature

uuuuggcucagugaaaucuaagaagucuuuggucuucucgaauuuaaugucagaauuucaauugagaaugaggaaggagaagucgucaaugcuuucacugaugaaaa

|                                  |       |   |     |
|----------------------------------|-------|---|-----|
| .....gaggaaggagaagGcgu.....      | 14    | 1 | seq |
| .....gCggaaggagaagucgu.....      | 5     | 1 | seq |
| .....gagUaaggagaagucgu.....      | 5     | 1 | seq |
| .....gaggaaggGgaagucgu.....      | 83    | 1 | seq |
| .....gaggaaggagaagucCu.....      | 17    | 1 | seq |
| .....gaggaaggagUagucgu.....      | 19    | 1 | seq |
| .....gaggaCggagaagucgu.....      | 6     | 1 | seq |
| .....gGggaaggagaagucgu.....      | 82    | 1 | seq |
| .....gaggaaggagaUgucgu.....      | 13    | 1 | seq |
| .....gaggaaggagCagucgu.....      | 5     | 1 | seq |
| .....gaggaaggagaagucgu.....      | 21597 | 0 | seq |
| .....gaAgaaggagaagucgu.....      | 13    | 1 | seq |
| .....gaggaUggagaagucgu.....      | 13    | 1 | seq |
| .....gaggaGggagaagucgu.....      | 95    | 1 | seq |
| .....gaggaaggagaCgucgu.....      | 1     | 1 | seq |
| .....gaCgaaggagaagucgu.....      | 1     | 1 | seq |
| .....gaggaagCagaagucgu.....      | 1     | 1 | seq |
| .....gaggaaggagaCucgu.....       | 1     | 1 | seq |
| .....gaggaaggCgaagucgu.....      | 6     | 1 | seq |
| .....Naggaaggagaagucgu.....      | 33    | 1 | seq |
| .....gaggaaggagaagCcg.....       | 66    | 1 | seq |
| .....Caggaaggagaagucgu.....      | 10    | 1 | seq |
| .....gaggaaggagaagucguc.....     | 19    | 0 | seq |
| .....gaaggaaggagaagucgAc.....    | 1     | 1 | seq |
| .....gaggaaggagGagucguc.....     | 2     | 1 | seq |
| .....gaggaaggagaagucgGc.....     | 3     | 1 | seq |
| .....gaaggaaggagaagucgCc.....    | 2     | 1 | seq |
| .....gaggaaggagaagucguU.....     | 90    | 1 | seq |
| .....gaggaaggagaagucguG.....     | 394   | 1 | seq |
| .....gaggaaggagaagucCuc.....     | 1     | 1 | seq |
| .....gaggaaggagaagucguca.....    | 1     | 0 | seq |
| .....gaggaaggagaagucguUa.....    | 1     | 1 | seq |
| .....gaggaaggagaagucgucC.....    | 4     | 1 | seq |
| .....gaggaaggagaagucgCca.....    | 1     | 1 | seq |
| .....gaggaaggagaagucgGca.....    | 2     | 1 | seq |
| .....gaggaaggagaagucguGa.....    | 4     | 1 | seq |
| .....gaggaaggagaagucgucCa.....   | 1     | 1 | seq |
| .....gaggaaggagaagucgucaG.....   | 2     | 1 | seq |
| .....gaggaaggagaagucgucaUug..... | 1     | 1 | seq |
| .....agggaaggagaagucgGc.....     | 5     | 1 | seq |
| .....agggaaggagaagucguc.....     | 13    | 0 | seq |
| .....agggaaggagaagucguU.....     | 72    | 1 | seq |
| .....agggaaggagaagucgCc.....     | 1     | 1 | seq |
| .....agggaaggGgaagucguc.....     | 1     | 1 | seq |
| .....agggaaggagaagucguG.....     | 291   | 1 | seq |
| .....agggaaggagaagucguUa.....    | 3     | 1 | seq |
| .....agggaaggagaagucgGca.....    | 1     | 1 | seq |
| .....agggaaggagaagucguGa.....    | 2     | 1 | seq |
| .....agggaaggagaagucgucCa.....   | 1     | 1 | seq |
| .....agggaaggagaagucgucaG.....   | 1     | 1 | seq |
| .....ggaaggagaagucguGa.....      | 1     | 1 | seq |
| .....ggaaggagaagucgucCa.....     | 1     | 1 | seq |
| .....gaaggagaagucgucaC.....      | 1     | 1 | seq |

Provisional ID : MA\_7941935\_34004  
Score total : 0  
Score for star read(s) : -1.3  
Score for read counts : 0  
Score for mfe : -0.3  
Score for randfold : 1.6  
Score for cons. seed :  
Total read count : 365  
Mature read count : 365  
Loop read count : 0  
Star read count : 0

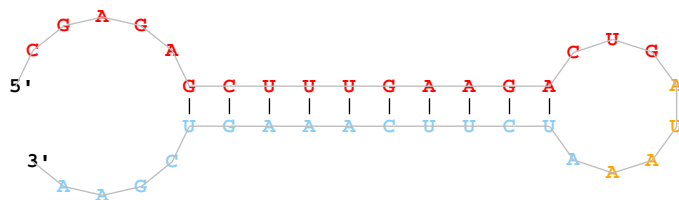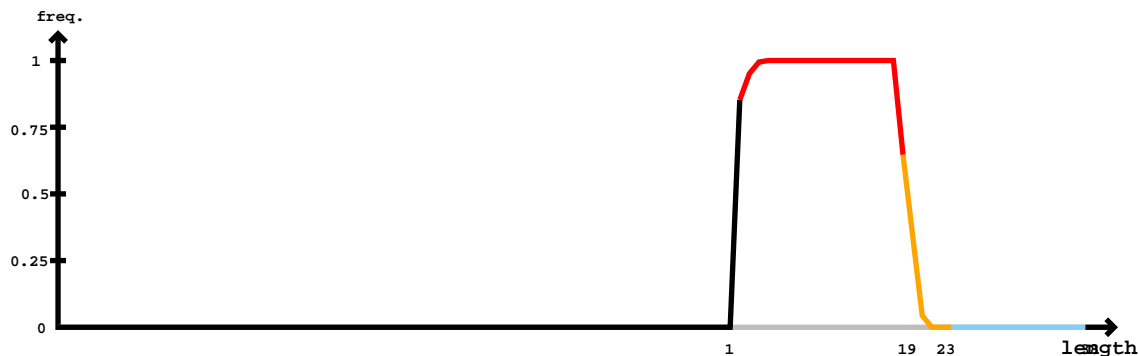

|    |                                                                                                               | Mature  |             | Star                 |     |     |     |  |
|----|---------------------------------------------------------------------------------------------------------------|---------|-------------|----------------------|-----|-----|-----|--|
| 5' | cagaagggauugcacuuuucuaaaguguugacaagaucacagaguuagacucguaggaggaucacaaaguu                                       | cgagagc | uuugaagacug | auaaucuucaaaagucgaag | aag | -3' | exp |  |
|    | .....((((((((.....)))))).....).((((.....(((.....))).....)))).....((((.....((((((((.....)))))).....))))))..... | reads   | mm          | sample               |     |     |     |  |
|    | .....cgagagcuuugaagacu.....                                                                                   | 1       | 0           | seq                  |     |     |     |  |
|    | .....Ugagagcuuugaagacu.....                                                                                   | 127     | 1           | seq                  |     |     |     |  |
|    | .....Ggagagcuuugaagacu.....                                                                                   | 1       | 1           | seq                  |     |     |     |  |
|    | .....Ugagagcuuugaagacug.....                                                                                  | 155     | 1           | seq                  |     |     |     |  |
|    | .....Ugagagcuuugaagacuga.....                                                                                 | 27      | 1           | seq                  |     |     |     |  |
|    | .....gagagUuuugaagacug.....                                                                                   | 1       | 1           | seq                  |     |     |     |  |
|    | .....gagagcuuugaagacug.....                                                                                   | 18      | 0           | seq                  |     |     |     |  |
|    | .....gagagcuuugaagacuA.....                                                                                   | 1       | 1           | seq                  |     |     |     |  |
|    | .....gagagcuuugaagaUug.....                                                                                   | 1       | 1           | seq                  |     |     |     |  |
|    | .....gagaUcuugaagacug.....                                                                                    | 2       | 1           | seq                  |     |     |     |  |
|    | .....gagagcuuugaagacuga.....                                                                                  | 6       | 0           | seq                  |     |     |     |  |
|    | .....gagaAcuugaagacugau.....                                                                                  | 4       | 1           | seq                  |     |     |     |  |
|    | .....gagagcuuugaagacugaA.....                                                                                 | 3       | 1           | seq                  |     |     |     |  |
|    | .....agagcuuugGagacuga.....                                                                                   | 1       | 1           | seq                  |     |     |     |  |
|    | .....agaUcuugaagacuga.....                                                                                    | 2       | 1           | seq                  |     |     |     |  |
|    | .....agagcuuugaagacuga.....                                                                                   | 6       | 0           | seq                  |     |     |     |  |
|    | .....agaAcuugaagacugau.....                                                                                   | 3       | 1           | seq                  |     |     |     |  |
|    | .....agagcuuugaagacugaA.....                                                                                  | 4       | 1           | seq                  |     |     |     |  |
|    | .....gaAcuugaagacugau.....                                                                                    | 2       | 1           | seq                  |     |     |     |  |

Provisional ID : MA\_7974910\_40632  
Score total : 0.6  
Score for star read(s) : -1.3  
Score for read counts : 0  
Score for mfe : 0.3  
Score for randfold : 1.6  
Score for cons. seed :  
Total read count : 250  
Mature read count : 250  
Loop read count : 0  
Star read count : 0

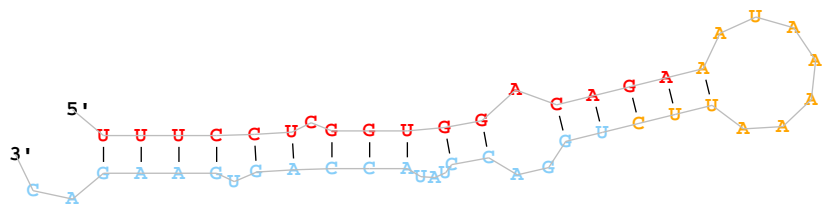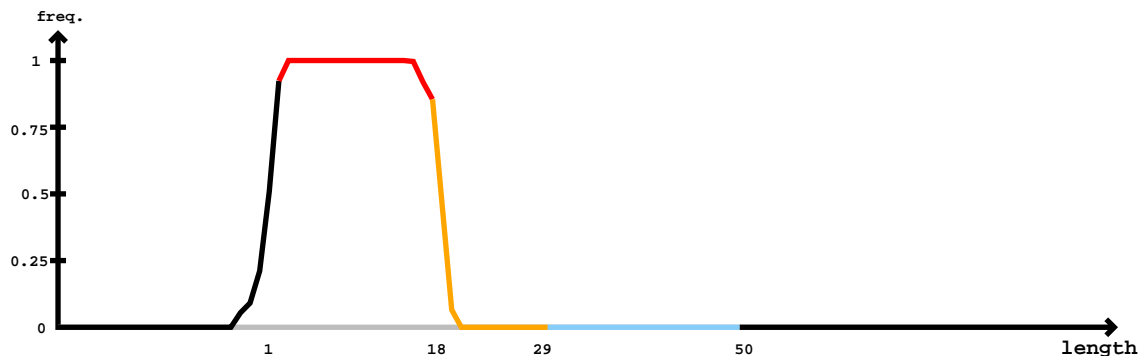

**Mature** **Star**

| 5' -                                                                                                                          | 3' -  | exp |        |
|-------------------------------------------------------------------------------------------------------------------------------|-------|-----|--------|
| ggaguguauuccagcagaaca <u>uuuccucgguggacaga</u> <u>aaauaaaaauuc</u> uggaccuauaccagugaagacugauaacccaaagagaaaaccuuuggaugcugggauu | reads | mm  | sample |
| .....((((((((.....(((((((.....)))))).))..))))).)))).....(((((((.....)))))).))..))))).))                                       | 1     | 1   | seq    |
| .....aUcauuuccucgguggac.....                                                                                                  | 5     | 1   | seq    |
| .....aUcauuuccucgguggaca.....                                                                                                 | 7     | 1   | seq    |
| .....aUcauuuccucgguggacaga.....                                                                                               | 2     | 1   | seq    |
| .....Ucauuuccucgguggaca.....                                                                                                  | 1     | 1   | seq    |
| .....Ucauuuccucgguggacag.....                                                                                                 | 2     | 1   | seq    |
| .....Ucauuuccucgguggacaga.....                                                                                                | 6     | 1   | seq    |
| .....Ucauuuccucgguggacagaa.....                                                                                               | 1     | 1   | seq    |
| .....cauuuccucgguggaca.....                                                                                                   | 10    | 0   | seq    |
| .....cauuuccucggugAaca.....                                                                                                   | 5     | 1   | seq    |
| .....cauuuccucgguggacag.....                                                                                                  | 2     | 0   | seq    |
| .....cauuuccucggugAacaga.....                                                                                                 | 8     | 1   | seq    |
| .....cauuuccucgguggacaga.....                                                                                                 | 4     | 0   | seq    |
| .....cauuuccucgguggacagaa.....                                                                                                | 1     | 0   | seq    |
| .....cauuuccucggugAacagaa.....                                                                                                | 3     | 1   | seq    |
| .....auuuccucgguggacag.....                                                                                                   | 13    | 0   | seq    |
| .....auuuccucgguggacaC.....                                                                                                   | 1     | 1   | seq    |
| .....auuuccucggugCcaga.....                                                                                                   | 1     | 1   | seq    |
| .....Guuuccucgguggacaga.....                                                                                                  | 1     | 1   | seq    |
| .....auuuccucgguggacaga.....                                                                                                  | 28    | 0   | seq    |
| .....auuuccucgguggacagU.....                                                                                                  | 1     | 1   | seq    |
| .....auCuccucgguggacaga.....                                                                                                  | 1     | 1   | seq    |
| .....auuuccucggugAacagaa.....                                                                                                 | 13    | 1   | seq    |
| .....auuuccucgguggacagaa.....                                                                                                 | 6     | 0   | seq    |
| .....auuuccucgguggacagaaU.....                                                                                                | 1     | 1   | seq    |
| .....auuuccucgguggacagaaG.....                                                                                                | 16    | 1   | seq    |
| .....Nuuccucgguggacaga.....                                                                                                   | 1     | 1   | seq    |
| .....uuuccucgguggacagG.....                                                                                                   | 1     | 1   | seq    |
| .....uuuccucgAuggacaga.....                                                                                                   | 1     | 1   | seq    |
| .....uuAccucgguggacaga.....                                                                                                   | 1     | 1   | seq    |
| .....uuuccucgguggacGga.....                                                                                                   | 1     | 1   | seq    |
| .....uuuccucggugUacaga.....                                                                                                   | 1     | 1   | seq    |
| .....uuuccucgguggacaga.....                                                                                                   | 80    | 0   | seq    |
| .....uuuccucgguggacagaa.....                                                                                                  | 15    | 0   | seq    |

MatureStar

|                                                                                                                                                         |    |   |     |
|---------------------------------------------------------------------------------------------------------------------------------------------------------|----|---|-----|
| ggaguguauuccagcagaaca <u>uuuccucggug</u> gacagaa <u>aa</u> uaaaaa <u>uuc</u> uggaccuauaccagugaagacugauaacc <sup>12</sup> caaagagaaaaccuuugggaugcugggauu | 12 | 1 | seq |
| .....uuuccucggugAacagaa.....                                                                                                                            | 1  | 1 | seq |
| .....uuuccucggugAacagaaa.....                                                                                                                           | 16 | 0 | seq |
| .....uuccucggugAacagaa.....                                                                                                                             | 5  | 1 | seq |



|                                                                                                                                                | -3'   | exp |        |
|------------------------------------------------------------------------------------------------------------------------------------------------|-------|-----|--------|
| 5'- uacaaccaacauagguguuuguggaug <u>uuuuuuuucauaaggugguuuuau</u> gcaugugu <u>aaacaaagau</u> c <u>ucuuuggugguaguagca</u> ucuucaggguuggnuuguugaug |       |     |        |
| .((((((((((.....(((.(((((((.(((.((((.(((.(((((((.....(((..))))))))))).))).)).).)))))))).)))))))).))....                                        | reads | mm  | sample |
| .....Gcucuuuggugguaguagc.....                                                                                                                  | 2     | 1   | seq    |
| .....cucuuuggugguaguagc.....                                                                                                                   | 3     | 0   | seq    |
| .....cucuuuggugguaguagU.....                                                                                                                   | 1     | 1   | seq    |
| .....Nucuuuggugguaguagc.....                                                                                                                   | 1     | 1   | seq    |
| .....Uucuuuggugguaguagca.....                                                                                                                  | 1     | 1   | seq    |
| .....cucuuuggugguaguagca.....                                                                                                                  | 2     | 0   | seq    |
| .....ucuuaggAgguaguagca.....                                                                                                                   | 19    | 1   | seq    |
| .....ucuuuggugguaAuuagca.....                                                                                                                  | 9     | 1   | seq    |
| .....ucuuuggugguaCuagca.....                                                                                                                   | 2     | 1   | seq    |
| .....ucuuugguggAaguagca.....                                                                                                                   | 6     | 1   | seq    |
| .....ucuuuggugAuaguagca.....                                                                                                                   | 18    | 1   | seq    |
| .....Ncuuggugguaguagca.....                                                                                                                    | 41    | 1   | seq    |
| .....ucuuuggugguagGagca.....                                                                                                                   | 15    | 1   | seq    |
| .....ucuuuggugguaguagca.....                                                                                                                   | 24505 | 0   | seq    |
| .....ucuuUgugguaguagca.....                                                                                                                    | 2     | 1   | seq    |
| .....ucuuugguggGaguagca.....                                                                                                                   | 12    | 1   | seq    |
| .....ucuuuggugguCguagca.....                                                                                                                   | 4     | 1   | seq    |
| .....ucuuAggugguaguagca.....                                                                                                                   | 5     | 1   | seq    |
| .....ucuuuggugguaguagcC.....                                                                                                                   | 65    | 1   | seq    |
| .....ucuuuggugCuaguagca.....                                                                                                                   | 1     | 1   | seq    |
| .....ucGuuggugguaguagca.....                                                                                                                   | 13    | 1   | seq    |
| .....ucuuuggGggguaguagca.....                                                                                                                  | 24    | 1   | seq    |
| .....ucuuuggugguagAagca.....                                                                                                                   | 11    | 1   | seq    |
| .....ucuuuggugUuaguagca.....                                                                                                                   | 5     | 1   | seq    |
| .....ucuuUgguaguagca.....                                                                                                                      | 7     | 1   | seq    |
| .....ucUGgugguaguagca.....                                                                                                                     | 6     | 1   | seq    |
| .....uGuuggugguaguagca.....                                                                                                                    | 2     | 1   | seq    |
| .....Acuuuggugguaguagca.....                                                                                                                   | 26    | 1   | seq    |
| .....ucuuAgugguaguagca.....                                                                                                                    | 10    | 1   | seq    |
| .....ucuuCggugguaguagca.....                                                                                                                   | 50    | 1   | seq    |
| .....ucAuggugguaguagca.....                                                                                                                    | 16    | 1   | seq    |
| .....ucuuuggugguaguagcCu.....                                                                                                                  | 1     | 1   | seq    |
| .....ucuuuggugguaguagcUu.....                                                                                                                  | 1     | 1   | seq    |
| .....ucuuuggugguaguagcau.....                                                                                                                  | 26    | 0   | seq    |



## Star

## Mature

|                                                                                                                 |    |   |     |
|-----------------------------------------------------------------------------------------------------------------|----|---|-----|
| uacaaccaacauagguguuuguggauguuuuuuuuucauaaggugguuuuuugcauguguaaacaagaucucuuuggguguaguagcaucucucaggguugguuguugaug |    |   |     |
| .....ucuuuggguguaguagcGu.....                                                                                   | 2  | 1 | seq |
| .....ucuuuggguUguaguagcau.....                                                                                  | 1  | 1 | seq |
| .....ucuuuggguguaguagcaG.....                                                                                   | 61 | 1 | seq |
| .....ucuuuggguguGguagcau.....                                                                                   | 1  | 1 | seq |
| .....ucuuuggguguaguagcaC.....                                                                                   | 2  | 1 | seq |
| .....ucuuuggguguaguagcauG.....                                                                                  | 2  | 1 | seq |
| .....ucuuuggguguaguagcaGC.....                                                                                  | 1  | 1 | seq |
| .....ucuuuggguguaguagcauA.....                                                                                  | 2  | 1 | seq |
| .....ucuuuggguguaguagcaAc.....                                                                                  | 3  | 1 | seq |
| .....ucuuuggguguaguagcauU.....                                                                                  | 1  | 1 | seq |
| .....ucuuuggguguaguagcauC.....                                                                                  | 1  | 1 | seq |
| .....ucuuuggguguaguagcauAu.....                                                                                 | 1  | 1 | seq |
| .....ucuuuggguguaguagcaucu.....                                                                                 | 2  | 0 | seq |
| .....ucuuuggguguaguagcauCcu.....                                                                                | 1  | 1 | seq |
| .....cuuggguguaguagcau.....                                                                                     | 21 | 0 | seq |
| .....cuuUgguaguagcau.....                                                                                       | 1  | 1 | seq |
| .....cuuggguguaguagcaG.....                                                                                     | 48 | 1 | seq |
| .....cuuggguguaguagcauc.....                                                                                    | 1  | 0 | seq |
| .....cuuggguguaguagcaCC.....                                                                                    | 2  | 1 | seq |
| .....cuuggguguaguagcaGc.....                                                                                    | 1  | 1 | seq |
| .....cuuggguguaguagcauG.....                                                                                    | 1  | 1 | seq |
| .....cuuggguguaguagcaAcu.....                                                                                   | 1  | 1 | seq |
| .....cuuggguguaguagcauC.....                                                                                    | 1  | 1 | seq |
| .....uggguguaguagcauAu.....                                                                                     | 1  | 1 | seq |

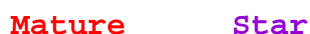

| 5'                                                                                                                                | 3'    | obs |        |
|-----------------------------------------------------------------------------------------------------------------------------------|-------|-----|--------|
| aaguuuguuguaguuaaaaaucucgcaguuuggaauucuuuggguc <u>uaaaggguccggucgcgcua</u> cuuugggugugacacugcccuuuccgcccuuuugucggugggcgugcuccua   |       |     |        |
| aaguuuguuguaguuaaaaaucucgcaguuuggaauucuuuggguc <u>uaaaggguccggucgcgcua</u> cuuugggugugugacacugcccuuuccgcccuuuugucggugggcgugcuccua |       |     | exp    |
| .....(.(.((.(.(((.....(((.....(((.....(((.....)))..).)))..).))).....))).....)).....                                               | reads | mm  | sample |
| .aguuuguuguaguuaaaaa.....                                                                                                         | 1     | 0   | seq    |
| .....aguuaaaaaGcucgcag.....                                                                                                       | 1     | 1   | seq    |
| .....aguuaaaaaGcucgcaguu.....                                                                                                     | 2     | 1   | seq    |
| .....aguuaaaaaGcucgcaguu.....                                                                                                     | 1     | 1   | seq    |
| .....aguuaaaaaGcucgcaguuugg.....                                                                                                  | 1     | 1   | seq    |
| .....aguuaaaaaGcucgcaguuugga.....                                                                                                 | 2     | 1   | seq    |
| .....aguuaaaaaGcucgcaguuuggauc.....                                                                                               | 3     | 1   | seq    |
| .....aguuaaaaaGcucgcaguuuggaucu.....                                                                                              | 3     | 1   | seq    |
| .....aguuaaaaaGcucgcaguuuggaucuu.....                                                                                             | 1     | 1   | seq    |
| .....aguuaaaaaGcucgcaguuuggaucuug.....                                                                                            | 1     | 1   | seq    |
| .....aguuaaaaaGcucgcaguuuggaucuuggg.....                                                                                          | 2     | 1   | seq    |
| .....aguuaaaaaGcucgcaguuuggaucuugggguc.....                                                                                       | 1     | 1   | seq    |
| .....guuaaaaaGcucgcaguu.....                                                                                                      | 4     | 1   | seq    |
| .....guuaaaaaGcucgcaguu.....                                                                                                      | 4     | 1   | seq    |
| .....guuaaaaaGcucgcaguuugg.....                                                                                                   | 1     | 1   | seq    |
| .....guuaaaaaGcucgcaguuuggau.....                                                                                                 | 6     | 1   | seq    |
| .....guuaaaaaGcucgcaguuuggauc.....                                                                                                | 2     | 1   | seq    |
| .....guuaaaaaGcucgcaguuuggaucu.....                                                                                               | 7     | 1   | seq    |
| .....guuaaaaaGcucgcaguuuggaucuu.....                                                                                              | 2     | 1   | seq    |
| .....guuaaaaaGcucgcaguuuggaucuug.....                                                                                             | 7     | 1   | seq    |
| .....guuaaaaaGcucgcaguuuggaucuuggg.....                                                                                           | 4     | 1   | seq    |
| .....guuaaaaaGcucgcaguuuggaucuugggu.....                                                                                          | 1     | 1   | seq    |
| .....guuaaaaaGcucgcaguuuggaucuugggguc.....                                                                                        | 1     | 1   | seq    |
| .....uuaaaaaGcucgcaguu.....                                                                                                       | 2     | 1   | seq    |
| .....uuaaaaaGcucgcaguuugg.....                                                                                                    | 11    | 1   | seq    |
| .....uuaaaaaGcucgcaguuugga.....                                                                                                   | 4     | 1   | seq    |
| .....uuaaaaaGcucgcaguuuggau.....                                                                                                  | 1     | 1   | seq    |
| .....uuaaaaaGcucgcaguuuggauc.....                                                                                                 | 5     | 1   | seq    |
| .....uuaaaaaGcucgcaguuuggaucu.....                                                                                                | 5     | 1   | seq    |
| .....uuaaaaaGcucgcaguuuggaucuu.....                                                                                               | 4     | 1   | seq    |
| .....uuaaaaaGcucgcaguuuggaucuug.....                                                                                              | 3     | 1   | seq    |
| .....uuaaaaaGcucgcaguuuggaucuugg.....                                                                                             | 4     | 1   | seq    |
| .....uuaaaaaGcucgcaguuuggaucuuggg.....                                                                                            | 4     | 1   | seq    |

# Mature Star

|                                              |    |   |     |
|----------------------------------------------|----|---|-----|
| aaguuguuguaguuaaaaaucucgcaguuaggauucuuuggguc | 2  | 1 | seq |
| .....uuaaaaaGcucgcaguuaggauucuuuggguc.....   | 9  | 1 | seq |
| .....uaaaaaGcucgcaguuagg.....                | 6  | 1 | seq |
| .....uaaaaaGcucgcaguuaggau.....              | 3  | 1 | seq |
| .....uaaaaaGcucgcaguuaggau.....              | 11 | 1 | seq |
| .....uaaaaaGcucgcaguuaggau.....              | 6  | 1 | seq |
| .....uaaaaaGcucgcaguuaggau.....              | 4  | 1 | seq |
| .....uaaaaaGcucgcaguuaggau.....              | 6  | 1 | seq |
| .....uaaaaaGcucgcaguuaggau.....              | 3  | 1 | seq |
| .....uaaaaaGcucgcaguuaggau.....              | 5  | 1 | seq |
| .....uaaaaaGcucgcaguuaggau.....              | 3  | 1 | seq |
| .....uaaaaaGcucgcaguuaggau.....              | 2  | 1 | seq |
| .....aaaaaGcucgcaguuagg.....                 | 4  | 1 | seq |
| .....aaaaaGcucgcaguuagg.....                 | 9  | 1 | seq |
| .....aaaaaGcucgcaguuaggau.....               | 4  | 1 | seq |
| .....aaaaaGcucgcaguuaggau.....               | 4  | 1 | seq |
| .....aaaaaGcucgcaguuaggau.....               | 3  | 1 | seq |
| .....aaaaaGcucgcaguuaggau.....               | 2  | 1 | seq |
| .....aaaaaGcucgcaguuaggau.....               | 5  | 1 | seq |
| .....aaaaaGcucgcaguuaggau.....               | 1  | 1 | seq |
| .....aaaaaGcucgcaguuaggau.....               | 3  | 1 | seq |
| .....aaaaaGcucgcaguuaggau.....               | 1  | 1 | seq |
| .....aaaaaGcucgcaguuaggau.....               | 3  | 1 | seq |
| .....aaaaaGcucgcaguuaggau.....               | 2  | 1 | seq |
| .....aaaaaGcucgcaguuaggau.....               | 1  | 1 | seq |
| .....aaaaaGcucgcaguuaggau.....               | 1  | 1 | seq |
| .....aaaaaGcucgcaguuaggau.....               | 3  | 1 | seq |
| .....aaaaaGcucgcaguuaggau.....               | 7  | 1 | seq |
| .....aaaaaGcucgcaguuaggau.....               | 3  | 1 | seq |
| .....aaaaaGcucgcaguuaggau.....               | 3  | 1 | seq |
| .....aaaaaGcucgcaguuaggau.....               | 17 | 1 | seq |
| .....aaaaaGcucgcaguuaggau.....               | 8  | 1 | seq |
| .....aaaaaGcucgcaguuaggau.....               | 1  | 0 | seq |
| .....aaaaaGcucgcaguuaggau.....               | 4  | 1 | seq |
| .....aaaaaGcucgcaguuaggau.....               | 7  | 1 | seq |
| .....aaaaaGcucgcaguuaggau.....               | 3  | 1 | seq |
| .....aaaaaGcucgcaguuaggau.....               | 10 | 1 | seq |
| .....aaaaaGcucgcaguuaggau.....               | 9  | 1 | seq |
| .....aaaaaGcucgcaguuaggau.....               | 10 | 1 | seq |
| .....aaaaaGcucgcaguuaggau.....               | 8  | 1 | seq |
| .....aaaaaGcucgcaguuaggau.....               | 3  | 1 | seq |
| .....aaaaaGcucgcaguuaggau.....               | 2  | 1 | seq |
| .....aaaaaGcucgcaguuaggau.....               | 1  | 1 | seq |
| .....aaaaaGcucgcaguuaggau.....               | 5  | 1 | seq |
| .....aaaaaGcucgcaguuaggau.....               | 3  | 1 | seq |
| .....aaaaaGcucgcaguuaggau.....               | 18 | 1 | seq |
| .....aaaaaGcucgcaguuaggau.....               | 4  | 1 | seq |
| .....aaaaaGcucgcaguuaggau.....               | 3  | 1 | seq |
| .....aaaaaGcucgcaguuaggau.....               | 3  | 1 | seq |
| .....aaaaaGcucgcaguuaggau.....               | 2  | 1 | seq |
| .....aaaaaGcucgcaguuaggau.....               | 2  | 1 | seq |
| .....aaaaaGcucgcaguuaggau.....               | 12 | 1 | seq |
| .....aaaaaGcucgcaguuaggau.....               | 25 | 1 | seq |
| .....aaaaaGcucgcaguuaggau.....               | 18 | 1 | seq |
| .....aaaaaGcucgcaguuaggau.....               | 1  | 1 | seq |
| .....aaaaaGcucgcaguuaggau.....               | 20 | 1 | seq |
| .....aaaaaGcucgcaguuaggau.....               | 4  | 1 | seq |
| .....aaaaaGcucgcaguuaggau.....               | 23 | 1 | seq |
| .....aaaaaGcucgcaguuaggau.....               | 1  | 1 | seq |
| .....aaaaaGcucgcaguuaggau.....               | 1  | 1 | seq |
| .....aaaaaGcucgcaguuaggau.....               | 2  | 1 | seq |
| .....aaaaaGcucgcaguuaggau.....               | 5  | 1 | seq |
| .....aaaaaGcucgcaguuaggau.....               | 1  | 1 | seq |
| .....aaaaaGcucgcaguuaggau.....               | 12 | 0 | seq |
| .....aaaaaGcucgcaguuaggau.....               | 1  | 1 | seq |
| .....aaaaaGcucgcaguuaggau.....               | 1  | 1 | seq |
| .....aaaaaGcucgcaguuaggau.....               | 6  | 0 | seq |
| .....aaaaaGcucgcaguuaggau.....               | 1  | 1 | seq |
| .....aaaaaGcucgcaguuaggau.....               | 8  | 0 | seq |

# Mature Star

|                                                     |    |   |     |
|-----------------------------------------------------|----|---|-----|
| aaguuguuguaguuaaaaaucgcaguuaggauuuuggguc            | 4  | 1 | seq |
| .....cucgGaguuaggauuuuggg.....                      | 11 | 0 | seq |
| .....cucgcaguuaggauuuugggu.....                     | 1  | 1 | seq |
| .....cucgGaguuaggauuuuggguc.....                    | 2  | 0 | seq |
| .....cucgcaguuaggauuuuggguc.....                    | 11 | 1 | seq |
| .....cucgcaguuaggauuuugggucG.....                   | 1  | 0 | seq |
| .....cucgcaguuaggauuuugggucGu.....                  | 11 | 1 | seq |
| .....cucgcaguuaggauuuugggucGua.....                 | 6  | 1 | seq |
| .....cucgcaguuaggauuuugggucGuaaa.....               | 3  | 1 | seq |
| .....cucgcaguuaggauuuugggucGuaaaggu.....            | 1  | 1 | seq |
| .....cucgcaguuaggauuuugggucGuaaagguc.....           | 1  | 1 | seq |
| .....cucgcaguuaggauuuugggucGuaaaggucgguccg.....     | 7  | 1 | seq |
| .....cucgcaguuaggauuuugggucGuaaaggucgguccgcc.....   | 5  | 1 | seq |
| .....cucgcaguuaggauuuugggucGuaaaggucgguccgccu.....  | 6  | 1 | seq |
| .....cucgcaguuaggauuuugggucGuaaaggucgguccgccua..... | 1  | 1 | seq |
| .....ucgcaguuaggauuuugg.....                        | 4  | 0 | seq |
| .....ucgAaguuaggauuuugg.....                        | 1  | 1 | seq |
| .....ucgAaguuaggauuuuggg.....                       | 1  | 1 | seq |
| .....ucgcaguuaggACuuugggu.....                      | 1  | 1 | seq |
| .....ucgGaguuaggauuuugggu.....                      | 1  | 1 | seq |
| .....ucgcaguuaggauuuugggu.....                      | 1  | 0 | seq |
| .....ucgcaguuaggauuuugggucG.....                    | 3  | 1 | seq |
| .....ucgcaguuaggauuuugggucGu.....                   | 2  | 1 | seq |
| .....ucgcaguuaggauuuugggucGua.....                  | 6  | 1 | seq |
| .....ucgcaguuaggauuuugggucGuaaa.....                | 1  | 1 | seq |
| .....ucgcaguuaggauuuugggucGuaaagg.....              | 1  | 1 | seq |
| .....ucgcaguuaggauuuugggucGuaaagguc.....            | 1  | 1 | seq |
| .....ucgcaguuaggauuuugggucGuaaaggucgg.....          | 1  | 1 | seq |
| .....ucgcaguuaggauuuugggucGuaaaggucggucc.....       | 1  | 1 | seq |
| .....ucgcaguuaggauuuugggucGuaaaggucggucccg.....     | 1  | 1 | seq |
| .....ucgcaguuaggauuuugggucGuaaaggucgguccgccu.....   | 1  | 1 | seq |
| .....cgaguuaggauuuuggC.....                         | 1  | 1 | seq |
| .....cgaguuaggauuuuggA.....                         | 1  | 1 | seq |
| .....cgAaguuaggauuuuggg.....                        | 1  | 1 | seq |
| .....cgaguuaggauuuuggg.....                         | 2  | 0 | seq |
| .....cgaguuaggauuuugggu.....                        | 4  | 0 | seq |
| .....cgaguuaggauuuugggC.....                        | 1  | 1 | seq |
| .....cgAaguuaggauuuugggu.....                       | 1  | 1 | seq |
| .....cgaguuaggauuuuggguU.....                       | 1  | 1 | seq |
| .....cgaguuaggauuuuggguc.....                       | 1  | 0 | seq |
| .....cgaguuaggauuuugggucG.....                      | 7  | 1 | seq |
| .....cgaguuaggauuuugggucGua.....                    | 4  | 1 | seq |
| .....cgaguuaggauuuugggucGuaa.....                   | 2  | 1 | seq |
| .....cgaguuaggauuuugggucGuaaaa.....                 | 1  | 1 | seq |
| .....cgaguuaggauuuugggucGuaaaggucg.....             | 1  | 1 | seq |
| .....cgaguuaggauuuugggucGuaaaggucgggu.....          | 2  | 1 | seq |
| .....cgaguuaggauuuugggucGuaaaggucggucc.....         | 6  | 1 | seq |
| .....cgaguuaggauuuugggucGuaaaggucggucccg.....       | 2  | 1 | seq |
| .....cgaguuaggauuuugggucGuaaaggucgguccgc.....       | 1  | 1 | seq |
| .....cgaguuaggauuuugggucGuaaaggucgguccgccu.....     | 3  | 1 | seq |
| .....gcaguuaggauuuugggC.....                        | 1  | 1 | seq |
| .....gcaguuaggauuuugggu.....                        | 4  | 0 | seq |
| .....gGaguuaggauuuuggguc.....                       | 1  | 1 | seq |
| .....gcaguuaggauuuuggguc.....                       | 2  | 0 | seq |
| .....gcaguuaggauuuugggucG.....                      | 2  | 1 | seq |
| .....gcaguuaggauuuugggucGu.....                     | 5  | 1 | seq |
| .....gcaguuaggauuuugggucGua.....                    | 6  | 1 | seq |
| .....gcaguuaggauuuugggucGuaa.....                   | 1  | 1 | seq |
| .....gcaguuaggauuuugggucGuaaaggucgg.....            | 3  | 1 | seq |
| .....gcaguuaggauuuugggucGuaaaggucgggu.....          | 1  | 1 | seq |
| .....gcaguuaggauuuugggucGuaaaggucgguc.....          | 1  | 1 | seq |
| .....gcaguuaggauuuugggucGuaaaggucggucc.....         | 1  | 1 | seq |
| .....gcaguuaggauuuugggucGuaaaggucgguccgccu.....     | 1  | 1 | seq |
| .....caguuaggauuuuggguc.....                        | 4  | 0 | seq |
| .....Naguuaggauuuuggguc.....                        | 3  | 1 | seq |
| .....Aaguuaggauuuuggguc.....                        | 1  | 1 | seq |
| .....Gaguuaggauuuuggguc.....                        | 5  | 1 | seq |
| .....Aaguuaggauuuuggguca.....                       | 1  | 1 | seq |
| .....caguuaggauuuuggguca.....                       | 2  | 0 | seq |
| .....aguaggauuuugggucC.....                         | 6  | 1 | seq |

# Mature Star

|                                                                                                               |    |   |     |
|---------------------------------------------------------------------------------------------------------------|----|---|-----|
| aaguuguuguaguuaaaaaaucucgcaguuaggauucuuagggucauaaaggguccggucccuacuuaggguugcaccugcccccuccuuuugucgguggcguguccua |    |   |     |
| ..... .aguuggauucuuaggguca.....                                                                               | 79 | 0 | seq |
| ..... .aguuggauucuuaggguU.....                                                                                | 24 | 1 | seq |
| ..... .aguAaggauucuuaggguca.....                                                                              | 1  | 1 | seq |
| ..... .aguuAgaucuuaggguca.....                                                                                | 1  | 1 | seq |
| ..... .aguuggauucuuagggucau.....                                                                              | 2  | 0 | seq |
| ..... .aguuggauucuuagggucaua.....                                                                             | 4  | 0 | seq |
| ..... .aguuggauucuuagggucauaaa.....                                                                           | 1  | 0 | seq |
| ..... .aguuggauucuuagggucauaaaaggucgg.....                                                                    | 1  | 0 | seq |
| ..... .guuggauucuuaggguCu.....                                                                                | 2  | 1 | seq |
| ..... .guuggauucuuagggucau.....                                                                               | 10 | 0 | seq |
| ..... .guuggauucuuaggAucaua.....                                                                              | 1  | 1 | seq |
| ..... .guuggauucuuagggucaua.....                                                                              | 6  | 0 | seq |
| ..... .guAaggauucuuagggucaua.....                                                                             | 1  | 1 | seq |
| ..... .guuggauucuuagggucaCa.....                                                                              | 1  | 1 | seq |
| ..... .guuggauucuuaggguCUua.....                                                                              | 1  | 1 | seq |
| ..... .guuggauucuuaggguCUua.....                                                                              | 1  | 1 | seq |
| ..... .guuggauucuuagggucauaaaagg.....                                                                         | 1  | 0 | seq |
| ..... .guuggauucuuagggucauaaaaggu.....                                                                        | 2  | 0 | seq |
| ..... .guuggauucuuagggucauaaaaggucg.....                                                                      | 1  | 0 | seq |
| ..... .guuggauucuuaggguCUuaaaaggucgg.....                                                                     | 2  | 1 | seq |
| ..... .guuggauucuuagggucauaaaaggucgg.....                                                                     | 2  | 0 | seq |
| ..... .guuggauucuuagggucauaaaaggucgguc.....                                                                   | 1  | 0 | seq |
| ..... .guuggauucuuaggguCUuaaaaggucgguc.....                                                                   | 1  | 1 | seq |
| ..... .guuggauucuuagggucauaaaaggucgguccgcuau.....                                                             | 1  | 1 | seq |
| ..... .uuggauucuuagggucaua.....                                                                               | 18 | 0 | seq |
| ..... .uuggauucuuagggucaGa.....                                                                               | 2  | 1 | seq |
| ..... .uuggauucuuaggguCUua.....                                                                               | 8  | 1 | seq |
| ..... .uuggauucuuagggucauaa.....                                                                              | 3  | 0 | seq |
| ..... .uuggauucuuaggguCUuaa.....                                                                              | 2  | 1 | seq |
| ..... .uuggauucuuagggucauaa.....                                                                              | 1  | 0 | seq |
| ..... .uuggauucuuaggguCUuaaag.....                                                                            | 1  | 1 | seq |
| ..... .uuggauucuuagggucauaaaaggC.....                                                                         | 1  | 1 | seq |
| ..... .uuggauucuuagggucauaaaaggucC.....                                                                       | 1  | 1 | seq |
| ..... .uuggauucuuagggucauaaaaggucgg.....                                                                      | 1  | 0 | seq |
| ..... .uuggauucuuagggucauaaaaggucgg.....                                                                      | 1  | 0 | seq |
| ..... .uuggauucuuagggucauaaaaggucggucc.....                                                                   | 1  | 0 | seq |
| ..... .uuggauucuuagggucauaaaaggucgguccg.....                                                                  | 1  | 0 | seq |
| ..... .uuggauucuuagggucauaaaaggucgguccgcc.....                                                                | 1  | 0 | seq |
| ..... .uggauucuuaggguCUua.....                                                                                | 1  | 1 | seq |
| ..... .uggauucuuagggucauUa.....                                                                               | 1  | 1 | seq |
| ..... .uggauucuuagggucauaa.....                                                                               | 2  | 0 | seq |
| ..... .uggauucuuagggucauaa.....                                                                               | 1  | 0 | seq |
| ..... .uggauucuuagggucauaaaagg.....                                                                           | 2  | 0 | seq |
| ..... .uggauucuuagggucauaaaaggucgg.....                                                                       | 2  | 0 | seq |
| ..... .uggauucuuaggguCUuaaaaggucgguccgccua.....                                                               | 2  | 1 | seq |
| ..... .uggauucuuagggucauaaaaggucgguccgccua.....                                                               | 1  | 0 | seq |
| ..... .uggauucuuaggguCUuaaaaggucgguccgccua.....                                                               | 1  | 1 | seq |
| ..... .ggGucuuagggucauaaaagg.....                                                                             | 1  | 1 | seq |
| ..... .ggauucuuaggguCUuaaaagg.....                                                                            | 1  | 1 | seq |
| ..... .ggauucuuagggucauaaaagg.....                                                                            | 1  | 0 | seq |
| ..... .ggauucuuagggucauaaaaggucgg.....                                                                        | 1  | 0 | seq |
| ..... .aucuuagggucauaaaagg.....                                                                               | 2  | 0 | seq |
| ..... .aucuuaggguCUuaaaaggucg.....                                                                            | 1  | 1 | seq |
| ..... .aucuuagggucauaaaaggucg.....                                                                            | 1  | 0 | seq |
| ..... .aucuuagggucauaaaaggucgg.....                                                                           | 3  | 0 | seq |
| ..... .aucuuaggguCUuaaaaggucgg.....                                                                           | 1  | 1 | seq |
| ..... .aucuuagggCcauaaaaggucgg.....                                                                           | 1  | 1 | seq |
| ..... .aucuuagggucauaaaaggucggU.....                                                                          | 1  | 1 | seq |
| ..... .aucuuagggucauaaaaggucgguc.....                                                                         | 1  | 0 | seq |
| ..... .aucuuagggucauaaaaggucgguccccu.....                                                                     | 1  | 0 | seq |
| ..... .aucuuagggucauaaaaggucgguccgccua.....                                                                   | 1  | 0 | seq |
| ..... .ucuuagggucauaaaaggC.....                                                                               | 1  | 1 | seq |
| ..... .ucuuagggucauaaaagg.....                                                                                | 2  | 0 | seq |
| ..... .ucuuagggucauaaaaggucg.....                                                                             | 2  | 0 | seq |
| ..... .ucuuaggguCUuaaaaggucg.....                                                                             | 1  | 1 | seq |
| ..... .ucuuagggucauaaaaggucgg.....                                                                            | 5  | 0 | seq |
| ..... .ucuuagggucauaaaaggucggA.....                                                                           | 1  | 1 | seq |

# Mature Star

|                                             |                   |                                               |   |   |     |
|---------------------------------------------|-------------------|-----------------------------------------------|---|---|-----|
| aaguuguuguaguuaaaaaucucgcaguggaucuuugggucua | uaaaggucggucgccua | cuuggugcaccugcccuuccgccccuuugucgguggcguguccua |   |   |     |
| .....ucuuugggucuaaaaggucggg.....            |                   |                                               | 2 | 0 | seq |
| .....ucuuugggucuaaaaggucgggccc.....         |                   |                                               | 1 | 0 | seq |
| .....ucuuugggucUuaaaggucgggucgc.....        |                   |                                               | 1 | 1 | seq |
| .....ucuuugggucuaaaaggucUgucgc.....         |                   |                                               | 1 | 1 | seq |
| .....ucuuugggucuaaaaggucgggucgcc.....       |                   |                                               | 1 | 0 | seq |
| .....ucuuugggucuaaaaggucgggucgccu.....      |                   |                                               | 1 | 0 | seq |
| .....ucuuugggucuaaaaggucgggucgccuaU.....    |                   |                                               | 1 | 1 | seq |
| .....cuugggucuaaaagguc.....                 |                   |                                               | 1 | 0 | seq |
| .....cuugggucuaaaaggucgc.....               |                   |                                               | 1 | 0 | seq |
| .....cuugggucuaaaaggucgg.....               |                   |                                               | 3 | 0 | seq |
| .....cuugggucuaaaaggucggg.....              |                   |                                               | 1 | 1 | seq |
| .....cuugggucuaaaaggucggg.....              |                   |                                               | 1 | 0 | seq |
| .....cuugggucuaaaaggucggg.....              |                   |                                               | 1 | 0 | seq |
| .....cuugggucuaaaaggucggg.....              |                   |                                               | 1 | 0 | seq |
| .....cuugggucuaaaaggucggg.....              |                   |                                               | 2 | 0 | seq |
| .....cuugggucuaaaaggucggg.....              |                   |                                               | 3 | 0 | seq |
| .....cuugggucUuaaaggucgggucgccu.....        |                   |                                               | 1 | 1 | seq |
| .....cuugggucCuaaaggucgggucgccua.....       |                   |                                               | 1 | 1 | seq |
| .....cuugggucuaaaaggucgggucgccuaU.....      |                   |                                               | 1 | 1 | seq |
| .....uugggucCuaaaggucgc.....                |                   |                                               | 1 | 1 | seq |
| .....uugggucuaaaaggucA.....                 |                   |                                               | 1 | 1 | seq |
| .....uugggucuaaaaggucgg.....                |                   |                                               | 1 | 0 | seq |
| .....uugggucuaaaaggucggC.....               |                   |                                               | 3 | 1 | seq |
| .....uugggucuaaaaggucggG.....               |                   |                                               | 1 | 1 | seq |
| .....uugggucuaaaaggucgguc.....              |                   |                                               | 2 | 0 | seq |
| .....uugggucuaaaaggucgg.....                |                   |                                               | 1 | 0 | seq |
| .....uugggucUuaaaggucgggucgc.....           |                   |                                               | 1 | 1 | seq |
| .....uugggucUuaaaggucgggucgccua.....        |                   |                                               | 1 | 1 | seq |
| .....gggucuaaaaggucggg.....                 |                   |                                               | 1 | 0 | seq |
| .....gggucuaaaaggucggC.....                 |                   |                                               | 1 | 1 | seq |
| .....gggucuaaaaggucgguc.....                |                   |                                               | 3 | 0 | seq |
| .....ggucuaaaaggucgguc.....                 |                   |                                               | 1 | 0 | seq |
| .....ggucuaaaaggucgggucgccA.....            |                   |                                               | 1 | 1 | seq |
| .....ggucCuaaaggucgggucgccu.....            |                   |                                               | 1 | 1 | seq |
| .....ggucuaaaaggucgggucgccuaU.....          |                   |                                               | 1 | 1 | seq |
| .....gucUuaaaggucgggucgc.....               |                   |                                               | 2 | 1 | seq |
| .....gucuaaaaggucgggucgcU.....              |                   |                                               | 1 | 1 | seq |
| .....gucuaaaaggucgggucgccu.....             |                   |                                               | 2 | 0 | seq |
| .....gucUuaaaggucgggucgccu.....             |                   |                                               | 1 | 1 | seq |
| .....ucauaaaaggucgggucgc.....               |                   |                                               | 1 | 0 | seq |
| .....ucUuaaaggucgggucgc.....                |                   |                                               | 1 | 1 | seq |
| .....ucauaaaaggucgggucgc.....               |                   |                                               | 1 | 0 | seq |
| .....ucauaaaaggucgggucgcc.....              |                   |                                               | 2 | 0 | seq |
| .....ucUuaaaggucgggucgcc.....               |                   |                                               | 3 | 1 | seq |
| .....ucauaaaaggucgggucgccC.....             |                   |                                               | 1 | 1 | seq |
| .....ucauaaaaggucgggucgccG.....             |                   |                                               | 1 | 1 | seq |
| .....ucUuaaaggucgggucgccu.....              |                   |                                               | 2 | 1 | seq |
| .....ucauaaaaggucgggucgccu.....             |                   |                                               | 2 | 0 | seq |
| .....ucauaaaaggucgggucgccua.....            |                   |                                               | 2 | 0 | seq |
| .....cauaaaaggucgggucgccA.....              |                   |                                               | 1 | 1 | seq |
| .....cUuaaaggucgggucgcc.....                |                   |                                               | 5 | 1 | seq |
| .....cauaaaaggucgggucgcc.....               |                   |                                               | 2 | 0 | seq |
| .....cauaaaaggucgggucgccu.....              |                   |                                               | 4 | 0 | seq |
| .....cUuaaaggucgggucgccu.....               |                   |                                               | 2 | 1 | seq |
| .....cauaaaaggucgggucgccua.....             |                   |                                               | 1 | 0 | seq |
| .....cUuaaaggucgggucgccua.....              |                   |                                               | 1 | 1 | seq |
| .....Cuaaaggucgggucgcc.....                 |                   |                                               | 4 | 1 | seq |
| .....Nuuaaaggucgggucgcc.....                |                   |                                               | 2 | 1 | seq |
| .....Cuaaaggucgggucgccu.....                |                   |                                               | 3 | 1 | seq |
| .....auuaaaggucgggucgccC.....               |                   |                                               | 1 | 1 | seq |
| .....Nuuaaaggucgggucgccu.....               |                   |                                               | 3 | 1 | seq |
| .....Uuaaaggucgggucgccu.....                |                   |                                               | 2 | 1 | seq |
| .....auuaaaggucgggucgccu.....               |                   |                                               | 2 | 0 | seq |
| .....aAuaaaggucgggucgccua.....              |                   |                                               | 1 | 1 | seq |
| .....Uuaaaggucgggucgccua.....               |                   |                                               | 1 | 1 | seq |
| .....Auaaaggucgggucgccu.....                |                   |                                               | 9 | 1 | seq |
| .....uaaCggucgggucgccu.....                 |                   |                                               | 1 | 1 | seq |
| .....uaaaggucgggAaccgccu.....               |                   |                                               | 4 | 1 | seq |
| .....uaaaggucgggucggGcu.....                |                   |                                               | 2 | 1 | seq |
| .....uaaaggucgggucUccu.....                 |                   |                                               | 1 | 1 | seq |
| .....uaGaggucgggucgccu.....                 |                   |                                               | 6 | 1 | seq |

# Mature Star

|                                                 |                                               |                        |      |   |     |
|-------------------------------------------------|-----------------------------------------------|------------------------|------|---|-----|
| aaguugnuuguaaguuaaaaaucucgcaguuuggaucuuugggucua | uaaaggucggucggccuacuuuggugugugcaccugcccuuccgc | cccuuuugucggugcgugccua |      |   |     |
| .....uaaagCucggucggccu.....                     |                                               |                        | 1    | 1 | seq |
| .....uaUaggucggucggccu.....                     |                                               |                        | 2    | 1 | seq |
| .....uaaaggucggucggccu.....                     |                                               |                        | 2990 | 0 | seq |
| .....uaaaAgucggucggccu.....                     |                                               |                        | 2    | 1 | seq |
| .....uaaaUgucggucggccu.....                     |                                               |                        | 2    | 1 | seq |
| .....Gaaaggucggucggccu.....                     |                                               |                        | 8    | 1 | seq |
| .....uaaaggucggucggccC.....                     |                                               |                        | 530  | 1 | seq |
| .....uaaaggAcggucggccu.....                     |                                               |                        | 1    | 1 | seq |
| .....uaaaggucgAuccgccu.....                     |                                               |                        | 1    | 1 | seq |
| .....uaCaggucggucggccu.....                     |                                               |                        | 1    | 1 | seq |
| .....uaaaggucggCcgcgccu.....                    |                                               |                        | 9    | 1 | seq |
| .....Naaaggucggucggccu.....                     |                                               |                        | 1    | 1 | seq |
| .....uaaaggucggucggccG.....                     |                                               |                        | 151  | 1 | seq |
| .....uaaGggucggucggccu.....                     |                                               |                        | 11   | 1 | seq |
| .....uaaaggucggugGcgccu.....                    |                                               |                        | 1    | 1 | seq |
| .....Caaaggucggucggccu.....                     |                                               |                        | 7    | 1 | seq |
| .....uaaUggucggucggccu.....                     |                                               |                        | 2    | 1 | seq |
| .....uaaaggucggucggcAu.....                     |                                               |                        | 7    | 1 | seq |
| .....uaaaggucgguUcgccu.....                     |                                               |                        | 2    | 1 | seq |
| .....uaaaggucggucggAcu.....                     |                                               |                        | 4    | 1 | seq |
| .....uaaaggucgguaAcgccu.....                    |                                               |                        | 1    | 1 | seq |
| .....uaaagguaAggucggccu.....                    |                                               |                        | 1    | 1 | seq |
| .....uaaaggucgguccgccA.....                     |                                               |                        | 205  | 1 | seq |
| .....uaaaggucUgucggccu.....                     |                                               |                        | 2    | 1 | seq |
| .....uGaaggucggucggccu.....                     |                                               |                        | 4    | 1 | seq |
| .....uaaaggucggCcgcgccua.....                   |                                               |                        | 2    | 1 | seq |
| .....uaaaggAcggucggccua.....                    |                                               |                        | 1    | 1 | seq |
| .....uGaaggucggucggccua.....                    |                                               |                        | 2    | 1 | seq |
| .....uaaaggucgguccgccuC.....                    |                                               |                        | 2    | 1 | seq |
| .....uaaaggucgguccUccua.....                    |                                               |                        | 1    | 1 | seq |
| .....uaaaggucgguccgccCa.....                    |                                               |                        | 11   | 1 | seq |
| .....Gaaaggucggucggccua.....                    |                                               |                        | 3    | 1 | seq |
| .....uaaaggucggGccgcgccua.....                  |                                               |                        | 1    | 1 | seq |
| .....uaaaggucggucggccuU.....                    |                                               |                        | 5    | 1 | seq |
| .....uaaaggGcgucggccua.....                     |                                               |                        | 1    | 1 | seq |
| .....uaGaggucggucggccua.....                    |                                               |                        | 2    | 1 | seq |
| .....uaaaggucgguccgccua.....                    |                                               |                        | 880  | 0 | seq |
| .....uaaaggucgguccgcAu.....                     |                                               |                        | 1    | 1 | seq |
| .....uaCaggucggucggccua.....                    |                                               |                        | 1    | 1 | seq |
| .....uaaGggucggucggccua.....                    |                                               |                        | 3    | 1 | seq |
| .....Caaaggucgguccgccua.....                    |                                               |                        | 2    | 1 | seq |
| .....Aaaaggucggucggccua.....                    |                                               |                        | 1    | 1 | seq |
| .....uaaaggucgguccgccuG.....                    |                                               |                        | 14   | 1 | seq |
| .....uUaaggucggucggccua.....                    |                                               |                        | 1    | 1 | seq |
| .....uaaaggucgguccgcAu.....                     |                                               |                        | 1    | 1 | seq |
| .....uaaaggucgguccgccGa.....                    |                                               |                        | 2    | 1 | seq |
| .....uaaaggucgAuccgccua.....                    |                                               |                        | 1    | 1 | seq |
| .....uaaaggucgguccgcgccuac.....                 |                                               |                        | 8    | 0 | seq |
| .....uaaaggucgguccgcgccuaA.....                 |                                               |                        | 2    | 1 | seq |
| .....uaaGggucggucggccuac.....                   |                                               |                        | 1    | 1 | seq |
| .....uaaaggucgguccgcgccuU.....                  |                                               |                        | 74   | 1 | seq |
| .....uaaaggucgguccgcgccuCc.....                 |                                               |                        | 1    | 1 | seq |
| .....uaaaggucgguccgcgccuaG.....                 |                                               |                        | 1    | 1 | seq |
| .....uaaaggucgguccgcgccuacu.....                |                                               |                        | 2    | 0 | seq |
| .....uaaaggucgguccgcgccuacA.....                |                                               |                        | 1    | 1 | seq |
| .....uaaaggucgguccgcgccuaUu.....                |                                               |                        | 286  | 1 | seq |
| .....uaaaggucgguccgcgccuaAu.....                |                                               |                        | 1    | 1 | seq |
| .....uaaaggucgguccgcgccuaUuu.....               |                                               |                        | 3    | 1 | seq |
| .....uaaaggucgguccgcgccuaUuug.....              |                                               |                        | 3    | 1 | seq |
| .....uaaaggucgguccgcgccuaUuugg.....             |                                               |                        | 1    | 1 | seq |
| .....uaaaggucgguccgcgccuaUuuggu.....            |                                               |                        | 1    | 1 | seq |
| .....uaaaggucgguccgcgccuaUuuggug.....           |                                               |                        | 2    | 1 | seq |
| .....uaaaggucgguccgcgccuaUuuggugug.....         |                                               |                        | 1    | 1 | seq |
| .....uaaaggucgguccgcgccuaUuuggugugc.....        |                                               |                        | 3    | 1 | seq |
| .....aaaggucgAuccgccua.....                     |                                               |                        | 1    | 1 | seq |
| .....aaaggucggugGcgccua.....                    |                                               |                        | 2    | 1 | seq |
| .....aaaggucgguccgcgccuC.....                   |                                               |                        | 1    | 1 | seq |
| .....Naaggucgguccgcgccua.....                   |                                               |                        | 3    | 1 | seq |
| .....aaaggucgguccgcgccua.....                   |                                               |                        | 577  | 0 | seq |
| .....aaaAgucgguccgcgccua.....                   |                                               |                        | 1    | 1 | seq |

Mature Star

[illegible]



# Mature Star

aaguuguuguaguuaaaaaaucucgcaguggaucuuugggucuaaaaggucgguccgccuacuuuggugcaccugcccuuccgccccuuugucgguggcgugcuccua

|                                      |     |   |     |
|--------------------------------------|-----|---|-----|
| .....Uuuuggugugcaccugcccuuccg.....   | 1   | 1 | seq |
| .....uAgggugugcaccugccc.....         | 1   | 1 | seq |
| .....uuggugugcaccugccU.....          | 3   | 1 | seq |
| .....uuggugugcaccugccc.....          | 9   | 0 | seq |
| .....uuCgugugcaccugccc.....          | 2   | 1 | seq |
| .....uuggugugcaccugcccu.....         | 2   | 0 | seq |
| .....uuggugugcaccugcccuu.....        | 1   | 0 | seq |
| .....uAgggugugcaccugcccuuc.....      | 2   | 1 | seq |
| .....uuggugugcaccugcccuuc.....       | 1   | 0 | seq |
| .....uuCgugugcaccugcccuuc.....       | 1   | 1 | seq |
| .....uuggugugcaccugcccuucc.....      | 1   | 0 | seq |
| .....uCggugugcaccugcccuuccgc.....    | 15  | 1 | seq |
| .....uCggugugcaccugcccuuccgcc.....   | 1   | 1 | seq |
| .....uCggugugcaccugcccuuccgcccc..... | 2   | 1 | seq |
| .....uCggugugcaccugcccuuccgcccu..... | 1   | 1 | seq |
| .....uggugugcaccugcccu.....          | 2   | 0 | seq |
| .....Agggugugcaccugcccu.....         | 1   | 1 | seq |
| .....uuggugugcaccugcccA.....         | 1   | 1 | seq |
| .....Nggugugcaccugcccu.....          | 1   | 1 | seq |
| .....uCgugugcaccugcccu.....          | 1   | 1 | seq |
| .....Agggugugcaccugcccuu.....        | 3   | 1 | seq |
| .....uggugugcaccugcccuu.....         | 3   | 0 | seq |
| .....uggugugcaccugcccuC.....         | 1   | 1 | seq |
| .....Nggugugcaccugcccuuc.....        | 1   | 1 | seq |
| .....uggugugcaccCgcccuc.....         | 1   | 1 | seq |
| .....Agggugugcaccugcccuuc.....       | 2   | 1 | seq |
| .....Gggugugcaccugcccuuc.....        | 2   | 1 | seq |
| .....uggugugcaccugcccuucc.....       | 1   | 0 | seq |
| .....Agggugugcaccugcccuucc.....      | 1   | 1 | seq |
| .....Gggugugcaccugcccuucc.....       | 1   | 1 | seq |
| .....Agggugugcaccugcccuuccg.....     | 1   | 1 | seq |
| .....uggugugcaccugcccuuccg.....      | 1   | 0 | seq |
| .....Cggugugcaccugcccuuccgc.....     | 29  | 1 | seq |
| .....Cggugugcaccugcccuuccgcc.....    | 4   | 1 | seq |
| .....Cggugugcaccugcccuuccgcccc.....  | 2   | 1 | seq |
| .....Cggugugcaccugcccuuccgcccu.....  | 1   | 1 | seq |
| .....ggugugcaccugcccuu.....          | 183 | 0 | seq |
| .....Cgugugcaccugcccuu.....          | 1   | 1 | seq |
| .....ggugugcaccugcccuA.....          | 7   | 1 | seq |
| .....gguAugcaccugcccuu.....          | 1   | 1 | seq |
| .....ggugugcaccugcccuC.....          | 21  | 1 | seq |
| .....ggugugcaccugcccAu.....          | 1   | 1 | seq |
| .....ggugugcaccugcccuG.....          | 4   | 1 | seq |
| .....ggugugcaccugcccCu.....          | 1   | 1 | seq |
| .....ggugugcaccugcccuuc.....         | 92  | 0 | seq |
| .....ggugugcaccCgcccuc.....          | 1   | 1 | seq |
| .....ggugugUaccugcccuuc.....         | 1   | 1 | seq |
| .....ggugugcaccugcccuucc.....        | 55  | 0 | seq |
| .....ggugugcaccugcccCuucc.....       | 2   | 1 | seq |
| .....ggugugcaccugcccuucA.....        | 3   | 1 | seq |
| .....ggugugcaccugccUuucc.....        | 1   | 1 | seq |
| .....ggCgugcaccugcccuuccg.....       | 1   | 1 | seq |
| .....ggugugcGccugcccuuccg.....       | 1   | 1 | seq |
| .....ggugugcaccugcccuAacc.....       | 1   | 1 | seq |
| .....ggugugcaccugcccuuccU.....       | 3   | 1 | seq |
| .....ggugugUaccugcccuuccg.....       | 2   | 1 | seq |
| .....ggugugcaccugcGcuuccg.....       | 1   | 1 | seq |
| .....ggAugcaccugcccuuccg.....        | 1   | 1 | seq |
| .....ggGgugcaccugcccuuccg.....       | 1   | 1 | seq |
| .....Ugugugcaccugcccuuccg.....       | 2   | 1 | seq |
| .....Agugugcaccugcccuuccg.....       | 2   | 1 | seq |
| .....Cgugugcaccugcccuuccg.....       | 1   | 1 | seq |
| .....ggugugcaccCgcccuccg.....        | 1   | 1 | seq |
| .....ggugugcaccugcccCuuccg.....      | 2   | 1 | seq |
| .....ggugugcaccugcccuGccg.....       | 1   | 1 | seq |
| .....ggugugcaccugcccuuccC.....       | 2   | 1 | seq |
| .....ggugugcaccugcccuuccg.....       | 281 | 0 | seq |
| .....ggugugcaccugcccuuccgG.....      | 8   | 1 | seq |
| .....ggugugcaccugcccuuccgc.....      | 28  | 0 | seq |
| .....ggugugcaccugcccuuccgA.....      | 1   | 1 | seq |

# Mature Star

aaguuguuguaguuaaaaaaucgcaguguggaucuuugggucuaaaaggugcguccgccuacuuuggugugcaccugcccuuccgccccuuugucggugcgugcuccua

|                                       |     |   |     |
|---------------------------------------|-----|---|-----|
| .....ggugugcaccugcccuuccgGc.....      | 1   | 1 | seq |
| .....ggugugcaccugcccuuccgUccu.....    | 182 | 1 | seq |
| .....ggugugcaccugcccuucccgcccC.....   | 1   | 1 | seq |
| .....ggugugcaccugcccuucccgcccCu.....  | 5   | 1 | seq |
| .....ggugugcaccugcccuucccgUccuu.....  | 1   | 1 | seq |
| .....ggugugcaccugcccuucccgcccCuu..... | 2   | 1 | seq |
| .....gCgugcaccugcccuucc.....          | 1   | 1 | seq |
| .....gugCgcaccugcccuucc.....          | 2   | 1 | seq |
| .....gugugcaccugcccuuccC.....         | 2   | 1 | seq |
| .....Uugugcaccugcccuucc.....          | 1   | 1 | seq |
| .....gugugcaccAgcccuucc.....          | 1   | 1 | seq |
| .....gugugcaccugcccuucc.....          | 146 | 0 | seq |
| .....gugugUaccugcccuucc.....          | 1   | 1 | seq |
| .....gugugcaccugcccuuccG.....         | 1   | 1 | seq |
| .....gugCgcaccugcccuucc.....          | 1   | 1 | seq |
| .....gugugcaccugcccuucc.....          | 261 | 0 | seq |
| .....gugugcaccugcccuuccA.....         | 15  | 1 | seq |
| .....gugugcacUugcccuucc.....          | 1   | 1 | seq |
| .....gugugcaccCgcccuucc.....          | 1   | 1 | seq |
| .....guAugcaccugcccuucc.....          | 1   | 1 | seq |
| .....Uugugcaccugcccuucc.....          | 1   | 1 | seq |
| .....gugugcGccugcccuucc.....          | 1   | 1 | seq |
| .....gugugcaccugcccCucc.....          | 3   | 1 | seq |
| .....gugugcaUcugcccuuccg.....         | 3   | 1 | seq |
| .....gugugcGccugcccuuccg.....         | 1   | 1 | seq |
| .....gCgugcaccugcccuuccg.....         | 3   | 1 | seq |
| .....gugugcaccugUccuuccg.....         | 1   | 1 | seq |
| .....guAugcaccugcccuuccg.....         | 1   | 1 | seq |
| .....gugugAaccugcccuuccg.....         | 1   | 1 | seq |
| .....gugugcaccugcAcuuccg.....         | 1   | 1 | seq |
| .....gugugcaccugcccuuccAg.....        | 2   | 1 | seq |
| .....gugugcaccugcccuuccg.....         | 547 | 0 | seq |
| .....Nugugcaccugcccuuccg.....         | 1   | 1 | seq |
| .....gAgugcaccugcccuuccg.....         | 1   | 1 | seq |
| .....gugugcaccugccAcuuccg.....        | 1   | 1 | seq |
| .....gugugcaccugcccuuccC.....         | 3   | 1 | seq |
| .....gugugcaccugcccuGccg.....         | 2   | 1 | seq |
| .....gugugcaccCgcccuuccg.....         | 2   | 1 | seq |
| .....gugugcaccugcccuuccU.....         | 2   | 1 | seq |
| .....gugugcaccugcccuuccgA.....        | 7   | 1 | seq |
| .....gugugcaccugcccuuccgG.....        | 10  | 1 | seq |
| .....gugugcaccugcccuucccgC.....       | 44  | 0 | seq |
| .....gugugcaccugcccuucccgCG.....      | 1   | 1 | seq |
| .....gugugcaccugcccuucccgcc.....      | 5   | 0 | seq |
| .....gugugcaccugcccuucccgccc.....     | 2   | 0 | seq |
| .....gugugcaccugcccuucccgccA.....     | 1   | 1 | seq |
| .....gugugcaccugcccuucccgccU.....     | 1   | 1 | seq |
| .....gugugcaccugcccuucccgUccu.....    | 123 | 1 | seq |
| .....gugugcaccugcccuucccgcccC.....    | 2   | 1 | seq |
| .....gugugcaccugcccuucccgUccuu.....   | 2   | 1 | seq |
| .....gugugcaccugcccuucccgcccCuu.....  | 2   | 1 | seq |
| .....gugugcaccugcccuucccgcccCuuu..... | 2   | 1 | seq |
| .....ugCgcaccugcccuucc.....           | 1   | 1 | seq |
| .....ugugcaccugcccuucc.....           | 268 | 0 | seq |
| .....ugugcaccugcccuuccA.....          | 16  | 1 | seq |
| .....ugugcaccugcccuCcc.....           | 1   | 1 | seq |
| .....ugugcaccugcUcuucc.....           | 1   | 1 | seq |
| .....ugugcaUcugcccuucc.....           | 2   | 1 | seq |
| .....ugugcaccugcccCucc.....           | 5   | 1 | seq |
| .....Cgugcaccugcccuucc.....           | 2   | 1 | seq |
| .....Ngugcaccugcccuucc.....           | 1   | 1 | seq |
| .....ugugcUccugcccuuccg.....          | 1   | 1 | seq |
| .....ugAgcaccugcccuuccg.....          | 2   | 1 | seq |
| .....ugugcaccugUccuuccg.....          | 2   | 1 | seq |
| .....Ggugcaccugcccuuccg.....          | 1   | 1 | seq |
| .....ugugcacUugcccuuccg.....          | 1   | 1 | seq |
| .....ugGgcaccugcccuuccg.....          | 1   | 1 | seq |
| .....ugCgcaccugcccuuccg.....          | 2   | 1 | seq |
| .....ugugcaccugcccCuccg.....          | 1   | 1 | seq |
| .....ugugcaccugcccuuccC.....          | 3   | 1 | seq |

# Mature Star

aaguuguuguaguuaaaaaaucucgaguggaucuuugggucuaaaaggucgguccgcgcuacuuuggugugcaccugcccuuccgccccuuugucgguggcgugcuccua

|                                     |     |   |     |
|-------------------------------------|-----|---|-----|
| .....ugugcaccGgccccuuccg.....       | 1   | 1 | seq |
| .....ugugUaccugcccuuccg.....        | 1   | 1 | seq |
| .....uAugcaccugcccuuccg.....        | 2   | 1 | seq |
| .....ugugcaccugcccuCccg.....        | 2   | 1 | seq |
| .....ugugcGccugcccuuccg.....        | 3   | 1 | seq |
| .....ugugcaccugcccuuccAg.....       | 3   | 1 | seq |
| .....ugugcaccugcUcuuccg.....        | 1   | 1 | seq |
| .....ugugcaccCGcccuuccg.....        | 1   | 1 | seq |
| .....ugugcaccugcccuuccg.....        | 679 | 0 | seq |
| .....ugugcaccugcccuuccgG.....       | 9   | 1 | seq |
| .....ugugcaccugcccuuccgc.....       | 47  | 0 | seq |
| .....Augcaccugcccuuccgc.....        | 1   | 1 | seq |
| .....ugugcaAcugcccuuccgc.....       | 1   | 1 | seq |
| .....ugugcaccugcccuuccgA.....       | 6   | 1 | seq |
| .....ugugcaccugcccuuccUcc.....      | 1   | 1 | seq |
| .....ugugcaccugcccuuccgcg.....      | 3   | 0 | seq |
| .....ugugcaccugcccuuccgcgg.....     | 2   | 0 | seq |
| .....ugugcaccugcccuuccgUccu.....    | 145 | 1 | seq |
| .....ugugcaccugcccuuccgcggC.....    | 1   | 1 | seq |
| .....ugugcaccugcccuuccUccuu.....    | 1   | 1 | seq |
| .....ugugcaccugcccuuccgcggCuu.....  | 1   | 1 | seq |
| .....ugugcaccugcccuuccgcggCuu.....  | 1   | 1 | seq |
| .....ugugcaccugcccuuccgcggCuu.....  | 2   | 1 | seq |
| .....ugugcaccugcccuuccgcggCuu.....  | 1   | 1 | seq |
| .....ugugcaccugcccuuccgcggCuu.....  | 2   | 1 | seq |
| .....gugcaccugcccuuccU.....         | 8   | 1 | seq |
| .....gugcaccugcccgAuccg.....        | 1   | 1 | seq |
| .....gugcaccugcccuuccC.....         | 2   | 1 | seq |
| .....Augcaccugcccuuccg.....         | 1   | 1 | seq |
| .....gugcaccugcccuuccAg.....        | 2   | 1 | seq |
| .....Cugcaccugcccuuccg.....         | 1   | 1 | seq |
| .....gugcGccugcccuuccg.....         | 2   | 1 | seq |
| .....gugcaccugcccgGuccg.....        | 1   | 1 | seq |
| .....gGgcaccugcccuuccg.....         | 1   | 1 | seq |
| .....gugcaccugcccuCccg.....         | 1   | 1 | seq |
| .....Uugcaccugcccuuccg.....         | 1   | 1 | seq |
| .....gugcaccCGcccuuccg.....         | 3   | 1 | seq |
| .....gCgcaccugcccuuccg.....         | 1   | 1 | seq |
| .....gugcaccAgcccuuccg.....         | 1   | 1 | seq |
| .....gugcaccugcccuuccg.....         | 550 | 0 | seq |
| .....gugcaUcugcccuuccg.....         | 1   | 1 | seq |
| .....gugcaccugcccuuccgc.....        | 41  | 0 | seq |
| .....gugcaccugcccuuccgG.....        | 5   | 1 | seq |
| .....gugcaccugGccuuccgc.....        | 1   | 1 | seq |
| .....gugcaccugcccuuccgA.....        | 2   | 1 | seq |
| .....gugcaccugcccuuccgGc.....       | 1   | 1 | seq |
| .....gugcaccugcccgGuccgC.....       | 1   | 1 | seq |
| .....gugcaccugcccuuccgcggC.....     | 2   | 0 | seq |
| .....gugcaccugcccuuccgcggCA.....    | 1   | 1 | seq |
| .....gugcaccugcccuuccgcggC.....     | 2   | 1 | seq |
| .....gugcaccugcccuuccgcggUccu.....  | 144 | 1 | seq |
| .....gugcaccugcccuuccgAccu.....     | 1   | 1 | seq |
| .....gugcaccugcccuuccgcggCuu.....   | 2   | 1 | seq |
| .....gugcaccugcccuuccgcggUccuu..... | 3   | 1 | seq |
| .....gugcaccugcccuuccgcggCuu.....   | 4   | 1 | seq |
| .....gugcaccugcccuuccgcggCuu.....   | 2   | 1 | seq |
| .....ugcaccugcccuuccgc.....         | 36  | 0 | seq |
| .....ugcaccugcccuuccgG.....         | 9   | 1 | seq |
| .....ugcaccugcccuuccgA.....         | 5   | 1 | seq |
| .....Agcaccugcccuuccgc.....         | 1   | 1 | seq |
| .....ugcaccugcccuuccgGc.....        | 4   | 1 | seq |
| .....ugcaccugcccuuccgcgA.....       | 1   | 1 | seq |
| .....ugcaccugcccuuccgcgC.....       | 2   | 0 | seq |
| .....ugcaccugcccuuccgcgG.....       | 1   | 1 | seq |
| .....ugcaccugcccuuccgcgAcc.....     | 1   | 1 | seq |
| .....ugcaccugcccuuccgcggC.....      | 4   | 0 | seq |
| .....ugcaccugcccuuccgcggC.....      | 1   | 1 | seq |
| .....ugcaccugcccuuccgcggUccu.....   | 134 | 1 | seq |
| .....ugcaccugcccuuccgcggC.....      | 1   | 0 | seq |
| .....ugcaccugcccuuccgcggC.....      | 3   | 1 | seq |

# Mature Star

|                                                                                                             |     |   |     |
|-------------------------------------------------------------------------------------------------------------|-----|---|-----|
| aaguuguuguaguuaaaaaaucucgcaguggaucuuugggucuaaaaggucgguccgccuacuuuggugcaccugcccuucgccccuuugucgguggcgugcuccua |     |   |     |
| .....ugcaccugcccuucgccccCu.....                                                                             | 6   | 1 | seq |
| .....ugcaccugcccuucgccccCuu.....                                                                            | 3   | 1 | seq |
| .....gcaccugcccuucgccc.....                                                                                 | 3   | 0 | seq |
| .....gcaccugcccuucgAc.....                                                                                  | 1   | 1 | seq |
| .....gcaccugcccuucgcccU.....                                                                                | 1   | 1 | seq |
| .....gcaccugcccuucgccc.....                                                                                 | 1   | 0 | seq |
| .....gcaccugcccuucgccccC.....                                                                               | 4   | 1 | seq |
| .....gcaccugcccuucgUccu.....                                                                                | 180 | 1 | seq |
| .....gcaccugcccuucgGccu.....                                                                                | 1   | 1 | seq |
| .....gcaccugcccuucgUccuu.....                                                                               | 1   | 1 | seq |
| .....gcaccugcccuucgccccCu.....                                                                              | 7   | 1 | seq |
| .....gcaccugcccuucgccccCuu.....                                                                             | 1   | 1 | seq |
| .....gcaccugcccuucgccccCuuu.....                                                                            | 2   | 1 | seq |
| .....caccugcccuucgcccA.....                                                                                 | 1   | 1 | seq |
| .....caccugcccuucgcccG.....                                                                                 | 1   | 1 | seq |
| .....caccugcccuucgGcc.....                                                                                  | 1   | 1 | seq |
| .....caccugcccuucgAcc.....                                                                                  | 1   | 1 | seq |
| .....caccugcccuucgccc.....                                                                                  | 6   | 0 | seq |
| .....caccugcccuucgUccu.....                                                                                 | 601 | 1 | seq |
| .....caccugcccuucgcccc.....                                                                                 | 2   | 0 | seq |
| .....caccugcccuucgccccC.....                                                                                | 11  | 1 | seq |
| .....caccugcccuucgUccuu.....                                                                                | 7   | 1 | seq |
| .....caccugcccuucgccccCu.....                                                                               | 13  | 1 | seq |
| .....caccugcccuucgccccCuu.....                                                                              | 15  | 1 | seq |
| .....caccugcccuucgccccCuuu.....                                                                             | 3   | 1 | seq |
| .....accugcccuucgccccC.....                                                                                 | 1   | 1 | seq |
| .....accugcccuucgUccu.....                                                                                  | 213 | 1 | seq |
| .....accugcccuucgUccuu.....                                                                                 | 5   | 1 | seq |
| .....accugcccuucgccccCu.....                                                                                | 7   | 1 | seq |
| .....accugcccuucgccccCuu.....                                                                               | 3   | 1 | seq |
| .....accugcccuucgUccuuuu.....                                                                               | 2   | 1 | seq |
| .....ccugcccuucgUccuu.....                                                                                  | 6   | 1 | seq |
| .....ccugcccuucgccccCu.....                                                                                 | 21  | 1 | seq |
| .....ccugcccuucgccccCuu.....                                                                                | 18  | 1 | seq |
| .....ccugcccuucgUccuuu.....                                                                                 | 2   | 1 | seq |
| .....ccugcccuucgccccCuuu.....                                                                               | 4   | 1 | seq |
| .....ccugcccuucgUccuuuu.....                                                                                | 1   | 1 | seq |
| .....cugcccuucgccccCuu.....                                                                                 | 9   | 1 | seq |
| .....cugcccuucgUccuuu.....                                                                                  | 3   | 1 | seq |
| .....cugcccuucgccccCuuu.....                                                                                | 8   | 1 | seq |
| .....ugcccuucgUccuuuu.....                                                                                  | 2   | 1 | seq |
| .....ugcccuucgccccCuuu.....                                                                                 | 7   | 1 | seq |
| .....ccuuuugCcggggCG.....                                                                                   | 3   | 1 | seq |

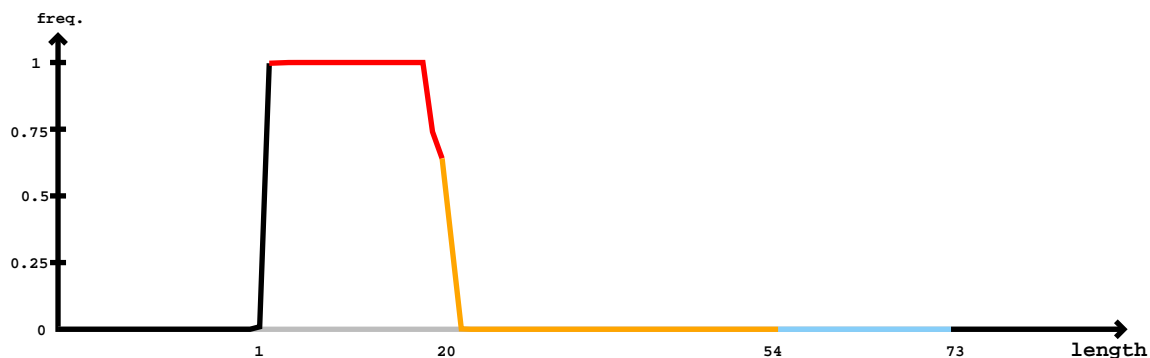

Star

| 5'-                                                                                          | 3'-               | exp |        |
|----------------------------------------------------------------------------------------------|-------------------|-----|--------|
| auuccuugcaagguugccuacugccugaaaguuagucugccuucuuugggcaucuguuagaagcuucggcgucuggcuuuauucuggcugua | cuaccugcuuuuuucca |     |        |
| .....(((.(((....(((.(((.(....(.(((.((((....(((.(((....)))..)))..)))..)))..)))..)))..)))..... | reads             | mm  | sample |
| .....acugccugaaUuguagu.....                                                                  | 1                 | 1   | seq    |
| .....Ucugccugaaauguaguc.....                                                                 | 1                 | 1   | seq    |
| .....acugccugaaUuguagu.....                                                                  | 68                | 1   | seq    |
| .....acugccugaaCuguaguc.....                                                                 | 1                 | 1   | seq    |
| .....acugccugaaUuguaguc.....                                                                 | 72                | 1   | seq    |
| .....Gcugccugaaauguaguc.....                                                                 | 12                | 1   | seq    |
| .....Ucugccugaaauguaguc.....                                                                 | 1                 | 1   | seq    |
| .....acugccugaaUuguagucug.....                                                               | 783               | 1   | seq    |
| .....acugccugaaauguagucug.....                                                               | 1                 | 0   | seq    |
| .....Gcugccugaaauguagucug.....                                                               | 170               | 1   | seq    |
| .....acugccugaaUuguagucugu.....                                                              | 218               | 1   | seq    |
| .....Gcugccugaaauguagucugu.....                                                              | 37                | 1   | seq    |
| .....acugccugaaUuguagucugug.....                                                             | 4                 | 1   | seq    |
| .....cugccugaaCuguaguc.....                                                                  | 80                | 1   | seq    |
| .....cugccugaaauguaguU.....                                                                  | 1                 | 1   | seq    |
| .....cugccugaaGuguaguc.....                                                                  | 5                 | 1   | seq    |
| .....cugccugaaUuguaguc.....                                                                  | 38119             | 1   | seq    |
| .....cugccugaaauguaguc.....                                                                  | 20                | 0   | seq    |
| .....cugccugaaUuguaguc.....                                                                  | 14582             | 1   | seq    |
| .....cugccugaaGuguaguc.....                                                                  | 3                 | 1   | seq    |
| .....cugccugaaauguaguc.....                                                                  | 5                 | 0   | seq    |
| .....cugccugaaauguagucC.....                                                                 | 1                 | 1   | seq    |
| .....cugccugaaCuguaguc.....                                                                  | 27                | 1   | seq    |
| .....cugccugaaUuguaguc.....                                                                  | 1                 | 1   | seq    |
| .....cugccugaaGuguagucug.....                                                                | 10                | 1   | seq    |
| .....cugccugaaUuguagucug.....                                                                | 83980             | 1   | seq    |
| .....cugccugaaauguagucug.....                                                                | 29                | 0   | seq    |
| .....cugccugaaauguagucuA.....                                                                | 2                 | 1   | seq    |
| .....cugccugaaaCuguagucug.....                                                               | 1                 | 1   | seq    |
| .....cugccugaaCuguagucug.....                                                                | 151               | 1   | seq    |
| .....cugccugaaUuguagucugu.....                                                               | 8578              | 1   | seq    |
| .....cugccugaaCuguagucugu.....                                                               | 16                | 1   | seq    |
| .....cugccugaaauguagucugu.....                                                               | 3                 | 0   | seq    |
| .....cugccugaaauguagucuguaA.....                                                             | 2                 | 1   | seq    |

## Mature

## Star

|                                                                                                                |     |   |     |
|----------------------------------------------------------------------------------------------------------------|-----|---|-----|
| auuccuugcaagguugccuacugccugaaauguagucugugccuucugggcaucuguugaagcuucggcgcuaggcuucuaucugggcugua cuaccugcuuauuucca |     |   |     |
| .....cugccugaaCuguagucugug.....                                                                                | 1   | 1 | seq |
| .....cugccugaaUuguagucugug.....                                                                                | 102 | 1 | seq |
| .....cugccugaaUuguagucugugc.....                                                                               | 2   | 1 | seq |
| .....ugccugaaCuguagucu.....                                                                                    | 33  | 1 | seq |
| .....ugccugaaauguagucu.....                                                                                    | 6   | 0 | seq |
| .....ugccugaaauguagucG.....                                                                                    | 1   | 1 | seq |
| .....ugccugaaauguagucC.....                                                                                    | 2   | 1 | seq |
| .....ugccugaaauguagucug.....                                                                                   | 14  | 0 | seq |
| .....ugccugaaCuguagucug.....                                                                                   | 66  | 1 | seq |
| .....ugccugaaauguagucuA.....                                                                                   | 1   | 1 | seq |
| .....ugccugaaCuguagucugu.....                                                                                  | 8   | 1 | seq |
| .....ugccugaaauguagucugu.....                                                                                  | 3   | 0 | seq |
| .....ugccugaaUuguagucugug.....                                                                                 | 70  | 1 | seq |
| .....ugccugaaauguagucuguA.....                                                                                 | 2   | 1 | seq |
| .....gccugaaauguagucAg.....                                                                                    | 1   | 1 | seq |
| .....gccugaaaCguagucug.....                                                                                    | 1   | 1 | seq |
| .....gccugaaauguagucuU.....                                                                                    | 1   | 1 | seq |
| .....gccugaaauguagucug.....                                                                                    | 21  | 0 | seq |
| .....gccugaaCuguagucug.....                                                                                    | 133 | 1 | seq |
| .....gccugaaauguagucugu.....                                                                                   | 1   | 0 | seq |
| .....gccugaaCuguagucugu.....                                                                                   | 28  | 1 | seq |
| .....gccugaaCuguagucugug.....                                                                                  | 2   | 1 | seq |
| .....gccugaaUuguagucugugc.....                                                                                 | 1   | 1 | seq |
| .....gccugaaUuguagucugugcc.....                                                                                | 1   | 1 | seq |
| .....ccugaaCuguagucugu.....                                                                                    | 5   | 1 | seq |
| .....ccugaaauguagucugu.....                                                                                    | 1   | 0 | seq |
| .....ccugaaCuguagucugug.....                                                                                   | 1   | 1 | seq |
| .....ccugaaUuguagucugugc.....                                                                                  | 1   | 1 | seq |
| .....cugaaUuguagucugugc.....                                                                                   | 1   | 1 | seq |
| .....gaaUuguagucugugccu.....                                                                                   | 1   | 1 | seq |

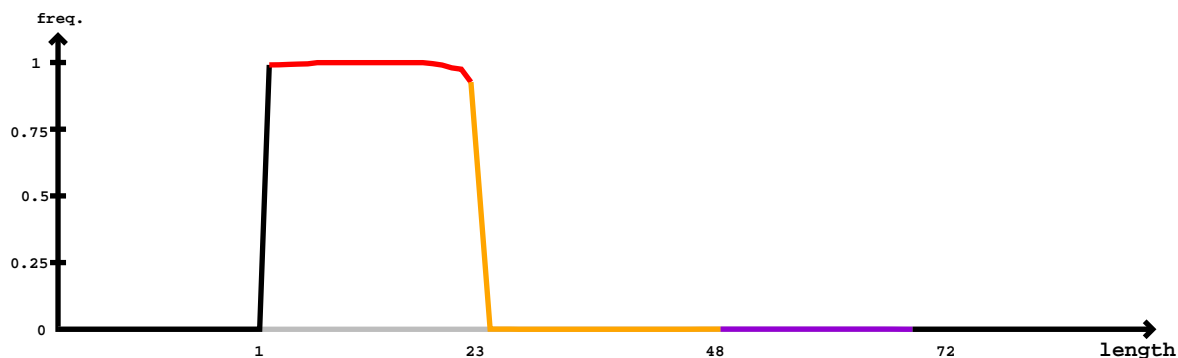

Star

## Mature

## Star

|                                                                                                                      |       |   |     |
|----------------------------------------------------------------------------------------------------------------------|-------|---|-----|
| agagguuuuggaaggugauccuaaacaucuggggccacgaugguuuaauuguucaucguguuuuuaucauaaaccauggugccccagagauaagagcacccuucgccuucgugccu |       |   |     |
| . . . . . Gaacaucuggggccacgaugguu . . . . .                                                                          | 2     | 1 | seq |
| . . . . . uaacaucuggggccacgauggu . . . . .                                                                           | 1     | 1 | seq |
| . . . . . uaacGucuggggccacgaugguu . . . . .                                                                          | 84554 | 1 | seq |
| . . . . . uaacaucGggggccacgaugguu . . . . .                                                                          | 1     | 1 | seq |
| . . . . . uaacaucCggggccacgaugguu . . . . .                                                                          | 1     | 1 | seq |
| . . . . . Aaacaucuggggccacgaugguu . . . . .                                                                          | 2     | 1 | seq |
| . . . . . uaacaucuggggccacgaugguuu . . . . .                                                                         | 2     | 0 | seq |
| . . . . . uUacaucuggggccacgaugguuu . . . . .                                                                         | 3     | 1 | seq |
| . . . . . Naacaucuggggccacgaugguuu . . . . .                                                                         | 1     | 1 | seq |
| . . . . . uaacGucuggggccacgaugguuu . . . . .                                                                         | 912   | 1 | seq |
| . . . . . Caacaucuggggccacgaugguuu . . . . .                                                                         | 28    | 1 | seq |
| . . . . . uaacGucuggggccacgaugguuua . . . . .                                                                        | 6     | 1 | seq |
| . . . . . uaacGucuggggccacgaugguuuau . . . . .                                                                       | 1     | 1 | seq |
| . . . . . .aacGucuggggccacgau . . . . .                                                                              | 1     | 1 | seq |
| . . . . . .aacGucuggggccacgaug . . . . .                                                                             | 3     | 1 | seq |
| . . . . . .aacGucuggggccacgaugg . . . . .                                                                            | 3     | 1 | seq |
| . . . . . .aacaucuggggccacgauggC . . . . .                                                                           | 1     | 1 | seq |
| . . . . . .aacaucuggggccacgauggu . . . . .                                                                           | 1     | 0 | seq |
| . . . . . .aacGucuggggccacgauggu . . . . .                                                                           | 3     | 1 | seq |
| . . . . . .aacaucuggggccacgaugguC . . . . .                                                                          | 1     | 1 | seq |
| . . . . . .aacGucuggggccacgaugguu . . . . .                                                                          | 21    | 1 | seq |
| . . . . . .aacaucuggggccacgaugguu . . . . .                                                                          | 9     | 0 | seq |
| . . . . . .aacGucuggggccacgaugguuu . . . . .                                                                         | 1     | 1 | seq |
| . . . . . .acGucuggggccacgaug . . . . .                                                                              | 12    | 1 | seq |
| . . . . . .acaucuggggccacgaug . . . . .                                                                              | 1     | 0 | seq |
| . . . . . .acaucuggggccacgaugg . . . . .                                                                             | 3     | 0 | seq |
| . . . . . .acGucuggggccacgaugg . . . . .                                                                             | 3     | 1 | seq |
| . . . . . .acaucuggggccacgauggu . . . . .                                                                            | 7     | 0 | seq |
| . . . . . .acGucuggggccacgauggu . . . . .                                                                            | 6     | 1 | seq |
| . . . . . .acaucuggGccacgaugguu . . . . .                                                                            | 2     | 1 | seq |
| . . . . . .acaucuggggccacgaugguu . . . . .                                                                           | 9     | 0 | seq |
| . . . . . .acGucuggggccacgaugguu . . . . .                                                                           | 76    | 1 | seq |
| . . . . . .acGucuggggccacgaugguuu . . . . .                                                                          | 22    | 1 | seq |
| . . . . . .caucuggggccacgaugg . . . . .                                                                              | 9     | 0 | seq |
| . . . . . .caucuggggccacgaCgg . . . . .                                                                              | 1     | 1 | seq |
| . . . . . .caucuggggccacgauggu . . . . .                                                                             | 35    | 0 | seq |
| . . . . . .caucuggggccacgauggA . . . . .                                                                             | 1     | 1 | seq |
| . . . . . .caucuggggccacgauggC . . . . .                                                                             | 4     | 1 | seq |
| . . . . . .caucGggggccacgauggu . . . . .                                                                             | 1     | 1 | seq |
| . . . . . .caucuggggccacgaAggu . . . . .                                                                             | 1     | 1 | seq |
| . . . . . .caucuggggccacgauggGu . . . . .                                                                            | 1     | 1 | seq |
| . . . . . .caucCggggccacgaugguu . . . . .                                                                            | 1     | 1 | seq |
| . . . . . .caucuggggccacgaugguu . . . . .                                                                            | 15    | 0 | seq |
| . . . . . .caucuggggccacgaugguC . . . . .                                                                            | 1     | 1 | seq |
| . . . . . .caucuggGccacgaugguu . . . . .                                                                             | 1     | 1 | seq |
| . . . . . .cGucuggggccacgaugguu . . . . .                                                                            | 44    | 1 | seq |
| . . . . . .cGucuggggccacgaugguuu . . . . .                                                                           | 2     | 1 | seq |
| . . . . . .aucuggggccacgauggA . . . . .                                                                              | 1     | 1 | seq |
| . . . . . .aucuggggccacgauggu . . . . .                                                                              | 4     | 0 | seq |
| . . . . . .aucuggGccacgaugguu . . . . .                                                                              | 1     | 1 | seq |
| . . . . . .aucuggggccacgaugguu . . . . .                                                                             | 60    | 0 | seq |
| . . . . . .aucuggggccacgaugguC . . . . .                                                                             | 11    | 1 | seq |
| . . . . . .Uucuggggccacgaugguu . . . . .                                                                             | 1     | 1 | seq |
| . . . . . .aucuggggccacgauggCu . . . . .                                                                             | 1     | 1 | seq |
| . . . . . .aucuggggccacgauggGu . . . . .                                                                             | 1     | 1 | seq |
| . . . . . .aucGggggccacgaugguu . . . . .                                                                             | 3     | 1 | seq |
| . . . . . .aucuggggccacgaugguuC . . . . .                                                                            | 1     | 1 | seq |
| . . . . . .ucuggggccacgauggAu . . . . .                                                                              | 1     | 1 | seq |
| . . . . . .ucuggggAcacgaugguu . . . . .                                                                              | 1     | 1 | seq |
| . . . . . .ucugUggccacgaugguu . . . . .                                                                              | 1     | 1 | seq |
| . . . . . .ucuggggccCgaugguu . . . . .                                                                               | 50    | 1 | seq |
| . . . . . .Acuggggccacgaugguu . . . . .                                                                              | 1     | 1 | seq |
| . . . . . .ucugAgccacgaugguu . . . . .                                                                               | 1     | 1 | seq |
| . . . . . .ucugggcUacgaugguu . . . . .                                                                               | 1     | 1 | seq |
| . . . . . .Ccuggggccacgaugguu . . . . .                                                                              | 2     | 1 | seq |
| . . . . . .ucuggggccacgaugguu . . . . .                                                                              | 262   | 0 | seq |
| . . . . . .ucuggggccacgaugguA . . . . .                                                                              | 6     | 1 | seq |
| . . . . . .ucuggggccacgaugguC . . . . .                                                                              | 46    | 1 | seq |
| . . . . . .ucuggggccacgauggGu . . . . .                                                                              | 2     | 1 | seq |
| . . . . . .ucuggggccCgaugguuu . . . . .                                                                              | 1     | 1 | seq |



## Mature

## Star

|                                                                                                                                              |    |   |     |
|----------------------------------------------------------------------------------------------------------------------------------------------|----|---|-----|
| agagguuuuggaaggugauccuaacau <u>ucugggccacgaugguuuauuguucaucguguuuuuaucauaa</u> acc <u>cauggugccccagau</u> gaaagagcac <u>cuucgccuucgugccu</u> |    |   |     |
| .....ucugggccacgaugguuu.....                                                                                                                 | 4  | 0 | seq |
| .....ucugggccacgaugguuu.....                                                                                                                 | 2  | 0 | seq |
| .....ucugggccacgaugguuu.....                                                                                                                 | 2  | 0 | seq |
| .....ucuggAccacgaugguuuau.....                                                                                                               | 7  | 1 | seq |
| .....ucugggccacgaugguuuAuu.....                                                                                                              | 6  | 1 | seq |
| .....ucCgggccacgaugguuuau.....                                                                                                               | 23 | 1 | seq |
| .....ucugggccacgaugguuuauG.....                                                                                                              | 3  | 1 | seq |
| .....ucugggccacgaugguuuuu.....                                                                                                               | 4  | 0 | seq |
| .....ucugggccacgaugguuuuuU.....                                                                                                              | 2  | 1 | seq |
| .....ucCgggccacgaugguuuuuug.....                                                                                                             | 2  | 1 | seq |
| .....ucauaaacc <u>cauggugccccagau</u> U.....                                                                                                 | 1  | 1 | seq |
| .....cauaaacc <u>cauggugccccag</u> .....                                                                                                     | 1  | 0 | seq |
| .....auaaacc <u>cauggugccccaga</u> C.....                                                                                                    | 1  | 1 | seq |
| .....auaaacc <u>cauggugccccagau</u> .....                                                                                                    | 2  | 0 | seq |
| .....uaaacc <u>cauggugccccagau</u> A.....                                                                                                    | 2  | 1 | seq |
| .....uaaacc <u>Cauggugccccagau</u> g.....                                                                                                    | 1  | 1 | seq |
| .....uaaacc <u>cauggugccccagau</u> g.....                                                                                                    | 30 | 0 | seq |
| .....uaaacc <u>cau</u> C <u>gugccccagau</u> g.....                                                                                           | 3  | 1 | seq |
| .....uaaacc <u>cauggugccccagau</u> U.....                                                                                                    | 1  | 1 | seq |
| .....aacc <u>cau</u> C <u>gugccccaga</u> .....                                                                                               | 1  | 1 | seq |
| .....aacc <u>cau</u> C <u>gugccccagau</u> g.....                                                                                             | 1  | 1 | seq |
| .....ccauggugccccagau.....                                                                                                                   | 1  | 0 | seq |
| .....cccagau <u>gau</u> Uagagcac <u>cu</u> .....                                                                                             | 3  | 1 | seq |

Provisional ID : MA\_813085\_37281  
 Score total : 1.7  
 Score for star read(s) : -1.3  
 Score for read counts : 0  
 Score for mfe : 1.4  
 Score for randfold : 1.6  
 Score for cons. seed :  
 Total read count : 4954  
 Mature read count : 4954  
 Loop read count : 0  
 Star read count : 0

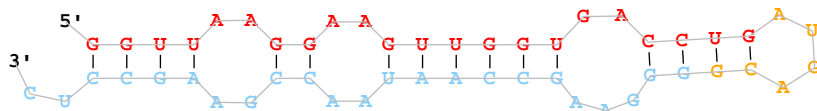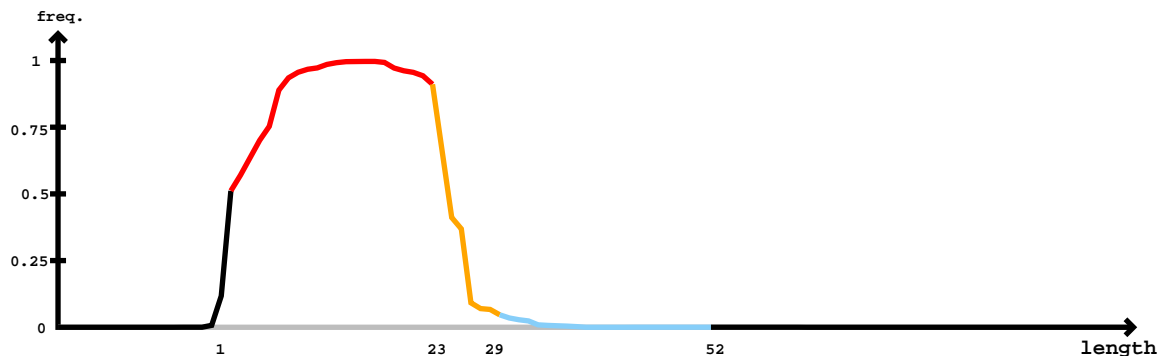

**Mature**

**Star**

| 5' -                                                   | reads | mm | sample |
|--------------------------------------------------------|-------|----|--------|
| cugccagugccgaaaggguuaaggaaguuggugaccugaugacg           | 1     | 0  | seq    |
| (((.....(((.....(((.....(((.....)))))).....))))))..... | 2     | 0  | seq    |
| .....cgaaagguuaaggaaguugg.....                         | 1     | 1  | seq    |
| .....aagguuaaggaaguuggu.....                           | 4     | 0  | seq    |
| .....aagguuaaggaaguugguA.....                          | 1     | 0  | seq    |
| .....aagguuaaggaaguuggug.....                          | 1     | 1  | seq    |
| .....aagguuaaggaaguugguga.....                         | 1     | 0  | seq    |
| .....aagguuGaggaaguuggugac.....                        | 1     | 0  | seq    |
| .....aagguuaaggaaguuggugac.....                        | 1     | 1  | seq    |
| .....Cagguuaaggaaguuggugaccug.....                     | 1     | 0  | seq    |
| .....aagguuaaggaaguuggugaccug.....                     | 3     | 0  | seq    |
| .....aagguuaaggaaguuggugaccuC.....                     | 1     | 1  | seq    |
| .....aagguuaaggaaguuggugaccuga.....                    | 2     | 0  | seq    |
| .....Gagguuaaggaaguuggugaccuga.....                    | 1     | 0  | seq    |
| .....aagguuaaggaaguuggugaccugaug.....                  | 12    | 0  | seq    |
| .....aagguuaaggaaguuggugaccugaugacg.....               | 3     | 0  | seq    |
| .....aagguuaaggaaguuggugaccugaugacgg.....              | 1     | 0  | seq    |
| .....aaggCuaaggaaguuggugaccugaugacgg.....              | 1     | 1  | seq    |
| .....aagguuaaggaaguuggugaccugaugacggg.....             | 1     | 0  | seq    |
| .....aagguuaaggaaguuggugaccugaugacgggga.....           | 1     | 0  | seq    |
| .....agguuaaggaaguuggC.....                            | 1     | 1  | seq    |
| .....agguuaaggaaguuggu.....                            | 20    | 0  | seq    |
| .....agguuaUggaaguuggu.....                            | 1     | 1  | seq    |
| .....agguuaaggaaguuggAg.....                           | 1     | 1  | seq    |
| .....agguuaaggaaguuggCg.....                           | 1     | 1  | seq    |
| .....agguuaaggaaguugguU.....                           | 1     | 1  | seq    |
| .....agguuaaggaaguugguA.....                           | 2     | 1  | seq    |
| .....agguuaaggaaguuggGg.....                           | 1     | 1  | seq    |
| .....agguuaaggaaguuggug.....                           | 40    | 0  | seq    |
| .....agguuaaggaaguugguga.....                          | 21    | 0  | seq    |
| .....agAuuaaggaaguugguga.....                          | 1     | 1  | seq    |
| .....agguuaaggaaguuggugG.....                          | 1     | 1  | seq    |
| .....agguCaaggaaguuggugac.....                         | 1     | 1  | seq    |
| .....agguuaaggaaguuggugac.....                         | 15    | 0  | seq    |
| .....agguuaaggaaguuggugacc.....                        | 5     | 0  | seq    |
| .....agguuaaggaaguuggugaccu.....                       | 1     | 0  | seq    |

## Mature

## Star

cugcccagugccgaaaggguuaaggaagguuggugaccugaugacggggaagccaauaacccaagccucggugaacgaagaucgcaacuauaacgauccuaagguagugaaa

|                                                    |      |   |     |
|----------------------------------------------------|------|---|-----|
| .....agguuaaggaagguuggugaccA.....                  | 1    | 1 | seq |
| .....agguuaaggaagguuggugaccGg.....                 | 1    | 1 | seq |
| .....agguuaaggaGguuggugaccug.....                  | 1    | 1 | seq |
| .....agguuaaggaagguuggugaccuC.....                 | 1    | 1 | seq |
| .....agguuaGggaagguuggugaccug.....                 | 1    | 1 | seq |
| .....agguuaaggaagguuggugauUcug.....                | 1    | 1 | seq |
| .....agguuaaggaagguuggugaccCg.....                 | 1    | 1 | seq |
| .....agguuaaggaagguuggugaccug.....                 | 96   | 0 | seq |
| .....agguuaaggaagguuggCgaccug.....                 | 1    | 1 | seq |
| .....agguuaaggaagguuggugUccuga.....                | 1    | 1 | seq |
| .....agguuaaggaagguuggugaccuCa.....                | 1    | 1 | seq |
| .....agguuaaggaagguuggugaccCga.....                | 1    | 1 | seq |
| .....Ggguaaggaagguuggugaccuga.....                 | 1    | 1 | seq |
| .....agguuaaggaagCugguaccuga.....                  | 1    | 1 | seq |
| .....aggCuaaggaagguuggugaccuga.....                | 1    | 1 | seq |
| .....agguuaaggaGguuggugaccuga.....                 | 2    | 1 | seq |
| .....agguuaaggaagguuggugaccuga.....                | 140  | 0 | seq |
| .....agguuaaggaagguuggugaccugG.....                | 5    | 1 | seq |
| .....agguuaaggaagguuggugaccAga.....                | 1    | 1 | seq |
| .....aggAuaaggaagguuggugaccuga.....                | 1    | 1 | seq |
| .....agguuaaggaagguuggugaccugau.....               | 16   | 0 | seq |
| .....agguuaaggaagguuggCgaccugau.....               | 1    | 1 | seq |
| .....Ngguuaaggaagguuggugaccugau.....               | 1    | 1 | seq |
| .....aggCuaaggaagguuggugaccugau.....               | 1    | 1 | seq |
| .....agguuaaggaagguuggugaccugaG.....               | 1    | 1 | seq |
| .....agguuaaggaagguuggugaccugaC.....               | 2    | 1 | seq |
| .....agguuaaggaagguuggugUccugaug.....              | 1    | 1 | seq |
| .....Ggguaaggaagguuggugaccugaug.....               | 1    | 1 | seq |
| .....agguuaaggaagguuggugaccugGug.....              | 2    | 1 | seq |
| .....agguuaagUaagguuggugaccugaug.....              | 1    | 1 | seq |
| .....agguCaaggaagguuggugaccugaug.....              | 1    | 1 | seq |
| .....Ugguaaggaagguuggugaccugaug.....               | 1    | 1 | seq |
| .....aAguaaggaagguuggugaccugaug.....               | 1    | 1 | seq |
| .....agguuaaggaagguugguUaccugaug.....              | 1    | 1 | seq |
| .....agguuaaggaagguuggugaccugaCg.....              | 3    | 1 | seq |
| .....agguuaaggaagguuggugaccugaug.....              | 150  | 0 | seq |
| .....agguuaaggaagguuggugaccugaugG.....             | 2    | 1 | seq |
| .....agguuaaggaagguuggugaccugauga.....             | 6    | 0 | seq |
| .....agguuaaggaagguuggugaccugaugacg.....           | 13   | 0 | seq |
| .....agguuaaggaagguuggugaccugaugacgg.....          | 3    | 0 | seq |
| .....agguuaaggaagguuggugaccugaugacggg.....         | 2    | 0 | seq |
| .....agguuaaggaagguuggugaccugaugacgggC.....        | 1    | 1 | seq |
| .....agguuaaggaagguuggugaccugaugacgggg.....        | 1    | 0 | seq |
| .....agguuaaggaagguuggugaccugaugacggggga.....      | 1    | 0 | seq |
| .....agguuaaggaagguuggugaccugaugacgggggaagcca..... | 1    | 0 | seq |
| .....gguaaggaagguugguA.....                        | 2    | 1 | seq |
| .....gguaaggaagguuggug.....                        | 56   | 0 | seq |
| .....gguaaggaagguuggAg.....                        | 1    | 1 | seq |
| .....gguaaggaagguugguU.....                        | 2    | 1 | seq |
| .....gguaaGggaagguuggug.....                       | 1    | 1 | seq |
| .....gguaaaggaagguuggugG.....                      | 1    | 1 | seq |
| .....gguaaaggaagguugguga.....                      | 21   | 0 | seq |
| .....gguaaaggaagguuggugGc.....                     | 1    | 1 | seq |
| .....gguaaaggaagguuggugac.....                     | 13   | 0 | seq |
| .....gguaaaggaagguuggugaU.....                     | 1    | 1 | seq |
| .....gguaaaggaagguuggugacc.....                    | 5    | 0 | seq |
| .....gguaaaggaagguuggugaccG.....                   | 4    | 1 | seq |
| .....gguaaaggaagguuggCgaccu.....                   | 1    | 1 | seq |
| .....gguaaaggaagguuggugaccC.....                   | 7    | 1 | seq |
| .....gguaaaggaagguuggugUccu.....                   | 1    | 1 | seq |
| .....gguaaaggaagguuggugaccu.....                   | 40   | 0 | seq |
| .....gguaaagUaagguuggugaccug.....                  | 2    | 1 | seq |
| .....gguaaaggaagguuggugaccAga.....                 | 5    | 1 | seq |
| .....gguaaaggaagguuggugaccuC.....                  | 8    | 1 | seq |
| .....gguGaaggaagguuggugaccug.....                  | 1    | 1 | seq |
| .....gguaaaggaagguuggugacAug.....                  | 1    | 1 | seq |
| .....gguuUaggaagguuggugaccug.....                  | 1    | 1 | seq |
| .....gguaaGggaagguuggugaccug.....                  | 5    | 1 | seq |
| .....gguaaaggaagguuggugaccug.....                  | 1    | 1 | seq |
| .....gguaaaggaagguuggugaccug.....                  | 1157 | 0 | seq |

## Mature

## Star

cugcccagugccgaaaggguuaaggaaguuuggugaccugaugacggggaagccaauaaccgaagccucggugaacgaagaucgcaacuauaacgauccuaagguagugaaa

|                                                  |     |   |     |
|--------------------------------------------------|-----|---|-----|
| .....gguuaaaggaaguuUgugaccug.....                | 1   | 1 | seq |
| .....gguuaaaggaaguuuggugaccCg.....               | 15  | 1 | seq |
| .....gguuGaggaaguuuggugaccug.....                | 4   | 1 | seq |
| .....ggCuaaggaaguuuggugaccug.....                | 2   | 1 | seq |
| .....gguuaaaggaaguuuggugacGug.....               | 1   | 1 | seq |
| .....gguuaaaggaaguuuggGgaccug.....               | 2   | 1 | seq |
| .....gguuaaaggaGguuggugaccug.....                | 8   | 1 | seq |
| .....gguuaaaggaaguuuggugGccug.....               | 7   | 1 | seq |
| .....Cguuaaggaaguuuggugaccug.....                | 1   | 1 | seq |
| .....gguCaaaggaaguuuggugaccug.....               | 2   | 1 | seq |
| .....Aguuaaggaaguuuggugaccug.....                | 1   | 1 | seq |
| .....gguuaaaggaaguuuggGgaccug.....               | 4   | 1 | seq |
| .....gguuaaaggaaguuuggugaccuU.....               | 15  | 1 | seq |
| .....gguuaaaggGaguuggugaccug.....                | 3   | 1 | seq |
| .....gguuUggaaguuuggugaccug.....                 | 1   | 1 | seq |
| .....ggGuaaggaaguuuggugaccug.....                | 3   | 1 | seq |
| .....gguuaaaggaaguuuggugaccGg.....               | 10  | 1 | seq |
| .....gguuaaaggaaguuugAugaccug.....               | 1   | 1 | seq |
| .....gguuaaaggaaguuuggugaccugC.....              | 1   | 1 | seq |
| .....ggGuaaggaaguuuggugaccuga.....               | 1   | 1 | seq |
| .....gguuaaaggaaguuuggugaccuga.....              | 125 | 0 | seq |
| .....gguuGaggaaguuuggugaccuga.....               | 1   | 1 | seq |
| .....gguuaaaggaaguuuggugaccugG.....              | 2   | 1 | seq |
| .....Aguuaaggaaguuuggugaccuga.....               | 1   | 1 | seq |
| .....gguuaaaggaaguuuggugaccugau.....             | 58  | 0 | seq |
| .....gguuaaaggaaguuAaggugaccugau.....            | 1   | 1 | seq |
| .....gguuaaaggaaguuuggugaccugUu.....             | 1   | 1 | seq |
| .....gguuaaaggaaguuuggugaccugaC.....             | 7   | 1 | seq |
| .....gguGaaggaaguuuggugaccugau.....              | 1   | 1 | seq |
| .....gguuaaaggaaguuuggGgaccugaug.....            | 3   | 1 | seq |
| .....gguuaaaggaaguuCggugaccugaug.....            | 1   | 1 | seq |
| .....gguuaaaggaaguuuggugaccugGug.....            | 1   | 1 | seq |
| .....Aguuaaggaaguuuggugaccugaug.....             | 1   | 1 | seq |
| .....gguuaaaggaagCuggugaccugaug.....             | 1   | 1 | seq |
| .....gguuaaaggaaguuuggugaccugaGg.....            | 1   | 1 | seq |
| .....gguuaaaggaaguuuggugGccugaug.....            | 3   | 1 | seq |
| .....gguuAGggaaguuuggugaccugaug.....             | 2   | 1 | seq |
| .....gguuaaaggaaguuuggugaccCgaug.....            | 1   | 1 | seq |
| .....gguuaaaggaaguuuggugaccugaCg.....            | 1   | 1 | seq |
| .....gguuaaaggaAuuuggugaccugaug.....             | 1   | 1 | seq |
| .....gguuaaaggaaguuuggugaccugaug.....            | 396 | 0 | seq |
| .....gguuaaaggGaguuggugaccugaug.....             | 2   | 1 | seq |
| .....gguuaaaggaaguuuggugaccGgaug.....            | 1   | 1 | seq |
| .....gguuaaaggaCguuggugaccugaug.....             | 1   | 1 | seq |
| .....gguuaaaggaagAuggugaccugaug.....             | 1   | 1 | seq |
| .....gguuaaaggaGguuggugaccugaug.....             | 2   | 1 | seq |
| .....gguuaaaggaaguuuggugaccugCuga.....           | 1   | 1 | seq |
| .....gguuaaaggaaguuuggugaccugaugU.....           | 1   | 1 | seq |
| .....gguuaaaggaaguuuggugaccugauga.....           | 23  | 0 | seq |
| .....gguuaaaggaaguuuggugaccugaugac.....          | 5   | 0 | seq |
| .....gguuaaaggaaguuuggugaccugaugGcg.....         | 1   | 1 | seq |
| .....gguuaaaggaaguuuggugGccugaugacg.....         | 1   | 1 | seq |
| .....gguuaaaggaaguuuggugaccugaugacg.....         | 14  | 0 | seq |
| .....gguuaaaggaGguuggugaccugaugacgg.....         | 1   | 1 | seq |
| .....gguuaaaggaaguuuggugaccugaugacggg.....       | 5   | 0 | seq |
| .....gguuaaaggaaguuuggugaccugaugacggggga.....    | 1   | 0 | seq |
| .....gguuaaaggaaguuuggugaccugaugacgggggaa.....   | 1   | 0 | seq |
| .....gguuaaaggaaguuuggugaccugaugacgggggaagc..... | 1   | 0 | seq |
| .....guuaaggaaguuugguga.....                     | 9   | 0 | seq |
| .....guuaaggaaguuuggugaU.....                    | 1   | 1 | seq |
| .....guuaaggaaguuuggugac.....                    | 1   | 0 | seq |
| .....guuaaggaaguuuggugacc.....                   | 12  | 0 | seq |
| .....guuaaggaaguuuggugacA.....                   | 1   | 1 | seq |
| .....Uuuuaaggaaguuuggugacc.....                  | 1   | 1 | seq |
| .....guCaaggaaguuuggugaccu.....                  | 1   | 1 | seq |
| .....guuaaggGaguuggugaccu.....                   | 1   | 1 | seq |
| .....guuaaggaaguuuggugaccG.....                  | 1   | 1 | seq |
| .....guuaaggaaguuuggugaccu.....                  | 20  | 0 | seq |
| .....guuaaggaaguuuggugaccC.....                  | 3   | 1 | seq |
| .....Uuuuaaggaaguuuggugaccug.....                | 1   | 1 | seq |

## Mature

## Star

|                                               |                         |                                             |     |  |  |
|-----------------------------------------------|-------------------------|---------------------------------------------|-----|--|--|
| cugcccagugccgaaaggguuaaggaaguuggugaccugaugacg | gggaagccaauaaccgaagccuc | ggugaacgaagaucgcaacuauaacgauccuaagguagugaaa |     |  |  |
| .....guuaaggaaguuggugaccug.....               | 88                      | 0                                           | seq |  |  |
| .....guuaaggaaguugguUaccug.....               | 1                       | 1                                           | seq |  |  |
| .....guuaUggaaguuggugaccug.....               | 1                       | 1                                           | seq |  |  |
| .....guuaaggaGguuggugaccug.....               | 1                       | 1                                           | seq |  |  |
| .....guuaaggGaguuggugaccug.....               | 1                       | 1                                           | seq |  |  |
| .....guuaaggaaguuggugaccuU.....               | 1                       | 1                                           | seq |  |  |
| .....guuaaggaaguuggugaccGug.....              | 1                       | 1                                           | seq |  |  |
| .....guuaaggaaguuggCgaccug.....               | 2                       | 1                                           | seq |  |  |
| .....guuaaggaaguuggugaccAg.....               | 1                       | 1                                           | seq |  |  |
| .....guuaaggaaguuggugaccCg.....               | 2                       | 1                                           | seq |  |  |
| .....Auuaaggaaguuggugaccug.....               | 1                       | 1                                           | seq |  |  |
| .....guuaUggaaguuggugaccuga.....              | 1                       | 1                                           | seq |  |  |
| .....guuaaggaaguuggugaccuga.....              | 13                      | 0                                           | seq |  |  |
| .....guuaaggaaguuggugaccugG.....              | 2                       | 1                                           | seq |  |  |
| .....guuaaggaaguuggugaccugGu.....             | 1                       | 1                                           | seq |  |  |
| .....guuaaggaGguuggugaccugau.....             | 1                       | 1                                           | seq |  |  |
| .....guuaaggaaguuuAgugaccugau.....            | 1                       | 1                                           | seq |  |  |
| .....guuaaggaaguuggugaccugaC.....             | 4                       | 1                                           | seq |  |  |
| .....guuaaggaaguuggugaccugau.....             | 30                      | 0                                           | seq |  |  |
| .....Auuaaggaaguuggugaccugaug.....            | 1                       | 1                                           | seq |  |  |
| .....gCuaaggaaguuggugaccugaug.....            | 1                       | 1                                           | seq |  |  |
| .....guuaaggaaguuggugaccugaCg.....            | 1                       | 1                                           | seq |  |  |
| .....guuaaggaaguuggugaccugaug.....            | 80                      | 0                                           | seq |  |  |
| .....guuaaggaaguuggCgaccugaug.....            | 1                       | 1                                           | seq |  |  |
| .....guuaaggaaguuggugaccugauga.....           | 4                       | 0                                           | seq |  |  |
| .....guuaaggaaguuggugaccugaugac.....          | 1                       | 0                                           | seq |  |  |
| .....guuaaggaaguuggugaccugaCgacg.....         | 1                       | 1                                           | seq |  |  |
| .....guuaaggaaguuggugaccugaugacC.....         | 1                       | 1                                           | seq |  |  |
| .....guuaaggaaguuggugaccugaugacg.....         | 8                       | 0                                           | seq |  |  |
| .....guuaaggaaguuggugaccugaugacgg.....        | 4                       | 0                                           | seq |  |  |
| .....guuaaggaaguuggugaccugaugacggg.....       | 1                       | 0                                           | seq |  |  |
| .....guuaaggaaguuggugaccugaugacgggga.....     | 3                       | 0                                           | seq |  |  |
| .....uuaaggaaguuggugac.....                   | 3                       | 0                                           | seq |  |  |
| .....uuaaggaaguCggugacc.....                  | 1                       | 1                                           | seq |  |  |
| .....uuaaggaaguuggugacc.....                  | 21                      | 0                                           | seq |  |  |
| .....uuaaggaaguuggugaccA.....                 | 3                       | 1                                           | seq |  |  |
| .....uuaaggaaguuggugaccC.....                 | 6                       | 1                                           | seq |  |  |
| .....uuaaggaaguuggugaccG.....                 | 1                       | 1                                           | seq |  |  |
| .....uuaaggaaguuggugaccu.....                 | 27                      | 0                                           | seq |  |  |
| .....uuaaggaaguuggugaccug.....                | 92                      | 0                                           | seq |  |  |
| .....uuaaggaaguuggugaccuU.....                | 2                       | 1                                           | seq |  |  |
| .....uuaaggaaguuggugaccCg.....                | 2                       | 1                                           | seq |  |  |
| .....uuaGggaaguuggugaccug.....                | 1                       | 1                                           | seq |  |  |
| .....uuaaggaaguuggugaccGug.....               | 1                       | 1                                           | seq |  |  |
| .....uuaaggaaguuggugaccGg.....                | 1                       | 1                                           | seq |  |  |
| .....uuaaggaaguuggugaccAg.....                | 1                       | 1                                           | seq |  |  |
| .....uuaaggaaguCggugaccug.....                | 1                       | 1                                           | seq |  |  |
| .....Nuaggaaguuggugaccug.....                 | 1                       | 1                                           | seq |  |  |
| .....uuaaggGaguuggugaccug.....                | 1                       | 1                                           | seq |  |  |
| .....uuaaggaaguuggugaccuga.....               | 24                      | 0                                           | seq |  |  |
| .....uuaaggaaguuggugaccugG.....               | 1                       | 1                                           | seq |  |  |
| .....uuaaggaaguuggugaccugau.....              | 9                       | 0                                           | seq |  |  |
| .....uuaaggaaguuggugaccugaC.....              | 2                       | 1                                           | seq |  |  |
| .....uuaaggaaguugguUaccugaug.....             | 1                       | 1                                           | seq |  |  |
| .....uuaaggaaguuggugaccugaug.....             | 112                     | 0                                           | seq |  |  |
| .....uCaaggaaguuggugaccugaug.....             | 1                       | 1                                           | seq |  |  |
| .....uuaaggaaguuggugaccugaCg.....             | 2                       | 1                                           | seq |  |  |
| .....uuaaggaaguugAugaccugaug.....             | 1                       | 1                                           | seq |  |  |
| .....uuaaggaaguuggCgaccugaug.....             | 1                       | 1                                           | seq |  |  |
| .....uuaaggaaguugUgaccugaug.....              | 2                       | 1                                           | seq |  |  |
| .....uuaaggaaguuggugaccugGug.....             | 2                       | 1                                           | seq |  |  |
| .....uuaaggaaguuggugaccugauga.....            | 4                       | 0                                           | seq |  |  |
| .....uuGaggaaguuggugaccugauga.....            | 1                       | 1                                           | seq |  |  |
| .....uuaaggaaguuggugaccugaugacg.....          | 6                       | 0                                           | seq |  |  |
| .....uuaaggaaguuggugaccugaugacgg.....         | 6                       | 0                                           | seq |  |  |
| .....uuaaggaaguuggugaccugaugacggg.....        | 1                       | 0                                           | seq |  |  |
| .....uuaaggaaguuggugaccugaugacgggg.....       | 2                       | 0                                           | seq |  |  |
| .....uuaaggaaguuggugaccugaugacgggga.....      | 2                       | 0                                           | seq |  |  |
| .....uuaaggaaguuggugaccugaugacgggAga.....     | 1                       | 1                                           | seq |  |  |
| .....uuaaggaaguuggugaccugaugacggggaag.....    | 1                       | 0                                           | seq |  |  |

Mature

Star

|                                                                                                                  |     |   |     |
|------------------------------------------------------------------------------------------------------------------|-----|---|-----|
| cugcccagugccgaaaggguuagggaaguuaggugaccugaugacggggaagccaauaaccgaagccucggugaacgaagaucgcaacuauaacgauccuaagguagugaaa |     |   |     |
| .....uaaggaaguuaggugacc.....                                                                                     | 24  | 0 | seq |
| .....uaaggaagGuggugacc.....                                                                                      | 1   | 1 | seq |
| .....uaaggaaguuaggugaccu.....                                                                                    | 14  | 0 | seq |
| .....uaaggaaguuaggugaccG.....                                                                                    | 2   | 1 | seq |
| .....uaaggaaguuaggugaccA.....                                                                                    | 1   | 1 | seq |
| .....uaaggaaguuaggugaccC.....                                                                                    | 7   | 1 | seq |
| .....uaaggaaguuaggugaccug.....                                                                                   | 75  | 0 | seq |
| .....uaaggaaguuaggugaccCg.....                                                                                   | 1   | 1 | seq |
| .....Aaaggaaguuaggugaccug.....                                                                                   | 1   | 1 | seq |
| .....Caaggaaguuaggugaccug.....                                                                                   | 1   | 1 | seq |
| .....uaaggGaguuggugaccug.....                                                                                    | 1   | 1 | seq |
| .....Caaggaaguuaggugaccuga.....                                                                                  | 2   | 1 | seq |
| .....uaaggaaguuaggugaccuga.....                                                                                  | 25  | 0 | seq |
| .....uaGggaaguuaggugaccuga.....                                                                                  | 1   | 1 | seq |
| .....uaaggaaguuCgugaccuga.....                                                                                   | 1   | 1 | seq |
| .....uaaggaaguuaggugaccugaA.....                                                                                 | 1   | 1 | seq |
| .....uaaggaaguuaggugaccugau.....                                                                                 | 8   | 0 | seq |
| .....uaaggaaguuaggugaccugaCg.....                                                                                | 2   | 1 | seq |
| .....uaaggaaguuaggugGccugaug.....                                                                                | 1   | 1 | seq |
| .....uaaggaaguuaggugaccugaug.....                                                                                | 148 | 0 | seq |
| .....uaaggaaguuaggCgaccugaug.....                                                                                | 1   | 1 | seq |
| .....uaaggaaguuaggugaccugGug.....                                                                                | 1   | 1 | seq |
| .....Gaaggaaguuaggugaccugaug.....                                                                                | 1   | 1 | seq |
| .....uaaggaaguuaggugaccugauU.....                                                                                | 1   | 1 | seq |
| .....uaaggaaguuaggugaccugauga.....                                                                               | 7   | 0 | seq |
| .....uaaggaaguuaggugaccugaugacg.....                                                                             | 5   | 0 | seq |
| .....uaaggaaguuaggugGccugaugacgg.....                                                                            | 1   | 1 | seq |
| .....uaaggaaguuaggugaccugaugacgg.....                                                                            | 3   | 0 | seq |
| .....uaaggaaguuaggugaccugaugacggg.....                                                                           | 2   | 0 | seq |
| .....uaaggaaguuaggugaccugaugacgggg.....                                                                          | 1   | 0 | seq |
| .....uGaggaaguuaggugaccugaugacgggg.....                                                                          | 1   | 1 | seq |
| .....uaaggaaguuaggugaccugaugacgggA.....                                                                          | 1   | 1 | seq |
| .....uaaggaaguuaggugaccugaugacgggga.....                                                                         | 5   | 0 | seq |
| .....aaggaaguuaggugaccG.....                                                                                     | 2   | 1 | seq |
| .....aaggGaguuggugaccu.....                                                                                      | 1   | 1 | seq |
| .....aaggaaguuaggugaccA.....                                                                                     | 2   | 1 | seq |
| .....aaggaaguuaggugaccu.....                                                                                     | 20  | 0 | seq |
| .....aaggaaguuaggugaccC.....                                                                                     | 3   | 1 | seq |
| .....aaggaagCuggugaccug.....                                                                                     | 1   | 1 | seq |
| .....aaggaaguuaggugaccGg.....                                                                                    | 1   | 1 | seq |
| .....aaggaaguuaggCgaccug.....                                                                                    | 1   | 1 | seq |
| .....aaggaaguuagguaaccug.....                                                                                    | 1   | 1 | seq |
| .....aaggaaguuaggugaccuU.....                                                                                    | 1   | 1 | seq |
| .....Gaggaaguuaggugaccug.....                                                                                    | 1   | 1 | seq |
| .....aaggaaguuaggugaccuC.....                                                                                    | 1   | 1 | seq |
| .....aGggaaguuaggugaccug.....                                                                                    | 1   | 1 | seq |
| .....aaggaaguuaggugaccug.....                                                                                    | 109 | 0 | seq |
| .....aaggaaguuaggugGccug.....                                                                                    | 1   | 1 | seq |
| .....aaggaGguuggugaccug.....                                                                                     | 1   | 1 | seq |
| .....aaggaaguuaggugaccAg.....                                                                                    | 2   | 1 | seq |
| .....aaggGaguuggugaccug.....                                                                                     | 1   | 1 | seq |
| .....aaggGaguuggugaccuga.....                                                                                    | 1   | 1 | seq |
| .....aaggaaguuaggugaccuga.....                                                                                   | 30  | 0 | seq |
| .....aaggaaguuaggugaccugau.....                                                                                  | 6   | 0 | seq |
| .....aaggaaguuaggugaccugaug.....                                                                                 | 1   | 1 | seq |
| .....aaggaaguuaggugaccugaug.....                                                                                 | 70  | 0 | seq |
| .....aaggaaguuaggugaccugGug.....                                                                                 | 2   | 1 | seq |
| .....aaggaGguuggugaccugaug.....                                                                                  | 1   | 1 | seq |
| .....aaggaaguuaggugaccugauga.....                                                                                | 6   | 0 | seq |
| .....aaggaaguuaggugaccugaugacg.....                                                                              | 6   | 0 | seq |
| .....aaggaaguuaggugaccugaugacgg.....                                                                             | 1   | 0 | seq |
| .....aagAaaguuaggugaccugaugacggg.....                                                                            | 1   | 1 | seq |
| .....aaggaaguuaggugaccugaugacggg.....                                                                            | 1   | 0 | seq |
| .....aaggaaguuaggugaccugaugacggggG.....                                                                          | 1   | 1 | seq |
| .....aaggaaguuaggugaccugaugacggggaag.....                                                                        | 1   | 0 | seq |
| .....aggaaguuaggCgaccug.....                                                                                     | 1   | 1 | seq |
| .....aggaaguuaggugaccuU.....                                                                                     | 6   | 1 | seq |
| .....aggaaguuaggugaccuC.....                                                                                     | 1   | 1 | seq |
| .....aggGaguuggugaccug.....                                                                                      | 2   | 1 | seq |
| .....aggaaguCggugaccug.....                                                                                      | 1   | 1 | seq |

## Mature

## Star

cugcccagugccgaaaggguuaaggaaguuggugaccugaugacggggaagccaauaaccgaagccucggugaacgaagaucgcaacuauaacgauccuaagguagugaaa

|                                                     |     |   |     |
|-----------------------------------------------------|-----|---|-----|
| . . . . . aggaaguuggugGccug . . . . .               | 1   | 1 | seq |
| . . . . . aggaaguuggGgaccug . . . . .               | 1   | 1 | seq |
| . . . . . aggaaguuggugaccug . . . . .               | 287 | 0 | seq |
| . . . . . Nggaaguuggugaccug . . . . .               | 1   | 1 | seq |
| . . . . . aggaaguuggugaccCg . . . . .               | 2   | 1 | seq |
| . . . . . aggaGguuggugaccug . . . . .               | 4   | 1 | seq |
| . . . . . aggaaguuggugaccAg . . . . .               | 1   | 1 | seq |
| . . . . . aggaaguuggugacAug . . . . .               | 1   | 1 | seq |
| . . . . . aggaaguuggAgaccug . . . . .               | 1   | 1 | seq |
| . . . . . aggaaguuggugaccGg . . . . .               | 2   | 1 | seq |
| . . . . . Gggaaguuggugaccug . . . . .               | 2   | 1 | seq |
| . . . . . aggaagCugugaccug . . . . .                | 1   | 1 | seq |
| . . . . . aggaaguugguAaccug . . . . .               | 1   | 1 | seq |
| . . . . . aggaaguuggugaccuga . . . . .              | 111 | 0 | seq |
| . . . . . aggaGguuggugaccuga . . . . .              | 3   | 1 | seq |
| . . . . . aggaaguuggugaccugG . . . . .              | 2   | 1 | seq |
| . . . . . aggaaguAaggugaccuga . . . . .             | 1   | 1 | seq |
| . . . . . aggaaguuggugaccugaG . . . . .             | 2   | 1 | seq |
| . . . . . aggaaguuggugaccugau . . . . .             | 25  | 0 | seq |
| . . . . . aggaaguuggugaccugaC . . . . .             | 3   | 1 | seq |
| . . . . . Gggaaguuggugaccugaug . . . . .            | 1   | 1 | seq |
| . . . . . aggaGguuggugaccugaug . . . . .            | 1   | 1 | seq |
| . . . . . aggaaguuggugaccugCug . . . . .            | 1   | 1 | seq |
| . . . . . agAaguuggugaccugaug . . . . .             | 1   | 1 | seq |
| . . . . . aggaaguuggugGccugaug . . . . .            | 1   | 1 | seq |
| . . . . . aggaaguuggugaccCgaug . . . . .            | 1   | 1 | seq |
| . . . . . aggaaguuggugaccugaug . . . . .            | 195 | 0 | seq |
| . . . . . aggaaguuggugaccugaGg . . . . .            | 1   | 1 | seq |
| . . . . . aggaaguuggugaccugaCg . . . . .            | 4   | 1 | seq |
| . . . . . aggGaguuggugaccugaug . . . . .            | 1   | 1 | seq |
| . . . . . aggaaguuggugaccugaugU . . . . .           | 1   | 1 | seq |
| . . . . . aggaaguuggugaccugaugG . . . . .           | 1   | 1 | seq |
| . . . . . aggaaguuggugaccugauga . . . . .           | 16  | 0 | seq |
| . . . . . aggaaguuggugGccugauga . . . . .           | 1   | 1 | seq |
| . . . . . aggaaguuggugaccugaugac . . . . .          | 3   | 0 | seq |
| . . . . . aggaaguuggugaccugaugacg . . . . .         | 11  | 0 | seq |
| . . . . . aggaaguuggugaccuAaugacgg . . . . .        | 1   | 1 | seq |
| . . . . . aggaaguuggugaccugaugacgg . . . . .        | 5   | 0 | seq |
| . . . . . aggaaguuggugaccugaugacggA . . . . .       | 1   | 1 | seq |
| . . . . . aggaaguuggugaccugaugacggg . . . . .       | 2   | 0 | seq |
| . . . . . aggaaguuggugaccugaugacgggg . . . . .      | 4   | 0 | seq |
| . . . . . aggaaguuggugaccugaugacgggga . . . . .     | 5   | 0 | seq |
| . . . . . aggaaguuggugaccugaugacggggaagcU . . . . . | 1   | 1 | seq |
| . . . . . ggaaguuggugaccuga . . . . .               | 51  | 0 | seq |
| . . . . . ggaaguuggugaccuUa . . . . .               | 1   | 1 | seq |
| . . . . . ggaaguuggugaccugU . . . . .               | 1   | 1 | seq |
| . . . . . ggaaguuggugaccugG . . . . .               | 2   | 1 | seq |
| . . . . . ggaaguuggugaccugaC . . . . .              | 1   | 1 | seq |
| . . . . . ggaaguuggugaccugau . . . . .              | 26  | 0 | seq |
| . . . . . ggaaguuggugaccCgaug . . . . .             | 2   | 1 | seq |
| . . . . . ggaaguuggugaccugaGg . . . . .             | 2   | 1 | seq |
| . . . . . ggGaguuggugaccugaug . . . . .             | 1   | 1 | seq |
| . . . . . ggaaguuggugaccugaug . . . . .             | 116 | 0 | seq |
| . . . . . ggaaguuggugaccugaCg . . . . .             | 1   | 1 | seq |
| . . . . . ggaaguugAugaccugaug . . . . .             | 1   | 1 | seq |
| . . . . . ggaaguuggugGccugaug . . . . .             | 1   | 1 | seq |
| . . . . . ggaaguuggugaccugauga . . . . .            | 17  | 0 | seq |
| . . . . . ggaaguuggugaccugaugU . . . . .            | 1   | 1 | seq |
| . . . . . ggaaguuggugaccGgauga . . . . .            | 1   | 1 | seq |
| . . . . . ggaaguuggugaccugaugac . . . . .           | 1   | 0 | seq |
| . . . . . ggaaguuggugaccugaugacg . . . . .          | 10  | 0 | seq |
| . . . . . ggaaguuggugaccugaugacgg . . . . .         | 2   | 0 | seq |
| . . . . . ggaaguuggugaccugaugacgUg . . . . .        | 1   | 1 | seq |
| . . . . . ggaaguuggugaccugaugacgggg . . . . .       | 1   | 0 | seq |
| . . . . . ggaaguuggugaccugaugacgggga . . . . .      | 3   | 0 | seq |
| . . . . . ggaaguuggugaccugaugacggggaagcca . . . . . | 1   | 0 | seq |
| . . . . . gaaguuggugaccugau . . . . .               | 13  | 0 | seq |
| . . . . . gaaguuggugaccugaC . . . . .               | 3   | 1 | seq |
| . . . . . gaaguuggCgaccugaug . . . . .              | 1   | 1 | seq |
| . . . . . gaagCugugaccugaug . . . . .               | 1   | 1 | seq |

## Mature

## Star

cugccccagugccgaaaggguuaaggaaguuggugaccugaugacggggaagccaauaaccgaagccucggugaacgaagaucgcaacuauaacgaucuaagguagugaaa

|                                         |    |   |     |
|-----------------------------------------|----|---|-----|
| .....Naaguuggugaccugaug.....            | 1  | 1 | seq |
| .....gUaguuggugaccugaug.....            | 1  | 1 | seq |
| .....gaaguuggugaccugGug.....            | 1  | 1 | seq |
| .....gaaguuggugaccugaug.....            | 63 | 0 | seq |
| .....gaaguuggugaccugaCg.....            | 2  | 1 | seq |
| .....gaaguuggugaccugauga.....           | 5  | 0 | seq |
| .....gaaguuggugaccugaugac.....          | 1  | 0 | seq |
| .....gaaguuggugaccugaugacg.....         | 7  | 0 | seq |
| .....gaaguuggugGccugaugacg.....         | 1  | 1 | seq |
| .....gaaguuggugaccugaugacgg.....        | 4  | 0 | seq |
| .....gaaguuggugaccugaugacgggga.....     | 4  | 0 | seq |
| .....gaaguuggugaccugaugacggggaa.....    | 2  | 0 | seq |
| .....gaaguuggugaccugaugacggggaagcU..... | 1  | 1 | seq |
| .....aaguuggugaccugGug.....             | 1  | 1 | seq |
| .....aaguuggugaccugaug.....             | 42 | 0 | seq |
| .....aaguuggugaccugauga.....            | 5  | 0 | seq |
| .....aaguuggugaccugaugacg.....          | 1  | 0 | seq |
| .....aaguuggugaccugaugacgg.....         | 1  | 0 | seq |
| .....aaguuggugaccugaugacggg.....        | 3  | 0 | seq |
| .....aaguuggugaccugaugacgggg.....       | 2  | 0 | seq |
| .....aaguuggugaccugaugacggggG.....      | 1  | 1 | seq |
| .....aaguuaGugaccugaugacggggga.....     | 1  | 1 | seq |
| .....aaguuggugaccugaugacggggga.....     | 2  | 0 | seq |
| .....aaguuggugaccugaugacgggggaagc.....  | 1  | 0 | seq |
| .....aguuggugaccugaugU.....             | 1  | 1 | seq |
| .....aguuggugaccugaGga.....             | 1  | 1 | seq |
| .....aguuggugaccugauga.....             | 10 | 0 | seq |
| .....aguuggugaccugaugacg.....           | 3  | 0 | seq |
| .....aguuggugaccugaugacgg.....          | 2  | 0 | seq |
| .....aguuggugaccugaugacggG.....         | 1  | 1 | seq |
| .....aguuggugaccugaugacggg.....         | 3  | 0 | seq |
| .....aguuggugaccugaugacggggga.....      | 5  | 0 | seq |
| .....aguuggugaccugaugacgggggaag.....    | 1  | 0 | seq |
| .....guuggugaccugaugac.....             | 6  | 0 | seq |
| .....guuggugaccugaugacC.....            | 1  | 1 | seq |
| .....guuggugaccugaugacg.....            | 8  | 0 | seq |
| .....guuggugGccugaugacg.....            | 1  | 1 | seq |
| .....guuggugaccugaugacgg.....           | 10 | 0 | seq |
| .....guuggugaccugaugacggg.....          | 6  | 0 | seq |
| .....guuggugaccugaugacggGA.....         | 2  | 1 | seq |
| .....guuggugaccugaugacgggg.....         | 4  | 0 | seq |
| .....guuggugaccugaugacggggga.....       | 22 | 0 | seq |
| .....guuggugaccugaugacggggga.....       | 2  | 0 | seq |
| .....guuggugaccugaugacgggggaag.....     | 2  | 0 | seq |
| .....guuggugaccugaugacgggggaagc.....    | 2  | 0 | seq |
| .....guuggugaccugaugacgggggaagcca.....  | 3  | 0 | seq |
| .....uuggugaccugaugacg.....             | 5  | 0 | seq |
| .....uuggugaUcugaugacgg.....            | 1  | 1 | seq |
| .....uuggugaccugaugacgg.....            | 5  | 0 | seq |
| .....uuggugaccugaugacggg.....           | 4  | 0 | seq |
| .....uuggugaccugaugacggGA.....          | 1  | 1 | seq |
| .....uuggugaccugaugacgggg.....          | 2  | 0 | seq |
| .....uugAugaccugaugacggggga.....        | 1  | 1 | seq |
| .....uuggugaccugaugacggggG.....         | 1  | 1 | seq |
| .....uuggugaccugaugacggggga.....        | 12 | 0 | seq |
| .....uuggugaccugaugacgggggU.....        | 1  | 1 | seq |
| .....uuggugaccugaugacggggga.....        | 1  | 0 | seq |
| .....uuggugaccugaugacgggggaag.....      | 1  | 0 | seq |
| .....uuggugaccugaugacgU.....            | 1  | 1 | seq |
| .....uuggugaccugaugacgg.....            | 5  | 0 | seq |
| .....uuggugaccugaugacggg.....           | 2  | 0 | seq |
| .....uuggugaccugaugacgggC.....          | 1  | 1 | seq |
| .....uuggugaccugaugacgggg.....          | 2  | 0 | seq |
| .....uuggugaccugaugacggggga.....        | 4  | 0 | seq |
| .....Ggugaccugaugacggggga.....          | 1  | 1 | seq |
| .....uuggugaccugaugacggggga.....        | 2  | 0 | seq |
| .....uuggugaccugaugacgggggaag.....      | 1  | 0 | seq |
| .....uuggugaccugaugacgggggaagU.....     | 1  | 1 | seq |
| .....ggugaccugaugacggggga.....          | 2  | 0 | seq |
| .....ggugaccugaugacgggggaagc.....       | 1  | 0 | seq |



# Mature Star

|                                               |                         |                                            |   |   |     |
|-----------------------------------------------|-------------------------|--------------------------------------------|---|---|-----|
| cugcccagugccgaaaagguuaaggaaguuggugaccugaugacg | gggaagccaauaacccaagccuc | ggugaacgaagaucgcaacuuaacgauccuaagguagugaaa |   |   |     |
| .....gugaccugaugacgggg.....                   |                         |                                            | 1 | 0 | seq |
| .....gugaccugaugacgggga.....                  |                         |                                            | 1 | 0 | seq |
| .....ugaccugaugacggggaagcc.....               |                         |                                            | 1 | 0 | seq |
| .....gaccugaugacggggaagc.....                 |                         |                                            | 1 | 0 | seq |
| .....gaccugaugacggggaagcc.....                |                         |                                            | 3 | 0 | seq |
| .....accugaugacggggaagcc.....                 |                         |                                            | 1 | 0 | seq |
| .....ccugaugacggggaagcca.....                 |                         |                                            | 1 | 0 | seq |
| .....cugaugacggggaagcc.....                   |                         |                                            | 3 | 0 | seq |
| .....cugaugacggggaagcca.....                  |                         |                                            | 3 | 0 | seq |
| .....ugaugacggggaagcca.....                   |                         |                                            | 4 | 0 | seq |
| .....cgaagccCcgguagaacga.....                 |                         |                                            | 1 | 1 | seq |

Provisional ID : MA\_83942\_18692  
 Score total : 63.8  
 Score for star read(s) : 3.9  
 Score for read counts : 61.8  
 Score for mfe : 0.3  
 Score for randfold : -2.2  
 Score for cons. seed :  
 Total read count : 133  
 Mature read count : 132  
 Loop read count : 0  
 Star read count : 1

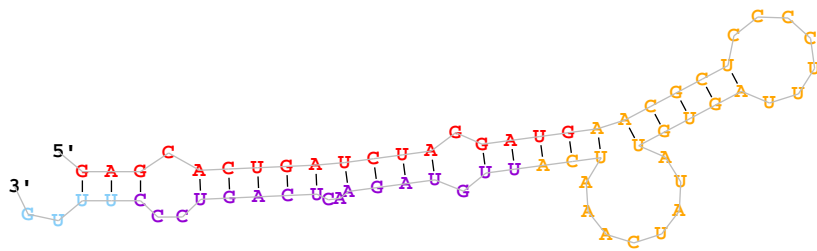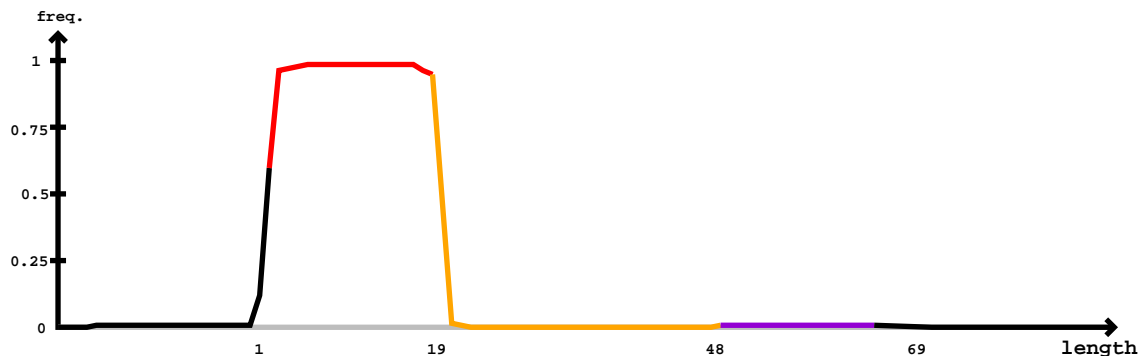

### Mature

### Star

|    |                                                                                                                                                                                                                                                                                                                                                                                                                                                                                                                                                                                                                                                                                                                                                                                                                                                                                                                                                                                                                                                                                                                                                                                                                                                                                                                                                                                                                                                                                                                                                                                                                                                                                                                                                                                                                                                                                                                                                                                                                                                                                                                                                                                                                                                                                                                                                                                                                                                                                                                                                                                                                                                                                                                                                                                                                                                                                                                                                                                                                                                                                                                                                                                                                                                                                                                                                                                                                                                                                                                                                                                                                                                                                                                                                                                                                                                                                                                                                                                                                                                                                                                                                                                                                                                                                                                                                                                                                                                                                                                                                                                                                                                                                                                                                                                                                                                                                                                                                                                                                                                                                                                                                                                                                                                                                                                                                                                                                                                                                                                                                                                                                                                                                                                                                                                                                                                                                                                                                                                                                                                                                                                                                                                                                                                                                                                                                                                                                                                                                                                                                                                                                                                                                                                                                                                                                                                                                                                                                                                                                                                                                                                                                                                                                                                                                                                                                                                                                                                                                                                                                                                                                                                                                                                                                                                                                                                                                                                                                                                                                                                                                                                                                                                                                                                                                                                                                                                                                                                                                                                                                                                                                                                                                                                                                                                                                                                                                                                                                                                                                                                                                                                                                                                                                                                                                                                                                                                                                                                                                                                                                                                                                                                                                                                                                                                                                                                                                                                                                                                                                                                                                                                                                                                                                                                                                                                                                                                                                                                                                                                                                                                                                                                                                                                                                                                                                                                                                                                                                                                                                                                                                                                                                                                                                                                                                                                                                                                                                                                                                                                                                                                                                                                                                                                                                                                                                                                                                                                                                                                                                                                                                                                                                                                                                                                                                                                                                                                                                                                                                                                                                                                                                                                                                                                                                                                                        |                    |         |                       |                    |                          |     |     |  |
|----|--------------------------------------------------------------------------------------------------------------------------------------------------------------------------------------------------------------------------------------------------------------------------------------------------------------------------------------------------------------------------------------------------------------------------------------------------------------------------------------------------------------------------------------------------------------------------------------------------------------------------------------------------------------------------------------------------------------------------------------------------------------------------------------------------------------------------------------------------------------------------------------------------------------------------------------------------------------------------------------------------------------------------------------------------------------------------------------------------------------------------------------------------------------------------------------------------------------------------------------------------------------------------------------------------------------------------------------------------------------------------------------------------------------------------------------------------------------------------------------------------------------------------------------------------------------------------------------------------------------------------------------------------------------------------------------------------------------------------------------------------------------------------------------------------------------------------------------------------------------------------------------------------------------------------------------------------------------------------------------------------------------------------------------------------------------------------------------------------------------------------------------------------------------------------------------------------------------------------------------------------------------------------------------------------------------------------------------------------------------------------------------------------------------------------------------------------------------------------------------------------------------------------------------------------------------------------------------------------------------------------------------------------------------------------------------------------------------------------------------------------------------------------------------------------------------------------------------------------------------------------------------------------------------------------------------------------------------------------------------------------------------------------------------------------------------------------------------------------------------------------------------------------------------------------------------------------------------------------------------------------------------------------------------------------------------------------------------------------------------------------------------------------------------------------------------------------------------------------------------------------------------------------------------------------------------------------------------------------------------------------------------------------------------------------------------------------------------------------------------------------------------------------------------------------------------------------------------------------------------------------------------------------------------------------------------------------------------------------------------------------------------------------------------------------------------------------------------------------------------------------------------------------------------------------------------------------------------------------------------------------------------------------------------------------------------------------------------------------------------------------------------------------------------------------------------------------------------------------------------------------------------------------------------------------------------------------------------------------------------------------------------------------------------------------------------------------------------------------------------------------------------------------------------------------------------------------------------------------------------------------------------------------------------------------------------------------------------------------------------------------------------------------------------------------------------------------------------------------------------------------------------------------------------------------------------------------------------------------------------------------------------------------------------------------------------------------------------------------------------------------------------------------------------------------------------------------------------------------------------------------------------------------------------------------------------------------------------------------------------------------------------------------------------------------------------------------------------------------------------------------------------------------------------------------------------------------------------------------------------------------------------------------------------------------------------------------------------------------------------------------------------------------------------------------------------------------------------------------------------------------------------------------------------------------------------------------------------------------------------------------------------------------------------------------------------------------------------------------------------------------------------------------------------------------------------------------------------------------------------------------------------------------------------------------------------------------------------------------------------------------------------------------------------------------------------------------------------------------------------------------------------------------------------------------------------------------------------------------------------------------------------------------------------------------------------------------------------------------------------------------------------------------------------------------------------------------------------------------------------------------------------------------------------------------------------------------------------------------------------------------------------------------------------------------------------------------------------------------------------------------------------------------------------------------------------------------------------------------------------------------------------------------------------------------------------------------------------------------------------------------------------------------------------------------------------------------------------------------------------------------------------------------------------------------------------------------------------------------------------------------------------------------------------------------------------------------------------------------------------------------------------------------------------------------------------------------------------------------------------------------------------------------------------------------------------------------------------------------------------------------------------------------------------------------------------------------------------------------------------------------------------------------------------------------------------------------------------------------------------------------------------------------------------------------------------------------------------------------------------------------------------------------------------------------------------------------------------------------------------------------------------------------------------------------------------------------------------------------------------------------------------------------------------------------------------------------------------------------------------------------------------------------------------------------------------------------------------------------------------------------------------------------------------------------------------------------------------------------------------------------------------------------------------------------------------------------------------------------------------------------------------------------------------------------------------------------------------------------------------------------------------------------------------------------------------------------------------------------------------------------------------------------------------------------------------------------------------------------------------------------------------------------------------------------------------------------------------------------------------------------------------------------------------------------------------------------------------------------------------------------------------------------------------------------------------------------------------------------------------------------------------------------------------------------------------------------------------------------------------------------------------------------------------------------------------------------------------------------------------------------------------------------------------------------------------------------------------------------------------------------------------------------------------------------------------------------------------------------------------------------------------------------------------------------------------------------------------------------------------------------------------------------------------------------------------------------------------------------------------------------------------------------------------------------------------------------------------------------------------------------------------------------------------------------------------------------------------------------------------------------------------------------------------------------------------------------------------------------------------------------------------------------------------------------------------------------------------------------------------------------------------------------------------------------------------------------------------------------------------------------------------------------------------------------------------------------------------------------------------------------------------------------------------------------------------------------------------------------------------------------------------------------------------------------------------------------------------------------------------------------------------------------------------------------------------------------------------------------------------------------------------------------------------------------------------------------------------------------------------------------------------------------------------------------------------------------------------------------------------------------------------------------------------------------------------------------------------------------------------------------------------------------------------------------------------------------------------------------------------------------------------------------------------------------------------------------------------------------------------------------------------------------------------------------------------------------------------------------------------------------------------------------------------------------------|--------------------|---------|-----------------------|--------------------|--------------------------|-----|-----|--|
| 5' | cuccucuaaaguguaacacua                                                                                                                                                                                                                                                                                                                                                                                                                                                                                                                                                                                                                                                                                                                                                                                                                                                                                                                                                                                                                                                                                                                                                                                                                                                                                                                                                                                                                                                                                                                                                                                                                                                                                                                                                                                                                                                                                                                                                                                                                                                                                                                                                                                                                                                                                                                                                                                                                                                                                                                                                                                                                                                                                                                                                                                                                                                                                                                                                                                                                                                                                                                                                                                                                                                                                                                                                                                                                                                                                                                                                                                                                                                                                                                                                                                                                                                                                                                                                                                                                                                                                                                                                                                                                                                                                                                                                                                                                                                                                                                                                                                                                                                                                                                                                                                                                                                                                                                                                                                                                                                                                                                                                                                                                                                                                                                                                                                                                                                                                                                                                                                                                                                                                                                                                                                                                                                                                                                                                                                                                                                                                                                                                                                                                                                                                                                                                                                                                                                                                                                                                                                                                                                                                                                                                                                                                                                                                                                                                                                                                                                                                                                                                                                                                                                                                                                                                                                                                                                                                                                                                                                                                                                                                                                                                                                                                                                                                                                                                                                                                                                                                                                                                                                                                                                                                                                                                                                                                                                                                                                                                                                                                                                                                                                                                                                                                                                                                                                                                                                                                                                                                                                                                                                                                                                                                                                                                                                                                                                                                                                                                                                                                                                                                                                                                                                                                                                                                                                                                                                                                                                                                                                                                                                                                                                                                                                                                                                                                                                                                                                                                                                                                                                                                                                                                                                                                                                                                                                                                                                                                                                                                                                                                                                                                                                                                                                                                                                                                                                                                                                                                                                                                                                                                                                                                                                                                                                                                                                                                                                                                                                                                                                                                                                                                                                                                                                                                                                                                                                                                                                                                                                                                                                                                                                                                                                  | gagcacugaucuaggaug | aacgcuc | ccccuuuaguguaaucaaauc | uuuguagaacucaguccc | uuuggaaagaggagaguuggccuc | -3' | obs |  |
|    | cuccucuaaaguguaacacua                                                                                                                                                                                                                                                                                                                                                                                                                                                                                                                                                                                                                                                                                                                                                                                                                                                                                                                                                                                                                                                                                                                                                                                                                                                                                                                                                                                                                                                                                                                                                                                                                                                                                                                                                                                                                                                                                                                                                                                                                                                                                                                                                                                                                                                                                                                                                                                                                                                                                                                                                                                                                                                                                                                                                                                                                                                                                                                                                                                                                                                                                                                                                                                                                                                                                                                                                                                                                                                                                                                                                                                                                                                                                                                                                                                                                                                                                                                                                                                                                                                                                                                                                                                                                                                                                                                                                                                                                                                                                                                                                                                                                                                                                                                                                                                                                                                                                                                                                                                                                                                                                                                                                                                                                                                                                                                                                                                                                                                                                                                                                                                                                                                                                                                                                                                                                                                                                                                                                                                                                                                                                                                                                                                                                                                                                                                                                                                                                                                                                                                                                                                                                                                                                                                                                                                                                                                                                                                                                                                                                                                                                                                                                                                                                                                                                                                                                                                                                                                                                                                                                                                                                                                                                                                                                                                                                                                                                                                                                                                                                                                                                                                                                                                                                                                                                                                                                                                                                                                                                                                                                                                                                                                                                                                                                                                                                                                                                                                                                                                                                                                                                                                                                                                                                                                                                                                                                                                                                                                                                                                                                                                                                                                                                                                                                                                                                                                                                                                                                                                                                                                                                                                                                                                                                                                                                                                                                                                                                                                                                                                                                                                                                                                                                                                                                                                                                                                                                                                                                                                                                                                                                                                                                                                                                                                                                                                                                                                                                                                                                                                                                                                                                                                                                                                                                                                                                                                                                                                                                                                                                                                                                                                                                                                                                                                                                                                                                                                                                                                                                                                                                                                                                                                                                                                                                                                  | gagcacugaucuaggaug | aacgcuc | ccccuuuaguguaaucaaauc | uuuguagaacucaguccc | uuuggaaagaggagaguuggccuc |     | exp |  |
|    | (((((((.....))))))(((((((.....))))))(((((((.....))))))(((((((.....))))))(((((((.....))))))(((((((.....))))))(((((((.....))))))(((((((.....))))))(((((((.....))))))(((((((.....))))))(((((((.....))))))(((((((.....))))))(((((((.....))))))(((((((.....))))))(((((((.....))))))(((((((.....))))))(((((((.....))))))(((((((.....))))))(((((((.....))))))(((((((.....))))))(((((((.....))))))(((((((.....))))))(((((((.....))))))(((((((.....))))))(((((((.....))))))(((((((.....))))))(((((((.....))))))(((((((.....))))))(((((((.....))))))(((((((.....))))))(((((((.....))))))(((((((.....))))))(((((((.....))))))(((((((.....))))))(((((((.....))))))(((((((.....))))))(((((((.....))))))(((((((.....))))))(((((((.....))))))(((((((.....))))))(((((((.....))))))(((((((.....))))))(((((((.....))))))(((((((.....))))))(((((((.....))))))(((((((.....))))))(((((((.....))))))(((((((.....))))))(((((((.....))))))(((((((.....))))))(((((((.....))))))(((((((.....))))))(((((((.....))))))(((((((.....))))))(((((((.....))))))(((((((.....))))))(((((((.....))))))(((((((.....))))))(((((((.....))))))(((((((.....))))))(((((((.....))))))(((((((.....))))))(((((((.....))))))(((((((.....))))))(((((((.....))))))(((((((.....))))))(((((((.....))))))(((((((.....))))))(((((((.....))))))(((((((.....))))))(((((((.....))))))(((((((.....))))))(((((((.....))))))(((((((.....))))))(((((((.....))))))(((((((.....))))))(((((((.....))))))(((((((.....))))))(((((((.....))))))(((((((.....))))))(((((((.....))))))(((((((.....))))))(((((((.....))))))(((((((.....))))))(((((((.....))))))(((((((.....))))))(((((((.....))))))(((((((.....))))))(((((((.....))))))(((((((.....))))))(((((((.....))))))(((((((.....))))))(((((((.....))))))(((((((.....))))))(((((((.....))))))(((((((.....))))))(((((((.....))))))(((((((.....))))))(((((((.....))))))(((((((.....))))))(((((((.....))))))(((((((.....))))))(((((((.....))))))(((((((.....))))))(((((((.....))))))(((((((.....))))))(((((((.....))))))(((((((.....))))))(((((((.....))))))(((((((.....))))))(((((((.....))))))(((((((.....))))))(((((((.....))))))(((((((.....))))))(((((((.....))))))(((((((.....))))))(((((((.....))))))(((((((.....))))))(((((((.....))))))(((((((.....))))))(((((((.....))))))(((((((.....))))))(((((((.....))))))(((((((.....))))))(((((((.....))))))(((((((.....))))))(((((((.....))))))(((((((.....))))))(((((((.....))))))(((((((.....))))))(((((((.....))))))(((((((.....))))))(((((((.....))))))(((((((.....))))))(((((((.....))))))(((((((.....))))))(((((((.....))))))(((((((.....))))))(((((((.....))))))(((((((.....))))))(((((((.....))))))(((((((.....))))))(((((((.....))))))(((((((.....))))))(((((((.....))))))(((((((.....))))))(((((((.....))))))(((((((.....))))))(((((((.....))))))(((((((.....))))))(((((((.....))))))(((((((.....))))))(((((((.....))))))(((((((.....))))))(((((((.....))))))(((((((.....))))))(((((((.....))))))(((((((.....))))))(((((((.....))))))(((((((.....))))))(((((((.....))))))(((((((.....))))))(((((((.....))))))(((((((.....))))))(((((((.....))))))(((((((.....))))))(((((((.....))))))(((((((.....))))))(((((((.....))))))(((((((.....))))))(((((((.....))))))(((((((.....))))))(((((((.....))))))(((((((.....))))))(((((((.....))))))(((((((.....))))))(((((((.....))))))(((((((.....))))))(((((((.....))))))(((((((.....))))))(((((((.....))))))(((((((.....))))))(((((((.....))))))(((((((.....))))))(((((((.....))))))(((((((.....))))))(((((((.....))))))(((((((.....))))))(((((((.....))))))(((((((.....))))))(((((((.....))))))(((((((.....))))))(((((((.....))))))(((((((.....))))))(((((((.....))))))(((((((.....))))))(((((((.....))))))(((((((.....))))))(((((((.....))))))(((((((.....))))))(((((((.....))))))(((((((.....))))))(((((((.....))))))(((((((.....))))))(((((((.....))))))(((((((.....))))))(((((((.....))))))(((((((.....))))))(((((((.....))))))(((((((.....))))))(((((((.....))))))(((((((.....))))))(((((((.....))))))(((((((.....))))))(((((((.....))))))(((((((.....))))))(((((((.....))))))(((((((.....))))))(((((((.....))))))(((((((.....))))))(((((((.....))))))(((((((.....))))))(((((((.....))))))(((((((.....))))))(((((((.....))))))(((((((.....))))))(((((((.....))))))(((((((.....))))))(((((((.....))))))(((((((.....))))))(((((((.....))))))(((((((.....))))))(((((((.....))))))(((((((.....))))))(((((((.....))))))(((((((.....))))))(((((((.....))))))(((((((.....))))))(((((((.....))))))(((((((.....))))))(((((((.....))))))(((((((.....))))))(((((((.....))))))(((((((.....))))))(((((((.....))))))(((((((.....))))))(((((((.....))))))(((((((.....))))))(((((((.....))))))(((((((.....))))))(((((((.....))))))(((((((.....))))))(((((((.....))))))(((((((.....))))))(((((((.....))))))(((((((.....))))))(((((((.....))))))(((((((.....))))))(((((((.....))))))(((((((.....))))))(((((((.....))))))(((((((.....))))))(((((((.....))))))(((((((.....))))))(((((((.....))))))(((((((.....))))))(((((((.....))))))(((((((.....))))))(((((((.....))))))(((((((.....))))))(((((((.....))))))(((((((.....))))))(((((((.....))))))(((((((.....))))))(((((((.....))))))(((((((.....))))))(((((((.....))))))(((((((.....))))))(((((((.....))))))(((((((.....))))))(((((((.....))))))(((((((.....))))))(((((((.....))))))(((((((.....))))))(((((((.....))))))(((((((.....))))))(((((((.....))))))(((((((.....))))))(((((((.....))))))(((((((.....))))))(((((((.....))))))(((((((.....))))))(((((((.....))))))(((((((.....))))))(((((((.....))))))(((((((.....))))))(((((((.....))))))(((((((.....))))))(((((((.....))))))(((((((.....))))))(((((((.....))))))(((((((.....))))))(((((((.....))))))(((((((.....))))))(((((((.....))))))(((((((.....))))))(((((((.....))))))(((((((.....))))))(((((((.....))))))(((((((.....))))))(((((((.....))))))(((((((.....))))))(((((((.....))))))(((((((.....))))))(((((((.....))))))(((((((.....))))))(((((((.....))))))(((((((.....))))))(((((((.....))))))(((((((.....))))))(((((((.....))))))(((((((.....))))))(((((((.....))))))(((((((.....))))))(((((((.....))))))(((((((.....))))))(((((((.....))))))(((((((.....))))))(((((((.....))))))(((((((.....))))))(((((((.....))))))(((((((.....))))))(((((((.....))))))(((((((.....))))))(((((((.....))))))(((((((.....))))))(((((((.....))))))(((((((.....))))))(((((((.....))))))(((((((.....))))))(((((((.....))))))(((((((.....))))))(((((((.....))))))(((((((.....))))))(((((((.....))))))(((((((.....))))))(((((((.....))))))(((((((.....))))))(((((((.....))))))(((((((.....))))))(((((((.....))))))(((((((.....))))))(((((((.....))))))(((((((.....))))))(((((((.....))))))(((((((.....))))))(((((((.....))))))(((((((.....))))))(((((((.....))))))(((((((.....))))))(((((((.....))))))(((((((.....))))))(((((((.....))))))(((((((.....))))))(((((((.....))))))(((((((.....))))))(((((((.....))))))(((((((.....))))))(((((((.....))))))(((((((.....))))))(((((((.....))))))(((((((.....))))))(((((((.....))))))(((((((.....))))))(((((((.....))))))(((((((.....))))))(((((((.....))))))(((((((.....))))))(((((((.....))))))(((((((.....))))))(((((((.....))))))(((((((.....))))))(((((((.....))))))(((((((.....))))))(((((((.....))))))(((((((.....))))))(((((((.....))))))(((((((.....))))))(((((((.....))))))(((((((.....))))))(((((((.....))))))(((((((.....))))))(((((((.....))))))(((((((.....))))))(((((((.....))))))(((((((.....))))))(((((((.....))))))(((((((.....))))))(((((((.....))))))(((((((.....))))))(((((((.....))))))(((((((.....))))))(((((((.....))))))(((((((.....))))))(((((((.....))))))(((((((.....))))))(((((((.....))))))(((((((.....))))))(((((((.....))))))(((((((.....))))))(((((((.....))))))(((((((.....))))))(((((((.....))))))(((((((.....))))))(((((((.....))))))(((((((.....))))))(((((((.....))))))(((((((.....))))))(((((((.....))))))(((((((.....))))))(((((((.....))))))(((((((.....))))))(((((((.....))))))(((((((.....))))))(((((((.....))))))(((((((.....))))))(((((((.....))))))(((((((.....))))))(((((((.....))))))(((((((.....))))))(((((((.....))))))(((((((.....))))))(((((((.....))))))(((((((.....))))))(((((((.....))))))(((((((.....))))))(((((((.....))))))(((((((.....))))))(((((((.....))))))(((((((.....))))))(((((((.....))))))(((((((.....))))))(((((((.....))))))(((((((.....))))))(((((((.....))))))(((((((.....))))))(((((((.....))))))(((((((.....))))))(((((((.....))))))(((((((.....))))))(((((((.....))))))(((((((.....))))))(((((((.....))))))(((((((.....))))))(((((((.....))))))(((((((.....))))))(((((((.....))))))(((((((.....))))))(((((((.....))))))(((((((.....))))))(((((((.....))))))(((((((.....))))))(((((((.....))))))(((((((.....))))))(((((((.....))))))(((((((.....))))))(((((((.....))))))(((((((.....))))))(((((((.....))))))(((((((.....))))))(((((((.....))))))(((((((.....))))))(((((((.....))))))(((((((.....))))))(((((((.....))))))(((((((.....))))))(((((((.....))))))(((((((.....))))))(((((((.....))))))(((((((.....))))))(((((((.....))))))(((((((.....))))))(((((((.....))))))(((((((.....))))))(((((((.....))))))(((((((.....))))))(((((((.....))))))(((((((.....))))))(((((((.....))))))(((((((.....))))))(((((((.....))))))(((((((.....))))))(((((((.....))))))(((((((.....))))))(((((((.....))))))(((((((.....))))))(((((((.....))))))(((((((.....))))))(((((((.....))))))(((((((.....))))))(((((((.....))))))(((((((.....))))))(((((((.....))))))(((((((.....))))))(((((((.....))))))(((((((.....))))))(((((((.....))))))(((((((.....))))))(((((((.....))))))(((((((.....))))))(((((((.....))))))(((((((.....))))))(((((((.....))))))(((((((.....))))))(((((((.....))))))(((((((.....))))))(((((((.....))))))(((((((.....))))))(((((((.....))))))(((((((.....))))))(((((((.....))))))(((((((.....))))))(((((((.....))))))(((((((.....))))))(((((((.....))))))(((((((.....))))))(((((((.....))))))(((((((.....))))))(((((((.....))))))(((((((.....))))))(((((((.....))))))(((((((.....))))))(((((((.....))))))(((((((.....))))))(((((((.....))))))(((((((.....))))))(((((((.....))))))(((((((.....))))))(((((((.....))))))(((((((.....))))))(((((((.....))))))(((((((.....))))))(((((((.....))))))(((((((.....))))))(((((((.....))))))(((((((.....))))))(((((((.....))))))(((((((.....))))))(((((((.....))))))(((((((.....))))))(((((((.....))))))(((((((.....))))))(((((((.....))))))(((((((.....))))))(((((((.....))))))(((((((.....))))))(((((((.....))))))(((((((.....))))))(((((((.....))))))(((((((.....))))))(((((((.....))))))(((((((.....))))))(((((((.....))))))(((((((.....))))))(((((((.....))))))(((((((.....))))))(((((((.....))))))(((((((.....))))))(((((((.....))))))(((((((.....))))))(((((((.....))))))(((((((.....))))))(((((((.....))))))(((((((.....))))))(((((((.....))))))(((((((.....))))))(((((((.....))))))(((((((.....))))))(((((((.....))))))(((((((.....))))))(((((((.....))))))(((((((.....))))))(((((((.....))))))(((((((.....))))))(((((((.....))))))(((((((.....))))))(((((((.....))))))(((((((.....))))))(((((((.....))))))(((((((.....))))))(((((((.....))))))(((((((.....))))))(((((((.....))))))(((((((.....))))))(((((((.....))))))(((((((.....))))))(((((((.....))))))(((((((.....))))))(((((((.....))))))(((((((.....))))))(((((((.....))))))(((((((.....))))))(((((((.....))))))(((((((.....))))))(((((((.....))))))(((((((.....))))))(((((((.....))))))(((((((.....))))))(((((((.....))))))(((((((.....))))))(((((((.....))))))(((((((.....))))))(((((((.....))))))(((((((.....))))))(((((((.....))))))(((((((.....))))))(((((((.....))))))(((((((.....))))))(((((((.....))))))(((((((.....))))))(((((((.....))))))(((((((.....))))))(((((((.....))))))(((((((.....))))))(((((((.....))))))(((((((.....))))))(((((((.....))))))(((((((.....))))))(((((((.....))))))(((((((.....))))))(((((((.....))))))(((((((.....))))))(((((((.....))))))(((((((.....))))))(((((((.....))))))(((((((.....))))))(((((((.....))))))(((((((.....))))))(((((((.....))))))(((((((.....))))))(((((((.....))))))(((((((.....))))))(((((((.....))))))(((((((.....))))))(((((((.....))))))(((((((.....))))))(((((((.....))))))(((((((.....))))))(((((((.....))))))(((((((.....))))))(((((((.....))))))(((((((.....))))))(((((((.....))))))(((((((.....))))))(((((((.....))))))(((((((.....))))))(((((((.....))))))(((((((.....))))))(((((((.....))))))(((((((.....))))))(((((((.....))))))(((((((.....))))))(((((((.....))))))(((((((.....))))))(((((((.....))))))(((((((.....))))))(((((((.....))))))(((((((.....))))))(((((((.....))))))(((((((.....))))))(((((((.....))))))(((((((.....))))))(((((((.....))))))(((((((.....))))))(((((((.....))))))(((((((.....))))))(((((((.....))))))(((((((.....))))))(((((((.....))))))(((((((.....))))))(((((((.....))))))(((((((.....))))))(((((((.....)))))) |                    |         |                       |                    |                          |     |     |  |

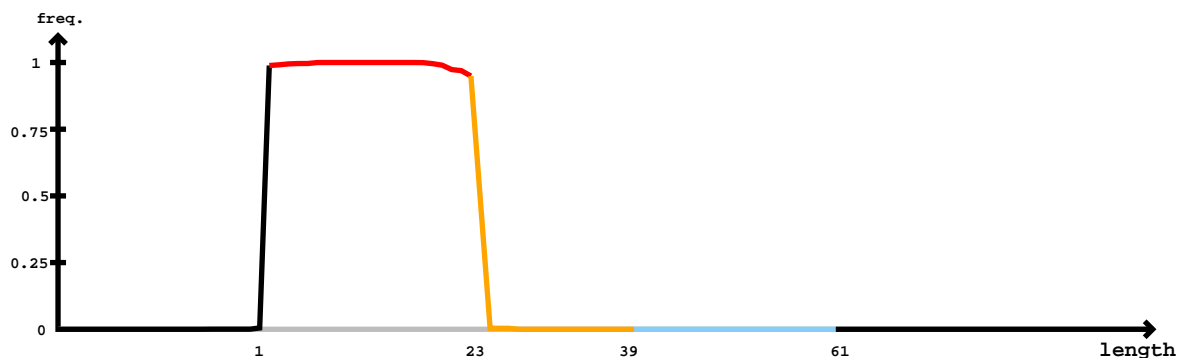

Star

# Mature

# Star

|                      |                         |                |                    |                                  |     |   |     |
|----------------------|-------------------------|----------------|--------------------|----------------------------------|-----|---|-----|
| ugaggaagcgaaauguuucu | ucacgucagggccacgaugguuu | auaggucucaguaa | ccaugggucgacgagaag | agcacauucguuuucguuugcagagauugcga |     |   |     |
| .....                | ucacgucagggccacgaugguuu | .....          |                    |                                  | 1   | 0 | seq |
| .....                | cacgucUggggccacgau      | .....          |                    |                                  | 1   | 1 | seq |
| .....                | cacgucUggggccacgaug     | .....          |                    |                                  | 5   | 1 | seq |
| .....                | cacgucUggggccacgaugg    | .....          |                    |                                  | 6   | 1 | seq |
| .....                | cacgucUggggccacgauggu   | .....          |                    |                                  | 18  | 1 | seq |
| .....                | cacgucUggggccacgaugguu  | .....          |                    |                                  | 22  | 1 | seq |
| .....                | cacgucUggggccacgaugguuu | .....          |                    |                                  | 33  | 1 | seq |
| .....                | acgucUggggccacgaug      | .....          |                    |                                  | 12  | 1 | seq |
| .....                | acgucUggggccacgaugg     | .....          |                    |                                  | 3   | 1 | seq |
| .....                | acgucUggggccacgauggu    | .....          |                    |                                  | 6   | 1 | seq |
| .....                | acgucUggggccacgaugguu   | .....          |                    |                                  | 76  | 1 | seq |
| .....                | acgucCggggccacgaugguu   | .....          |                    |                                  | 1   | 1 | seq |
| .....                | acgucUggggccacgaugguuu  | .....          |                    |                                  | 22  | 1 | seq |
| .....                | cgucaggUccacgauggu      | .....          |                    |                                  | 1   | 1 | seq |
| .....                | cgucUggggccacgaugguu    | .....          |                    |                                  | 44  | 1 | seq |
| .....                | cgucUggggccacgaugguuu   | .....          |                    |                                  | 2   | 1 | seq |
| .....                | gucagggccacgauggu       | .....          |                    |                                  | 1   | 0 | seq |
| .....                | ucagggccacgaugguu       | .....          |                    |                                  | 3   | 0 | seq |
| .....                | ucagggccacgaugguuu      | .....          |                    |                                  | 1   | 0 | seq |
| .....                | ucagggccacUaugguuu      | .....          |                    |                                  | 1   | 1 | seq |
| .....                | ucagggccacgaugguuuau    | .....          |                    |                                  | 1   | 0 | seq |
| .....                | ucagggccacgaugguuuGu    | .....          |                    |                                  | 1   | 1 | seq |
| .....                | ucCggggccacgaugguuuua   | .....          |                    |                                  | 117 | 1 | seq |
| .....                | ucagggccacgaugguuuauGg  | .....          |                    |                                  | 1   | 1 | seq |
| .....                | cCggggccacgaugguuuua    | .....          |                    |                                  | 2   | 1 | seq |



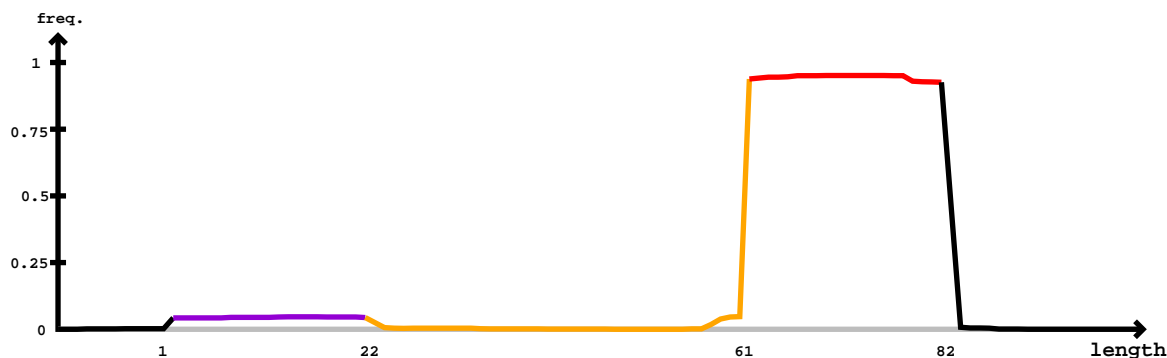

## Mature

## Star

## Mature

|                                                                                                                 |      |   |     |
|-----------------------------------------------------------------------------------------------------------------|------|---|-----|
| gaaccacugugaguccagacacacuuuggcugcauccugugugucuugaagguagucacgucuuagucucaaguguuucuggacucacaccagugguccuaacacuggcag |      |   |     |
| .....ucaaguguuucuggacuca.....                                                                                   | 1    | 0 | seq |
| .....ucaaguguuucuggacucac.....                                                                                  | 1    | 0 | seq |
| .....ucaaguguuCcuggacucaccc.....                                                                                | 2    | 1 | seq |
| .....ucaagCguuucuggacucaccc.....                                                                                | 3    | 1 | seq |
| .....Ccaaguguuucuggacucaccc.....                                                                                | 2    | 1 | seq |
| .....ucaaguguuucuggacCcacc.....                                                                                 | 7    | 1 | seq |
| .....Acaaguguuucuggacucaccc.....                                                                                | 1    | 1 | seq |
| .....ucaagAguuucuggacucaccc.....                                                                                | 1    | 1 | seq |
| .....ucaGguguuucuggacucaccc.....                                                                                | 3    | 1 | seq |
| .....ucaaguguuuGuggacucaccc.....                                                                                | 1    | 1 | seq |
| .....ucaaguguuucAagacucaccc.....                                                                                | 1    | 1 | seq |
| .....ucaaguguuucuggacucacU.....                                                                                 | 134  | 1 | seq |
| .....ucaaguguuucuggacGcacc.....                                                                                 | 1    | 1 | seq |
| .....ucGaguguuucuggacucaccc.....                                                                                | 2    | 1 | seq |
| .....ucaagGguuucuggacucaccc.....                                                                                | 1    | 1 | seq |
| .....ucaaguguuucuggacucacG.....                                                                                 | 5    | 1 | seq |
| .....ucaaguguCucuggacucaccc.....                                                                                | 6    | 1 | seq |
| .....ucaaguguuucuggacucaccc.....                                                                                | 1058 | 0 | seq |
| .....ucaaguguuucCggacucaccc.....                                                                                | 6    | 1 | seq |
| .....Ncaaguguuucuggacucaccc.....                                                                                | 1    | 1 | seq |
| .....ucaaguguuucuggGcucaccc.....                                                                                | 2    | 1 | seq |
| .....ucaaguAuuucuggacucaccc.....                                                                                | 1    | 1 | seq |
| .....ucaaguguuucuggacucaUc.....                                                                                 | 2    | 1 | seq |
| .....ucaaguguuucuggacucaUacc.....                                                                               | 1    | 1 | seq |
| .....uccaaAuguuucuggacucaccc.....                                                                               | 1    | 1 | seq |
| .....ucaagugCuucuggacucaccc.....                                                                                | 2    | 1 | seq |
| .....ucaaguguuucuggacucacA.....                                                                                 | 36   | 1 | seq |
| .....ucUaguguuucuggacucaccc.....                                                                                | 1    | 1 | seq |
| .....ucaaguguuucuggacucUcc.....                                                                                 | 1    | 1 | seq |
| .....ucaaguguGucuggacucaccc.....                                                                                | 1    | 1 | seq |
| .....ucaaguguuucAggacucaccc.....                                                                                | 1    | 1 | seq |
| .....uccaaCuguuucuggacucaccc.....                                                                               | 1    | 1 | seq |
| .....ucaaguguuucuggacucacca.....                                                                                | 1    | 0 | seq |
| .....ucaaguguuucuggacGcacca.....                                                                                | 1    | 1 | seq |
| .....ucaaguguuucuggacucaccG.....                                                                                | 1    | 1 | seq |
| .....caaguguuucuggacucaccc.....                                                                                 | 4    | 0 | seq |
| .....caaguguuucuggacucaccC.....                                                                                 | 1    | 1 | seq |
| .....aaguguuucuggacCcacc.....                                                                                   | 1    | 1 | seq |
| .....aaguguuucuggacucaccag.....                                                                                 | 4    | 0 | seq |
| .....guguuucuggacucaccc.....                                                                                    | 2    | 0 | seq |
| .....uguuucuggacucaccagAg.....                                                                                  | 1    | 1 | seq |
| .....uguuucuggacucaccagugg.....                                                                                 | 4    | 0 | seq |
| .....uguuucuggacucaccagugA.....                                                                                 | 1    | 1 | seq |
| .....uucuggacucaccagugguUc.....                                                                                 | 1    | 1 | seq |

Provisional ID : MA\_8540278\_41922  
 Score total : 1.2  
 Score for star read(s) : -1.3  
 Score for read counts : 0  
 Score for mfe : 0.9  
 Score for randfold : 1.6  
 Score for cons. seed :  
 Total read count : 8889  
 Mature read count : 7420  
 Loop read count : 0  
 Star read count : 1469

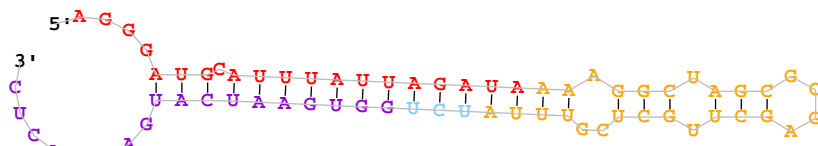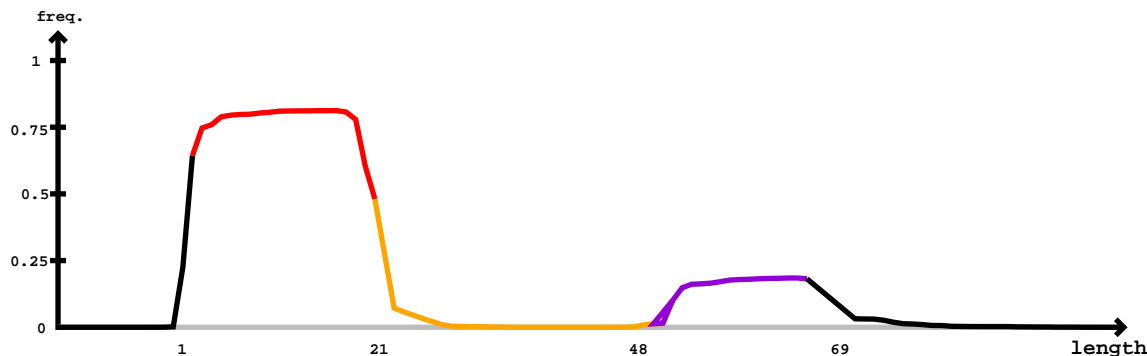

## Mature

## Star

| 5' -                                                                                                             | obs | exp | reads | mm | sample |
|------------------------------------------------------------------------------------------------------------------|-----|-----|-------|----|--------|
| cgacacuuugaaaggggaugcauuuuuuagauaaaggcuagcgcgagcuugcucguuuuauucuggugaaucaugauaacucaacgggaucgcacaacccuugugcuggcaa | -3' |     |       |    |        |
| cgacacuuugaaaggggaugcauuuuuuagauaaaggcuagcgcgagcuugcucguuuuucuggugaaucaugauaacucaacgggaucgcacaacccuugugcuggcaa   |     |     |       |    |        |
| .((.(((((.....(((.(((((((((((((((((((.((.....)))..)))..))))))))))))))))..))))..)).((((.....))))).)               |     |     |       |    |        |
| .....Cgaaaggggaugcauuuuuuagau.....                                                                               |     |     | 1     | 1  | seq    |
| .....gCaaggggaugcauuuuuuagaua.....                                                                               |     |     | 1     | 1  | seq    |
| .....Uaaggggaugcauuuuuuaga.....                                                                                  |     |     | 2     | 1  | seq    |
| .....Naaggggaugcauuuuuuaga.....                                                                                  |     |     | 2     | 1  | seq    |
| .....aaaggggaugcauuuuuuaga.....                                                                                  |     |     | 1     | 0  | seq    |
| .....Naaggggaugcauuuuuuagau.....                                                                                 |     |     | 2     | 1  | seq    |
| .....aaaggggaugcauuuuuuagaua.....                                                                                |     |     | 1     | 0  | seq    |
| .....Caaggggaugcauuuuuuagaua.....                                                                                |     |     | 1     | 1  | seq    |
| .....Naaggggaugcauuuuuuagaua.....                                                                                |     |     | 1     | 1  | seq    |
| .....aaaggAaugcauuuuuuagaua.....                                                                                 |     |     | 1     | 1  | seq    |
| .....Uaaggggaugcauuuuuuagaua.....                                                                                |     |     | 1     | 1  | seq    |
| .....Gaaggggaugcauuuuuuagauaaaaggcu.....                                                                         |     |     | 1     | 1  | seq    |
| .....aaggggaugcauuuGauua.....                                                                                    |     |     | 1     | 1  | seq    |
| .....aaggggaugcauuuuuuua.....                                                                                    |     |     | 52    | 0  | seq    |
| .....aaggggauAcauuuuuuag.....                                                                                    |     |     | 1     | 1  | seq    |
| .....aaggggaugcauuuuuuuaA.....                                                                                   |     |     | 2     | 1  | seq    |
| .....Naggggaugcauuuuuuag.....                                                                                    |     |     | 1     | 1  | seq    |
| .....aaggggaugcGuuuuuuuag.....                                                                                   |     |     | 1     | 1  | seq    |
| .....aaggggaugcauuuuuuuag.....                                                                                   |     |     | 92    | 0  | seq    |
| .....aaggggaugcauCuuuuag.....                                                                                    |     |     | 1     | 1  | seq    |
| .....aaggggaugcauuuGuuaga.....                                                                                   |     |     | 1     | 1  | seq    |
| .....aaggggaugcGuuuuuuuaga.....                                                                                  |     |     | 1     | 1  | seq    |
| .....aaggggaugcauuuuuuuaga.....                                                                                  |     |     | 398   | 0  | seq    |
| .....aaAaggaugcauuuuuuuaga.....                                                                                  |     |     | 1     | 1  | seq    |
| .....aaggggaugcauuuuuuuagC.....                                                                                  |     |     | 1     | 1  | seq    |
| .....aaggggaugcauuuuuuGaga.....                                                                                  |     |     | 1     | 1  | seq    |
| .....aaggggaugcauuuuuuGga.....                                                                                   |     |     | 1     | 1  | seq    |
| .....aaggggaugUauuuuuuuaga.....                                                                                  |     |     | 2     | 1  | seq    |
| .....aaggggaugcauuuuuuuagG.....                                                                                  |     |     | 2     | 1  | seq    |
| .....aaggggaugcauuuuuuuagU.....                                                                                  |     |     | 2     | 1  | seq    |
| .....aaggggaugcauuuuuuuagau.....                                                                                 |     |     | 309   | 0  | seq    |
| .....aaggggaugcauuuuuuuagGu.....                                                                                 |     |     | 3     | 1  | seq    |
| .....aaggggaugcGuuuuuuuagau.....                                                                                 |     |     | 2     | 1  | seq    |



## Mature

## Star

cgacacuuugaaaggggaugcauuuuuagauaaaagggcuagcgcgagcuugcucguuuuauucuggugaaucaugauaacucaacgggaucgcacaaacccuugcugggcaa

|                                       |     |   |     |
|---------------------------------------|-----|---|-----|
| .....aaggggaugUauuuuuuagau.....       | 2   | 1 | seq |
| .....aaggggaugcauuuuuagaC.....        | 33  | 1 | seq |
| .....Gaggggaugcauuuuuagau.....        | 1   | 1 | seq |
| .....aaggggaugcauuCauuagau.....       | 3   | 1 | seq |
| .....aaggggaugcauuUuuagau.....        | 1   | 1 | seq |
| .....aaggggaugcauCuuuagau.....        | 1   | 1 | seq |
| .....aaggggaugcaCuuuuagaua.....       | 2   | 1 | seq |
| .....aaggggaugcGuuuuuuagaua.....      | 1   | 1 | seq |
| .....aaggggaugcauuCauuagaua.....      | 1   | 1 | seq |
| .....aaggggaugcauuuuuagaua.....       | 970 | 0 | seq |
| .....aaggggaugcauuuGuuagaua.....      | 3   | 1 | seq |
| .....aaggggaugcauuuuuGgaua.....       | 2   | 1 | seq |
| .....aaggggaugcauuuuuagauU.....       | 2   | 1 | seq |
| .....aaggggaCgcauuuuuagaua.....       | 2   | 1 | seq |
| .....aaggggauACauuuuuuagaua.....      | 1   | 1 | seq |
| .....Naggggaugcauuuuuagaua.....       | 2   | 1 | seq |
| .....aaggggaugcauuuuuagaCa.....       | 7   | 1 | seq |
| .....aaggggaugcauCuuuagaua.....       | 5   | 1 | seq |
| .....aagAgaugcauuuuuagaua.....        | 3   | 1 | seq |
| .....aaggggaugcauuuuuagGua.....       | 1   | 1 | seq |
| .....Gaggggaugcauuuuuagaua.....       | 5   | 1 | seq |
| .....aaggggaugcauuuuuagauG.....       | 8   | 1 | seq |
| .....aCgggaugcauuuuuagaua.....        | 1   | 1 | seq |
| .....aaggggaugcauuuuuagaCa.....       | 1   | 1 | seq |
| .....aaggggaugUauuuuuuagauaa.....     | 1   | 1 | seq |
| .....aaggggaCgcauuuuuagauaa.....      | 1   | 1 | seq |
| .....aaggggaugcauuuuuagauaG.....      | 1   | 1 | seq |
| .....aaggggaugcauuuuuagauaa.....      | 55  | 0 | seq |
| .....aaggggaugcauuuuuagauaaa.....     | 21  | 0 | seq |
| .....aaggggaugcauuuuuagauaaaa.....    | 22  | 0 | seq |
| .....aaggggaugcauuuuuagauaGaag.....   | 1   | 1 | seq |
| .....aaggggaugcauuuuuagauaaaag.....   | 22  | 0 | seq |
| .....aaggggaugcauuuuuagauaaaagg.....  | 20  | 0 | seq |
| .....Caggggaugcauuuuuagauaaaagg.....  | 1   | 1 | seq |
| .....aaggggaugcauuuuuagauaaaaggc..... | 17  | 0 | seq |
| .....aggggaCgcauuuuuag.....           | 2   | 1 | seq |
| .....aggggaugcGuuuuuuag.....          | 1   | 1 | seq |
| .....aggggaugcauuuuuag.....           | 157 | 0 | seq |
| .....aggggaugcauCuuuag.....           | 1   | 1 | seq |
| .....Nggggaugcauuuuuag.....           | 2   | 1 | seq |
| .....aAggaugcauuuuuaga.....           | 1   | 1 | seq |
| .....aggggaugcauuuuuagC.....          | 1   | 1 | seq |
| .....aggggaugcauCuuuaga.....          | 1   | 1 | seq |
| .....aggggaugcauuuuuagG.....          | 12  | 1 | seq |
| .....aggggaugcauuuuGaga.....          | 2   | 1 | seq |
| .....aggggauACauuuuuuaga.....         | 1   | 1 | seq |
| .....aggggaugcauuuaGuaga.....         | 1   | 1 | seq |
| .....aggggaCgcauuuuuaga.....          | 1   | 1 | seq |
| .....aggggaCgcauuuuuaga.....          | 2   | 1 | seq |
| .....aggggaugcauuCauuaga.....         | 1   | 1 | seq |
| .....aggggaugUauuuuuuaga.....         | 1   | 1 | seq |
| .....aggggaugcaCuuuuuaga.....         | 2   | 1 | seq |
| .....aggggaugcauuuuuGga.....          | 3   | 1 | seq |
| .....aggggaugcGuuuuuuaga.....         | 4   | 1 | seq |
| .....aggggaugcauuuuuaga.....          | 927 | 0 | seq |
| .....aggggaugcauuuGuuaga.....         | 1   | 1 | seq |
| .....Nggggaugcauuuuuaga.....          | 2   | 1 | seq |
| .....aggggaugcauuuuuagaA.....         | 2   | 1 | seq |
| .....aggggaugcGuuuuuuagau.....        | 1   | 1 | seq |
| .....aggggaugcauuuuuagaC.....         | 77  | 1 | seq |
| .....aggggaugcauuuuuagau.....         | 1   | 1 | seq |
| .....aggggCugcauuuuuagau.....         | 1   | 1 | seq |
| .....aggggaugcauuuuuagau.....         | 526 | 0 | seq |
| .....aggggaugcauuuuuagaG.....         | 2   | 1 | seq |
| .....aggggaugUauuuuuuagau.....        | 5   | 1 | seq |
| .....aggggaugcauuAuuuagau.....        | 1   | 1 | seq |
| .....aggggaugcauGuuuuagau.....        | 1   | 1 | seq |
| .....Nggggaugcauuuuuagau.....         | 1   | 1 | seq |
| .....aggggaugcauuuuuagGu.....         | 4   | 1 | seq |
| .....aggggaugcauuuGuuagau.....        | 1   | 1 | seq |

## Mature

## Star

cgacacuuugaaagggau<sup>g</sup>cauuuauuagau<sup>aa</sup>aaaggcu<sup>ag</sup>cgcgagcu<sup>ug</sup>cucguuuau<sup>cu</sup>gguga<sup>au</sup>caugau<sup>aa</sup>cuc<sup>aa</sup>cggau<sup>c</sup>gcaca<sup>ac</sup>cccu<sup>g</sup>gcug<sup>g</sup>gcaa

|                                                                                         |      |   |     |
|-----------------------------------------------------------------------------------------|------|---|-----|
| .....agggau <sup>g</sup> cauuuauuagau.....                                              | 1    | 1 | seq |
| .....agggU <sup>g</sup> cauuuauuagau.....                                               | 2    | 1 | seq |
| .....aggU <sup>g</sup> cauuuauuagau.....                                                | 2    | 1 | seq |
| .....agggau <sup>U</sup> cauuuauuagau.....                                              | 2    | 1 | seq |
| .....agggga <sup>G</sup> cauuuauuagau.....                                              | 1    | 1 | seq |
| .....agggau <sup>g</sup> cauuuauuagau.....                                              | 2    | 1 | seq |
| .....agggau <sup>g</sup> cauuuauuagG <sup>u</sup> .....                                 | 5    | 1 | seq |
| .....agggau <sup>g</sup> cGuuuauuagau.....                                              | 8    | 1 | seq |
| .....aggU <sup>g</sup> cauuuauuagau.....                                                | 1    | 1 | seq |
| .....agggau <sup>g</sup> cauuuGuuagau.....                                              | 3    | 1 | seq |
| .....agggau <sup>g</sup> cauCuauuagau.....                                              | 2    | 1 | seq |
| .....agggau <sup>g</sup> cGuuuauuagau.....                                              | 1    | 1 | seq |
| .....agggau <sup>g</sup> cauuuauuG <sup>u</sup> au.....                                 | 3    | 1 | seq |
| .....agggau <sup>g</sup> cauuuauuagau <sup>U</sup> .....                                | 4    | 1 | seq |
| .....agggau <sup>g</sup> cauuuauuaga <sup>G</sup> .....                                 | 1    | 1 | seq |
| .....agggC <sup>u</sup> cauuuauuagau.....                                               | 1    | 1 | seq |
| .....a <sup>U</sup> ggau <sup>g</sup> cauuuauuagau.....                                 | 2    | 1 | seq |
| .....agggau <sup>U</sup> cauuuauuagau.....                                              | 2    | 1 | seq |
| .....ag <sup>U</sup> gaugcauuuauuagau.....                                              | 2    | 1 | seq |
| .....agggga <sup>C</sup> cauuuauuagau.....                                              | 3    | 1 | seq |
| .....agggau <sup>g</sup> cauuuauuaga <sup>C</sup> .....                                 | 13   | 1 | seq |
| .....Cgggaugcauuuauuagau.....                                                           | 1    | 1 | seq |
| .....agggau <sup>g</sup> cauuua <sup>U</sup> agau.....                                  | 1    | 1 | seq |
| .....agggau <sup>g</sup> cauuuauuag <sup>U</sup> .....                                  | 1    | 1 | seq |
| .....Ngggaugcauuuauuagau.....                                                           | 4    | 1 | seq |
| .....agggau <sup>g</sup> cauuCauuagau.....                                              | 1    | 1 | seq |
| .....agggau <sup>g</sup> cauuuauua <sup>U</sup> au.....                                 | 1    | 1 | seq |
| .....agggau <sup>g</sup> cauuuauuagau.....                                              | 1741 | 0 | seq |
| .....agg <sup>U</sup> gaugcauuuauuagau.....                                             | 1    | 1 | seq |
| .....agggau <sup>g</sup> cauuuauuagau <sup>G</sup> .....                                | 6    | 1 | seq |
| .....agggau <sup>g</sup> Uauuuauuagau.....                                              | 6    | 1 | seq |
| .....agggau <sup>g</sup> caCuuuauuagau.....                                             | 1    | 1 | seq |
| .....agggau <sup>g</sup> caGuuuauuagau.....                                             | 1    | 1 | seq |
| .....agggau <sup>g</sup> cauuuauuagau <sup>aa</sup> .....                               | 108  | 0 | seq |
| .....agggau <sup>g</sup> cauuuauGagau <sup>aa</sup> .....                               | 1    | 1 | seq |
| .....agggau <sup>g</sup> cGuuuauuagau <sup>aa</sup> .....                               | 1    | 1 | seq |
| .....agggau <sup>g</sup> caGuuuauuagau <sup>aa</sup> .....                              | 1    | 1 | seq |
| .....agggau <sup>g</sup> cauuuauuagau <sup>aaa</sup> .....                              | 66   | 0 | seq |
| .....agggau <sup>g</sup> cauuuauuaga <sup>C</sup> aaa.....                              | 1    | 1 | seq |
| .....agggau <sup>g</sup> cauuuau <sup>U</sup> agau <sup>aaa</sup> .....                 | 1    | 1 | seq |
| .....ag <sup>U</sup> gaugcauuuauuagau <sup>aaa</sup> .....                              | 1    | 1 | seq |
| .....agggau <sup>g</sup> cauuGauuagau <sup>aaaa</sup> .....                             | 1    | 1 | seq |
| .....agggau <sup>g</sup> cauuuauuagau <sup>aaaa</sup> .....                             | 55   | 0 | seq |
| .....Ngggaugcauuuauuagau <sup>aaaa</sup> .....                                          | 1    | 1 | seq |
| .....agggau <sup>g</sup> cauuuauGagau <sup>aaaa</sup> .....                             | 1    | 1 | seq |
| .....Ugggaugcauuuauuagau <sup>aaaag</sup> .....                                         | 1    | 1 | seq |
| .....agggga <sup>C</sup> cauuuauuagau <sup>aaaag</sup> .....                            | 1    | 1 | seq |
| .....agggau <sup>g</sup> Uauuuauuagau <sup>aaaag</sup> .....                            | 1    | 1 | seq |
| .....agggau <sup>g</sup> cauuuauuagau <sup>aaaag</sup> .....                            | 54   | 0 | seq |
| .....agggau <sup>g</sup> cauuuGuuagau <sup>aaaag</sup> .....                            | 1    | 1 | seq |
| .....agggau <sup>g</sup> cauuuauuagau <sup>aaaag</sup> <sup>U</sup> .....               | 1    | 1 | seq |
| .....agggga <sup>C</sup> cauuuauuagau <sup>aaaagg</sup> .....                           | 1    | 1 | seq |
| .....agggau <sup>g</sup> cGuuuauuagau <sup>aaaagg</sup> .....                           | 1    | 1 | seq |
| .....agggau <sup>g</sup> cauuuauuagau <sup>aaaagg</sup> .....                           | 32   | 0 | seq |
| .....agggau <sup>g</sup> cauuuauuagau <sup>aaaagg</sup> <sup>C</sup> .....              | 19   | 0 | seq |
| .....Ggggaugcauuuauuagau <sup>aaaagg</sup> <sup>C</sup> .....                           | 1    | 1 | seq |
| .....agggau <sup>g</sup> cauuuauuagau <sup>aaaagg</sup> <sup>C</sup> <sup>A</sup> ..... | 1    | 1 | seq |
| .....agggau <sup>g</sup> cauuuauuagau <sup>aaaagg</sup> <sup>C</sup> <sup>U</sup> ..... | 2    | 0 | seq |
| .....gggaugcauuuauuG <sup>u</sup> .....                                                 | 3    | 1 | seq |
| .....gggaugcauuuauuaga.....                                                             | 254  | 0 | seq |
| .....gggaugcauuuauuag <sup>G</sup> .....                                                | 4    | 1 | seq |
| .....ggga <sup>U</sup> gauuuauuaga.....                                                 | 1    | 1 | seq |
| .....Aggaugcauuuauuaga.....                                                             | 1    | 1 | seq |
| .....gggaugcGuuuauuaga.....                                                             | 3    | 1 | seq |
| .....gggaugcauuuauuagau.....                                                            | 126  | 0 | seq |
| .....gggaugcauuuauuag <sup>G</sup> .....                                                | 1    | 1 | seq |
| .....gggaugcaCuuuauuagau.....                                                           | 1    | 1 | seq |
| .....gggaugcauuuauuG <sup>u</sup> au.....                                               | 2    | 1 | seq |
| .....gggaugcauuuauuag <sup>U</sup> .....                                                | 1    | 1 | seq |
| .....gggaugcauuuauuag <sup>C</sup> .....                                                | 17   | 1 | seq |

## Mature

## Star

cgacacuuugaaagggaugcauuuuuagauaaaaggcuagcgcgagcuugcucguuuuauucuggugaaucaugauaacucaacggauCGcacaacccuugcugggcaa

|                                      |     |   |     |
|--------------------------------------|-----|---|-----|
| .....gggaugcauuuuuagGua.....         | 1   | 1 | seq |
| .....gggaugcauuuuuagauU.....         | 1   | 1 | seq |
| .....gggaugcauuuuuGagaua.....        | 1   | 1 | seq |
| .....gggaugcauuuuuagCa.....          | 3   | 1 | seq |
| .....gggaugcauuuuuagaua.....         | 451 | 0 | seq |
| .....gggaugcauuuuuGgaua.....         | 1   | 1 | seq |
| .....Aggaugcauuuuuagaua.....         | 3   | 1 | seq |
| .....gggaugcauuCauuagaua.....        | 1   | 1 | seq |
| .....gggaugcauuuuuagauG.....         | 2   | 1 | seq |
| .....gggaugUauuuuagaua.....          | 1   | 1 | seq |
| .....gggaugcauCauuagaua.....         | 1   | 1 | seq |
| .....gggaCgcauuuuuagaua.....         | 1   | 1 | seq |
| .....gggaugcauuuuuagauaa.....        | 20  | 0 | seq |
| .....gggaugcauuuuuagUuaa.....        | 1   | 1 | seq |
| .....gggaugCGuuuuuagauaa.....        | 1   | 1 | seq |
| .....Aggaugcauuuuuagauaa.....        | 1   | 1 | seq |
| .....gggaCgcauuuuuagauaa.....        | 1   | 1 | seq |
| .....gggaugcauuuuuagauaG.....        | 1   | 1 | seq |
| .....Nggaugcauuuuuagauaaaa.....      | 1   | 1 | seq |
| .....gggaugcauuCauuagauaaaa.....     | 1   | 1 | seq |
| .....gggaugcauuuuuagauaaaa.....      | 15  | 0 | seq |
| .....gggaugcauuuuuagauaaaaa.....     | 9   | 0 | seq |
| .....gggaugcauuuuuagGuaaaaa.....     | 1   | 1 | seq |
| .....gggaugcauuuuuagauaaaaag.....    | 13  | 0 | seq |
| .....gggaugcauuuuuagauaaaaagg.....   | 5   | 0 | seq |
| .....gggaugcauuuuuagauaaaaaggc.....  | 11  | 0 | seq |
| .....gggaugcauuuuuagauaaaaaggcu..... | 4   | 0 | seq |
| .....ggaugcauuuuuagac.....           | 1   | 1 | seq |
| .....ggaugcauuuuuagGu.....           | 1   | 1 | seq |
| .....ggaugcauuuuuagacG.....          | 1   | 1 | seq |
| .....ggaugcauuuuuagau.....           | 16  | 0 | seq |
| .....Agaugcauuuuuagaua.....          | 1   | 1 | seq |
| .....ggaugcauuuuuagauG.....          | 1   | 1 | seq |
| .....ggaugcauuuuuagaua.....          | 70  | 0 | seq |
| .....ggaugcauuuuuagauaa.....         | 7   | 0 | seq |
| .....ggaugcauuuuuagauaaaa.....       | 3   | 0 | seq |
| .....ggaugCGuuuuuagauaaaa.....       | 2   | 1 | seq |
| .....ggaugcauuuuuagGuaaa.....        | 1   | 1 | seq |
| .....ggaugcauuuuuagauaaaaa.....      | 4   | 0 | seq |
| .....ggaugcauuuuuagauaaaaag.....     | 2   | 0 | seq |
| .....ggaugcauuuuuagauaaaaagg.....    | 4   | 0 | seq |
| .....ggaugcauuuuuagauaaaaaggc.....   | 2   | 0 | seq |
| .....gaugcauuuuuagauG.....           | 1   | 1 | seq |
| .....gaAgcauuuuuagaua.....           | 1   | 1 | seq |
| .....gaugcaCuuuuagaua.....           | 1   | 1 | seq |
| .....Caugcauuuuuagaua.....           | 1   | 1 | seq |
| .....Uaugcauuuuuagaua.....           | 1   | 1 | seq |
| .....gaugcauuGauuagaua.....          | 1   | 1 | seq |
| .....gaugcauuuuuagCa.....            | 1   | 1 | seq |
| .....gaugcauuuuuagaua.....           | 211 | 0 | seq |
| .....Aaugcauuuuuagaua.....           | 1   | 1 | seq |
| .....gaugcauuuuuagCa.....            | 1   | 1 | seq |
| .....gaugCGuuuuuagauaa.....          | 1   | 1 | seq |
| .....gaugcauuuuuagauaa.....          | 13  | 0 | seq |
| .....gaugcauuuuuagauaG.....          | 1   | 1 | seq |
| .....Caugcauuuuuagauaaaa.....        | 1   | 1 | seq |
| .....gaugcauuuuuagauaaaaa.....       | 13  | 0 | seq |
| .....gaugcauuuuuagauaaaaa.....       | 6   | 0 | seq |
| .....gaugcauuuuuagauaaaaag.....      | 8   | 0 | seq |
| .....gaugcauuuuuagauaaaaagg.....     | 6   | 0 | seq |
| .....gaugcauuuuuagauaaaaGgg.....     | 1   | 1 | seq |
| .....gaugcauuuuuagauaaaaaggc.....    | 8   | 0 | seq |
| .....augcauuuuuagauaa.....           | 15  | 0 | seq |
| .....augcauuuuuagauaaaa.....         | 5   | 0 | seq |
| .....augcauuuuuagauaaaaa.....        | 6   | 0 | seq |
| .....augcauuuuuagauaaaaag.....       | 10  | 0 | seq |
| .....augcauuuuuagauaaaaagg.....      | 15  | 0 | seq |
| .....augcauuuuuagauaaaaaggc.....     | 2   | 0 | seq |
| .....augcauuuuuagauaaaaGggc.....     | 1   | 1 | seq |
| .....augcauuuuuagauaaaaaggcu.....    | 1   | 0 | seq |

## Mature

## Star

cgacacuuugaaaggggaugcauuuuuagauaaaagggcuagcgcgagcguugcucguuuauucuggugaaucaugauaaacucaacgggaucgcacaaacccuugugcuggcaa

|                                       |    |   |     |
|---------------------------------------|----|---|-----|
| .....augcauuuuuagauaaaagAcu.....      | 1  | 1 | seq |
| .....augcauuuuuagauaaaagggcuGgcg..... | 1  | 1 | seq |
| .....ugcauuuuuagauaaaa.....           | 2  | 0 | seq |
| .....ugcauuuuuagauaaaa.....           | 6  | 0 | seq |
| .....ugcauuuuuGgauaaaa.....           | 1  | 1 | seq |
| .....ugcauuuuuagauaaaag.....          | 5  | 0 | seq |
| .....ugcauuuuuagauaaaagA.....         | 1  | 1 | seq |
| .....ugcauuuuuagauaaaagg.....         | 6  | 0 | seq |
| .....ugcauuuuuagauaaaagggcu.....      | 3  | 0 | seq |
| .....ugcauuuuuagauaaaagggcA.....      | 1  | 1 | seq |
| .....gcauuuuuagauaaaa.....            | 1  | 0 | seq |
| .....gcauuuuuagauaaaag.....           | 1  | 0 | seq |
| .....gcauuuuuagauaaaagA.....          | 1  | 1 | seq |
| .....gcauuuuuagauaaaagggc.....        | 1  | 0 | seq |
| .....gcauuuuuagauaaaagggcA.....       | 1  | 1 | seq |
| .....gcauuuuuagauaaaagggcuG.....      | 1  | 1 | seq |
| .....gcauuuuuagauaaaagggcuGg.....     | 1  | 1 | seq |
| .....gcauuuuuagauaaaagggcuGgcg.....   | 1  | 1 | seq |
| .....cauuuuuagauaaaag.....            | 2  | 0 | seq |
| .....cauuuuuagauaaaagg.....           | 4  | 0 | seq |
| .....cauuuuuagauaaaagggc.....         | 26 | 0 | seq |
| .....cauuuuuagauaaaagggAu.....        | 1  | 1 | seq |
| .....cauuuuuagauaaaagggcA.....        | 2  | 1 | seq |
| .....cauuuuuagauaaaagggcu.....        | 5  | 0 | seq |
| .....cauuuuuagauaaaagggcuG.....       | 1  | 1 | seq |
| .....cauuuuuagauaaaagggcuGgcg.....    | 1  | 1 | seq |
| .....cauuuuuagauaaaagggcuGgcgcg.....  | 1  | 1 | seq |
| .....auuuuuuagauaaaagg.....           | 6  | 0 | seq |
| .....auuuuuuagauaaaagA.....           | 2  | 1 | seq |
| .....auuuuuuagauaaaagggc.....         | 7  | 0 | seq |
| .....auuuuuuagauaaaagggcA.....        | 2  | 1 | seq |
| .....auuuuuuagauaaaagggcu.....        | 6  | 0 | seq |
| .....auuuuuuagauaaaagggcuG.....       | 1  | 1 | seq |
| .....uuuuuuuagauaaaagggc.....         | 15 | 0 | seq |
| .....uuuuuuuagauaaaagggcA.....        | 1  | 1 | seq |
| .....Cuuuuuuagauaaaagggcu.....        | 1  | 1 | seq |
| .....uuuuuuuagauaaaagggcu.....        | 11 | 0 | seq |
| .....uuuuuuuagauaaaagggcGa.....       | 1  | 1 | seq |
| .....uuuuuuuagauaaaagggcuG.....       | 6  | 1 | seq |
| .....uuuuuuuagauaaaagggcuGg.....      | 2  | 1 | seq |
| .....uuuuuuuagauaaaagggcuGgcg.....    | 2  | 1 | seq |
| .....uuuuuuuagauaaaagggcu.....        | 4  | 0 | seq |
| .....uuuuuuuagauaaaagggcuG.....       | 3  | 1 | seq |
| .....uuuuuuuagauaaaagggcuGg.....      | 1  | 1 | seq |
| .....uuuuuuuagauaaaagggcuGgcg.....    | 1  | 1 | seq |
| .....uuuuuuuagauaaaagggcGa.....       | 1  | 1 | seq |
| .....uuuuuuuagauaaaagggcuG.....       | 1  | 1 | seq |
| .....uuuuuuuagauaaaagggcuGgcg.....    | 2  | 1 | seq |
| .....uuuuuuuagauaaaagggcuGgcg.....    | 4  | 1 | seq |
| .....uuuuuuuagauaaaagggcuGgcgcg.....  | 2  | 1 | seq |
| .....uagauaaaagggcuGgcgcg.....        | 1  | 1 | seq |
| .....agauaaaagggcuGgcgcg.....         | 2  | 1 | seq |
| .....gauaaaagggcuGgcgcg.....          | 3  | 1 | seq |
| .....uuauucGggugaaucaug.....          | 1  | 1 | seq |
| .....aucGggugaaucaugaua.....          | 4  | 1 | seq |
| .....aucGggugaaucaugauaac.....        | 2  | 1 | seq |
| .....aucGggugaaucaugauaacu.....       | 4  | 1 | seq |
| .....aucGggugaaucaugauaacuc.....      | 2  | 1 | seq |
| .....ucGggugaaucaugaua.....           | 3  | 1 | seq |
| .....ucuggAgaaucaugaua.....           | 1  | 1 | seq |
| .....ucAgggugaaucaugaua.....          | 4  | 1 | seq |
| .....ucuggugaGucaugaua.....           | 1  | 1 | seq |
| .....ucuggugaaucaugaua.....           | 16 | 0 | seq |
| .....ucuggugaaucaugauaa.....          | 2  | 0 | seq |
| .....ucAgggugaaucaugauaac.....        | 1  | 1 | seq |
| .....ucuggugaaucaugauaac.....         | 3  | 0 | seq |
| .....ucGggugaaucaugauaacu.....        | 1  | 1 | seq |
| .....ucuggugaaucaugauaacu.....        | 4  | 0 | seq |
| .....ucAgggugaaucaugauaacu.....       | 3  | 1 | seq |
| .....ucAgggugaaucaugauaacuc.....      | 4  | 1 | seq |

## Mature

## Star

cgacacuuugaaagggaucauuuuuagauaaaaggcuagcgcgagcuugcucguuuauucvggugaaucaugauaacucaacggauccgacacacccuugugcuggcaa

|                                       |     |   |     |
|---------------------------------------|-----|---|-----|
| .....ucGggugaaucaugauaacuc.....       | 5   | 1 | seq |
| .....ucuggugaaucaugauaacuc.....       | 15  | 0 | seq |
| .....ucGggugaaucaugauaacuca.....      | 2   | 1 | seq |
| .....ucAggugaaucaugauaacuca.....      | 1   | 1 | seq |
| .....ucuggugaaucaugauaacuca.....      | 3   | 0 | seq |
| .....cuggugaaucaugauaaa.....          | 2   | 0 | seq |
| .....cGggugaaucaugauaaa.....          | 2   | 1 | seq |
| .....cuggugaaucaugauaac.....          | 3   | 0 | seq |
| .....cuggugaaucaugauaacA.....         | 1   | 1 | seq |
| .....cuggugaaucaugauaacC.....         | 1   | 1 | seq |
| .....cuggugaaucaugauaacu.....         | 4   | 0 | seq |
| .....cGggugaaucaugauaacu.....         | 2   | 1 | seq |
| .....cuggugaaucaugauaacuA.....        | 1   | 1 | seq |
| .....cuggugaaucaugauaacuc.....        | 13  | 0 | seq |
| .....cGggugaaucaugauaacuc.....        | 1   | 1 | seq |
| .....cAggugaaucaugauaacuc.....        | 2   | 1 | seq |
| .....cAggugaaucaugauaacuca.....       | 3   | 1 | seq |
| .....cGggugaaucaugauaacuca.....       | 1   | 1 | seq |
| .....cuggugaaucaugauaacuca.....       | 4   | 0 | seq |
| .....uggugaaucaugauaac.....           | 1   | 0 | seq |
| .....Gggugaaucaugauaacu.....          | 3   | 1 | seq |
| .....uggugaaucaugauaacu.....          | 1   | 0 | seq |
| .....Nggugaaucaugauaacu.....          | 1   | 1 | seq |
| .....Gggugaaucaugauaacuc.....         | 5   | 1 | seq |
| .....Aggugaaucaugauaacuc.....         | 3   | 1 | seq |
| .....uggugaaucaugauaacuc.....         | 6   | 0 | seq |
| .....Nggugaaucaugauaacuc.....         | 2   | 1 | seq |
| .....ggugaaucaugauaacC.....           | 3   | 1 | seq |
| .....ggugaaucaugauaacu.....           | 23  | 0 | seq |
| .....ggugaaucaugauaacA.....           | 1   | 1 | seq |
| .....ggugaCucaugauaacuc.....          | 1   | 1 | seq |
| .....ggugaaucaugauaacuc.....          | 469 | 0 | seq |
| .....ggugaaucaugauaacuG.....          | 1   | 1 | seq |
| .....ggGgaaucaugauaacuc.....          | 1   | 1 | seq |
| .....ggugaaucaugGuaacuc.....          | 1   | 1 | seq |
| .....Cgugaaucaugauaacuc.....          | 1   | 1 | seq |
| .....ggugaauucGugaauaacuc.....        | 1   | 1 | seq |
| .....ggugaaucaugauaaGcuc.....         | 1   | 1 | seq |
| .....ggugaaucaugauaacCc.....          | 3   | 1 | seq |
| .....ggugaaucaugauaacuA.....          | 1   | 1 | seq |
| .....ggugGaucaugauaacuc.....          | 1   | 1 | seq |
| .....ggugaGucaugauaacuc.....          | 2   | 1 | seq |
| .....ggugaaucaugauaacuca.....         | 239 | 0 | seq |
| .....ggugaaucaugGuaacuca.....         | 1   | 1 | seq |
| .....ggugaaucaugauaacucC.....         | 17  | 1 | seq |
| .....ggugaauucGugaauaacuca.....       | 1   | 1 | seq |
| .....ggugaaucauAuuaacuca.....         | 2   | 1 | seq |
| .....ggugaauUaugauaacuca.....         | 1   | 1 | seq |
| .....ggugaaucaugUuaacuca.....         | 1   | 1 | seq |
| .....ggAgaaucaugauaacuca.....         | 1   | 1 | seq |
| .....ggugaaucaugauaacucCa.....        | 3   | 1 | seq |
| .....ggugaaucaugauaacucaG.....        | 1   | 1 | seq |
| .....ggugaaucaugauaacucaa.....        | 2   | 0 | seq |
| .....ggugaaucaugauaacucaac.....       | 2   | 0 | seq |
| .....ggugaaucaugauaacucaacA.....      | 1   | 1 | seq |
| .....ggugaaucaugauaacucaacg.....      | 3   | 0 | seq |
| .....ggugaaucaugauaacucCacg.....      | 1   | 1 | seq |
| .....ggugaaucaugauaacucaacgg.....     | 2   | 0 | seq |
| .....ggugaaucaugauaacucaacgga.....    | 3   | 0 | seq |
| .....ggugaaucaugauaacucaacgggauc..... | 3   | 0 | seq |
| .....Uugaaucaugauaacuc.....           | 1   | 1 | seq |
| .....gugaaucaugauaacuA.....           | 3   | 1 | seq |
| .....gugaaucaugauGacuc.....           | 1   | 1 | seq |
| .....gugaaucaugauaacAc.....           | 1   | 1 | seq |
| .....gugaaucaugauaacuc.....           | 283 | 0 | seq |
| .....gGgaaucaugauaacuc.....           | 2   | 1 | seq |
| .....gugaaucaugauaacCc.....           | 2   | 1 | seq |
| .....Nugaaucaugauaacuc.....           | 1   | 1 | seq |
| .....gCgaaucaugauaacuc.....           | 1   | 1 | seq |
| .....gugaaucaugauaacGc.....           | 1   | 1 | seq |

## Mature

## Star

cgacacuuugaaagggaucauuuauuagauaaaaggcuagcgcgagcuugcucguuuauucuggugaaucaugauaaacucaacggauccgacacaacccuugugcuggcaa

|                                       |     |   |     |
|---------------------------------------|-----|---|-----|
| .....gugaaucaugauaacGca.....          | 1   | 1 | seq |
| .....gugaaucaugGuaacuca.....          | 1   | 1 | seq |
| .....gugaaucaugauaaacucC.....         | 6   | 1 | seq |
| .....gugaaucaugauaaacuca.....         | 1   | 1 | seq |
| .....gugaaucaugauaaacuca.....         | 120 | 0 | seq |
| .....gugaaucaugaCaacuca.....          | 1   | 1 | seq |
| .....gugaaucaugauaacucCa.....         | 3   | 1 | seq |
| .....gugaaucaugauaacucaac.....        | 1   | 0 | seq |
| .....gugaaucaugauaacucaGc.....        | 1   | 1 | seq |
| .....gugaaucaugauaacucaacC.....       | 1   | 1 | seq |
| .....gugaaucaugauaacucCacg.....       | 1   | 1 | seq |
| .....gugaaucaugauaacucaacg.....       | 8   | 0 | seq |
| .....gugaaucaugauaacucaacA.....       | 1   | 1 | seq |
| .....gugaaucaugauaacucaCcg.....       | 1   | 1 | seq |
| .....gugaaucaugauaacucaacgg.....      | 3   | 0 | seq |
| .....gugaaucaugauaacucaacgA.....      | 2   | 1 | seq |
| .....gugaaucaugauaacucaacgU.....      | 1   | 1 | seq |
| .....gugaaucaugauaacucaacggau.....    | 1   | 0 | seq |
| .....gugaaucaugauaacucaacggauC.....   | 1   | 1 | seq |
| .....ugaaucaugauaacAca.....           | 1   | 1 | seq |
| .....ugaaucaugauaacuGa.....           | 1   | 1 | seq |
| .....ugaaucaugGuaacuca.....           | 1   | 1 | seq |
| .....ugaaucaugauaacucC.....           | 7   | 1 | seq |
| .....ugaaucaugauaacuca.....           | 101 | 0 | seq |
| .....ugaaucaugauaacucCa.....          | 1   | 1 | seq |
| .....ugaaucaugauaacucaacg.....        | 2   | 0 | seq |
| .....ugaaucaugauaacucCacg.....        | 1   | 1 | seq |
| .....ugaaucaugauaacucaacgg.....       | 4   | 0 | seq |
| .....ugaaucaugauaacuGaacggga.....     | 1   | 1 | seq |
| .....ugaaucaugauaacucaacggga.....     | 3   | 0 | seq |
| .....ugaaucaugauaacucaGgga.....       | 1   | 1 | seq |
| .....gaaucaugauaacucCa.....           | 1   | 1 | seq |
| .....gaaucaugauaacucaacg.....         | 4   | 0 | seq |
| .....gaaucaugauaacucCacg.....         | 1   | 1 | seq |
| .....gaaucaugauaacucaacgU.....        | 1   | 1 | seq |
| .....gaaucaugauaacucaacgg.....        | 3   | 0 | seq |
| .....gaaucaugauaacucaacggga.....      | 2   | 0 | seq |
| .....gaaucaugauaacucaacgggaC.....     | 1   | 1 | seq |
| .....gaaucaugauaacucaacgggaucgca..... | 1   | 0 | seq |
| .....aaucaugauaacucCac.....           | 1   | 1 | seq |
| .....aaucaugauaacucaacg.....          | 9   | 0 | seq |
| .....aaucaugauaacucaacgg.....         | 8   | 0 | seq |
| .....Caucaugauaacucaacgg.....         | 1   | 1 | seq |
| .....aaucaugauaacucaacggU.....        | 1   | 1 | seq |
| .....aaucaugauaacucaacggga.....       | 1   | 0 | seq |
| .....aaucaugauaacucaacgggau.....      | 1   | 0 | seq |
| .....aaucaugauaacucaacgggauc.....     | 1   | 0 | seq |
| .....aaucaugauaacucaacgggaucg.....    | 1   | 0 | seq |
| .....aaucaugauaacucaacgggaucgca.....  | 1   | 0 | seq |
| .....aucaugauaacucaacg.....           | 6   | 0 | seq |
| .....aucaugauaacucCacg.....           | 1   | 1 | seq |
| .....aucaugauaacucaacgg.....          | 19  | 0 | seq |
| .....aucaugauaacucCacgg.....          | 1   | 1 | seq |
| .....aucaugauaacucaacggga.....        | 8   | 0 | seq |
| .....aucaugauaacucCacggga.....        | 1   | 1 | seq |
| .....aCcaugauaacucaacggga.....        | 1   | 1 | seq |
| .....aucaugauaacucaacgggau.....       | 3   | 0 | seq |
| .....aucaugauaacucaacgggaA.....       | 2   | 1 | seq |
| .....aucaugauaacucaacgggauc.....      | 2   | 0 | seq |
| .....aCcaugauaacucaacgggauc.....      | 1   | 1 | seq |
| .....aucaugauaacucaacgggaucg.....     | 4   | 0 | seq |
| .....aucaugauaacucaacgggaucgc.....    | 1   | 0 | seq |
| .....aucaugauaacucaacgggaucgUa.....   | 1   | 1 | seq |
| .....Ccaugauaacucaacgg.....           | 1   | 1 | seq |
| .....ucaugauaacucaacgA.....           | 2   | 1 | seq |
| .....ucaugauaacucaacgg.....           | 21  | 0 | seq |
| .....ucaugauaacucaacggga.....         | 18  | 0 | seq |
| .....ucaugauaacucCacggga.....         | 1   | 1 | seq |
| .....ucaugauaacucaacgggau.....        | 3   | 0 | seq |
| .....ucaugauaacucaacgggauc.....       | 2   | 0 | seq |

## Mature

## Star

cgacacuuugaaagggaugcauuuauuagauaaaaggcuagcgcgagcuugcucguuuauaucuggugaaucaugauaacucaacggauccgacaccccuugucuggcaa

|                                    |   |   |     |
|------------------------------------|---|---|-----|
| .....ucaugauaacucaacggauCG.....    | 4 | 0 | seq |
| .....ucaugauaacucCacggauCG.....    | 1 | 1 | seq |
| .....ucaugauaacucaacggauCGc.....   | 1 | 0 | seq |
| .....ucaugauaacucaacggauCGca.....  | 4 | 0 | seq |
| .....caugauaacucaacgga.....        | 8 | 0 | seq |
| .....caugauaacucCacgga.....        | 1 | 1 | seq |
| .....caugauaacucaacggau.....       | 1 | 0 | seq |
| .....caugauaacucaacggauC.....      | 2 | 0 | seq |
| .....caugauaacucaacggauCG.....     | 1 | 0 | seq |
| .....caugauaacucaacggauCA.....     | 1 | 1 | seq |
| .....caugauaacucaacggauCGca.....   | 2 | 0 | seq |
| .....caugauaacucaacggauCGcG.....   | 1 | 1 | seq |
| .....augauaacucaacggau.....        | 1 | 0 | seq |
| .....augauaacucaacggauC.....       | 3 | 0 | seq |
| .....augauaacucaacggauU.....       | 1 | 1 | seq |
| .....augauaacucaacggauCA.....      | 2 | 1 | seq |
| .....augauaacucaacggauCC.....      | 1 | 1 | seq |
| .....augauaacucaacggauCGca.....    | 1 | 0 | seq |
| .....augauaacucaacggauCGcac.....   | 1 | 0 | seq |
| .....ugauaacucaacggauC.....        | 5 | 0 | seq |
| .....ugauaacucaacggauCG.....       | 7 | 0 | seq |
| .....ugauaacucaacggauCGca.....     | 1 | 0 | seq |
| .....ugauaacucaacggauCGcac.....    | 3 | 0 | seq |
| .....ugauaacucaacggauCGcacG.....   | 1 | 1 | seq |
| .....gauaacucaacggauCC.....        | 1 | 1 | seq |
| .....gauaacucaacggauCG.....        | 6 | 0 | seq |
| .....gauaacucaacggauCGc.....       | 1 | 0 | seq |
| .....gauaacucaacggauCGca.....      | 2 | 0 | seq |
| .....gauaacucaacggauCGcacG.....    | 1 | 1 | seq |
| .....auaacucaacggauCGca.....       | 4 | 0 | seq |
| .....auaacucaacggauCGcac.....      | 2 | 0 | seq |
| .....uaacucaGcggaucgca.....        | 1 | 1 | seq |
| .....uaacucaacggauCGcG.....        | 1 | 1 | seq |
| .....uaacucaacggauCGca.....        | 5 | 0 | seq |
| .....uaacucaacggauCGcacG.....      | 2 | 1 | seq |
| .....uaacucaacggauCGcacGa.....     | 2 | 1 | seq |
| .....acggauCGcacaCcccu.....        | 1 | 1 | seq |
| .....acggauCGcacGaccuu.....        | 9 | 1 | seq |
| .....acggauCGcacGaccuu.....        | 1 | 1 | seq |
| .....acggauCGcacGaccuug.....       | 1 | 1 | seq |
| .....acggauCGcacGaccuugug.....     | 3 | 1 | seq |
| .....acggauCGcacGaccuugugcu.....   | 1 | 1 | seq |
| .....acggauCGcacGaccuugugcug.....  | 2 | 1 | seq |
| .....cggaucgcacGaccuu.....         | 1 | 1 | seq |
| .....cggaucgcacGaccuug.....        | 2 | 1 | seq |
| .....cggaucgcacGaccuugug.....      | 1 | 1 | seq |
| .....cggaucgcacGaccuugugcu.....    | 1 | 1 | seq |
| .....cggaucgcacGaccuugugcuggc..... | 1 | 1 | seq |

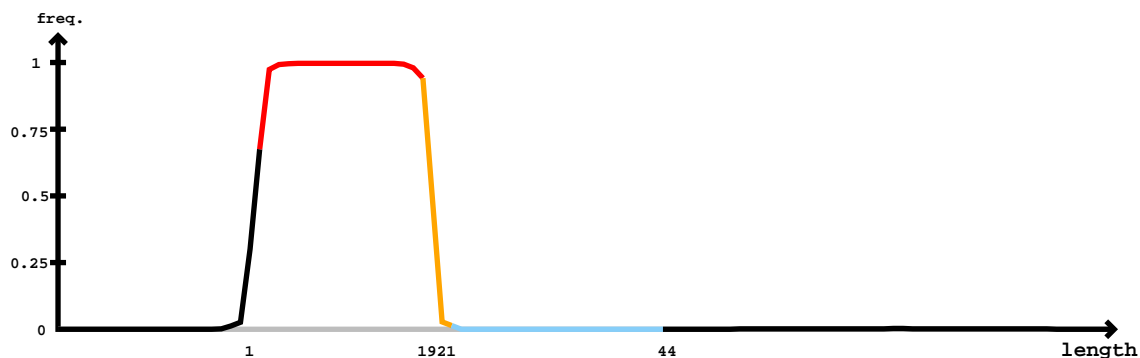

|    | Mature                                                                                                        | Star |     |     |        |
|----|---------------------------------------------------------------------------------------------------------------|------|-----|-----|--------|
| 5' | cacugagggauucgaaagcugccgggaggggaagcgaaagcaucuuaaacuaccaggugggagagagaagaaauugggacccaucugaagguucucauggagaguucga |      | -3' | exp |        |
|    | .....((((.....((.....(((.....((.....)))..)))..)))..((((.....)))..)))..reads                                   |      |     | mm  | sample |
|    | .....aUgacugccgggaggggaagc.....                                                                               | 1    |     | 1   | seq    |
|    | .....agaUugccgggaggggaag.....                                                                                 | 2    |     | 1   | seq    |
|    | .....agaUugccgggaggggaagc.....                                                                                | 2    |     | 1   | seq    |
|    | .....agaUugccgggaggggaagcg.....                                                                               | 1    |     | 1   | seq    |
|    | .....aAacugccgggaggggaagcg.....                                                                               | 2    |     | 1   | seq    |
|    | .....gaUugccgggaggggaagc.....                                                                                 | 2    |     | 1   | seq    |
|    | .....Aacugccgggaggggaagc.....                                                                                 | 1    |     | 1   | seq    |
|    | .....gaUugccgggaggggaagcg.....                                                                                | 3    |     | 1   | seq    |
|    | .....Aacugccgggaggggaagcga.....                                                                               | 1    |     | 1   | seq    |
|    | .....gaUugccgggaggggaagcga.....                                                                               | 2    |     | 1   | seq    |
|    | .....acugccgggaggggaagU.....                                                                                  | 1    |     | 1   | seq    |
|    | .....acugccgggaggggaagc.....                                                                                  | 2    |     | 0   | seq    |
|    | .....acugccgggaggggaagcg.....                                                                                 | 2    |     | 0   | seq    |
|    | .....aUugccgggaggggaagcga.....                                                                                | 159  |     | 1   | seq    |
|    | .....acugccgggaggggaagcgG.....                                                                                | 5    |     | 1   | seq    |
|    | .....acugccgggaggggaagcga.....                                                                                | 1    |     | 0   | seq    |
|    | .....acugccgggaggggaagcgGa.....                                                                               | 6    |     | 1   | seq    |
|    | .....aUugccgggaggggaagcgaa.....                                                                               | 2    |     | 1   | seq    |
|    | .....cugccgggaggggaagcg.....                                                                                  | 7    |     | 0   | seq    |
|    | .....Gugccgggaggggaagcg.....                                                                                  | 2    |     | 1   | seq    |
|    | .....Augccgggaggggaagcg.....                                                                                  | 2    |     | 1   | seq    |
|    | .....Nugccgggaggggaagcg.....                                                                                  | 5    |     | 1   | seq    |
|    | .....cugccgggaggggaagUg.....                                                                                  | 1    |     | 1   | seq    |
|    | .....cugccgggaggggaagcgG.....                                                                                 | 9    |     | 1   | seq    |
|    | .....Nugccgggaggggaagcga.....                                                                                 | 1    |     | 1   | seq    |
|    | .....Uugccgggaggggaagcga.....                                                                                 | 194  |     | 1   | seq    |
|    | .....cugccgggaggggaagcga.....                                                                                 | 1    |     | 0   | seq    |
|    | .....Uugccgggaggggaagcgaa.....                                                                                | 6    |     | 1   | seq    |
|    | .....cugccgggaggggaagcgaG.....                                                                                | 1    |     | 1   | seq    |
|    | .....cugccgggaggggaagcgGa.....                                                                                | 14   |     | 1   | seq    |
|    | .....ugccgggaggggUagcga.....                                                                                  | 2    |     | 1   | seq    |
|    | .....ugccgggaggggaagcgU.....                                                                                  | 26   |     | 1   | seq    |
|    | .....Cgcccgggaggggaagcga.....                                                                                 | 1    |     | 1   | seq    |
|    | .....ugcccgggaggggaagcgC.....                                                                                 | 9    |     | 1   | seq    |



# Mature Star

|                    |                         |                          |                     |                    |                |     |   |     |
|--------------------|-------------------------|--------------------------|---------------------|--------------------|----------------|-----|---|-----|
| cacugagggauucgaaga | cugccgggagggaaagcgaa    | agcaucuuaaacuaccagguggga | agagaugagaaauugggac | caucugaagguc       | cauggagaguucga |     |   |     |
| .....              | .ugccgggagggaaagcga     | .....                    |                     |                    |                | 134 | 0 | seq |
| .....              | .ugcUgggagggaaagcga     | .....                    |                     |                    |                | 1   | 1 | seq |
| .....              | .ugccggAagggaaagcga     | .....                    |                     |                    |                | 1   | 1 | seq |
| .....              | .ugccgggagggaaagcgaa    | .....                    |                     |                    |                | 4   | 0 | seq |
| .....              | .ugccgggagggaaagcgaU    | .....                    |                     |                    |                | 1   | 1 | seq |
| .....              | .ugccgggagggaaagcgUa    | .....                    |                     |                    |                | 2   | 1 | seq |
| .....              | .ugccgggagggaaagcgCa    | .....                    |                     |                    |                | 4   | 1 | seq |
| .....              | .ugccgggagggaaagcgGaa   | .....                    |                     |                    |                | 1   | 1 | seq |
| .....              | .ugccgggagggaaagcgaaU   | .....                    |                     |                    |                | 2   | 1 | seq |
| .....              | .ugccgggagggaaagcgGaaag | .....                    |                     |                    |                | 5   | 1 | seq |
| .....              | .ugccgggagggaaagcgaaUg  | .....                    |                     |                    |                | 1   | 1 | seq |
| .....              | .gccgggaAaggaagcgaa     | .....                    |                     |                    |                | 1   | 1 | seq |
| .....              | .gccgggagggaaagcgaa     | .....                    |                     |                    |                | 1   | 0 | seq |
| .....              | .gccgggagggaaagcgCa     | .....                    |                     |                    |                | 4   | 1 | seq |
| .....              | .gccgggagggaaagcgGaa    | .....                    |                     |                    |                | 5   | 1 | seq |
| .....              | .gccgggagggaaagcgGaaag  | .....                    |                     |                    |                | 1   | 1 | seq |
| .....              | .ccgggagggaaagcgGaa     | .....                    |                     |                    |                | 1   | 1 | seq |
| .....              | .ccgggagggaaagcgGaaag   | .....                    |                     |                    |                | 1   | 1 | seq |
| .....              | .cgggagggaaagcgGaaag    | .....                    |                     |                    |                | 1   | 1 | seq |
| .....              |                         |                          | .agaaauugggaGcaucug |                    |                | 1   | 1 | seq |
| .....              |                         |                          |                     | .ugaaggucucauggCga | .....          | 1   | 1 | seq |

Provisional ID : MA\_860068\_31379  
 Score total : 0.3  
 Score for star read(s) : -1.3  
 Score for read counts : 0  
 Score for mfe : 0  
 Score for randfold : 1.6  
 Score for cons. seed :  
 Total read count : 9778  
 Mature read count : 9778  
 Loop read count : 0  
 Star read count : 0

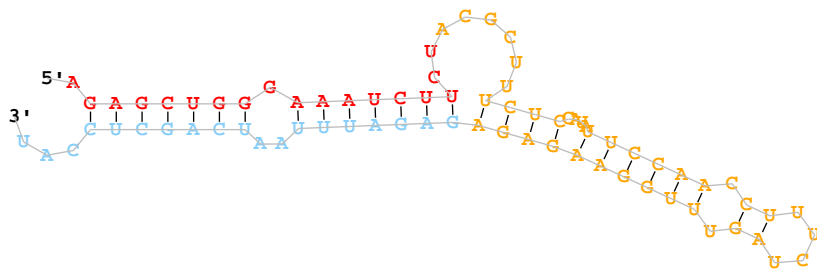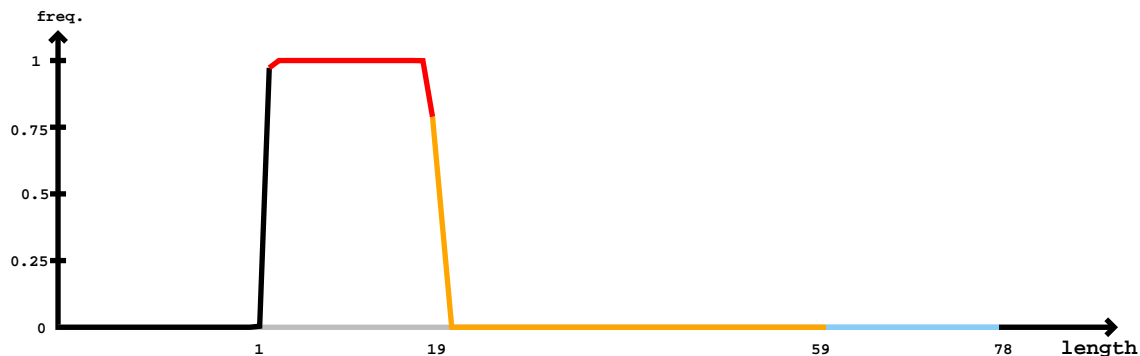

### Mature

### Star

| 5'                                                                                   |  | -3'   | exp |        |  |
|--------------------------------------------------------------------------------------|--|-------|-----|--------|--|
| ..(((((((.....)))))).(((((((.....(((((((.....(((((((.....))))))))))))))))))))))..... |  | reads | mm  | sample |  |
| .....aagGgcugggaaaaucuu.....                                                         |  | 4     | 1   | seq    |  |
| .....Gagagcugggaaaaucuu.....                                                         |  | 3     | 1   | seq    |  |
| .....aagGgcugggaaaaucuu.....                                                         |  | 8     | 1   | seq    |  |
| .....Gagagcugggaaaaucuu.....                                                         |  | 6     | 1   | seq    |  |
| .....aagGgcugggaaaaucuu.....                                                         |  | 12    | 1   | seq    |  |
| .....Gagagcugggaaaaucuu.....                                                         |  | 6     | 1   | seq    |  |
| .....agagcugggaaaaucuu.....                                                          |  | 10    | 0   | seq    |  |
| .....agGgcugggaaaaucuu.....                                                          |  | 2034  | 1   | seq    |  |
| .....agGgcugggaaaaucuu.....                                                          |  | 7202  | 1   | seq    |  |
| .....agagcugggaaaaucuu.....                                                          |  | 18    | 0   | seq    |  |
| .....agagcugggaaaaucuuC.....                                                         |  | 1     | 1   | seq    |  |
| .....agGgcugggaaaaucuu.....                                                          |  | 3     | 1   | seq    |  |
| .....agUgcugggaaaaucuu.....                                                          |  | 9     | 1   | seq    |  |
| .....agagcugggaaaaucuuC.....                                                         |  | 30    | 1   | seq    |  |
| .....agGgcugggaaaaucuu.....                                                          |  | 164   | 1   | seq    |  |
| .....gagcugggaaaaucuu.....                                                           |  | 10    | 0   | seq    |  |
| .....gGgcugggaaaaucuu.....                                                           |  | 245   | 1   | seq    |  |
| .....gUgcugggaaaaucuu.....                                                           |  | 1     | 1   | seq    |  |
| .....gagcugggaaaaucuuC.....                                                          |  | 1     | 1   | seq    |  |
| .....gGgcugggaaaaucuu.....                                                           |  | 8     | 1   | seq    |  |
| .....gagcugggaaaaucuuC.....                                                          |  | 1     | 1   | seq    |  |
| .....Ggcugggaaaaucuu.....                                                            |  | 2     | 1   | seq    |  |

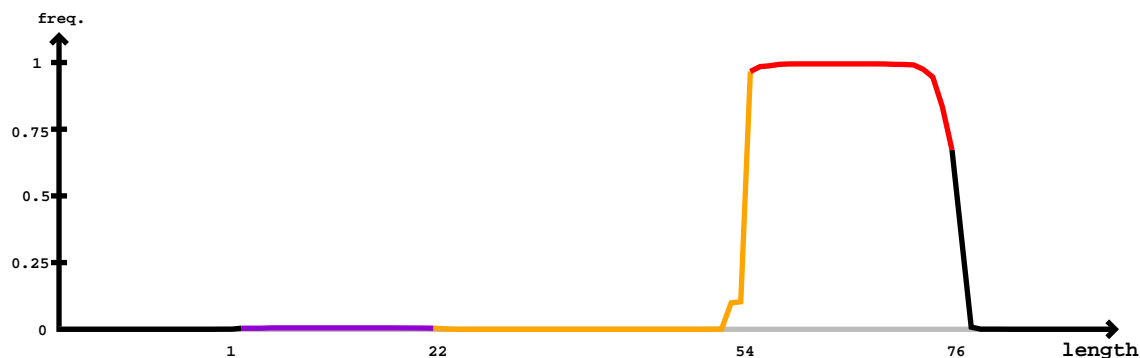

## Mature

[illegible]

## Star

## Mature

agaggagaaaggccuuaggcuugcgaggauugggaaaaacgcacacgguguuuccuacccgauuuauagucuuuccuacuccucccaagcccauggccuugccuucgcu

|                                    |      |   |     |
|------------------------------------|------|---|-----|
| .....cuuuccuacuccucccaagAcca.....  | 1    | 1 | seq |
| .....cuuuccuacuccucccaagccca.....  | 6    | 0 | seq |
| .....cuuuccuacuccucccaagcccau..... | 1    | 0 | seq |
| .....uuuccuacuccucccaa.....        | 5    | 0 | seq |
| .....uuuccuacuccucccaag.....       | 44   | 0 | seq |
| .....uuuccuacuccucccaaA.....       | 1    | 1 | seq |
| .....uuGccuacuccucccaagc.....      | 1    | 1 | seq |
| .....uuuccAacuccucccaagc.....      | 1    | 1 | seq |
| .....uuuccuacuccucccaagc.....      | 62   | 0 | seq |
| .....uuuccuacuccucccaaUc.....      | 2    | 1 | seq |
| .....uuuccuacuccucccaagU.....      | 7    | 1 | seq |
| .....uuuccuacuccucccaagG.....      | 1    | 1 | seq |
| .....uuuccuacuccucccaagcc.....     | 45   | 0 | seq |
| .....uuuccuacCccucccaagcc.....     | 1    | 1 | seq |
| .....uuuccuacuccucccaaUcc.....     | 1    | 1 | seq |
| .....uuuccuacuccuGccaagcc.....     | 1    | 1 | seq |
| .....uuuccuacuccucccaagcA.....     | 2    | 1 | seq |
| .....uuuccuacuccucccaagcU.....     | 12   | 1 | seq |
| .....uuuccuacuccucccaaUccc.....    | 1    | 1 | seq |
| .....Nuuccuacuccucccaagccc.....    | 1    | 1 | seq |
| .....uuuccuacuccucccUagccc.....    | 1    | 1 | seq |
| .....uCuccuacuccucccaagccc.....    | 1    | 1 | seq |
| .....uuuccuacuccCcccaagccc.....    | 1    | 1 | seq |
| .....uuuccuacuccucccGagccc.....    | 1    | 1 | seq |
| .....uuuccuacuccucccaagccG.....    | 4    | 1 | seq |
| .....uuuccuacAccucccaagccc.....    | 1    | 1 | seq |
| .....Guuccuacuccucccaagccc.....    | 1    | 1 | seq |
| .....Cuuccuacuccucccaagccc.....    | 3    | 1 | seq |
| .....uuuccuacuccucccaagccc.....    | 362  | 0 | seq |
| .....uuuccuacuccucccaagccA.....    | 23   | 1 | seq |
| .....uuuccCacuccucccaagccc.....    | 1    | 1 | seq |
| .....uuuccuacuccucccaGgccc.....    | 1    | 1 | seq |
| .....uuuccuacuccucUcaagccc.....    | 1    | 1 | seq |
| .....uuuccuacuccucccaagcUc.....    | 1    | 1 | seq |
| .....uuuccuacuccucccaagUcc.....    | 1    | 1 | seq |
| .....uuuccuacucGuucccaagccc.....   | 1    | 1 | seq |
| .....uuuccuacuccucccaagccU.....    | 99   | 1 | seq |
| .....uuuccuacuccucAcaagccc.....    | 1    | 1 | seq |
| .....uGuccuacuccucccaagccca.....   | 1    | 1 | seq |
| .....uuuccuacuUcucccaagccca.....   | 1    | 1 | seq |
| .....uuuccuacuccucUcaagccca.....   | 1    | 1 | seq |
| .....uuuccuacuccucccaGgccca.....   | 4    | 1 | seq |
| .....uuucUuacuccucccaagccca.....   | 1    | 1 | seq |
| .....uuuccuacuccucccGagccca.....   | 8    | 1 | seq |
| .....uuuUcuaucuccucccaagccca.....  | 3    | 1 | seq |
| .....uuuccuacuccucccaagcccU.....   | 34   | 1 | seq |
| .....uuuccuacCccucccaagccca.....   | 3    | 1 | seq |
| .....uuuccuacuccucccaagcccC.....   | 54   | 1 | seq |
| .....uuuccuacuccucccaaAccca.....   | 1    | 1 | seq |
| .....Guuccuacuccucccaagccca.....   | 6    | 1 | seq |
| .....uuuccuacuccucccaagUcca.....   | 1    | 1 | seq |
| .....uAuccuacuccucccaagccca.....   | 1    | 1 | seq |
| .....uuuccuacuccuccUaagccca.....   | 2    | 1 | seq |
| .....uuuccuacuccuccUagccca.....    | 2    | 1 | seq |
| .....uuuccuacuccucccaagccca.....   | 1902 | 0 | seq |
| .....uuuccuacuccucccaagcGca.....   | 1    | 1 | seq |
| .....uuuccuacuccucccaagcccG.....   | 80   | 1 | seq |
| .....uuuccuacuccucccaagcUca.....   | 1    | 1 | seq |
| .....uuuccuacuccuccAaagccca.....   | 2    | 1 | seq |
| .....uuuccuacuccucccaCgccca.....   | 1    | 1 | seq |
| .....uuuccuacucGuucccaagccca.....  | 1    | 1 | seq |
| .....uuuccuacGccucccaagccca.....   | 1    | 1 | seq |
| .....Nuuccuacuccucccaagccca.....   | 4    | 1 | seq |
| .....uuuccuacuccuUccaagccca.....   | 4    | 1 | seq |
| .....uuCccuacuccucccaagccca.....   | 3    | 1 | seq |
| .....uuuccuacuccucccaagcAca.....   | 1    | 1 | seq |
| .....uuuccuacuccucccaagccUa.....   | 5    | 1 | seq |
| .....uuuccuacuccucccaagccAa.....   | 1    | 1 | seq |
| .....Cuuccuacuccucccaagccca.....   | 5    | 1 | seq |
| .....uuuccuacucAucccaagccca.....   | 1    | 1 | seq |

## Star

## Mature

|                                                                                                                   |    |   |     |
|-------------------------------------------------------------------------------------------------------------------|----|---|-----|
| agaggagaaaggccuuaggcuugcgcgaggaugggaaaaacgcacuaacgguguuccuucacccgauuuauagucuuuccuacuccucccaagcccauggccuugccuucgcu |    |   |     |
| .....uuuccuacuccuccccCagccca.....                                                                                 | 3  | 1 | seq |
| .....uuuccCacuccucccaagccca.....                                                                                  | 3  | 1 | seq |
| .....uCuccuacuccucccaagccca.....                                                                                  | 3  | 1 | seq |
| .....uuuccuacuccCcccaagccca.....                                                                                  | 6  | 1 | seq |
| .....uuuccuGcuccucccaagccca.....                                                                                  | 1  | 1 | seq |
| .....uuuccuacuccucccaagcccaA.....                                                                                 | 2  | 1 | seq |
| .....uuuccuacuccucccaagcccCu.....                                                                                 | 3  | 1 | seq |
| .....uuuccuacuccucccaagcccaC.....                                                                                 | 3  | 1 | seq |
| .....uuuccuacuccucccaagcccau.....                                                                                 | 9  | 0 | seq |
| .....uuAccuacuccucccaagcccau.....                                                                                 | 1  | 1 | seq |
| .....uuuccuacuccucccaagcccaG.....                                                                                 | 1  | 1 | seq |
| .....uuuccuacuccucccaagcccauC.....                                                                                | 7  | 1 | seq |
| .....uuuccuacuccucccaagcccauU.....                                                                                | 19 | 1 | seq |
| .....uuccuacuccucccaag.....                                                                                       | 6  | 0 | seq |
| .....uuccuacuccucccaagc.....                                                                                      | 4  | 0 | seq |
| .....uuccuacuccucccaagcc.....                                                                                     | 5  | 0 | seq |
| .....uuccuacuccucccaagccU.....                                                                                    | 5  | 1 | seq |
| .....uuccuacuccucccaagccc.....                                                                                    | 8  | 0 | seq |
| .....uuccuacuccucccaagccA.....                                                                                    | 1  | 1 | seq |
| .....uuccuacuccucccaagcccC.....                                                                                   | 3  | 1 | seq |
| .....uuccuacuccucccaagccca.....                                                                                   | 27 | 0 | seq |
| .....uuccuacuccucccaagcccau.....                                                                                  | 1  | 0 | seq |
| .....uCCuacuccucccaagcccau.....                                                                                   | 1  | 1 | seq |
| .....uccuacuccucccaagU.....                                                                                       | 1  | 1 | seq |
| .....uccuacuccucccaagcc.....                                                                                      | 3  | 0 | seq |
| .....uccuacuccucccaagccc.....                                                                                     | 3  | 0 | seq |
| .....uccuacuccucccaagUcc.....                                                                                     | 1  | 1 | seq |
| .....uccuacuccucccaagccA.....                                                                                     | 1  | 1 | seq |
| .....uccuacuccucccaagccU.....                                                                                     | 1  | 1 | seq |
| .....uccuacuccucccaagcccauggcc.....                                                                               | 1  | 0 | seq |
| .....ccuacuccucccaagcc.....                                                                                       | 6  | 0 | seq |
| .....ccuacuccucccaagccc.....                                                                                      | 7  | 0 | seq |
| .....ccuacuccucccaagccU.....                                                                                      | 1  | 1 | seq |
| .....ccuacucAucccaagccc.....                                                                                      | 1  | 1 | seq |
| .....ccuacuccucccaagccca.....                                                                                     | 3  | 0 | seq |
| .....cuacuccucccaagccc.....                                                                                       | 2  | 0 | seq |
| .....cuacuccucccaagccU.....                                                                                       | 1  | 1 | seq |
| .....cuacuccucccaagccca.....                                                                                      | 2  | 0 | seq |
| .....uacuccucccaagccca.....                                                                                       | 1  | 0 | seq |

Provisional ID : MA\_8750034\_30653  
 Score total : 1.3  
 Score for star read(s) : -1.3  
 Score for read counts : 0  
 Score for mfe : 1  
 Score for randfold : 1.6  
 Score for cons. seed :  
 Total read count : 116  
 Mature read count : 115  
 Loop read count : 0  
 Star read count : 1

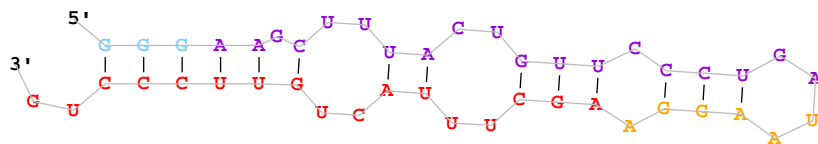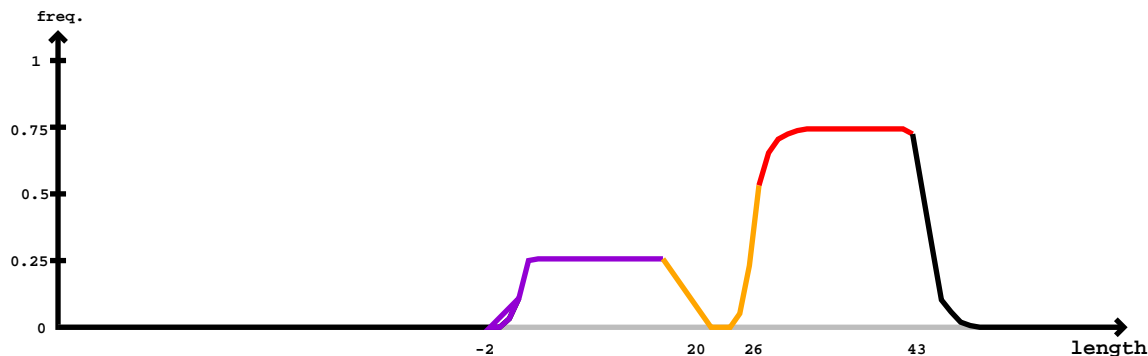

|                                                                                                                 |       | Star |        | Mature |  |  |  |  |  |
|-----------------------------------------------------------------------------------------------------------------|-------|------|--------|--------|--|--|--|--|--|
| 5'                                                                                                              |       |      |        |        |  |  |  |  |  |
| aaaccagggcgagcuuuccaguaaguuguccaucuaaguccuaggggaagcuuuacuguuuccugauaagggaagcuuuacuguuuccuggggguuauucacaacaacuua | -3'   | obs  |        |        |  |  |  |  |  |
| aaaccagggcgagcuuuccaguaaguuguccaucuaaguccuaggggaagcuuuacuguuuccugauaagggaagcuuuacuguuuccuggggguuauucacaacaacuua | exp   |      |        |        |  |  |  |  |  |
| .....((((((((.....)))))))).((((((((((((((((.....)))))))).)))))).....                                            | reads | mm   | sample |        |  |  |  |  |  |
| .....gaagcuuuacuguuuccu.....                                                                                    | 2     | 0    | seq    |        |  |  |  |  |  |
| .....gaagcuuuacuguuuccug.....                                                                                   | 6     | 0    | seq    |        |  |  |  |  |  |
| .....gGagcuuuacuguuuccug.....                                                                                   | 2     | 1    | seq    |        |  |  |  |  |  |
| .....aagcuuuacuguuuccC.....                                                                                     | 2     | 1    | seq    |        |  |  |  |  |  |
| .....aagcuuuacuguuuccu.....                                                                                     | 2     | 0    | seq    |        |  |  |  |  |  |
| .....aagcuuuacuguuuccuU.....                                                                                    | 2     | 1    | seq    |        |  |  |  |  |  |
| .....aagcuuuacuguuuccug.....                                                                                    | 14    | 0    | seq    |        |  |  |  |  |  |
| .....aagcuuuacuguuAccug.....                                                                                    | 2     | 1    | seq    |        |  |  |  |  |  |
| .....aagcuuuacuguuuccuga.....                                                                                   | 1     | 0    | seq    |        |  |  |  |  |  |
| .....agcuuuacuguuuccug.....                                                                                     | 40    | 0    | seq    |        |  |  |  |  |  |
| .....agcuuuacuguuuccCg.....                                                                                     | 2     | 1    | seq    |        |  |  |  |  |  |
| .....agcuuuacuguuuccugU.....                                                                                    | 2     | 1    | seq    |        |  |  |  |  |  |
| .....gcuuuacuguuuccugaG.....                                                                                    | 1     | 1    | seq    |        |  |  |  |  |  |
| .....gaagcuuuacuguuuccu.....                                                                                    | 2     | 0    | seq    |        |  |  |  |  |  |
| .....gaagcuuuacuguuuccug.....                                                                                   | 6     | 0    | seq    |        |  |  |  |  |  |
| .....gGagcuuuacuguuuccug.....                                                                                   | 2     | 1    | seq    |        |  |  |  |  |  |
| .....gaagcuuuacuguuuccugg.....                                                                                  | 3     | 0    | seq    |        |  |  |  |  |  |
| .....aagcuuuacuguuuccC.....                                                                                     | 2     | 1    | seq    |        |  |  |  |  |  |
| .....aagcuuuacuguuuccu.....                                                                                     | 2     | 0    | seq    |        |  |  |  |  |  |
| .....aagcuuuacuguuuccug.....                                                                                    | 14    | 0    | seq    |        |  |  |  |  |  |
| .....aagcuuuacuguuAccug.....                                                                                    | 2     | 1    | seq    |        |  |  |  |  |  |
| .....aagcuuuacuguuuccuU.....                                                                                    | 2     | 1    | seq    |        |  |  |  |  |  |
| .....aagcuuuacuguuuccugg.....                                                                                   | 9     | 0    | seq    |        |  |  |  |  |  |
| .....aagcuuuacuguuuccuAgg.....                                                                                  | 1     | 1    | seq    |        |  |  |  |  |  |
| .....aagcuuuacuguuuccuggg.....                                                                                  | 3     | 0    | seq    |        |  |  |  |  |  |
| .....aagcuuuacuguuuccugggU.....                                                                                 | 1     | 1    | seq    |        |  |  |  |  |  |
| .....aagcuuuacuguuuccugggg.....                                                                                 | 1     | 0    | seq    |        |  |  |  |  |  |
| .....aagcuuuacuguuuccugggAg.....                                                                                | 1     | 1    | seq    |        |  |  |  |  |  |
| .....aagcuuuacuguuuccugggg.....                                                                                 | 1     | 0    | seq    |        |  |  |  |  |  |
| .....agcuuuacuguuuccug.....                                                                                     | 40    | 0    | seq    |        |  |  |  |  |  |
| .....agcuuuacuguuuccCg.....                                                                                     | 2     | 1    | seq    |        |  |  |  |  |  |
| .....agcuuuacuguuuccugU.....                                                                                    | 2     | 1    | seq    |        |  |  |  |  |  |
| .....agcuuuacuguuuccugg.....                                                                                    | 10    | 0    | seq    |        |  |  |  |  |  |

## Star

## Mature

aaaccagggcgagcuuuccaguaaguugccaucuaaguccuaggggaagcuuuacuguucccugauaagggaagcuuuacuguucccugggggguuuauucacaacaacuua

|                                 |    |   |     |
|---------------------------------|----|---|-----|
| .....agcuuuacuguucccuggA.....   | 2  | 1 | seq |
| .....agcuuuacuguucccuggg.....   | 10 | 0 | seq |
| .....agcuuuacuguucccugCg.....   | 1  | 1 | seq |
| .....agcuuuacuguucccugggC.....  | 1  | 1 | seq |
| .....agcuuuacuguucccugggg.....  | 1  | 0 | seq |
| .....gcuuuacuguucccugg.....     | 8  | 0 | seq |
| .....gcuuuacuguucccuggAg.....   | 1  | 1 | seq |
| .....gcuuuacuguucccuggA.....    | 1  | 1 | seq |
| .....gcuuuacuguucccuggg.....    | 6  | 0 | seq |
| .....Ucuuuacuguucccuggg.....    | 1  | 1 | seq |
| .....gcuuuacuguucccugggAg.....  | 1  | 1 | seq |
| .....gcuuuacuguucccuggggUu..... | 1  | 1 | seq |
| .....cuuuacuguucccuggg.....     | 4  | 0 | seq |
| .....cuuuacuguucccugggA.....    | 2  | 1 | seq |
| .....cuuuacuguucccugggg.....    | 1  | 0 | seq |
| .....cuuuacuguucccuggggU.....   | 1  | 1 | seq |
| .....uuuacuguucccugggU.....     | 1  | 1 | seq |
| .....uuuacuguCcccugggg.....     | 1  | 1 | seq |
| .....uuuacuguucccuggggUu.....   | 1  | 1 | seq |
| .....uuacuguucccuggggU.....     | 1  | 1 | seq |
| .....uuacuguucccuggggAg.....    | 1  | 1 | seq |
| .....uacuguucccuggggAguu.....   | 1  | 1 | seq |

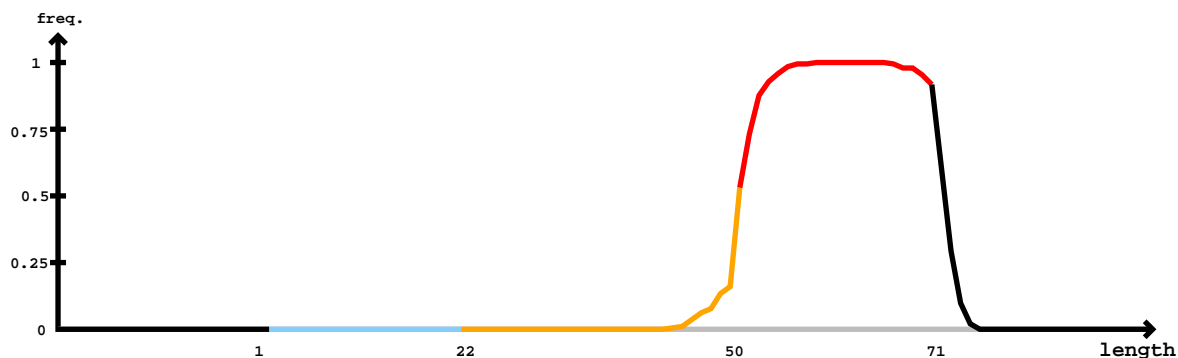

## Mature

| 5'                                                                                                     | uuggauuuaucaagagucuaagaucaaaauuuugcaagugaaaaccuaaaaaauuuaaagguuuacccuacaagaaauuggaaccucucuaacucuaauaaaucccaaa | -3' | exp    |  |
|--------------------------------------------------------------------------------------------------------|---------------------------------------------------------------------------------------------------------------|-----|--------|--|
| ..(((((((.-((((((.-((((((.(((((((...(((.(((((((.....)))))).)).))...)))))).))))..)))).)))))).)))))).... | reads                                                                                                         | mm  | sample |  |
| .....guuuacaccuUaagaaauuggau.....                                                                      | 1                                                                                                             | 1   | seq    |  |
| .....uuuacaccucaaagaaGuuggauc.....                                                                     | 1                                                                                                             | 1   | seq    |  |
| .....uuacaccucaaagaaauuggaacc.....                                                                     | 1                                                                                                             | 0   | seq    |  |
| .....uuacCccucaaagaaauuggaucc.....                                                                     | 1                                                                                                             | 1   | seq    |  |
| .....uuacaccucaaagaaauuggauAccucu.....                                                                 | 1                                                                                                             | 1   | seq    |  |
| .....Auacaccucaaagaaauuggaaccucuc.....                                                                 | 1                                                                                                             | 1   | seq    |  |
| .....uuacaccucaaagaaauuggaaccucucG.....                                                                | 1                                                                                                             | 1   | seq    |  |
| .....uacaccucaaagaaauugCaucccu.....                                                                    | 1                                                                                                             | 1   | seq    |  |
| .....uacaccucaaagaaauuggaaccu.....                                                                     | 2                                                                                                             | 0   | seq    |  |
| .....uacacGucaagaaauuggaaccu.....                                                                      | 1                                                                                                             | 1   | seq    |  |
| .....uGcaccucaaagaaauuggaaccucuc.....                                                                  | 1                                                                                                             | 1   | seq    |  |
| .....acaccucaaagaaUuuggauc.....                                                                        | 1                                                                                                             | 1   | seq    |  |
| .....acaccucaaagaaauCgauccuc.....                                                                      | 1                                                                                                             | 1   | seq    |  |
| .....acaccucaaagaaauuggaucUcucu.....                                                                   | 1                                                                                                             | 1   | seq    |  |
| .....caccucaaagaaauuggaucUcucu.....                                                                    | 1                                                                                                             | 1   | seq    |  |
| .....caccucaaagaaauuggauAccucu.....                                                                    | 1                                                                                                             | 1   | seq    |  |
| .....caccucaaagaaauuggaucGcucu.....                                                                    | 1                                                                                                             | 1   | seq    |  |
| .....cUccucaaagaaauuggaaccucuc.....                                                                    | 1                                                                                                             | 1   | seq    |  |
| .....caccucaaagaaauuggaaccucuc.....                                                                    | 5                                                                                                             | 0   | seq    |  |
| .....caccucaGgaaauuggaaccucuc.....                                                                     | 1                                                                                                             | 1   | seq    |  |
| .....cacAucaagaaauuggaaccucuc.....                                                                     | 1                                                                                                             | 1   | seq    |  |
| .....accucaaagaaauuggaaccucucU.....                                                                    | 1                                                                                                             | 1   | seq    |  |
| .....accucaaagaaauuggaaccucucG.....                                                                    | 1                                                                                                             | 1   | seq    |  |
| .....accucaaagaaauuggaaccucuc.....                                                                     | 3                                                                                                             | 0   | seq    |  |
| .....ccucaagaaCuuggauc.....                                                                            | 1                                                                                                             | 1   | seq    |  |
| .....ccucaagaaauuggaacc.....                                                                           | 2                                                                                                             | 0   | seq    |  |
| .....ccucaagaaauuggaucUcu.....                                                                         | 2                                                                                                             | 1   | seq    |  |
| .....ccucaagaaauuggaaccu.....                                                                          | 1                                                                                                             | 0   | seq    |  |
| .....ccucaagaaauuggaucUcuc.....                                                                        | 34                                                                                                            | 1   | seq    |  |
| .....cGucaagaaauuggaaccuc.....                                                                         | 1                                                                                                             | 1   | seq    |  |
| .....ccucaagaaauuggaaccuc.....                                                                         | 2                                                                                                             | 0   | seq    |  |
| .....ccucaagaaauuggaaccucuc.....                                                                       | 13                                                                                                            | 0   | seq    |  |
| .....ccucaagaaauuggaaccucG.....                                                                        | 1                                                                                                             | 1   | seq    |  |
| .....ccucaagaaauuggaaccucC.....                                                                        | 4                                                                                                             | 1   | seq    |  |



## Star

## Mature

|                      |                       |                             |                     |                            |
|----------------------|-----------------------|-----------------------------|---------------------|----------------------------|
| uuggauuuaucaagagucua | gagaucaaaauuuugcaagug | aaaaccuaaaaaauuuaaagguuacac | ccucaagaaaauuggauc  | ccucucuaucucuuaauaaaucccaa |
| .....                | .....                 | .....                       | ccucaagGaaauuggauc  | ccucuc.....                |
| .....                | .....                 | .....                       | ccucaagaaaauuggaucU | ccucuc.....                |
| .....                | .....                 | .....                       | ccucaagaaGuuggauc   | ccucuc.....                |
| .....                | .....                 | .....                       | ccucaagaaaauuggauc  | ccucucU.....               |
| .....                | .....                 | .....                       | ccucaagaaaauuggauc  | ccucucUu.....              |
| .....                | .....                 | .....                       | ccucaagaaaauuggauc  | ccucucG.....               |
| .....                | .....                 | .....                       | ccucaagaaaauuggauc  | ccucucGa.....              |
| .....                | .....                 | .....                       | cucaagaaaauuggauc   | ccucU.....                 |
| .....                | .....                 | .....                       | cucaagaaaauuggauc   | ccuc.....                  |
| .....                | .....                 | .....                       | cucaagaaaauuggaucU  | ccucuc.....                |
| .....                | .....                 | .....                       | cucaagaaaauuggauc   | ccucC.....                 |
| .....                | .....                 | .....                       | cucaagaaaauuggauc   | ccucuc.....                |
| .....                | .....                 | .....                       | cucaagaaaauuggauc   | ccucuc.....                |
| .....                | .....                 | .....                       | cucaagaaaauuggauc   | ccucucG.....               |
| .....                | .....                 | .....                       | cucaagaaaauuggauc   | ccucucG.....               |
| .....                | .....                 | .....                       | cucaagaaaauuggauc   | ccucucU.....               |
| .....                | .....                 | .....                       | ucaagaaaCuggauc     | cc.....                    |
| .....                | .....                 | .....                       | ucaagGaaauuggauc    | ccucuc.....                |
| .....                | .....                 | .....                       | ucaagaaaauuggauc    | ccucuc.....                |
| .....                | .....                 | .....                       | ucaagaaaauuggauA    | ccucuc.....                |
| .....                | .....                 | .....                       | ucaagaaaauuggauc    | Gucuc.....                 |
| .....                | .....                 | .....                       | ucaagaaaauuggauc    | ccucC.....                 |
| .....                | .....                 | .....                       | ucUagaaaauuggauc    | ccucuc.....                |
| .....                | .....                 | .....                       | ucaagaaaauuggauc    | ccucucA.....               |
| .....                | .....                 | .....                       | ucaagaaaauuggauc    | Ucucuc.....                |
| .....                | .....                 | .....                       | ucaagaaaauuggau     | Uccucuc.....               |
| .....                | .....                 | .....                       | ucaagaaaauuggau     | Accucuc.....               |
| .....                | .....                 | .....                       | ucaagaaaauuggauc    | ccucuc.....                |
| .....                | .....                 | .....                       | caagaaaauuggauc     | ccucuc.....                |
| .....                | .....                 | .....                       | caagaaaauuggauc     | ccucA.....                 |
| .....                | .....                 | .....                       | caagaaaauugU        | auccucuc.....              |
| .....                | .....                 | .....                       | caagaaaauuggauc     | ccucucG.....               |
| .....                | .....                 | .....                       | caagaaaauU          | gauccucuc.....             |
| .....                | .....                 | .....                       | aagaaaauuggauc      | ccucuc.....                |
| .....                | .....                 | .....                       | aagaaaauuggauc      | ccucuc.....                |
| .....                | .....                 | .....                       | aagaaaauuggauc      | ccucucG.....               |
| .....                | .....                 | .....                       | agaaaauuggauc       | ccucuc.....                |
| .....                | .....                 | .....                       | agaaaauuggauc       | ccucC.....                 |
| .....                | .....                 | .....                       | agaaaauuggauc       | ccucG.....                 |
| .....                | .....                 | .....                       | aUaaaauuggauc       | ccucucuc.....              |
| .....                | .....                 | .....                       | gaaaauuggauc        | ccucuc.....                |
| .....                | .....                 | .....                       | aaauggauc           | ccucucGa.....              |

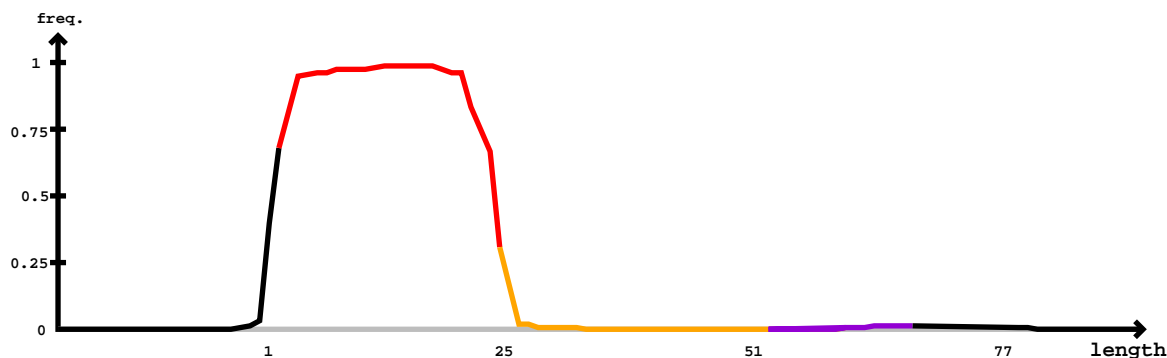

Star

## Mature

## Star

|                                                                                                                            |    |   |     |
|----------------------------------------------------------------------------------------------------------------------------|----|---|-----|
| uagggaauuuauaagagaguagagaggggauccaaauuucugagguguaaaaccuuuaaaauuuuuuuuaggguuuuccacuugcaaaaauuuugaucucugagacucucugauaaauccaa |    |   |     |
| .....agaggggauccaaauuucugaggGg.....                                                                                        | 2  | 1 | seq |
| .....gaggggauccaaauuucugag.....                                                                                            | 2  | 0 | seq |
| .....gaggggaucGaaauuucugagg.....                                                                                           | 1  | 1 | seq |
| .....gaggggaucUaaauuucugagg.....                                                                                           | 1  | 1 | seq |
| .....gaggggauccaaauuucugagg.....                                                                                           | 2  | 0 | seq |
| .....gaggggauccaaauuucugagC.....                                                                                           | 1  | 1 | seq |
| .....gaggggaucAaaauuucugagg.....                                                                                           | 2  | 1 | seq |
| .....gaggggaucGaaauuucugaggu.....                                                                                          | 1  | 1 | seq |
| .....gaggggauccaaauuucugaggug.....                                                                                         | 2  | 0 | seq |
| .....gaUgggauccaaauuucugaggug.....                                                                                         | 1  | 1 | seq |
| .....gaggggauccaaauuucugaCgugu.....                                                                                        | 1  | 1 | seq |
| .....gaCgggauccaaauuucugaggug.....                                                                                         | 1  | 1 | seq |
| .....Aaggggauccaaauuucugaggug.....                                                                                         | 1  | 1 | seq |
| .....gaggggaucGaaauuucugaggug.....                                                                                         | 1  | 1 | seq |
| .....gaggggauccaaauuPuuaggug.....                                                                                          | 1  | 1 | seq |
| .....gaggggauccaaauuAuuaggug.....                                                                                          | 1  | 1 | seq |
| .....gaggggauccaaauuucugaggug.....                                                                                         | 17 | 0 | seq |
| .....Uaggggauccaaauuucugaggug.....                                                                                         | 2  | 1 | seq |
| .....gaggggaUcaaauuucugaggug.....                                                                                          | 2  | 1 | seq |
| .....gaggggauccaaauuucugaggugC.....                                                                                        | 2  | 1 | seq |
| .....gaggggauccaaauuucugaggugua.....                                                                                       | 1  | 0 | seq |
| .....gaggggauccaaauuucugagguguaaa.....                                                                                     | 1  | 0 | seq |
| .....aggggauccaaauuucugagU.....                                                                                            | 1  | 1 | seq |
| .....aggggauccaaauuucugaggG.....                                                                                           | 1  | 1 | seq |
| .....aggggaucUaaauuucugaggu.....                                                                                           | 3  | 1 | seq |
| .....agAgauccaaauuucugaggu.....                                                                                            | 1  | 1 | seq |
| .....aggggaucGaaauuucugaggu.....                                                                                           | 1  | 1 | seq |
| .....aggggauccaaauuucugaAgu.....                                                                                           | 1  | 1 | seq |
| .....aggggaucUaaauuucugaggug.....                                                                                          | 1  | 1 | seq |
| .....aUgggauccaaauuucugaggug.....                                                                                          | 1  | 1 | seq |
| .....aggggaUcaaauuucugaggug.....                                                                                           | 1  | 1 | seq |
| .....aggggauccaaauuucugagAgu.....                                                                                          | 1  | 1 | seq |
| .....aggggauccaaauuucugaggug.....                                                                                          | 5  | 0 | seq |
| .....Ugggauccaaauuucugaggug.....                                                                                           | 1  | 1 | seq |
| .....aggggaUcaaauuucugaggugua.....                                                                                         | 1  | 1 | seq |
| .....aggggauccaaauuucugaggugua.....                                                                                        | 1  | 0 | seq |
| .....aggggauccaaauuucugaAguagua.....                                                                                       | 1  | 1 | seq |
| .....gggauccaaauuucugagg.....                                                                                              | 1  | 0 | seq |
| .....gggaUAcaaauuucugaggu.....                                                                                             | 2  | 1 | seq |
| .....gggauccaaauuucugaggu.....                                                                                             | 1  | 0 | seq |
| .....Aggauccaaauuucugaggug.....                                                                                            | 1  | 1 | seq |
| .....gggauccaaauuucugaggug.....                                                                                            | 7  | 0 | seq |
| .....gAgauccaaauuucugaggug.....                                                                                            | 2  | 1 | seq |
| .....gggauccaaauuPuuaggug.....                                                                                             | 1  | 1 | seq |
| .....gggaucAaaauuucugaggug.....                                                                                            | 2  | 1 | seq |
| .....gggauccaaauuucugagguU.....                                                                                            | 1  | 1 | seq |
| .....gggaUGcaaauuucugaggug.....                                                                                            | 1  | 1 | seq |
| .....gggaUcaaauuucugaggug.....                                                                                             | 1  | 1 | seq |
| .....gggauccaaauuucugaAguagua.....                                                                                         | 1  | 1 | seq |
| .....ggauccaaauuPuuaggug.....                                                                                              | 1  | 1 | seq |
| .....gauccaaauucCgagg.....                                                                                                 | 1  | 1 | seq |
| .....uccaaauuucugaggug.....                                                                                                | 1  | 0 | seq |
| .....ucUaaauuucugaggugua.....                                                                                              | 1  | 1 | seq |
| .....auuucugagguguaaa.....                                                                                                 | 1  | 0 | seq |
| .....uuucugagguguaaacUuu.....                                                                                              | 1  | 1 | seq |
| .....aaauugaucucCagacu.....                                                                                                | 1  | 1 | seq |
| .....uugaucucUGacucu.....                                                                                                  | 1  | 1 | seq |

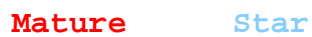[illegible]

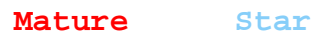

3'  5'

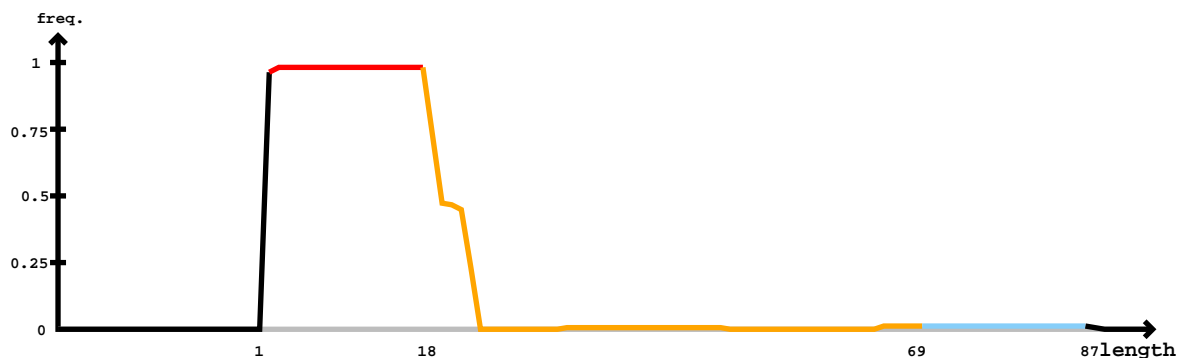

Star

[illegible]

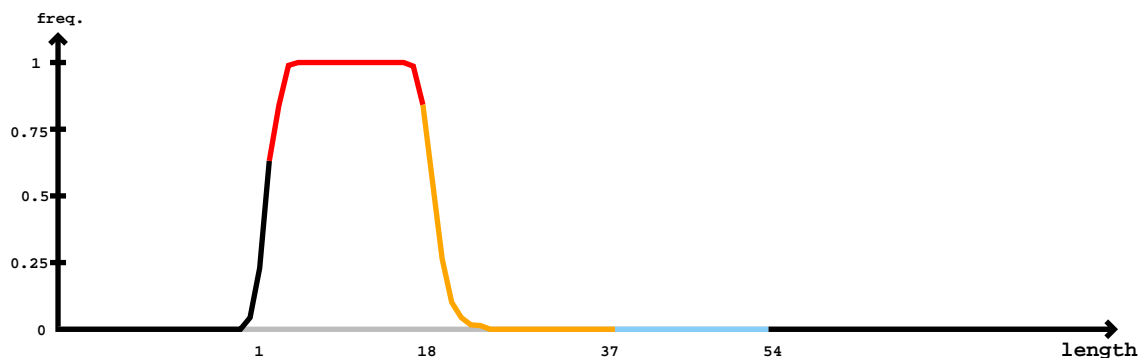

Star

[illegible]

Mature Star

Star

[illegible]



Provisional ID : MA\_89341\_19825  
Score total : 1.6  
Score for star read(s) : -1.3  
Score for read counts : 0  
Score for mfe : 1.3  
Score for randfold : 1.6  
Score for cons. seed :  
Total read count : 7248  
Mature read count : 6989  
Loop read count : 0  
Star read count : 259

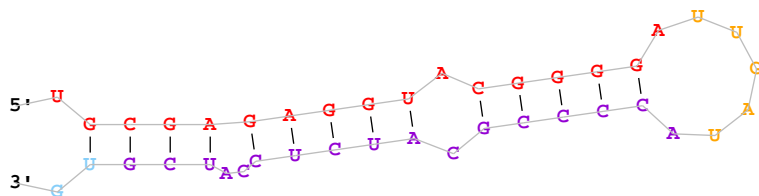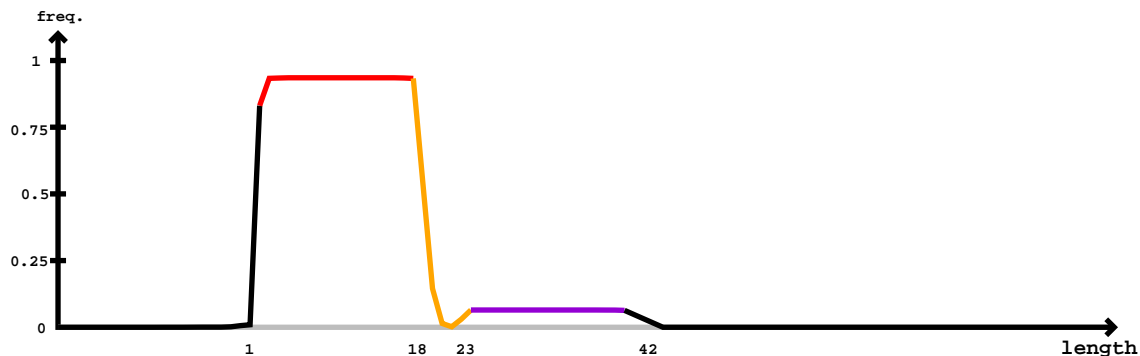

## Mature Star

| 5'                 |                                                                                              | 3'    | obs |        |  |
|--------------------|----------------------------------------------------------------------------------------------|-------|-----|--------|--|
|                    |                                                                                              |       | exp |        |  |
|                    |                                                                                              | reads | mm  | sample |  |
| guagagcgucgcuuagca | ugcgagagguacggggaauugauaccccgcaucuccaucgugcucuuguuuuucaaaguuuucuuuuuuuugacuuagcucaaacauucg   | 1     | 1   | seq    |  |
| guagagcgucgcuuagca | ugcgagagguacggggaauugauaccccgcaucuccaucgugcucuuguuuuucaaaguuuucuuuuuuuugacuuagcucaaacauucg   | 1     | 1   | seq    |  |
| ...                | (((((...(((...(((...(((...(((...))))))...))))))...))))...(((...(((...))))))...))))...))))... | 1     | 1   | seq    |  |
| ...                | ucgcuuGgcaugcgagagguacgggga...                                                               | 1     | 1   | seq    |  |
| ...                | cuuGgcaugcgagagguacggggaau...                                                                | 1     | 1   | seq    |  |
| ...                | uuGgcaugcgagagguacgggga...                                                                   | 1     | 1   | seq    |  |
| ...                | uuGgcaugcgagagguacgggga...                                                                   | 1     | 1   | seq    |  |
| ...                | gcaugcgagagguacgggga...                                                                      | 1     | 0   | seq    |  |
| ...                | gcUugcgagagguacgggga...                                                                      | 1     | 1   | seq    |  |
| ...                | gcGugcgagagguacgggga...                                                                      | 1     | 1   | seq    |  |
| ...                | gcUugcgagagguacgggga...                                                                      | 2     | 1   | seq    |  |
| ...                | gcUugcgagagguacggggaau...                                                                    | 1     | 1   | seq    |  |
| ...                | gcaugcgagagguacggggaau...                                                                    | 2     | 0   | seq    |  |
| ...                | gcUugcgagagguacggggaau...                                                                    | 1     | 1   | seq    |  |
| ...                | caugcgagagguacgggga...                                                                       | 1     | 0   | seq    |  |
| ...                | cUugcgagagguacgggga...                                                                       | 3     | 1   | seq    |  |
| ...                | cUugcgagagguacgggga...                                                                       | 1     | 1   | seq    |  |
| ...                | caugcgagagguacgggga...                                                                       | 3     | 0   | seq    |  |
| ...                | cUugcgagagguacgggga...                                                                       | 2     | 1   | seq    |  |
| ...                | caugcgagagguacgggga...                                                                       | 1     | 1   | seq    |  |
| ...                | cUugcgagagguacgggga...                                                                       | 2     | 1   | seq    |  |
| ...                | caugcgagagguacgggga...                                                                       | 5     | 0   | seq    |  |
| ...                | cUugcgagagguacgggga...                                                                       | 5     | 1   | seq    |  |
| ...                | cGugcgagagguacgggga...                                                                       | 4     | 1   | seq    |  |
| ...                | cGugcgagagguacggggaau...                                                                     | 1     | 1   | seq    |  |
| ...                | caugcgagagguacggggaau...                                                                     | 1     | 0   | seq    |  |
| ...                | cGugcgagagguacggggaau...                                                                     | 1     | 1   | seq    |  |
| ...                | cUugcgagagguacggggaau...                                                                     | 1     | 1   | seq    |  |
| ...                | caugcgagagguacggggaauGg...                                                                   | 1     | 1   | seq    |  |
| ...                | cUugcgagagguacggggaauug...                                                                   | 1     | 1   | seq    |  |
| ...                | augcgagagguacgggga...                                                                        | 4     | 0   | seq    |  |
| ...                | augcgagagguacgggga...                                                                        | 4     | 0   | seq    |  |
| ...                | Nugcgagagguacgggga...                                                                        | 1     | 1   | seq    |  |
| ...                | Cugcgagagguacgggga...                                                                        | 2     | 1   | seq    |  |
| ...                | Cugcgagagguacggggaau...                                                                      | 1     | 1   | seq    |  |
| ...                | augcgagagguacggggaau...                                                                      | 1     | 0   | seq    |  |

Mature Star

|                                                                                                                 |      |   |     |
|-----------------------------------------------------------------------------------------------------------------|------|---|-----|
| guagagcgucgcucgcuuagcaugcgagagguacgggggaauugauaccccgcaucuccaucgugcunuuuuuucaaguuuuuacuuuuuuugacuuagcucuaacauucg |      |   |     |
| .Cu g c g a g a g g u a c g g g g a u u .                                                                       | 1    | 1 | seq |
| .U g c g a g a g g u a c g g g g a u u .                                                                        | 5    | 1 | seq |
| .a u g c g a g a g U u a c g g g g a u u .                                                                      | 1    | 1 | seq |
| .G u g c g a g a g g u a c g g g g a u u .                                                                      | 2    | 1 | seq |
| .U g c g a g a g g u a c g g g g a u u g .                                                                      | 2    | 1 | seq |
| .u g c g C g a g g u a c g g g g a .                                                                            | 1    | 1 | seq |
| .u g c g a g a g g u G c g g g g a .                                                                            | 7    | 1 | seq |
| .G g c g a g a g g u a c g g g g a .                                                                            | 6    | 1 | seq |
| .u g c g a g C g g u a c g g g g a .                                                                            | 2    | 1 | seq |
| .u g c g a g a g A u a c g g g g a .                                                                            | 7    | 1 | seq |
| .A g c g a g a g g u a c g g g g a .                                                                            | 9    | 1 | seq |
| .u g c g a g a g g G a c g g g g a .                                                                            | 6    | 1 | seq |
| .u g c g a g a g g u a c g g g g C .                                                                            | 352  | 1 | seq |
| .u g c g a g a g C u a c g g g g a .                                                                            | 1    | 1 | seq |
| .u g c g a g a C g u a c g g g g a .                                                                            | 1    | 1 | seq |
| .u g c U a g a g g u a c g g g g a .                                                                            | 1    | 1 | seq |
| .u U c g a g a g g u a c g g g g a .                                                                            | 2    | 1 | seq |
| .u g c g a g a g g u a c g g g g C a .                                                                          | 18   | 1 | seq |
| .C g c g a g a g g u a c g g g g a .                                                                            | 9    | 1 | seq |
| .u g c g a g a g g u a G g g g g a .                                                                            | 1    | 1 | seq |
| .N g c g a g a g g u a c g g g g a .                                                                            | 7    | 1 | seq |
| .u g c g a g a g g u a c U g g g a .                                                                            | 4    | 1 | seq |
| .u g c g a g a g g u a c g g C g a .                                                                            | 4    | 1 | seq |
| .u g c G g a g g u a c g g g g a .                                                                              | 18   | 1 | seq |
| .u A c g a g a g g u a c g g g g a .                                                                            | 3    | 1 | seq |
| .u g c g a g a g g u U c g g g g a .                                                                            | 4    | 1 | seq |
| .u g c g a g a g g u a c g g g g a .                                                                            | 4420 | 0 | seq |
| .u g c g a g a U g u a c g g g g a .                                                                            | 1    | 1 | seq |
| .u g c g a A a g g u a c g g g g a .                                                                            | 2    | 1 | seq |
| .u g c g a g a g U u a c g g g g a .                                                                            | 3    | 1 | seq |
| .u g c g a g U g g u a c g g g g a .                                                                            | 3    | 1 | seq |
| .u N c g a g a g g u a c g g g g a .                                                                            | 1    | 1 | seq |
| .u g c g a g a g g u a c g C g g a .                                                                            | 6    | 1 | seq |
| .u g c g a g a g g u a c g g g g a G .                                                                          | 9    | 1 | seq |
| .u g c g a g a g g u G c g g g g a u .                                                                          | 1    | 1 | seq |
| .u U c g a g a g g u a c g g g g a u .                                                                          | 1    | 1 | seq |
| .u g c g a g a g g u a c g g g g C a u .                                                                        | 1    | 1 | seq |
| .u g c g a g a g g u a c g g g g a C .                                                                          | 66   | 1 | seq |
| .u g c g a g a g g u a c g g g g a A .                                                                          | 5    | 1 | seq |
| .u g c g a g a g g u a c g g g g a u .                                                                          | 455  | 0 | seq |
| .u g c g G g a g g u a c g g g g a u .                                                                          | 2    | 1 | seq |
| .A g c g a g a g g u a c g g g g a u .                                                                          | 1    | 1 | seq |
| .u g c g a g a g g u a c g g g g C u .                                                                          | 25   | 1 | seq |
| .u g c g a g a U g u a c g g g g a u .                                                                          | 1    | 1 | seq |
| .u g c g a g a g g u a c g U g g a u .                                                                          | 1    | 1 | seq |
| .u g c g a g a g g u a c g g g g a G u .                                                                        | 1    | 1 | seq |
| .A g c g a g a g g u a c g g g g a u u .                                                                        | 1    | 1 | seq |
| .u g c g G g a g g u a c g g g g a u u .                                                                        | 4    | 1 | seq |
| .u g c g a g a g g u a U g g g g a u u .                                                                        | 10   | 1 | seq |
| .u g c g a g a g g u a c g g g g C u u .                                                                        | 2    | 1 | seq |
| .u g c A a g a g g u a c g g g g a u u .                                                                        | 1    | 1 | seq |
| .u g c g a g a g g u G c g g g g a u u .                                                                        | 1    | 1 | seq |
| .u g c g a g a g g u a c g g g g a C u .                                                                        | 9    | 1 | seq |
| .u g c g a g a g g u a c g g g g a u A .                                                                        | 104  | 1 | seq |
| .u g c g a g C g g u a c g g g g a u u .                                                                        | 2    | 1 | seq |
| .u g c g a g U g g u a c g g g g a u u .                                                                        | 1    | 1 | seq |
| .u g c g a g a g g u a c g U g g a u u .                                                                        | 2    | 1 | seq |
| .u g c g a g a g g u a c g g g C a u u .                                                                        | 1    | 1 | seq |
| .u g c g a g a g g u a c g g g g a u G .                                                                        | 8    | 1 | seq |
| .u g c g a g a g g u a c g g g g G u u .                                                                        | 2    | 1 | seq |
| .u g c g a g a g g A a c g g g g a u u .                                                                        | 1    | 1 | seq |
| .u g c g a g G g g u a c g g g g a u u .                                                                        | 3    | 1 | seq |
| .u g c g a g a g g u a c g g g g a u u .                                                                        | 449  | 0 | seq |
| .u g c g a g a g g u a c g A g g a u u .                                                                        | 1    | 1 | seq |
| .u g U g a g a g g u a c g g g g a u u .                                                                        | 1    | 1 | seq |
| .u g c g a g a g g C a c g g g g a u u .                                                                        | 5    | 1 | seq |
| .u g c g a g a g g u a c g g g g C u u g .                                                                      | 1    | 1 | seq |
| .u g c g a g a g g u a c g g g g a u u A .                                                                      | 2    | 1 | seq |
| .u g c g a g a g g u a c g g g g a C u g .                                                                      | 1    | 1 | seq |
| .C g c g a g a g g u a c g g g g a u u g .                                                                      | 1    | 1 | seq |

# Mature Star

|                                                                                                          |     |   |     |
|----------------------------------------------------------------------------------------------------------|-----|---|-----|
| guagagcgucgcuuagcaugcgagagguacggggauugauaccccgcaucuccaucgugcuuuuuuucaaaguuuucauuuuuuugacuuagcucaaacauucg |     |   |     |
| .....ugcgagagguacggggGuug.....                                                                           | 1   | 1 | seq |
| .....ugcgagagguacggggauAg.....                                                                           | 14  | 1 | seq |
| .....ugcgagagguacggggauug.....                                                                           | 48  | 0 | seq |
| .....ugcgagagguacggggauGg.....                                                                           | 6   | 1 | seq |
| .....gcgagagguacgggggaC.....                                                                             | 41  | 1 | seq |
| .....Ncgagagguacggggau.....                                                                              | 2   | 1 | seq |
| .....gcgagagguacggggCu.....                                                                              | 14  | 1 | seq |
| .....gcgagagguacgggggaG.....                                                                             | 3   | 1 | seq |
| .....gcgagagguacggggau.....                                                                              | 331 | 0 | seq |
| .....gcgagagUuacggggau.....                                                                              | 2   | 1 | seq |
| .....Ccgagagguacggggau.....                                                                              | 1   | 1 | seq |
| .....gcgagagguGcgggggu.....                                                                              | 1   | 1 | seq |
| .....gcgagagguacgggggaA.....                                                                             | 1   | 1 | seq |
| .....gcgagagguacggggauu.....                                                                             | 262 | 0 | seq |
| .....gcgagagguauGggggauu.....                                                                            | 2   | 1 | seq |
| .....gcgagagguacggggauG.....                                                                             | 7   | 1 | seq |
| .....gcgCgagguacggggauu.....                                                                             | 1   | 1 | seq |
| .....gcgagagguacgggggaGu.....                                                                            | 2   | 1 | seq |
| .....gcCagagguacggggauu.....                                                                             | 1   | 1 | seq |
| .....gcgagagguacgggggaCu.....                                                                            | 3   | 1 | seq |
| .....gcgagagguacgggggaA.....                                                                             | 62  | 1 | seq |
| .....gcgagaggCacggggauu.....                                                                             | 1   | 1 | seq |
| .....gcgagagguacggggCu.....                                                                              | 1   | 1 | seq |
| .....gcgagagguacggggGu.....                                                                              | 4   | 1 | seq |
| .....gcgagaUguacggggauu.....                                                                             | 1   | 1 | seq |
| .....gcgagagAuacggggauu.....                                                                             | 1   | 1 | seq |
| .....gcgagCgguacggggauu.....                                                                             | 1   | 1 | seq |
| .....gcgagGgguacggggauu.....                                                                             | 1   | 1 | seq |
| .....gcgagagguacggggauug.....                                                                            | 10  | 0 | seq |
| .....gcgagagguacggggauuC.....                                                                            | 1   | 1 | seq |
| .....gcgagagguacggggauAg.....                                                                            | 6   | 1 | seq |
| .....gcgagagguacggggauuA.....                                                                            | 1   | 1 | seq |
| .....gcgagagguacggggauGg.....                                                                            | 1   | 1 | seq |
| .....gcgagagguacggggauugUu.....                                                                          | 1   | 1 | seq |
| .....cgagagguacgggggaCu.....                                                                             | 1   | 1 | seq |
| .....cgagagguacggggauu.....                                                                              | 5   | 0 | seq |
| .....cgagagguacgggggaG.....                                                                              | 1   | 1 | seq |
| .....cgagagUuacggggauu.....                                                                              | 1   | 1 | seq |
| .....cgagagguacggggauGga.....                                                                            | 1   | 1 | seq |
| .....gagagguacggggauug.....                                                                              | 5   | 0 | seq |
| .....gagagguacggggauAg.....                                                                              | 2   | 1 | seq |
| .....gauaccccgcaucucca.....                                                                              | 1   | 0 | seq |
| .....gauaccccgcaucuccaCcg.....                                                                           | 1   | 1 | seq |
| .....auaccccgcaucuccau.....                                                                              | 1   | 0 | seq |
| .....auaccccgcaucuccaCcg.....                                                                            | 9   | 1 | seq |
| .....uaccccgcaucuccaGc.....                                                                              | 1   | 1 | seq |
| .....uaccccgcaucuccauc.....                                                                              | 6   | 0 | seq |
| .....uGcccgcaucuccauc.....                                                                               | 1   | 1 | seq |
| .....uaccccgcaucuccaCcg.....                                                                             | 203 | 1 | seq |
| .....uaccccgcaucuccaucg.....                                                                             | 1   | 0 | seq |
| .....uaccccgcaucuccaAcg.....                                                                             | 1   | 1 | seq |
| .....accccgcaucuccaCcg.....                                                                              | 257 | 1 | seq |
| .....Ucccgcaucuccaucg.....                                                                               | 1   | 1 | seq |
| .....accccgcaucuccaucguU.....                                                                            | 1   | 1 | seq |

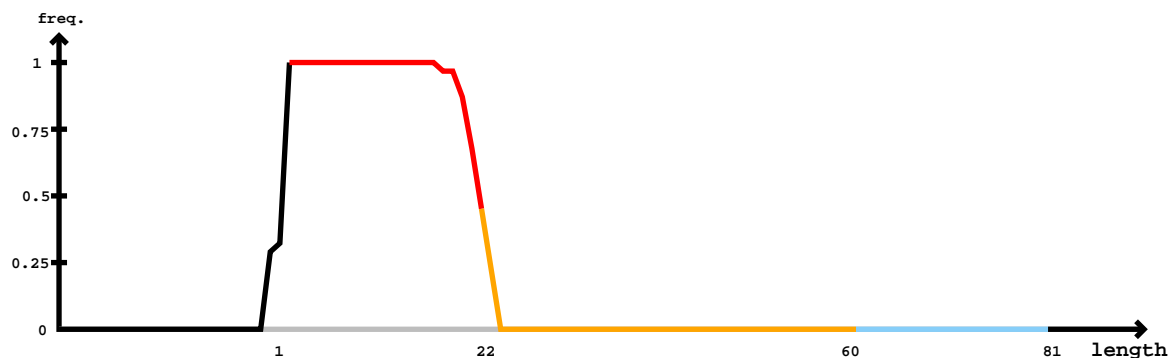

Star

[illegible]

[illegible]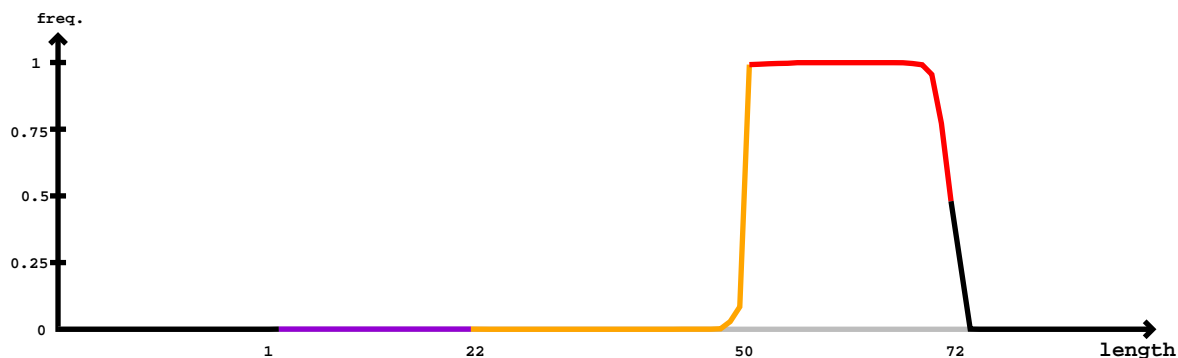

## Mature

| 5' | cauuggcaguccccucacauug <u>uguc</u> aaauuauu <u>caag</u> caauu <u>uacag</u> caaugcuagaucggcgguug <u>uac</u> auugcuugagua <u>aacuuga</u> acacuauggguugcagauuguuuggg | -3'   | obs    |     |
|----|-------------------------------------------------------------------------------------------------------------------------------------------------------------------|-------|--------|-----|
|    | cauuggcaguccccucacauug <u>uguc</u> aaauuauu <u>caag</u> caauu <u>uacag</u> caaugcuagaucggcgguug <u>uac</u> auugcuugagua <u>aacuuga</u> acacuauggguugcagauuguuuggg |       | exp    |     |
|    | (...(((((((.....(((.(((((((.(((((((((((((((.(((((((.....(((.....)))))))))).)))))))))))))).))))).)))))).)))).....)))))))).).                                       | reads | mm     |     |
|    | ..... <u>uguc</u> aaauuauu <u>caag</u> Uaaau.....                                                                                                                 |       | sample |     |
|    | .....Cuguacauugcuugaguaacuugaacacu.....                                                                                                                           | 2     | 1      | seq |
|    | .....acauugcuugagUGacuugaaca.....                                                                                                                                 | 1     | 1      | seq |
|    | .....acauugcuugaguaacuugaacac.....                                                                                                                                | 1     | 1      | seq |
|    | .....acauugcuugaguaacuugaacacu.....                                                                                                                               | 2     | 0      | seq |
|    | .....cauugcuugaguaacuugaac.....                                                                                                                                   | 2     | 0      | seq |
|    | .....cauugcuugaguaacuugaac.....                                                                                                                                   | 3     | 0      | seq |
|    | .....cauucCuugaguaacuugaaca.....                                                                                                                                  | 1     | 1      | seq |
|    | .....cauugcuugaguaacuugaaca.....                                                                                                                                  | 80    | 0      | seq |
|    | .....cauugcuugaguaacuugaUca.....                                                                                                                                  | 1     | 1      | seq |
|    | .....cauugcuugaguaacuugGaca.....                                                                                                                                  | 1     | 1      | seq |
|    | .....cauugcuugaguaaUuugaaca.....                                                                                                                                  | 1     | 1      | seq |
|    | .....cauugcuugGguaacuugaaca.....                                                                                                                                  | 1     | 1      | seq |
|    | .....cauugcuugaguaacuugaacG.....                                                                                                                                  | 1     | 1      | seq |
|    | .....cauugcuCgaguaacuugaaca.....                                                                                                                                  | 3     | 1      | seq |
|    | .....auugcuugaguaacuug.....                                                                                                                                       | 1     | 1      | seq |
|    | .....auugcuugaguaacuugaac.....                                                                                                                                    | 1     | 0      | seq |
|    | .....auugcuugaguaacuugaac.....                                                                                                                                    | 7     | 0      | seq |
|    | .....auugcuugaguaacCugaaca.....                                                                                                                                   | 1     | 0      | seq |
|    | .....auAgcuugaguaacuugaaca.....                                                                                                                                   | 1     | 1      | seq |
|    | .....auugcuugagCaacuugaaca.....                                                                                                                                   | 1     | 1      | seq |
|    | .....Guugcuugaguaacuugaaca.....                                                                                                                                   | 2     | 1      | seq |
|    | .....auugcCugaguaacuugaaca.....                                                                                                                                   | 1     | 1      | seq |
|    | .....auugcCugaguaacuugaaca.....                                                                                                                                   | 1     | 1      | seq |
|    | .....auugcuugaguaacuugaGca.....                                                                                                                                   | 1     | 1      | seq |
|    | .....auCgcuugaguaacuugaaca.....                                                                                                                                   | 1     | 1      | seq |
|    | .....auugcuugGguaacuugaaca.....                                                                                                                                   | 1     | 1      | seq |
|    | .....auugcuugaguaacuugaacU.....                                                                                                                                   | 1     | 1      | seq |
|    | .....auugcuCgaguaacuugaaca.....                                                                                                                                   | 1     | 1      | seq |
|    | .....auugcuugaguaacuugaaca.....                                                                                                                                   | 170   | 0      | seq |
|    | .....uugcuugaguaacuuga.....                                                                                                                                       | 10    | 0      | seq |
|    | .....uugcuugaguaacuugaa.....                                                                                                                                      | 16    | 0      | seq |
|    | .....uugcCugaguaacuugaac.....                                                                                                                                     | 1     | 1      | seq |
|    | .....Augcuugaguaacuugaac.....                                                                                                                                     | 1     | 1      | seq |
|    | .....uugcuugaguaacuugaCc.....                                                                                                                                     | 1     | 1      | seq |
|    | .....uugcuCgaguaacuugaac.....                                                                                                                                     | 1     | 1      | seq |

## Star

## Mature

cauuggcagucccucacauugugucaaaauuucaagcaauuuacagcaaugcuagaucggcguuguacauugcuugaguaaacuugaacacuaugguugcagauuguuuggg

|                                     |      |   |     |
|-------------------------------------|------|---|-----|
| .....uugcuugaguaaacuugaaU.....      | 3    | 1 | seq |
| .....uugcuugaguaaacuugaaA.....      | 1    | 1 | seq |
| .....uugcuugaguaaacuugaac.....      | 99   | 0 | seq |
| .....uugcuugaguaaacUCgaac.....      | 1    | 1 | seq |
| .....uugcuugagCaacuugaac.....       | 1    | 1 | seq |
| .....uugcuugaguaaacCugaac.....      | 2    | 1 | seq |
| .....uuAcuugaguaaacuugaaca.....     | 1    | 1 | seq |
| .....uugcuugaguaaUuugaaca.....      | 1    | 1 | seq |
| .....Nugcuugaguaaacuugaaca.....     | 1    | 1 | seq |
| .....uugcuugaguaGcuugaaca.....      | 1    | 1 | seq |
| .....uugcuAgaguaaacuugaaca.....     | 1    | 1 | seq |
| .....uugcuugaguaaacuugaaUa.....     | 1    | 1 | seq |
| .....uugcuugagCaacuugaaca.....      | 1    | 1 | seq |
| .....uugcuugaguaaacuugGaca.....     | 2    | 1 | seq |
| .....uugcuugaguaaacuugaaca.....     | 325  | 0 | seq |
| .....uugcuugaguaacCugaaca.....      | 1    | 1 | seq |
| .....uugcuugaguaaacuugaacU.....     | 7    | 1 | seq |
| .....uugUuugaguaaacuugaaca.....     | 1    | 1 | seq |
| .....uugcuugaguaaacuugaacC.....     | 1    | 1 | seq |
| .....uugcuugaguaaacUCgaaca.....     | 1    | 1 | seq |
| .....uugcuugaguGacuugaaca.....      | 1    | 1 | seq |
| .....uugcuugaguaCcuugaacac.....     | 1    | 1 | seq |
| .....uugcuugaguaaGuugaacac.....     | 1    | 1 | seq |
| .....uugcuugaguaaacuugaacac.....    | 876  | 0 | seq |
| .....uugcuugagCaacuugaacac.....     | 5    | 1 | seq |
| .....uugcuCgaguaaacuugaacac.....    | 1    | 1 | seq |
| .....uugcuugGguaaacuugaacac.....    | 4    | 1 | seq |
| .....uugcuugaguaaacUCgaacac.....    | 2    | 1 | seq |
| .....uuAcuugaguaaacuugaacac.....    | 1    | 1 | seq |
| .....uugcuugaguCacuugaacac.....     | 1    | 1 | seq |
| .....uugcuugaguaUcuugaacac.....     | 1    | 1 | seq |
| .....uugcuugaguaaacuugaacaU.....    | 58   | 1 | seq |
| .....uugcGugaguaaacuugaacac.....    | 1    | 1 | seq |
| .....uugcuugaguaaacuugaacaA.....    | 5    | 1 | seq |
| .....uugcuugaAuaacuugaacac.....     | 1    | 1 | seq |
| .....uugcuugaguaaacuugaacCc.....    | 1    | 1 | seq |
| .....uugcuugaguaaacuuAaacac.....    | 1    | 1 | seq |
| .....uugcuugaguaaacuAgaacac.....    | 1    | 1 | seq |
| .....uugcuugaguaaacuugaaUac.....    | 1    | 1 | seq |
| .....uugcuugaguaaacuugaUcac.....    | 1    | 1 | seq |
| .....Cugcuugaguaaacuugaacac.....    | 4    | 1 | seq |
| .....uAgcuugaguaaacuugaacac.....    | 2    | 1 | seq |
| .....uugUuugaguaaacuugaacac.....    | 1    | 1 | seq |
| .....uugcuugaguaaacAugaacac.....    | 1    | 1 | seq |
| .....uGcuugaguaaacuugaacac.....     | 4    | 1 | seq |
| .....Augcuugaguaaacuugaacac.....    | 2    | 1 | seq |
| .....uugcuugaguaaacuugaGcac.....    | 4    | 1 | seq |
| .....Gugcuugaguaaacuugaacac.....    | 1    | 1 | seq |
| .....uugcuugaguaaacuugGacac.....    | 1    | 1 | seq |
| .....uugcuugaguaaacCugaacac.....    | 2    | 1 | seq |
| .....uugcuugaguaaacuugaacaG.....    | 2    | 1 | seq |
| .....uugcuugaguaGcuugaacac.....     | 1    | 1 | seq |
| .....uugcuugaguaaacuugaCcacu.....   | 1    | 1 | seq |
| .....uugcuugaguaGcuugaacacu.....    | 1    | 1 | seq |
| .....uugcuugaguaaacuugGacacu.....   | 2    | 1 | seq |
| .....uugcuugaguaaacuugaacaUu.....   | 8    | 1 | seq |
| .....uugcuugaguaaacUCgaacacu.....   | 1    | 1 | seq |
| .....uugcuugaguaaacuugaaGacu.....   | 1    | 1 | seq |
| .....uugcuugaguaaacuugaUcacu.....   | 1    | 1 | seq |
| .....uugcuugGguaaacuugaacacu.....   | 1    | 1 | seq |
| .....uugcuugaguaaacuugaacacu.....   | 258  | 0 | seq |
| .....uugcuugaguaaacuugaacacC.....   | 64   | 1 | seq |
| .....uugUuugaguaaacuugaacacu.....   | 2    | 1 | seq |
| .....uugcuugaguaaacuugaacacG.....   | 1272 | 1 | seq |
| .....uugcuugaguaaacuugaGcacu.....   | 3    | 1 | seq |
| .....uugcuugaguaaacuugaacacuU.....  | 2    | 1 | seq |
| .....uugcuugaguaaacuugaacacuC.....  | 1    | 1 | seq |
| .....uugcuugaguaaacuugaacacCa.....  | 3    | 1 | seq |
| .....uugcuugaguaaacuugaacacuUu..... | 2    | 1 | seq |
| .....ugcuugaguaaacuugaaca.....      | 5    | 0 | seq |

Star

Mature

|                                                                                                                             |   |   |     |
|-----------------------------------------------------------------------------------------------------------------------------|---|---|-----|
| cauuggcagucccucacauug <u>ugucaaaauuauucaagcaauuuacagcaaugcuagaucggcguguuacauugcuugaguaacuugaacacac</u> uagguugcagauuguuuggg |   |   |     |
| .....gcuugaguaacuugaac.....                                                                                                 | 3 | 0 | seq |
| .....gcuugaguaacuugaaca.....                                                                                                | 1 | 0 | seq |
| .....gcuugaguaacuugaacaU.....                                                                                               | 1 | 1 | seq |
| .....gcuugaguaacuugaacac.....                                                                                               | 1 | 0 | seq |
| .....cuugaguaacuugaaca.....                                                                                                 | 1 | 0 | seq |
| .....Uuugaguaacuugaacac.....                                                                                                | 1 | 1 | seq |
| .....cuugaguaacuugaacac.....                                                                                                | 1 | 0 | seq |
| .....cuugaguaacuugaacacu.....                                                                                               | 1 | 0 | seq |
| .....uugaguaacuugaacac.....                                                                                                 | 1 | 0 | seq |
| .....uugaguaacuugaacacu.....                                                                                                | 1 | 0 | seq |
| .....ugaguaacuugaacacC.....                                                                                                 | 1 | 1 | seq |
| .....ugaguaacuugaacacu.....                                                                                                 | 1 | 0 | seq |
| .....ugaguaacuugaacacG.....                                                                                                 | 6 | 1 | seq |

Provisional ID : MA\_90132\_12483  
Score total : 0.4  
Score for star read(s) : -1.3  
Score for read counts : 0  
Score for mfe : 0.1  
Score for randfold : 1.6  
Score for cons. seed :  
Total read count : 2635  
Mature read count : 2634  
Loop read count : 0  
Star read count : 1

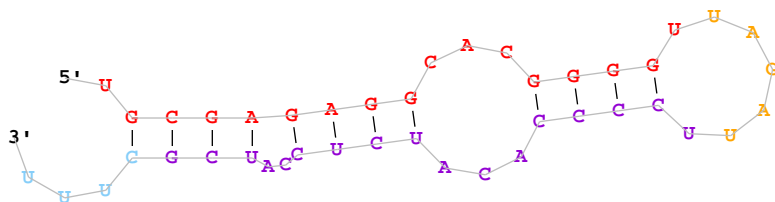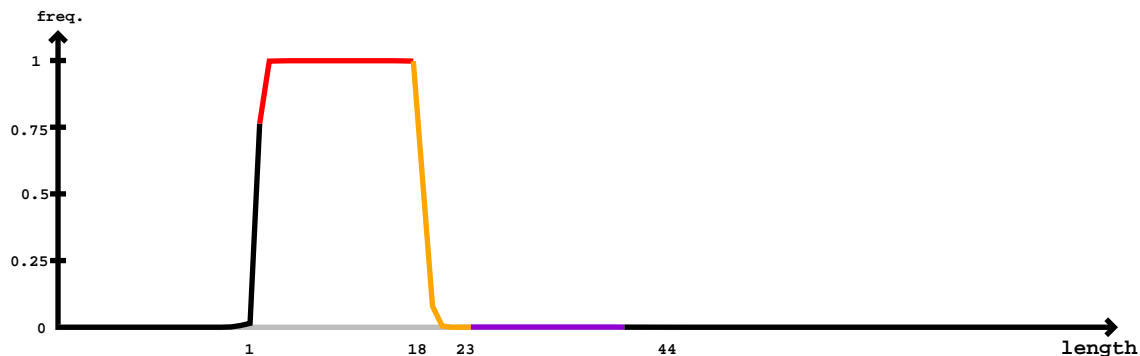

## Mature Star

| 5' -  | guagaguacuuucuuugcaugcgagaggcacgggguuagauuuccccacaucuccaucgcuuugguuaguuagcauccugauauauccuuuugaucaaugucguug | -3'   | obs |        |
|-------|------------------------------------------------------------------------------------------------------------|-------|-----|--------|
|       | guagaguacuuucuuugcaugcgagaggcacgggguuagauuuccccacaucuccaucgcuuugguuaguuagcauccugauauauccuuuugaucaaugucguug |       | exp |        |
|       | (((((.....))))).(((((((.....))))).))))).)))).....(((.....))))).)))).....                                   | reads | mm  | sample |
| ..... | gcaugcgagaggcacgggguu.....                                                                                 | 1     | 0   | seq    |
| ..... | gcUugcgagaggcacgggguu.....                                                                                 | 2     | 1   | seq    |
| ..... | caugcgagaggcacggg.....                                                                                     | 1     | 0   | seq    |
| ..... | cCugcgagaggcacggg.....                                                                                     | 1     | 1   | seq    |
| ..... | caugcgagaggcacggg.....                                                                                     | 1     | 0   | seq    |
| ..... | cGugcgagaggcacggg.....                                                                                     | 1     | 1   | seq    |
| ..... | cGugcgagaggcacgggu.....                                                                                    | 2     | 1   | seq    |
| ..... | cCugcgagaggcacgggu.....                                                                                    | 1     | 1   | seq    |
| ..... | caugcgagaggcacgggu.....                                                                                    | 1     | 0   | seq    |
| ..... | cUugcgagaggcacgggu.....                                                                                    | 1     | 1   | seq    |
| ..... | cUugcgagaggcacgggu.....                                                                                    | 2     | 1   | seq    |
| ..... | cGugcgagaggcacgggu.....                                                                                    | 1     | 1   | seq    |
| ..... | caugcgagaggcacgggu.....                                                                                    | 2     | 0   | seq    |
| ..... | Uugcgagaggcacgggu.....                                                                                     | 1     | 1   | seq    |
| ..... | augcgagaggcacgggu.....                                                                                     | 3     | 0   | seq    |
| ..... | Cugcgagaggcacgggu.....                                                                                     | 2     | 1   | seq    |
| ..... | Gugcgagaggcacgggu.....                                                                                     | 4     | 1   | seq    |
| ..... | augcgagaggcacgggu.....                                                                                     | 4     | 0   | seq    |
| ..... | Gugcgagaggcacgggu.....                                                                                     | 3     | 1   | seq    |
| ..... | Cugcgagaggcacgggu.....                                                                                     | 1     | 1   | seq    |
| ..... | Uugcgagaggcacgggu.....                                                                                     | 3     | 1   | seq    |
| ..... | Cugcgagaggcacggguua.....                                                                                   | 1     | 1   | seq    |
| ..... | ugcgagaggcGcggggu.....                                                                                     | 1     | 1   | seq    |
| ..... | uGAgagaggcacgggu.....                                                                                      | 1     | 1   | seq    |
| ..... | ugcgagaggcacgggG.....                                                                                      | 37    | 1   | seq    |
| ..... | Cgcgagaggcacgggu.....                                                                                      | 2     | 1   | seq    |
| ..... | ugcgagaggcacggAgu.....                                                                                     | 3     | 1   | seq    |
| ..... | Ngcgagaggcacgggu.....                                                                                      | 2     | 1   | seq    |
| ..... | ugcgagaggcacgggC.....                                                                                      | 149   | 1   | seq    |
| ..... | ugcgagaggAacgggu.....                                                                                      | 1     | 1   | seq    |
| ..... | uAcgagaggcacgggu.....                                                                                      | 1     | 1   | seq    |
| ..... | ugcgUgaggcacgggu.....                                                                                      | 1     | 1   | seq    |
| ..... | ugcgagaggcacgggCu.....                                                                                     | 1     | 1   | seq    |



# Mature Star

|                                                                                                               |     |   |     |
|---------------------------------------------------------------------------------------------------------------|-----|---|-----|
| guagaguacuuuucuuugcaugcgagaggcacgggguuagauuuccccacauccuacgcguuuugguauguaauagcauccugauauauccuuuugaucaaugucguug |     |   |     |
| .....ugcgagGggcacgggggu.....                                                                                  | 2   | 1 | seq |
| .....ugcgagaggcacgggggu.....                                                                                  | 903 | 0 | seq |
| .....ugcgagaggcacgAggu.....                                                                                   | 2   | 1 | seq |
| .....ugcgagaggcacgggAu.....                                                                                   | 1   | 1 | seq |
| .....ugcgagaggcacgggUu.....                                                                                   | 1   | 1 | seq |
| .....ugcgagagGAcacgggggu.....                                                                                 | 4   | 1 | seq |
| .....ugcgagaggcUcgggggu.....                                                                                  | 1   | 1 | seq |
| .....ugcgaAaggcacggggguu.....                                                                                 | 1   | 1 | seq |
| .....ugcgUgaggcacggggguu.....                                                                                 | 1   | 1 | seq |
| .....ugcgagaggcGcggggguu.....                                                                                 | 3   | 1 | seq |
| .....ugcgagaggcacggggGu.....                                                                                  | 2   | 1 | seq |
| .....Ccgagaggcacggggguu.....                                                                                  | 4   | 1 | seq |
| .....ugcgagaggGAcggggguu.....                                                                                 | 1   | 1 | seq |
| .....ugcgagaggcacggggguu.....                                                                                 | 588 | 0 | seq |
| .....ugcgagaggcacggggCu.....                                                                                  | 2   | 1 | seq |
| .....ugcgagaggcacggggguG.....                                                                                 | 12  | 1 | seq |
| .....Gcgagaggcacggggguu.....                                                                                  | 1   | 1 | seq |
| .....ugcgagagGAcacggggguu.....                                                                                | 1   | 1 | seq |
| .....ugcgagaggcacggggguC.....                                                                                 | 93  | 1 | seq |
| .....ugcgGgaggcacggggguu.....                                                                                 | 1   | 1 | seq |
| .....uAcgagaggcacggggguu.....                                                                                 | 1   | 1 | seq |
| .....ugcgagaggcaUggggguu.....                                                                                 | 2   | 1 | seq |
| .....ugcgagaggcacgggUuu.....                                                                                  | 3   | 1 | seq |
| .....ugUgagaggcacggggguu.....                                                                                 | 3   | 1 | seq |
| .....ugcgagaggcacUggguu.....                                                                                  | 1   | 1 | seq |
| .....ugcgagaggcacggggAu.....                                                                                  | 2   | 1 | seq |
| .....ugcgagaggcacggggguu.....                                                                                 | 30  | 0 | seq |
| .....ugcgagaggcacggggguuG.....                                                                                | 2   | 1 | seq |
| .....ugcgagaggUacggggguu.....                                                                                 | 103 | 1 | seq |
| .....ugcgagaggUacggggguuag.....                                                                               | 6   | 1 | seq |
| .....gcgagaggcacggggguC.....                                                                                  | 71  | 1 | seq |
| .....gcgagGggcacggggguu.....                                                                                  | 2   | 1 | seq |
| .....gcgagaggcacggggguG.....                                                                                  | 8   | 1 | seq |
| .....gcgagaggcCcggggguu.....                                                                                  | 1   | 1 | seq |
| .....gcgagaggcUcggggguu.....                                                                                  | 1   | 1 | seq |
| .....gcgagaggcacgggUguu.....                                                                                  | 1   | 1 | seq |
| .....gcgGgaggcacggggguu.....                                                                                  | 1   | 1 | seq |
| .....gcgauaggcacggggguu.....                                                                                  | 1   | 1 | seq |
| .....gcgagaggcacggggGu.....                                                                                   | 2   | 1 | seq |
| .....Ucgagaggcacggggguu.....                                                                                  | 1   | 1 | seq |
| .....gUgagaggcacggggguu.....                                                                                  | 3   | 1 | seq |
| .....gcgagaggcacggggguu.....                                                                                  | 463 | 0 | seq |
| .....gcgagaggcacggggCu.....                                                                                   | 1   | 1 | seq |
| .....gcgagaggGAcggggguu.....                                                                                  | 1   | 1 | seq |
| .....gcgagaggcacggggguGa.....                                                                                 | 1   | 1 | seq |
| .....gcgagaggcacggggguuG.....                                                                                 | 1   | 1 | seq |
| .....gcgagaggUacggggguu.....                                                                                  | 41  | 1 | seq |
| .....gcgagaggcacggggguA.....                                                                                  | 1   | 1 | seq |
| .....gcgagUggcacggggguu.....                                                                                  | 2   | 1 | seq |
| .....gcgagaggcacggggguu.....                                                                                  | 10  | 0 | seq |
| .....gcgagaggGAcggggguu.....                                                                                  | 1   | 1 | seq |
| .....gcgagaggcacggggguuag.....                                                                                | 2   | 0 | seq |
| .....gcgagaggUacggggguuag.....                                                                                | 2   | 1 | seq |
| .....cgagaggUacggggguu.....                                                                                   | 1   | 1 | seq |
| .....cgagaggUacggggguuag.....                                                                                 | 1   | 1 | seq |
| .....gagaggUacggggguuag.....                                                                                  | 2   | 1 | seq |
| .....uuccccacaucccaCc.....                                                                                    | 1   | 1 | seq |
| .....uccccGcaucuccaucg.....                                                                                   | 1   | 1 | seq |

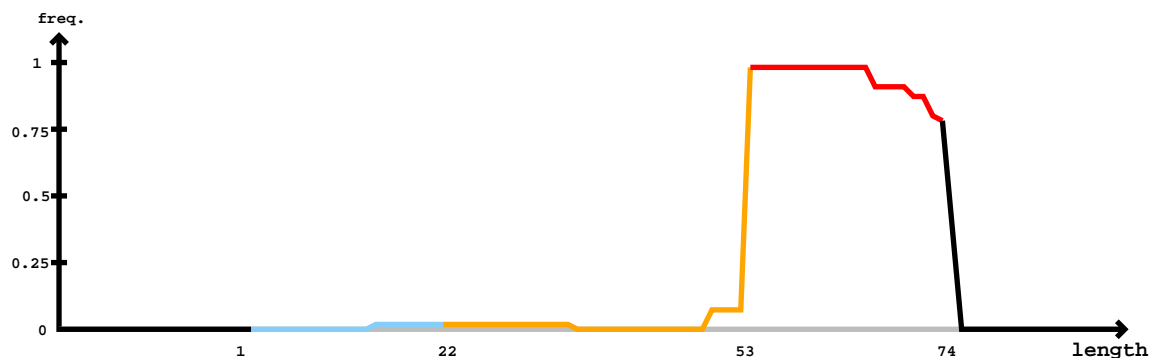

## Mature

Provisional ID : MA\_9051765\_36252  
Score total : 1.3  
Score for star read(s) : -1.3  
Score for read counts : 0  
Score for mfe : 1  
Score for randfold : 1.6  
Score for cons. seed :  
Total read count : 222205  
Mature read count : 222205  
Loop read count : 0  
Star read count : 0

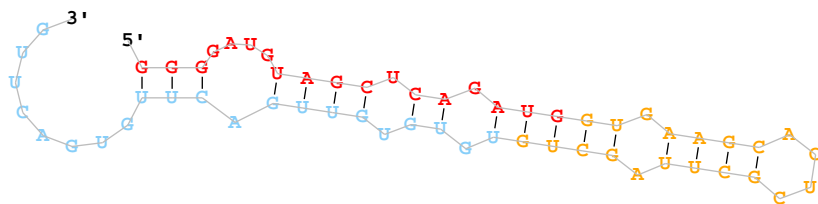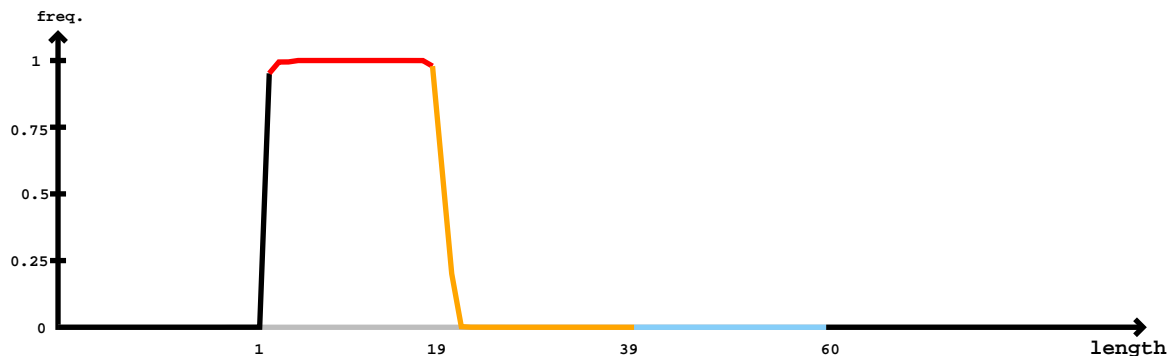

**Mature**

**Star**

| 5' -                                                                                                              |       | -3' | exp    |  |
|-------------------------------------------------------------------------------------------------------------------|-------|-----|--------|--|
| uuuaucaucaauagguuaggggauguagcucagagugugaagcacucgcuagcuguguguguugacuugacucauagagagagauuggcacuuacgcu                |       |     |        |  |
| ((((((((((((((((((((((((((((((((((((((((((((((((((((((((((((((((((((((((((((((((((((((((((((((((((((((((((((((((( | reads | mm  | sample |  |
| .....agguuCgggggauguagcuc.....                                                                                    | 1     | 1   | seq    |  |
| .....ggGuaggggauguagcuc.....                                                                                      | 1     | 1   | seq    |  |
| .....ggGuaggggauguagcuc.....                                                                                      | 1     | 1   | seq    |  |
| .....gguuCgggggauguagcuc.....                                                                                     | 1     | 1   | seq    |  |
| .....gguuCgggggauguagcucag.....                                                                                   | 1     | 1   | seq    |  |
| .....gguuCgggggauguagcucagag.....                                                                                 | 4     | 1   | seq    |  |
| .....gguuCgggggauguagcucagagug.....                                                                               | 1     | 1   | seq    |  |
| .....guuagggAgauguagcuc.....                                                                                      | 1     | 1   | seq    |  |
| .....guCaggggauguagcuc.....                                                                                       | 2     | 1   | seq    |  |
| .....guuCgggggauguagcuc.....                                                                                      | 2     | 1   | seq    |  |
| .....guuUgggggauguagcucagag.....                                                                                  | 2     | 1   | seq    |  |
| .....guuCgggggauguagcucagagug.....                                                                                | 1     | 1   | seq    |  |
| .....Caggggauguagcucag.....                                                                                       | 1     | 1   | seq    |  |
| .....uaggggauguagcucag.....                                                                                       | 1     | 0   | seq    |  |
| .....Caggggauguagcucagag.....                                                                                     | 2     | 1   | seq    |  |
| .....uGgggggauguagcucagag.....                                                                                    | 1     | 1   | seq    |  |
| .....aggggauguagcucagag.....                                                                                      | 9     | 0   | seq    |  |
| .....aggggauguagcucagCa.....                                                                                      | 2     | 1   | seq    |  |
| .....aggggauguagcucagagug.....                                                                                    | 2     | 0   | seq    |  |
| .....aggggCuguagcucagagug.....                                                                                    | 1     | 1   | seq    |  |
| .....aggggauguagcucagagug.....                                                                                    | 1     | 0   | seq    |  |
| .....aggggauguagcucagagugA.....                                                                                   | 1     | 1   | seq    |  |
| .....aggggauguagAucagagug.....                                                                                    | 1     | 1   | seq    |  |
| .....aggggauguagcucagaguggu.....                                                                                  | 1     | 0   | seq    |  |
| .....gggggauguagcucUgau.....                                                                                      | 4     | 1   | seq    |  |
| .....Nggggauguagcucagau.....                                                                                      | 7     | 1   | seq    |  |
| .....gggggauguagcuAagau.....                                                                                      | 1     | 1   | seq    |  |
| .....gggggauguUgcucagau.....                                                                                      | 2     | 1   | seq    |  |
| .....gggggauguagcucagau.....                                                                                      | 4494  | 0   | seq    |  |
| .....ggggaAguagcucagau.....                                                                                       | 3     | 1   | seq    |  |
| .....gggggauguagcucagUu.....                                                                                      | 4     | 1   | seq    |  |
| .....gggggauguagcucagGu.....                                                                                      | 29    | 1   | seq    |  |
| .....gggggauguagAucagau.....                                                                                      | 2     | 1   | seq    |  |

## Mature

## Star

uuuauucucaauaggguuagggggauguagcucagagggugaagcacucgcuuagcuguguguguuagacuugugacuuagacucacauagagagagagagauuggcacuuacgcu

|                                |       |   |     |
|--------------------------------|-------|---|-----|
| .....gggggauguagcucagaa.....   | 54    | 1 | seq |
| .....gggggauguagcCagau.....    | 14    | 1 | seq |
| .....gUgggauguagcucagau.....   | 3     | 1 | seq |
| .....gCgggauguagcucagau.....   | 1     | 1 | seq |
| .....ggggauuauagcucagau.....   | 5     | 1 | seq |
| .....gggAauguagcucagau.....    | 1     | 1 | seq |
| .....gggggauguagUucagau.....   | 9     | 1 | seq |
| .....gggggaugAagcucagau.....   | 1     | 1 | seq |
| .....gggggauguagcucCgau.....   | 1     | 1 | seq |
| .....gggggauguagcuGagau.....   | 1     | 1 | seq |
| .....gggggauguagcAcagau.....   | 1     | 1 | seq |
| .....gggUauguagcucagau.....    | 1     | 1 | seq |
| .....ggggUuguagcucagau.....    | 2     | 1 | seq |
| .....gCgggauguagcucagau.....   | 6     | 1 | seq |
| .....gggggUuguagcucagaug.....  | 18    | 1 | seq |
| .....gggggauguagcAcagaug.....  | 47    | 1 | seq |
| .....Cgggauguagcucagaug.....   | 31    | 1 | seq |
| .....gggggauguagcucCgaug.....  | 19    | 1 | seq |
| .....gggggauguaCucagaug.....   | 13    | 1 | seq |
| .....gggggauguagcucagaug.....  | 95749 | 0 | seq |
| .....gggggauguagcucagUug.....  | 24    | 1 | seq |
| .....gggggaGguagcucagaug.....  | 20    | 1 | seq |
| .....gggggauguagcucagaCg.....  | 859   | 1 | seq |
| .....gggUauguagcucagaug.....   | 39    | 1 | seq |
| .....Nggggauguagcucagaug.....  | 117   | 1 | seq |
| .....ggCgauguagcucagaug.....   | 6     | 1 | seq |
| .....gggggauguagcGcagaug.....  | 8     | 1 | seq |
| .....gggAauguagcucagaug.....   | 31    | 1 | seq |
| .....gggggauguGgcucagaug.....  | 268   | 1 | seq |
| .....gggggaugAagcucagaug.....  | 20    | 1 | seq |
| .....ggggauuauagcucagaug.....  | 48    | 1 | seq |
| .....gUgggauguagcucagaug.....  | 27    | 1 | seq |
| .....gggggauguagcucagaug.....  | 22    | 1 | seq |
| .....gggggauCuaucucagaug.....  | 10    | 1 | seq |
| .....gggggauguagAucagaug.....  | 24    | 1 | seq |
| .....gggggauguagcuAagaug.....  | 18    | 1 | seq |
| .....gggggauguagcucagaAag..... | 118   | 1 | seq |
| .....gggggauguCgcucagaug.....  | 11    | 1 | seq |
| .....gggggauguagcucagGug.....  | 435   | 1 | seq |
| .....gggggauguagcucagauU.....  | 348   | 1 | seq |
| .....gggggauguagcuGagaug.....  | 32    | 1 | seq |
| .....gggggauguagcucUgaug.....  | 45    | 1 | seq |
| .....ggggCuguagcucagaug.....   | 25    | 1 | seq |
| .....gggggauguUgcucagaug.....  | 57    | 1 | seq |
| .....gggggauguagcCcagaug.....  | 253   | 1 | seq |
| .....gggggauguagUucagaug.....  | 131   | 1 | seq |
| .....gggggauguagcucagaCgg..... | 295   | 1 | seq |
| .....ggCgauguagcucagaugg.....  | 7     | 1 | seq |
| .....gggggauguagcucUgaugg..... | 27    | 1 | seq |
| .....gggggauguagcucagaugg..... | 63694 | 0 | seq |
| .....gggggauguagcucagaugC..... | 535   | 1 | seq |
| .....gggCauguagcucagaugg.....  | 1     | 1 | seq |
| .....gggggauguGgcucagaugg..... | 196   | 1 | seq |
| .....gggggauguagcucagaugg..... | 24    | 1 | seq |
| .....gggggauguagAucagaugg..... | 17    | 1 | seq |
| .....gggggauguagcucCgaugg..... | 13    | 1 | seq |
| .....gggUauguagcucagaugg.....  | 23    | 1 | seq |
| .....gggggauguaCucagaugg.....  | 8     | 1 | seq |
| .....gggggauguagcucagUugg..... | 26    | 1 | seq |
| .....gggggauguagUucagaugg..... | 64    | 1 | seq |
| .....gggggauguagcucagGugg..... | 215   | 1 | seq |
| .....gggggauCuaucucagaugg..... | 4     | 1 | seq |
| .....gggggauguagcuGagaugg..... | 8     | 1 | seq |
| .....gggggauguUgcucagaugg..... | 35    | 1 | seq |
| .....gggggauauagcucagaugg..... | 31    | 1 | seq |
| .....gggggaugGagcucagaugg..... | 6     | 1 | seq |
| .....gggggauguagAcagaugg.....  | 33    | 1 | seq |
| .....gggggauguagcuAagaugg..... | 8     | 1 | seq |
| .....Cgggauguagcucagaugg.....  | 21    | 1 | seq |
| .....gCgggauguagcucagaugg..... | 4     | 1 | seq |

## Mature

## Star

|                    |                        |                      |                        |                |                    |       |   |     |
|--------------------|------------------------|----------------------|------------------------|----------------|--------------------|-------|---|-----|
| uuuauucucaauagguua | ggggauguagcucagau      | gugaagcacucgcuuagcug | uguguguuagacuugugacuug | acucauagagagau | gagauuggcacuuacgcu |       |   |     |
| .....              | .ggggauguagcucagaA     | gg                   |                        |                |                    | 19    | 1 | seq |
| .....              | .ggggauguagcCcagaug    |                      |                        |                |                    | 173   | 1 | seq |
| .....              | .ggggauguagcucagauU    | g                    |                        |                |                    | 92    | 1 | seq |
| .....              | .ggggUuguagcucagaug    |                      |                        |                |                    | 14    | 1 | seq |
| .....              | .ggggCuuguagcucagaug   |                      |                        |                |                    | 7     | 1 | seq |
| .....              | .gggAauguagcucagaug    |                      |                        |                |                    | 24    | 1 | seq |
| .....              | .Ugggauguagcucagaug    |                      |                        |                |                    | 57    | 1 | seq |
| .....              | .ggggGguagcucagaug     |                      |                        |                |                    | 11    | 1 | seq |
| .....              | .gUgggauguagcucagaug   |                      |                        |                |                    | 23    | 1 | seq |
| .....              | .Aggggauguagcucagaug   |                      |                        |                |                    | 112   | 1 | seq |
| .....              | .Nggggauguagcucagaug   |                      |                        |                |                    | 73    | 1 | seq |
| .....              | .gggggauguagcucGgaug   |                      |                        |                |                    | 219   | 1 | seq |
| .....              | .gggggauguagcGcagaug   |                      |                        |                |                    | 2     | 1 | seq |
| .....              | .ggggGcuagcucagaug     |                      |                        |                |                    | 140   | 1 | seq |
| .....              | .gggggauguCgcucagaug   |                      |                        |                |                    | 9     | 1 | seq |
| .....              | .gggggaugAagcucagaug   |                      |                        |                |                    | 21    | 1 | seq |
| .....              | .gggggauguUgcucagaug   | gu                   |                        |                |                    | 21    | 1 | seq |
| .....              | .gggggauguagcucagUug   | gu                   |                        |                |                    | 8     | 1 | seq |
| .....              | .gggggauguagcucagaugU  |                      |                        |                |                    | 20    | 1 | seq |
| .....              | .gggggauguagcucagaCg   | gu                   |                        |                |                    | 87    | 1 | seq |
| .....              | .gggggauguagcucagaugCu |                      |                        |                |                    | 48    | 1 | seq |
| .....              | .ggggGguagcucagaug     | gu                   |                        |                |                    | 6     | 1 | seq |
| .....              | .gggggauguagcucagauU   | gu                   |                        |                |                    | 14    | 1 | seq |
| .....              | .gggggauguCgcucagaug   | gu                   |                        |                |                    | 2     | 1 | seq |
| .....              | .gggggauguagcucCgaug   | gu                   |                        |                |                    | 11    | 1 | seq |
| .....              | .ggggGcuagcucagaug     | gu                   |                        |                |                    | 91    | 1 | seq |
| .....              | .gggggauguagcCcagaug   | gu                   |                        |                |                    | 84    | 1 | seq |
| .....              | .gggggauguagcucUgaug   | gu                   |                        |                |                    | 12    | 1 | seq |
| .....              | .ggCgauguagcucagaug    | gu                   |                        |                |                    | 5     | 1 | seq |
| .....              | .gCgggauguagcucagaug   | gu                   |                        |                |                    | 5     | 1 | seq |
| .....              | .gggggauguagcGcagaug   | gu                   |                        |                |                    | 2     | 1 | seq |
| .....              | .gggUauguagcucagaug    | gu                   |                        |                |                    | 13    | 1 | seq |
| .....              | .gggggaugCagcucagaug   | gu                   |                        |                |                    | 63    | 1 | seq |
| .....              | .gggggauguagAucagaug   | gu                   |                        |                |                    | 11    | 1 | seq |
| .....              | .gggggauguagcucGgaug   | gu                   |                        |                |                    | 95    | 1 | seq |
| .....              | .gggggauguagcucagGug   | gu                   |                        |                |                    | 112   | 1 | seq |
| .....              | .gggggauguNgcucagaug   | gu                   |                        |                |                    | 1     | 1 | seq |
| .....              | .ggggGAguaucucagaug    | gu                   |                        |                |                    | 4     | 1 | seq |
| .....              | .gggggauguagcucagaug   | gu                   |                        |                |                    | 33358 | 0 | seq |
| .....              | .gggggauguagcuGagaug   | gu                   |                        |                |                    | 5     | 1 | seq |
| .....              | .gggggauAuaucucagaug   | gu                   |                        |                |                    | 18    | 1 | seq |
| .....              | .Aggggauguagcucagaug   | gu                   |                        |                |                    | 64    | 1 | seq |
| .....              | .gUgggauguagcucagaug   | gu                   |                        |                |                    | 12    | 1 | seq |
| .....              | .gggggaugAagcucagaug   | gu                   |                        |                |                    | 7     | 1 | seq |
| .....              | .gggggauCuaucucagaug   | gu                   |                        |                |                    | 1     | 1 | seq |
| .....              | .gggggauguagcucagaA    | gg                   |                        |                |                    | 7     | 1 | seq |
| .....              | .gggAauguagcucagaug    | gu                   |                        |                |                    | 14    | 1 | seq |
| .....              | .gggggauguGgcucagaug   | gu                   |                        |                |                    | 88    | 1 | seq |
| .....              | .gggggauguagcucagaug   | N                    |                        |                |                    | 1     | 1 | seq |
| .....              | .gggggauguagcAcagaug   | gu                   |                        |                |                    | 17    | 1 | seq |
| .....              | .gggggauguagUucagaug   | gu                   |                        |                |                    | 41    | 1 | seq |
| .....              | .gggggaugGagcucagaug   | gu                   |                        |                |                    | 3     | 1 | seq |
| .....              | .gggggauguaCucagaug    | gu                   |                        |                |                    | 3     | 1 | seq |
| .....              | .ggggUuguagcucagaug    | gu                   |                        |                |                    | 15    | 1 | seq |
| .....              | .Ugggauguagcucagaug    | gu                   |                        |                |                    | 36    | 1 | seq |
| .....              | .ggggCuuguagcucagaug   | gu                   |                        |                |                    | 9     | 1 | seq |
| .....              | .Cgggauguagcucagaug    | gu                   |                        |                |                    | 10    | 1 | seq |
| .....              | .gggggauguagcucagaug   | G                    |                        |                |                    | 1127  | 1 | seq |
| .....              | .gggggauguagcucagaug   | C                    |                        |                |                    | 5647  | 1 | seq |
| .....              | .Nggggauguagcucagaug   | gu                   |                        |                |                    | 41    | 1 | seq |
| .....              | .gggggauguagcuAagaug   | gu                   |                        |                |                    | 10    | 1 | seq |
| .....              | .gggggauguagcucagaug   | gug                  |                        |                |                    | 252   | 0 | seq |
| .....              | .gAggauguagcucagaug    | gug                  |                        |                |                    | 1     | 1 | seq |
| .....              | .gggggauguagcucagaug   | C                    |                        |                |                    | 18    | 1 | seq |
| .....              | .gggggauguagcucagaug   | Aug                  |                        |                |                    | 1     | 1 | seq |
| .....              | .gggggauguagcucagaug   | Gg                   |                        |                |                    | 1     | 1 | seq |
| .....              | .gggggauguagcucagaug   | Cg                   |                        |                |                    | 11    | 1 | seq |
| .....              | .Cgggauguagcucagaug    | gug                  |                        |                |                    | 1     | 1 | seq |
| .....              | .gggggauguagcucaga     | Cggug                |                        |                |                    | 2     | 1 | seq |
| .....              | .ggggGuguagcucagaug    | gug                  |                        |                |                    | 2     | 1 | seq |

## Mature

## Star

|                                                                                                               |      |   |     |
|---------------------------------------------------------------------------------------------------------------|------|---|-----|
| uuuauucucaauaggguuaggggauguagcucagauaggugaagcacucgcuuagcuguguguguuagacuugugacuugacucauagagagagauaggcacuuacgcu |      |   |     |
| .....ggggauguagcucGgauggug.....                                                                               | 1    | 1 | seq |
| .....Aggggauguagcucagauaggug.....                                                                             | 1    | 1 | seq |
| .....ggggauguagcucacAauggug.....                                                                              | 2    | 1 | seq |
| .....ggggauguGgcucagauaggug.....                                                                              | 1    | 1 | seq |
| .....ggggauguagcucUauggug.....                                                                                | 35   | 1 | seq |
| .....ggggauguagcucCauggug.....                                                                                | 72   | 1 | seq |
| .....ggggauguagcucagauaggugG.....                                                                             | 16   | 1 | seq |
| .....ggggauguagcucCaugguga.....                                                                               | 1    | 1 | seq |
| .....ggggauguagcucagauagguga.....                                                                             | 3    | 0 | seq |
| .....ggggauguagcucagauaggugC.....                                                                             | 1    | 1 | seq |
| .....ggggauguagcucagauaggCga.....                                                                             | 1    | 1 | seq |
| .....ggggauguagcucagauaggGga.....                                                                             | 1    | 1 | seq |
| .....ggggauguagcucagauaggugGa.....                                                                            | 10   | 1 | seq |
| .....ggggauguagcucagauaggugGag.....                                                                           | 4    | 1 | seq |
| .....ggggauguagcucagauaggguAaagc.....                                                                         | 3    | 1 | seq |
| .....ggggauguagcucagauaggugGagc.....                                                                          | 12   | 1 | seq |
| .....ggggauguagcucagauaggugGagca.....                                                                         | 2    | 1 | seq |
| .....ggggauguagcucagauaggugGagcacucgcuu.....                                                                  | 7    | 1 | seq |
| .....gggauguagcucagau.....                                                                                    | 4782 | 0 | seq |
| .....Ugggauguagcucagau.....                                                                                   | 4    | 1 | seq |
| .....gggauguagcCcagau.....                                                                                    | 7    | 1 | seq |
| .....gggauguGgcucagau.....                                                                                    | 1    | 1 | seq |
| .....gggauguagcucagauU.....                                                                                   | 22   | 1 | seq |
| .....gggauguGgcucagau.....                                                                                    | 8    | 1 | seq |
| .....gggCuguagcucagau.....                                                                                    | 1    | 1 | seq |
| .....gggaAguagcucagau.....                                                                                    | 1    | 1 | seq |
| .....gggauguagcGcagau.....                                                                                    | 1    | 1 | seq |
| .....gggauguagcucagaAg.....                                                                                   | 7    | 1 | seq |
| .....gggauguagUucagau.....                                                                                    | 4    | 1 | seq |
| .....gggaUAuagcucagau.....                                                                                    | 7    | 1 | seq |
| .....gggauguagcuAagau.....                                                                                    | 1    | 1 | seq |
| .....gggauguagcucagaCg.....                                                                                   | 43   | 1 | seq |
| .....gggauguacCucagau.....                                                                                    | 1    | 1 | seq |
| .....gggauguagcucagGug.....                                                                                   | 31   | 1 | seq |
| .....gggUuguagcucagau.....                                                                                    | 2    | 1 | seq |
| .....gggauguagcAcagau.....                                                                                    | 5    | 1 | seq |
| .....gggauguagcucagUug.....                                                                                   | 1    | 1 | seq |
| .....gggauCuagcucagau.....                                                                                    | 1    | 1 | seq |
| .....Cggauguagcucagau.....                                                                                    | 1    | 1 | seq |
| .....Nggauguagcucagau.....                                                                                    | 4    | 1 | seq |
| .....gggauguagcucUgaug.....                                                                                   | 6    | 1 | seq |
| .....gggaGguagcucagau.....                                                                                    | 1    | 1 | seq |
| .....ggAauguagcucagau.....                                                                                    | 2    | 1 | seq |
| .....gggauguUgcucagau.....                                                                                    | 4    | 1 | seq |
| .....gggauguagcucGgaugg.....                                                                                  | 7    | 1 | seq |
| .....gggauguagcucagaAgg.....                                                                                  | 1    | 1 | seq |
| .....gggauguagcucagGugg.....                                                                                  | 12   | 1 | seq |
| .....gggauguagUucagauagg.....                                                                                 | 3    | 1 | seq |
| .....gggauguagcucagauagg.....                                                                                 | 2647 | 0 | seq |
| .....gggauguagcucUgaugg.....                                                                                  | 4    | 1 | seq |
| .....gggauguacCucagauagg.....                                                                                 | 1    | 1 | seq |
| .....gggauguagcucagUugg.....                                                                                  | 2    | 1 | seq |
| .....gggauguagcCcagauagg.....                                                                                 | 8    | 1 | seq |
| .....gggCuguagcucagauagg.....                                                                                 | 1    | 1 | seq |
| .....gggaGguagcucagauagg.....                                                                                 | 1    | 1 | seq |
| .....ggAauguagcucagauagg.....                                                                                 | 3    | 1 | seq |
| .....gggUuguagcucagauagg.....                                                                                 | 1    | 1 | seq |
| .....gggaugAagcucagauagg.....                                                                                 | 1    | 1 | seq |
| .....Ugggauguagcucagauagg.....                                                                                | 4    | 1 | seq |
| .....gggauguUgcucagauagg.....                                                                                 | 2    | 1 | seq |
| .....ggUauguagcucagauagg.....                                                                                 | 1    | 1 | seq |
| .....gggaCguagcucagauagg.....                                                                                 | 12   | 1 | seq |
| .....Nggauguagcucagauagg.....                                                                                 | 5    | 1 | seq |
| .....gggauguagcucagauG.....                                                                                   | 25   | 1 | seq |
| .....gggauguGgcucagauagg.....                                                                                 | 7    | 1 | seq |
| .....gggauguagcucagaCgg.....                                                                                  | 15   | 1 | seq |
| .....gggauguagcucagauUg.....                                                                                  | 8    | 1 | seq |
| .....gggauguagcAcagauagg.....                                                                                 | 1    | 1 | seq |
| .....gggauguagcCcagauagg.....                                                                                 | 3    | 1 | seq |
| .....Nggauguagcucagauagg.....                                                                                 | 1    | 1 | seq |

## Mature

## Star

|                                                                                                                    |      |   |     |
|--------------------------------------------------------------------------------------------------------------------|------|---|-----|
| uuuauucuacucaaaggguagggauguaagcucagaggaugugaagcacucgcuuagcuguguguguugacuugugacuuagacucacauagagagagauugggcacuuacgcu |      |   |     |
| .....gggauguaagcucagaggC.....                                                                                      | 224  | 1 | seq |
| .....gggauuagcucagagggu.....                                                                                       | 1    | 1 | seq |
| .....gggauguaagcucagagggu.....                                                                                     | 1399 | 0 | seq |
| .....ggUauguaagcucagagggu.....                                                                                     | 1    | 1 | seq |
| .....gggauguaagcucagagCgggu.....                                                                                   | 4    | 1 | seq |
| .....gggauguaagcucagaggG.....                                                                                      | 52   | 1 | seq |
| .....gggauguaagcGcagagggu.....                                                                                     | 1    | 1 | seq |
| .....gggauguaagUucagagggu.....                                                                                     | 1    | 1 | seq |
| .....Uggauuguaagcucagagggu.....                                                                                    | 1    | 1 | seq |
| .....gggauguaagcucagUugggu.....                                                                                    | 1    | 1 | seq |
| .....gggauguaagcucagGugggu.....                                                                                    | 5    | 1 | seq |
| .....gggaugugGgcucagagggu.....                                                                                     | 2    | 1 | seq |
| .....gggauguaagcucagaggCu.....                                                                                     | 3    | 1 | seq |
| .....gggauguaagcucagaggUu.....                                                                                     | 2    | 1 | seq |
| .....gggauguaagcucaCaugggug.....                                                                                   | 2    | 1 | seq |
| .....gggauguaagcucaUaugggug.....                                                                                   | 4    | 1 | seq |
| .....gggauguaagcucagaggUug.....                                                                                    | 1    | 1 | seq |
| .....gggauguaagcucagaggGg.....                                                                                     | 3    | 1 | seq |
| .....gggauguaagcucagagggu.....                                                                                     | 19   | 0 | seq |
| .....gggauguaagcucagagggu.....                                                                                     | 29   | 0 | seq |
| .....Cgauguaagcucagagg.....                                                                                        | 1    | 1 | seq |
| .....ggauuguaagcucagaggC.....                                                                                      | 6    | 1 | seq |
| .....ggauuguaagcucagagggu.....                                                                                     | 33   | 0 | seq |
| .....ggauuguaagcucagagggu.....                                                                                     | 1    | 0 | seq |
| .....ggauuguaagcucagaggguG.....                                                                                    | 1    | 1 | seq |
| .....gauguaagcucagagggu.....                                                                                       | 921  | 0 | seq |
| .....gauguaagcAacagagggu.....                                                                                      | 1    | 1 | seq |
| .....gauguaagcucagaggC.....                                                                                        | 167  | 1 | seq |
| .....gauguaagcucagaggCu.....                                                                                       | 1    | 1 | seq |
| .....gauguaagcucagagggu.....                                                                                       | 1    | 1 | seq |
| .....gaugGagcucagagggu.....                                                                                        | 1    | 1 | seq |
| .....gauguaagcucUgagggu.....                                                                                       | 1    | 1 | seq |
| .....Cauguaagcucagagggu.....                                                                                       | 2    | 1 | seq |
| .....gaCguagcucagagggu.....                                                                                        | 1    | 1 | seq |
| .....gaugugGgcucagagggu.....                                                                                       | 1    | 1 | seq |
| .....gauguaagcucagaggG.....                                                                                        | 35   | 1 | seq |
| .....gauguaagcucCgauggu.....                                                                                       | 1    | 1 | seq |
| .....Nauguaagcucagagggu.....                                                                                       | 1    | 1 | seq |
| .....gaGguagcucagagggu.....                                                                                        | 1    | 1 | seq |
| .....gauguaagcucGgauggu.....                                                                                       | 2    | 1 | seq |
| .....gauguaagcCcagagggu.....                                                                                       | 1    | 1 | seq |
| .....gauguaagUucagagggu.....                                                                                       | 2    | 1 | seq |
| .....Uauguaagcucagagggu.....                                                                                       | 1    | 1 | seq |
| .....gaugCagcucagagggu.....                                                                                        | 3    | 1 | seq |
| .....gaAguagcucagagggu.....                                                                                        | 1    | 1 | seq |
| .....gauguaagcucagagCgggu.....                                                                                     | 2    | 1 | seq |
| .....gaugugGgcucagagggu.....                                                                                       | 1    | 1 | seq |
| .....gauguaagcucaUaugggug.....                                                                                     | 2    | 1 | seq |
| .....gauguaagcucaCaugggug.....                                                                                     | 3    | 1 | seq |
| .....gauguaagcucagagggu.....                                                                                       | 9    | 0 | seq |
| .....gauguaagcucagaggguG.....                                                                                      | 1    | 1 | seq |
| .....auguaagcucagaggUug.....                                                                                       | 1    | 1 | seq |
| .....auguaagcucagagggu.....                                                                                        | 2    | 0 | seq |
| .....uguagcucagaggguG.....                                                                                         | 1    | 1 | seq |
| .....uguagcucagaggguGag.....                                                                                       | 1    | 1 | seq |
| .....uguagcucagaggguGagcacucgcuu.....                                                                              | 1    | 1 | seq |
| .....gcugugugCuguaagacuu.....                                                                                      | 1    | 1 | seq |
| .....agagagaugagauugUc.....                                                                                        | 1    | 1 | seq |

Provisional ID : MA\_9074444\_37850  
 Score total : 318986.7  
 Score for star read(s) : 3.9  
 Score for read counts : 318985  
 Score for mfe : 0.1  
 Score for randfold : -2.2  
 Score for cons. seed :  
 Total read count : 625687  
 Mature read count : 625216  
 Loop read count : 0  
 Star read count : 471

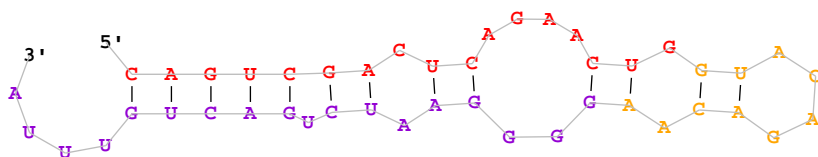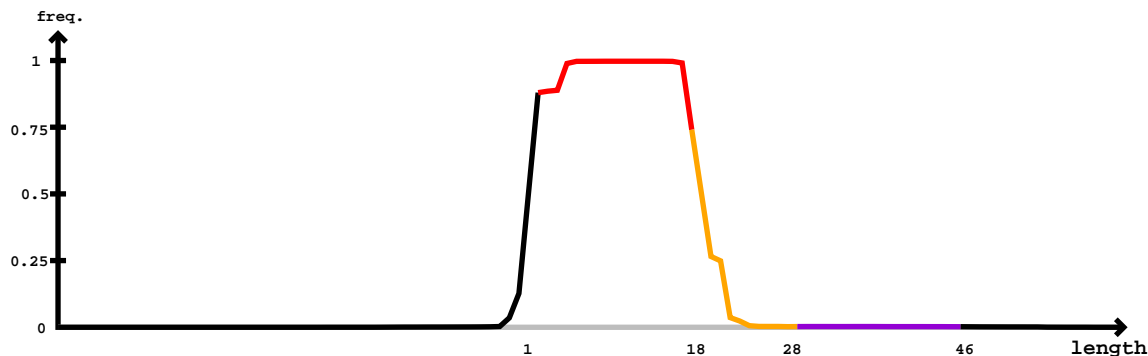

## Mature Star

| 5' -                                             | obs | exp | reads | mm | sample |
|--------------------------------------------------|-----|-----|-------|----|--------|
| uauggacguagaauuguccucugugggggaauuuuccuagggcgugaa | 3'  |     |       |    |        |
| uauggacguagaauuguccucugugggggaauuuuccuagggcgugaa |     |     |       |    |        |
| uauggGcguagaauuguccu.....                        |     |     | 1     | 1  | seq    |
| uauggGcguagaauuguccu.....                        |     |     | 1     | 1  | seq    |
| uauggGcguagaauuguccu.....                        |     |     | 2     | 1  | seq    |
| uauggGcguagaauuguccu.....                        |     |     | 1     | 1  | seq    |
| uauggGcguagaauuguccu.....                        |     |     | 1     | 1  | seq    |
| uauggGcguagaauuguccu.....                        |     |     | 1     | 1  | seq    |
| uauggGcguagaauuguccu.....                        |     |     | 3     | 1  | seq    |
| uauggGcguagaauuguccu.....                        |     |     | 1     | 1  | seq    |
| uauggGcguagaauuguccu.....                        |     |     | 1     | 1  | seq    |
| uauggGcguagaauuguccu.....                        |     |     | 41    | 1  | seq    |
| uauggGcguagaauuguccu.....                        |     |     | 4     | 1  | seq    |
| uauggGcguagaauuguccu.....                        |     |     | 2     | 1  | seq    |
| uauggGcguagaauuguccu.....                        |     |     | 1     | 1  | seq    |
| uauggGcguagaauuguccu.....                        |     |     | 2     | 1  | seq    |
| uauggGcguagaauuguccu.....                        |     |     | 1     | 1  | seq    |
| uauggGcguagaauuguccu.....                        |     |     | 2     | 0  | seq    |
| uauggGcguagaauuguccu.....                        |     |     | 6     | 0  | seq    |
| uauggGcguagaauuguccu.....                        |     |     | 1     | 0  | seq    |
| uauggGcguagaauuguccu.....                        |     |     | 2     | 0  | seq    |
| uauggGcguagaauuguccu.....                        |     |     | 1     | 0  | seq    |
| uauggGcguagaauuguccu.....                        |     |     | 2     | 0  | seq    |
| uauggGcguagaauuguccu.....                        |     |     | 1     | 1  | seq    |
| uauggGcguagaauuguccu.....                        |     |     | 1     | 1  | seq    |
| uauggGcguagaauuguccu.....                        |     |     | 1     | 0  | seq    |
| uauggGcguagaauuguccu.....                        |     |     | 1     | 0  | seq    |
| uauggGcguagaauuguccu.....                        |     |     | 3     | 0  | seq    |
| uauggGcguagaauuguccu.....                        |     |     | 1     | 1  | seq    |
| uauggGcguagaauuguccu.....                        |     |     | 1     | 1  | seq    |
| uauggGcguagaauuguccu.....                        |     |     | 1     | 1  | seq    |
| uauggGcguagaauuguccu.....                        |     |     | 1     | 1  | seq    |
| uauggGcguagaauuguccu.....                        |     |     | 2     | 0  | seq    |
| uauggGcguagaauuguccu.....                        |     |     | 2     | 1  | seq    |



## Star

|                                                        |    |   |     |
|--------------------------------------------------------|----|---|-----|
| ..uucccuagggcggugaacagucgacucagaacugg..                | 1  | 0 | seq |
| ..uucccuagggcggugaacagucgacucagaacuggu..               | 1  | 0 | seq |
| ..uucccuagggcggugaacagucgacucagaacuggua..              | 22 | 0 | seq |
| ..uucccuagggcggugaacagucgacucagaacugggCa..             | 1  | 1 | seq |
| ..uucAcuagggcggugaacagucgacucagaacuggua..              | 1  | 1 | seq |
| ..uucccuagggcggGgaacagucgacucagaacuggua..              | 1  | 1 | seq |
| ..uucccuagggcggAgaacagucgacucagaacuggua..              | 6  | 1 | seq |
| ..uucccuagggcggGgaacagucgacucagaacugguaca..            | 39 | 1 | seq |
| ..uucccuagggcggCgaacagucgacucagaacugguacag..           | 3  | 1 | seq |
| ..uucccuagggcggGgaacagucgacucagaacugguacaga..          | 2  | 1 | seq |
| ..uucccuagggcggugaacagucgacucagaacugguacGgac..         | 1  | 1 | seq |
| ..uucccuagggcggugaacagucgacucagaacugguacGgaca..        | 1  | 1 | seq |
| ..uucccuagggcggGgaacagucgacucagaacugguacagaca..        | 2  | 1 | seq |
| ..uucccuagggcggGgaacagucgacucagaacugguacagacaagggg..   | 1  | 1 | seq |
| ..uucccuagggcggugaacagucgacucagaacugguacGgacaaggggaa.. | 4  | 1 | seq |
| ..uucccuagggcggGgaacagucgacucagaacugguacagacaaggggaa.. | 4  | 1 | seq |
| ..ucccuagggcggugaaca..                                 | 1  | 0 | seq |
| ..ucccuagggcggugaaacagC..                              | 1  | 1 | seq |
| ..ucccuagggcggugaaacagu..                              | 1  | 0 | seq |
| ..ucccuagggcggugaaacaguc..                             | 1  | 0 | seq |
| ..ucccuagggcggugaaacagucgac..                          | 1  | 0 | seq |
| ..ucccuagggcggugaaacagucgac..                          | 2  | 0 | seq |
| ..ucccuagggcggAgaacagucgacuc..                         | 1  | 1 | seq |
| ..ucccuagggcggugaaacagucgacuc..                        | 2  | 0 | seq |
| ..ucccuagggcggugaaacagucgacucaga..                     | 3  | 0 | seq |
| ..ucccuagggcggugaacagucgacucagaac..                    | 2  | 0 | seq |
| ..ucccuagggcggugaacagucgacucagaac..                    | 15 | 0 | seq |
| ..ucccuagggcggAgaacagucgacucagaacug..                  | 2  | 1 | seq |
| ..ucccuagggcggugaacagucgacucagaacug..                  | 7  | 0 | seq |
| ..ucccuagggcggugaacagucgacucagaacugA..                 | 1  | 1 | seq |
| ..ucccuagggcggugaacagucgacucagaacugg..                 | 1  | 0 | seq |
| ..ucccuagggcggugaacagucgacucagaacuggu..                | 2  | 0 | seq |
| ..ucccuGggcggugaacagucgacucagaacuggua..                | 1  | 1 | seq |
| ..ucccuagggcggugaacagucgGcucagaacuggua..               | 1  | 1 | seq |
| ..ucccuagggcggAgaacagucgacucagaacuggua..               | 2  | 1 | seq |
| ..ucccuagggcggugaacagucgacucagaacuggGa..               | 1  | 1 | seq |
| ..Ncccuagggcggugaacagucgacucagaacuggua..               | 1  | 1 | seq |
| ..ucccuagggcggGgaacagucgacucagaacuggua..               | 2  | 1 | seq |
| ..ucccuagggcggugaacagucgacucagaacuggua..               | 18 | 0 | seq |
| ..ucccuagggcggugaacagucgacucagaacugguG..               | 1  | 1 | seq |
| ..ucccuagggcggGgaacagucgacucagaacugguaca..             | 47 | 1 | seq |
| ..ucccuagggcggugaacagucgacucagaacugguacGg..            | 7  | 1 | seq |
| ..ucccuagggcggGgaacagucgacucagaacugguacag..            | 14 | 1 | seq |
| ..ucccuagggcggGgaacagucgacucagaacugguacaga..           | 1  | 1 | seq |
| ..ucccuagggcggGgaacagucgacucagaacugguacagac..          | 1  | 1 | seq |
| ..ucccuagggcggGgaacagucgacucagaacugguacagaca..         | 8  | 1 | seq |
| ..ucccuagggcggugaacagucgacucagaacugguacGgaca..         | 2  | 1 | seq |
| ..ucccuagggcggugaacagucgacucagaacugguacGgacaa..        | 1  | 1 | seq |
| ..ucccuagggcggGgaacagucgacucagaacugguacagacaa..        | 1  | 1 | seq |
| ..ucccuagggcggGgaacagucgacucagaacugguacagacaaag..      | 1  | 1 | seq |
| ..ucccuagggcggGgaacagucgacucagaacugguacagacaaaggggaa.. | 5  | 1 | seq |
| ..ucccuagggcggugaacagucgacucagaacugguacGgacaaggggaa..  | 3  | 1 | seq |
| ..Nccuagggcggugaacaguc..                               | 1  | 1 | seq |
| ..cccuagggcggugaacagucg..                              | 1  | 0 | seq |
| ..cccuagggcggAgaacagucg..                              | 1  | 1 | seq |
| ..cccuagggcggugaacagucg..                              | 1  | 0 | seq |
| ..cccuagggcggugaacagucgac..                            | 2  | 0 | seq |
| ..cccuagggcggGgaacagucgac..                            | 1  | 1 | seq |
| ..cccuagggcggugaacagucgac..                            | 1  | 0 | seq |
| ..cccuagggcggugaacagucgacucagaac..                     | 1  | 0 | seq |
| ..cccuagggcggGgaacagucgacucagaac..                     | 1  | 1 | seq |
| ..cccuGggcggugaacagucgacucagaacu..                     | 1  | 1 | seq |
| ..cccuagggcggugaacagucgacucagaacA..                    | 1  | 1 | seq |
| ..cccuagggcggugaacagucgacucagaacC..                    | 1  | 1 | seq |
| ..cccuagggcggugaacagucgacucagaacu..                    | 7  | 0 | seq |
| ..cccuagggcggugaacagucgacucagaacug..                   | 17 | 0 | seq |
| ..cccuagggcggugaacagucgacucagaacAg..                   | 1  | 1 | seq |
| ..cccuagggcggGgaacagucgacucagaacug..                   | 7  | 1 | seq |
| ..cccuagggcggugaacagucgacucagaacuA..                   | 1  | 1 | seq |
| ..cccuagggcggAgaacagucgacucagaacug..                   | 3  | 1 | seq |
| ..cccuagggcggugaacagucgacucagaacugg..                  | 1  | 0 | seq |

## Mature

## Star

uauaggacguagaauuccucucgugggggaauuuuccuaggcgguagaacagucgacucgagaacugguacagacaaggggaaucugacuguuaauuaaacaagaaauu

|                                                              |    |   |     |
|--------------------------------------------------------------|----|---|-----|
| .....cccuaggcggAgaacagucgacucagaacugg.....                   | 2  | 1 | seq |
| .....cccuaggcgggugaacagucgacucagGacuggua.....                | 1  | 1 | seq |
| .....cccuaggcggGgaacagucgacucagaacuggua.....                 | 3  | 1 | seq |
| .....cccuaggcgggugaacagucgacucagaacuggua.....                | 15 | 0 | seq |
| .....cccuaggcgggugaacagucgacucagaacugguacG.....              | 1  | 1 | seq |
| .....cccuaggcggGgaacagucgacucagaacugguacGg.....              | 17 | 1 | seq |
| .....cccuaggcgggugaacagucgacucagaacugguacGg.....             | 1  | 1 | seq |
| .....cccuaggcggGgaacagucgacucagaacugguacag.....              | 14 | 1 | seq |
| .....cccuaggcggGgaacagucgacucagaacugguacagac.....            | 3  | 1 | seq |
| .....cccuaggcgggugaacagucgacucagaacugguacGgaca.....          | 4  | 1 | seq |
| .....cccuaggcggGgaacagucgacucagaacugguacagaca.....           | 7  | 1 | seq |
| .....cccuaggcggGgaacagucgacucagaacugguacagacaa.....          | 1  | 1 | seq |
| .....cccuaggcggGgaacagucgacucagaacugguacagacaagggg.....      | 1  | 1 | seq |
| .....cccuaggcgggugaacagucgacucagaacugguacGgacaaggggaa.....   | 1  | 1 | seq |
| .....cccuaggcggGgaacagucgacucagaacugguacagacaaggggaa.....    | 1  | 1 | seq |
| .....cccuaggcgggugaacagucgacucagaacugguacGgacaaggggaauc..... | 1  | 1 | seq |
| .....ccuaggcggAgaacagu.....                                  | 1  | 1 | seq |
| .....ccuaggcgggugaacaguc.....                                | 1  | 0 | seq |
| .....ccuaggcgggugaacagucgaU.....                             | 1  | 1 | seq |
| .....ccuaggcgggugaacagucgacucagaacug.....                    | 2  | 0 | seq |
| .....ccuaggcggAgaacagucgacucagaacug.....                     | 2  | 1 | seq |
| .....ccuaggcgggugaacagucgacucagaacuggua.....                 | 1  | 0 | seq |
| .....ccuaggcggGgaacagucgacucagaacuggua.....                  | 1  | 1 | seq |
| .....ccuaggcggGgaacagucgacucagaacugguacGg.....               | 12 | 1 | seq |
| .....ccuaggcgggugaacagucgacucagaacugguacGg.....              | 2  | 1 | seq |
| .....ccuaggcggGgaacagucgacucagaacugguacag.....               | 4  | 1 | seq |
| .....ccuaggcgggugaacagucgacucagaacugguacGgac.....            | 1  | 1 | seq |
| .....ccuaggcgggugaacagucgacucagaacugguacGgacaag.....         | 1  | 1 | seq |
| .....cuaggcgggugaacagucgac.....                              | 1  | 0 | seq |
| .....cuaggcgggugaacagucgacucagaacug.....                     | 2  | 0 | seq |
| .....cuaggcgggugaacagucgacucagaacua.....                     | 2  | 1 | seq |
| .....cuaggcgggugaacagucgacucagaacugguacG.....                | 4  | 1 | seq |
| .....cuaggcggGgaacagucgacucagaacugguacGg.....                | 16 | 1 | seq |
| .....cuaggcgggugaacagucgacucagaacugguacGg.....               | 1  | 1 | seq |
| .....cuaggcggGgaacagucgacucagaacugguacag.....                | 1  | 1 | seq |
| .....cuaggcgggugaacagucgacucagaacugguacGga.....              | 1  | 1 | seq |
| .....uaggcgggugaacagucgacuc.....                             | 1  | 0 | seq |
| .....uaggcgggugaacagucgacucag.....                           | 1  | 0 | seq |
| .....uaggcgggugaacagucgacucaga.....                          | 1  | 0 | seq |
| .....uaggcgggugaacagucgacucagaacua.....                      | 1  | 1 | seq |
| .....uaggcgggugaacagucgacucagaacug.....                      | 2  | 0 | seq |
| .....uaggcgggugaacagucgacucagaGcug.....                      | 1  | 1 | seq |
| .....uaggcgggugaacagucgacucagaacuggua.....                   | 1  | 0 | seq |
| .....uaggcgggugaacagucgacucagaacugguac.....                  | 3  | 0 | seq |
| .....uaggcggGgaacagucgacucagaacugguacGg.....                 | 37 | 1 | seq |
| .....uaggcggGgaacagucgacucagaacugguacag.....                 | 3  | 1 | seq |
| .....uaggcgggugaacagucgacucagaacugguacGgac.....              | 1  | 1 | seq |
| .....uaggcgggugaacagucgacucagaacugguacGgacaa.....            | 1  | 1 | seq |
| .....aggcgggugaacagucgacuc.....                              | 1  | 0 | seq |
| .....aggcgggugaacagucgacucagaac.....                         | 1  | 0 | seq |
| .....aggcgggugaacagucgacucagaacug.....                       | 4  | 0 | seq |
| .....aggcgggugaacagucgacucagaacAg.....                       | 1  | 1 | seq |
| .....aggcgggugaacagucgacucagaacuggua.....                    | 2  | 0 | seq |
| .....aggcggGgaacagucgacucagaacugguacGg.....                  | 27 | 1 | seq |
| .....aggcgggugaacagucgacucagaacugguacG.....                  | 1  | 1 | seq |
| .....aggcggGgaacagucgacucagaacugguacag.....                  | 1  | 1 | seq |
| .....aggcggGgaacagucgacucagaacugguacagaca.....               | 2  | 1 | seq |
| .....aggcgggugaacagucgacucagaacugguacGgaca.....              | 1  | 1 | seq |
| .....ggcggAgaacagucgacucagaacug.....                         | 1  | 1 | seq |
| .....ggcgggugaacagucgacucagaacug.....                        | 1  | 0 | seq |
| .....ggcgggugaacGgucgacucagaacuggu.....                      | 1  | 1 | seq |
| .....ggcgggugaacagucgacucagaacuggu.....                      | 2  | 0 | seq |
| .....ggcggGgaacagucgacucagaacugguacGg.....                   | 26 | 1 | seq |
| .....ggcgggugaacagucgacucagaacugguacGg.....                  | 2  | 1 | seq |
| .....ggcgggugaacagucgacucagaacugguacGgaca.....               | 2  | 1 | seq |
| .....gcgggugaacagucgUcucagaac.....                           | 1  | 1 | seq |
| .....gcggAgaacagucgacucagaacug.....                          | 2  | 1 | seq |
| .....gcgggugaacagucgacucagaacugg.....                        | 1  | 0 | seq |
| .....gcgggugaacagucgacucagaacuggua.....                      | 1  | 0 | seq |
| .....gcggGgaacagucgacucagaacugguacGg.....                    | 43 | 1 | seq |

Star

|                                           |     |   |     |
|-------------------------------------------|-----|---|-----|
| gcggCGaacagucgacucagaacugguacag           | 2   | 1 | seq |
| gcggugaacagucgacucagaacugguacGga          | 1   | 1 | seq |
| gcggCGaacagucgacucagaacugguacagac         | 1   | 1 | seq |
| gcggugaacagucgacucagaacugguacGgaca        | 1   | 1 | seq |
| gcggCGaacagucgacucagaacugguacagaca        | 1   | 1 | seq |
| gcggCGaacagucgacucagaacugguacagacaag      | 1   | 1 | seq |
| cggugaacagucgacuc                         | 1   | 0 | seq |
| cggugaacagucgacucaga                      | 1   | 0 | seq |
| Gggugaacagucgacucagaacu                   | 1   | 1 | seq |
| cggAgaacagucgacucagaacug                  | 1   | 1 | seq |
| cggugaacagucgacucagaacuA                  | 1   | 1 | seq |
| cggugaacagucgacucagaacug                  | 4   | 0 | seq |
| cggugaacagucgacucagaacugg                 | 1   | 0 | seq |
| cggugaacagucgacucagaacuggua               | 1   | 0 | seq |
| cggugaacagucgacucagaacugguacG             | 3   | 1 | seq |
| cggCGaacagucgacucagaacugguaca             | 90  | 1 | seq |
| cggugaacagucgacucagaacugguacGg            | 1   | 1 | seq |
| cggCGaacagucgacucagaacugguacag            | 2   | 1 | seq |
| cggugaacagucgacucagaacugguacGgac          | 1   | 1 | seq |
| cggCGaacagucgacucagaacugguacagaca         | 1   | 1 | seq |
| cggugaacagucgacucagaacugguacGgacaagg      | 1   | 1 | seq |
| ggGgaacagucgacucag                        | 1   | 1 | seq |
| ggugaacagucgacucag                        | 1   | 0 | seq |
| ggGgaacagucgacucaga                       | 1   | 1 | seq |
| ggugaacagucgacucaga                       | 1   | 0 | seq |
| ggugaacagucgacucagaacu                    | 1   | 0 | seq |
| ggugaacagucgacucagaacug                   | 5   | 0 | seq |
| ggGgaacagucgacucagaacug                   | 1   | 1 | seq |
| ggugaacagucgacucagaacugg                  | 1   | 0 | seq |
| ggGgaacagucgacucagaacugg                  | 1   | 1 | seq |
| ggGgaacagucgacucagaacuggu                 | 1   | 1 | seq |
| ggGgaacagucgacucagaacuggua                | 3   | 1 | seq |
| ggugaacagucgacucagaacuggua                | 4   | 0 | seq |
| ggCGaacagucgacucagaacugguaca              | 87  | 1 | seq |
| ggugaacagucgacucagaacugguacG              | 2   | 1 | seq |
| ggCGaacagucgacucagaacugguacag             | 5   | 1 | seq |
| ggugaacagucgacucagaacugguacGg             | 2   | 1 | seq |
| ggugaacagucgacucagaacugguacGga            | 1   | 1 | seq |
| ggCGaacagucgacucagaacugguacaga            | 3   | 1 | seq |
| ggugaacagucgacucagaacugguacGgac           | 2   | 1 | seq |
| ggugaacagucgacucagaacugguacGgaca          | 3   | 1 | seq |
| ggCGaacagucgacucagaacugguacagaca          | 4   | 1 | seq |
| ggugaacagucgacucagaacugguacGgacaag        | 1   | 1 | seq |
| ggugaacagucgacucagaacugguacGgacaagggggauc | 1   | 1 | seq |
| gugaacagucgacucaga                        | 1   | 0 | seq |
| gugaacagucgacucagaa                       | 1   | 0 | seq |
| gugaacagucgacucagaac                      | 1   | 0 | seq |
| gGgaacagucgacucagaac                      | 1   | 1 | seq |
| gugaacagucgacucagaacA                     | 1   | 1 | seq |
| gAgaacagucgacucagaacu                     | 1   | 1 | seq |
| gugaacagucgacucGgaacu                     | 1   | 1 | seq |
| gugaacagucgacucagaacu                     | 4   | 0 | seq |
| gGgaacagucgacucagaacu                     | 1   | 1 | seq |
| gugaacagucgacucagaacug                    | 5   | 0 | seq |
| gugaacagucgacucagaacugg                   | 1   | 0 | seq |
| gugaacagucgacucagaacugguG                 | 1   | 1 | seq |
| gugaacagucgacucagaacuggua                 | 6   | 0 | seq |
| gCGaacagucgacucagaacugguaca               | 226 | 1 | seq |
| gugaacagucgacucagaacugguaca               | 1   | 0 | seq |
| gCGaacagucgacucagaacugguacag              | 10  | 1 | seq |
| gugaacagucgacucagaacugguacGga             | 2   | 1 | seq |
| gCGaacagucgacucagaacugguacaga             | 3   | 1 | seq |
| gugaacagucgacucagaacugguacGgac            | 1   | 1 | seq |
| gugaacagucgacucagaacugguacGgaca           | 2   | 1 | seq |
| gCGaacagucgacucagaacugguacagaca           | 2   | 1 | seq |
| gugaacagucgacucagaacugguacGgacaagg        | 1   | 1 | seq |
| gCGaacagucgacucagaacugguacagacaagg        | 1   | 1 | seq |
| gCGaacagucgacucagaacugguacagacaagggg      | 1   | 1 | seq |
| ugaacagucgacucaga                         | 1   | 0 | seq |
| Agaacagucgacucaga                         | 2   | 1 | seq |

## Mature

## Star

uauggacguagaauguccucucgugggggaauuuucccuagcgguaa**cagucgacucagaaacugguacagacaaggggaaucgacuguuuaauuaaaacaaagaauu**

|                                                 |     |   |     |
|-------------------------------------------------|-----|---|-----|
| .....Ngaacagucgacucagaa.....                    | 1   | 1 | seq |
| .....Ggaacagucgacucagaa.....                    | 1   | 1 | seq |
| .....ugaacagucgacucagaa.....                    | 1   | 0 | seq |
| .....Ngaacagucgacucagaac.....                   | 2   | 1 | seq |
| .....Agaacagucgacucagaac.....                   | 1   | 1 | seq |
| .....Agaacagucgacucagaacu.....                  | 12  | 1 | seq |
| .....Ngaacagucgacucagaacu.....                  | 22  | 1 | seq |
| .....ugaacagucgacucagaacu.....                  | 24  | 0 | seq |
| .....ugaGcagucgacucagaacu.....                  | 1   | 1 | seq |
| .....ugaacagucgacucagaacC.....                  | 4   | 1 | seq |
| .....ugaacagucgacucagaacA.....                  | 1   | 1 | seq |
| .....Ggaacagucgacucagaacu.....                  | 31  | 1 | seq |
| .....Agaacagucgacucagaacug.....                 | 6   | 1 | seq |
| .....ugaacagucgacucagaacug.....                 | 14  | 0 | seq |
| .....Ngaacagucgacucagaacug.....                 | 7   | 1 | seq |
| .....Ggaacagucgacucagaacug.....                 | 32  | 1 | seq |
| .....ugaacagucgacucagaacugg.....                | 3   | 0 | seq |
| .....Ggaacagucgacucagaacugg.....                | 5   | 1 | seq |
| .....Ngaacagucgacucagaacugg.....                | 2   | 1 | seq |
| .....Agaacagucgacucagaacugg.....                | 2   | 1 | seq |
| .....Ngaacagucgacucagaacuggu.....               | 2   | 1 | seq |
| .....Agaacagucgacucagaacuggu.....               | 1   | 1 | seq |
| .....ugaacagucgacucagaacuggu.....               | 1   | 0 | seq |
| .....ugaacagucgacucagaacugggua.....             | 9   | 0 | seq |
| .....Ngaacagucgacucagaacugggua.....             | 4   | 1 | seq |
| .....ugaacaguGgacucagaacugggua.....             | 1   | 1 | seq |
| .....Ggaacagucgacucagaacugggua.....             | 18  | 1 | seq |
| .....Agaacagucgacucagaacugggua.....             | 3   | 1 | seq |
| .....Ngaacagucgacucagaacuggguac.....            | 1   | 1 | seq |
| .....Ggaacagucgacucagaacuggguac.....            | 2   | 1 | seq |
| .....ugaacagucgacucagaacuggguac.....            | 1   | 0 | seq |
| .....ugaacagucgacucagaacuggguaca.....           | 1   | 0 | seq |
| .....Cgaacagucgacucagaacuggguaca.....           | 377 | 1 | seq |
| .....ugaacagucgacucagaacuggguacG.....           | 6   | 1 | seq |
| .....Cgaacagucgacucagaacuggguacag.....          | 38  | 1 | seq |
| .....ugaacagucgacucagaacuggguacGg.....          | 10  | 1 | seq |
| .....ugaacagucgacucagaacuggguacGga.....         | 7   | 1 | seq |
| .....Cgaacagucgacucagaacuggguacaga.....         | 8   | 1 | seq |
| .....ugaacagucgacucagaacuggguacGgaca.....       | 12  | 1 | seq |
| .....Cgaacagucgacucagaacuggguacagaca.....       | 3   | 1 | seq |
| .....ugaacagucgacucagaacuggguacGgacaag.....     | 4   | 1 | seq |
| .....Cgaacagucgacucagaacuggguacagacaag.....     | 1   | 1 | seq |
| .....Cgaacagucgacucagaacuggguacagacaagg.....    | 3   | 1 | seq |
| .....ugaacagucgacucagaacuggguacGgacaagggg.....  | 2   | 1 | seq |
| .....Cgaacagucgacucagaacuggguacagacaagggga..... | 1   | 1 | seq |
| .....gGacagucgacucagaa.....                     | 4   | 1 | seq |
| .....gaacagucgacucagaG.....                     | 5   | 1 | seq |
| .....gaacagucgacucagaa.....                     | 326 | 0 | seq |
| .....Uaacagucgacucagaa.....                     | 1   | 1 | seq |
| .....Naacagucgacucagaa.....                     | 1   | 1 | seq |
| .....gaacagucgacucUaa.....                      | 1   | 1 | seq |
| .....gaacagucgGcucagaa.....                     | 1   | 1 | seq |
| .....gaacagucgacucagGa.....                     | 1   | 1 | seq |
| .....gaacagCcgacucagaa.....                     | 1   | 1 | seq |
| .....gaacGgucgacucagaa.....                     | 1   | 1 | seq |
| .....gaacagucgacucagCa.....                     | 1   | 1 | seq |
| .....gaacagucgacucagaC.....                     | 1   | 1 | seq |
| .....gaGcagucgacucagaa.....                     | 1   | 1 | seq |
| .....gaacUgucgacucagaa.....                     | 1   | 1 | seq |
| .....gaacagucgacucagaaA.....                    | 1   | 1 | seq |
| .....gaCcagucgacucagaac.....                    | 1   | 1 | seq |
| .....Uaacagucgacucagaac.....                    | 7   | 1 | seq |
| .....gaacagucgacucUgaac.....                    | 1   | 1 | seq |
| .....gaacCgucgacucagaac.....                    | 1   | 1 | seq |
| .....gaacagucgGcucagaac.....                    | 1   | 1 | seq |
| .....gaacagucUacucagaac.....                    | 1   | 1 | seq |
| .....gaacagucgacucagaac.....                    | 844 | 0 | seq |
| .....gaacGgucgacucagaac.....                    | 6   | 1 | seq |
| .....gGacagucgacucagaac.....                    | 4   | 1 | seq |
| .....gaacagucgacucagUac.....                    | 1   | 1 | seq |

## Mature

## Star

uauaggacguagaauuguccucugugggggaauuuucccuagggcggaacagucgacucagaaucgguacagacaaggggaaucugacuguuuaauuaaaacaaagaauu

|                                |      |   |     |
|--------------------------------|------|---|-----|
| .....Naacagucgacucagaac.....   | 2    | 1 | seq |
| .....gaGcagucgacucagaac.....   | 3    | 1 | seq |
| .....gaacagCcagucucagaac.....  | 2    | 1 | seq |
| .....gaacagucgacucagaUc.....   | 1    | 1 | seq |
| .....gaacagucgacucagaaU.....   | 17   | 1 | seq |
| .....gaacagucgacucagGac.....   | 2    | 1 | seq |
| .....gaacagucgacucagaGc.....   | 5    | 1 | seq |
| .....gaacagucgacucGgaac.....   | 3    | 1 | seq |
| .....gaacagucgacucUgaacu.....  | 4    | 1 | seq |
| .....gaGcagucgacucagaacu.....  | 24   | 1 | seq |
| .....gaacagucgUcucagaacu.....  | 1    | 1 | seq |
| .....gaacagucgacucagaaAu.....  | 1    | 1 | seq |
| .....gaacagucgacucaUaacu.....  | 3    | 1 | seq |
| .....gaacagucgacucagaacA.....  | 133  | 1 | seq |
| .....gaacagAcgacucagaacu.....  | 4    | 1 | seq |
| .....Uaacagucgacucagaacu.....  | 8    | 1 | seq |
| .....gaacagucgacucagGacu.....  | 18   | 1 | seq |
| .....gaacagucgacucagaacC.....  | 1190 | 1 | seq |
| .....Caacagucgacucagaacu.....  | 14   | 1 | seq |
| .....gaacagucgCcucagaacu.....  | 2    | 1 | seq |
| .....gaacagucgacucagaaUu.....  | 3    | 1 | seq |
| .....gaacagucgGcucagaacu.....  | 13   | 1 | seq |
| .....gaacGgucgacucagaacu.....  | 18   | 1 | seq |
| .....gaacagucgacucagaacu.....  | 1    | 1 | seq |
| .....gGacagucgacucagaacu.....  | 24   | 1 | seq |
| .....gaacagucgacCcagaacu.....  | 20   | 1 | seq |
| .....gCacagucgacucagaacu.....  | 1    | 1 | seq |
| .....gaacagucgacucGgaacu.....  | 2    | 1 | seq |
| .....gaacagucgacucGgaacu.....  | 23   | 1 | seq |
| .....gaacagucgacucGagaacu..... | 1    | 1 | seq |
| .....gaacUgucgacucagaacu.....  | 4    | 1 | seq |
| .....gaacagucgacucagUacu.....  | 3    | 1 | seq |
| .....gaacagucgaUucagaacu.....  | 2    | 1 | seq |
| .....gUacagucgacucagaacu.....  | 8    | 1 | seq |
| .....Naacagucgacucagaacu.....  | 12   | 1 | seq |
| .....gaacagucgacucagaacu.....  | 5    | 1 | seq |
| .....gaacagucgacucagaUcu.....  | 2    | 1 | seq |
| .....gaacagucgacucagaacG.....  | 212  | 1 | seq |
| .....gaUcagucgacucagaacu.....  | 3    | 1 | seq |
| .....gaacagCcagucucagaacu..... | 18   | 1 | seq |
| .....gaacagucgacucaCaacu.....  | 2    | 1 | seq |
| .....gaacagCcagucucagaacu..... | 1    | 1 | seq |
| .....gaacagucCacucagaacu.....  | 1    | 1 | seq |
| .....gaacagucgacucagaacu.....  | 7113 | 0 | seq |
| .....gaacagucUacucagaacu.....  | 2    | 1 | seq |
| .....gaacagucgacuUagaacu.....  | 3    | 1 | seq |
| .....gaacagucgacucagCacu.....  | 2    | 1 | seq |
| .....gaacagucgacucagaGcu.....  | 27   | 1 | seq |
| .....gaCcagucgacucagaacu.....  | 2    | 1 | seq |
| .....gaacagucgacGcagaacu.....  | 1    | 1 | seq |
| .....gaacagucgacucagaGcu.....  | 10   | 1 | seq |
| .....gaacagucgacCcagaacug..... | 8    | 1 | seq |
| .....Caacagucgacucagaacug..... | 7    | 1 | seq |
| .....gaGcagucgacucagaacug..... | 11   | 1 | seq |
| .....gaacGgucgacucagaacug..... | 9    | 1 | seq |
| .....gaacagCcagucagaacug.....  | 6    | 1 | seq |
| .....gaacagucgaUucagaacug..... | 1    | 1 | seq |
| .....gaacagucgacucagaacCg..... | 27   | 1 | seq |
| .....gaacagucgGcucagaacug..... | 4    | 1 | seq |
| .....gaacagucgacucagaacuU..... | 15   | 1 | seq |
| .....Naacagucgacucagaacug..... | 2    | 1 | seq |
| .....gaacagucgacucGgaacug..... | 9    | 1 | seq |
| .....gaacagucgacucagaacug..... | 2718 | 0 | seq |
| .....gaacagucgacucagaacGg..... | 22   | 1 | seq |
| .....gaacagucgacucagaaUug..... | 8    | 1 | seq |
| .....gaacUgucgacucagaacug..... | 4    | 1 | seq |
| .....gaacagucgacucagaacuC..... | 12   | 1 | seq |
| .....gUacagucgacucagaacug..... | 3    | 1 | seq |
| .....gaacagucgacucagGacug..... | 9    | 1 | seq |
| .....gaacagucgacucagaCcug..... | 1    | 1 | seq |

## Mature

## Star

uauaggacguagaauuccucucgugggggaauuuucccuagcgguaaacagucgacucagaaacugguacagacaaggggaaucugacuguuuaauuaaaacaagaauu

|                                    |     |   |     |
|------------------------------------|-----|---|-----|
| .....gaacagucgacucUgaaacug.....    | 3   | 1 | seq |
| .....gaaGagucgacucagaaacug.....    | 1   | 1 | seq |
| .....gaacagucgacucagaaacAg.....    | 16  | 1 | seq |
| .....gaacagucgCucagaaacug.....     | 1   | 1 | seq |
| .....gaacagucgacucUgaaacug.....    | 2   | 1 | seq |
| .....Uaacagucgacucagaaacug.....    | 3   | 1 | seq |
| .....gaacagucgacucagCacug.....     | 1   | 1 | seq |
| .....gaacagucgacGcagaaacug.....    | 2   | 1 | seq |
| .....gaacagucgUcucagaaacug.....    | 4   | 1 | seq |
| .....gaacagucgGucagaaacug.....     | 2   | 1 | seq |
| .....gGacagucgacucagaaacug.....    | 10  | 1 | seq |
| .....gaacagucgacucagaaacugg.....   | 924 | 0 | seq |
| .....gaacagucgacucagaaacugU.....   | 17  | 1 | seq |
| .....gaacagucgacucGgaacugg.....    | 3   | 1 | seq |
| .....gaacagucgacucagagCucugg.....  | 1   | 1 | seq |
| .....gaacagucgacucUgaaacugg.....   | 1   | 1 | seq |
| .....gaacagucgacucagaaUugg.....    | 1   | 1 | seq |
| .....gGacagucgacucagaaacugg.....   | 1   | 1 | seq |
| .....gaacagucgacucUgaaacugg.....   | 2   | 1 | seq |
| .....gaacagucgacucagaaacUg.....    | 2   | 1 | seq |
| .....gaacagucgCucagaaacugg.....    | 1   | 1 | seq |
| .....gaacagucgacCcagaaacugg.....   | 1   | 1 | seq |
| .....gaacagucgGcucagaaacugg.....   | 6   | 1 | seq |
| .....gaacagCcgacucagaaacugg.....   | 5   | 1 | seq |
| .....gaacagucgacucUaacugg.....     | 1   | 1 | seq |
| .....gaacagucgagGucagaaacugg.....  | 2   | 1 | seq |
| .....gaGcagucgacucagaaacugg.....   | 5   | 1 | seq |
| .....gaUcagucgacucagaaacugg.....   | 2   | 1 | seq |
| .....gaacagucgacucagaaacGgg.....   | 1   | 1 | seq |
| .....gaacagucgUcucagaaacugg.....   | 1   | 1 | seq |
| .....gaacagucgacucagGacugg.....    | 2   | 1 | seq |
| .....gaacagucgacucagaaacugC.....   | 2   | 1 | seq |
| .....gaacagucgacucagaaacugA.....   | 66  | 1 | seq |
| .....gGacagucgacucagaaacuggu.....  | 1   | 1 | seq |
| .....gaacagucgacucagaaacuggG.....  | 8   | 1 | seq |
| .....gaacagucgacAcagaaacuggu.....  | 2   | 1 | seq |
| .....gaacagucgGcucagaaacuggu.....  | 1   | 1 | seq |
| .....gaacGgucgacucagaaacuggu.....  | 1   | 1 | seq |
| .....gaacagucgacucGgaacuggu.....   | 1   | 1 | seq |
| .....gaGcagucgacucagaaacuggu.....  | 2   | 1 | seq |
| .....gaacagucgacucagaaacuggC.....  | 39  | 1 | seq |
| .....gaacagucgacucagaaacuggu.....  | 281 | 0 | seq |
| .....gaacagucgacucagGacuggu.....   | 1   | 1 | seq |
| .....gaacagucgacucCgaacuggua.....  | 1   | 1 | seq |
| .....Caacagucgacucagaaacuggua..... | 2   | 1 | seq |
| .....gaacagucgCucagaaacuggua.....  | 2   | 1 | seq |
| .....gaacagucgacucGgaacuggua.....  | 17  | 1 | seq |
| .....gaacUgucgacucagaaacuggua..... | 3   | 1 | seq |
| .....gaacagCcgacucagaaacuggua..... | 9   | 1 | seq |
| .....gaacagucgacucaUaacuggua.....  | 1   | 1 | seq |
| .....gaacagucgacucUgaaacuggua..... | 4   | 1 | seq |
| .....gaacagucgacucagaaacugCua..... | 2   | 1 | seq |
| .....gaacagucgacucagaaacugguC..... | 6   | 1 | seq |
| .....gaGcagucgacucagaaacuggua..... | 27  | 1 | seq |
| .....gaaGagucgacucagaaacuggua..... | 1   | 1 | seq |
| .....gaacagucgacucagaaacGggua..... | 2   | 1 | seq |
| .....gaacagucgacucagGacuggua.....  | 14  | 1 | seq |
| .....gaacagucgacucagaaacuUgua..... | 1   | 1 | seq |
| .....gaacagucgacAcagaaacuggua..... | 1   | 1 | seq |
| .....gaacagAcgacucagaaacuggua..... | 3   | 1 | seq |
| .....gaacagucgacucagaaUuggua.....  | 2   | 1 | seq |
| .....gaacagucgacucagaaacugguG..... | 89  | 1 | seq |
| .....gaacagucgGcucagaaacuggua..... | 10  | 1 | seq |
| .....gaacagucgacucGagaacuggua..... | 3   | 1 | seq |
| .....gUacagucgacucagaaacuggua..... | 3   | 1 | seq |
| .....gaacagucgacucUgaaacuggua..... | 2   | 1 | seq |
| .....Uaacagucgacucagaaacuggua..... | 8   | 1 | seq |
| .....gaCcagucgacucagaaacuggua..... | 1   | 1 | seq |
| .....gaacagucgacucagaaacugUua..... | 1   | 1 | seq |
| .....gaacagucgUcucagaaacuggua..... | 4   | 1 | seq |

## Mature

## Star

uauaggacguagaauuccucucgugggggaauuuuccuagcgguaaacagucgacucagaaacugguuacagacaaggggaaucugacuguuuaauuaaaacaagaauu

|                                       |      |   |     |
|---------------------------------------|------|---|-----|
| .....gaacagucgacucagaacuggCa.....     | 47   | 1 | seq |
| .....gaacaguAgacucagaacuggua.....     | 1    | 1 | seq |
| .....gaacagucgaUucagaacuggua.....     | 1    | 1 | seq |
| .....Naacagucgacucagaacuggua.....     | 10   | 1 | seq |
| .....gaacagucgacCcagaacuggua.....     | 21   | 1 | seq |
| .....gGacagucgacucagaacuggua.....     | 18   | 1 | seq |
| .....gaacagucgacucagaUcuggua.....     | 1    | 1 | seq |
| .....gaacagucgacucagaacugAua.....     | 5    | 1 | seq |
| .....gaacagGcgacucagaacuggua.....     | 2    | 1 | seq |
| .....gaacagucgacucagaacuggua.....     | 5200 | 0 | seq |
| .....gaacGgucgacucagaacuggua.....     | 19   | 1 | seq |
| .....gaacCgucgacucagaacuggua.....     | 3    | 1 | seq |
| .....gaacagucCacucagaacuggua.....     | 1    | 1 | seq |
| .....gaacagucgacucagaacugguU.....     | 13   | 1 | seq |
| .....gaacagucgacucagaGcuggua.....     | 13   | 1 | seq |
| .....gaacagucgacucagaacAggua.....     | 2    | 1 | seq |
| .....gaUcagucgacucagaacuggua.....     | 2    | 1 | seq |
| .....gaacagucgacucagCacuggua.....     | 1    | 1 | seq |
| .....gCacagucgacucagaacuggua.....     | 2    | 1 | seq |
| .....gaacagucgacucagaacCggua.....     | 10   | 1 | seq |
| .....gaacagucgacucagaacuggGa.....     | 12   | 1 | seq |
| .....gaacagucgacucagaacugguaA.....    | 10   | 1 | seq |
| .....gaacagucgacucGgaacugguac.....    | 3    | 1 | seq |
| .....gaacagucgacUucagaacugguac.....   | 2    | 1 | seq |
| .....gaacagucgacucagaacugUuac.....    | 2    | 1 | seq |
| .....gaacGgucgacucagaacugguac.....    | 1    | 1 | seq |
| .....gaacagucgacAcagaacugguac.....    | 1    | 1 | seq |
| .....gaacagucgaGucagaacugguac.....    | 1    | 1 | seq |
| .....Aaacagucgacucagaacugguac.....    | 3    | 1 | seq |
| .....gaacagucgacucagaacuggCaC.....    | 1    | 1 | seq |
| .....gaacagucgacuUagaacugguac.....    | 1    | 1 | seq |
| .....gaGcagucgacucagaacugguac.....    | 8    | 1 | seq |
| .....gaacagucgGcucagaacugguac.....    | 2    | 1 | seq |
| .....gaacagAgcagucagaacugguac.....    | 1    | 1 | seq |
| .....gaacagucgacucagaGcugguac.....    | 3    | 1 | seq |
| .....gaacagucgacucagaacugguuU.....    | 41   | 1 | seq |
| .....gGacagucgacucagaacugguac.....    | 3    | 1 | seq |
| .....gaacagucgacucagaacCgguaC.....    | 2    | 1 | seq |
| .....gaacagucgacucagaacugguGc.....    | 4    | 1 | seq |
| .....gaacagucgacucagaacugguUc.....    | 1    | 1 | seq |
| .....gaacagucgacucagaacugguuG.....    | 3    | 1 | seq |
| .....Naacagucgacucagaacugguac.....    | 1    | 1 | seq |
| .....gaacagucgacucagaacugguac.....    | 656  | 0 | seq |
| .....gaacUgucgacucagaacugguac.....    | 2    | 1 | seq |
| .....gaacagucgacCcagaacugguac.....    | 2    | 1 | seq |
| .....gaacagucgacucagGacugguac.....    | 1    | 1 | seq |
| .....gaacagucgacucagaacugUuaca.....   | 1    | 1 | seq |
| .....gaacagucgacCcagaacugguaca.....   | 1    | 1 | seq |
| .....gaacagucgacucagaacugguacC.....   | 11   | 1 | seq |
| .....gaacGgucgacucagaacugguaca.....   | 1    | 1 | seq |
| .....gaacagCcgacucagaacugguaca.....   | 1    | 1 | seq |
| .....gaacagucgacucagaacugguaca.....   | 240  | 0 | seq |
| .....gaacagucgacucagaGcugguaca.....   | 1    | 1 | seq |
| .....gaacagucgacucagGacugguaca.....   | 1    | 1 | seq |
| .....gaacagucgacucagaacugguGca.....   | 1    | 1 | seq |
| .....gaGcagucgacucagaacugguaca.....   | 1    | 1 | seq |
| .....gaacagucgacucagaacugguacU.....   | 26   | 1 | seq |
| .....gaacCgucgacucagaacugguaca.....   | 1    | 1 | seq |
| .....gGacagucgacucagaacugguaca.....   | 3    | 1 | seq |
| .....gaacagucgGcucagaacugguaca.....   | 3    | 1 | seq |
| .....gaacagucgacucGgaacugguaca.....   | 1    | 1 | seq |
| .....gaacagucgacucGgaacugguacag.....  | 1    | 1 | seq |
| .....gaacagucgacucagaacugguacUg.....  | 3    | 1 | seq |
| .....gaacagucAacucagaacugguacag.....  | 1    | 1 | seq |
| .....gaacagucgacucagGacugguacag.....  | 1    | 1 | seq |
| .....gaacagucgacucagaacugguacaA.....  | 2    | 1 | seq |
| .....gaacagucgacucagaacugguacag.....  | 28   | 0 | seq |
| .....gaacagucgacucagaacugguacCg.....  | 3    | 1 | seq |
| .....gaacagucgacucagaacugguacUga..... | 1    | 1 | seq |

## Mature

## Star

uauaggacguagaauuguccucucgugggggaauuuucccuagggcgguaaacagucgacucagagaacugguacagacaagggaucugacuguuuaauuaaaacaagaauu

|                                                         |      |   |     |
|---------------------------------------------------------|------|---|-----|
| .....gUacagucgacucagaacugguacaga.....                   | 1    | 1 | seq |
| .....gaacagucgacucagagaacugguacaga.....                 | 6    | 0 | seq |
| .....gaacagucgacucagagaacugguacagac.....                | 1    | 0 | seq |
| .....gaacagucgacucagagaGcugguacagac.....                | 1    | 1 | seq |
| .....gaacagucgacucagagaacugguacagaca.....               | 12   | 0 | seq |
| .....gaacagucgacucagagaacugguacagacU.....               | 1    | 1 | seq |
| .....gaacagucgacucagaacugguacagacG.....                 | 1    | 1 | seq |
| .....gaacagucgacucagaacugguacagCca.....                 | 1    | 1 | seq |
| .....gaacagucgacucagagaacugguacUgaca.....               | 1    | 1 | seq |
| .....gaacagucgacucagaacugguacagacaag.....               | 1    | 0 | seq |
| .....gaacagucgacucagagaacugguacagacaaggg.....           | 1    | 0 | seq |
| .....gaacagucgacucagaacugguacagacaagggA.....            | 1    | 1 | seq |
| .....gaacagucgacucagaacugguacUgacaaggggaa.....          | 1    | 1 | seq |
| .....gaacagucgacucagaacugguacGgacaaggggaaucu.....       | 9    | 1 | seq |
| .....gaacagucgacucagagaacugguacGgacaaggggaucugacug..... | 1    | 1 | seq |
| .....aGcagucgacucagaac.....                             | 14   | 1 | seq |
| .....Nacagucgacucagaac.....                             | 1    | 1 | seq |
| .....aacagucgGcucagaac.....                             | 7    | 1 | seq |
| .....aacagucgacucGgaac.....                             | 11   | 1 | seq |
| .....aacGgucgacucagaac.....                             | 11   | 1 | seq |
| .....Gacagucgacucagaac.....                             | 21   | 1 | seq |
| .....aacagucgacucagaaa.....                             | 5    | 1 | seq |
| .....aaGagucgacucagaac.....                             | 2    | 1 | seq |
| .....aacagucgacucagGac.....                             | 10   | 1 | seq |
| .....Uacagucgacucagaac.....                             | 4    | 1 | seq |
| .....aacagCcgacucagaac.....                             | 7    | 1 | seq |
| .....aacagucgacucagaac.....                             | 2805 | 0 | seq |
| .....aacagucgUcucagaac.....                             | 1    | 1 | seq |
| .....aacagucgacucagaUc.....                             | 2    | 1 | seq |
| .....aacagucgacucagaaU.....                             | 72   | 1 | seq |
| .....aacagucgacucUgaac.....                             | 3    | 1 | seq |
| .....aacagucgacucaUaac.....                             | 2    | 1 | seq |
| .....aacagucgacucaCaac.....                             | 2    | 1 | seq |
| .....aUcagucgacucagaac.....                             | 4    | 1 | seq |
| .....aacaguAgacucagaac.....                             | 1    | 1 | seq |
| .....aacagucgaUucagaac.....                             | 1    | 1 | seq |
| .....aacagucgacCcagaac.....                             | 8    | 1 | seq |
| .....Cacagucgacucagaac.....                             | 4    | 1 | seq |
| .....aacagucgacucagaCc.....                             | 3    | 1 | seq |
| .....aacagucgacCcagaacu.....                            | 100  | 1 | seq |
| .....aGcagucgacucagaacu.....                            | 103  | 1 | seq |
| .....aacagCcgacucagaacu.....                            | 52   | 1 | seq |
| .....aacagAcgacucagaacu.....                            | 19   | 1 | seq |
| .....aacagucgacucaUaacu.....                            | 7    | 1 | seq |
| .....aacagucgacucagaacC.....                            | 4844 | 1 | seq |
| .....aaGagucgacucagaacu.....                            | 16   | 1 | seq |
| .....aacagucgacucGgaacu.....                            | 91   | 1 | seq |
| .....aacagucgacucGagaacu.....                           | 2    | 1 | seq |
| .....aacagucgGcucagaacu.....                            | 91   | 1 | seq |
| .....aacagucgCcucagaacu.....                            | 6    | 1 | seq |
| .....aacagGcgacucagaacu.....                            | 7    | 1 | seq |
| .....aacagucgUcucagaacu.....                            | 14   | 1 | seq |
| .....aacaguGgacucagaacu.....                            | 2    | 1 | seq |
| .....aacagucgacucagCacu.....                            | 4    | 1 | seq |
| .....Gacagucgacucagaacu.....                            | 147  | 1 | seq |
| .....Uacagucgacucagaacu.....                            | 30   | 1 | seq |
| .....aacagucgacGcagaacu.....                            | 9    | 1 | seq |
| .....aacagucgaGucagaacu.....                            | 2    | 1 | seq |
| .....aacagucgacucCgaacu.....                            | 2    | 1 | seq |
| .....aacagucgacucagacCcu.....                           | 3    | 1 | seq |
| .....aacagucgacucagaaAu.....                            | 2    | 1 | seq |
| .....aacagucCacucagaacu.....                            | 3    | 1 | seq |
| .....aUcagucgacucagaacu.....                            | 20   | 1 | seq |
| .....aacagucgacucagaaUu.....                            | 19   | 1 | seq |
| .....aacagucgacucagaUcu.....                            | 4    | 1 | seq |
| .....aacagucgacucUgaacu.....                            | 24   | 1 | seq |
| .....aacaguAgacucagaacu.....                            | 3    | 1 | seq |
| .....aacCgucgacucagaacu.....                            | 2    | 1 | seq |
| .....Cacagucgacucagaacu.....                            | 33   | 1 | seq |
| .....aacagucgacAcagaacu.....                            | 12   | 1 | seq |



## Mature

## Star

uauaggacguagaauuguccucucgugggggaauuuucccuagcgguagaaacagucgacucagaaacugguacagacaaggggaaucugacuguuuaauuaaaacaagaauu

|                                |       |   |     |
|--------------------------------|-------|---|-----|
| .....aacagucgaUucagaacu.....   | 12    | 1 | seq |
| .....aacagucgacucagaaGu.....   | 2     | 1 | seq |
| .....aacGgucgacucagaacu.....   | 86    | 1 | seq |
| .....Nacagucgacucagaacu.....   | 44    | 1 | seq |
| .....aacagucgacucagaacG.....   | 748   | 1 | seq |
| .....aCagucgacucagaacu.....    | 4     | 1 | seq |
| .....aacagucgacucagaacu.....   | 30262 | 0 | seq |
| .....aacagucgacucagUacu.....   | 20    | 1 | seq |
| .....aacagucgacucagGacu.....   | 96    | 1 | seq |
| .....aCagucgacucagaacug.....   | 1     | 1 | seq |
| .....aacaguGgacucagaacug.....  | 1     | 1 | seq |
| .....aacagucgaUucagaacug.....  | 7     | 1 | seq |
| .....Uacagucgacucagaacug.....  | 6     | 1 | seq |
| .....aacagucgacucGgaacug.....  | 46    | 1 | seq |
| .....aacagucgacucagGacu.....   | 43    | 1 | seq |
| .....aaGagucgacucagaacug.....  | 3     | 1 | seq |
| .....aacagucgacucaUaacug.....  | 1     | 1 | seq |
| .....Cacagucgacucagaacug.....  | 18    | 1 | seq |
| .....aacCgucgacucagaacug.....  | 2     | 1 | seq |
| .....aacagucgaUucagaacug.....  | 1     | 1 | seq |
| .....aGcagucgacucagaacug.....  | 28    | 1 | seq |
| .....aacagucgacucagaacGg.....  | 52    | 1 | seq |
| .....aacagCcgacucagaacug.....  | 22    | 1 | seq |
| .....aacagucgacucagaacAg.....  | 42    | 1 | seq |
| .....aUcagucgacucagaacug.....  | 6     | 1 | seq |
| .....aacagucgacACagaacug.....  | 7     | 1 | seq |
| .....aacagucgacucagaAaUug..... | 1     | 1 | seq |
| .....aacagucgacucagaAaUug..... | 21    | 1 | seq |
| .....aacaguAgacucagaacug.....  | 1     | 1 | seq |
| .....aacagucgacUagaacug.....   | 3     | 1 | seq |
| .....aacagGcgacucagaacug.....  | 2     | 1 | seq |
| .....aacagucgGcucagaacug.....  | 34    | 1 | seq |
| .....aacagucgacucagaCcug.....  | 2     | 1 | seq |
| .....aacagucgacucagUacug.....  | 2     | 1 | seq |
| .....aacagucgUcucagaacug.....  | 6     | 1 | seq |
| .....aacagucgacucagCacug.....  | 3     | 1 | seq |
| .....aacagucgacucagaacuU.....  | 54    | 1 | seq |
| .....aacagucgacCcagaacug.....  | 21    | 1 | seq |
| .....Nacagucgacucagaacug.....  | 5     | 1 | seq |
| .....aacGgucgacucagaacug.....  | 31    | 1 | seq |
| .....aacagAGcagucagaacug.....  | 5     | 1 | seq |
| .....aacagucgacucUgaacug.....  | 6     | 1 | seq |
| .....aacagucgacucagaacCg.....  | 91    | 1 | seq |
| .....aacagucgacucagaUcug.....  | 2     | 1 | seq |
| .....aacagucgacGcagaacug.....  | 5     | 1 | seq |
| .....aacagucgacucagaacuC.....  | 32    | 1 | seq |
| .....Gacagucgacucagaacug.....  | 42    | 1 | seq |
| .....aacagucgacucagaacug.....  | 9509  | 0 | seq |
| .....aacUgucgacucagaacug.....  | 8     | 1 | seq |
| .....aacagucgacuAagaacugg..... | 1     | 1 | seq |
| .....aacGgucgacucagaacugg..... | 6     | 1 | seq |
| .....aacagucgacGcagaacugg..... | 1     | 1 | seq |
| .....aacagucgacucagaCcugg..... | 1     | 1 | seq |
| .....aacUgucgacucagaacugg..... | 3     | 1 | seq |
| .....aacagAGcagucagaacugg..... | 1     | 1 | seq |
| .....aacagucgacucagaacCgg..... | 11    | 1 | seq |
| .....aacagCcagucagaacugg.....  | 6     | 1 | seq |
| .....aacagucgacucagaacAgg..... | 2     | 1 | seq |
| .....aacagucgacucagaacuUg..... | 11    | 1 | seq |
| .....aacagucgacucagaacuCg..... | 1     | 1 | seq |
| .....Uacagucgacucagaacugg..... | 3     | 1 | seq |
| .....aacagucgacCcagaacugg..... | 9     | 1 | seq |
| .....aacagucgacucagaacugU..... | 33    | 1 | seq |
| .....aGcagucgacucagaacugg..... | 12    | 1 | seq |
| .....Cacagucgacucagaacugg..... | 11    | 1 | seq |
| .....aacagucgacucUgaacugg..... | 2     | 1 | seq |
| .....aacagucCacucagaacugg..... | 1     | 1 | seq |
| .....aacagucgacucagaacugA..... | 199   | 1 | seq |
| .....aaGagucgacucagaacugg..... | 1     | 1 | seq |
| .....aacagucgacucaUaacugg..... | 1     | 1 | seq |

## Mature

## Star

uauggacguagaauguccucucgugggggaauuuucccuagggcgugaaacagucgacucagaacacugguacagacaaggggaaucugacuguuuaauuaaaacaagaauu

|                                  |      |   |     |
|----------------------------------|------|---|-----|
| .....aacagucgacucagUacugg.....   | 3    | 1 | seq |
| .....aacagucgacucagaaUugg.....   | 3    | 1 | seq |
| .....aacagucgacucagaaacGgg.....  | 5    | 1 | seq |
| .....aacagucgUcucagaacugg.....   | 1    | 1 | seq |
| .....aacagucgacucagaacugg.....   | 2608 | 0 | seq |
| .....aacagucgacucagaacugC.....   | 20   | 1 | seq |
| .....Nacagucgacucagaacugg.....   | 8    | 1 | seq |
| .....aacagucgGcucagaacugg.....   | 10   | 1 | seq |
| .....aacagucgacucagGacugg.....   | 14   | 1 | seq |
| .....aacagucgacUagaacugg.....    | 3    | 1 | seq |
| .....Gacagucgacucagaacugg.....   | 12   | 1 | seq |
| .....aacagucgacucGgaacugg.....   | 6    | 1 | seq |
| .....aacagucgaUucagaacugg.....   | 1    | 1 | seq |
| .....aacagucgacucagaacuggC.....  | 66   | 1 | seq |
| .....aacUgucgacucagaacuggu.....  | 1    | 1 | seq |
| .....aacagucgacucagaaUuggu.....  | 1    | 1 | seq |
| .....aacagAGgacucagaacuggu.....  | 1    | 1 | seq |
| .....aacagucgacucGgaacuggu.....  | 2    | 1 | seq |
| .....aacagucgacCagaacuggu.....   | 3    | 1 | seq |
| .....Cacagucgacucagaacuggu.....  | 2    | 1 | seq |
| .....aacGgucgacucagaacuggu.....  | 1    | 1 | seq |
| .....Gacagucgacucagaacuggu.....  | 3    | 1 | seq |
| .....aacagucgacACagaacuggu.....  | 1    | 1 | seq |
| .....aacagucgacucagaacugCu.....  | 5    | 1 | seq |
| .....aacagucgacUagaacuggu.....   | 1    | 1 | seq |
| .....aacagucgacucagaacugAu.....  | 1    | 1 | seq |
| .....aacagucgacucagaacCggu.....  | 1    | 1 | seq |
| .....aacagucgacucagaacuggu.....  | 463  | 0 | seq |
| .....aacagucgacucagaacuCgu.....  | 1    | 1 | seq |
| .....aacagucgacucagaacuggG.....  | 19   | 1 | seq |
| .....aacagucgacucagGacuggu.....  | 1    | 1 | seq |
| .....aacagucgCcucagaacuggua..... | 1    | 1 | seq |
| .....aacagucgacucagaacugCua..... | 1    | 1 | seq |
| .....aUcagucgacucagaacuggua..... | 2    | 1 | seq |
| .....aacagucgaUucagaacuggua..... | 1    | 1 | seq |
| .....aacaguAGacucagaacuggua..... | 1    | 1 | seq |
| .....aacagucgacucagaacAGgua..... | 1    | 1 | seq |
| .....aacagucgacucagaacuggua..... | 4084 | 0 | seq |
| .....Cacagucgacucagaacuggua..... | 3    | 1 | seq |
| .....aacagucgacucagUacuggua..... | 1    | 1 | seq |
| .....Nacagucgacucagaacuggua..... | 12   | 1 | seq |
| .....aacagucgacucagCacuggua..... | 1    | 1 | seq |
| .....aacagucgGcucagaacuggua..... | 10   | 1 | seq |
| .....aacagucgacucGgaacuggua..... | 13   | 1 | seq |
| .....aacagucgacucUgaacuggua..... | 4    | 1 | seq |
| .....aacUgucgacucagaacuggua..... | 3    | 1 | seq |
| .....aacagucgacucagaacugguC..... | 4    | 1 | seq |
| .....aacagCcgacucagaacuggua..... | 8    | 1 | seq |
| .....aacagucgacucagaacugAu.....  | 10   | 1 | seq |
| .....aacagucgacACagaacuggua..... | 2    | 1 | seq |
| .....aacagucgacCagaacuggua.....  | 16   | 1 | seq |
| .....aacagucgacucagaacuUgua..... | 1    | 1 | seq |
| .....aacagGcgacucagaacuggua..... | 2    | 1 | seq |
| .....aacagucgacucagaacuggCa..... | 48   | 1 | seq |
| .....aacGgucgacucagaacuggua..... | 13   | 1 | seq |
| .....aacagucgacucagaGcuggua..... | 14   | 1 | seq |
| .....aacagucgacucagaacuggGa..... | 16   | 1 | seq |
| .....aacagucgacucagaacugUua..... | 11   | 1 | seq |
| .....aacagucgacucagaacCggu.....  | 4    | 1 | seq |
| .....aCcagucgacucagaacuggua..... | 1    | 1 | seq |
| .....aacagucgacucagGacuggua..... | 20   | 1 | seq |
| .....Gacagucgacucagaacuggua..... | 24   | 1 | seq |
| .....aacagucgacucaUaacuggua..... | 1    | 1 | seq |
| .....aacagAGgacucagaacuggua..... | 4    | 1 | seq |
| .....aacagucgacucagaaUuggua..... | 2    | 1 | seq |
| .....Uacagucgacucagaacuggua..... | 2    | 1 | seq |
| .....aacagucgUcucagaacuggua..... | 1    | 1 | seq |
| .....aacagucgacucagaacugguU..... | 15   | 1 | seq |
| .....aGcagucgacucagaacuggua..... | 14   | 1 | seq |
| .....aacagucgacucGgaacuggua..... | 1    | 1 | seq |

## Mature

## Star

uauggacguagaauGCCUCUCGUGGGGGAUUUCCCUAGGCGGUGAAcagucgacucagaaacugguacagacaagggaauucugacuguuuaauuaaaacaagaauu

|                                        |     |   |     |
|----------------------------------------|-----|---|-----|
| .....aacagucgacucagaaacGggua.....      | 3   | 1 | seq |
| .....aacagucgacucagaaacugguG.....      | 66  | 1 | seq |
| .....aacagucgacucagaaUugguac.....      | 1   | 1 | seq |
| .....aacagucgacucagaaacuggCaC.....     | 1   | 1 | seq |
| .....aacagucgacuAagaacugguac.....      | 1   | 1 | seq |
| .....aGcagucgacucagaaacugguac.....     | 3   | 1 | seq |
| .....aacaguAagacucagaaacugguac.....    | 1   | 1 | seq |
| .....aacagucgacucUgaacugguac.....      | 1   | 1 | seq |
| .....aacagucgacucagaaacugguac.....     | 627 | 0 | seq |
| .....Nacagucgacucagaaacugguac.....     | 1   | 1 | seq |
| .....aUcagucgacucagaaacugguac.....     | 1   | 1 | seq |
| .....aacagucgacucagaaacugguGc.....     | 5   | 1 | seq |
| .....aacagucgacuGagaacugguac.....      | 1   | 1 | seq |
| .....aacagCcgacucagaaacugguac.....     | 2   | 1 | seq |
| .....aacagucgacucagGacugguac.....      | 2   | 1 | seq |
| .....aacGgucgacucagaaacugguac.....     | 1   | 1 | seq |
| .....aacagucgacucagaaacugguAA.....     | 6   | 1 | seq |
| .....aacagucgacucGgaacugguac.....      | 2   | 1 | seq |
| .....aacagucgacucagCacugguac.....      | 1   | 1 | seq |
| .....aacagucgacucagaaacugguAG.....     | 1   | 1 | seq |
| .....aacagucgaUucagaaacugguac.....     | 1   | 1 | seq |
| .....aacagucgGcucagaaacugguac.....     | 2   | 1 | seq |
| .....Uacagucgacucagaaacugguac.....     | 1   | 1 | seq |
| .....Gacagucgacucagaaacugguac.....     | 7   | 1 | seq |
| .....aacagucgacCcagaacugguac.....      | 2   | 1 | seq |
| .....aacagucgacucagaGcugguac.....      | 3   | 1 | seq |
| .....aacagucgacucagaaacugguAUa.....    | 1   | 1 | seq |
| .....aaUagucgacucagaaacugguaca.....    | 2   | 1 | seq |
| .....aacagucgacucagaaacugguaca.....    | 479 | 0 | seq |
| .....aacagucgacucGgaacugguaca.....     | 2   | 1 | seq |
| .....aacagucgacucUgaacugguaca.....     | 1   | 1 | seq |
| .....aacagAagacucagaaacugguaca.....    | 1   | 1 | seq |
| .....aacGgucgacucagaaacugguaca.....    | 4   | 1 | seq |
| .....aGcagucgacucagaaacugguaca.....    | 1   | 1 | seq |
| .....aacagucgacuUagaacugguaca.....     | 2   | 1 | seq |
| .....aacaAucgacucagaaacugguaca.....    | 1   | 1 | seq |
| .....aacagucgacucagaGcugguaca.....     | 3   | 1 | seq |
| .....aacagucgacucagaaacuCguaca.....    | 1   | 1 | seq |
| .....Uacagucgacucagaaacugguaca.....    | 1   | 1 | seq |
| .....aacagucgacucaAaacugguaca.....     | 1   | 1 | seq |
| .....aacagucgacucagaaacuggCaca.....    | 1   | 1 | seq |
| .....aacagucgacucagaaacugguacC.....    | 30  | 1 | seq |
| .....aacagucgUcucagaaacugguaca.....    | 3   | 1 | seq |
| .....aacagucgacucagaaacugguGca.....    | 5   | 1 | seq |
| .....aacagucgaUucagaaacugguaca.....    | 1   | 1 | seq |
| .....aacagucgacucagaaacugguUca.....    | 1   | 1 | seq |
| .....aacagucAacucagaaacugguaca.....    | 3   | 1 | seq |
| .....aacagucgacucagaaacugguAGa.....    | 1   | 1 | seq |
| .....aacagucgacucagaaacugguacU.....    | 49  | 1 | seq |
| .....aCcagucgacucagaaacugguaca.....    | 1   | 1 | seq |
| .....aacagCcgacucagaaacugguacag.....   | 1   | 1 | seq |
| .....aacagucgacucagaaacugguacUg.....   | 15  | 1 | seq |
| .....aacagucgacucagaaacugguacaC.....   | 2   | 1 | seq |
| .....aacagucgacucagaaacugguacCg.....   | 19  | 1 | seq |
| .....aacGgucgacucagaaacugguacag.....   | 1   | 1 | seq |
| .....aacagucAacucagaaacugguacag.....   | 2   | 1 | seq |
| .....Cacagucgacucagaaacugguacag.....   | 1   | 1 | seq |
| .....aacagucgacucagaaacugguacag.....   | 151 | 0 | seq |
| .....Gacagucgacucagaaacugguacag.....   | 1   | 1 | seq |
| .....aacagucgacucagaaacCgguacag.....   | 3   | 1 | seq |
| .....aacagucgacucGgaacugguacag.....    | 1   | 1 | seq |
| .....aacagucgacucagaaacugguacaA.....   | 4   | 1 | seq |
| .....Nacagucgacucagaaacugguacag.....   | 1   | 1 | seq |
| .....aacagucgacucagaaacugguacaU.....   | 1   | 1 | seq |
| .....aacagucgacucagaaacugguacCga.....  | 3   | 1 | seq |
| .....aacagucgacucagaaacugguacUga.....  | 4   | 1 | seq |
| .....aacagucgacucagaaacugguacaga.....  | 19  | 0 | seq |
| .....aacagucgacucagaaacugguacagC.....  | 1   | 1 | seq |
| .....aacagucgacucagaaacugguacUgac..... | 1   | 1 | seq |
| .....aacagucgacucagaaacugguCcagac..... | 1   | 1 | seq |

## Mature

## Star

uauaggacguagaauuguccucucgugggggaauuuucccuagggcgugaaacagucgacucagagaacugguacagacagaaggggaucugacuguuuaauuaaaacaagaauu

|                                                           |       |   |     |
|-----------------------------------------------------------|-------|---|-----|
| .....aacagucgacucagagaacugguacagaU.....                   | 1     | 1 | seq |
| .....aacagucgacucagagaacugguacagac.....                   | 1     | 0 | seq |
| .....aacagucgacucagagaacugguacUgaca.....                  | 6     | 1 | seq |
| .....aacagucgacucagagaacugguacCgaca.....                  | 1     | 1 | seq |
| .....aacagucgUcucagagaacugguacagaca.....                  | 1     | 1 | seq |
| .....aacagucgacucagagaacugguacagacG.....                  | 2     | 1 | seq |
| .....aacagucgacucagagaacugguacagaca.....                  | 34    | 0 | seq |
| .....aacGgucgacucagagaacugguacagaca.....                  | 1     | 1 | seq |
| .....aacagucgacucagagaacugguacagacaa.....                 | 1     | 0 | seq |
| .....aacagucgacucagagaacugguacagacaaA.....                | 1     | 1 | seq |
| .....aacagucgacucagagaacugguacagacaag.....                | 3     | 0 | seq |
| .....aacagucgacucagagaacugguacUgacaagg.....               | 1     | 1 | seq |
| .....aacagucgacucagagaacugguacagacaagggg.....             | 2     | 0 | seq |
| .....aacagucgacucagagaacugguacagacaaggggaa.....           | 2     | 0 | seq |
| .....aacagucgacucaUaacugguacagacaaggggaa.....             | 1     | 1 | seq |
| .....aacagucgacucagagaacugguacagacaaggggaaU.....          | 1     | 0 | seq |
| .....aacagucgacucagagaacugguacGgacaaggggaaucu.....        | 75    | 1 | seq |
| .....aacagucgacucagagaacugguacCgacaaggggaaucug.....       | 1     | 1 | seq |
| .....aacagucgacucagagaacugguacGgacaaggggaaucug.....       | 2     | 1 | seq |
| .....aacagucgacucagagaacugguacGgacaaggggaaucugacugu.....  | 1     | 1 | seq |
| .....aacagucgacucagagaacugguacGgacaaggggaaucugacuguu..... | 2     | 1 | seq |
| .....acagGcgacucagaaacu.....                              | 31    | 1 | seq |
| .....acaguGgacucagaaacu.....                              | 15    | 1 | seq |
| .....acagucgacucagaaUcu.....                              | 15    | 1 | seq |
| .....Ucagucgacucagaaacu.....                              | 116   | 1 | seq |
| .....acagucgacGcagaaacu.....                              | 6     | 1 | seq |
| .....acagucgacucCgaacu.....                               | 20    | 1 | seq |
| .....acagucgacucUgaacu.....                               | 67    | 1 | seq |
| .....aGagucgacucagaaacu.....                              | 10    | 1 | seq |
| .....Ncagucgacucagaaacu.....                              | 151   | 1 | seq |
| .....acCgucgacucagaaacu.....                              | 26    | 1 | seq |
| .....acagucgacucagaaacG.....                              | 2491  | 1 | seq |
| .....acagucgacucagaaacu.....                              | 96757 | 0 | seq |
| .....acagCcgacucagaaacu.....                              | 255   | 1 | seq |
| .....acagucgacucagaaUu.....                               | 70    | 1 | seq |
| .....acagucgCucagaaacu.....                               | 9     | 1 | seq |
| .....acagucgacuGagaacu.....                               | 36    | 1 | seq |
| .....acagucgacucagUacu.....                               | 56    | 1 | seq |
| .....acagucgacAcagaaacu.....                              | 30    | 1 | seq |
| .....acagucgacucagaaacC.....                              | 15498 | 1 | seq |
| .....acagucgaGucagaaacu.....                              | 40    | 1 | seq |
| .....acaguAagacucagaaacu.....                             | 22    | 1 | seq |
| .....acGgucgacucagaaacu.....                              | 353   | 1 | seq |
| .....acagucgacucagaaGu.....                               | 17    | 1 | seq |
| .....acagucgacucGgaacu.....                               | 304   | 1 | seq |
| .....acagucgacucagaaAu.....                               | 15    | 1 | seq |
| .....acagucgacuAagaacu.....                               | 16    | 1 | seq |
| .....acagucgGcucagaaacu.....                              | 255   | 1 | seq |
| .....aNagucgacucagaaacu.....                              | 1     | 1 | seq |
| .....acagucgacucagCacu.....                               | 14    | 1 | seq |
| .....acagucgaUucagaaacu.....                              | 58    | 1 | seq |
| .....acagucgacuUaacu.....                                 | 26    | 1 | seq |
| .....acagucCacucagaaacu.....                              | 4     | 1 | seq |
| .....Ccagucgacucagaaacu.....                              | 39    | 1 | seq |
| .....Gcagucgacucagaaacu.....                              | 445   | 1 | seq |
| .....acagucgacucagaCcu.....                               | 21    | 1 | seq |
| .....acagAcgacucagaaacu.....                              | 27    | 1 | seq |
| .....acagucgacCcagaaacu.....                              | 248   | 1 | seq |
| .....acagAcgacucagaacug.....                              | 22    | 1 | seq |
| .....acagucgacuUagaacug.....                              | 24    | 1 | seq |
| .....acagucgacucagCacug.....                              | 15    | 1 | seq |
| .....acagucgacuUaacug.....                                | 4     | 1 | seq |
| .....acagucCacucagaacug.....                              | 2     | 1 | seq |
| .....Ucagucgacucagaacug.....                              | 63    | 1 | seq |
| .....acagucgacucagaUcug.....                              | 5     | 1 | seq |
| .....acagCcgacucagaacug.....                              | 132   | 1 | seq |
| .....Gcagucgacucagaacug.....                              | 257   | 1 | seq |
| .....Ccagucgacucagaacug.....                              | 30    | 1 | seq |
| .....acCgucgacucagaacug.....                              | 13    | 1 | seq |
| .....acaguGgacucagaacug.....                              | 10    | 1 | seq |

## Mature

## Star

uauggacguagaauguccucucgugggggaauuuucccuagggcgugaaacagucgacucagaaacugguacagacaaaggggaucugacuguuuaauuaaaacaaagaauu

|                                |       |   |     |
|--------------------------------|-------|---|-----|
| .....acagGcgcacucagaacug.....  | 11    | 1 | seq |
| .....acUgucgacucagaacug.....   | 62    | 1 | seq |
| .....acagucgacucGgaacug.....   | 180   | 1 | seq |
| .....acagucgacucGgaacug.....   | 7     | 1 | seq |
| .....acagucgacucagaacCg.....   | 538   | 1 | seq |
| .....acGgucgacucagaacug.....   | 225   | 1 | seq |
| .....acagucgaGucagaacug.....   | 28    | 1 | seq |
| .....acagucgacuGagaacug.....   | 18    | 1 | seq |
| .....aGagucgacucagaacug.....   | 4     | 1 | seq |
| .....acagucgacucagaacug.....   | 59893 | 0 | seq |
| .....acagucgacCcagaacug.....   | 139   | 1 | seq |
| .....acagucgacucagUacug.....   | 30    | 1 | seq |
| .....acagucgCcucagaacug.....   | 14    | 1 | seq |
| .....acagucgacAcagaacug.....   | 23    | 1 | seq |
| .....acagucgaUucagaacug.....   | 40    | 1 | seq |
| .....acagucgacucagaacGg.....   | 343   | 1 | seq |
| .....acagucgacucagaaUug.....   | 126   | 1 | seq |
| .....acagucgacucagaaAug.....   | 13    | 1 | seq |
| .....acagucgacucagaacuC.....   | 171   | 1 | seq |
| .....acagucgGcucagaacug.....   | 148   | 1 | seq |
| .....acagucgacucagaacU.....    | 424   | 1 | seq |
| .....acagucgacucUgaacug.....   | 39    | 1 | seq |
| .....acagucgacucagaaGug.....   | 14    | 1 | seq |
| .....Ncagucgacucagaacug.....   | 76    | 1 | seq |
| .....acagucgacucagGacug.....   | 215   | 1 | seq |
| .....aNagucgacucagaacug.....   | 1     | 1 | seq |
| .....acagucgacucagaacAg.....   | 282   | 1 | seq |
| .....acagucgacucagaCcug.....   | 7     | 1 | seq |
| .....acagucgacuAagaacug.....   | 9     | 1 | seq |
| .....acaguAgacucagaacug.....   | 17    | 1 | seq |
| .....acagucgacGcagaacug.....   | 5     | 1 | seq |
| .....acagucgCcucagaacugg.....  | 3     | 1 | seq |
| .....acCgucgacucagaacugg.....  | 6     | 1 | seq |
| .....acagucgacCcagaacugg.....  | 83    | 1 | seq |
| .....acagucgacucagaacuUg.....  | 27    | 1 | seq |
| .....acagucgacucagaacCgg.....  | 135   | 1 | seq |
| .....acagucgacucagCacugg.....  | 3     | 1 | seq |
| .....acUgucgacucagaacugg.....  | 44    | 1 | seq |
| .....acagucgacuUagaacugg.....  | 17    | 1 | seq |
| .....acagCcgcacucagaacugg..... | 57    | 1 | seq |
| .....Ccagucgacucagaacugg.....  | 19    | 1 | seq |
| .....acGgucgacucagaacugg.....  | 132   | 1 | seq |
| .....acagucgacucagaacugg.....  | 34229 | 0 | seq |
| .....acagucgacucagaUcugg.....  | 7     | 1 | seq |
| .....acagucgacucagGacugg.....  | 98    | 1 | seq |
| .....acagucgacucGgaacugg.....  | 100   | 1 | seq |
| .....acagucgaUucagaacugg.....  | 13    | 1 | seq |
| .....acagucgacucagaCcugg.....  | 6     | 1 | seq |
| .....acagAcgacucagaacugg.....  | 13    | 1 | seq |
| .....acagGcgcacucagaacugg..... | 7     | 1 | seq |
| .....acagucgaNucagaacugg.....  | 1     | 1 | seq |
| .....acaguGgacucagaacugg.....  | 6     | 1 | seq |
| .....acagucgacucagaaUugg.....  | 4     | 1 | seq |
| .....acagucgacucGgaacugg.....  | 8     | 1 | seq |
| .....acagucgacucagUacugg.....  | 19    | 1 | seq |
| .....acagucgacucagaaGugg.....  | 4     | 1 | seq |
| .....acagucgacucagaacuCg.....  | 28    | 1 | seq |
| .....Gcagucgacucagaacugg.....  | 155   | 1 | seq |
| .....acagucgacucagaacugC.....  | 279   | 1 | seq |
| .....acagucgacucagaacGgg.....  | 93    | 1 | seq |
| .....acagucgacuUaacugg.....    | 5     | 1 | seq |
| .....acagucgacucUgaacugg.....  | 15    | 1 | seq |
| .....acagucgacucagaaUugg.....  | 16    | 1 | seq |
| .....acagucgacGcagaacugg.....  | 2     | 1 | seq |
| .....acagucgacucagaacugA.....  | 2264  | 1 | seq |
| .....acagucgGcucagaacugg.....  | 111   | 1 | seq |
| .....Ucagucgacucagaacugg.....  | 25    | 1 | seq |
| .....acagucgacuAagaacugg.....  | 4     | 1 | seq |
| .....acagucgacAcagaacugg.....  | 14    | 1 | seq |
| .....Ncagucgacucagaacugg.....  | 59    | 1 | seq |

## Mature

## Star

uauaggacguagaauuguccucucgugggggaauuuuccuagggcgguagaaacagucgacucagagaacugguacagacaaggggaaucugacuguuuaauuaaaacaagaauu

|                                  |      |   |     |
|----------------------------------|------|---|-----|
| .....acagucgacucagaacAgg.....    | 25   | 1 | seq |
| .....acagucgacucagaacugU.....    | 323  | 1 | seq |
| .....acaguAagacucagaacugg.....   | 7    | 1 | seq |
| .....acagucgacUGagaacugg.....    | 13   | 1 | seq |
| .....acagucgaGucagaacugg.....    | 15   | 1 | seq |
| .....acagucgacucUGaacuggu.....   | 1    | 1 | seq |
| .....Gcagucgacucagaacuggu.....   | 4    | 1 | seq |
| .....acagucgacGcagaacuggu.....   | 1    | 1 | seq |
| .....acagucgacucagaacGggu.....   | 2    | 1 | seq |
| .....acagucgacucagaacugAu.....   | 7    | 1 | seq |
| .....acUGucgacucagaacuggu.....   | 2    | 1 | seq |
| .....acagucgacucGgaacuggu.....   | 6    | 1 | seq |
| .....acagucgaGucagaacuggu.....   | 3    | 1 | seq |
| .....acagucgacucagaaUuggu.....   | 2    | 1 | seq |
| .....acGgucgacucagaacuggu.....   | 9    | 1 | seq |
| .....acagucgacucGgaacuggu.....   | 1    | 1 | seq |
| .....Ccagucgacucagaacuggu.....   | 3    | 1 | seq |
| .....acagucgacucagaacuggC.....   | 344  | 1 | seq |
| .....acagucgacucagGacuggu.....   | 6    | 1 | seq |
| .....acagAagacucagaacuggu.....   | 1    | 1 | seq |
| .....acagucgacucagaacCggu.....   | 6    | 1 | seq |
| .....acagucgacCcagaacuggu.....   | 7    | 1 | seq |
| .....acagucgacucagaacugCu.....   | 5    | 1 | seq |
| .....acagucgacucagaacugUu.....   | 7    | 1 | seq |
| .....acagucgGcucagaacuggu.....   | 5    | 1 | seq |
| .....Ncagucgacucagaacuggu.....   | 1    | 1 | seq |
| .....acagCcagacucagaacuggu.....  | 9    | 1 | seq |
| .....acagucgacucagaacuggG.....   | 88   | 1 | seq |
| .....acagucgacuUagaacuggu.....   | 2    | 1 | seq |
| .....acagucgacucagaacuggu.....   | 2227 | 0 | seq |
| .....acagucgacucagaacAggu.....   | 3    | 1 | seq |
| .....Ucagucgacucagaacuggu.....   | 1    | 1 | seq |
| .....acaguAagacucagaacuggu.....  | 2    | 1 | seq |
| .....acagucgacucagGacuggua.....  | 67   | 1 | seq |
| .....acagucgCcucagaacuggua.....  | 1    | 1 | seq |
| .....acagucgacucGgaacuggua.....  | 53   | 1 | seq |
| .....acagucgacAacagaacuggua..... | 6    | 1 | seq |
| .....acagucCacucagaacuggua.....  | 1    | 1 | seq |
| .....acagucgacucagaacugguC.....  | 18   | 1 | seq |
| .....acagucgacucagaacugCua.....  | 2    | 1 | seq |
| .....Ucagucgacucagaacuggua.....  | 24   | 1 | seq |
| .....acaguAagacucagaacuggua..... | 3    | 1 | seq |
| .....acagucgacucagaacuUgua.....  | 2    | 1 | seq |
| .....acagucgacucagaacugguU.....  | 70   | 1 | seq |
| .....acagCcagacucagaacuggua..... | 39   | 1 | seq |
| .....acagucgacucagaacuCgua.....  | 1    | 1 | seq |
| .....acagucgacucagaaUuggua.....  | 12   | 1 | seq |
| .....acagucgacucGagaacuggua..... | 7    | 1 | seq |
| .....acagucgacucagaaAuggua.....  | 2    | 1 | seq |
| .....acagucgacucagaacugguG.....  | 255  | 1 | seq |
| .....Ccagucgacucagaacuggua.....  | 45   | 1 | seq |
| .....acagucgacucaCaacuggua.....  | 2    | 1 | seq |
| .....acagucgacucaUaacuggua.....  | 5    | 1 | seq |
| .....acagGcagacucagaacuggua..... | 5    | 1 | seq |
| .....Gcagucgacucagaacuggua.....  | 86   | 1 | seq |
| .....acagucgacucagaacugAua.....  | 22   | 1 | seq |
| .....acagucgUcucagaacuggua.....  | 9    | 1 | seq |
| .....acagucgacucagaacAggua.....  | 8    | 1 | seq |
| .....acCgucgacucagaacuggua.....  | 3    | 1 | seq |
| .....acagucgacucagaaUcuggua..... | 1    | 1 | seq |
| .....acagAagacucagaacuggua.....  | 10   | 1 | seq |
| .....acagucgacuUagaacuggua.....  | 13   | 1 | seq |
| .....acGgucgacucagaacuggua.....  | 63   | 1 | seq |
| .....acagucgaGucagaacuggua.....  | 4    | 1 | seq |
| .....acagucgGcucagaacuggua.....  | 42   | 1 | seq |
| .....acagucgacucAagaacuggua..... | 6    | 1 | seq |
| .....acagucgacucagaaGcuggua..... | 46   | 1 | seq |
| .....acagucgacucCgaacuggua.....  | 1    | 1 | seq |
| .....acagucgacucagaacuggCa.....  | 237  | 1 | seq |
| .....acagucgacucagaacugUua.....  | 5    | 1 | seq |

## Mature

## Star

uauaggacguagaauuccucucgugggggaauuuucccuagggcgguaaacagucgacucagaaacugguacagacagaaggggaaucugacuguuuaauuaaaacaagaauu

|                                   |       |   |     |
|-----------------------------------|-------|---|-----|
| .....acagucgacGcagaacuggua.....   | 2     | 1 | seq |
| .....acaguGgacucagaacuggua.....   | 1     | 1 | seq |
| .....aGagucgacucagaacuggua.....   | 1     | 1 | seq |
| .....acagucgaUucagaacuggua.....   | 10    | 1 | seq |
| .....acagucgacCcagaacuggua.....   | 36    | 1 | seq |
| .....acagucgacucagaacuggGa.....   | 65    | 1 | seq |
| .....acagucgacucagaacGggua.....   | 3     | 1 | seq |
| .....acagucgacucagaacCggua.....   | 32    | 1 | seq |
| .....acagucgacucagaagGuggua.....  | 8     | 1 | seq |
| .....acUgucgacucagaacuggua.....   | 16    | 1 | seq |
| .....acagucgacucagUacuggua.....   | 6     | 1 | seq |
| .....acagucgacucagaacuggua.....   | 19018 | 0 | seq |
| .....acagucgacucUgaacuggua.....   | 16    | 1 | seq |
| .....Ncagucgacucagaacuggua.....   | 28    | 1 | seq |
| .....acagucgacucagaacuggGaC.....  | 2     | 1 | seq |
| .....acagucgacCcagaacugguac.....  | 3     | 1 | seq |
| .....acagucgacucagaGcugguac.....  | 3     | 1 | seq |
| .....acagucgacucagaacugguUc.....  | 2     | 1 | seq |
| .....Gcagucgacucagaacugguac.....  | 4     | 1 | seq |
| .....acagucgacucagaacugUuac.....  | 4     | 1 | seq |
| .....acagucgacucagaacugguCaC..... | 5     | 1 | seq |
| .....acUgucgacucagaacugguac.....  | 1     | 1 | seq |
| .....acagucgacucagaacugguGc.....  | 8     | 1 | seq |
| .....acagucgacucagaacugguac.....  | 2     | 1 | seq |
| .....aGagucgacucagaacugguac.....  | 1     | 1 | seq |
| .....acagucgacucagaacugguac.....  | 1494  | 0 | seq |
| .....Ncagucgacucagaacugguac.....  | 4     | 1 | seq |
| .....acagucgacucagaacGgguaC.....  | 1     | 1 | seq |
| .....acagucgacucagUacugguac.....  | 2     | 1 | seq |
| .....Ucagucgacucagaacugguac.....  | 2     | 1 | seq |
| .....acagucgGcucagaacugguac.....  | 1     | 1 | seq |
| .....acGgucgacucagaacugguac.....  | 5     | 1 | seq |
| .....acagucgacucagaacCgguaC.....  | 3     | 1 | seq |
| .....acagCcgacucagaacugguac.....  | 3     | 1 | seq |
| .....acagucgacucagGacugguac.....  | 1     | 1 | seq |
| .....acagucgacucGgaacugguac.....  | 4     | 1 | seq |
| .....acagucgUcucagaacugguac.....  | 1     | 1 | seq |
| .....Ccagucgacucagaacugguac.....  | 3     | 1 | seq |
| .....acagucgacucagaacAgguac.....  | 1     | 1 | seq |
| .....acagucgacuGagaacugguac.....  | 1     | 1 | seq |
| .....acagucgacucagaacugguaA.....  | 10    | 1 | seq |
| .....acagucgacucagaauUugguac..... | 2     | 1 | seq |
| .....acagucgacuAgaacugguac.....   | 1     | 1 | seq |
| .....acagucgacucagaacuUguac.....  | 1     | 1 | seq |
| .....acagAcgacucagaacugguac.....  | 1     | 1 | seq |
| .....acagucgacucagaacCgguaCa..... | 2     | 1 | seq |
| .....acagucgacucagaCcugguaca..... | 1     | 1 | seq |
| .....acagucgacucUgaacugguaca..... | 4     | 1 | seq |
| .....acagucgacucagGacugguaca..... | 3     | 1 | seq |
| .....acagucgacucagUacugguaca..... | 2     | 1 | seq |
| .....acagucgacuUagaacugguaca..... | 1     | 1 | seq |
| .....Ccagucgacucagaacugguaca..... | 1     | 1 | seq |
| .....acagucgacucagaacuggCaca..... | 4     | 1 | seq |
| .....acGgucgacucagaacugguaca..... | 4     | 1 | seq |
| .....acagucgacucagaaUugguaca..... | 3     | 1 | seq |
| .....acagAcgacucagaacugguaca..... | 1     | 1 | seq |
| .....acagucgacuGagaacugguaca..... | 2     | 1 | seq |
| .....acagucgacCcagaacugguaca..... | 1     | 1 | seq |
| .....acagucgacucagaacugguaca..... | 1082  | 0 | seq |
| .....acagucgacucagaacugguacU..... | 79    | 1 | seq |
| .....acagucgacucagaacugAuaCa..... | 1     | 1 | seq |
| .....acagucgacucagaGcugguaca..... | 2     | 1 | seq |
| .....acagucgacucagaacuggGaCa..... | 1     | 1 | seq |
| .....acagucgGcucagaacugguaca..... | 3     | 1 | seq |
| .....acagucgaGucagaacugguaca..... | 1     | 1 | seq |
| .....acagucgacucagaacugUuaca..... | 1     | 1 | seq |
| .....aUagucgacucagaacugguaca..... | 4     | 1 | seq |
| .....acagucgacucagaacAgguaca..... | 1     | 1 | seq |
| .....acagucgacucagaacugguGa.....  | 1     | 1 | seq |
| .....acagucgacucagaacugguacC..... | 61    | 1 | seq |

## Mature

## Star

uauggacguagaauuguccucucgugggggaauuuuccuagcgguaaacagucgacucagaaacugguacagacaaaggggaucugacuguuuaauuaaaacaaagaauu

|                                                     |     |   |     |
|-----------------------------------------------------|-----|---|-----|
| .....acagucgacucGgaacugguaca.....                   | 2   | 1 | seq |
| .....Ncagucgacucagaacugguaca.....                   | 1   | 1 | seq |
| .....acagCcagucacagaacugguaca.....                  | 1   | 1 | seq |
| .....Gcagucgacucagaacugguaca.....                   | 4   | 1 | seq |
| .....acagucgUcucagaacugguaca.....                   | 1   | 1 | seq |
| .....acagucgacucagaacuggAaca.....                   | 2   | 1 | seq |
| .....acagucgacucagaacugguGca.....                   | 10  | 1 | seq |
| .....acUgucgacucagaacugguaca.....                   | 2   | 1 | seq |
| .....acaCucgacucagaacugguaca.....                   | 1   | 1 | seq |
| .....acagucgacucCgaacugguacag.....                  | 1   | 1 | seq |
| .....acagucgacucagaacugguacUg.....                  | 21  | 1 | seq |
| .....acagucgacucagaacugguacaC.....                  | 4   | 1 | seq |
| .....Ccagucgacucagaacugguacag.....                  | 1   | 1 | seq |
| .....acagucgGcucagaacugguacag.....                  | 2   | 1 | seq |
| .....Gcagucgacucagaacugguacag.....                  | 2   | 1 | seq |
| .....acagucgacucagaacCgguacag.....                  | 1   | 1 | seq |
| .....acagucAacucagaacugguacag.....                  | 1   | 1 | seq |
| .....acagucgacucGgaacugguacag.....                  | 2   | 1 | seq |
| .....acagucgacucagaacugguacCg.....                  | 41  | 1 | seq |
| .....acagucgacucagUacugguacag.....                  | 1   | 1 | seq |
| .....acagucgacucagaacugguGcacag.....                | 1   | 1 | seq |
| .....acagucgacucagaacugguacaA.....                  | 10  | 1 | seq |
| .....Ncagucgacucagaacugguacag.....                  | 1   | 1 | seq |
| .....acagucgacucagaacugguacaU.....                  | 1   | 1 | seq |
| .....acGgucgacucagaacugguacag.....                  | 1   | 1 | seq |
| .....Ucagucgacucagaacugguacag.....                  | 1   | 1 | seq |
| .....acaUucgacucagaacugguacag.....                  | 1   | 1 | seq |
| .....acagucgacucagaacugguacag.....                  | 309 | 0 | seq |
| .....acagucgacucagaGcuugguacaga.....                | 1   | 1 | seq |
| .....acagucgacucagaacugguacagU.....                 | 1   | 1 | seq |
| .....acagucgacucagaacugguacaga.....                 | 32  | 0 | seq |
| .....acagucgacucagaacugguacagG.....                 | 1   | 1 | seq |
| .....acagucgacucagaacugguacUga.....                 | 7   | 1 | seq |
| .....acagucgacucagaacugguGcaga.....                 | 1   | 1 | seq |
| .....aUagucgacucagaacugguacaga.....                 | 1   | 1 | seq |
| .....acagucgacucagaacugguacCga.....                 | 5   | 1 | seq |
| .....acagucgacucagaacugguacUgac.....                | 2   | 1 | seq |
| .....acagucgacucagaacugguCcagac.....                | 1   | 1 | seq |
| .....acagucgacucagaacugguacagac.....                | 6   | 0 | seq |
| .....acagucgacucagaacugguacagacG.....               | 3   | 1 | seq |
| .....acagCcagucacagaacugguacagaca.....              | 1   | 1 | seq |
| .....acagucgacucagaGcuugguacagaca.....              | 2   | 1 | seq |
| .....acagucgGcucagaacugguacagaca.....               | 1   | 1 | seq |
| .....Gcagucgacucagaacugguacagaca.....               | 1   | 1 | seq |
| .....acagucgacucagaacugguacagacU.....               | 4   | 1 | seq |
| .....acagucgacucagaacugguacUgaca.....               | 8   | 1 | seq |
| .....acagucgacucGgaacugguacagaca.....               | 1   | 1 | seq |
| .....acagucgacucagaacugguacCgaca.....               | 5   | 1 | seq |
| .....acagucgacCcagaacugguacagaca.....               | 1   | 1 | seq |
| .....acagucgacucagaacugguacagaca.....               | 110 | 0 | seq |
| .....acagAcgacucagaacugguacagacaa.....              | 1   | 1 | seq |
| .....acagucgacucagaacugguacagacaa.....              | 4   | 0 | seq |
| .....acGgucgacucagaacugguacagacaa.....              | 1   | 1 | seq |
| .....acagucgacucagaacugguacUgacaag.....             | 3   | 1 | seq |
| .....acagucgacucagaacugguacagacaag.....             | 5   | 0 | seq |
| .....acagucgacucagaacugguacagacaagggg.....          | 7   | 0 | seq |
| .....acagucgacucagaacugguCacagacaagggg.....         | 1   | 1 | seq |
| .....acagucgacucagaacugguacUgacaagggg.....          | 1   | 1 | seq |
| .....acagucgacucagaacugguacagacaGgggg.....          | 1   | 1 | seq |
| .....Ucagucgacucagaacugguacagacaagggg.....          | 1   | 1 | seq |
| .....acagucgacucagaacugguacagacaaggAg.....          | 1   | 1 | seq |
| .....acagucgacucagaacugguacagacaaggggG.....         | 1   | 1 | seq |
| .....acagucgacucagaacugguacagacaaggggaa.....        | 2   | 0 | seq |
| .....acagucgacucagaacugguacagacaaggggaauU.....      | 1   | 1 | seq |
| .....acagucgacucagaacugguacUgacaaggggaauC.....      | 1   | 1 | seq |
| .....acagucgacucagaacugguacagacaaggggaauC.....      | 3   | 0 | seq |
| .....acagucgacucagaacugguacGgacaaggggaauC.....      | 197 | 1 | seq |
| .....acagucgacucagaacugguacUgacaaggggaauCug.....    | 1   | 1 | seq |
| .....acagucgacucagaacugguacGgacaaggggaauCug.....    | 18  | 1 | seq |
| .....acagucgacucagaacugguacGgacaaggggaauCugacu..... | 5   | 1 | seq |



## Mature

## Star

uauaggacguagaauuguccucucgugggggaauuuucccuagggcgguagaa

|                                                         |        |   |     |
|---------------------------------------------------------|--------|---|-----|
| .....acagucgacucagaacugguacGgacaaggggaucugacug.....     | 4      | 1 | seq |
| .....acagucgacucagaacugguacGgacaaggggaucugacuguu.....   | 4      | 1 | seq |
| .....acagucgacucagaacugguacGgacaaggggaucugacuguu.....   | 1      | 1 | seq |
| .....acagucgacucagaacugguacGgacaaggggaucugacuguuua..... | 4      | 1 | seq |
| .....caguAgacucagaacug.....                             | 27     | 1 | seq |
| .....cagucgacucagGacug.....                             | 532    | 1 | seq |
| .....cagAcgacucagaacug.....                             | 71     | 1 | seq |
| .....cagucgCcucagaacug.....                             | 20     | 1 | seq |
| .....cagCcagacucagaacug.....                            | 348    | 1 | seq |
| .....cagucgacuaAgaacug.....                             | 10     | 1 | seq |
| .....cagucgaGucagaacug.....                             | 5      | 1 | seq |
| .....cagucgacucagaacug.....                             | 161048 | 0 | seq |
| .....cagucCacucagaacug.....                             | 8      | 1 | seq |
| .....Gagucgacucagaacug.....                             | 263    | 1 | seq |
| .....cagucgacucagaaGug.....                             | 41     | 1 | seq |
| .....cagucgacucagaacCg.....                             | 1372   | 1 | seq |
| .....cagucgacucagaacuU.....                             | 1017   | 1 | seq |
| .....cagucgacucGgaacug.....                             | 478    | 1 | seq |
| .....cagucgacucaUaacug.....                             | 10     | 1 | seq |
| .....cagucgacucagaacAg.....                             | 668    | 1 | seq |
| .....cagucgacCgagaacug.....                             | 77     | 1 | seq |
| .....cagucgacuUagaacug.....                             | 80     | 1 | seq |
| .....cagucgacucagaUcug.....                             | 27     | 1 | seq |
| .....cagucgacucagaaAug.....                             | 39     | 1 | seq |
| .....cagucgacucagaacuC.....                             | 536    | 1 | seq |
| .....cagucgacucagaacGg.....                             | 842    | 1 | seq |
| .....cNucgacucagaacug.....                              | 2      | 1 | seq |
| .....cagucgacuNagaacug.....                             | 1      | 1 | seq |
| .....cagucgGcucagaacug.....                             | 419    | 1 | seq |
| .....cagucgacucagaaUug.....                             | 334    | 1 | seq |
| .....cagucgacucagaCucug.....                            | 16     | 1 | seq |
| .....cagucgacucCgaacug.....                             | 41     | 1 | seq |
| .....cUgucgacucagaacug.....                             | 159    | 1 | seq |
| .....cagucgacucUgaacug.....                             | 112    | 1 | seq |
| .....cCgucgacucagaacug.....                             | 31     | 1 | seq |
| .....cagucgacNcagaacug.....                             | 1      | 1 | seq |
| .....caguGgacucagaacug.....                             | 26     | 1 | seq |
| .....cGgucgacucagaacug.....                             | 403    | 1 | seq |
| .....cagCcagacucagaacug.....                            | 47     | 1 | seq |
| .....cagucgacuGagaacug.....                             | 7      | 1 | seq |
| .....cagucgacCcagaacug.....                             | 406    | 1 | seq |
| .....cagucgacAcagaacug.....                             | 77     | 1 | seq |
| .....Nagucgacucagaacug.....                             | 234    | 1 | seq |
| .....cagucgaUucagaacug.....                             | 83     | 1 | seq |
| .....cagucgacucagCacug.....                             | 25     | 1 | seq |
| .....cagucgacucagUacug.....                             | 80     | 1 | seq |
| .....cagucgacucagaacugg.....                            | 17430  | 0 | seq |
| .....cagucgCcucagaacugg.....                            | 1      | 1 | seq |
| .....cagucgacucCgaacugg.....                            | 5      | 1 | seq |
| .....cagucgacucagaacugC.....                            | 111    | 1 | seq |
| .....cagucgGcucagaacugg.....                            | 43     | 1 | seq |
| .....cagucgacucagaCcugg.....                            | 4      | 1 | seq |
| .....cagucgaUucagaacugg.....                            | 11     | 1 | seq |
| .....cagAcgacucagaacugg.....                            | 8      | 1 | seq |
| .....cagucgacucagaacugA.....                            | 1201   | 1 | seq |
| .....caguGgacucagaacugg.....                            | 1      | 1 | seq |
| .....cagucgacucUgaacugg.....                            | 7      | 1 | seq |
| .....cagucgacucagaaGugg.....                            | 3      | 1 | seq |
| .....cagucgacucagaacCgg.....                            | 73     | 1 | seq |
| .....cagucgacucagaaAug.....                             | 3      | 1 | seq |
| .....cagucgacucGgaacugg.....                            | 57     | 1 | seq |
| .....cagucgacucagaacAgg.....                            | 12     | 1 | seq |
| .....cagucgacucagGacugg.....                            | 60     | 1 | seq |
| .....cagucgacucagaacuCg.....                            | 20     | 1 | seq |
| .....cagucgacucagaacGgg.....                            | 39     | 1 | seq |
| .....cagucgacCcagaacugg.....                            | 35     | 1 | seq |
| .....cGgucgacucagaacugg.....                            | 39     | 1 | seq |
| .....cagucgacucagaaUugg.....                            | 16     | 1 | seq |
| .....Gagucgacucagaacugg.....                            | 25     | 1 | seq |
| .....cagucgacucagUacugg.....                            | 4      | 1 | seq |

## Mature

## Star

uauaggacguagaauguccucucgugggggaauuuuccuagggcgguagaacagucgacucagagaacugguacagacaaggggaucugacuguuuaauuaaaacaagaauu

|                         |      |   |     |
|-------------------------|------|---|-----|
| .cagucgacucagCacugg.    | 3    | 1 | seq |
| .cagucgacuUagaacugg.    | 13   | 1 | seq |
| .cagucgacACagaacugg.    | 4    | 1 | seq |
| .cagucgacuaUaacugg.     | 1    | 1 | seq |
| .cagucgacuAagaacugg.    | 1    | 1 | seq |
| .cagucgacGcagaacugg.    | 10   | 1 | seq |
| .cGucgacucagaacugg.     | 1    | 1 | seq |
| .cagucgacucagaacugU.    | 186  | 1 | seq |
| .cagGcagacucagaacugg.   | 5    | 1 | seq |
| .cagucgacucagaacuUg.    | 18   | 1 | seq |
| .cagucgacucagaUcugg.    | 4    | 1 | seq |
| .cUucgacucagaacugg.     | 13   | 1 | seq |
| .Nagucgacucagaacugg.    | 18   | 1 | seq |
| .cagCcgacucagaacugg.    | 43   | 1 | seq |
| .cagucgacucuaUaacuggu.  | 1    | 1 | seq |
| .cagucgCcucagaacuggu.   | 2    | 1 | seq |
| .cagucgacACagaacuggu.   | 2    | 1 | seq |
| .cagucgacuUagaacuggu.   | 1    | 1 | seq |
| .cagucgacucagaaGuggu.   | 4    | 1 | seq |
| .cagucgacucagaacuggG.   | 191  | 1 | seq |
| .cagucgacucagaacuggu.   | 5583 | 0 | seq |
| .cagCcgacucagaacuggu.   | 13   | 1 | seq |
| .cagucgacucagaacugAu.   | 15   | 1 | seq |
| .cagucgacucagCacuggu.   | 1    | 1 | seq |
| .cagucgacucagaacuUgu.   | 3    | 1 | seq |
| .cagucgacucagaaUuggu.   | 4    | 1 | seq |
| .Nagucgacucagaacuggu.   | 6    | 1 | seq |
| .cagucgacucagaacugCu.   | 10   | 1 | seq |
| .cagucgaUucagaacuggu.   | 6    | 1 | seq |
| .cUucgacucagaacuggu.    | 5    | 1 | seq |
| .cagGcgacucagaacuggu.   | 1    | 1 | seq |
| .caguGgacucagaacuggu.   | 3    | 1 | seq |
| .Gagucgacucagaacuggu.   | 11   | 1 | seq |
| .cagucgacucagGacuggu.   | 12   | 1 | seq |
| .cagucgacucagaUcuggu.   | 1    | 1 | seq |
| .cagucgacucGgaacuggu.   | 3    | 1 | seq |
| .cagucgacucagaacAggu.   | 4    | 1 | seq |
| .cagucgacuGagaacuggu.   | 1    | 1 | seq |
| .caguAgacucagaacuggu.   | 1    | 1 | seq |
| .cagucgacucagaaAuggu.   | 1    | 1 | seq |
| .cagucgacucagaacuCgu.   | 1    | 1 | seq |
| .cagucgacucGgaacuggu.   | 2    | 1 | seq |
| .cagucgacucagaacCggu.   | 10   | 1 | seq |
| .cagucgacucagUacuggu.   | 1    | 1 | seq |
| .cGgucgacucagaacuggu.   | 19   | 1 | seq |
| .cagucgacucagaacugUu.   | 3    | 1 | seq |
| .cagucgacucGgaacuggu.   | 18   | 1 | seq |
| .cagucgacucagaacuggC.   | 800  | 1 | seq |
| .cagucgacCcagaacuggu.   | 15   | 1 | seq |
| .cagucgacucagaacGggu.   | 7    | 1 | seq |
| .cagucgGcucagaacuggu.   | 16   | 1 | seq |
| .cagACgacucagaacuggu.   | 4    | 1 | seq |
| .cagucgacucagaaGuggua.  | 9    | 1 | seq |
| .cagucgacucagaGcuggua.  | 103  | 1 | seq |
| .cagucgacucagaacugCua.  | 10   | 1 | seq |
| .cagucgacucagaacAggua.  | 25   | 1 | seq |
| .cagucgacucaCaacuggua.  | 3    | 1 | seq |
| .cagucgacucagaacCggua.  | 95   | 1 | seq |
| .cagCcagacucagaacuggua. | 108  | 1 | seq |
| .cagucgacucGgaacuggua.  | 12   | 1 | seq |
| .cagucgCcucagaacuggua.  | 4    | 1 | seq |
| .cGgucgacucagaacuggua.  | 110  | 1 | seq |
| .cagucgacACagaacuggua.  | 19   | 1 | seq |
| .cagucgacucagaaAuggua.  | 4    | 1 | seq |
| .cagucgacGcagaacuggua.  | 31   | 1 | seq |
| .cagucgacucagaacuggGa.  | 135  | 1 | seq |
| .cagucgacucagaacGggua.  | 28   | 1 | seq |
| .Nagucgacucagaacuggua.  | 51   | 1 | seq |
| .cagucgUcucagaacuggua.  | 9    | 1 | seq |
| .cagucgacucagaUcuggua.  | 8    | 1 | seq |

## Mature

## Star

uauggacguagaauguccucucgugggggaauuuuccuagggcgguagaa

|                                  |       |   |     |
|----------------------------------|-------|---|-----|
| .....cagucgacucUgaacuggua.....   | 36    | 1 | seq |
| .....caguGgacucagaacuggua.....   | 6     | 1 | seq |
| .....cagucgacucagaacuGgua.....   | 3     | 1 | seq |
| .....Gagucgacucagaacuggua.....   | 50    | 1 | seq |
| .....cagucgacucagaacuUgua.....   | 6     | 1 | seq |
| .....cagucgacucaUaacuggua.....   | 8     | 1 | seq |
| .....cagucCacucagaacuggua.....   | 2     | 1 | seq |
| .....cagucgaGucagaacuggua.....   | 1     | 1 | seq |
| .....cagucgacucagaacuggua.....   | 41505 | 0 | seq |
| .....cagucgacucAagaacuggua.....  | 1     | 1 | seq |
| .....cagucgacCcagaacuggua.....   | 107   | 1 | seq |
| .....cagucgacucagGacuggua.....   | 130   | 1 | seq |
| .....cagucgacucUagaacuggua.....  | 21    | 1 | seq |
| .....cagucgacucagaacugguG.....   | 681   | 1 | seq |
| .....cagucgacucGgaacuggua.....   | 136   | 1 | seq |
| .....cagucgGcucagaacuggua.....   | 115   | 1 | seq |
| .....cagucgacucagaacuggCa.....   | 462   | 1 | seq |
| .....cagAcgacucagaacuggua.....   | 30    | 1 | seq |
| .....cagucgacucagaacugguU.....   | 127   | 1 | seq |
| .....cagucgacucagaaUuggua.....   | 27    | 1 | seq |
| .....cagucgacucagUaacuggua.....  | 21    | 1 | seq |
| .....cagucgacucagaCcuggua.....   | 5     | 1 | seq |
| .....cagucgacucagaacugguC.....   | 39    | 1 | seq |
| .....cagGcgacucagaacuggua.....   | 11    | 1 | seq |
| .....cagucgacucagaacugAua.....   | 27    | 1 | seq |
| .....cUgucgacucagaacuggua.....   | 37    | 1 | seq |
| .....cagucgaUucagaacuggua.....   | 26    | 1 | seq |
| .....cagucgacucGagaacuggua.....  | 1     | 1 | seq |
| .....cagucgacucagCacuggua.....   | 3     | 1 | seq |
| .....cagucgacucagaacugUua.....   | 2     | 1 | seq |
| .....cGgucgacucagaacuggua.....   | 13    | 1 | seq |
| .....caguAgaucagaacuggua.....    | 12    | 1 | seq |
| .....cagucgacucagaacugguCC.....  | 3     | 1 | seq |
| .....Nagucgacucagaacugguac.....  | 3     | 1 | seq |
| .....cagucgacucagaacCgguaC.....  | 1     | 1 | seq |
| .....cagucgacucagaacugguaA.....  | 13    | 1 | seq |
| .....cagucgacucagaacugguaG.....  | 12    | 1 | seq |
| .....cagucgacucaUaacugguac.....  | 1     | 1 | seq |
| .....cagucgacucagaacugUuac.....  | 2     | 1 | seq |
| .....cagucgacucagaaUugguac.....  | 2     | 1 | seq |
| .....cagucgacucagaGcugguac.....  | 7     | 1 | seq |
| .....Gagucgacucagaacugguac.....  | 2     | 1 | seq |
| .....cagucgacucagaacugguac.....  | 1521  | 0 | seq |
| .....cagucgacucagGacugguac.....  | 4     | 1 | seq |
| .....cagucgacucGgaacugguac.....  | 1     | 1 | seq |
| .....cagucgaUucagaacugguac.....  | 2     | 1 | seq |
| .....cagucgacucagaacugAuaC.....  | 1     | 1 | seq |
| .....cagucgGcucagaacugguac.....  | 1     | 1 | seq |
| .....cagucgacucagUacugguac.....  | 1     | 1 | seq |
| .....cagAcgacucagaacugguac.....  | 2     | 1 | seq |
| .....cagCcgacucagaacugguac.....  | 5     | 1 | seq |
| .....cagucgacucUgaacugguac.....  | 1     | 1 | seq |
| .....cagucgacucGgaacugguac.....  | 8     | 1 | seq |
| .....cagucgacucagaacuggCaC.....  | 6     | 1 | seq |
| .....cagucgacucagaacugguGc.....  | 5     | 1 | seq |
| .....cGgucgacucagaacugguac.....  | 7     | 1 | seq |
| .....cagucgacucagaacugguaca..... | 1382  | 0 | seq |
| .....cagucgacucagaacugguaAa..... | 1     | 1 | seq |
| .....cagucAacucagaacugguaca..... | 1     | 1 | seq |
| .....cagucgacucGgaacugguaca..... | 6     | 1 | seq |
| .....caUucgacucagaacugguaca..... | 1     | 1 | seq |
| .....Gagucgacucagaacugguaca..... | 2     | 1 | seq |
| .....cagucgacucagaacugguacU..... | 128   | 1 | seq |
| .....cagucgacucagaacugguacC..... | 89    | 1 | seq |
| .....cagucgacucUgaacugguaca..... | 1     | 1 | seq |
| .....cagucgacucagaacugguGca..... | 17    | 1 | seq |
| .....cagucgacucagaacugguaUa..... | 1     | 1 | seq |
| .....cagucgacucagaacugguCCA..... | 1     | 1 | seq |
| .....cGgucgacucagaacugguaca..... | 4     | 1 | seq |
| .....cagucgacCcagaacugguaca..... | 3     | 1 | seq |

## Mature

## Star

uauaggacguagaauuguccucucgugggggaauuuuccuagggcgugaa

|                                           |     |   |     |
|-------------------------------------------|-----|---|-----|
| .cagucgacucagaacuUguaca                   | 1   | 1 | seq |
| .cagucgacucagaacugguagA                   | 1   | 1 | seq |
| .cagucgGcucagaacugguaca                   | 3   | 1 | seq |
| .cagucgacUtagaacugguaca                   | 4   | 1 | seq |
| .cagucgacucagaacuAguaca                   | 2   | 1 | seq |
| .cagucgacucagaGcugguaca                   | 2   | 1 | seq |
| .cagucgacucagaacuCguaca                   | 1   | 1 | seq |
| .cagucgacucaUaacugguaca                   | 1   | 1 | seq |
| .cagucgacucagaacuggGaca                   | 8   | 1 | seq |
| .cagucgacucagaacuggGaca                   | 2   | 1 | seq |
| .cagCcgacucagaacugguaca                   | 5   | 1 | seq |
| .cUgucgacucagaacugguaca                   | 1   | 1 | seq |
| .cagucgacucagaacCgguaca                   | 3   | 1 | seq |
| .caAucgacucagaacugguaca                   | 1   | 1 | seq |
| .cagucgacucagaacuggAaca                   | 2   | 1 | seq |
| .Uagucgacucagaacugguaca                   | 2   | 1 | seq |
| .cagucgacucagGacugguaca                   | 3   | 1 | seq |
| .cagucgacucagaacugguacaA                  | 7   | 1 | seq |
| .cagucgacucagaacugguacag                  | 360 | 0 | seq |
| .cagucgacucGgaacugguacag                  | 2   | 1 | seq |
| .cagucgacucagaAaugguacag                  | 1   | 1 | seq |
| .Aagucgacucagaacugguacag                  | 1   | 1 | seq |
| .cagucgacucagaacugguacCg                  | 74  | 1 | seq |
| .cagucgacucagaacugguGcag                  | 2   | 1 | seq |
| .cagucgacucagaGcugguacag                  | 1   | 1 | seq |
| .cagucgacucagaacuggCacag                  | 1   | 1 | seq |
| .cagCcgacucagaacugguacag                  | 1   | 1 | seq |
| .cagGcgacucagaacugguacag                  | 1   | 1 | seq |
| .Uagucgacucagaacugguacag                  | 2   | 1 | seq |
| .Nagucgacucagaacugguacag                  | 1   | 1 | seq |
| .cagucgacucagaacugguacUg                  | 26  | 1 | seq |
| .cagucgacucagaacugguagGag                 | 1   | 1 | seq |
| .cagucgacucagaacCgguacag                  | 1   | 1 | seq |
| .cagucgacucagaacugguacaga                 | 25  | 0 | seq |
| .cagucgacucagaacugguacagG                 | 1   | 1 | seq |
| .cagucgacucagaacugguCcaga                 | 1   | 1 | seq |
| .cagucgacucagaacugguacUga                 | 11  | 1 | seq |
| .cagucgacucagaacugguacCga                 | 6   | 1 | seq |
| .cagucAacucagaacugguacaga                 | 1   | 1 | seq |
| .cagucgacucagaacugguacagac                | 4   | 0 | seq |
| .cagucgacucagaacugguacCgac                | 1   | 1 | seq |
| .cagucgacucagaacugguacUgaca               | 26  | 1 | seq |
| .cagucAacucagaacugguacagaca               | 1   | 1 | seq |
| .cagucgacucagaacugguacagagC               | 4   | 1 | seq |
| .cagucgacucagaacugguacCgaca               | 3   | 1 | seq |
| .caguUgacucagaacugguacagaca               | 1   | 1 | seq |
| .cagucgacucagaacugguacagaca               | 128 | 0 | seq |
| .cagucgacucagaacugguCcagaca               | 1   | 1 | seq |
| .cagucgacucagaacugguacagGca               | 1   | 1 | seq |
| .cagucgacucagaacCgguacagaca               | 1   | 1 | seq |
| .cagucgacucagaacugguacagacU               | 1   | 1 | seq |
| .cagucgacucagaacugguacagacaa              | 5   | 0 | seq |
| .cagucgacucagaacugguacagacaag             | 10  | 0 | seq |
| .cagucgacucagaacugguacUgacaag             | 1   | 1 | seq |
| .cagucgacucagaacugguacagacaagg            | 3   | 0 | seq |
| .cagucgacucagaacugguacagacaagggg          | 10  | 0 | seq |
| .cagucgacucagaacugguacagacaagggA          | 2   | 1 | seq |
| .cagucgacucagaacugguacagacaagUgg          | 1   | 1 | seq |
| .cagucgacucagaacugguacCgacaagggg          | 1   | 1 | seq |
| .cagucgacucagaacugguacUgacaagggg          | 2   | 1 | seq |
| .cagucgacucagaacugguacagacaagggga         | 1   | 0 | seq |
| .cagucgacucagaacugguacagacaaggggaa        | 8   | 0 | seq |
| .cagucgacucagaacugguGcagacaaggggaa        | 1   | 1 | seq |
| .cagucgacucagaacugguacUgacaaggggaa        | 2   | 1 | seq |
| .cagucgacucagaacugguacagacaaggggaauc      | 1   | 0 | seq |
| .cagucgacucagaacugguacagacaaggggaaucU     | 1   | 0 | seq |
| .cagucgacucagaacugguacGgacaaggggaaucU     | 328 | 1 | seq |
| .cagucgacucagaacugguacGgacaaggggaaucug    | 23  | 1 | seq |
| .cagucgacucagaacugguacGgacaaggggaaucugac  | 1   | 1 | seq |
| .cagucgacucagaacugguacGgacaaggggaaucugacu | 2   | 1 | seq |

## Mature

## Star

|                                                           |                                                               |   |     |  |
|-----------------------------------------------------------|---------------------------------------------------------------|---|-----|--|
| uauaggacguagaauuccucucgugggggaauuuuccuagggcgguagaa        | cagucgacucagagaacugguacagacaaggggaucugacuguuuaauuaaaacaagaauu |   |     |  |
| .....cagucgacucagagaacugguacGgacaaggggaucugacug.....      | 10                                                            | 1 | seq |  |
| .....cagucgacucagagaacugguacGgacaaggggaucugacuguu.....    | 4                                                             | 1 | seq |  |
| .....cagucgacucagagaacugguacGgacaaggggaucugacuguu.....    | 1                                                             | 1 | seq |  |
| .....cagucgacucagagaacugguacGgacaaggggaucugacuguuua.....  | 12                                                            | 1 | seq |  |
| .....cagucgacucagagaacugguacGgacaaggggaucugacuguuuaa..... | 1                                                             | 1 | seq |  |
| .....agucgacucagagaacAgg.....                             | 1                                                             | 1 | seq |  |
| .....agucgacucGagaacugg.....                              | 1                                                             | 1 | seq |  |
| .....agucgacucUgaacugg.....                               | 2                                                             | 1 | seq |  |
| .....agucgacucUagaacugg.....                              | 1                                                             | 1 | seq |  |
| .....agucgacucGgaacugg.....                               | 3                                                             | 1 | seq |  |
| .....agucgacucCgaacugg.....                               | 1                                                             | 1 | seq |  |
| .....agucgacucagagaacugU.....                             | 11                                                            | 1 | seq |  |
| .....Ngucgacucagagaacugg.....                             | 3                                                             | 1 | seq |  |
| .....agucgacucagGacugg.....                               | 5                                                             | 1 | seq |  |
| .....agucgacucagagaacugA.....                             | 74                                                            | 1 | seq |  |
| .....Ugucgacucagagaacugg.....                             | 2                                                             | 1 | seq |  |
| .....agucgacucagagaacCgg.....                             | 8                                                             | 1 | seq |  |
| .....Ggucgacucagagaacugg.....                             | 5                                                             | 1 | seq |  |
| .....agucgacucagagaacugC.....                             | 6                                                             | 1 | seq |  |
| .....agucgaUucagaacugg.....                               | 1                                                             | 1 | seq |  |
| .....agucgacucagagaacCgg.....                             | 3                                                             | 1 | seq |  |
| .....agucgacucagUacugg.....                               | 1                                                             | 1 | seq |  |
| .....agucgacCcagaacugg.....                               | 3                                                             | 1 | seq |  |
| .....Cgucgacucagagaacugg.....                             | 1                                                             | 1 | seq |  |
| .....agucgacucagagaacuUg.....                             | 2                                                             | 1 | seq |  |
| .....agCcagacucagagaacugg.....                            | 4                                                             | 1 | seq |  |
| .....agucgacucagagaacugg.....                             | 1168                                                          | 0 | seq |  |
| .....agucgGcucagagaacugg.....                             | 2                                                             | 1 | seq |  |
| .....agucgacucagagaacugCu.....                            | 2                                                             | 1 | seq |  |
| .....agucgacucagagaacuggC.....                            | 35                                                            | 1 | seq |  |
| .....agucgacucagagaacugAu.....                            | 1                                                             | 1 | seq |  |
| .....agucgacucagagaacuggG.....                            | 3                                                             | 1 | seq |  |
| .....Ngucgacucagagaacuggu.....                            | 1                                                             | 1 | seq |  |
| .....agucgacucGagaacuggu.....                             | 1                                                             | 1 | seq |  |
| .....agucgGcucagagaacuggu.....                            | 1                                                             | 1 | seq |  |
| .....agucgacucagagaacuggu.....                            | 185                                                           | 0 | seq |  |
| .....agucgacucagaaUuggu.....                              | 1                                                             | 1 | seq |  |
| .....Ugucgacucagagaacuggu.....                            | 2                                                             | 1 | seq |  |
| .....agucgacucUagaacuggu.....                             | 1                                                             | 1 | seq |  |
| .....agucgacCcagaacuggu.....                              | 1                                                             | 1 | seq |  |
| .....agucgaUucagaacuggu.....                              | 1                                                             | 1 | seq |  |
| .....agucgacucaCaacuggu.....                              | 1                                                             | 1 | seq |  |
| .....agucgacucaUaacuggua.....                             | 1                                                             | 1 | seq |  |
| .....agucgacCcagaacuggua.....                             | 5                                                             | 1 | seq |  |
| .....agucgacGcagaacuggua.....                             | 1                                                             | 1 | seq |  |
| .....agucgacucagagaacuggCa.....                           | 14                                                            | 1 | seq |  |
| .....agucgacucagagaacGggua.....                           | 1                                                             | 1 | seq |  |
| .....Ugucgacucagagaacuggua.....                           | 3                                                             | 1 | seq |  |
| .....agucgacucagagaacugguC.....                           | 2                                                             | 1 | seq |  |
| .....agucgGcucagagaacuggua.....                           | 4                                                             | 1 | seq |  |
| .....agucgacucGagaacuggua.....                            | 1                                                             | 1 | seq |  |
| .....agucgacucagagaacuggua.....                           | 1712                                                          | 0 | seq |  |
| .....agucgacucagagaacugguU.....                           | 7                                                             | 1 | seq |  |
| .....agucgacucUagaacuggua.....                            | 1                                                             | 1 | seq |  |
| .....agGcgacucagagaacuggua.....                           | 1                                                             | 1 | seq |  |
| .....agucgacucagaaUuggua.....                             | 2                                                             | 1 | seq |  |
| .....agucgacucCgaacuggua.....                             | 1                                                             | 1 | seq |  |
| .....agucgacucagagaacCggua.....                           | 3                                                             | 1 | seq |  |
| .....agucgacucagGacuggua.....                             | 3                                                             | 1 | seq |  |
| .....agucgacucUgaacuggua.....                             | 2                                                             | 1 | seq |  |
| .....agCcagacucagagaacuggua.....                          | 5                                                             | 1 | seq |  |
| .....agucgacucGgaacuggua.....                             | 4                                                             | 1 | seq |  |
| .....agucgacucagagaacugUua.....                           | 1                                                             | 1 | seq |  |
| .....agAcgacucagagaacuggua.....                           | 1                                                             | 1 | seq |  |
| .....Ngucgacucagagaacuggua.....                           | 2                                                             | 1 | seq |  |
| .....agucgacucagagaacugAua.....                           | 1                                                             | 1 | seq |  |
| .....Cgucgacucagagaacuggua.....                           | 1                                                             | 1 | seq |  |
| .....agucgacucagagaGcuggua.....                           | 4                                                             | 1 | seq |  |
| .....agucgacucagagaacugguG.....                           | 33                                                            | 1 | seq |  |
| .....agucgacucagagaCcuggua.....                           | 1                                                             | 1 | seq |  |

## Mature

## Star

uauggacguagaauguccucucgugggggaauuuucccuagcgguagaaagucgacucagaaacugguacagacaaaggggaucugacuguuuaauaaaacaagaauu

|                                                    |      |   |     |
|----------------------------------------------------|------|---|-----|
| .....agucgacucagaacuggGa.....                      | 5    | 1 | seq |
| .....Ggucgacucagaacuggua.....                      | 6    | 1 | seq |
| .....agucgacucGgaacuggguac.....                    | 1    | 1 | seq |
| .....agucgacucagaacuggguac.....                    | 111  | 0 | seq |
| .....agucgacucagaacuggguGc.....                    | 2    | 1 | seq |
| .....agucgacucagaacuggguacU.....                   | 6    | 1 | seq |
| .....agCcgacucagaacuggguaca.....                   | 1    | 1 | seq |
| .....agucgacucagaacuggguacC.....                   | 3    | 1 | seq |
| .....agucgacucagaacuggguGca.....                   | 1    | 1 | seq |
| .....agucUacucagaacuggguaca.....                   | 1    | 1 | seq |
| .....agucgacucagaacuggguaca.....                   | 76   | 0 | seq |
| .....agucgacucagaacuggguacUg.....                  | 1    | 1 | seq |
| .....agucgacucagGacuggguacag.....                  | 1    | 1 | seq |
| .....agucgacucagaacuggguacag.....                  | 5    | 0 | seq |
| .....agucgacucagaacuggguacagaga.....               | 1    | 0 | seq |
| .....agucgacucagaacuggguacUga.....                 | 1    | 1 | seq |
| .....agucgacucagaacuggguacagaca.....               | 1    | 0 | seq |
| .....agucgacucagaacuggguacagacG.....               | 1    | 1 | seq |
| .....agucgacucagaacuggguacagacaag.....             | 1    | 0 | seq |
| .....agucgacucagaacuggguacGgacaaggggaauuc.....     | 6    | 1 | seq |
| .....agucgacucagaacuggguacGgacaaggggaucugacug..... | 3    | 1 | seq |
| .....gucgacucagaacuggG.....                        | 4    | 1 | seq |
| .....gucgacucagaacuggG.....                        | 21   | 1 | seq |
| .....gucgacucagaacugggu.....                       | 139  | 0 | seq |
| .....gCcgacucagaacugggu.....                       | 1    | 1 | seq |
| .....gucgacucagaacugAu.....                        | 1    | 1 | seq |
| .....gucgacCcagaacuggua.....                       | 4    | 1 | seq |
| .....gucgacuUagaacuggua.....                       | 2    | 1 | seq |
| .....gucgGcucagaacuggua.....                       | 2    | 1 | seq |
| .....gucgacucagaacuggguC.....                      | 3    | 1 | seq |
| .....gAcgacucagaacuggua.....                       | 2    | 1 | seq |
| .....gucgacAcagaacuggua.....                       | 1    | 1 | seq |
| .....gucgacucagaacuggguU.....                      | 7    | 1 | seq |
| .....gucgacucagaacuggguG.....                      | 19   | 1 | seq |
| .....gucgacucagaCcuuggua.....                      | 1    | 1 | seq |
| .....gucgacucagaacugAu.....                        | 1    | 1 | seq |
| .....gCcgacucagaacuggua.....                       | 11   | 1 | seq |
| .....gucgacucagaacCggu.....                        | 2    | 1 | seq |
| .....gucgacucUgaacuggua.....                       | 2    | 1 | seq |
| .....gucgacucagaacuggua.....                       | 1853 | 0 | seq |
| .....gucgacucGgaacuggua.....                       | 8    | 1 | seq |
| .....Nucgacucagaacuggua.....                       | 2    | 1 | seq |
| .....gucgacucagaGcuuggua.....                      | 1    | 1 | seq |
| .....gucgacucagGacuggua.....                       | 4    | 1 | seq |
| .....gucgacucagaacuggCa.....                       | 22   | 1 | seq |
| .....gucgacucagaaUuggua.....                       | 1    | 1 | seq |
| .....gucgacucagaacuggGa.....                       | 3    | 1 | seq |
| .....gucgacucagUacuggua.....                       | 1    | 1 | seq |
| .....gucgacucagaacuggguac.....                     | 84   | 0 | seq |
| .....gucgacucagaCcuugguac.....                     | 1    | 1 | seq |
| .....gucgacucagaacuggguGc.....                     | 1    | 1 | seq |
| .....gucgacucagaacuggguacC.....                    | 2    | 1 | seq |
| .....gucgacucagaacuggguaca.....                    | 67   | 0 | seq |
| .....Cucgacucagaacuggguaca.....                    | 1    | 1 | seq |
| .....gucgacucagaacuggguacU.....                    | 2    | 1 | seq |
| .....gucgacucagaacGgguaca.....                     | 1    | 1 | seq |
| .....gucgacucagaacCgguaca.....                     | 1    | 1 | seq |
| .....gucgacuUagaacugguaca.....                     | 1    | 1 | seq |
| .....gucgacucagaacuggguacag.....                   | 3    | 0 | seq |
| .....gucgacucagaacuggguacCg.....                   | 1    | 1 | seq |
| .....Acgacucagaacuggguacag.....                    | 1    | 1 | seq |
| .....gucgacucagaacuggguacaga.....                  | 1    | 0 | seq |
| .....gucgacucagaacuggguacUgaca.....                | 1    | 1 | seq |
| .....gucgacucagaacuggguacagaca.....                | 4    | 0 | seq |
| .....gucgacucagaacuggguacagacaagggg.....           | 1    | 0 | seq |
| .....gucgacucagaacuggguacGgacaaggggaauuc.....      | 6    | 1 | seq |
| .....uAgacucagaacuggua.....                        | 9    | 1 | seq |
| .....ucgacucagaaUuggua.....                        | 1    | 1 | seq |
| .....ucgacucagaaUuggua.....                        | 28   | 1 | seq |
| .....ucgacGcagaacuggua.....                        | 9    | 1 | seq |

## Mature

## Star

|                                                   |                                                                |       |   |     |
|---------------------------------------------------|----------------------------------------------------------------|-------|---|-----|
| uauaggacguagaauguccucucgugggggauuuucccuagggcgguaa | cagucgacucagagaacugguacagacaaggggaaucugacuguuuaauaaaaacaagaauu |       |   |     |
| .ucgacucagaacCgguu                                |                                                                | 121   | 1 | seq |
| .ucgCcucagaacugguu                                |                                                                | 3     | 1 | seq |
| .ucgacucagaacAgguu                                |                                                                | 28    | 1 | seq |
| .ucgacucGagaacugguu                               |                                                                | 1     | 1 | seq |
| .ucgacucagaacugCua                                |                                                                | 12    | 1 | seq |
| .ucgacucCaacugguu                                 |                                                                | 4     | 1 | seq |
| .ucgGcucagaacugguu                                |                                                                | 155   | 1 | seq |
| .ucgacucagaacugAua                                |                                                                | 40    | 1 | seq |
| .Ccgaucagaacugguu                                 |                                                                | 179   | 1 | seq |
| .ucgacucagaacugguC                                |                                                                | 51    | 1 | seq |
| .ucgaGucagaacugguu                                |                                                                | 10    | 1 | seq |
| .ucgacucagaacugGc                                 |                                                                | 179   | 1 | seq |
| .ucgacucUgaacugguu                                |                                                                | 28    | 1 | seq |
| .ucgacAcagaacugguu                                |                                                                | 24    | 1 | seq |
| .ucgacucCgaacugguu                                |                                                                | 13    | 1 | seq |
| .ucgaUucagaacugguu                                |                                                                | 31    | 1 | seq |
| .uGgacucagaacugguu                                |                                                                | 6     | 1 | seq |
| .ucgacucagaacGgguu                                |                                                                | 32    | 1 | seq |
| .ucgacCcagaacugguu                                |                                                                | 140   | 1 | seq |
| .ucgacucagUacugguu                                |                                                                | 29    | 1 | seq |
| .ucgacuUagaacugguu                                |                                                                | 38    | 1 | seq |
| .uNgacucagaacugguu                                |                                                                | 2     | 1 | seq |
| .Acgacucagaacugguu                                |                                                                | 64    | 1 | seq |
| .ucgacucagaacugUua                                |                                                                | 23    | 1 | seq |
| .Ncgacucagaacugguu                                |                                                                | 85    | 1 | seq |
| .ucgacucagCacugguu                                |                                                                | 9     | 1 | seq |
| .ucgacucagaacugguU                                |                                                                | 206   | 1 | seq |
| .ucgacucagGacugguu                                |                                                                | 169   | 1 | seq |
| .ucgacucagaacugguu                                |                                                                | 56525 | 0 | seq |
| .ucgacucagaUcugguu                                |                                                                | 7     | 1 | seq |
| .ucgacucagaacuCguu                                |                                                                | 4     | 1 | seq |
| .ucgUcucagaacugguu                                |                                                                | 27    | 1 | seq |
| .ucgacucagaacugguG                                |                                                                | 864   | 1 | seq |
| .ucgacuAagaacugguu                                |                                                                | 1     | 1 | seq |
| .ucgacucagaAGugguu                                |                                                                | 1     | 1 | seq |
| .ucgacucagaacugGCa                                |                                                                | 586   | 1 | seq |
| .Gcgacucagaacugguu                                |                                                                | 79    | 1 | seq |
| .ucgacucagaGcugguu                                |                                                                | 173   | 1 | seq |
| .ucgacucGgaacugguu                                |                                                                | 155   | 1 | seq |
| .ucgacucagaacuUguu                                |                                                                | 11    | 1 | seq |
| .ucgacucagaCcugguu                                |                                                                | 3     | 1 | seq |
| .ucgacucagGacugguac                               |                                                                | 1     | 1 | seq |
| .Gcgacucagaacugguac                               |                                                                | 1     | 1 | seq |
| .ucgacucUgaacugguac                               |                                                                | 1     | 1 | seq |
| .ucgacucagaacuCguac                               |                                                                | 1     | 1 | seq |
| .ucgacucagaacGgguaC                               |                                                                | 1     | 1 | seq |
| .ucgUcucagaacugguac                               |                                                                | 1     | 1 | seq |
| .Ncgacucagaacugguac                               |                                                                | 2     | 1 | seq |
| .ucgGcucagaacugguac                               |                                                                | 5     | 1 | seq |
| .ucgacucagaacuUguac                               |                                                                | 1     | 1 | seq |
| .ucgacucagaacugguAA                               |                                                                | 19    | 1 | seq |
| .ucgacucagaacugGac                                |                                                                | 1     | 1 | seq |
| .ucgacucagaacugguac                               |                                                                | 1670  | 0 | seq |
| .ucgacucagaacugGCaC                               |                                                                | 2     | 1 | seq |
| .ucgacCcagaacugguac                               |                                                                | 2     | 1 | seq |
| .ucgacucagaacugguAG                               |                                                                | 11    | 1 | seq |
| .ucgaGucagaacugguac                               |                                                                | 1     | 1 | seq |
| .ucgacucagaacugguUc                               |                                                                | 2     | 1 | seq |
| .ucgacucCgaacugguac                               |                                                                | 1     | 1 | seq |
| .ucgacucagaGcugguac                               |                                                                | 8     | 1 | seq |
| .ucgacucagaacAgguac                               |                                                                | 2     | 1 | seq |
| .ucgacucagaacugguCc                               |                                                                | 1     | 1 | seq |
| .Ccgaucagaacugguac                                |                                                                | 2     | 1 | seq |
| .ucgacucGgaacugguac                               |                                                                | 8     | 1 | seq |
| .ucgacucagaacCgguaC                               |                                                                | 6     | 1 | seq |
| .ucgacucagaacugguGc                               |                                                                | 9     | 1 | seq |
| .ucAacucagaacugguaca                              |                                                                | 2     | 1 | seq |
| .uAgaucagaacugguaca                               |                                                                | 1     | 1 | seq |
| .ucgacCcagaacugguaca                              |                                                                | 6     | 1 | seq |
| .ucgacuUagaacugguaca                              |                                                                | 1     | 1 | seq |

## Mature

## Star

uauggacguagaauuccucucgugggggaauuuucccuagggcgugaacagucgacucagagaacugguuacagacaaggggaucugacuguuuaauuaaaacaagaauu

|                                        |      |   |     |
|----------------------------------------|------|---|-----|
| .ucgacucagaacAgguaca.....              | 3    | 1 | seq |
| .ucgCcucagaacugguaca.....              | 1    | 1 | seq |
| .Acgacucagaacugguaca.....              | 3    | 1 | seq |
| .ucgacucagUacugguaca.....              | 1    | 1 | seq |
| .ucgacucagaaUugguaca.....              | 3    | 1 | seq |
| .ucgacucagaacCgguaca.....              | 7    | 1 | seq |
| .ucgacucGgaacugguaca.....              | 5    | 1 | seq |
| .ucgGcucagaacugguaca.....              | 5    | 1 | seq |
| .ucgacucagaacugguUa.....               | 5    | 1 | seq |
| .ucgUcucagaacugguaca.....              | 2    | 1 | seq |
| .ucgacucagaGcugguaca.....              | 11   | 1 | seq |
| .ucgacucagaacugguacU.....              | 227  | 1 | seq |
| .ucgacucagaacugguaca.....              | 2775 | 0 | seq |
| .ucgacucagaacuggGaca.....              | 2    | 1 | seq |
| .ucgacucagaacugUuaca.....              | 2    | 1 | seq |
| .Ncgacucagaacugguaca.....              | 2    | 1 | seq |
| .ucgacucagaacuggCaca.....              | 7    | 1 | seq |
| .ucgaUucagaacugguaca.....              | 2    | 1 | seq |
| .ucgacucagaacuggAaca.....              | 1    | 1 | seq |
| .Gcgacucagaacugguaca.....              | 5    | 1 | seq |
| .ucgacucaAaacugguaca.....              | 2    | 1 | seq |
| .ucgacucaUaacugguaca.....              | 1    | 1 | seq |
| .ucgacucagaacuAguaca.....              | 1    | 1 | seq |
| .ucgacucagaCcugguaca.....              | 2    | 1 | seq |
| .ucgacucagaacugguAa.....               | 1    | 1 | seq |
| .ucgacACagaacugguaca.....              | 1    | 1 | seq |
| .ucgacucagGacugguaca.....              | 8    | 1 | seq |
| .ucgacucagaacugguacC.....              | 162  | 1 | seq |
| .ucgacGcagaacugguaca.....              | 2    | 1 | seq |
| .ucgacucagaacugguGca.....              | 19   | 1 | seq |
| .Ccgacucagaacugguaca.....              | 7    | 1 | seq |
| .ucgacucagaaAugguaca.....              | 1    | 1 | seq |
| .Ncgacucagaacugguacag.....             | 1    | 1 | seq |
| .ucgacucagaacugguacag.....             | 172  | 0 | seq |
| .ucgacucagaacGgguacag.....             | 1    | 1 | seq |
| .ucgacucagaacugguacaC.....             | 1    | 1 | seq |
| .ucgacucagGacugguacag.....             | 2    | 1 | seq |
| .Ccgacucagaacugguacag.....             | 1    | 1 | seq |
| .ucgacucagaacugguacUg.....             | 28   | 1 | seq |
| .ucgacucagaacuggCacag.....             | 1    | 1 | seq |
| .ucgacucagaacugguaGag.....             | 1    | 1 | seq |
| .ucgacucagaacugguacCg.....             | 37   | 1 | seq |
| .ucgacucagaacugguacCga.....            | 4    | 1 | seq |
| .ucgacucagaacugguacaga.....            | 28   | 0 | seq |
| .ucgacucagaacugguacUga.....            | 4    | 1 | seq |
| .ucgacucagaacugguacagG.....            | 1    | 1 | seq |
| .ucgacucagaacugguacagac.....           | 2    | 0 | seq |
| .ucgacucagaacugguacagacC.....          | 1    | 1 | seq |
| .ucgacucagaacugguacagacU.....          | 1    | 1 | seq |
| .ucgacucagaacugguacUgaca.....          | 10   | 1 | seq |
| .ucAucucagaacugguacagaca.....          | 1    | 1 | seq |
| .ucgacucagaacugguacagacG.....          | 3    | 1 | seq |
| .ucgacucagaacugguacagaca.....          | 46   | 0 | seq |
| .ucgacucagaacugguacCgaca.....          | 1    | 1 | seq |
| .ucgacucaUaacugguacagaca.....          | 1    | 1 | seq |
| .ucgacucagaacugguacUgacaag.....        | 2    | 1 | seq |
| .ucgacucagaacugguacagacaag.....        | 6    | 0 | seq |
| .ucgacucagaacugguacagacaaggg.....      | 1    | 0 | seq |
| .ucgacucagaacugguacUgacaagggg.....     | 3    | 1 | seq |
| .ucgacucagaacugguacagacaagggg.....     | 8    | 0 | seq |
| .ucgacucagaacugguacCgacaagggg.....     | 2    | 1 | seq |
| .ucgacucagaacugguacagacaagggga.....    | 1    | 0 | seq |
| .ucgacucagaacugguacUgacaaggggaa.....   | 1    | 1 | seq |
| .ucgacucagaacuggAacagacaaggggaa.....   | 1    | 1 | seq |
| .ucgacucagaacugguacagacaaggggaa.....   | 11   | 0 | seq |
| .ucgacucGgaacugguacagacaaggggaa.....   | 1    | 1 | seq |
| .ucgacucagaacugguacagacaaggggaa.....   | 2    | 0 | seq |
| .ucgacucagaacugguacagacaaggggaauc..... | 1    | 0 | seq |
| .ucgacucUgaacugguacagacaaggggaauc..... | 1    | 1 | seq |
| .cgacucagaacugguag.....                | 16   | 1 | seq |



## Mature

## Star

uauggacguagaauguccucucgugggggaauuuuccuagggcgguagaaacagucgacucagaaacugguacagacagaaaggggaucugacuguuuaauuaaaacaaagaauu

|                               |      |   |     |
|-------------------------------|------|---|-----|
| .....cgacucagaacugguGc.....   | 12   | 1 | seq |
| .....cgGcucagaacugguac.....   | 13   | 1 | seq |
| .....cgacucagaacugguGac.....  | 1    | 1 | seq |
| .....Agacucagaacugguac.....   | 2    | 1 | seq |
| .....cgacucagaacugguUc.....   | 6    | 1 | seq |
| .....cgacucagaacugguCc.....   | 2    | 1 | seq |
| .....cgacucagaacugguac.....   | 1755 | 0 | seq |
| .....cgacGcagaacugguac.....   | 1    | 1 | seq |
| .....cgacCcagaacugguac.....   | 4    | 1 | seq |
| .....cgacucagUacugguac.....   | 2    | 1 | seq |
| .....cgacucagaacCgguac.....   | 1    | 1 | seq |
| .....cgaUucagaacugguac.....   | 2    | 1 | seq |
| .....Ngacucagaacugguac.....   | 3    | 1 | seq |
| .....cgacucagaGcugguac.....   | 6    | 1 | seq |
| .....cgUucagaacugguac.....    | 1    | 1 | seq |
| .....cgacucagaacugUuac.....   | 1    | 1 | seq |
| .....cgacucagaacuCguac.....   | 1    | 1 | seq |
| .....cgacucagaacugguaa.....   | 13   | 1 | seq |
| .....cgacucagaaUugguac.....   | 2    | 1 | seq |
| .....cgacucagaacugAuac.....   | 1    | 1 | seq |
| .....cgacucagGacugguac.....   | 7    | 1 | seq |
| .....cgCcucagaacugguac.....   | 1    | 1 | seq |
| .....cgacucGgaacugguac.....   | 5    | 1 | seq |
| .....cgacucagaacuggCaC.....   | 4    | 1 | seq |
| .....Ggacucagaacugguac.....   | 4    | 1 | seq |
| .....cgacucagaacuggGaca.....  | 3    | 1 | seq |
| .....cgacGcagaacugguaca.....  | 2    | 1 | seq |
| .....cgacucagaacAgguaca.....  | 1    | 1 | seq |
| .....cgacucagaacugguaca.....  | 2576 | 0 | seq |
| .....cgacucagaaUugguaca.....  | 1    | 1 | seq |
| .....cgacucagaaUugguaca.....  | 2    | 1 | seq |
| .....cgacucagUacugguaca.....  | 2    | 1 | seq |
| .....cgacucagaacugguUca.....  | 1    | 1 | seq |
| .....cgaUucagaacugguaca.....  | 3    | 1 | seq |
| .....cgacucagaacuggAaca.....  | 1    | 1 | seq |
| .....cgacUagaacugguaca.....   | 1    | 1 | seq |
| .....Agacucagaacugguaca.....  | 2    | 1 | seq |
| .....cgGcucagaacugguaca.....  | 4    | 1 | seq |
| .....cgUucagaacugguaca.....   | 1    | 1 | seq |
| .....cgacucagaacugCuaca.....  | 1    | 1 | seq |
| .....cAacucagaacugguaca.....  | 1    | 1 | seq |
| .....cgacucagaacugAuaca.....  | 1    | 1 | seq |
| .....cgacucagaacugguUa.....   | 2    | 1 | seq |
| .....cgacucagaacuAguaca.....  | 2    | 1 | seq |
| .....cgacucagaacugguacU.....  | 175  | 1 | seq |
| .....cgacucagaacCgguaca.....  | 3    | 1 | seq |
| .....cgacucagGacugguaca.....  | 10   | 1 | seq |
| .....Ngacucagaacugguaca.....  | 5    | 1 | seq |
| .....cgacucGgaacugguaca.....  | 9    | 1 | seq |
| .....cgacucagaacugguGaa.....  | 2    | 1 | seq |
| .....cgacucagaacugguGca.....  | 25   | 1 | seq |
| .....cgacucagaGcugguaca.....  | 9    | 1 | seq |
| .....cgacucagaCcugguaca.....  | 1    | 1 | seq |
| .....cgacucCgaacugguaca.....  | 1    | 1 | seq |
| .....cgacCcagaacugguaca.....  | 7    | 1 | seq |
| .....cgacuAgaacugguaca.....   | 1    | 1 | seq |
| .....cgacucagaacugguCca.....  | 1    | 1 | seq |
| .....cgacuGagaacugguaca.....  | 2    | 1 | seq |
| .....cgacucagCacugguaca.....  | 1    | 1 | seq |
| .....cgacucagaacuggCaca.....  | 2    | 1 | seq |
| .....Ggacucagaacugguaca.....  | 6    | 1 | seq |
| .....cgacucagaacugguacC.....  | 131  | 1 | seq |
| .....cgacAcagaacugguaca.....  | 2    | 1 | seq |
| .....cgacucagGacugguacag..... | 2    | 1 | seq |
| .....cgacucagaacugguacaC..... | 1    | 1 | seq |
| .....cgacucagaacCgguacag..... | 1    | 1 | seq |
| .....cgacCcagaacugguacag..... | 2    | 1 | seq |
| .....cgacucagaacugguacCg..... | 32   | 1 | seq |
| .....cgacucagaacugguacaU..... | 1    | 1 | seq |
| .....cgacucagUacugguacag..... | 1    | 1 | seq |

## Mature

## Star

uauggacguagaauguccucucgugggggaauuuucccuagggcgguagaaacagucgacucagagaacuggguacagacagaaggggaucugacuguuuaauuaaaacaaagaauu

|                                                  |     |   |     |
|--------------------------------------------------|-----|---|-----|
| .....cgacucagaacuggAacag.....                    | 1   | 1 | seq |
| .....cgacucagaacugguacUg.....                    | 16  | 1 | seq |
| .....cgacucagaacuggguacag.....                   | 151 | 0 | seq |
| .....cgacucagaacuggguUcag.....                   | 1   | 1 | seq |
| .....cgacucGgaacuggguacag.....                   | 1   | 1 | seq |
| .....cgacucagaacuggguGcag.....                   | 1   | 1 | seq |
| .....cgacucagaacuggguacagU.....                  | 1   | 1 | seq |
| .....cgacucagaacuggguacCga.....                  | 4   | 1 | seq |
| .....cgacucagaacuggguacagG.....                  | 3   | 1 | seq |
| .....cgacucagaacuggguacUga.....                  | 7   | 1 | seq |
| .....cgacucagaacuggguacaga.....                  | 19  | 0 | seq |
| .....cgGcucagaacuggguacagac.....                 | 1   | 1 | seq |
| .....cgacucagaacuggguacagac.....                 | 5   | 0 | seq |
| .....cgacucagaacuggguacUgac.....                 | 2   | 1 | seq |
| .....cgacucagaacuggguacagaca.....                | 53  | 0 | seq |
| .....cgacucagaGcuggguacagaca.....                | 1   | 1 | seq |
| .....cgacucagaacuggguCcagaca.....                | 1   | 1 | seq |
| .....cgacucagGacuggguacagaca.....                | 1   | 1 | seq |
| .....cgacucagaacuggguacUgaca.....                | 7   | 1 | seq |
| .....cgacucagaacuggguacagacG.....                | 6   | 1 | seq |
| .....cgacucagaacuggguacCgaca.....                | 3   | 1 | seq |
| .....cgacucagaacuggguacagacaag.....              | 7   | 0 | seq |
| .....cgacucagaacuggguacUgacaag.....              | 2   | 1 | seq |
| .....cgacucagaacuggguacagacaaggg.....            | 1   | 0 | seq |
| .....cgacucagaacuggguacUgacaagggg.....           | 2   | 1 | seq |
| .....cgacucagaacuggguacagacaagggg.....           | 3   | 0 | seq |
| .....cgacucagaacuggguacagacaagggA.....           | 1   | 1 | seq |
| .....cgacucagaacuggguacagacaagggAg.....          | 1   | 1 | seq |
| .....cgacucagaacuggguacagacaaggggaa.....         | 6   | 0 | seq |
| .....cgacucagaacuggguacUgacaaggggaa.....         | 1   | 1 | seq |
| .....cgacucagaacuggguacagacaaggggaaU.....        | 1   | 0 | seq |
| .....cgacucagaacuggguacUgacaaggggaaU.....        | 1   | 1 | seq |
| .....cgacucagaacuggguacagacaaggggaaucU.....      | 1   | 0 | seq |
| .....gacucagaacuggguGca.....                     | 1   | 1 | seq |
| .....gacucagGacuggguaca.....                     | 1   | 1 | seq |
| .....gacucagaacugCuaca.....                      | 1   | 1 | seq |
| .....gacucagaacCgguaca.....                      | 1   | 1 | seq |
| .....gacucagaacuggguacC.....                     | 4   | 1 | seq |
| .....gacucagaacuggguaca.....                     | 51  | 0 | seq |
| .....Cacucagaacuggguaca.....                     | 1   | 1 | seq |
| .....gacucagaGcuggguaca.....                     | 1   | 1 | seq |
| .....gacucagaacuggguUcag.....                    | 1   | 1 | seq |
| .....gacucagaacuggguacag.....                    | 7   | 0 | seq |
| .....gacucagaacuggguacagac.....                  | 1   | 0 | seq |
| .....gacucagaacuggguacagacaaggggaa.....          | 2   | 0 | seq |
| .....gacucagaacuggguacagacaaggggaauc.....        | 2   | 0 | seq |
| .....acucagaacuggguacag.....                     | 52  | 0 | seq |
| .....acucagaacuggguacaU.....                     | 1   | 1 | seq |
| .....acucagaacuggguacCg.....                     | 11  | 1 | seq |
| .....acucagaacuCguacag.....                      | 1   | 1 | seq |
| .....acucagaGcuggguacaga.....                    | 1   | 1 | seq |
| .....acucagaacuggguacagG.....                    | 1   | 1 | seq |
| .....acucagaacuggguacaga.....                    | 5   | 0 | seq |
| .....acucagaacuggguacCgac.....                   | 1   | 1 | seq |
| .....acucagaacuggguacagac.....                   | 4   | 0 | seq |
| .....acucagaacuggguacagCca.....                  | 1   | 1 | seq |
| .....acucagaacuggguacagaca.....                  | 9   | 0 | seq |
| .....acucagaacuggguacagacU.....                  | 2   | 1 | seq |
| .....acucUgaacuggguacagaca.....                  | 1   | 1 | seq |
| .....acucagaacuggguacagacaa.....                 | 1   | 0 | seq |
| .....acucagaacuggguacagacaag.....                | 1   | 0 | seq |
| .....acucagaacuggguacagacaagggg.....             | 4   | 0 | seq |
| .....acucagaacuggguacagacaaggggaa.....           | 3   | 0 | seq |
| .....acucagaaGuggguacagacaaggggaaU.....          | 1   | 1 | seq |
| .....acucagaacuggguacagacaaggggaauc.....         | 3   | 0 | seq |
| .....acucagaacuggguacagacaaggggaaucU.....        | 2   | 0 | seq |
| .....acucagaacuggguacUgacaaggggaaucugacuguu..... | 1   | 1 | seq |
| .....cucagaacuggguacCga.....                     | 4   | 1 | seq |
| .....cucagaacuggguacaga.....                     | 6   | 0 | seq |
| .....cucagaacuggguacagac.....                    | 7   | 0 | seq |

## Mature

## Star

uauggacguagaauguccucucgugggggaauuuucccuagggcgguagaa**cagucgacucagaaacugguacagacaaggggaucugacuguuuaauuaaaacaaagaauu**

|                                         |    |   |     |
|-----------------------------------------|----|---|-----|
| .....cucagaacugguCcagac.....            | 1  | 1 | seq |
| .....cucagaacugAuacagaca.....           | 1  | 1 | seq |
| .....cucagaacugguacagaca.....           | 36 | 0 | seq |
| .....cucGgaacugguacagaca.....           | 1  | 1 | seq |
| .....cucagaacCgguacagaca.....           | 1  | 1 | seq |
| .....cucagaacugguacagacaa.....          | 1  | 0 | seq |
| .....cucagaacugguacagacaag.....         | 3  | 0 | seq |
| .....cucagaacugguacagacaagg.....        | 1  | 0 | seq |
| .....cucagaacugguacagacaaggAg.....      | 1  | 1 | seq |
| .....cucagaacugguacagacaagggg.....      | 16 | 0 | seq |
| .....cucagaacugguacagacaagggga.....     | 1  | 0 | seq |
| .....cucagaacCgguacagacaaggggaa.....    | 1  | 1 | seq |
| .....cucagaacugguacCgacaaggggaa.....    | 1  | 1 | seq |
| .....cucagaacugguacagGcaaggggaa.....    | 1  | 1 | seq |
| .....cucagaacugguacagacaaggggaa.....    | 5  | 0 | seq |
| .....cucagaacugguacagacaaggggaaU.....   | 3  | 0 | seq |
| .....cucagGacugguacagacaaggggaauc.....  | 1  | 1 | seq |
| .....cucagaacugguacagacaaggggaauc.....  | 1  | 0 | seq |
| .....ucagaacugguacCgac.....             | 1  | 1 | seq |
| .....ucagaacugguacagac.....             | 2  | 0 | seq |
| .....ucagaacugguacagaca.....            | 4  | 0 | seq |
| .....ucagaacugguacagacaag.....          | 1  | 0 | seq |
| .....ucagaacugguacagacaagggg.....       | 3  | 0 | seq |
| .....cagaacugguacagaca.....             | 25 | 0 | seq |
| .....cagaacugguacCgaca.....             | 1  | 1 | seq |
| .....cagaacugguacagacG.....             | 1  | 1 | seq |
| .....cagaacugguacagacC.....             | 2  | 1 | seq |
| .....cagaacugguacagacaa.....            | 1  | 0 | seq |
| .....cagaacugguacagacaag.....           | 2  | 0 | seq |
| .....cagaacugguacCgacaag.....           | 1  | 1 | seq |
| .....cagaacugguacagacaagU.....          | 1  | 1 | seq |
| .....cagaacugguacagacaagggg.....        | 2  | 0 | seq |
| .....cagaacugguacagacaaggggaa.....      | 1  | 0 | seq |
| .....agaacugguacagacaa.....             | 1  | 0 | seq |
| .....agaacugguacagacaag.....            | 1  | 0 | seq |
| .....agaacugguacagacaagg.....           | 1  | 0 | seq |
| .....agaacugguacagacaagA.....           | 1  | 1 | seq |
| .....agaacugguacCgacaagggg.....         | 1  | 1 | seq |
| .....agaacugguacagacaaggggaaU.....      | 1  | 0 | seq |
| .....agaacugguacagacaaggggaauc.....     | 2  | 0 | seq |
| .....gaacugguacagacaag.....             | 2  | 0 | seq |
| .....gaacugguacagacaagg.....            | 2  | 0 | seq |
| .....gaacugguacagacaagggg.....          | 5  | 0 | seq |
| .....gaacugguacagacaaggggaa.....        | 1  | 0 | seq |
| .....gaacugguacagacaaggggaauc.....      | 1  | 0 | seq |
| .....aacugguacagacaagg.....             | 1  | 0 | seq |
| .....aacugguacagacaagggg.....           | 2  | 0 | seq |
| .....aacugguacagacaaggggaa.....         | 2  | 0 | seq |
| .....acugguacagacaaggg.....             | 1  | 0 | seq |
| .....acugguacagacaGgggg.....            | 1  | 1 | seq |
| .....acugguacagacaaggg.....             | 3  | 0 | seq |
| .....acugguacagacaagggga.....           | 1  | 0 | seq |
| .....acugguacagacaaggggaa.....          | 1  | 0 | seq |
| .....acugguacagacaaggggaauc.....        | 1  | 0 | seq |
| .....acugguacagacaaggggaaCc.....        | 1  | 1 | seq |
| .....cugguacagacaagggg.....             | 3  | 0 | seq |
| .....cugguacagacaaggggaa.....           | 3  | 0 | seq |
| .....cugguacagacaaggggaaU.....          | 1  | 0 | seq |
| .....cugguacagacaaggggaauc.....         | 1  | 0 | seq |
| .....ugguacagacaaggggaa.....            | 1  | 0 | seq |
| .....ugguacagacaaggggaaC.....           | 1  | 1 | seq |
| .....ugguacagacaaggggaaucU.....         | 1  | 0 | seq |
| .....gguacagacaaggggaaG.....            | 1  | 1 | seq |
| .....gguacagacaaggggaaU.....            | 1  | 0 | seq |
| .....gguacagacaaggggaaC.....            | 1  | 1 | seq |
| .....gguacagacaaggggaauc.....           | 1  | 0 | seq |
| .....gguacagacaaggggaaucug.....         | 1  | 0 | seq |
| .....gguacCgacaaggggaaucugacuguuua..... | 1  | 1 | seq |
| .....uacCgacaaggggaauc.....             | 1  | 1 | seq |
| .....uacagacaaggggaauc.....             | 10 | 0 | seq |

## Mature

## Star

uauaggacguagaauguccucucgugggggaauuuuccuagggcgugaacagucgacucagaaacugguacagacaaggggaucugacuguuuaauuaaaacaaagaauu

|                                               |    |   |     |
|-----------------------------------------------|----|---|-----|
| .....uacagacaGggggaauc.....                   | 1  | 1 | seq |
| .....uacagacaaggggaucuu.....                  | 2  | 0 | seq |
| .....cagacaaggggaucugac.....                  | 1  | 0 | seq |
| .....gacaaggggaucugac.....                    | 2  | 0 | seq |
| .....gacaaggggaucugacC.....                   | 1  | 1 | seq |
| .....gacaaggggaucGgacu.....                   | 1  | 1 | seq |
| .....gacaaggggaucugGcug.....                  | 1  | 1 | seq |
| .....gacaaggggaucugacug.....                  | 5  | 0 | seq |
| .....gacaaggggaucugacugu.....                 | 2  | 0 | seq |
| .....gacaaggggaucugacugC.....                 | 1  | 1 | seq |
| .....gacaaggggaucugacuguuu.....               | 2  | 0 | seq |
| .....gacaaggggaucugacuguuua.....              | 1  | 0 | seq |
| .....gacaaggggaucugacuguuuaaC.....            | 1  | 1 | seq |
| .....gacaaggggaucugacuguuuaau.....            | 1  | 0 | seq |
| .....gacaaggggaucugacuguuuaauu.....           | 1  | 0 | seq |
| .....gacaaggggaucugacuguuuaauuaaaac.....      | 1  | 0 | seq |
| .....gacaaggggaucGgacuguuuaauuaaaac.....      | 1  | 1 | seq |
| .....gacaaggggaucugacuguuuaauuaaaaca.....     | 1  | 0 | seq |
| .....gacaaggggaucugacuguuuaauuaaaacG.....     | 1  | 1 | seq |
| .....gacaaggggaucugacuguuuaauuaGaaaca.....    | 1  | 1 | seq |
| .....gacaaggggaucCgacuguuuaauuaaaacaaga.....  | 3  | 1 | seq |
| .....acaaggggaucAgacu.....                    | 1  | 1 | seq |
| .....acaaggggaucugacu.....                    | 1  | 0 | seq |
| .....acaaggggaucugacug.....                   | 4  | 0 | seq |
| .....acaaggggaucAgacugu.....                  | 2  | 1 | seq |
| .....acaaggggaucugacugu.....                  | 4  | 0 | seq |
| .....acaaggggaucGgacugu.....                  | 1  | 1 | seq |
| .....acaaggggaucAgacuguu.....                 | 4  | 1 | seq |
| .....acaaAggggaucugacuguu.....                | 1  | 1 | seq |
| .....acaaggggaucugacuguu.....                 | 7  | 0 | seq |
| .....acaaggggaucugacuguuu.....                | 1  | 0 | seq |
| .....acaaggggaucAgacuguuu.....                | 1  | 1 | seq |
| .....acaaggggaucGgacuguuua.....               | 1  | 1 | seq |
| .....acaaggggaucugacuguuuaau.....             | 2  | 0 | seq |
| .....acaaggggaucAgacuguuuaau.....             | 1  | 1 | seq |
| .....acaaggggaucugacuguuuaauu.....            | 6  | 0 | seq |
| .....acaaggggaucGgacuguuuaauu.....            | 1  | 1 | seq |
| .....acaaggggaucAgacuguuuaauu.....            | 2  | 1 | seq |
| .....acaaggggaucugacuguuuaauG.....            | 1  | 1 | seq |
| .....acaaggggaucAgacuguuuaauua.....           | 1  | 1 | seq |
| .....acaaggggaucGgacuguuuaauua.....           | 1  | 1 | seq |
| .....acaaggggaucugacuguuuaauuaa.....          | 2  | 0 | seq |
| .....acaaggggaucugacuguuuaauuaaaa.....        | 1  | 0 | seq |
| .....acaaggggaucugacuguuuaauuaaaaac.....      | 3  | 0 | seq |
| .....acaaggggaucGgacuguuuaauuaaaaacaaa.....   | 1  | 1 | seq |
| .....acaaggggaucugacuguuuaauuaaaaacaaa.....   | 1  | 0 | seq |
| .....acaaggggaucCgacuguuuaauuaaaaacaaaga..... | 2  | 1 | seq |
| .....caaggggaucGgacug.....                    | 1  | 1 | seq |
| .....caaggggaucAgacug.....                    | 1  | 1 | seq |
| .....caaggggaucugacug.....                    | 7  | 0 | seq |
| .....caaggggaucAgacugu.....                   | 1  | 1 | seq |
| .....caaggggaucugacugu.....                   | 3  | 0 | seq |
| .....caaggggaucAgacuguu.....                  | 10 | 1 | seq |
| .....caaggggaucugacugAu.....                  | 1  | 1 | seq |
| .....caaggggaucGgacuguu.....                  | 5  | 1 | seq |
| .....caaggggaucugacuguG.....                  | 1  | 1 | seq |
| .....caaggggaucugacuguu.....                  | 33 | 0 | seq |
| .....caaggggaucugacuguC.....                  | 3  | 1 | seq |
| .....cUaggggaucugacuguuu.....                 | 1  | 1 | seq |
| .....caaggggaucugacuguuu.....                 | 14 | 0 | seq |
| .....caaggggaucAgacuguuu.....                 | 2  | 1 | seq |
| .....caaggggUaucugacuguuua.....               | 1  | 1 | seq |
| .....caaggggaucAgacuguuua.....                | 6  | 1 | seq |
| .....caaggggaucugacuguuua.....                | 28 | 0 | seq |
| .....caaggggaucGgacuguuua.....                | 3  | 1 | seq |
| .....caaggggaucugacuguuuaa.....               | 4  | 0 | seq |
| .....caaggggaucAgacuguuuaa.....               | 2  | 1 | seq |
| .....caaggggaucugacuguuuaaC.....              | 2  | 1 | seq |
| .....caaggggaucAgacuguuuaau.....              | 2  | 1 | seq |
| .....caaggggaucugacuguuuaau.....              | 5  | 0 | seq |

## Mature

## Star

uauggacguagaauguccucucgugggggaauuuuccuagcgcgugaacagucgacucagaaacugguacagacaaggggaucugacuguuuaauaaaaacaagaauu

|                                             |    |   |     |
|---------------------------------------------|----|---|-----|
| .....caaggggaaucGgacuguuuaau.....           | 2  | 1 | seq |
| .....caaggggaaucugacuguuuaau.....           | 12 | 0 | seq |
| .....caaggggaaucAgacuguuuaau.....           | 3  | 1 | seq |
| .....caaggggaaucugacuguuuaauC.....          | 1  | 1 | seq |
| .....caaggggaaucugacuguuuaaua.....          | 2  | 0 | seq |
| .....caaggggaaucugacuguuuaauCa.....         | 1  | 1 | seq |
| .....caaggggaaucugacuguuuaauaaa.....        | 1  | 0 | seq |
| .....caaggggaaucugacuguuuaauaaaaa.....      | 1  | 0 | seq |
| .....caaggggaaucGgacuguuuaauaaaaaca.....    | 5  | 1 | seq |
| .....Caggggaaucugacugu.....                 | 1  | 1 | seq |
| .....aaggggaaucAgacugu.....                 | 2  | 1 | seq |
| .....Caggggaaucugacuguu.....                | 1  | 1 | seq |
| .....aagCggaucugacuguu.....                 | 1  | 1 | seq |
| .....aaggggaaucGgacuguu.....                | 5  | 1 | seq |
| .....aaggggaaucugacuguA.....                | 1  | 1 | seq |
| .....aaggggaaucAgacuguu.....                | 2  | 1 | seq |
| .....aaggggaaucugacuguu.....                | 4  | 0 | seq |
| .....aaggggaaucugacuguC.....                | 1  | 1 | seq |
| .....aaggggaaucAgacuguuu.....               | 1  | 1 | seq |
| .....aaggggaaucugacuguuu.....               | 5  | 0 | seq |
| .....aaggggaaucGgacuguuu.....               | 1  | 1 | seq |
| .....aaggggaaucugacuguuuu.....              | 7  | 0 | seq |
| .....aaggggaaucGgacuguuuu.....              | 2  | 1 | seq |
| .....aaggggaaucugacuguuuG.....              | 1  | 1 | seq |
| .....aaggggaaucAgacuguuuu.....              | 2  | 1 | seq |
| .....aaggggaaucGgacuguuuua.....             | 1  | 1 | seq |
| .....aaggggaaucugacuguuuua.....             | 1  | 0 | seq |
| .....aaggggaaucAgacuguuuua.....             | 2  | 1 | seq |
| .....aaggggaaucugacuguuuuaC.....            | 1  | 1 | seq |
| .....aaggggaaucugGcuguuuuaau.....           | 1  | 1 | seq |
| .....aaggggaaucGgacuguuuuaau.....           | 1  | 1 | seq |
| .....aaggggaaucAgacuguuuuaau.....           | 4  | 1 | seq |
| .....aaggggaaucugacuguuuuaau.....           | 5  | 0 | seq |
| .....aaggggaaucugacuguuuuaauC.....          | 1  | 1 | seq |
| .....aaggggaaucugacuguuuuaaua.....          | 1  | 0 | seq |
| .....aaggggaaucAgacuguuuuaauaaa.....        | 1  | 1 | seq |
| .....aaggggaaucugacuguuuuaauaaaa.....       | 1  | 0 | seq |
| .....aaggggaaucGgacuguuuuaauaaaa.....       | 1  | 1 | seq |
| .....Uaggggaaucugacuguuuuaauaaaaaca.....    | 1  | 1 | seq |
| .....aaggggaaucugacuguuuuaauaaaaa.....      | 2  | 0 | seq |
| .....aaggggaaucGgacuguuuuaauaaaaacaaga..... | 1  | 1 | seq |
| .....aggggaaucNgacuguu.....                 | 1  | 1 | seq |
| .....aggggaaucAgacuguu.....                 | 5  | 1 | seq |
| .....aggggaaucGgacuguu.....                 | 1  | 1 | seq |
| .....aAggggaaucugacuguu.....                | 1  | 1 | seq |
| .....aggggaaucugacuguu.....                 | 34 | 0 | seq |
| .....aggggaaucugacuguC.....                 | 6  | 1 | seq |
| .....Gggggaaucugacuguu.....                 | 1  | 1 | seq |
| .....aggggaaucugacuguuu.....                | 11 | 0 | seq |
| .....aggggaaucGgacuguuu.....                | 1  | 1 | seq |
| .....aggggaaucAgacuguuuu.....               | 7  | 1 | seq |
| .....aggggaaucugacuguuuu.....               | 22 | 0 | seq |
| .....aggggaaucugacuguuuu.....               | 1  | 1 | seq |
| .....aggggaaucGgacuguuuu.....               | 2  | 1 | seq |
| .....aggggaaucugacuguuuua.....              | 5  | 0 | seq |
| .....aggggaaucugacuguuuuaa.....             | 4  | 0 | seq |
| .....aggggUaucugacuguuuuaa.....             | 1  | 1 | seq |
| .....aggggaaucugacuguuuuaaC.....            | 3  | 1 | seq |
| .....aggggaaucAgacuguuuuaau.....            | 1  | 1 | seq |
| .....aggggaaucugacuguuuuaau.....            | 5  | 0 | seq |
| .....aggggaaucugacuguuuuaaua.....           | 2  | 0 | seq |
| .....aggggaaucGgacuguuuuaaua.....           | 1  | 1 | seq |
| .....aggggaaucugacuguuuuaauaaa.....         | 1  | 0 | seq |
| .....aggggaaucAgacuguuuuaauaaaa.....        | 1  | 1 | seq |
| .....aggggaaucugacuguuuuaauaaaaa.....       | 3  | 0 | seq |
| .....aggggaaucAgacuguuuuaauaaaaac.....      | 1  | 1 | seq |
| .....aggggaaucugacuguuuuaauaaaaacaa.....    | 1  | 0 | seq |
| .....aggggaaucugacuguuuuaauaaaaacaaag.....  | 1  | 0 | seq |
| .....aggggaaucGgacuguuuuaauaaaaacaaaga..... | 4  | 1 | seq |
| .....gggggaaucugacuguuC.....                | 2  | 1 | seq |

## Mature

## Star

uaggacguagaauguccucucgugggggaauuuucccuagcgugaaacagucgacucagaaacugguacagacaaaggggaucugacuguuuaauaaaacaagaauu

|                                            |    |   |     |
|--------------------------------------------|----|---|-----|
| .....ggggaucAgacuguuu.....                 | 8  | 1 | seq |
| .....ggggaucugacuguuu.....                 | 26 | 0 | seq |
| .....ggggaucGgacuguuu.....                 | 13 | 1 | seq |
| .....ggggaucugacuguuCua.....               | 1  | 1 | seq |
| .....ggggaucugacuguuua.....                | 39 | 0 | seq |
| .....ggggaucGgacuguuua.....                | 11 | 1 | seq |
| .....ggggaucAgacuguuua.....                | 17 | 1 | seq |
| .....ggggaucugacCguuuua.....               | 1  | 1 | seq |
| .....ggggGaucugacuguuua.....               | 1  | 1 | seq |
| .....ggggaucugacuguuuaa.....               | 12 | 0 | seq |
| .....ggggaucAgacuguuuaa.....               | 3  | 1 | seq |
| .....ggggaucGgacuguuuaa.....               | 3  | 1 | seq |
| .....ggggaucGgacuguuuaau.....              | 5  | 1 | seq |
| .....ggggaucugacuguuuaau.....              | 11 | 0 | seq |
| .....ggggaucugacuguuuaaC.....              | 2  | 1 | seq |
| .....ggggaucAgacuguuuaau.....              | 1  | 1 | seq |
| .....ggggaucugacuguuuaaC.....              | 2  | 1 | seq |
| .....ggggaucGgacuguuuaauu.....             | 11 | 1 | seq |
| .....ggggaucugacuguuuaauu.....             | 11 | 0 | seq |
| .....ggggaucAgacuguuuaauu.....             | 3  | 1 | seq |
| .....ggggaucAgacuguuuaauua.....            | 3  | 1 | seq |
| .....ggggaucugacuguuuaauua.....            | 7  | 0 | seq |
| .....ggggaucugacuguuuaGuua.....            | 1  | 1 | seq |
| .....ggggaucGgacuguuuaauua.....            | 1  | 1 | seq |
| .....ggggaucugacuguuuaauuaa.....           | 2  | 0 | seq |
| .....ggggaucAgacuguuuaauuaa.....           | 1  | 1 | seq |
| .....ggggaucGgacuguuuaauuaa.....           | 1  | 1 | seq |
| .....ggggaucAgacuguuuaauuaaa.....          | 1  | 1 | seq |
| .....ggggaucugacuguuuaauuaaa.....          | 2  | 0 | seq |
| .....ggggaucGgacuguuuaauuaaa.....          | 2  | 1 | seq |
| .....ggggaucAgacuguuuaauuaaaa.....         | 3  | 1 | seq |
| .....ggggaucGgacuguuuaauuaaaa.....         | 1  | 1 | seq |
| .....ggggaucugacuguuuaauuaaaa.....         | 3  | 0 | seq |
| .....ggggaucAgacuguuuaauuaaaaac.....       | 1  | 1 | seq |
| .....ggggaucugacuguuuaauuaaaaaca.....      | 4  | 0 | seq |
| .....ggggaucGgacuguuuaauuaaaaaca.....      | 1  | 1 | seq |
| .....ggggaucugacuguuuaauuaaaaacaa.....     | 1  | 0 | seq |
| .....ggggaucGgacuguuuaauuaaaaacaa.....     | 1  | 1 | seq |
| .....ggggaucugacuguuuaauuaaaaacaaag.....   | 1  | 0 | seq |
| .....ggggaucCgacuguuuaauuaaaaacaaaga.....  | 2  | 1 | seq |
| .....ggggaucCgacuguuuaauuaaaaacaaagaa..... | 1  | 1 | seq |
| .....gggaucGgacuguuua.....                 | 4  | 1 | seq |
| .....Uggaaucugacuguuua.....                | 1  | 1 | seq |
| .....gggaucugacuguuCua.....                | 1  | 1 | seq |
| .....gggaucAgacuguuua.....                 | 10 | 1 | seq |
| .....gggaucugacuguuua.....                 | 41 | 0 | seq |
| .....gggaucGgacuguuuaa.....                | 1  | 1 | seq |
| .....gggaucAgacuguuuaa.....                | 3  | 1 | seq |
| .....gggaucugacuguuuaa.....                | 7  | 0 | seq |
| .....gggaucugacuguuuaau.....               | 13 | 0 | seq |
| .....gggaucugacuguuuaaC.....               | 3  | 1 | seq |
| .....gggaucGgacuguuuaau.....               | 1  | 1 | seq |
| .....gggaucAgacuguuuaau.....               | 1  | 1 | seq |
| .....gggaucAgacuguuuaauu.....              | 5  | 1 | seq |
| .....gggaucugacuguuuaauu.....              | 13 | 0 | seq |
| .....gggaucGgacuguuuaauua.....             | 2  | 1 | seq |
| .....gggaucAgacuguuuaauua.....             | 1  | 1 | seq |
| .....gggaucugacuguuuaauua.....             | 5  | 0 | seq |
| .....gggaucGgacuguuuaauuaa.....            | 2  | 1 | seq |
| .....gggaucugacuguuuaauuaa.....            | 3  | 0 | seq |
| .....gggaucAgacuguuuaauuaa.....            | 1  | 1 | seq |
| .....gggaucAgacuguuuaauuaaaa.....          | 2  | 1 | seq |
| .....gggaucugacuguuuaauuaaaa.....          | 2  | 0 | seq |
| .....gggaucugacuguuuaauuaaaaac.....        | 4  | 0 | seq |
| .....gggaucugacuguuuaauuaaaaaca.....       | 5  | 0 | seq |
| .....gggaucAgacuguuuaauuaaaaaca.....       | 2  | 1 | seq |
| .....gggaucugacuguuuaauuaaaaacaa.....      | 3  | 0 | seq |
| .....gggaucAgacuguuuaauuaaaaacaa.....      | 1  | 1 | seq |
| .....gggaucugacuguuuaauuaaaaacaaa.....     | 2  | 0 | seq |

## Mature

## Star

uauaggacguagaauuguccucucgugggggauguuuucccuagggcgugaaacagucgacucagaaacugguacagacaagggggaucugacuguuuaauuaaaacaagaauu

|                                       |    |   |     |
|---------------------------------------|----|---|-----|
| .....gggaauCgacuguuuaauuaaaacaag....  | 1  | 1 | seq |
| .....gggaucugacuguuuaauuaaaacaag....  | 3  | 0 | seq |
| .....gggaauCgacuguuuaauuaaaacaaga...  | 10 | 1 | seq |
| .....gggaauCgacuguuuaauuaaaacaagaa..  | 1  | 1 | seq |
| .....ggaaucugacuguuuaa.....           | 1  | 0 | seq |
| .....ggaaucAgacuguuuaauua.....        | 1  | 1 | seq |
| .....ggaaucugacuguuuaauuaaa.....      | 1  | 0 | seq |
| .....ggaaucugacuguuuaauuaaaac.....    | 2  | 0 | seq |
| .....ggaaucugacuguuuaauuaaaaca.....   | 1  | 0 | seq |
| .....ggaaucugacuguuuaauuaaaacaaa..... | 1  | 0 | seq |
| .....ggaaucCgacuguuuaauuaaaacaaga...  | 8  | 1 | seq |
| .....ggaaucCgacuguuuaauuaaaacaagaa..  | 1  | 1 | seq |
| .....gaaucugacuguuuaau.....           | 1  | 0 | seq |
| .....gaaucAgacuguuuaau.....           | 2  | 1 | seq |
| .....gaaucugacuguuuaauu.....          | 7  | 0 | seq |
| .....gaaucugacuguuuaauua.....         | 2  | 0 | seq |
| .....gaaucGgacuguuuaauuaaaac.....     | 1  | 1 | seq |
| .....gaaucAgacuguuuaauuaaaac.....     | 1  | 1 | seq |
| .....gaaucAgacuguuuaauuaaaaca.....    | 1  | 1 | seq |
| .....gaaucAgacuguuuaauuaaaacaa.....   | 1  | 1 | seq |
| .....gaaucugacuguuuaauuaaaacaaa.....  | 1  | 0 | seq |
| .....gaaucugacuguuuaauuaaaacaaa.....  | 2  | 0 | seq |
| .....gaaucGgacuguuuaauuaaaacaaa.....  | 1  | 1 | seq |
| .....gaaucugacuguuuaauuaaaacaag....   | 2  | 0 | seq |
| .....gaaucCgacuguuuaauuaaaacaaga...   | 8  | 1 | seq |
| .....aaucGgacuguuuaauu.....           | 1  | 1 | seq |
| .....aaucugacuguuuaauu.....           | 3  | 0 | seq |
| .....aaucugacuguuuaauC.....           | 2  | 1 | seq |
| .....aaucAgacuguuuaauu.....           | 1  | 1 | seq |
| .....aaucugacuguuuaauua.....          | 5  | 0 | seq |
| .....aaucugacuguuuaauuaa.....         | 3  | 0 | seq |
| .....aaucGgacuguuuaauuaa.....         | 1  | 1 | seq |
| .....aaucugacuguuuaauuaaa.....        | 2  | 0 | seq |
| .....aaucAgacuguuuaauuaaa.....        | 1  | 1 | seq |
| .....aaucAgacuguuuaauuaaaa.....       | 1  | 1 | seq |
| .....aaucugacuguuuaauuaaaac.....      | 2  | 0 | seq |
| .....aaucAgacuguuuaauuaaaac.....      | 1  | 1 | seq |
| .....aaucugacugCuuaauuaaaaca.....     | 1  | 1 | seq |
| .....aaucGgacuguuuaauuaaaaca.....     | 1  | 1 | seq |
| .....aaucugacuguuuaauuaaaaca.....     | 2  | 0 | seq |
| .....aaucugacuguuuaauuaaaacaa.....    | 4  | 0 | seq |
| .....aaucAgacuguuuaauuaaaacaa.....    | 1  | 1 | seq |
| .....aaucugacuguuuaauuaaaacaaa.....   | 4  | 0 | seq |
| .....aaucugacuguuuaauuaaaacaag....    | 2  | 0 | seq |
| .....aaucCgacuguuuaauuaaaacaaga...    | 13 | 1 | seq |
| .....aucugacuguuuaauua.....           | 2  | 0 | seq |
| .....aucugacuguuuaauuaaa.....         | 1  | 0 | seq |
| .....aucugacuguuuaauuaaaa.....        | 1  | 0 | seq |
| .....aucugacuguuuaauuaaaac.....       | 1  | 0 | seq |
| .....aucugacuguuuaauuaaaaca.....      | 2  | 0 | seq |
| .....aucAgacuguuuaauuaaaaca.....      | 3  | 1 | seq |
| .....aucugacuguuuaauuaaaacaa.....     | 1  | 0 | seq |
| .....aucAgacuguuuaauuaaaacaag....     | 1  | 1 | seq |
| .....aucCgacuguuuaauuaaaacaaga...     | 6  | 1 | seq |
| .....ucAgacuguuuaauuaa.....           | 4  | 1 | seq |
| .....ucugacuguuuaauuaa.....           | 11 | 0 | seq |
| .....ucGgacuguuuaauuaaa.....          | 1  | 1 | seq |
| .....ucugacuguuuaauuaaa.....          | 6  | 0 | seq |
| .....ucAgacuguuuaauuaaa.....          | 3  | 1 | seq |
| .....ucugacuguuuaauuaaaa.....         | 7  | 0 | seq |
| .....ucGgacuguuuaauuaaaac.....        | 2  | 1 | seq |
| .....ucGgacuguuuaauuaaaaca.....       | 2  | 1 | seq |
| .....ucAgacuguuuaauuaaaaca.....       | 1  | 1 | seq |
| .....ucugacuguuuaauuaaaaca.....       | 11 | 0 | seq |
| .....ucugacuguuuaauuaaaacaa.....      | 3  | 0 | seq |
| .....ucAgacuguuuaauuaaaacaa.....      | 1  | 1 | seq |
| .....Gcugacuguuuaauuaaaacaa.....      | 1  | 1 | seq |
| .....ucGgacuguuuaauuaaaacaa.....      | 1  | 1 | seq |
| .....ucugacuguuuaauuaaaacaaa.....     | 6  | 0 | seq |
| .....ucAgacuguuuaauuaaaacaaa.....     | 2  | 1 | seq |

## Mature

## Star

uauaggacguagaauGCCUCUGUGGGGGAUUUUCCCUAGGCGGUGAACAGUCGACUCAGAACUGGUAACAGACAAGGGGAUCUGACUGUUUAAUUAAAAACAAGAAUU

|                                   |     |   |     |
|-----------------------------------|-----|---|-----|
| .....ucGgacuguuuaauuaaaacaaa..... | 2   | 1 | seq |
| .....ucugacuguuuaauuaaaacaaag.... | 1   | 0 | seq |
| .....ucCgacuguuuaauuaaaacaaaga... | 21  | 1 | seq |
| .....ucCgacuguuuaauuaaaacaaagaa.. | 1   | 1 | seq |
| .....Augacuguuuaauuaaaa.....      | 1   | 1 | seq |
| .....cugacuguuuaauuaaaa.....      | 4   | 0 | seq |
| .....cugacuguuuaauuaaaa.....      | 3   | 0 | seq |
| .....cAgacuguuuaauuaaaac.....     | 1   | 1 | seq |
| .....cugacuguuuaauuaaaac.....     | 6   | 0 | seq |
| .....cugacuguuuaauuaaaaca.....    | 7   | 0 | seq |
| .....cAgacuguuuaauuaaaaca.....    | 1   | 1 | seq |
| .....cugacuguuuaauuaaaacaaa.....  | 1   | 0 | seq |
| .....cugacuguuuaauuaaaacaaa.....  | 1   | 0 | seq |
| .....cAgacuguuuaauuaaaacaaa.....  | 1   | 1 | seq |
| .....cAgacuguuuaauuaaaacaaag....  | 1   | 1 | seq |
| .....cCgacuguuuaauuaaaacaaaga...  | 11  | 1 | seq |
| .....cugacuguuuaauuaaaacaaagU...  | 1   | 1 | seq |
| .....cCgacuguuuaauuaaaacaaagaa..  | 2   | 1 | seq |
| .....Ngacuguuuaauuaaaaa.....      | 1   | 1 | seq |
| .....Agacuguuuaauuaaaaa.....      | 2   | 1 | seq |
| .....Ggacuguuuaauuaaaac.....      | 2   | 1 | seq |
| .....ugacuguuuaauuaaaac.....      | 1   | 0 | seq |
| .....ugacuguuuaauuaaaaca.....     | 2   | 0 | seq |
| .....Ngacuguuuaauuaaaaca.....     | 3   | 1 | seq |
| .....Ggacuguuuaauuaaaaca.....     | 3   | 1 | seq |
| .....Agacuguuuaauuaaaacaaa.....   | 1   | 1 | seq |
| .....Ggacuguuuaauuaaaacaaa.....   | 1   | 1 | seq |
| .....ugacuguuuaauuaaaacaCa.....   | 1   | 1 | seq |
| .....Cgacuguuuaauuaaaacaaaga...   | 10  | 1 | seq |
| .....Nacuguuuaauuaaaac.....       | 1   | 1 | seq |
| .....gacugAuuuaauuaaaac.....      | 1   | 1 | seq |
| .....gacuguuuaauuaaaAGc.....      | 2   | 1 | seq |
| .....gGcuguuuaauuaaaac.....       | 2   | 1 | seq |
| .....gacuguuAaauuaaaac.....       | 1   | 1 | seq |
| .....gacugGuuaauuaaaac.....       | 1   | 1 | seq |
| .....gacuguuuaauCaaac.....        | 1   | 1 | seq |
| .....gacuguuuaauuaaaac.....       | 437 | 0 | seq |
| .....gacCguuaauuaaaac.....        | 1   | 1 | seq |
| .....gacuguuuaauuaaaaca.....      | 38  | 0 | seq |
| .....gacuguuuaauuaaaacG.....      | 3   | 1 | seq |
| .....gacuguuuaauuaaaacaa.....     | 4   | 0 | seq |
| .....gacuguuuaauuaaaacaaa.....    | 5   | 0 | seq |
| .....gacuguuuaauuaaaacaaag....    | 5   | 0 | seq |
| .....cuguuuaauuaaaacaaa.....      | 1   | 0 | seq |
| .....uguuuaauuaaaacaaag....       | 1   | 0 | seq |



[illegible]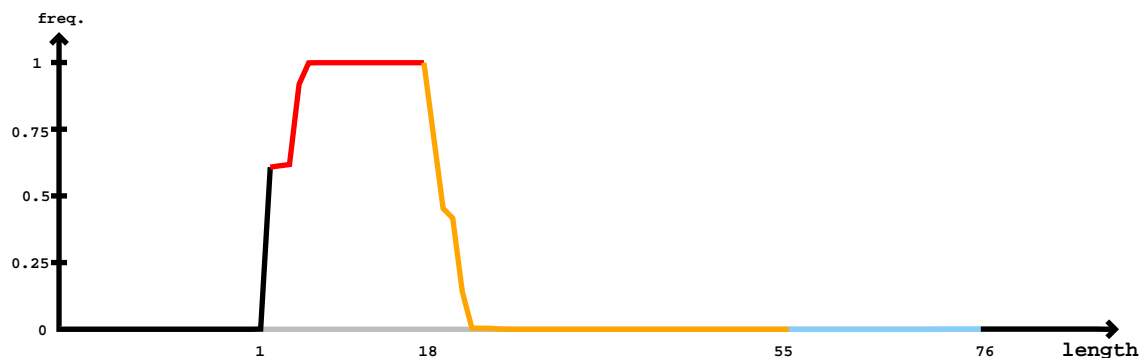

Star

[illegible]

## Mature

## Star

|                                                                              |                         |               |     |
|------------------------------------------------------------------------------|-------------------------|---------------|-----|
| gcgaaauuaucccaaucaacucuguuugucgucuaaguccggucagaaugucugguuuucacagagucgacuagga | uucaauccgcgcacauccggaau | gaauggaaaauuu |     |
| .....ucuguuugucgucuaagucc.....                                               | 73                      | 0             | seq |
| .....ucuguuugucgucuaaguAACg.....                                             | 1                       | 1             | seq |
| .....ucGguugucgucuaaguccg.....                                               | 1                       | 1             | seq |
| .....ucuguuugucgucuaaguccg.....                                              | 38                      | 0             | seq |
| .....ucAguugucgucuaaguccg.....                                               | 3                       | 1             | seq |
| .....ucuguuugCcgucuaaguccg.....                                              | 1                       | 1             | seq |
| .....ucuguuugucgucuaaguccA.....                                              | 2                       | 1             | seq |
| .....ucuguuugucgucuaaguccU.....                                              | 1                       | 1             | seq |
| .....ucuguCgucgucuaaguccg.....                                               | 1                       | 1             | seq |
| .....ucuguuuguAGucuaaguccgg.....                                             | 1                       | 1             | seq |
| .....ucugCugucgucuaaguccgg.....                                              | 1                       | 1             | seq |
| .....ucGguugucgucuaaguccgg.....                                              | 1                       | 1             | seq |
| .....ucuguuugucgucuaaguccgA.....                                             | 2                       | 1             | seq |
| .....ucuguCgucgucuaaguccgg.....                                              | 1                       | 1             | seq |
| .....ucuguuugucgucuaaguccgg.....                                             | 26                      | 0             | seq |
| .....ucuguuugucgucuaaguccggG.....                                            | 1                       | 1             | seq |
| .....ucuguuugucgucuaaguccUggu.....                                           | 1                       | 1             | seq |
| .....ucuguuugucgucuaaguccgggu.....                                           | 8                       | 0             | seq |
| .....ucuguuugucgucuaaguccggguA.....                                          | 1                       | 1             | seq |
| .....ucuguuugucgucuaaguccggguUag.....                                        | 3                       | 1             | seq |
| .....cuguuugucgucuaagucc.....                                                | 2                       | 0             | seq |
| .....cGguugucgucuaaguccg.....                                                | 1                       | 1             | seq |
| .....cuguuugucgucuaaguccg.....                                               | 4                       | 0             | seq |
| .....cuguuugucgucuaaguccgg.....                                              | 1                       | 0             | seq |
| .....uguugucgucuaaguccg.....                                                 | 1                       | 0             | seq |
| .....uguugucgucuaaguccgg.....                                                | 4                       | 0             | seq |
| .....uguugucgucuaaguccgA.....                                                | 1                       | 1             | seq |
| .....AGuugucgucuaaguccgg.....                                                | 1                       | 1             | seq |
| .....guugucgucuaaguccgC.....                                                 | 6                       | 1             | seq |
| .....guugucgucuaaguccgU.....                                                 | 9                       | 1             | seq |
| .....guugucgucCaguccgg.....                                                  | 1                       | 1             | seq |
| .....guuAACgucuaaguccgg.....                                                 | 2                       | 1             | seq |
| .....guugCcgucuaaguccgg.....                                                 | 1                       | 1             | seq |
| .....guugucgucuaaguccgg.....                                                 | 355                     | 0             | seq |
| .....guCgucgucuaaguccgg.....                                                 | 2                       | 1             | seq |
| .....gCugucgucuaaguccgg.....                                                 | 2                       | 1             | seq |
| .....guugucgucuaaguccggA.....                                                | 2                       | 1             | seq |
| .....guugucgucuaaguccggC.....                                                | 12                      | 1             | seq |
| .....guugucgucuaaguccgggu.....                                               | 59                      | 0             | seq |
| .....guugucgucuaaguccggG.....                                                | 2                       | 1             | seq |
| .....guugucgCcuaguccgggu.....                                                | 1                       | 1             | seq |
| .....uCGucgucuaaguccgggu.....                                                | 1                       | 1             | seq |
| .....uugucgucuaaguccggA.....                                                 | 1                       | 1             | seq |
| .....uugucgucuaaguccgggu.....                                                | 98                      | 0             | seq |
| .....uugucgCcuaguccgggu.....                                                 | 1                       | 1             | seq |
| .....uugucgucuaaguccggC.....                                                 | 15                      | 1             | seq |
| .....uugucgucuaaguccggG.....                                                 | 4                       | 1             | seq |
| .....uugucgucuaaguccggguCg.....                                              | 1                       | 1             | seq |
| .....ugucgucuaaguccggguUaga.....                                             | 1                       | 1             | seq |
| .....ggaaugaCuggaaaauu.....                                                  | 1                       | 1             | seq |

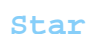[illegible]

## Star

## Mature

|       |                                                                                                          |     |   |     |
|-------|----------------------------------------------------------------------------------------------------------|-----|---|-----|
| aag   | aaguuugaagaguuugaaggcuaaucgaaccaucuuuuggaggcggaagaaguuugaagaguuugaaggcuaaucgaaccaucuuuuggaggcuaggaguuuca |     |   |     |
| ..... | ..aggcuaaucgaaccaucG.....                                                                                | 4   | 1 | seq |
| ..... | ..aggcuaaucgaaccauc.....                                                                                 | 126 | 0 | seq |
| ..... | ..agUcuaaucgaaccauc.....                                                                                 | 16  | 1 | seq |
| ..... | ..aggcuaaucgaaccaucA.....                                                                                | 10  | 1 | seq |
| ..... | ..agCcuaaucgaaccauc.....                                                                                 | 2   | 1 | seq |
| ..... | ..agAcuaaucgaaccaucu.....                                                                                | 48  | 1 | seq |
| ..... | ..agAcuaaucgaaccaucuu.....                                                                               | 2   | 1 | seq |
| ..... | ..agAcuaaucgaaccaucuuu.....                                                                              | 2   | 1 | seq |
| ..... | ..ggcuaaucgaaccaucC.....                                                                                 | 4   | 1 | seq |
| ..... | ..gUcuaaucgaaccauc.....                                                                                  | 2   | 1 | seq |
| ..... | ..ggcuaaucgaaccauc.....                                                                                  | 14  | 0 | seq |
| ..... | ..gCcuaaucgaaccauc.....                                                                                  | 2   | 1 | seq |
| ..... | ..gAcuaaucgaaccaucu.....                                                                                 | 4   | 1 | seq |
| ..... | ..cuaaucgaaccaucuuGu.....                                                                                | 4   | 1 | seq |
| ..... | ..cuaaucgaaccaucCuug.....                                                                                | 2   | 1 | seq |
| ..... | ..ccaucuuCuggaggcg.....                                                                                  | 1   | 1 | seq |
| ..... | .....gaagAcuaaucgaacca.....                                                                              | 22  | 1 | seq |
| ..... | .....gaagAcuaaucgaaccu.....                                                                              | 6   | 1 | seq |
| ..... | .....gaagAcuaaucgaaccauc.....                                                                            | 16  | 1 | seq |
| ..... | .....gaagAcuaaucgaaccauc.....                                                                            | 36  | 1 | seq |
| ..... | .....aagUcuaaucgaaccu.....                                                                               | 2   | 1 | seq |
| ..... | .....aaggcuaaucgaaccu.....                                                                               | 12  | 0 | seq |
| ..... | .....aaggcuaaucgaaccaC.....                                                                              | 4   | 1 | seq |
| ..... | .....aaggcuaaucgaaccaG.....                                                                              | 2   | 1 | seq |
| ..... | .....aaggcuaaucgaaccuU.....                                                                              | 2   | 1 | seq |
| ..... | .....aaggcuaaucgaaccaCc.....                                                                             | 2   | 1 | seq |
| ..... | .....aaggcuaaucgaaccauc.....                                                                             | 28  | 0 | seq |
| ..... | .....aaggcuGaucgaaccauc.....                                                                             | 2   | 1 | seq |
| ..... | .....aagCcuaaucgaaccauc.....                                                                             | 2   | 1 | seq |
| ..... | .....Gaggcuaaucgaaccauc.....                                                                             | 2   | 1 | seq |
| ..... | .....aagUcuaaucgaaccauc.....                                                                             | 4   | 1 | seq |
| ..... | .....aagCcuaaucgaaccauc.....                                                                             | 2   | 1 | seq |
| ..... | .....aaggcuaaucgaaccaucA.....                                                                            | 2   | 1 | seq |
| ..... | .....aaggcuaaucgaaccaucC.....                                                                            | 18  | 1 | seq |
| ..... | .....aagUcuaaucgaaccauc.....                                                                             | 2   | 1 | seq |
| ..... | .....aaggcuGaucgaaccauc.....                                                                             | 2   | 1 | seq |
| ..... | .....aaggcuaaucgaaccauc.....                                                                             | 68  | 0 | seq |
| ..... | .....aaggcCaaucgaaccauc.....                                                                             | 2   | 1 | seq |
| ..... | .....aaggcuaaucgaaccaucG.....                                                                            | 2   | 1 | seq |
| ..... | .....aaggcuaGucgaaccauc.....                                                                             | 2   | 1 | seq |
| ..... | .....aagAcuaaucgaaccaucu.....                                                                            | 32  | 1 | seq |
| ..... | .....aagAcuaaucgaaccaucuu.....                                                                           | 4   | 1 | seq |
| ..... | .....aggcuaaCgaaccauc.....                                                                               | 2   | 1 | seq |
| ..... | .....aggcuaaucgaaccaCc.....                                                                              | 2   | 1 | seq |
| ..... | .....agUcuaaucgaaccauc.....                                                                              | 4   | 1 | seq |
| ..... | .....aggcuaaucgGaccauc.....                                                                              | 2   | 1 | seq |
| ..... | .....aggcuaaUgaaccauc.....                                                                               | 2   | 1 | seq |
| ..... | .....aggcuaaucgaaccauc.....                                                                              | 24  | 0 | seq |
| ..... | .....aggcuaaucgaaccauc.....                                                                              | 126 | 0 | seq |
| ..... | .....aggcuaaucgaaccaucA.....                                                                             | 10  | 1 | seq |
| ..... | .....aggcuaaucgaaccaCcu.....                                                                             | 2   | 1 | seq |
| ..... | .....aggcuaaucgaaccaucC.....                                                                             | 30  | 1 | seq |
| ..... | .....agCcuaaucgaaccauc.....                                                                              | 2   | 1 | seq |
| ..... | .....aggcuaaucgaaccaucG.....                                                                             | 4   | 1 | seq |
| ..... | .....agUcuaaucgaaccauc.....                                                                              | 16  | 1 | seq |
| ..... | .....agAcuaaucgaaccaucu.....                                                                             | 48  | 1 | seq |
| ..... | .....agAcuaaucgaaccaucuu.....                                                                            | 2   | 1 | seq |
| ..... | .....agAcuaaucgaaccaucuuu.....                                                                           | 2   | 1 | seq |
| ..... | .....gCcuaaucgaaccauc.....                                                                               | 2   | 1 | seq |
| ..... | .....gUcuaaucgaaccauc.....                                                                               | 2   | 1 | seq |
| ..... | .....ggcuaaucgaaccaucC.....                                                                              | 4   | 1 | seq |
| ..... | .....ggcuaaucgaaccauc.....                                                                               | 14  | 0 | seq |
| ..... | .....gAcuaaucgaaccaucu.....                                                                              | 4   | 1 | seq |
| ..... | .....cuaaucgaaccaucuuGu.....                                                                             | 4   | 1 | seq |
| ..... | .....cuaaucgaaccaucCuug.....                                                                             | 2   | 1 | seq |

[illegible]

## Star

## Mature

|                                                                                      |              |          |     |  |  |
|--------------------------------------------------------------------------------------|--------------|----------|-----|--|--|
| acccaugauuuucugucugucuagaaccuccuucuccuuccccuucucugugcaacucauuucaaucaauuggauggaagaacc | caagacauagau | gguggagu |     |  |  |
| .....uggGugauggaagaacc.....                                                          | 2            | 1        | seq |  |  |
| .....Aggaugauggaagaacc.....                                                          | 1            | 1        | seq |  |  |
| .....uggaugauggUagaacc.....                                                          | 1            | 1        | seq |  |  |
| .....uggaugauggaGgaacc.....                                                          | 3            | 1        | seq |  |  |
| .....uggaugauggaagaGcc.....                                                          | 2            | 1        | seq |  |  |
| .....Gggaugauggaagaacc.....                                                          | 1            | 1        | seq |  |  |
| .....uggaugauggaagaacG.....                                                          | 2            | 1        | seq |  |  |
| .....uggaugauAgaagaacc.....                                                          | 1            | 1        | seq |  |  |
| .....uggaugauggaaUaacc.....                                                          | 1            | 1        | seq |  |  |
| .....uggaugaCggaagaacc.....                                                          | 2            | 1        | seq |  |  |
| .....uggaCgauggaagaacc.....                                                          | 3            | 1        | seq |  |  |
| .....uggaugauggaagaacc.....                                                          | 782          | 0        | seq |  |  |
| .....uUgaugauggaagaacc.....                                                          | 1            | 1        | seq |  |  |
| .....uggaugauggaagaCcc.....                                                          | 1            | 1        | seq |  |  |
| .....uggaugaugUaagaacc.....                                                          | 1            | 1        | seq |  |  |
| .....uggaGgauggaagaacc.....                                                          | 2            | 1        | seq |  |  |
| .....uggaugauggaagaaccU.....                                                         | 14           | 1        | seq |  |  |
| .....uggaugauggaagaaccG.....                                                         | 55           | 1        | seq |  |  |
| .....uggaugauggaagaaccC.....                                                         | 7            | 0        | seq |  |  |
| .....uggaugauggaagaaccG.....                                                         | 1            | 1        | seq |  |  |
| .....uggaugauggaagaaccAc.....                                                        | 5            | 1        | seq |  |  |
| .....uggaugauggaagaaccAca.....                                                       | 1            | 1        | seq |  |  |
| .....ggaugauggaagaaccG.....                                                          | 17           | 1        | seq |  |  |
| .....ggaugauggaagaaccU.....                                                          | 2            | 1        | seq |  |  |
| .....ggaugauggaagaaccC.....                                                          | 4            | 0        | seq |  |  |
| .....ggaugauggaagaaccAc.....                                                         | 1            | 1        | seq |  |  |
| .....gaugauggaagaaccG.....                                                           | 3            | 1        | seq |  |  |
| .....gaugauggaagaaccC.....                                                           | 1            | 1        | seq |  |  |
| .....gaugauggaagaaccAc.....                                                          | 19           | 1        | seq |  |  |

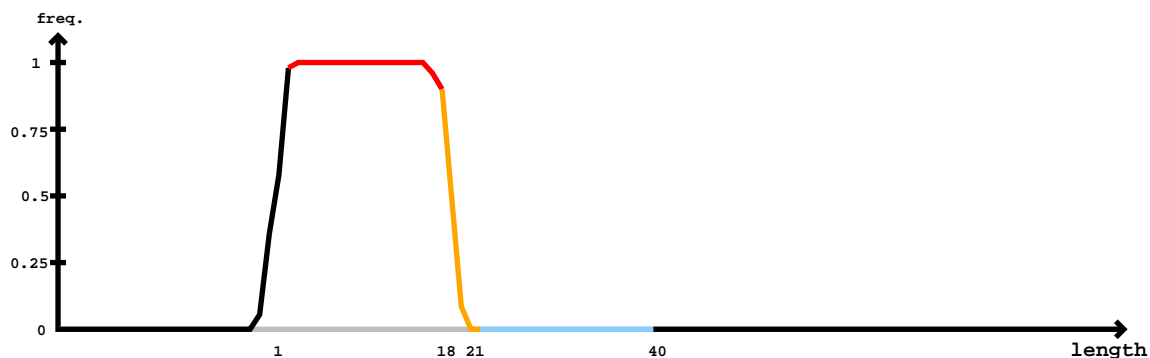

| 5'                                                                                            | ccucgcccauuuguagggagugc <u>uagagcuccuuguccu</u> cu <u>agcagggagcguaauagca</u> cucugugaccagc <u>uu</u> gagggagcaucgauauguugagacaauc <u>u</u> gg | -3' | exp    |  |
|-----------------------------------------------------------------------------------------------|------------------------------------------------------------------------------------------------------------------------------------------------|-----|--------|--|
| .....(((.(((..(((((((..(((((((.....))))))))))....))))))))....(((((((.....))))..))))..))))..)) | reads                                                                                                                                          | mm  | sample |  |
| .....Tugcuagagcuccuuguc.....                                                                  | 3                                                                                                                                              | 1   | seq    |  |
| .....Tugcuagagcuccuugucc.....                                                                 | 3                                                                                                                                              | 1   | seq    |  |
| .....Tugcuagagcuccuuguccu.....                                                                | 4                                                                                                                                              | 1   | seq    |  |
| .....Tugcuagagcuccuuguccuc.....                                                               | 1                                                                                                                                              | 1   | seq    |  |
| .....ugcuagagcuccuuguc.....                                                                   | 4                                                                                                                                              | 0   | seq    |  |
| .....ugcuagagcuccuuguU.....                                                                   | 1                                                                                                                                              | 1   | seq    |  |
| .....ugcuagagcuccuugucc.....                                                                  | 4                                                                                                                                              | 0   | seq    |  |
| .....ugcuagagcuccuUuccu.....                                                                  | 2                                                                                                                                              | 1   | seq    |  |
| .....ugcuagagcuccuuguccu.....                                                                 | 21                                                                                                                                             | 0   | seq    |  |
| .....ugcuagagcuccuuguccC.....                                                                 | 7                                                                                                                                              | 1   | seq    |  |
| .....ugcuagagcuccuuguccCc.....                                                                | 1                                                                                                                                              | 1   | seq    |  |
| .....ugcuagagcuccuuguccuU.....                                                                | 2                                                                                                                                              | 1   | seq    |  |
| .....ugcuagagcuccuuguccuc.....                                                                | 10                                                                                                                                             | 0   | seq    |  |
| .....ugcuagagcuccuugucccG.....                                                                | 1                                                                                                                                              | 1   | seq    |  |
| .....ugcuagagcuccuugucccA.....                                                                | 7                                                                                                                                              | 1   | seq    |  |
| .....gcuagagcuccuUucc.....                                                                    | 1                                                                                                                                              | 1   | seq    |  |
| .....gcuagagcuccuugucc.....                                                                   | 2                                                                                                                                              | 0   | seq    |  |
| .....gcuagagcuccuugucU.....                                                                   | 2                                                                                                                                              | 1   | seq    |  |
| .....gcuagagcuccuuguccu.....                                                                  | 23                                                                                                                                             | 0   | seq    |  |
| .....gcuagagcuccuuguccC.....                                                                  | 1                                                                                                                                              | 1   | seq    |  |
| .....gcuagagcuccuuguccuc.....                                                                 | 7                                                                                                                                              | 0   | seq    |  |
| .....gcuagagcuccuugucccA.....                                                                 | 8                                                                                                                                              | 1   | seq    |  |
| .....cuagagcuccuuguccC.....                                                                   | 9                                                                                                                                              | 1   | seq    |  |
| .....cuagagcuccuugucUu.....                                                                   | 1                                                                                                                                              | 1   | seq    |  |
| .....Nuagagcuccuuguccu.....                                                                   | 1                                                                                                                                              | 1   | seq    |  |
| .....cuagagcuccuuguccu.....                                                                   | 47                                                                                                                                             | 0   | seq    |  |
| .....cAagagcuccuuguccu.....                                                                   | 1                                                                                                                                              | 1   | seq    |  |
| .....cuagagcuccuuguccC.....                                                                   | 1                                                                                                                                              | 1   | seq    |  |
| .....cuagagcuccuUuccu.....                                                                    | 2                                                                                                                                              | 1   | seq    |  |
| .....cuagagcuccuuguccuc.....                                                                  | 13                                                                                                                                             | 0   | seq    |  |
| .....cuagagcuccuuguccuU.....                                                                  | 3                                                                                                                                              | 1   | seq    |  |
| .....cuagagcuccuUuccuc.....                                                                   | 1                                                                                                                                              | 1   | seq    |  |
| .....cuagagcuccuugucccG.....                                                                  | 1                                                                                                                                              | 1   | seq    |  |
| .....uagagcuccuuguccuc.....                                                                   | 4                                                                                                                                              | 0   | seq    |  |

# Mature Star

cccugcccauuguagggagugcuagagcuccuguccuuuagcagggagcguuauagcacucugugaccagcuugagggagcaucgauauguagagacaaucugg



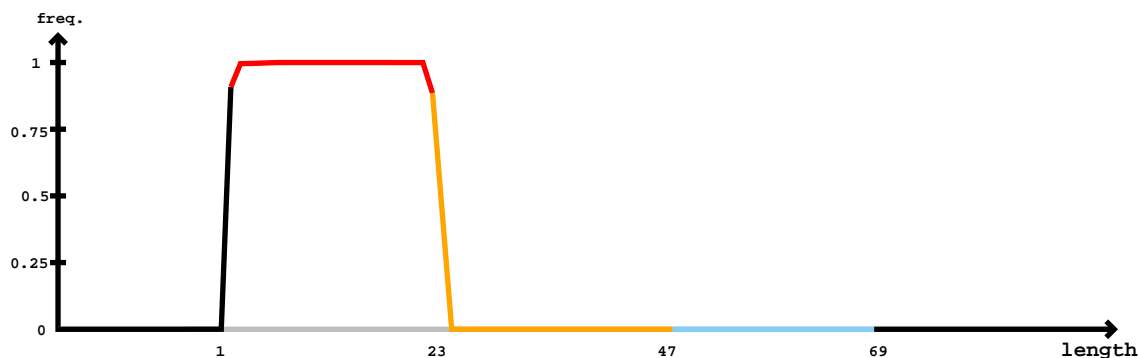

Star

|                                                                                                                | -3'   | exp |        |
|----------------------------------------------------------------------------------------------------------------|-------|-----|--------|
| 5'-ugcauuuacucuccac <u>uucuacaaggcauuuguucucugguu</u> aagggucucugaaccauagagaauaauguccugggaaguguaaagcuaaaucagaa | reads | mm  | sample |
| .(((.((((((.(.(((((((((.((((((((((((((((((..((...)).)))-.))))))))))))-.)))))))).).....                         | 1     | 0   | seq    |
| .....ccacuucuacaaggcauuugu.....                                                                                | 1     | 0   | seq    |
| .....uucuacaaggcauuuguucuc.....                                                                                | 1     | 0   | seq    |
| .....Gucuacaaggcauuuguucuc.....                                                                                | 1     | 1   | seq    |
| .....Aucuacaaggcauuuguucuc.....                                                                                | 2     | 1   | seq    |
| .....Nucuacaaggcauuuguucuc.....                                                                                | 1     | 1   | seq    |
| .....Cucuacaaggcauuuguucuc.....                                                                                | 672   | 1   | seq    |
| .....uucuacaaggcauuuguucucu.....                                                                               | 5     | 0   | seq    |
| .....uucuacaaggcauuuguucucC.....                                                                               | 2     | 1   | seq    |
| .....Cucuacaaggcauuuguucucu.....                                                                               | 4709  | 1   | seq    |
| .....Aucuacaaggcauuuguucucu.....                                                                               | 2     | 1   | seq    |
| .....Nucuacaaggcauuuguucucu.....                                                                               | 6     | 1   | seq    |
| .....Gucuacaaggcauuuguucucu.....                                                                               | 8     | 1   | seq    |
| .....Cucuacaaggcauuuguucucuggu.....                                                                            | 1     | 1   | seq    |
| .....ucuacaaggcauuuguucuc.....                                                                                 | 2     | 0   | seq    |
| .....ucuacaaggcauuuguucuU.....                                                                                 | 2     | 1   | seq    |
| .....uUuacaaggcauuuguucucu.....                                                                                | 1     | 1   | seq    |
| .....ucuauaaggcauuuguucucu.....                                                                                | 1     | 1   | seq    |
| .....ucuacaaggcauuuAgucucu.....                                                                                | 1     | 1   | seq    |
| .....ucuacaaggcauuuguucucC.....                                                                                | 84    | 1   | seq    |
| .....ucuaCGaggcauuuguucucu.....                                                                                | 1     | 1   | seq    |
| .....ucuacaaggcauuCGuucucu.....                                                                                | 1     | 1   | seq    |
| .....ucCaaggcauuuguucucu.....                                                                                  | 1     | 1   | seq    |
| .....ucuacaaggcaCuuguucucu.....                                                                                | 1     | 1   | seq    |
| .....ucuacaaggcauuuguucucA.....                                                                                | 7     | 1   | seq    |
| .....ucuacaGGgcauuuguucucu.....                                                                                | 2     | 1   | seq    |
| .....ucuacaaggcauuuguucCc.....                                                                                 | 1     | 1   | seq    |
| .....ucuacaaggcauCguucucu.....                                                                                 | 1     | 1   | seq    |
| .....ucuacaaggcauuuguucucu.....                                                                                | 397   | 0   | seq    |
| .....ucuacaaggcauuuguucucG.....                                                                                | 14    | 1   | seq    |
| .....Acuacaaggcauuuguucucu.....                                                                                | 2     | 1   | seq    |
| .....ucuacaaggcGuuguucucu.....                                                                                 | 2     | 1   | seq    |
| .....cuacaaggcauuuguucu.....                                                                                   | 1     | 0   | seq    |
| .....cuacaaggcauuuguucucG.....                                                                                 | 2     | 1   | seq    |
| .....cuacaaggcauuuguucucu.....                                                                                 | 3     | 0   | seq    |

| Mature           |                                                                          | Star                    |   |   |  |     |
|------------------|--------------------------------------------------------------------------|-------------------------|---|---|--|-----|
| ugcaauuacucuccac | uucuaacaaggcauuuuguucucugguuaaaggucuuucugaaaccauagagaauaaauguccuguggaagu | ugaaguaaaugcuauaaucagaa |   |   |  |     |
| .....            | uacaaggcauuuuguucucu.....                                                |                         | 5 | 0 |  | seq |
| .....            | acaagAcauuuguucuc.....                                                   |                         | 1 | 1 |  | seq |
| .....            | acaaggcauuuuguucucC.....                                                 |                         | 3 | 1 |  | seq |
| .....            | acaaggcauuuuguucucu.....                                                 |                         | 5 | 0 |  | seq |
| .....            | caaggcauuuuguucucC.....                                                  |                         | 2 | 1 |  | seq |
| .....            | caaggcauuuuguucucu.....                                                  |                         | 4 | 0 |  | seq |

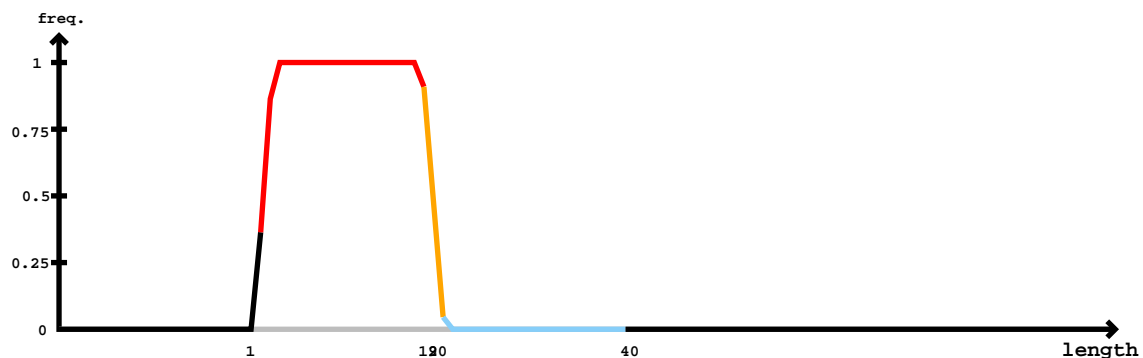

| Mature |                                                                                       | Star               |                      |                                                 |       |     |        |
|--------|---------------------------------------------------------------------------------------|--------------------|----------------------|-------------------------------------------------|-------|-----|--------|
| 5'     | uuuuuucacucucucacuccu                                                                 | uuuuuuuugggguaccuu | caaccuuuuuggagaaaggg | uuuggaagaguuuaguuuaggguguuugagaacucuuaguuuuuuuu | -3'   | exp |        |
|        | .....((((((((((((((((((.....)))))).).)))))))).).))))))((((((.....)))))).).))))))..... |                    |                      |                                                 | reads | mm  | sample |
|        | .....Guuucuuugggguacc.....                                                            |                    |                      |                                                 | 1     | 1   | seq    |
|        | .....cuuucuuugAugguacc.....                                                           |                    |                      |                                                 | 1     | 1   | seq    |
|        | .....Guuucuuugggguaccu.....                                                           |                    |                      |                                                 | 4     | 1   | seq    |
|        | .....Guuucuuugggguaccuu.....                                                          |                    |                      |                                                 | 2     | 1   | seq    |
|        | .....uuucuuugCugguaccu.....                                                           |                    |                      |                                                 | 1     | 1   | seq    |
|        | .....uuucuuugggguaccu.....                                                            |                    |                      |                                                 | 3     | 0   | seq    |
|        | .....uuucuuugggguaccuu.....                                                           |                    |                      |                                                 | 4     | 0   | seq    |
|        | .....uuucuuugUugguaccuu.....                                                          |                    |                      |                                                 | 1     | 1   | seq    |
|        | .....Guuucuuugggguaccuu.....                                                          |                    |                      |                                                 | 1     | 1   | seq    |
|        | .....uuucuuugggguaccuA.....                                                           |                    |                      |                                                 | 1     | 1   | seq    |
|        | .....uuucuuugggguaccuu.....                                                           |                    |                      |                                                 | 2     | 0   | seq    |
|        | .....uuucuuugggguaccuuA.....                                                          |                    |                      |                                                 | 1     | 1   | seq    |

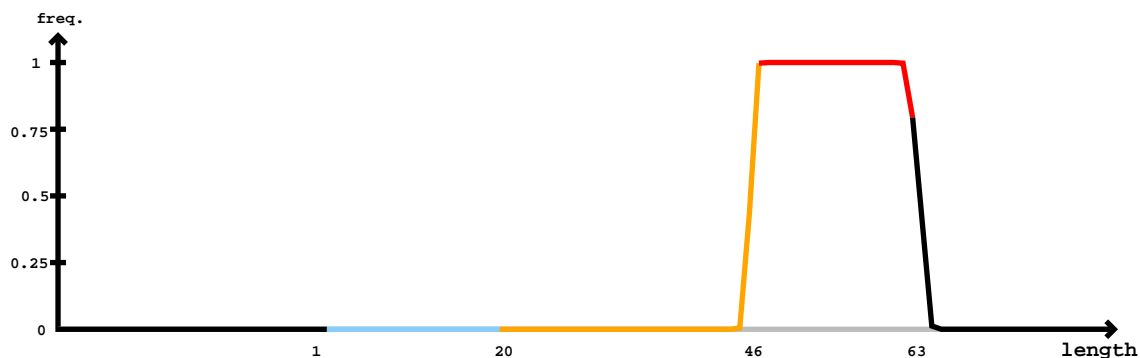

**Mature**

| 5'                                                                                               | agcacagugcaccuauugcguuguguugccuucugaguuuccaggagggccgauaguuuagaggcuuuguuggaacccugaacagacgaugaaccuccgggucacucaaa | -3' | exp    |
|--------------------------------------------------------------------------------------------------|----------------------------------------------------------------------------------------------------------------|-----|--------|
| .....((((((((.....(.((((.....(((.....(((((((.....((.....)).....)))))).....)))))).....))))))..... | reads                                                                                                          | mm  | sample |
| .....Cuuggaaccucgaacag.....                                                                      | 1                                                                                                              | 1   | seq    |
| .....guuggaaccucgaacagacC.....                                                                   | 1                                                                                                              | 1   | seq    |
| .....uuggaaccucgaacagU.....                                                                      | 1                                                                                                              | 1   | seq    |
| .....uuggaaccucgaacaga.....                                                                      | 82                                                                                                             | 0   | seq    |
| .....uuggaaccucgaacagac.....                                                                     | 33                                                                                                             | 0   | seq    |
| .....uuggaaccucCgaacagac.....                                                                    | 1                                                                                                              | 1   | seq    |
| .....uuggaaccucgaacagacC.....                                                                    | 40                                                                                                             | 1   | seq    |
| .....uuggaaccucgaacagacG.....                                                                    | 12                                                                                                             | 1   | seq    |
| .....uuggaaccucgaacGgaca.....                                                                    | 1                                                                                                              | 1   | seq    |
| .....uuggaaccucgaacagaca.....                                                                    | 4                                                                                                              | 0   | seq    |
| .....uuggaaccucgaacagacUu.....                                                                   | 1                                                                                                              | 1   | seq    |
| .....uggaaccucgaacGgac.....                                                                      | 1                                                                                                              | 1   | seq    |
| .....uggaaccucgaGcagac.....                                                                      | 1                                                                                                              | 1   | seq    |
| .....uggaaccucgaacagac.....                                                                      | 162                                                                                                            | 0   | seq    |
| .....uAgaaccucgaacagac.....                                                                      | 1                                                                                                              | 1   | seq    |
| .....uggaaccucgaacagaca.....                                                                     | 21                                                                                                             | 0   | seq    |
| .....uggaaccucgaacagacG.....                                                                     | 39                                                                                                             | 1   | seq    |
| .....uggaaccucgUacagaca.....                                                                     | 1                                                                                                              | 1   | seq    |
| .....uggaaccucgaacagacGu.....                                                                    | 1                                                                                                              | 1   | seq    |
| .....uggaaccucgaacagacaG.....                                                                    | 3                                                                                                              | 1   | seq    |
| .....ggaaccucgaacagaca.....                                                                      | 1                                                                                                              | 0   | seq    |

A diagram of a complex RNA secondary structure. The molecule consists of several stems connected by loops. On the left, there are two circular structures: one at the top with red nucleotides (G, A, A, A, A, A) and one at the bottom with purple nucleotides (C, A, C, G, U, A). These are connected to a central linear stem-loop structure. The central part features a long double-stranded stem with various base pairs (U-A, U-G, C-C, A-U, U-G, A-C, G-A, U-G, A-C, U-U) and several internal loops. To the right, another circular structure is formed by orange nucleotides (A, G, G, G, C, U, A, U, U, A, U, U). The 5' and 3' ends are indicated on the left side of the diagram.

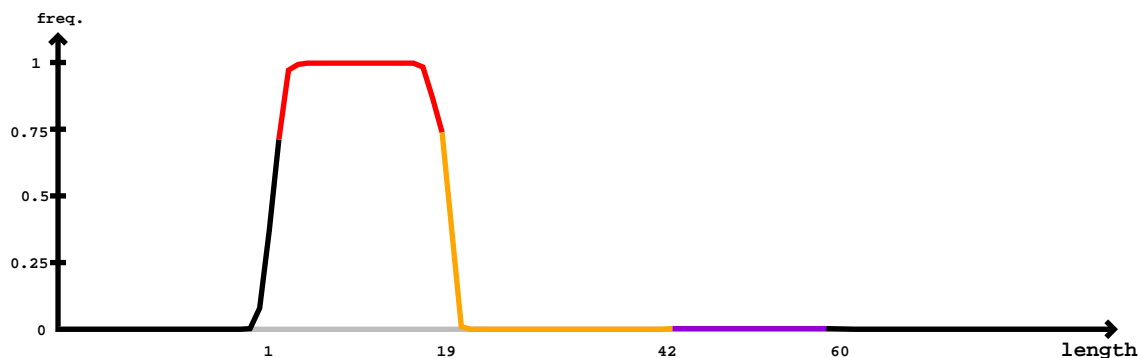

Star

[illegible]

Mature

Star

|                        |   |                     |               |               |       |           |           |   |         |                               |     |   |     |
|------------------------|---|---------------------|---------------|---------------|-------|-----------|-----------|---|---------|-------------------------------|-----|---|-----|
| aagagcacaacaaaugggagug | g | aaaaaaaauuagagugcau | a             | acauagggguuuu | a     | auguucagu | agcagucua | a | caugcca | caugucucagguaacucuauagagagugc |     |   |     |
| .....                  |   | aaaaaa              | uuagagugcU    | u             | ..... |           |           |   |         |                               | 102 | 1 | seq |
| .....                  |   | aaaaaa              | uuagagugcU    | ua            | ..... |           |           |   |         |                               | 2   | 1 | seq |
| .....                  |   | aaaaaa              | uuagagugcaCa  | .....         |       |           |           |   |         |                               | 1   | 1 | seq |
| .....                  |   | aaaaaa              | uuagagugcU    | ua            | ..... |           |           |   |         |                               | 5   | 1 | seq |
| .....                  |   | aaaaaa              | uuagagugcaCa  | .....         |       |           |           |   |         |                               | 1   | 1 | seq |
| .....                  |   | aaaaaa              | uuagagugcauG  | .....         |       |           |           |   |         |                               | 1   | 1 | seq |
| .....                  |   | aaaaaa              | uuagagugcU    | ua            | ..... |           |           |   |         |                               | 1   | 1 | seq |
| .....                  |   | aaaaaa              | uuagagugcaCaa | .....         |       |           |           |   |         |                               | 1   | 1 | seq |
| .....                  |   | aaaaaa              | uuagagugcU    | ua            | ..... |           |           |   |         |                               | 2   | 1 | seq |
| .....                  |   |                     |               |               |       |           | agGagucua | a | caugcca | .....                         | 1   | 1 | seq |

Provisional ID : MA\_9369212\_36609  
 Score total : 1.5  
 Score for star read(s) : -1.3  
 Score for read counts : 0  
 Score for mfe : 1.2  
 Score for randfold : 1.6  
 Score for cons. seed :  
 Total read count : 41213  
 Mature read count : 41213  
 Loop read count : 0  
 Star read count : 0

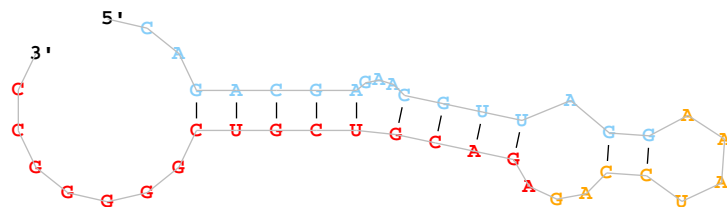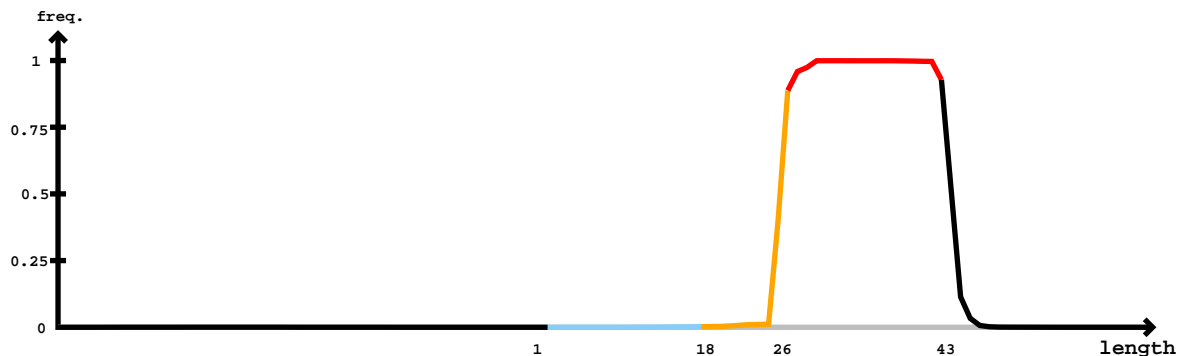

|                                                                                                              |  | Star |  | Mature |  |     |     |       |           |
|--------------------------------------------------------------------------------------------------------------|--|------|--|--------|--|-----|-----|-------|-----------|
| 5'                                                                                                           |  |      |  |        |  | -3' | exp |       |           |
| gaacaucaaaaagggaucaggguuaauauuccaaaugggaacauagguggagacgagaacguaggaaauccagagacgucgucgggggcccgugaagaguuauuuuuu |  |      |  |        |  |     |     | reads | mm sample |
| .....(((((((.....((((((((.....))))))(((((((.....(((((((.....)))))).....)))))).....)))))).....)))))).....     |  |      |  |        |  |     |     | 1     | 1 seq     |
| ..acaucaaaaagggaucGgguu.....                                                                                 |  |      |  |        |  |     |     | 1     | 1 seq     |
| ..acaucaaaaagggaucGgguuaaua.....                                                                             |  |      |  |        |  |     |     | 2     | 1 seq     |
| ..caucaaaaagggaucGggu.....                                                                                   |  |      |  |        |  |     |     | 1     | 1 seq     |
| ..caucaaaaagggaucGgguu.....                                                                                  |  |      |  |        |  |     |     | 2     | 1 seq     |
| .....caaaaagggaucGggu.....                                                                                   |  |      |  |        |  |     |     | 1     | 1 seq     |
| .....agggaucGgguuaauauucca.....                                                                              |  |      |  |        |  |     |     | 2     | 1 seq     |
| .....ggaucGgguuaauauucca.....                                                                                |  |      |  |        |  |     |     | 1     | 1 seq     |
| .....aaucGgguuaauauucca.....                                                                                 |  |      |  |        |  |     |     | 1     | 1 seq     |
| .....Gacguaggaaauccag.....                                                                                   |  |      |  |        |  |     |     | 3     | 1 seq     |
| .....Gacguaggaaauccaga.....                                                                                  |  |      |  |        |  |     |     | 1     | 1 seq     |
| .....Gacguaggaaauccagag.....                                                                                 |  |      |  |        |  |     |     | 1     | 1 seq     |
| .....acguaggaaauccaga.....                                                                                   |  |      |  |        |  |     |     | 4     | 0 seq     |
| .....acguaggaaauccagag.....                                                                                  |  |      |  |        |  |     |     | 1     | 0 seq     |
| .....acguaggaaauccUgag.....                                                                                  |  |      |  |        |  |     |     | 2     | 1 seq     |
| .....acguaggaaauccagagacgucgucggg.....                                                                       |  |      |  |        |  |     |     | 1     | 0 seq     |
| .....cguaggaaauccagag.....                                                                                   |  |      |  |        |  |     |     | 1     | 0 seq     |
| .....cguaggaaauccUgag.....                                                                                   |  |      |  |        |  |     |     | 1     | 1 seq     |
| .....cguaggaaauccagaga.....                                                                                  |  |      |  |        |  |     |     | 1     | 0 seq     |
| .....cguaggaaauccagagac.....                                                                                 |  |      |  |        |  |     |     | 1     | 0 seq     |
| .....cguaggaaauccUgagacguc.....                                                                              |  |      |  |        |  |     |     | 1     | 1 seq     |
| .....cguaggaaauccagagacgucgucgggggcc.....                                                                    |  |      |  |        |  |     |     | 1     | 0 seq     |
| .....cguaggaaauccUgagacgucgucgggggcc.....                                                                    |  |      |  |        |  |     |     | 1     | 1 seq     |
| .....cguaggaaauccagagacgucgucgggggccU.....                                                                   |  |      |  |        |  |     |     | 2     | 1 seq     |
| .....guuaggaaauccagaga.....                                                                                  |  |      |  |        |  |     |     | 1     | 0 seq     |
| .....guuaggaaauccagagacguc.....                                                                              |  |      |  |        |  |     |     | 1     | 0 seq     |
| .....guuaggaaauccagagacgucgucgggggccA.....                                                                   |  |      |  |        |  |     |     | 1     | 1 seq     |
| .....guuaggaaauccagagacgucgucgggggccU.....                                                                   |  |      |  |        |  |     |     | 1     | 1 seq     |
| .....uuaggaaauccagagacgucgucgg.....                                                                          |  |      |  |        |  |     |     | 1     | 0 seq     |
| .....uuaggaaauccagagacgucgucgggggcc.....                                                                     |  |      |  |        |  |     |     | 1     | 0 seq     |
| .....uuaggaaauccagagacgucgucgggggccU.....                                                                    |  |      |  |        |  |     |     | 1     | 1 seq     |
| .....uuaggaaauccagagacgucgucgggggccUg.....                                                                   |  |      |  |        |  |     |     | 2     | 1 seq     |
| .....uaggaaauccagagacg.....                                                                                  |  |      |  |        |  |     |     | 2     | 0 seq     |

Star

Mature

gaacaucaaaagggaucagguuauuuccaaaugggaacaugggucagacgagaaacguuaggaaauccagagacgucgucgggggccccgugaagaguuaucuuuuau

|                                             |   |   |     |
|---------------------------------------------|---|---|-----|
| .....uaggaaauccCgagacg.....                 | 1 | 1 | seq |
| .....uaggaaauccagagacgu.....                | 1 | 0 | seq |
| .....uaggaaauccagagacgucg.....              | 1 | 0 | seq |
| .....uaggaaauccagagacgucgucg.....           | 1 | 0 | seq |
| .....uaggaaauccagagacgucgucgggg.....        | 1 | 0 | seq |
| .....uaggaaauccagagacgucgucgggggc.....      | 1 | 0 | seq |
| .....uaggaaauccUgagacgucgucgggggcc.....     | 1 | 1 | seq |
| .....uaggaaauccagagacgucgucgggggccU.....    | 1 | 1 | seq |
| .....uaggaaauccagagacgucgucgggggcc.....     | 5 | 0 | seq |
| .....uaggaaauccagagacgucgucgggggcccc.....   | 2 | 0 | seq |
| .....uaggaaauccagagacgucgucgggggccccU.....  | 3 | 1 | seq |
| .....uaggaaauccagagacgucgucgggggccccUg..... | 2 | 1 | seq |
| .....aggaaauccagagacgucg.....               | 1 | 0 | seq |
| .....aggaaauccCgagacgucgucgg.....           | 1 | 1 | seq |
| .....aggaaauccagagacgucgucggg.....          | 1 | 0 | seq |
| .....aggaaauccUgagacgucgucgggggcc.....      | 1 | 1 | seq |
| .....aggaaauccagagacgucgucgggggccG.....     | 1 | 1 | seq |
| .....ggaaauccagagacgC.....                  | 1 | 1 | seq |
| .....ggaaauccagagacgucgu.....               | 1 | 0 | seq |
| .....ggaaauccUgagacgucgucgggg.....          | 1 | 1 | seq |
| .....ggaaauccCgagacgucgucgggg.....          | 1 | 1 | seq |
| .....ggaaauccagagacgucgucgggggc.....        | 2 | 0 | seq |
| .....ggaaauccagagacgucgucgggggcc.....       | 3 | 0 | seq |
| .....ggaaauccagagacgucgucgggggcccc.....     | 3 | 0 | seq |
| .....ggaaauccCgagacgucgucgggggcccc.....     | 1 | 1 | seq |
| .....ggaaauccagagacgucgucgggggccccU.....    | 2 | 1 | seq |
| .....ggaaauccagagacgucgucgggggccccUg.....   | 4 | 1 | seq |
| .....gaaauccUgagacgucgucggg.....            | 1 | 1 | seq |
| .....gaaauccagagacgucgucggg.....            | 1 | 0 | seq |
| .....gaaauccCgagacgucgucggg.....            | 1 | 1 | seq |
| .....gaaauccagagacgucgucgggggcc.....        | 1 | 0 | seq |
| .....gaaauccagagacgucgucggggggcccc.....     | 6 | 0 | seq |
| .....gaaauccagagacgucgucggggggccccU.....    | 1 | 1 | seq |
| .....gaaauccagagacgucgucggggggccccUg.....   | 2 | 1 | seq |
| .....aaauccagagacgucgucgg.....              | 1 | 0 | seq |
| .....aaauccUgagacgucgucggg.....             | 1 | 1 | seq |
| .....aaauccCgagacgucgucgggg.....            | 2 | 1 | seq |
| .....aaauccagagacgucgucggggg.....           | 2 | 0 | seq |
| .....Gaauccagagacgucgucgggggcc.....         | 1 | 1 | seq |
| .....aaauccagagacgucgucgggggcU.....         | 2 | 1 | seq |
| .....aaauccagagacgucgucgggggcA.....         | 1 | 1 | seq |
| .....aaauccagagacgucgucgggggcc.....         | 1 | 0 | seq |
| .....aaauccUgagacgucgucggggggcc.....        | 2 | 1 | seq |
| .....aaauccagagacgucgucggggggccA.....       | 1 | 1 | seq |
| .....aaauccagagacgucgucggggggcccc.....      | 3 | 0 | seq |
| .....aaauccagagacgucgucggggggccccU.....     | 1 | 1 | seq |
| .....aaauccagagacgucgucggggggccccG.....     | 1 | 1 | seq |
| .....aauccUgagacgucgucg.....                | 1 | 1 | seq |
| .....aGuccagagacgucgucgg.....               | 1 | 1 | seq |
| .....aauccagagacgucgucgggg.....             | 3 | 0 | seq |
| .....aauccagagacgucgucggggg.....            | 2 | 0 | seq |
| .....aauccagagacgucgucgggggc.....           | 2 | 0 | seq |
| .....aauccUgagacgucgucgggggc.....           | 1 | 1 | seq |
| .....aauccagagacgucgucgggggcU.....          | 1 | 1 | seq |
| .....aauccCgagacgucgucgggggcc.....          | 1 | 1 | seq |
| .....aauccUgagacgucgucggggggcc.....         | 1 | 1 | seq |
| .....aauccagagacgucgucggggggcccc.....       | 5 | 0 | seq |
| .....aauccagagacgucgucggggggcccc.....       | 3 | 0 | seq |
| .....Nauccagagacgucgucggggggcccc.....       | 1 | 1 | seq |
| .....aauccUgagacgucgucggggggcccc.....       | 1 | 1 | seq |
| .....aauccagagacgucgucggggggccccU.....      | 2 | 1 | seq |
| .....aauccagagacgucgucggggggccccUg.....     | 4 | 1 | seq |
| .....auccagagacgucgucg.....                 | 1 | 0 | seq |
| .....auccagagacgucgucgU.....                | 1 | 1 | seq |
| .....auccagagacgucgucgg.....                | 3 | 0 | seq |
| .....auccCgagacgucgucgg.....                | 1 | 1 | seq |
| .....auccUgagacgucgucgg.....                | 1 | 1 | seq |
| .....auccagagacgucgucggg.....               | 5 | 0 | seq |
| .....auccagagacgucgucgggg.....              | 4 | 0 | seq |
| .....auccagagacgucgucggggg.....             | 4 | 0 | seq |



| Star                                                                                                             | Mature |   |     |  |
|------------------------------------------------------------------------------------------------------------------|--------|---|-----|--|
| gaacaucaaaaagggaauucagguuauuucccaaauggggaacaugggucagacgagaaacguuaggaaauccagagacgucgucgggggcccgugaagaguuaucuuuuau |        |   |     |  |
| .....auccagagacgucgucggggCc.....                                                                                 | 1      | 1 | seq |  |
| .....auccagagacgucgucgggggc.....                                                                                 | 2      | 0 | seq |  |
| .....auccCgagacgucgucgggggc.....                                                                                 | 3      | 1 | seq |  |
| .....auccUgagacgucgucgggggc.....                                                                                 | 2      | 1 | seq |  |
| .....auccagagacgucgucgggggcA.....                                                                                | 3      | 1 | seq |  |
| .....auccagagacgucgucgggggcc.....                                                                                | 13     | 0 | seq |  |
| .....auccCgagacgucgucgggggcc.....                                                                                | 2      | 1 | seq |  |
| .....auccUgagacgucgucgggggcc.....                                                                                | 4      | 1 | seq |  |
| .....auccagagacgucgucgggggcU.....                                                                                | 3      | 1 | seq |  |
| .....auccagagacgucgucggggggccA.....                                                                              | 1      | 1 | seq |  |
| .....auccUgagacgucgucggggggccc.....                                                                              | 1      | 1 | seq |  |
| .....auccagagacgucgucggggggccc.....                                                                              | 6      | 0 | seq |  |
| .....auccagagacgucgucggggggcccU.....                                                                             | 6      | 1 | seq |  |
| .....auccagagacgucgucggggggcccUg.....                                                                            | 2      | 1 | seq |  |
| .....auccagagacgucgucggggggcccUgu.....                                                                           | 1      | 1 | seq |  |
| .....uccCgagacgucgucgg.....                                                                                      | 1      | 1 | seq |  |
| .....uccUgagacgucgucgg.....                                                                                      | 3      | 1 | seq |  |
| .....uccagagacgucgucgg.....                                                                                      | 6      | 0 | seq |  |
| .....uccagagacgucgucggA.....                                                                                     | 1      | 1 | seq |  |
| .....uccUgagacgucgucggg.....                                                                                     | 2      | 1 | seq |  |
| .....uccagagacgucgucggg.....                                                                                     | 3      | 0 | seq |  |
| .....uccagagacgucgucgggg.....                                                                                    | 7      | 0 | seq |  |
| .....uccUgagacgucgucgggg.....                                                                                    | 1      | 1 | seq |  |
| .....uccCgagacgucgucgggg.....                                                                                    | 1      | 1 | seq |  |
| .....uccUgagacgucgucggggg.....                                                                                   | 2      | 1 | seq |  |
| .....uccagagacgucgucggggg.....                                                                                   | 1      | 0 | seq |  |
| .....uccCgagacgucgucggggg.....                                                                                   | 1      | 1 | seq |  |
| .....uccagagacgucgucgggggG.....                                                                                  | 1      | 1 | seq |  |
| .....uccagagacgucgucgggggU.....                                                                                  | 1      | 1 | seq |  |
| .....uccUgagacgucgucgggggc.....                                                                                  | 3      | 1 | seq |  |
| .....uccagagacgucgucgggggc.....                                                                                  | 5      | 0 | seq |  |
| .....uccagagacgucgucgggggcU.....                                                                                 | 6      | 1 | seq |  |
| .....uccUgagacgucgucggggggcc.....                                                                                | 9      | 1 | seq |  |
| .....uccagagacgucgucggggggccc.....                                                                               | 11     | 0 | seq |  |
| .....uccCgagacgucgucggggggccc.....                                                                               | 3      | 1 | seq |  |
| .....uccagagacgucgucgggggCcc.....                                                                                | 1      | 1 | seq |  |
| .....uccagagacgucgucggggggccc.....                                                                               | 9      | 0 | seq |  |
| .....uccagGgacgucgucggggggccc.....                                                                               | 1      | 1 | seq |  |
| .....uccUgagacgucgucggggggccc.....                                                                               | 5      | 1 | seq |  |
| .....uccagagacgucgucggggggAcc.....                                                                               | 1      | 1 | seq |  |
| .....uccagagacgucgucggggggccccc.....                                                                             | 3      | 0 | seq |  |
| .....uccagagacgucgucggggggcccA.....                                                                              | 1      | 1 | seq |  |
| .....uccagagacgucgucggggggcccU.....                                                                              | 5      | 1 | seq |  |
| .....uccagagacgCcgucggggggccccc.....                                                                             | 1      | 1 | seq |  |
| .....uccUgagacgucgucggggggccccc.....                                                                             | 1      | 1 | seq |  |
| .....uccagagacgucgucggggggcccUg.....                                                                             | 9      | 1 | seq |  |
| .....uccGgagacgucgucggggggcccccug.....                                                                           | 2      | 1 | seq |  |
| .....ccUgagacgucgucggg.....                                                                                      | 2      | 1 | seq |  |
| .....ccagagacgucgucggg.....                                                                                      | 5      | 0 | seq |  |
| .....ccCgagacgucgucggg.....                                                                                      | 1      | 1 | seq |  |
| .....ccagagacgucgucgggg.....                                                                                     | 10     | 0 | seq |  |
| .....ccagagacgucgucggAg.....                                                                                     | 1      | 1 | seq |  |
| .....ccCgagacgucgucgggg.....                                                                                     | 2      | 1 | seq |  |
| .....ccagagacgucgucggggg.....                                                                                    | 1      | 0 | seq |  |
| .....ccUgagacgucgucggggg.....                                                                                    | 1      | 1 | seq |  |
| .....ccagagacgucgucggggggc.....                                                                                  | 3      | 0 | seq |  |
| .....ccUgagacgucgucggggggc.....                                                                                  | 1      | 1 | seq |  |
| .....ccagagacgGcgucggggggc.....                                                                                  | 1      | 1 | seq |  |
| .....ccagagacgucgucggggggcc.....                                                                                 | 8      | 0 | seq |  |
| .....ccagagacgucgucggggggcU.....                                                                                 | 5      | 1 | seq |  |
| .....ccCgagacgucgucggggggcc.....                                                                                 | 1      | 1 | seq |  |
| .....ccagaAacgucgucggggggcc.....                                                                                 | 1      | 1 | seq |  |
| .....ccagagacgucgucggggggcA.....                                                                                 | 3      | 1 | seq |  |
| .....ccUgagacgucgucggggggcc.....                                                                                 | 4      | 1 | seq |  |
| .....ccUgagacgucgucggggggccc.....                                                                                | 7      | 1 | seq |  |
| .....ccagagacgucgucggggggccc.....                                                                                | 14     | 0 | seq |  |
| .....ccagagacgucgucggggggccG.....                                                                                | 1      | 1 | seq |  |
| .....ccagagacgucgucggggggccA.....                                                                                | 3      | 1 | seq |  |
| .....ccCgagacgucgucggggggccc.....                                                                                | 2      | 1 | seq |  |
| .....Gcagagacgucgucggggggccc.....                                                                                | 1      | 1 | seq |  |

| Star                                              | Mature             |            |                     |                       |
|---------------------------------------------------|--------------------|------------|---------------------|-----------------------|
| gaacaucaaaagggaauucagguuauuucccaaauggggaacauggugg | cagacgagaaacguuagg | aaauccagag | agacgucgucggggggccc | ccgugaagaguuaucuuuuau |
| .....ccagagacgucgucggggggcccU.....                | 6                  | 1          | seq                 |                       |
| .....ccCgagacgucgucggggggcccc.....                | 1                  | 1          | seq                 |                       |
| .....ccagagacgucgucggggggcccc.....                | 2                  | 0          | seq                 |                       |
| .....ccUgagacgucgucggggggcccc.....                | 1                  | 1          | seq                 |                       |
| .....ccagagacgucgucggggggccccUg.....              | 4                  | 1          | seq                 |                       |
| .....ccagagacgucgucggggggccccUgu.....             | 1                  | 1          | seq                 |                       |
| .....cCgagacgucgucggggg.....                      | 1                  | 1          | seq                 |                       |
| .....cCgagacgucgucggggg.....                      | 1                  | 1          | seq                 |                       |
| .....cCgagacgucgucggggggc.....                    | 1                  | 1          | seq                 |                       |
| .....cUgagacgucgucggggggcc.....                   | 6                  | 1          | seq                 |                       |
| .....cagagacgucgucggggggcA.....                   | 1                  | 1          | seq                 |                       |
| .....cCgagacgucgucggggggcc.....                   | 1                  | 1          | seq                 |                       |
| .....cagagacgucgucggggggcc.....                   | 7                  | 0          | seq                 |                       |
| .....cagagacgucgucggggggcU.....                   | 1                  | 1          | seq                 |                       |
| .....cUgagacgucgucggggggcccc.....                 | 1                  | 1          | seq                 |                       |
| .....cCgagacgucgucggggggcccc.....                 | 1                  | 1          | seq                 |                       |
| .....cagagacgucgucggggggcccc.....                 | 3                  | 0          | seq                 |                       |
| .....cagagacgucgucggggggccccU.....                | 2                  | 1          | seq                 |                       |
| .....cagagacgucgucggggggccccUg.....               | 2                  | 1          | seq                 |                       |
| .....cagagacgucgucggggggccccGg.....               | 1                  | 1          | seq                 |                       |
| .....agaUacgucgucgggggg.....                      | 1                  | 1          | seq                 |                       |
| .....aAagacgucgucgggggg.....                      | 1                  | 1          | seq                 |                       |
| .....agagacgucgucgggggg.....                      | 2                  | 0          | seq                 |                       |
| .....Ngagacgucgucggggggc.....                     | 2                  | 1          | seq                 |                       |
| .....agagacgucgucggggggU.....                     | 1                  | 1          | seq                 |                       |
| .....Cgagacgucgucggggggc.....                     | 1                  | 1          | seq                 |                       |
| .....agagacgucgucggggggc.....                     | 1                  | 0          | seq                 |                       |
| .....Ugagacgucgucggggggc.....                     | 1                  | 1          | seq                 |                       |
| .....Ngagacgucgucggggggccc.....                   | 6                  | 1          | seq                 |                       |
| .....Ugagacgucgucggggggccc.....                   | 4                  | 1          | seq                 |                       |
| .....agagacgucgucggggggccc.....                   | 8                  | 0          | seq                 |                       |
| .....Cgagacgucgucggggggccc.....                   | 1                  | 1          | seq                 |                       |
| .....agagacgucgucggggggcU.....                    | 1                  | 1          | seq                 |                       |
| .....Ugagacgucgucggggggcccc.....                  | 3                  | 1          | seq                 |                       |
| .....agUgacgucgucggggggcccc.....                  | 1                  | 1          | seq                 |                       |
| .....agagCcgucgucggggggcccc.....                  | 1                  | 1          | seq                 |                       |
| .....Ngagacgucgucggggggcccc.....                  | 3                  | 1          | seq                 |                       |
| .....Cgagacgucgucggggggcccc.....                  | 1                  | 1          | seq                 |                       |
| .....agagacgucgucggggggcccc.....                  | 4                  | 0          | seq                 |                       |
| .....agagacgucgucggggggccccA.....                 | 1                  | 1          | seq                 |                       |
| .....agagacgucgucggggggccccU.....                 | 1                  | 1          | seq                 |                       |
| .....agagacgucgucggggggccccUg.....                | 1                  | 1          | seq                 |                       |
| .....gagacUucgucggggggc.....                      | 1                  | 1          | seq                 |                       |
| .....gagacgucguUggggggc.....                      | 2                  | 1          | seq                 |                       |
| .....gUgacgucgucggggggc.....                      | 3                  | 1          | seq                 |                       |
| .....gagacgucgucggUgggc.....                      | 1                  | 1          | seq                 |                       |
| .....gagacgucgucggggggc.....                      | 2296               | 0          | seq                 |                       |
| .....gagacgucgucgggggAc.....                      | 6                  | 1          | seq                 |                       |
| .....gagacgucgucggggCgc.....                      | 2                  | 1          | seq                 |                       |
| .....gagacgucgucgCgggc.....                       | 2                  | 1          | seq                 |                       |
| .....gagacgucgucggggUgc.....                      | 2                  | 1          | seq                 |                       |
| .....Nagacgucgucggggggc.....                      | 2                  | 1          | seq                 |                       |
| .....gagGcgucgucggggggc.....                      | 5                  | 1          | seq                 |                       |
| .....gagacgucguAggggggc.....                      | 1                  | 1          | seq                 |                       |
| .....gagacgCcgucggggggc.....                      | 5                  | 1          | seq                 |                       |
| .....Cagacgucgucggggggc.....                      | 4                  | 1          | seq                 |                       |
| .....gagacgucgucgggAggc.....                      | 4                  | 1          | seq                 |                       |
| .....gagacgucgAcggggggc.....                      | 1                  | 1          | seq                 |                       |
| .....gagacgucgucgggggA.....                       | 58                 | 1          | seq                 |                       |
| .....gagacgucgCcggggggc.....                      | 3                  | 1          | seq                 |                       |
| .....gagacgucgucggCggc.....                       | 1                  | 1          | seq                 |                       |
| .....gagacgucgucgggggUc.....                      | 1                  | 1          | seq                 |                       |
| .....gagacgucgucggggggU.....                      | 393                | 1          | seq                 |                       |
| .....Uagacgucgucggggggc.....                      | 3                  | 1          | seq                 |                       |
| .....gGgacgucgucggggggc.....                      | 8                  | 1          | seq                 |                       |
| .....gagacgucgucgUggggc.....                      | 2                  | 1          | seq                 |                       |
| .....gagacgucgucggggggG.....                      | 15                 | 1          | seq                 |                       |
| .....gagacgucgucggggggcA.....                     | 401                | 1          | seq                 |                       |
| .....gagacgCcgucggggggcc.....                     | 17                 | 1          | seq                 |                       |
| .....gagacgucgucggggggUc.....                     | 10                 | 1          | seq                 |                       |

| Star                                                                  | Mature                        |                       |     |  |
|-----------------------------------------------------------------------|-------------------------------|-----------------------|-----|--|
| gaacaucaaaagggaauucagguuauuauuccaaaugggaacauggggaagacgagacgagaacguagg | aaauccagagagacgucgucggggggccc | ccgugaagaguuaucuuuuau |     |  |
| .....gagacgucgucgggUgcc.....                                          | 5                             | 1                     | seq |  |
| .....gagacgucgucgggCgcc.....                                          | 8                             | 1                     | seq |  |
| .....gCgacgucgucggggggcc.....                                         | 2                             | 1                     | seq |  |
| .....Uagacgucgucggggggcc.....                                         | 7                             | 1                     | seq |  |
| .....gagacgucgucggggggcc.....                                         | 4899                          | 0                     | seq |  |
| .....gagacgGcgcggggggcc.....                                          | 1                             | 1                     | seq |  |
| .....gagacgucgCcggggggcc.....                                         | 12                            | 1                     | seq |  |
| .....gagacgucgucggggggAc.....                                         | 4                             | 1                     | seq |  |
| .....gagacgucguAggggggcc.....                                         | 3                             | 1                     | seq |  |
| .....gagacgucgucggUggcc.....                                          | 2                             | 1                     | seq |  |
| .....gagUcgucgucggggggcc.....                                         | 1                             | 1                     | seq |  |
| .....gagacgucgucgCggggcc.....                                         | 1                             | 1                     | seq |  |
| .....gagaGgucgucggggggcc.....                                         | 1                             | 1                     | seq |  |
| .....gagacgucgucggggggGc.....                                         | 7                             | 1                     | seq |  |
| .....gaAacgucgucggggggcc.....                                         | 1                             | 1                     | seq |  |
| .....gagacgucgucggggggcG.....                                         | 82                            | 1                     | seq |  |
| .....gagacgucguGggggggcc.....                                         | 5                             | 1                     | seq |  |
| .....gagGcgcgucgucggggggcc.....                                       | 15                            | 1                     | seq |  |
| .....gagacgucgAcggggggcc.....                                         | 1                             | 1                     | seq |  |
| .....gagacgAcgucggggggcc.....                                         | 2                             | 1                     | seq |  |
| .....gagacgucgucCggggggcc.....                                        | 2                             | 1                     | seq |  |
| .....gagacgucgucUggggggcc.....                                        | 2                             | 1                     | seq |  |
| .....gGgacgucgucggggggcc.....                                         | 24                            | 1                     | seq |  |
| .....gagacgucgucggCggcc.....                                          | 7                             | 1                     | seq |  |
| .....gagacgucgucgUggggcc.....                                         | 3                             | 1                     | seq |  |
| .....gagacgucUucggggggcc.....                                         | 1                             | 1                     | seq |  |
| .....Nagacgucgucggggggcc.....                                         | 8                             | 1                     | seq |  |
| .....gagacgucgucgggggAc.....                                          | 8                             | 1                     | seq |  |
| .....gUgacgucgucggggggcc.....                                         | 1                             | 1                     | seq |  |
| .....gaUacgucgucggggggcc.....                                         | 1                             | 1                     | seq |  |
| .....gagacgucgucggAgggcc.....                                         | 7                             | 1                     | seq |  |
| .....gagacCucgucggggggcc.....                                         | 1                             | 1                     | seq |  |
| .....Cagacgucgucggggggcc.....                                         | 6                             | 1                     | seq |  |
| .....gagacgucgucgggggcU.....                                          | 1529                          | 1                     | seq |  |
| .....gagCcgucgucggggggcc.....                                         | 1                             | 1                     | seq |  |
| .....gagacgucguUggggggcc.....                                         | 2                             | 1                     | seq |  |
| .....gagacgucgucggggUcc.....                                          | 2                             | 1                     | seq |  |
| .....gagacgucgucgggggUcc.....                                         | 13                            | 1                     | seq |  |
| .....gagacgucgucggggggAc.....                                         | 2                             | 1                     | seq |  |
| .....Cagacgucgucggggggccc.....                                        | 1                             | 1                     | seq |  |
| .....gagacgucgucggggggcGc.....                                        | 4                             | 1                     | seq |  |
| .....gagacgucgucCggggggccc.....                                       | 1                             | 1                     | seq |  |
| .....gagUcgucgucggggggccc.....                                        | 3                             | 1                     | seq |  |
| .....gUgacgucgucggggggccc.....                                        | 5                             | 1                     | seq |  |
| .....gGgacgucgucggggggccc.....                                        | 12                            | 1                     | seq |  |
| .....gagGcgcgucgucggggggccc.....                                      | 22                            | 1                     | seq |  |
| .....gagacgucgCcggggggccc.....                                        | 7                             | 1                     | seq |  |
| .....gagacgucgucgggUgcc.....                                          | 3                             | 1                     | seq |  |
| .....gagacgucUucggggggccc.....                                        | 1                             | 1                     | seq |  |
| .....gagacgucgGcggggggccc.....                                        | 1                             | 1                     | seq |  |
| .....gagacgucgucggggggcA.....                                         | 477                           | 1                     | seq |  |
| .....gagacgucgucgggggGcc.....                                         | 17                            | 1                     | seq |  |
| .....Aagacgucgucggggggccc.....                                        | 9                             | 1                     | seq |  |
| .....gagacgucgucggggggcUc.....                                        | 17                            | 1                     | seq |  |
| .....gagacgucgucgggggAc.....                                          | 3                             | 1                     | seq |  |
| .....gaAacgucgucggggggccc.....                                        | 2                             | 1                     | seq |  |
| .....gagaGgucgucggggggccc.....                                        | 1                             | 1                     | seq |  |
| .....gagaAgucgucggggggccc.....                                        | 1                             | 1                     | seq |  |
| .....gagacgucgucggggggccc.....                                        | 4750                          | 0                     | seq |  |
| .....gagacgCcgucggggggccc.....                                        | 12                            | 1                     | seq |  |
| .....gagacgucgucUggggggccc.....                                       | 2                             | 1                     | seq |  |
| .....gagacgucguGggggggccc.....                                        | 2                             | 1                     | seq |  |
| .....gagacgucgucggggggcG.....                                         | 78                            | 1                     | seq |  |
| .....gagacgucgucggAgggccc.....                                        | 6                             | 1                     | seq |  |
| .....gagacgucgucggggUccc.....                                         | 2                             | 1                     | seq |  |
| .....gagacguAguCggggggccc.....                                        | 2                             | 1                     | seq |  |
| .....gagacgucgucgggggAc.....                                          | 3                             | 1                     | seq |  |
| .....Uagacgucgucggggggccc.....                                        | 6                             | 1                     | seq |  |
| .....Nagacgucgucggggggccc.....                                        | 9                             | 1                     | seq |  |
| .....gagacgucgucggCggccc.....                                         | 2                             | 1                     | seq |  |

## Star

## Mature

gaacaucaaaaagggaauucagguuauuauuccaaaugggaacaugggagagacgagagaacguuaggaaauccagagacgucgucggggggcccgugaagaguuaucuuuuau

|                                     |      |   |     |
|-------------------------------------|------|---|-----|
| .....gagacgucgucgggUggccc.....      | 7    | 1 | seq |
| .....gagacguGgucggggggccc.....      | 1    | 1 | seq |
| .....gagacgucgucgggCgccc.....       | 3    | 1 | seq |
| .....gagacgucgucgUggggccc.....      | 2    | 1 | seq |
| .....gagacgucguUggggggccc.....      | 8    | 1 | seq |
| .....gagacgucgAcggggggccc.....      | 1    | 1 | seq |
| .....gagacgucgucggggggcccG.....     | 154  | 1 | seq |
| .....gagacguCNucggggggccc.....      | 1    | 1 | seq |
| .....gagacgucgucggggggcccGc.....    | 1    | 1 | seq |
| .....gagacgucgucgCggggccc.....      | 1    | 1 | seq |
| .....gagGcguucgucggggggccc.....     | 3    | 1 | seq |
| .....gagacgucgucUggggggccc.....     | 1    | 1 | seq |
| .....Aagacgucgucggggggccc.....      | 1    | 1 | seq |
| .....gagacgucgucggggggcGcc.....     | 3    | 1 | seq |
| .....gagacgucgucggggggccc.....      | 527  | 0 | seq |
| .....gUgacgucgucggggggccc.....      | 2    | 1 | seq |
| .....gGgacgucgucggggggccc.....      | 2    | 1 | seq |
| .....gagacgucgucggggggGccc.....     | 4    | 1 | seq |
| .....gagacgucgCcgggggccc.....       | 3    | 1 | seq |
| .....gagacgucgucggggggcccA.....     | 179  | 1 | seq |
| .....Cagacgucgucggggggccc.....      | 1    | 1 | seq |
| .....gagacgucgucggggggcUcc.....     | 1    | 1 | seq |
| .....Uagacgucgucggggggccc.....      | 2    | 1 | seq |
| .....gagacgucgucggggggcccAg.....    | 22   | 1 | seq |
| .....gagacgucgucggggggcccC.....     | 1    | 1 | seq |
| .....gagacgucgucggggggcccGg.....    | 15   | 1 | seq |
| .....gagacgucgucggggggcccgc.....    | 16   | 0 | seq |
| .....gagacgucgucggggggcccA.....     | 10   | 1 | seq |
| .....gagacgucgucggggggcccU.....     | 11   | 1 | seq |
| .....gagacgucgucggggggcccgcA.....   | 2    | 1 | seq |
| .....gagacgucgucggggggcccUgu.....   | 9    | 1 | seq |
| .....gagacgucgucggggggcccUgug.....  | 1    | 1 | seq |
| .....gagacgucgucggggggcccUguga..... | 1    | 1 | seq |
| .....agacgucgucgggUgcc.....         | 6    | 1 | seq |
| .....agacgGcguucggggggcc.....       | 1    | 1 | seq |
| .....agacgucgucgggUcc.....          | 5    | 1 | seq |
| .....agacgucCucggggggcc.....        | 1    | 1 | seq |
| .....agacgucgAcggggggcc.....        | 4    | 1 | seq |
| .....agaGgucgucggggggcc.....        | 2    | 1 | seq |
| .....agacgucgGcggggggcc.....        | 4    | 1 | seq |
| .....agacgucgucggggggcc.....        | 7592 | 0 | seq |
| .....agacUucgucggggggcc.....        | 1    | 1 | seq |
| .....agacgucgucggggggAc.....        | 4    | 1 | seq |
| .....agCcgucgucggggggcc.....        | 1    | 1 | seq |
| .....agUcgucgucggggggcc.....        | 3    | 1 | seq |
| .....agacgucgucggggggcA.....        | 664  | 1 | seq |
| .....agacgucgucggUggcc.....         | 3    | 1 | seq |
| .....Ngacgucgucggggggcc.....        | 11   | 1 | seq |
| .....agacguAgucggggggcc.....        | 1    | 1 | seq |
| .....Ggacgucgucggggggcc.....        | 38   | 1 | seq |
| .....agacgucgucggCggcc.....         | 9    | 1 | seq |
| .....Cgacgucgucggggggcc.....        | 2    | 1 | seq |
| .....agacgucgucgggCgcc.....         | 4    | 1 | seq |
| .....agacgucgucggggggcU.....        | 2323 | 1 | seq |
| .....agacgucgucgCggggcc.....        | 1    | 1 | seq |
| .....agacgucgucUgggggccc.....       | 3    | 1 | seq |
| .....agGcguucgucggggggcc.....       | 28   | 1 | seq |
| .....agacgucUucggggggcc.....        | 1    | 1 | seq |
| .....agacgucguUggggggccc.....       | 1    | 1 | seq |
| .....Ugacgucgucggggggcc.....        | 6    | 1 | seq |
| .....agacgucgucggggggcG.....        | 119  | 1 | seq |
| .....agacgucgucgggggAcc.....        | 24   | 1 | seq |
| .....aAacgucgucggggggcc.....        | 4    | 1 | seq |
| .....agacgucgCcgggggggcc.....       | 22   | 1 | seq |
| .....agacgCcgucggggggcc.....        | 23   | 1 | seq |
| .....agacgucgucCggggggcc.....       | 2    | 1 | seq |
| .....agacgucgucggAgggcc.....        | 5    | 1 | seq |
| .....agacgucguUggggggccc.....       | 10   | 1 | seq |
| .....agacgAcgucggggggcc.....        | 7    | 1 | seq |
| .....agacgucgucggggggUc.....        | 24   | 1 | seq |

| Star                                                                                                                  |      | Mature |  |     |  |  |
|-----------------------------------------------------------------------------------------------------------------------|------|--------|--|-----|--|--|
| gaacaucaaaaagggaaucaaggguuaauuucccaaauggggaacauggggaagacgagagaacguuaggaaauccagagacgucgucggggggccccgugaagaguuaucuuuuau |      |        |  |     |  |  |
| .....aUacgucgucggggggccc.....                                                                                         | 4    | 1      |  | seq |  |  |
| .....aCacgucgucggggggccc.....                                                                                         | 1    | 1      |  | seq |  |  |
| .....agacgucgucggggggcccG.....                                                                                        | 108  | 1      |  | seq |  |  |
| .....Cgacgucgucggggggccc.....                                                                                         | 4    | 1      |  | seq |  |  |
| .....agacgucgucgggggUccc.....                                                                                         | 3    | 1      |  | seq |  |  |
| .....agacgucgAcggggggccc.....                                                                                         | 5    | 1      |  | seq |  |  |
| .....agCcgucgucggggggccc.....                                                                                         | 2    | 1      |  | seq |  |  |
| .....agacgucgucgCggggccc.....                                                                                         | 1    | 1      |  | seq |  |  |
| .....agacUucgucggggggccc.....                                                                                         | 1    | 1      |  | seq |  |  |
| .....agacgucgGcggggggccc.....                                                                                         | 4    | 1      |  | seq |  |  |
| .....agacgucgucggggggcUc.....                                                                                         | 28   | 1      |  | seq |  |  |
| .....agacgucgCcggggggccc.....                                                                                         | 16   | 1      |  | seq |  |  |
| .....agacgucgucggggggcccA.....                                                                                        | 661  | 1      |  | seq |  |  |
| .....agacgucgucggggCgccc.....                                                                                         | 1    | 1      |  | seq |  |  |
| .....agacgCcgucggggggccc.....                                                                                         | 13   | 1      |  | seq |  |  |
| .....agacgucgucggggggcAc.....                                                                                         | 8    | 1      |  | seq |  |  |
| .....agGcgucgucggggggccc.....                                                                                         | 25   | 1      |  | seq |  |  |
| .....aUacgucgucggggggccc.....                                                                                         | 1    | 1      |  | seq |  |  |
| .....agacgucguUggggggccc.....                                                                                         | 11   | 1      |  | seq |  |  |
| .....agacgucgucUggggggccc.....                                                                                        | 4    | 1      |  | seq |  |  |
| .....aAacgucgucggggggccc.....                                                                                         | 9    | 1      |  | seq |  |  |
| .....agacCucgucggggggccc.....                                                                                         | 1    | 1      |  | seq |  |  |
| .....agacgucgucgggAgggccc.....                                                                                        | 11   | 1      |  | seq |  |  |
| .....agacguAgucggggggccc.....                                                                                         | 2    | 1      |  | seq |  |  |
| .....agacgAcgucggggggccc.....                                                                                         | 4    | 1      |  | seq |  |  |
| .....agacgucgucggggggUcc.....                                                                                         | 4    | 1      |  | seq |  |  |
| .....agacgucgucgggggAccc.....                                                                                         | 10   | 1      |  | seq |  |  |
| .....Ngacgucgucggggggccc.....                                                                                         | 5    | 1      |  | seq |  |  |
| .....agacgucgucggggUgccc.....                                                                                         | 4    | 1      |  | seq |  |  |
| .....agacgucgucggUggccc.....                                                                                          | 5    | 1      |  | seq |  |  |
| .....agacgucgucggggggccc.....                                                                                         | 6609 | 0      |  | seq |  |  |
| .....agacgucgucggggggAcc.....                                                                                         | 9    | 1      |  | seq |  |  |
| .....Ggacgucgucggggggccc.....                                                                                         | 35   | 1      |  | seq |  |  |
| .....agacgucgucggggggcGc.....                                                                                         | 3    | 1      |  | seq |  |  |
| .....agacgucgucggCggccc.....                                                                                          | 6    | 1      |  | seq |  |  |
| .....agacgucUucggggggccc.....                                                                                         | 2    | 1      |  | seq |  |  |
| .....Ugacgucgucggggggccc.....                                                                                         | 7    | 1      |  | seq |  |  |
| .....agUcgucgucggggggccc.....                                                                                         | 2    | 1      |  | seq |  |  |
| .....Cgacgucgucggggggcccc.....                                                                                        | 1    | 1      |  | seq |  |  |
| .....agacgucgucggggggcAcc.....                                                                                        | 4    | 1      |  | seq |  |  |
| .....agacgucgCcggggggcccc.....                                                                                        | 2    | 1      |  | seq |  |  |
| .....Ggacgucgucggggggcccc.....                                                                                        | 5    | 1      |  | seq |  |  |
| .....agacgucgucggggggcccG.....                                                                                        | 253  | 1      |  | seq |  |  |
| .....agacgucgucggggggAccc.....                                                                                        | 1    | 1      |  | seq |  |  |
| .....agacgucgucggggggcUcc.....                                                                                        | 1    | 1      |  | seq |  |  |
| .....agacgucgucgggggAcccc.....                                                                                        | 1    | 1      |  | seq |  |  |
| .....agacgucguUggggggcccc.....                                                                                        | 1    | 1      |  | seq |  |  |
| .....Ugacgucgucggggggcccc.....                                                                                        | 1    | 1      |  | seq |  |  |
| .....agacgucgucggggggcccA.....                                                                                        | 296  | 1      |  | seq |  |  |
| .....agGcgucgucggggggcccc.....                                                                                        | 8    | 1      |  | seq |  |  |
| .....agacgucgucggggggcGcc.....                                                                                        | 8    | 1      |  | seq |  |  |
| .....agacgucgucggggggccAc.....                                                                                        | 1    | 1      |  | seq |  |  |
| .....agUcgucgucggggggcccc.....                                                                                        | 1    | 1      |  | seq |  |  |
| .....agacgCcgucggggggcccc.....                                                                                        | 1    | 1      |  | seq |  |  |
| .....agacgucgucggggUgccc.....                                                                                         | 1    | 1      |  | seq |  |  |
| .....agacgucgucggggggcccc.....                                                                                        | 877  | 0      |  | seq |  |  |
| .....agacgucgucggggggccccU.....                                                                                       | 4    | 1      |  | seq |  |  |
| .....agacgucgucggggggccccA.....                                                                                       | 10   | 1      |  | seq |  |  |
| .....agacgucgucggggggcccccg.....                                                                                      | 21   | 0      |  | seq |  |  |
| .....agacgucgucggggAgcccccg.....                                                                                      | 1    | 1      |  | seq |  |  |
| .....agacgucgucggggggccccGg.....                                                                                      | 16   | 1      |  | seq |  |  |
| .....agacgucgucggggggccccAg.....                                                                                      | 22   | 1      |  | seq |  |  |
| .....agacgucgucggggggAcccg.....                                                                                       | 1    | 1      |  | seq |  |  |
| .....agacgucgucggggggccccUgu.....                                                                                     | 7    | 1      |  | seq |  |  |
| .....agacgucgucggggggcccccgA.....                                                                                     | 1    | 1      |  | seq |  |  |
| .....agacgucgucggggggccccUgug.....                                                                                    | 2    | 1      |  | seq |  |  |
| .....agacgucgucggggggccccAgug.....                                                                                    | 1    | 1      |  | seq |  |  |
| .....agacgucgucggggggccccUgugaa.....                                                                                  | 1    | 1      |  | seq |  |  |
| .....agacgucgucggggggccccUgugaaga.....                                                                                | 2    | 1      |  | seq |  |  |
| .....agacgucgucggggggccccUgugaagaguu.....                                                                             | 1    | 1      |  | seq |  |  |

Star

Mature

gaacaucaaaagggaaucaaggguuaauuucccaaauggggaacauggggagacgacgagaaacguuaggaaauccagagacgucgucggggggcccgugaagaguuaucuuuuau

|                                   |      |   |     |
|-----------------------------------|------|---|-----|
| .....gacgucgucggggggccc.....      | 2183 | 0 | seq |
| .....gacgucgucggggUgccc.....      | 1    | 1 | seq |
| .....gacgucgucggggAccc.....       | 1    | 1 | seq |
| .....gacgucgucgUggggccc.....      | 1    | 1 | seq |
| .....gacguAguccggggggccc.....     | 2    | 1 | seq |
| .....gacgucgucgggggUcc.....       | 3    | 1 | seq |
| .....gacgucguAggggggccc.....      | 1    | 1 | seq |
| .....gacgucguUggggggccc.....      | 2    | 1 | seq |
| .....gacgGcguccggggggccc.....     | 3    | 1 | seq |
| .....gacgucgucggggggcccA.....     | 227  | 1 | seq |
| .....gacgucgCcggggggccc.....      | 10   | 1 | seq |
| .....gacgucgucggggggcUc.....      | 11   | 1 | seq |
| .....gGcguccgucggggggccc.....     | 8    | 1 | seq |
| .....gacguGgucggggggccc.....      | 1    | 1 | seq |
| .....gCcguccgucggggggccc.....     | 1    | 1 | seq |
| .....gacgucgucCggggggccc.....     | 1    | 1 | seq |
| .....gacgucgucggggggcccG.....     | 28   | 1 | seq |
| .....gacgucgucggggggcAc.....      | 4    | 1 | seq |
| .....gacgucgucCggggccc.....       | 1    | 1 | seq |
| .....gUcguccgucggggggccc.....     | 1    | 1 | seq |
| .....gacgCcguccggggggccc.....     | 7    | 1 | seq |
| .....Aacgucgucggggggccc.....      | 20   | 1 | seq |
| .....gacgucgAcggggggccc.....      | 1    | 1 | seq |
| .....gacgucgucggUggccc.....       | 1    | 1 | seq |
| .....Nacgucgucggggggccc.....      | 7    | 1 | seq |
| .....gacCuccgucggggggccc.....     | 2    | 1 | seq |
| .....gacgucgucggggggcGc.....      | 2    | 1 | seq |
| .....gacgucguGggggggccc.....      | 2    | 1 | seq |
| .....gacgucgucggggUccc.....       | 1    | 1 | seq |
| .....Uacgucgucggggggccc.....      | 2    | 1 | seq |
| .....gacgucgucUggggggccc.....     | 1    | 1 | seq |
| .....gacgucgCcggggggccc.....      | 2    | 1 | seq |
| .....gacgucgucggggggccc.....      | 247  | 0 | seq |
| .....gacgucgucggggggcAcc.....     | 1    | 1 | seq |
| .....gacgucgucggggggcccA.....     | 71   | 1 | seq |
| .....gacgCcguccggggggccc.....     | 2    | 1 | seq |
| .....gacgucgucggggggcGcc.....     | 1    | 1 | seq |
| .....gacgucgucggUggccc.....       | 1    | 1 | seq |
| .....gacgucgucggggggcccG.....     | 70   | 1 | seq |
| .....Aacgucgucggggggccc.....      | 2    | 1 | seq |
| .....gacgucgucggggggcccA.....     | 1    | 1 | seq |
| .....gacgucgucggggggcccU.....     | 3    | 1 | seq |
| .....gGcguccgucggggggcccG.....    | 1    | 1 | seq |
| .....gacgucgucggggggcccAeg.....   | 1    | 1 | seq |
| .....gacgucgucggggggcccAg.....    | 2    | 1 | seq |
| .....gacgucgucggggggcccG.....     | 12   | 0 | seq |
| .....gacgucgucggggggcccGg.....    | 5    | 1 | seq |
| .....gacgucgucggggggcccUgu.....   | 4    | 1 | seq |
| .....gacgucgucggggggcccUgug.....  | 1    | 1 | seq |
| .....gacgucgucggggggcccUguga..... | 1    | 1 | seq |
| .....acgucgucgUggggccc.....       | 1    | 1 | seq |
| .....acgucgucggggAcccc.....       | 1    | 1 | seq |
| .....Ccguccgucggggggccc.....      | 1    | 1 | seq |
| .....Gcguccgucggggggccc.....      | 4    | 1 | seq |
| .....acgucgucggggggcccGc.....     | 2    | 1 | seq |
| .....acgucgucggggggcccA.....      | 117  | 1 | seq |
| .....acgucgucgggCgcccc.....       | 1    | 1 | seq |
| .....acgucgucggggggcGcc.....      | 3    | 1 | seq |
| .....acgucgucggggggcUcc.....      | 1    | 1 | seq |
| .....acgucgucggggggccc.....       | 323  | 0 | seq |
| .....acgucgucggggggcccG.....      | 101  | 1 | seq |
| .....acgucgucgggUgcccc.....       | 1    | 1 | seq |
| .....acgucgucggggUcccc.....       | 1    | 1 | seq |
| .....acgucgucggggggcccGg.....     | 15   | 1 | seq |
| .....acgucgucggggggcccU.....      | 7    | 1 | seq |
| .....acgucgucggggggcccA.....      | 4    | 1 | seq |
| .....acgucgucggggggcccAg.....     | 16   | 1 | seq |
| .....acgucgucggggggcccG.....      | 32   | 0 | seq |
| .....acgucgucggggggcccC.....      | 2    | 1 | seq |
| .....acgucgucggggggcccUgu.....    | 12   | 1 | seq |

## Star

## Mature

|                                                                                                                       |     |   |     |
|-----------------------------------------------------------------------------------------------------------------------|-----|---|-----|
| gaacaucaaaagggaaucaaggguaaauuucccaaauggggaacauggggaagacgacgagaaacguuaggaaauccagagacgucgucggggggcccgugaagaguuaucuuuuau |     |   |     |
| .....acgucgucggggggcccggu.....                                                                                        | 1   | 1 | seq |
| .....acgucgucggggggcccgC.....                                                                                         | 1   | 1 | seq |
| .....acgucgucggggggcccgug.....                                                                                        | 1   | 0 | seq |
| .....acgucgucggggggcccgUgug.....                                                                                      | 1   | 1 | seq |
| .....acgucgucggggggcccgUgugaag.....                                                                                   | 1   | 1 | seq |
| .....cgucgucggggggcccgAccg.....                                                                                       | 1   | 1 | seq |
| .....cgucgucggggggcccgGcg.....                                                                                        | 3   | 1 | seq |
| .....cgCcgucggggggcccg.....                                                                                           | 2   | 1 | seq |
| .....cgucgucggggggcccgAgcccg.....                                                                                     | 2   | 1 | seq |
| .....cgucgucggggggcccgGg.....                                                                                         | 184 | 1 | seq |
| .....cgucgucggggggcccgA.....                                                                                          | 72  | 1 | seq |
| .....cgucgucggggggcccgCC.....                                                                                         | 26  | 1 | seq |
| .....cgucgucggggggcccgAcg.....                                                                                        | 5   | 1 | seq |
| .....cgucgucggggggcccgAg.....                                                                                         | 200 | 1 | seq |
| .....cgucgucggggggcccgU.....                                                                                          | 59  | 1 | seq |
| .....cgucgucggggggcccg.....                                                                                           | 276 | 0 | seq |
| .....cgucgucggggggcccgUccg.....                                                                                       | 2   | 1 | seq |
| .....cgucgucggggggcccgccgu.....                                                                                       | 2   | 0 | seq |
| .....cgucgucggggggcccgccCu.....                                                                                       | 4   | 1 | seq |
| .....cgucgucggggggcccgUgu.....                                                                                        | 135 | 1 | seq |
| .....cgucgucggggggcccgGgu.....                                                                                        | 9   | 1 | seq |
| .....cgucgucggggggcccgAgu.....                                                                                        | 1   | 1 | seq |
| .....cgucgucggggggcccgC.....                                                                                          | 3   | 1 | seq |
| .....cgucgucggggggcccgUgug.....                                                                                       | 33  | 1 | seq |
| .....cgucgucggggggcccgccgu.....                                                                                       | 2   | 0 | seq |
| .....cgucgucggggggcccgCg.....                                                                                         | 1   | 1 | seq |
| .....cgucgucggggggcccgGgug.....                                                                                       | 6   | 1 | seq |
| .....cgucgucggggggcccgAgug.....                                                                                       | 1   | 1 | seq |
| .....cgucgucggggggcccgUguga.....                                                                                      | 6   | 1 | seq |
| .....cgucgucggggggcccgGgugaa.....                                                                                     | 1   | 1 | seq |
| .....cgucgucggggggcccgUgugaa.....                                                                                     | 2   | 1 | seq |
| .....cgucgucggggggcccgUgugaag.....                                                                                    | 4   | 1 | seq |
| .....cgucgucggggggcccgUgugaagag.....                                                                                  | 2   | 1 | seq |
| .....gucgucggggggcccgUgu.....                                                                                         | 4   | 1 | seq |
| .....gucgucggggggcccgUgug.....                                                                                        | 1   | 1 | seq |
| .....ucgucggggggcccgUguga.....                                                                                        | 1   | 1 | seq |
| .....ucgucggggggcccgUgugaagagu.....                                                                                   | 1   | 1 | seq |
| .....cgggggcccgUgugaagagu.....                                                                                        | 1   | 1 | seq |
| .....cgggggcccgUgugaagaguuauc.....                                                                                    | 1   | 1 | seq |
| .....ggggggcccgUgugaagagu.....                                                                                        | 1   | 1 | seq |





## Star

## Mature

|                                                                                                                    |    |   |     |
|--------------------------------------------------------------------------------------------------------------------|----|---|-----|
| aggucucggagagcaggggaaaaacaggcgaguaacucaugaucuccaugugauuuuugaacuguuacaguuuuuccccacuccaccgagaccuauaggccuucacuaacacau |    |   |     |
| .....uuuuuccacuccaccgagaccA.....                                                                                   | 1  | 1 | seq |
| .....uuuuuccacuccaccgagaccu.....                                                                                   | 2  | 0 | seq |
| .....uuuuuccacuccaccgagaccuUu.....                                                                                 | 1  | 1 | seq |
| .....uuuuuccacuccaccgagaccuCu.....                                                                                 | 1  | 1 | seq |
| .....uuuuuccacuccaccgag.....                                                                                       | 1  | 0 | seq |
| .....uuuUcccacuccaccgagacc.....                                                                                    | 2  | 1 | seq |
| .....uuuuuccacuccaccgagacc.....                                                                                    | 15 | 0 | seq |
| .....uuuuuccacuccaccgagacU.....                                                                                    | 4  | 1 | seq |
| .....uuuuuccacuccaccgagaccua.....                                                                                  | 2  | 0 | seq |
| .....uuccccacuccaccgag.....                                                                                        | 2  | 0 | seq |
| .....uucccAacuccaccgag.....                                                                                        | 4  | 1 | seq |
| .....uucccAacuccaccgaga.....                                                                                       | 1  | 1 | seq |
| .....uuccccacuccaccgaga.....                                                                                       | 2  | 0 | seq |
| .....uucccAacuccaccgagac.....                                                                                      | 3  | 1 | seq |
| .....uuccccacuccaccgagac.....                                                                                      | 3  | 0 | seq |
| .....uuccccacuccaccgagacU.....                                                                                     | 3  | 1 | seq |
| .....uucccAacuccaccgagacc.....                                                                                     | 11 | 1 | seq |
| .....uuccccaUuccaccgagacc.....                                                                                     | 1  | 1 | seq |
| .....uuuccacuccaccgagacc.....                                                                                      | 6  | 0 | seq |
| .....uuuccacuccaccgagaccA.....                                                                                     | 1  | 1 | seq |
| .....uuuccacuccaccgagaccu.....                                                                                     | 9  | 0 | seq |
| .....uuuccacuccaccgagaccC.....                                                                                     | 1  | 1 | seq |
| .....uuuccAacuccaccgagaccu.....                                                                                    | 5  | 1 | seq |
| .....uuuccacuccaccgagaccG.....                                                                                     | 1  | 1 | seq |
| .....uuuccacuccaccgagaccCa.....                                                                                    | 1  | 1 | seq |
| .....uuuccacuccaccgagaccua.....                                                                                    | 61 | 0 | seq |
| .....Auuccacuccaccgagaccua.....                                                                                    | 1  | 1 | seq |
| .....uuuccacuccaccgagaccGa.....                                                                                    | 1  | 1 | seq |
| .....uuuccacuccaccgagaccuG.....                                                                                    | 2  | 1 | seq |
| .....uuuccacuccaccgagaccuauC.....                                                                                  | 1  | 1 | seq |
| .....uuuccacuccaccgagaccuauU.....                                                                                  | 1  | 1 | seq |
| .....uuccccacuccaccgaga.....                                                                                       | 1  | 0 | seq |
| .....uuccccacuccaccgagacU.....                                                                                     | 1  | 1 | seq |
| .....uuccccacuccGccgagacc.....                                                                                     | 1  | 1 | seq |
| .....uuccccacuccaccgagacc.....                                                                                     | 1  | 0 | seq |
| .....uuccccacuccaccgagaccua.....                                                                                   | 4  | 0 | seq |
| .....uuccccacuccaccgagaccCa.....                                                                                   | 1  | 1 | seq |
| .....uuccccacuccaccgagaccuau.....                                                                                  | 4  | 0 | seq |
| .....ccccacuccaccgagacc.....                                                                                       | 2  | 0 | seq |
| .....cccAacuccaccgagacc.....                                                                                       | 2  | 1 | seq |
| .....ccccacuccaccgagaccuau.....                                                                                    | 1  | 0 | seq |
| .....cccacuccaccgagaccuauaggc.....                                                                                 | 1  | 0 | seq |
| .....cacuccaccgagGccuauaggccuucacuaacau.....                                                                       | 1  | 1 | seq |
| .....cacuccaccgagaccuauaggccuucacuaacaC.....                                                                       | 1  | 1 | seq |
| .....agaccuauaggccuucacuaacac.....                                                                                 | 1  | 0 | seq |
| .....agaccuauaggccuucacuaacau.....                                                                                 | 1  | 0 | seq |
| .....uauaggccuucacuaacacau.....                                                                                    | 1  | 0 | seq |

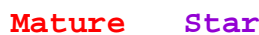

# Mature Star

|                                                                         |                                                    |      |   |     |
|-------------------------------------------------------------------------|----------------------------------------------------|------|---|-----|
| cagagugguuauucaggcaugacaaaaaacucgccuggaguuuaguugcgcagguuuuuacgggcaucaag | guggacgugccggaguguuuauucgggcaugacuagaaa            |      |   |     |
| .....                                                                   | guggacgugccggaguguuuauucgggcaugacuagaaa            | 4    | 1 | seq |
| .....                                                                   | gCggacgugccggaguguuuauucgggcaugacuagaaa            | 6    | 1 | seq |
| .....                                                                   | guggacgugccggaguguuuauucgggcaugacuagaaa            | 1    | 1 | seq |
| .....                                                                   | guggacgugccggaguguuuauucgggcaugacuagaaa            | 895  | 1 | seq |
| .....                                                                   | guggacgugccAgaguguuuauucgggcaugacuagaaa            | 19   | 1 | seq |
| .....                                                                   | guggacgugccAgaguguuuauucgggcaugacuagaaa            | 5    | 1 | seq |
| .....                                                                   | gugAacgugccggaguguuuauucgggcaugacuagaaa            | 1    | 1 | seq |
| .....                                                                   | guggacgugccggaguguuuauucgggcaugacuagaaa            | 7    | 1 | seq |
| .....                                                                   | guggacgugUcggaguguuuauucgggcaugacuagaaa            | 3    | 1 | seq |
| .....                                                                   | Uuggacgugccggaguguuuauucgggcaugacuagaaa            | 9    | 1 | seq |
| .....                                                                   | guggacgugccggUguguuuauucgggcaugacuagaaa            | 2    | 1 | seq |
| .....                                                                   | guAacgugccggaguguuuauucgggcaugacuagaaa             | 3    | 1 | seq |
| .....                                                                   | guggacgugccAggaguguuuauucgggcaugacuagaaa           | 1    | 1 | seq |
| .....                                                                   | guggacgugccgAaguguuuauucgggcaugacuagaaa            | 2    | 1 | seq |
| .....                                                                   | gAagacgugccggaguguuuauucgggcaugacuagaaa            | 1    | 1 | seq |
| .....                                                                   | guggacgugccUgaguguuuauucgggcaugacuagaaa            | 1    | 1 | seq |
| .....                                                                   | guggacgugccggagGguuuuauucgggcaugacuagaaa           | 10   | 1 | seq |
| .....                                                                   | Cuggacgugccggaguguuuauucgggcaugacuagaaa            | 1    | 1 | seq |
| .....                                                                   | guggacgugccggaguguuuauucgggcaugacuagaaa            | 2171 | 0 | seq |
| .....                                                                   | guggacgugUccggaguguuuauucgggcaugacuagaaa           | 1    | 1 | seq |
| .....                                                                   | guggacgugUggaguguuuauucgggcaugacuagaaa             | 4    | 1 | seq |
| .....                                                                   | guggGcugccggaguguuuauucgggcaugacuagaaa             | 8    | 1 | seq |
| .....                                                                   | gugCacgugccggaguguuuauucgggcaugacuagaaa            | 1    | 1 | seq |
| .....                                                                   | guggacgugccggagCguuuuauucgggcaugacuagaaa           | 7    | 1 | seq |
| .....                                                                   | guggacgugccggAUguuuuauucgggcaugacuagaaa            | 2    | 1 | seq |
| .....                                                                   | guggacgugccggagugCuuuuauucgggcaugacuagaaa          | 1    | 1 | seq |
| .....                                                                   | guggacgugGcggaguguuuauucgggcaugacuagaaa            | 1    | 1 | seq |
| .....                                                                   | guggacgugccggCguuuuauucgggcaugacuagaaa             | 1    | 1 | seq |
| .....                                                                   | guggacAuggcggaguguuuauucgggcaugacuagaaa            | 3    | 1 | seq |
| .....                                                                   | guggacgugccAgaguguuuauucgggcaugacuagaaa            | 1    | 1 | seq |
| .....                                                                   | guggacgugccggagugCuuuuauucgggcaugacuagaaa          | 24   | 1 | seq |
| .....                                                                   | guggacgugccggagGguuuuauucgggcaugacuagaaa           | 4    | 1 | seq |
| .....                                                                   | guggacgugccggaguuuuuauucgggcaugacuagaaa            | 1    | 1 | seq |
| .....                                                                   | guggacgugccggagugAuuuuauucgggcaugacuagaaa          | 31   | 1 | seq |
| .....                                                                   | guggacgugccggagugUGuuuauucgggcaugacuagaaa          | 9    | 1 | seq |
| .....                                                                   | guggacgugccggaguguuuuuauucgggcaugacuagaaa          | 7    | 0 | seq |
| .....                                                                   | guggacgugccggaguguCuuuuauucgggcaugacuagaaa         | 1    | 1 | seq |
| .....                                                                   | guggacgugccggagugAuuuuauucgggcaugacuagaaa          | 37   | 1 | seq |
| .....                                                                   | guggacgugccggagugCuuuuauucgggcaugacuagaaa          | 7    | 1 | seq |
| .....                                                                   | guggacgugccggagugGuuuuauucgggcaugacuagaaa          | 3    | 1 | seq |
| .....                                                                   | guggacgugccggaguguuuuuauucgggcaugacuagaaa          | 4    | 0 | seq |
| .....                                                                   | guggacgugccggaguguuuAuuuauucgggcaugacuagaaa        | 2    | 1 | seq |
| .....                                                                   | guggacgugccggagugAuuaauucgggcaugacuagaaa           | 4    | 1 | seq |
| .....                                                                   | guggacgugccggaguguuuuuauucgggcaugacuagaaa          | 2    | 0 | seq |
| .....                                                                   | guggacgugccggaguguuuGuaauucgggcaugacuagaaa         | 2    | 1 | seq |
| .....                                                                   | guggacgugccggagugCuuaauucgggcaugacuagaaa           | 2    | 1 | seq |
| .....                                                                   | guggacgugccggaguguuuUCuuuauucgggcaugacuagaaa       | 1    | 1 | seq |
| .....                                                                   | guggacgugccggagugAuuaauucgggcaugacuagaaa           | 8    | 1 | seq |
| .....                                                                   | guggacgugccggagugCuuaauucgggcaugacuagaaa           | 1    | 1 | seq |
| .....                                                                   | guggacgugccggaguguuuuuauucgggcaugacuagaaa          | 1    | 0 | seq |
| .....                                                                   | guggacgugccggaguguuuuuUuuuauucgggcaugacuagaaa      | 1    | 1 | seq |
| .....                                                                   | guggacgugccggagugAuuaaucuuuauucgggcaugacuagaaa     | 10   | 1 | seq |
| .....                                                                   | guggacgugccggaguguuuuuauucuuuauucgggcaugacuagaaa   | 1    | 0 | seq |
| .....                                                                   | guggacgugccggagugAuuaucgguuuuauucgggcaugacuagaaa   | 2    | 1 | seq |
| .....                                                                   | guggacgugccggagugAuuaucggguuuuauucgggcaugacuagaaa  | 3    | 1 | seq |
| .....                                                                   | guggacgugccggagugAuuaucgggcauuuauucgggcaugacuagaaa | 1    | 1 | seq |
| .....                                                                   | guggacgugccggagugAuuaucgggcaugaauucgggcaugacuagaaa | 1    | 1 | seq |
| .....                                                                   | uggacgugccggGguguuuauucgggcaugacuagaaa             | 2    | 1 | seq |
| .....                                                                   | uggacgCgccggaguguuuauucgggcaugacuagaaa             | 1    | 1 | seq |
| .....                                                                   | uggacguAaccggaguguuuauucgggcaugacuagaaa            | 2    | 1 | seq |
| .....                                                                   | uggacgugccAgaguguuuauucgggcaugacuagaaa             | 2    | 1 | seq |
| .....                                                                   | Gggacgugccggaguguuuauucgggcaugacuagaaa             | 1    | 1 | seq |
| .....                                                                   | uggacgugccggagCguuuuauucgggcaugacuagaaa            | 2    | 1 | seq |
| .....                                                                   | uggacgugccggagugCuuuuuauucgggcaugacuagaaa          | 142  | 1 | seq |
| .....                                                                   | uggacgugccggagGguuuuauucgggcaugacuagaaa            | 2    | 1 | seq |
| .....                                                                   | uggacgugccggagugAuuuuuauucgggcaugacuagaaa          | 925  | 1 | seq |
| .....                                                                   | uggacgugUcggaguguuuauucgggcaugacuagaaa             | 1    | 1 | seq |
| .....                                                                   | uggacgugccggaguguuuuuauucgggcaugacuagaaa           | 272  | 0 | seq |
| .....                                                                   | Cggacgugccggaguguuuauucgggcaugacuagaaa             | 3    | 1 | seq |
| .....                                                                   | uggacgugccggagGguuuuauucgggcaugacuagaaa            | 1    | 1 | seq |

# Mature Star

|                                                                           |                                         |   |   |     |
|---------------------------------------------------------------------------|-----------------------------------------|---|---|-----|
| cagagugguuauccaggcaugacaaaaaacuccgccuggaguuuaguugcgcaggguuuuaacgggcaucaag | guggacgugccggaguguuuauccgggcaugacuagaaa |   |   |     |
| .....                                                                     | ..uggacgugccggagugCu.....               | 3 | 1 | seq |
| .....                                                                     | ..uggacgugccggagugAu.....               | 4 | 1 | seq |
| .....                                                                     | ..uggacgugccggagugC.....                | 1 | 1 | seq |
| .....                                                                     | ..uggacgugccggagugCuu.....              | 1 | 1 | seq |
| .....                                                                     | ..uggacgugccggagugAuu.....              | 5 | 1 | seq |
| .....                                                                     | ..uggacgugccggagugAuua.....             | 1 | 1 | seq |
| .....                                                                     | ..uggacgugccggagugGua.....              | 1 | 1 | seq |
| .....                                                                     | ..uggacgugccggaguguuuauuc.....          | 1 | 0 | seq |
| .....                                                                     | ..uggacgugccggagugAuuaucgg.....         | 1 | 1 | seq |
| .....                                                                     | ..ggacgugccggaguguuuu.....              | 1 | 1 | seq |
| .....                                                                     | ..ggacgugccggaguguuua.....              | 1 | 0 | seq |
| .....                                                                     | ..gacgugccggagugGua.....                | 1 | 1 | seq |
| .....                                                                     | ..cgugccggagugAuuaucg.....              | 1 | 1 | seq |
| .....                                                                     | ..uuauccgggcaugacuag.....               | 4 | 0 | seq |
| .....                                                                     | ..uuauccgggcaugacuUg.....               | 1 | 1 | seq |
| .....                                                                     | ..uuauccgggcaugacuGg.....               | 3 | 1 | seq |
| .....                                                                     | ..uuauccgggcaugacuGga.....              | 1 | 1 | seq |
| .....                                                                     | ..uuauccgggcaugacuaga.....              | 3 | 0 | seq |
| .....                                                                     | ..uauccgggcaugacuGga.....               | 1 | 1 | seq |
| .....                                                                     | ..ucgggcaugacuagaaa.....                | 1 | 0 | seq |

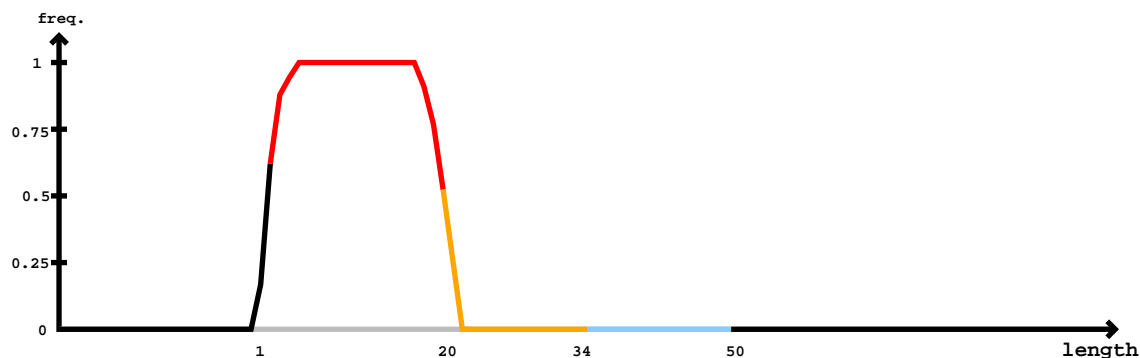

Star

| 5'-                                                                                                            | -3'   | exp |        |
|----------------------------------------------------------------------------------------------------------------|-------|-----|--------|
| gcucacugguuaaauacagaggaucuuuagaaauucgcaaaucaaaaauuuugcaaggcgaagggucaaacucugugaagugagaaaucacagaggugaucguaaccggu | reads | mm  | sample |
| (.((((((.....((((((((((((((((((.....(((.((((((.....)))))))))).))))))))..))))))))).((((.....))))..)))))).)..... | 1     | 1   | seq    |
| .....aCgaucuuuagaaauu.....                                                                                     | 757   | 1   | seq    |
| .....Cgaucuuuagaaauuuc.....                                                                                    | 2     | 1   | seq    |
| .....Ngaucuuuagaaauuuc.....                                                                                    | 1     | 1   | seq    |
| .....ggaucuuuagaaauuuc.....                                                                                    | 4     | 0   | seq    |
| .....ggaucuuuagaaauuucg.....                                                                                   | 1     | 1   | seq    |
| .....ggaucuuuagaaauuucg.....                                                                                   | 1     | 1   | seq    |
| .....Cgaucuuuagaaauuucg.....                                                                                   | 626   | 1   | seq    |
| .....Cgaucuuuagaaauuucg.....                                                                                   | 18    | 1   | seq    |
| .....ggaucuuuagaaauuucgG.....                                                                                  | 10    | 1   | seq    |
| .....ggaucuuuagaaauuucgGa.....                                                                                 | 5     | 1   | seq    |
| .....Cgaucuuuagaaauuucgca.....                                                                                 | 5     | 1   | seq    |
| .....ggaucuuuagaaauuucgGaa.....                                                                                | 3     | 1   | seq    |
| .....gaucuuuagaaauuucg.....                                                                                    | 1     | 1   | seq    |
| .....gaucuuuagaaauuucg.....                                                                                    | 2     | 1   | seq    |
| .....gaucuuuagaaauuucg.....                                                                                    | 1     | 1   | seq    |
| .....gaucuuuagaaauuucg.....                                                                                    | 3     | 1   | seq    |
| .....Uaucuuuagaaauuucg.....                                                                                    | 1     | 1   | seq    |
| .....gauUcuuagaaauuucg.....                                                                                    | 2     | 1   | seq    |
| .....gaucuuuagaaauuUg.....                                                                                     | 1     | 1   | seq    |
| .....gaucuuuagaaauuAcg.....                                                                                    | 1     | 1   | seq    |
| .....gaucuuuagaaauuUuuucg.....                                                                                 | 1     | 1   | seq    |
| .....gaucuuuagaaauuucg.....                                                                                    | 1     | 1   | seq    |
| .....gUuccuuuagaaauuucg.....                                                                                   | 4     | 1   | seq    |
| .....gaucuuuGgaauuucg.....                                                                                     | 2     | 1   | seq    |
| .....gaucuuCagaauuucg.....                                                                                     | 2     | 1   | seq    |
| .....gaucuuuagaaauuA.....                                                                                      | 43    | 1   | seq    |
| .....gaCccuuuagaaauuucg.....                                                                                   | 1     | 1   | seq    |
| .....gaucuuCuagaauuucg.....                                                                                    | 1     | 1   | seq    |
| .....gaucuuuagaaauuucC.....                                                                                    | 2     | 1   | seq    |
| .....gaucuuuagaaauuucg.....                                                                                    | 1     | 1   | seq    |
| .....gaucuuuagaaauuucg.....                                                                                    | 1     | 1   | seq    |
| .....gaucuuuagaaauuucg.....                                                                                    | 2     | 1   | seq    |
| .....gaucuuuagaaauuucg.....                                                                                    | 520   | 0   | seq    |

## Mature

## Star

|                                                                                                             |                                                  |   |     |  |
|-------------------------------------------------------------------------------------------------------------|--------------------------------------------------|---|-----|--|
| gcucacuggguuaaucacgagga <u>uuccuuuagaa<u>uu</u>ucgca<u>aa</u>u<u>caaaa</u>uuuug<u>caaggcgagggguca</u>aa</u> | acucgugaagugagaaauca <u>c</u> gaggugaucguaaccguu |   |     |  |
| .....g <u>auccuuuagaa<u>uu</u>ucgc</u> .....                                                                | 7                                                | 0 | seq |  |
| .....g <u>auccuuuagaa<u>uu</u>ucG</u> .....                                                                 | 1073                                             | 1 | seq |  |
| .....g <u>auccuuuagaa<u>Gu</u>ucgc</u> .....                                                                | 1                                                | 1 | seq |  |
| .....g <u>auccuuuagaa<u>Cuu</u>ucgc</u> .....                                                               | 20                                               | 1 | seq |  |
| .....g <u>auccuuuagaa<u>uu</u>ucGU</u> .....                                                                | 7                                                | 1 | seq |  |
| .....g <u>auccuuuagaa<u>uu</u>ucGAa</u> .....                                                               | 2                                                | 1 | seq |  |
| .....g <u>auccuuuagaa<u>uu</u>ucG</u> a.....                                                                | 1270                                             | 1 | seq |  |
| .....g <u>auccuuuagaa<u>uu</u>ucgca</u> .....                                                               | 3                                                | 0 | seq |  |
| .....g <u>auccuuuagaa<u>Cuu</u>ucgca</u> .....                                                              | 9                                                | 1 | seq |  |
| .....g <u>auccuuuagaa<u>uu</u>ucG</u> Gaa.....                                                              | 884                                              | 1 | seq |  |
| .....g <u>auccuuuagaa<u>uu</u>ucG</u> aaa.....                                                              | 2                                                | 1 | seq |  |
| .....a <u>uccuuuagaa<u>uu</u>ucgc</u> .....                                                                 | 6                                                | 0 | seq |  |
| .....a <u>uccuuuagaa<u>uu</u>ucGU</u> .....                                                                 | 5                                                | 1 | seq |  |
| .....a <u>uccuuuagaa<u>uu</u>ucG</u> .....                                                                  | 939                                              | 1 | seq |  |
| .....a <u>uccuuuagaa<u>uu</u>ucGU</u> a.....                                                                | 1                                                | 1 | seq |  |
| .....a <u>uccuuuagaa<u>uu</u>ucgca</u> .....                                                                | 2                                                | 0 | seq |  |
| .....a <u>uccuuuagaa<u>uu</u>ucG</u> a.....                                                                 | 897                                              | 1 | seq |  |
| .....a <u>uccuuuagaa<u>uu</u>ucG</u> Aaa.....                                                               | 1                                                | 1 | seq |  |
| .....a <u>uccuuuagaa<u>uu</u>ucG</u> Gaa.....                                                               | 357                                              | 1 | seq |  |
| .....a <u>uccuuuagaa<u>uu</u>ucG</u> Aaaa.....                                                              | 1                                                | 1 | seq |  |
| .....u <u>ccuuuagaa<u>uu</u>ucgca</u> .....                                                                 | 7                                                | 0 | seq |  |
| .....u <u>ccuuuagaa<u>uu</u>ucG</u> Aa.....                                                                 | 4                                                | 1 | seq |  |
| .....u <u>ccuuuagaa<u>uu</u>ucG</u> Gaa.....                                                                | 542                                              | 1 | seq |  |
| .....u <u>ccuuuagaa<u>Cuu</u>ucgcaa</u> .....                                                               | 2                                                | 1 | seq |  |
| .....u <u>ccuuuagaa<u>uu</u>ucG</u> Gaaa.....                                                               | 1                                                | 1 | seq |  |
| .....c <u>uuuagaa<u>uu</u>ucG</u> Gaa.....                                                                  | 473                                              | 1 | seq |  |
| .....c <u>uuuagaa<u>uu</u>ucG</u> Gaaa.....                                                                 | 1                                                | 1 | seq |  |

Provisional ID : MA\_960282\_26832  
Score total : 12674.8  
Score for star read(s) : 3.9  
Score for read counts : 12674.9  
Score for mfe : -1.6  
Score for randfold : -2.2  
Score for cons. seed :  
Total read count : 24873  
Mature read count : 24855  
Loop read count : 0  
Star read count : 18

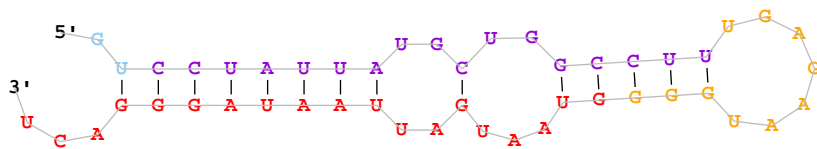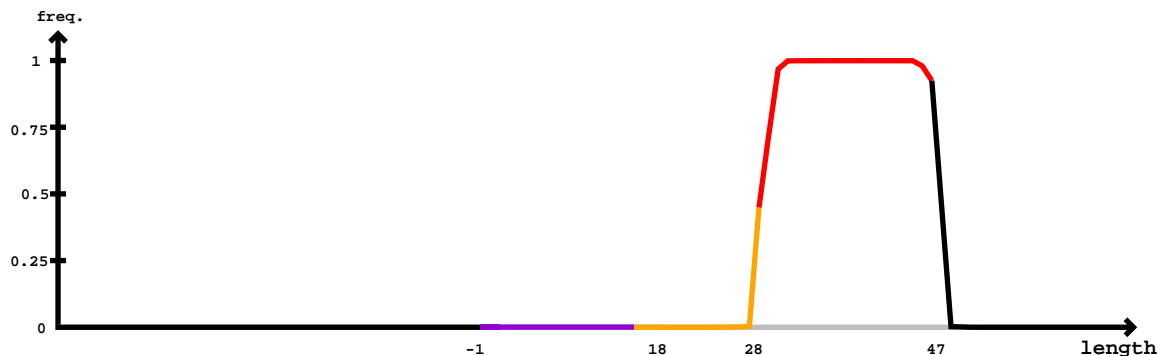

## Star Mature

| 5'                                                                                                         | obs | exp | reads | mm | sample |
|------------------------------------------------------------------------------------------------------------|-----|-----|-------|----|--------|
| uauguaauuacauuauagaaauaggugugcuaaggguauagguccuauuauagcuggccuuugagaauaggguauuauuauagggaacuaagugcccauccauccc |     |     |       |    |        |
| uauguaauuacauuauagaaauaggugugcuaaggguauagguccuauuauagcuggccuuugagaauaggguauuauuauagggaacuaagugcccauccauccc |     |     |       |    |        |
| .((((((.....))))).(((.....(((.....(((.....(((.....(((.....))))).))).....))))).))).....                     |     |     |       |    |        |
| .....guccuauuGugcuggccuu.....                                                                              |     |     | 2     | 1  | seq    |
| .....uccuauuGugcuggccu.....                                                                                |     |     | 4     | 1  | seq    |
| .....uccuauuGugcuggccuu.....                                                                               |     |     | 5     | 1  | seq    |
| .....uccuauuGugcuggccuu.....                                                                               |     |     | 1     | 1  | seq    |
| .....ccuauuGugcuggccuu.....                                                                                |     |     | 6     | 1  | seq    |
| .....Cgggguauuauuauuauu.....                                                                               |     |     | 2     | 1  | seq    |
| .....Cgggguauuauuauuauuag.....                                                                             |     |     | 1     | 1  | seq    |
| .....Cgggguauuauuauuauaggga.....                                                                           |     |     | 2     | 1  | seq    |
| .....Cgggguauuauuauuauagggaac.....                                                                         |     |     | 1     | 1  | seq    |
| .....Cgggguauuauuauuauagggaac.....                                                                         |     |     | 5     | 1  | seq    |
| .....gggguauuauuauuauagggaac.....                                                                          |     |     | 3     | 0  | seq    |
| .....gggguauuauuauuauagggaacG.....                                                                         |     |     | 1     | 1  | seq    |
| .....gggguauuauuauuauagggaacGu.....                                                                        |     |     | 2     | 1  | seq    |
| .....gggguauuauuauuauagggaacGuc.....                                                                       |     |     | 5     | 1  | seq    |
| .....gggguauuauuauuauagggaac.....                                                                          |     |     | 6     | 0  | seq    |
| .....gUguuauuauuauuauagggaac.....                                                                          |     |     | 2     | 1  | seq    |
| .....ggguuauuauuauuauagggaacG.....                                                                         |     |     | 4     | 1  | seq    |
| .....ggguuauuauuauuauagggaacGu.....                                                                        |     |     | 1     | 1  | seq    |
| .....ggguuauuauuauuauagggaacGuc.....                                                                       |     |     | 3     | 1  | seq    |
| .....Uguuauuauuauuauaggga.....                                                                             |     |     | 1     | 1  | seq    |
| .....ggguuauuauuauuauaggga.....                                                                            |     |     | 1     | 0  | seq    |
| .....ggguuauuauuauuauagggaac.....                                                                          |     |     | 2     | 0  | seq    |
| .....Nguaauuauuauuauagggaac.....                                                                           |     |     | 1     | 1  | seq    |
| .....Cguuauuauuauuauagggaac.....                                                                           |     |     | 1     | 1  | seq    |
| .....Nguaauuauuauuauagggaac.....                                                                           |     |     | 1     | 1  | seq    |
| .....gguaauuauuauuauagggaac.....                                                                           |     |     | 1     | 1  | seq    |
| .....Uguuauuauuauuauagggaac.....                                                                           |     |     | 4     | 1  | seq    |
| .....gAuaauuauuauuauagggaac.....                                                                           |     |     | 1     | 1  | seq    |
| .....gguaauuauuauuauagggaac.....                                                                           |     |     | 1     | 1  | seq    |
| .....Cguuauuauuauuauagggaac.....                                                                           |     |     | 1     | 1  | seq    |
| .....gguaauuauuauuauagggaac.....                                                                           |     |     | 12    | 0  | seq    |
| .....gguaauuauuauuauagggaac.....                                                                           |     |     | 1     | 0  | seq    |
| .....gguaauuauuauuauagggaacG.....                                                                          |     |     | 11    | 1  | seq    |

## Star

## Mature

uauguaauuauacauuauagaaaauaggugucuaaggguauugguccuauuuugcugggccuuugagaaugggguaaugauuuauaggggacuaucaagugcccauccauccc

|                                     |      |   |     |
|-------------------------------------|------|---|-----|
| .....Nguaaugauuuauaggggacu.....     | 1    | 1 | seq |
| .....gguaaugauuuauaggggacuGu.....   | 5    | 1 | seq |
| .....gguaaugauuuauaggggacuGuc.....  | 1    | 1 | seq |
| .....gguaaugauuuauaggggacuGuca..... | 2    | 1 | seq |
| .....guaaugaCuaauaggga.....         | 2    | 1 | seq |
| .....guaaugauuuauaggguU.....        | 4    | 1 | seq |
| .....guaaugauuuUuaggga.....         | 1    | 1 | seq |
| .....guaaugauuuaaCaggga.....        | 1    | 1 | seq |
| .....guaaugGuuuauaggga.....         | 2    | 1 | seq |
| .....gCaugauuuauaggga.....          | 1    | 1 | seq |
| .....guaaugCuuuauaggga.....         | 1    | 1 | seq |
| .....guaaugauuuauaggguC.....        | 1    | 1 | seq |
| .....Cuaugauuuauaggga.....          | 1    | 1 | seq |
| .....guaugauuuauaggga.....          | 467  | 0 | seq |
| .....guaugauuuGuaggga.....          | 1    | 1 | seq |
| .....guaugauGauaggga.....           | 1    | 1 | seq |
| .....guaugauuuauagggaA.....         | 6    | 1 | seq |
| .....guaugauuuauaggguCc.....        | 3    | 1 | seq |
| .....Nuauaugauuuauaggga.....        | 1    | 1 | seq |
| .....gAauaugauuuauaggga.....        | 1    | 1 | seq |
| .....guaugGuuuauaggga.....          | 1    | 1 | seq |
| .....guaaGgauuuauaggga.....         | 1    | 1 | seq |
| .....guaugauuuauaggga.....          | 634  | 0 | seq |
| .....guaugauuuauaCggga.....         | 1    | 1 | seq |
| .....guaugauAauaggga.....           | 1    | 1 | seq |
| .....guaugaCuaauaggga.....          | 1    | 1 | seq |
| .....guaugauuuGuaggga.....          | 1    | 1 | seq |
| .....guaGugaauuauaggga.....         | 2    | 1 | seq |
| .....guaCugaauuauaggga.....         | 1    | 1 | seq |
| .....guaaCgaauuauaggga.....         | 2    | 1 | seq |
| .....guaugauCaauaggga.....          | 1    | 1 | seq |
| .....guaugauuuauagggaG.....         | 1    | 1 | seq |
| .....guaugauuuauaggguCcu.....       | 2    | 1 | seq |
| .....guaaGgauuuauagggaacu.....      | 6    | 1 | seq |
| .....guaugauuuaaCagggaacu.....      | 6    | 1 | seq |
| .....guaugauuuauaggguUcu.....       | 1    | 1 | seq |
| .....guCaugauuuauagggaacu.....      | 1    | 1 | seq |
| .....guaugauuuUuagggaacu.....       | 1    | 1 | seq |
| .....guaugUuuauagggaacu.....        | 1    | 1 | seq |
| .....guaauAauuauagggaacu.....       | 1    | 1 | seq |
| .....guaugCuuuauagggaacu.....       | 1    | 1 | seq |
| .....guaugauuuauaggguUacu.....      | 2    | 1 | seq |
| .....guaugauuuauUgggaacu.....       | 4    | 1 | seq |
| .....guaugauuuGuagggaacu.....       | 18   | 1 | seq |
| .....guUaugauuuauagggaacu.....      | 1    | 1 | seq |
| .....guaGugaauuauagggaacu.....      | 15   | 1 | seq |
| .....guaugauuuauaggguUgacu.....     | 4    | 1 | seq |
| .....guaugauuuauaCgggaacu.....      | 1    | 1 | seq |
| .....guaugauuuauagggaCG.....        | 268  | 1 | seq |
| .....guaugGuuuauagggaacu.....       | 28   | 1 | seq |
| .....guaugauuuCaugggaacu.....       | 1    | 1 | seq |
| .....gGaugauuuauagggaacu.....       | 3    | 1 | seq |
| .....guaugaCuaauagggaacu.....       | 17   | 1 | seq |
| .....guaugauAauagggaacu.....        | 1    | 1 | seq |
| .....guaugauGauagggaacu.....        | 6    | 1 | seq |
| .....guaaCgauuauagggaacu.....       | 17   | 1 | seq |
| .....Nuauaugauuuauagggaacu.....     | 14   | 1 | seq |
| .....guaugauuuCuagggaacu.....       | 1    | 1 | seq |
| .....guaugauuuauagggaCA.....        | 205  | 1 | seq |
| .....guaugauuuauaCgggaacu.....      | 1    | 1 | seq |
| .....guaauUauuauagggaacu.....       | 3    | 1 | seq |
| .....guaugauuuauagggaAu.....        | 1    | 1 | seq |
| .....guaugauuuAGagggaacu.....       | 1    | 1 | seq |
| .....guaugauuuauagggaCC.....        | 1264 | 1 | seq |
| .....gCaugauuuauagggaacu.....       | 10   | 1 | seq |
| .....guaaAgauuuauagggaacu.....      | 1    | 1 | seq |
| .....guaUugaauuauagggaacu.....      | 2    | 1 | seq |
| .....guaugauCaauagggaacu.....       | 6    | 1 | seq |
| .....Cuaugauuuauagggaacu.....       | 4    | 1 | seq |
| .....guaugauuuauagggaCgacu.....     | 2    | 1 | seq |



## Star

## Mature

uauguaauuauacauuauagaaaauaggugugcuaaggguagguccuauuauugcuggccuuugagaaugggguaaugauuuaauggggacuaucaagugcccauccauccc

|                                  |      |   |     |
|----------------------------------|------|---|-----|
| .....guaugauuuUauaggggacu.....   | 4    | 1 | seq |
| .....guaugauuuaauaggggacu.....   | 7609 | 0 | seq |
| .....gAaaugauuuaauaggggacu.....  | 4    | 1 | seq |
| .....guaugauuuaauaggggacAa.....  | 1    | 1 | seq |
| .....Nuaaugauuuaauaggggacua..... | 4    | 1 | seq |
| .....guaugauuuaauaggggCcua.....  | 1    | 1 | seq |
| .....guaugaCuauaggggacu.....     | 1    | 1 | seq |
| .....Auaugauuuaauaggggacu.....   | 1    | 1 | seq |
| .....guaauAauuaauaggggacu.....   | 1    | 1 | seq |
| .....guaugauuuaCuaggggacu.....   | 1    | 1 | seq |
| .....guaugauuuaGuaggggacu.....   | 2    | 1 | seq |
| .....guaugauuuaauaggUgacu.....   | 1    | 1 | seq |
| .....guaugauuuaauaggggacu.....   | 383  | 0 | seq |
| .....guaugauuuaauaggggacCa.....  | 8    | 1 | seq |
| .....guaugauCaauaggggacu.....    | 1    | 1 | seq |
| .....guaugauuuaauaggggGcu.....   | 2    | 1 | seq |
| .....guaugauuuaauaggggacGa.....  | 2    | 1 | seq |
| .....guaugauuuaauaggggacuau..... | 2    | 0 | seq |
| .....guaugauuuaauaggggacuA.....  | 1    | 1 | seq |
| .....guaugauuuaauaggggacuAC..... | 1    | 1 | seq |
| .....Aaaugauuuaauaggggac.....    | 2    | 1 | seq |
| .....uaaAgaauuaauaggggac.....    | 1    | 1 | seq |
| .....uaaugauuuaaCaggggac.....    | 1    | 1 | seq |
| .....uaaugaCuauaggggac.....      | 2    | 1 | seq |
| .....uaaugauuuaauaggggac.....    | 680  | 0 | seq |
| .....uaaugauuuaaAaggggac.....    | 1    | 1 | seq |
| .....Naaugauuuaauaggggac.....    | 2    | 1 | seq |
| .....uaaugauuuaaGaggggac.....    | 1    | 1 | seq |
| .....uaGugaauuaauaggggac.....    | 1    | 1 | seq |
| .....uaaugGuuaauaggggac.....     | 2    | 1 | seq |
| .....uaaugauuuaauaggUac.....     | 1    | 1 | seq |
| .....uaaugauuuaauagggaA.....     | 2    | 1 | seq |
| .....uaaugauuuaGuaggggac.....    | 1    | 1 | seq |
| .....Gaaugauuuaauaggggac.....    | 1    | 1 | seq |
| .....uaaugauuuaauagggaG.....     | 1    | 1 | seq |
| .....uaaugauCaauaggggac.....     | 4    | 1 | seq |
| .....uaaugauuuaauaggggacA.....   | 125  | 1 | seq |
| .....Naaugauuuaauaggggacu.....   | 9    | 1 | seq |
| .....uaaugauuuaauagggUcu.....    | 2    | 1 | seq |
| .....uaaugauuuaauagggCcu.....    | 3    | 1 | seq |
| .....uNaugauuuaauaggggacu.....   | 1    | 1 | seq |
| .....uaaugauuuUauaggggacu.....   | 1    | 1 | seq |
| .....uaauAauuaauaggggacu.....    | 2    | 1 | seq |
| .....Aaaugauuuaauaggggacu.....   | 3    | 1 | seq |
| .....uaaugauuuaUuaggggacu.....   | 1    | 1 | seq |
| .....uaaugauuuaaCaggggacu.....   | 5    | 1 | seq |
| .....uaUugaauuaauaggggacu.....   | 3    | 1 | seq |
| .....uaaugauuuaauagggaAu.....    | 1    | 1 | seq |
| .....uaaugauuuaauUggggacu.....   | 4    | 1 | seq |
| .....uaaAgaauuaauaggggacu.....   | 1    | 1 | seq |
| .....uaauUauuaauaggggacu.....    | 1    | 1 | seq |
| .....uaaugaCuauaggggacu.....     | 4    | 1 | seq |
| .....uaaugGuuaauaggggacu.....    | 17   | 1 | seq |
| .....uaaugCuuaauaggggacu.....    | 2    | 1 | seq |
| .....uaGugaauuaauaggggacu.....   | 18   | 1 | seq |
| .....uaaugauuuaauaggUgacu.....   | 3    | 1 | seq |
| .....uaaugauCaauaggggacu.....    | 6    | 1 | seq |
| .....uaaugauuuaauaggggacC.....   | 736  | 1 | seq |
| .....uaCugaauuaauaggggacu.....   | 1    | 1 | seq |
| .....uaaugauuuaGuaggggacu.....   | 13   | 1 | seq |
| .....Gaaugauuuaauaggggacu.....   | 11   | 1 | seq |
| .....uaaugauAaaauaggggacu.....   | 3    | 1 | seq |
| .....uaaugauuuaauaggggacG.....   | 165  | 1 | seq |
| .....uaaugauuuaauaggggacu.....   | 4484 | 0 | seq |
| .....uaaCgaauuaauaggggacu.....   | 7    | 1 | seq |
| .....uaauAauuaauaggggacu.....    | 1    | 1 | seq |
| .....uaaugGuuaauaggggacu.....    | 2    | 1 | seq |
| .....uaaugauuuaauaggAgacu.....   | 2    | 1 | seq |
| .....uaaugauuuaGuaggggacu.....   | 1    | 1 | seq |
| .....uaaugauuuaauaggggacu.....   | 297  | 0 | seq |

## Mature

|                            |      |   |     |
|----------------------------|------|---|-----|
| uaGugauuaauagggacua.....   | 2    | 1 | seq |
| uaaGugauuaauagggacCa.....  | 7    | 1 | seq |
| uaaGugauuaauagggacGa.....  | 1    | 1 | seq |
| AaaGugauuaauagggacua.....  | 1    | 1 | seq |
| uaaGugauuaauagggacua.....  | 1    | 0 | seq |
| uaaGugauuaauagggacuaA..... | 1    | 1 | seq |
| aUugauuaauagggacu.....     | 1    | 1 | seq |
| aaGugauuaauUgggacu.....    | 1    | 1 | seq |
| aaGugauuaauagggUacu.....   | 3    | 1 | seq |
| aaUuauuaauagggacu.....     | 2    | 1 | seq |
| aaGugauuaauagggacA.....    | 116  | 1 | seq |
| aaGugauuaauagggacAu.....   | 2    | 1 | seq |
| aaGugauuaUuagggacu.....    | 3    | 1 | seq |
| aaGugauuaauagggacG.....    | 169  | 1 | seq |
| aaGugauuaCuagggacu.....    | 1    | 1 | seq |
| aaGugauuaauagggacu.....    | 4753 | 0 | seq |
| aaGugauCaauagggacu.....    | 10   | 1 | seq |
| aaGugauCuauagggacu.....    | 15   | 1 | seq |
| aaGugauuaGuagggacu.....    | 21   | 1 | seq |
| aGugauuaauagggacu.....     | 32   | 1 | seq |
| aaGugauuaauagggUcu.....    | 2    | 1 | seq |
| aaGugauuaauagggacu.....    | 1    | 1 | seq |
| aaGugauuaauaggUgacu.....   | 3    | 1 | seq |
| Caugauuaauagggacu.....     | 3    | 1 | seq |
| aaCgauuaauagggacu.....     | 7    | 1 | seq |
| aaGgauuaauagggacu.....     | 3    | 1 | seq |
| aaGugauuaauagggCacu.....   | 1    | 1 | seq |
| aaGugauuaaCagggacu.....    | 5    | 1 | seq |
| aaugGuuaauagggacu.....     | 18   | 1 | seq |
| Naugauuaauagggacu.....     | 11   | 1 | seq |
| aCugauuaauagggacu.....     | 1    | 1 | seq |
| aaugauuaauagggCcu.....     | 1    | 1 | seq |
| Uaugauuaauagggacu.....     | 6    | 1 | seq |
| aaugauuaauagggacC.....     | 817  | 1 | seq |
| aaAgauuaauagggacu.....     | 3    | 1 | seq |
| aaugauuaauCgggacu.....     | 2    | 1 | seq |
| aaugauuaauagggacAa.....    | 2    | 1 | seq |
| aaugauuaauagggacGa.....    | 2    | 1 | seq |
| aaugauuaauagggacCa.....    | 2    | 1 | seq |
| aaugGuuaauagggacua.....    | 1    | 1 | seq |
| aaugaCuauagggacua.....     | 1    | 1 | seq |
| aaugauuaauagggacua.....    | 244  | 0 | seq |
| aaugauuaauagggacuaC.....   | 1    | 1 | seq |
| aaugauuaauagggacuauC.....  | 1    | 0 | seq |
| aGugauuaauagggacuauC.....  | 1    | 1 | seq |
| augauuaauagggacGa.....     | 4    | 1 | seq |
| Cugauuaauagggacua.....     | 1    | 1 | seq |
| augauuaGuagggacua.....     | 1    | 1 | seq |
| augauuaauCgggacua.....     | 1    | 1 | seq |
| augauuaauagggacua.....     | 720  | 0 | seq |
| augauuaauagggacCa.....     | 8    | 1 | seq |
| Uugauuaauagggacua.....     | 2    | 1 | seq |
| augauuaauaggUgacua.....    | 1    | 1 | seq |
| augauuaauagggaGua.....     | 1    | 1 | seq |
| augauuaauagggAacua.....    | 2    | 1 | seq |
| augauuaauagggGcua.....     | 3    | 1 | seq |
| Gugauuaauagggacua.....     | 3    | 1 | seq |
| augauuaauagggacAa.....     | 1    | 1 | seq |
| augaCuauagggacua.....      | 1    | 1 | seq |
| augauuaauagggUcua.....     | 1    | 1 | seq |
| aCgauuaauagggacua.....     | 1    | 1 | seq |
| augauuaauagggacuaA.....    | 1    | 1 | seq |
| augauuaauagggacuaC.....    | 1    | 1 | seq |
| augauuaauagggacuau.....    | 3    | 0 | seq |
| augauuaauagggacuauC.....   | 5    | 0 | seq |
| augauuaauagggacuaAc.....   | 1    | 1 | seq |
| ugauuaauagggacuaC.....     | 1    | 1 | seq |
| ugauuaauagggacuau.....     | 3    | 0 | seq |
| ugauuaauagggacuauA.....    | 1    | 1 | seq |
| ugauuaauagggacuauG.....    | 1    | 1 | seq |



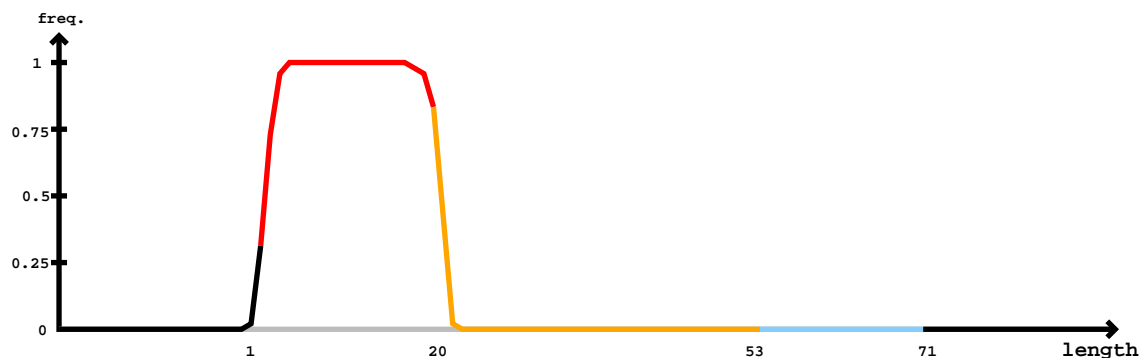[illegible]

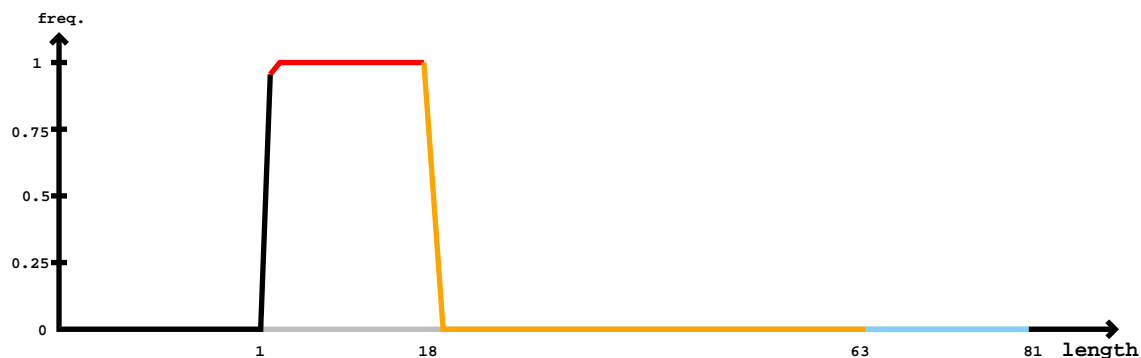

Star

[illegible]

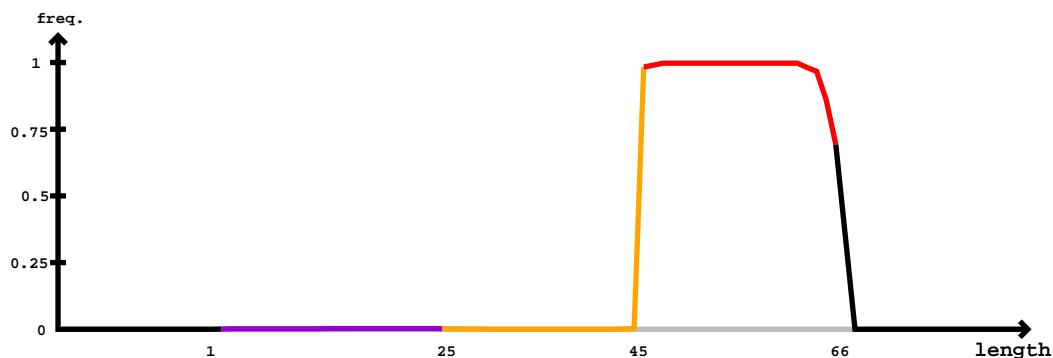

## Mature

|                                                                                                                                                                     |                                                                                                  | -3'   | obs |        |
|---------------------------------------------------------------------------------------------------------------------------------------------------------------------|--------------------------------------------------------------------------------------------------|-------|-----|--------|
|                                                                                                                                                                     |                                                                                                  |       | exp |        |
|                                                                                                                                                                     |                                                                                                  | reads | mm  | sample |
| 5'-gaguuugagcaggua <u>a</u> uguc <u>a</u> aaac <u>c</u> aggg <u>a</u> aggag <u>c</u> auuggacaaca <u>a</u> aa <u>a</u> aaagguuuucaaggauuugcauggcacuacuagcaugggauugug | .((((((...((( (((((((((( ((((( ((...((( (((((...))))).).....)))))..(.)..))))))))....)....))))).. | 1     | 1   | seq    |
| gaguuuugagcaggua <u>a</u> uguc <u>a</u> aaac <u>c</u> aggg <u>a</u> aggag <u>c</u> auuggacaaca <u>a</u> aa <u>a</u> aaagguuuucaaggauuugcauggcacuacuagcaugggauugug   | ..... <u>a</u> uaguc <u>a</u> aaac <u>c</u> aggg <u>a</u> aggagU.....                            | 1     | 1   | seq    |
|                                                                                                                                                                     | ..... <u>u</u> auguc <u>a</u> aaac <u>c</u> aggg <u>a</u> aggA <u>c</u> a.....                   | 1     | 1   | seq    |
|                                                                                                                                                                     | .....ccagggaaggau <u>c</u> auug.....                                                             | 1     | 1   | seq    |
|                                                                                                                                                                     | .....gUguuuucaaggauuugca.....                                                                    | 1     | 1   | seq    |
|                                                                                                                                                                     | .....UGuuuuucaaggauuugcaugg.....                                                                 | 2     | 1   | seq    |
|                                                                                                                                                                     | .....AGuuuuucaaggauuugcaugg.....                                                                 | 1     | 1   | seq    |
|                                                                                                                                                                     | .....guuuucaaggauuugcG.....                                                                      | 1     | 1   | seq    |
|                                                                                                                                                                     | .....guuuucaaggauuugca.....                                                                      | 16    | 0   | seq    |
|                                                                                                                                                                     | .....guuuucaaaAGauuugca.....                                                                     | 1     | 1   | seq    |
|                                                                                                                                                                     | .....guuuucaaggauuugcaC.....                                                                     | 2     | 1   | seq    |
|                                                                                                                                                                     | .....guuuucaaggauuugcaA.....                                                                     | 1     | 1   | seq    |
|                                                                                                                                                                     | .....guuuucaaggauuugcaG.....                                                                     | 1     | 1   | seq    |
|                                                                                                                                                                     | .....guuuucaaggauuugcau.....                                                                     | 13    | 0   | seq    |
|                                                                                                                                                                     | .....guuuucaaggauuugcaGg.....                                                                    | 1     | 1   | seq    |
|                                                                                                                                                                     | .....guuuucaaggauuugcaug.....                                                                    | 110   | 0   | seq    |
|                                                                                                                                                                     | .....guuuucGaggauuugcaug.....                                                                    | 1     | 1   | seq    |
|                                                                                                                                                                     | .....guuuucaaggauugcaug.....                                                                     | 1     | 1   | seq    |
|                                                                                                                                                                     | .....guuuucaaggauuugcaCg.....                                                                    | 1     | 1   | seq    |
|                                                                                                                                                                     | .....guuuucaaggacUugcaug.....                                                                    | 1     | 1   | seq    |
|                                                                                                                                                                     | .....guuuucaaggauuugcauA.....                                                                    | 1     | 1   | seq    |
|                                                                                                                                                                     | .....guuuCCaaggauuugcaugg.....                                                                   | 2     | 1   | seq    |
|                                                                                                                                                                     | .....Nuuuucaaggauuugcaugg.....                                                                   | 2     | 1   | seq    |
|                                                                                                                                                                     | .....guuuucaaggauuugcaugU.....                                                                   | 5     | 1   | seq    |
|                                                                                                                                                                     | .....guuuucaaggauuugcaugC.....                                                                   | 4     | 1   | seq    |
|                                                                                                                                                                     | .....guuuucaaggauuugcaugg.....                                                                   | 168   | 0   | seq    |
|                                                                                                                                                                     | .....guuuucaaggGUuugcaugg.....                                                                   | 1     | 1   | seq    |
|                                                                                                                                                                     | .....gCuuuucaaggauuugcaugg.....                                                                  | 2     | 1   | seq    |
|                                                                                                                                                                     | .....guuuucaaggauuugcauAg.....                                                                   | 3     | 1   | seq    |
|                                                                                                                                                                     | .....guuuucaaggauuugcaCgg.....                                                                   | 1     | 1   | seq    |
|                                                                                                                                                                     | .....guuuucaaggauuugcGugg.....                                                                   | 1     | 1   | seq    |
|                                                                                                                                                                     | .....guuuucGaggauuugcaugg.....                                                                   | 1     | 1   | seq    |
|                                                                                                                                                                     | .....guuuucaaggauuugcauggc.....                                                                  | 2     | 0   | seq    |
|                                                                                                                                                                     | .....guuuucaaggauuugcauggA.....                                                                  | 772   | 1   | seq    |

## Star

## Mature

|                                                                                                          |    |   |     |
|----------------------------------------------------------------------------------------------------------|----|---|-----|
| gaguuuugagcagguauuauugucaaaaccaggggaaggagcauugggacaacaauaaaggguuuuucaaggauuuugcauggcacuacuagcaugggauugug |    |   |     |
| .....guuuucaaggauuuugcauggG.....                                                                         | 31 | 1 | seq |
| .....guuuucaaggauuuugcauggU.....                                                                         | 13 | 1 | seq |
| .....guuuucaaggauuuugcauggAa.....                                                                        | 2  | 1 | seq |
| .....uuuucaaggauuuugcaug.....                                                                            | 3  | 0 | seq |
| .....uuuucaaggauCugcaugg.....                                                                            | 1  | 1 | seq |
| .....uuuucaaggauuuugcaugg.....                                                                           | 3  | 0 | seq |
| .....uuuucaaggauuuugcauggG.....                                                                          | 1  | 1 | seq |
| .....uuuGaaggauuuugcaug.....                                                                             | 1  | 1 | seq |
| .....uuucaaggauuuugcaug.....                                                                             | 7  | 0 | seq |
| .....uuucaaggauuuugcaugg.....                                                                            | 1  | 0 | seq |

Provisional ID : MA\_990907\_33978  
 Score total : 0.1  
 Score for star read(s) : -1.3  
 Score for read counts : 0  
 Score for mfe : -0.1  
 Score for randfold : 1.6  
 Score for cons. seed :  
 Total read count : 1601  
 Mature read count : 1601  
 Loop read count : 0  
 Star read count : 0

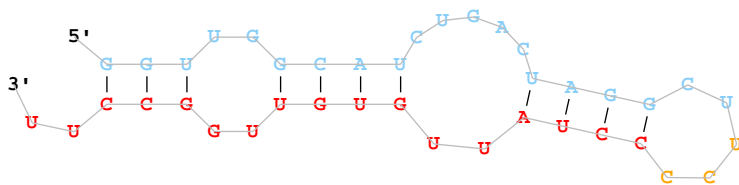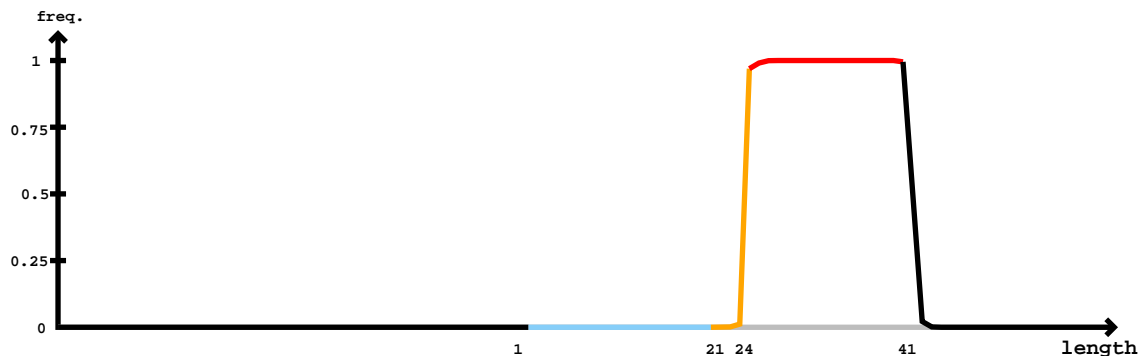

|                                                               |                       | Star               |                 | Mature               |  |       |     |        |  |
|---------------------------------------------------------------|-----------------------|--------------------|-----------------|----------------------|--|-------|-----|--------|--|
| 5'                                                            |                       |                    |                 |                      |  | -3'   | exp |        |  |
| uuuccugacugcucauccuuuuuuggagcauugcccuucucuuaug                | ggguuggcaucugacuaggcu | ucccu              | aauguguguggccuu | uuggggcacaaaugucucau |  | reads | mm  | sample |  |
| .....(((.(((.....))))).(((.....(((.....))))).)))).....))..... |                       | ucAccuauuguguggccu |                 |                      |  | 1     | 1   | seq    |  |
| .....Gcccuauuguguggccu                                        |                       |                    |                 |                      |  | 1     | 1   | seq    |  |
| .....Nccuauuguguggccu                                         |                       |                    |                 |                      |  | 2     | 1   | seq    |  |
| .....Gccuauuguguggccu                                         |                       |                    |                 |                      |  | 1     | 1   | seq    |  |
| .....cccuauuguguggccC                                         |                       |                    |                 |                      |  | 1     | 1   | seq    |  |
| .....cccuauuguguggccu                                         |                       |                    |                 |                      |  | 2     | 0   | seq    |  |
| .....Accuauuguguggccuu                                        |                       |                    |                 |                      |  | 1     | 1   | seq    |  |
| .....Gccuauuguguggccuu                                        |                       |                    |                 |                      |  | 1     | 1   | seq    |  |
| .....cccuauuguguggccuu                                        |                       |                    |                 |                      |  | 5     | 0   | seq    |  |
| .....Nccuauuguguggccuu                                        |                       |                    |                 |                      |  | 1     | 1   | seq    |  |
| .....cccuauuguguggccuC                                        |                       |                    |                 |                      |  | 1     | 1   | seq    |  |
| .....cccuauuguguggccuC                                        |                       |                    |                 |                      |  | 2     | 1   | seq    |  |
| .....ccuauuguguggccuG                                         |                       |                    |                 |                      |  | 21    | 1   | seq    |  |
| .....ccuauuGuguggccuu                                         |                       |                    |                 |                      |  | 1     | 1   | seq    |  |
| .....ccuauugugugAggccuu                                       |                       |                    |                 |                      |  | 1     | 1   | seq    |  |
| .....ccuauugugugCggccuu                                       |                       |                    |                 |                      |  | 3     | 1   | seq    |  |
| .....ccuauugugugggccGu                                        |                       |                    |                 |                      |  | 3     | 1   | seq    |  |
| .....Ucuauuguguggccuu                                         |                       |                    |                 |                      |  | 3     | 1   | seq    |  |
| .....ccuauuguguggccuA                                         |                       |                    |                 |                      |  | 26    | 1   | seq    |  |
| .....ccuGuuguguggccuu                                         |                       |                    |                 |                      |  | 2     | 1   | seq    |  |
| .....ccuauuguguuAgccuu                                        |                       |                    |                 |                      |  | 2     | 1   | seq    |  |
| .....ccuauugugugggccuu                                        |                       |                    |                 |                      |  | 1     | 1   | seq    |  |
| .....ccuauugugCuggccuu                                        |                       |                    |                 |                      |  | 6     | 1   | seq    |  |
| .....Gcuauuguguggccuu                                         |                       |                    |                 |                      |  | 2     | 1   | seq    |  |
| .....Ncuauuguguggccuu                                         |                       |                    |                 |                      |  | 1     | 1   | seq    |  |
| .....ccuauuguguggccuu                                         |                       |                    |                 |                      |  | 6     | 1   | seq    |  |
| .....ccuauugCguuggccuu                                        |                       |                    |                 |                      |  | 5     | 1   | seq    |  |
| .....ccuauuguguggccCu                                         |                       |                    |                 |                      |  | 14    | 1   | seq    |  |
| .....ccuauuguguggccuu                                         |                       |                    |                 |                      |  | 1378  | 0   | seq    |  |
| .....ccuauCguuggccuu                                          |                       |                    |                 |                      |  | 4     | 1   | seq    |  |
| .....ccuauuguguggccuGu                                        |                       |                    |                 |                      |  | 1     | 1   | seq    |  |
| .....ccuauuguguggccuuu                                        |                       |                    |                 |                      |  | 39    | 0   | seq    |  |
| .....ccuauuguguggccuCu                                        |                       |                    |                 |                      |  | 1     | 1   | seq    |  |
| .....ccuauuguguggccuCu                                        |                       |                    |                 |                      |  | 13    | 1   | seq    |  |



# Star

# Mature

|                                                                                                                 |    |   |     |
|-----------------------------------------------------------------------------------------------------------------|----|---|-----|
| uuuccugacugcucacuccuuuuuugggagcauugcccuucuuuauugggugggcaucugacuaaggcuucccuaauugugugggccuuuuggggcacaaaauugucucau |    |   |     |
| .....ccuaauugugugggccuuuGg.....                                                                                 | 1  | 1 | seq |
| .....cuauugugugggccuuu.....                                                                                     | 24 | 0 | seq |
| .....cuauugAgugggccuuu.....                                                                                     | 1  | 1 | seq |
| .....cuauugugugggccuCu.....                                                                                     | 2  | 1 | seq |
| .....cuaCugugugggccuuu.....                                                                                     | 1  | 1 | seq |
| .....cuauugugugggccuuCu.....                                                                                    | 6  | 1 | seq |
| .....uaugugugugggccuuCu.....                                                                                    | 14 | 1 | seq |
| .....auugugugggccuuGg.....                                                                                      | 1  | 1 | seq |

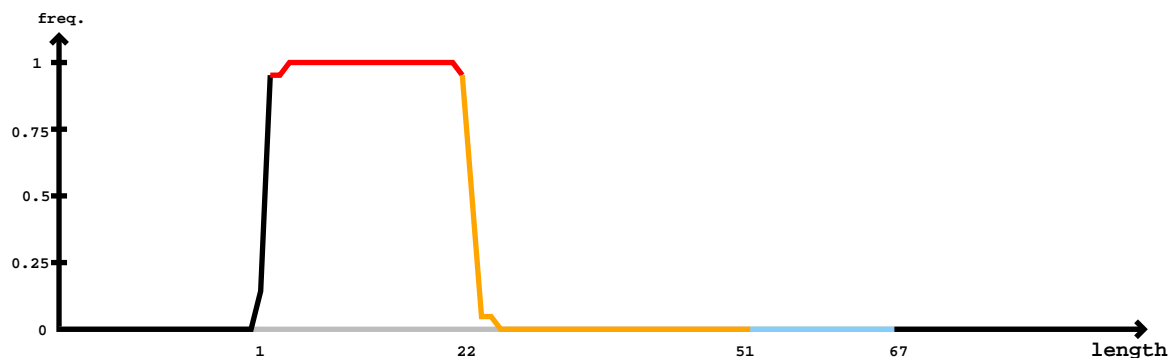

Star

|     |                                                                                                                              |       |       |
|-----|------------------------------------------------------------------------------------------------------------------------------|-------|-------|
| 5'- | uuuaagcagugucuuuuug <u>cagauagaucuucugugcagguaucaccauaauuacaugguugaaaa</u> <u>ccccaagaauucagga</u> aagaaggugcacuagcacuaauuuu | -3'   | exp   |
|     | .....(((((((.....((((.....((((.....((((.....((((.....))))))..)))..))))))))))))))))))))).)))).....                            | reads | mm    |
|     | .....Tuagauagaucuucugugcag.....                                                                                              | 1     | 1 seq |
|     | .....Tuagauagaucuucugugcagg.....                                                                                             | 2     | 1 seq |
|     | .....uagauagaucuucugugcagA.....                                                                                              | 2     | 1 seq |
|     | .....uagauagaucuucugugcagU.....                                                                                              | 1     | 1 seq |
|     | .....Gagauagaucuucugugcagg.....                                                                                              | 1     | 1 seq |
|     | .....uagauagaucuucugugcagg.....                                                                                              | 11    | 0 seq |
|     | .....uagauagaCcuucugugcagg.....                                                                                              | 1     | 1 seq |
|     | .....uagauagaucuucugugcaggCau.....                                                                                           | 1     | 1 seq |
|     | .....gGuagaucuucugugcagg.....                                                                                                | 1     | 1 seq |
