# Supplementary material for: Transcriptome Analysis of mRNA and miRNA in Somatic Embryos of Larix leptolepis Subjected to Hydrogen Treatment
Source: MDPI journal article supplement (doi:10.3390/ijms17111951), 2016-11-22
Supplement: s1 [file s1]

# Supplementary Materials: Transcriptome Analysis of mRNA and miRNA in Somatic Embryos of *Larix leptolepis* Subjected to Hydrogen Treatment

Yali Liu, Suying Han, Xiangming Ding, Xinmin Li, Lifeng Zhang, Wanfeng Li, Haiyan Xu, Zhixin Li and Liwang Qi

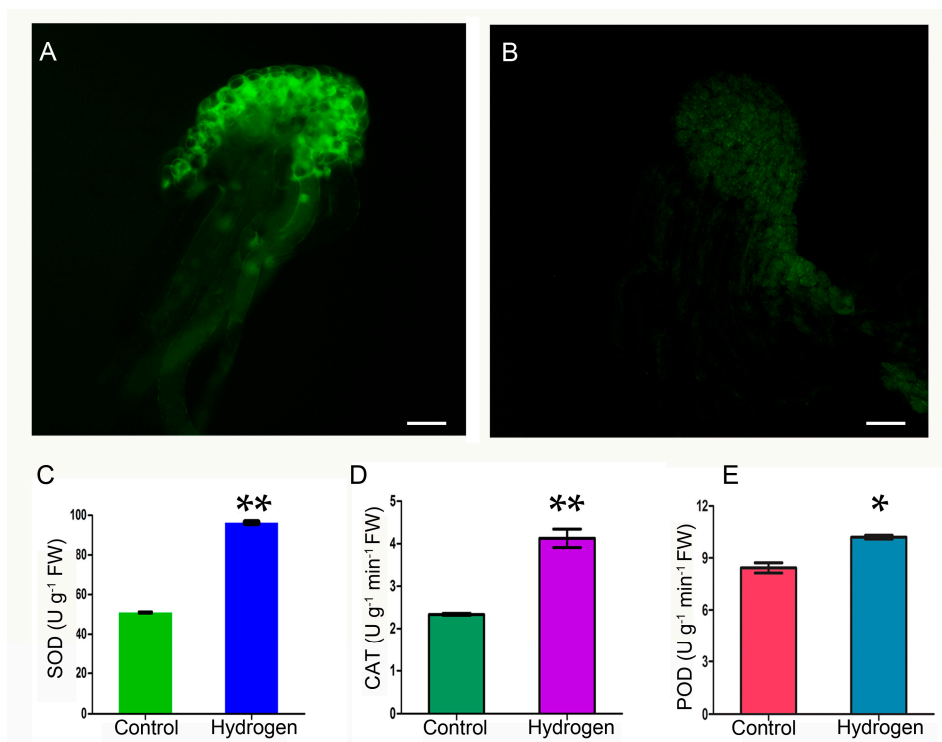

**Figure S1.** ROS levels and antioxidant enzyme activity in PEMs at 36 days after H<sub>2</sub> treatment. ROS levels in PEMs on the control medium (A); and hydrogen-rich medium (B); Effects of hydrogen treatment on superoxide dismutase (SOD) (C); catalase (CAT) (D); and peroxidase (POD) (E) activity in PEMs. Data represent means  $\pm$  standard error from three independent experiments. Asterisks indicate significant difference at \*  $p < 0.05$  or \*\*  $p < 0.01$  by Student's  $t$  test. Scale bars, 50  $\mu$ m in (A and B).
